# Supplementary material for: Phylogenetic modeling of enhancer shifts in African mole-rats reveals regulatory changes associated with tissue-specific traits
Source: HighWire-hosted journal article supplement (doi:10.1101/gr.277715.123), 2023-08-25
Supplement: Supplemental_Table_S1.xlsx [file Supplemental_Table_S1.xlsx]

## Sheet: Sheet 1
Table S1. Species and tissue samples used in this study, related to Figure 1, Figure S1 and Methods. For the four species in the dataset, we provide here experimental details regarding origin of the samples, sex, ages, breeding class and number of replicates for each profiled histone mark and tissue.
Species common name / Abbreviation	Species scientific name	Genome assembly used (Ensembl v99)	Age of sexual maturity / lifespan	Provider	Provider class	Sex	Age (months)	Breeding class	Number of replicates (liver / heart)
									H3K27ac	H3K4me3	H3K4me1
Naked mole-rat (Hgla)	Heterocephalus glaber	HetGla_1.0	8-12 months / 30 years	Department of Pharmacology, University of Cambridge, UK	Research colony	M, M, M, M, M	13, 14, 17, 17, 15	Non-breeders	5 / 3	4 / 4	5 / 3
Damaraland mole-rat (Fdam)	Fukomys damarensis	DMR_v1.0	17 months / 12 years	Kalahari Research Trust, South Africa	Research reserve	M, M, M, M, F, F	48, 48, 36, 36, 48 (estimated)	Unknown (wild-caught)	5 / 4	2 / 5	5 / 5
Guinea pig (Cpor)	Cavia porcellus	Cavpor3.0	3-5 weeks / 4-8 years	Harlan LTD, UK	Commercial provider	M, M, M	2.3	Surplus breeding stock	3 / 3	3 / 3	3 / 3
Mouse (Mmus)	Mus musculus domesticus (C57BL/6J)	GRCm38	6-8 weeks / 1-3 years	Charles River, UK	Commercial provider	M, M, M, M, M, M, M, M	2	Surplus breeding stock	4 / 6	4 / 6	4 / 5
