# Supplementary material for: Phylogenetic modeling of enhancer shifts in African mole-rats reveals regulatory changes associated with tissue-specific traits
Source: HighWire-hosted journal article supplement (doi:10.1101/gr.277715.123), 2023-08-25
Supplement: Supplemental_Table_S2.xlsx [file Supplemental_Table_S2.xlsx]

## Sheet: TABLE S2A
		Supplemental Table S2. Simulations to calibrate statistical thresholds for the branch-shift test of the phylogenetic modeling approach. A. For the different elements sets and mole-rat branches, we performed simulations to assess statistical power of the branch-shift test at different statistical thresholds (Methods). We report here the optimal significance threshold alpha obtained with the Youden…
Elements set	Branch with shift	simulation settings	AUC value	Best alpha given ROC curve (Youden Index)	False positive rate	True positive rate (Recall)	False discovery rate	Precision
Liver Promoters	ancestral mole-rats	95% under null, 5% with a branch shift	0.92	0.29	0.27	0.98	0.84	0.159468
Liver Promoters	ancestral mole-rats	92.5% under null, 7.5% with a branch shift	0.93	0.15	0.14	0.89	0.67	0.333333
Liver Promoters	ancestral mole-rats	90% under null, 10% with a branch shift	0.93	0.18	0.17	0.93	0.63	0.373494
Liver Promoters	ancestral mole-rats	87.5% under null, 12.5% with a branch shift	0.92	0.17	0.19	0.93	0.59	0.409253
Liver Promoters	ancestral mole-rats	85% under null, 15% with a branch shift	0.92	0.2	0.2	0.89	0.56	0.443709
Liver Promoters	ancestral mole-rats	82.5% under null, 17.5% with a branch shift	0.93	0.16	0.14	0.86	0.44	0.559387
Heart Promoters	ancestral mole-rats	95% under null, 5% with a branch shift	0.95	0.19	0.14	0.92	0.75	0.254144
Heart Promoters	ancestral mole-rats	92.5% under null, 7.5% with a branch shift	0.96	0.18	0.15	0.95	0.67	0.334906
Heart Promoters	ancestral mole-rats	90% under null, 10% with a branch shift	0.96	0.14	0.09	0.89	0.47	0.53012
Heart Promoters	ancestral mole-rats	87.5% under null, 12.5% with a branch shift	0.94	0.12	0.09	0.86	0.42	0.583333
Heart Promoters	ancestral mole-rats	85% under null, 15% with a branch shift	0.95	0.17	0.14	0.93	0.46	0.53876
Heart Promoters	ancestral mole-rats	82.5% under null, 17.5% with a branch shift	0.96	0.14	0.11	0.94	0.35	0.649606
Liver Enhancers	ancestral mole-rats	95% under null, 5% with a branch shift	0.88	0.29	0.27	0.9	0.85	0.147541
Liver Enhancers	ancestral mole-rats	92.5% under null, 7.5% with a branch shift	0.9	0.2	0.2	0.89	0.74	0.258687
Liver Enhancers	ancestral mole-rats	90% under null, 10% with a branch shift	0.89	0.29	0.27	0.94	0.72	0.275964
Liver Enhancers	ancestral mole-rats	87.5% under null, 12.5% with a branch shift	0.88	0.19	0.22	0.88	0.64	0.364238
Liver Enhancers	ancestral mole-rats	85% under null, 15% with a branch shift	0.87	0.28	0.27	0.89	0.63	0.369748
Liver Enhancers	ancestral mole-rats	82.5% under null, 17.5% with a branch shift	0.89	0.29	0.26	0.89	0.58	0.41555
Heart Enhancers	ancestral mole-rats	95% under null, 5% with a branch shift	0.92	0.12	0.1	0.8	0.70	0.3
Heart Enhancers	ancestral mole-rats	92.5% under null, 7.5% with a branch shift	0.93	0.17	0.16	0.88	0.69	0.306604
Heart Enhancers	ancestral mole-rats	90% under null, 10% with a branch shift	0.93	0.17	0.15	0.86	0.61	0.391509
Heart Enhancers	ancestral mole-rats	87.5% under null, 12.5% with a branch shift	0.9	0.17	0.15	0.86	0.56	0.440329
Heart Enhancers	ancestral mole-rats	85% under null, 15% with a branch shift	0.92	0.22	0.21	0.91	0.56	0.437299
Heart Enhancers	ancestral mole-rats	82.5% under null, 17.5% with a branch shift	0.93	0.2	0.17	0.94	0.46	0.537705
Liver Promoters	Hgla (naked mole-rat)	95% under null, 5% with a branch shift	0.88	0.17	0.16	0.76	0.81	0.194737
Liver Promoters	Hgla (naked mole-rat)	92.5% under null, 7.5% with a branch shift	0.92	0.31	0.24	0.93	0.76	0.236486
Liver Promoters	Hgla (naked mole-rat)	90% under null, 10% with a branch shift	0.89	0.17	0.16	0.8	0.65	0.351351
Liver Promoters	Hgla (naked mole-rat)	87.5% under null, 12.5% with a branch shift	0.92	0.15	0.15	0.84	0.55	0.448276
Liver Promoters	Hgla (naked mole-rat)	85% under null, 15% with a branch shift	0.88	0.27	0.26	0.87	0.63	0.371758
Liver Promoters	Hgla (naked mole-rat)	82.5% under null, 17.5% with a branch shift	0.9	0.22	0.2	0.87	0.52	0.478125
Heart Promoters	Hgla (naked mole-rat)	95% under null, 5% with a branch shift	0.94	0.16	0.18	0.94	0.79	0.210046
Heart Promoters	Hgla (naked mole-rat)	92.5% under null, 7.5% with a branch shift	0.92	0.14	0.16	0.88	0.69	0.306977
Heart Promoters	Hgla (naked mole-rat)	90% under null, 10% with a branch shift	0.92	0.14	0.15	0.85	0.61	0.385321
Heart Promoters	Hgla (naked mole-rat)	87.5% under null, 12.5% with a branch shift	0.91	0.12	0.11	0.81	0.5	0.502564
Heart Promoters	Hgla (naked mole-rat)	85% under null, 15% with a branch shift	0.92	0.24	0.2	0.91	0.56	0.444805
Heart Promoters	Hgla (naked mole-rat)	82.5% under null, 17.5% with a branch shift	0.93	0.18	0.19	0.91	0.5	0.501597
Liver Enhancers	Hgla (naked mole-rat)	95% under null, 5% with a branch shift	0.83	0.23	0.22	0.76	0.85	0.151639
Liver Enhancers	Hgla (naked mole-rat)	92.5% under null, 7.5% with a branch shift	0.89	0.29	0.21	0.85	0.75	0.245211
Liver Enhancers	Hgla (naked mole-rat)	90% under null, 10% with a branch shift	0.83	0.25	0.23	0.76	0.73	0.270463
Liver Enhancers	Hgla (naked mole-rat)	87.5% under null, 12.5% with a branch shift	0.89	0.2	0.19	0.81	0.63	0.367273
Liver Enhancers	Hgla (naked mole-rat)	85% under null, 15% with a branch shift	0.82	0.32	0.31	0.85	0.68	0.323834
Liver Enhancers	Hgla (naked mole-rat)	82.5% under null, 17.5% with a branch shift	0.86	0.28	0.26	0.86	0.59	0.414566
Heart Enhancers	Hgla (naked mole-rat)	95% under null, 5% with a branch shift	0.9	0.24	0.25	0.94	0.84	0.16129
Heart Enhancers	Hgla (naked mole-rat)	92.5% under null, 7.5% with a branch shift	0.88	0.23	0.25	0.89	0.78	0.223333
Heart Enhancers	Hgla (naked mole-rat)	90% under null, 10% with a branch shift	0.87	0.15	0.16	0.78	0.65	0.348416
Heart Enhancers	Hgla (naked mole-rat)	87.5% under null, 12.5% with a branch shift	0.87	0.19	0.17	0.8	0.61	0.393701
Heart Enhancers	Hgla (naked mole-rat)	85% under null, 15% with a branch shift	0.87	0.23	0.19	0.81	0.58	0.423077
Heart Enhancers	Hgla (naked mole-rat)	82.5% under null, 17.5% with a branch shift	0.89	0.26	0.24	0.88	0.57	0.426997
Liver Promoters	Fdam (Damaraland mole-rat)	95% under null, 5% with a branch shift	0.89	0.23	0.26	0.88	0.85	0.148789
Liver Promoters	Fdam (Damaraland mole-rat)	92.5% under null, 7.5% with a branch shift	0.89	0.18	0.21	0.87	0.75	0.253906
Liver Promoters	Fdam (Damaraland mole-rat)	90% under null, 10% with a branch shift	0.9	0.23	0.26	0.91	0.72	0.28
Liver Promoters	Fdam (Damaraland mole-rat)	87.5% under null, 12.5% with a branch shift	0.89	0.14	0.15	0.78	0.57	0.429224
Liver Promoters	Fdam (Damaraland mole-rat)	85% under null, 15% with a branch shift	0.88	0.09	0.1	0.71	0.43	0.574713
Liver Promoters	Fdam (Damaraland mole-rat)	82.5% under null, 17.5% with a branch shift	0.89	0.23	0.23	0.87	0.55	0.447447
Heart Promoters	Fdam (Damaraland mole-rat)	95% under null, 5% with a branch shift	0.92	0.14	0.14	0.86	0.76	0.238636
Heart Promoters	Fdam (Damaraland mole-rat)	92.5% under null, 7.5% with a branch shift	0.95	0.13	0.11	0.88	0.61	0.390533
Heart Promoters	Fdam (Damaraland mole-rat)	90% under null, 10% with a branch shift	0.95	0.11	0.1	0.89	0.5	0.502857
Heart Promoters	Fdam (Damaraland mole-rat)	87.5% under null, 12.5% with a branch shift	0.92	0.18	0.2	0.91	0.61	0.390411
Heart Promoters	Fdam (Damaraland mole-rat)	85% under null, 15% with a branch shift	0.92	0.15	0.17	0.88	0.52	0.48289
Heart Promoters	Fdam (Damaraland mole-rat)	82.5% under null, 17.5% with a branch shift	0.93	0.14	0.13	0.87	0.42	0.583969
Liver Enhancers	Fdam (Damaraland mole-rat)	95% under null, 5% with a branch shift	0.84	0.08	0.08	0.62	0.72	0.277228
Liver Enhancers	Fdam (Damaraland mole-rat)	92.5% under null, 7.5% with a branch shift	0.85	0.26	0.3	0.89	0.8	0.195846
Liver Enhancers	Fdam (Damaraland mole-rat)	90% under null, 10% with a branch shift	0.85	0.28	0.3	0.87	0.76	0.241667
Liver Enhancers	Fdam (Damaraland mole-rat)	87.5% under null, 12.5% with a branch shift	0.83	0.28	0.3	0.83	0.72	0.280654
Liver Enhancers	Fdam (Damaraland mole-rat)	85% under null, 15% with a branch shift	0.83	0.22	0.24	0.78	0.64	0.36478
Liver Enhancers	Fdam (Damaraland mole-rat)	82.5% under null, 17.5% with a branch shift	0.85	0.23	0.23	0.79	0.58	0.421538
Heart Enhancers	Fdam (Damaraland mole-rat)	95% under null, 5% with a branch shift	0.88	0.19	0.21	0.86	0.83	0.172996
Heart Enhancers	Fdam (Damaraland mole-rat)	92.5% under null, 7.5% with a branch shift	0.91	0.18	0.19	0.89	0.73	0.271255
Heart Enhancers	Fdam (Damaraland mole-rat)	90% under null, 10% with a branch shift	0.92	0.15	0.15	0.89	0.61	0.390135
Heart Enhancers	Fdam (Damaraland mole-rat)	87.5% under null, 12.5% with a branch shift	0.88	0.26	0.29	0.9	0.69	0.307065
Heart Enhancers	Fdam (Damaraland mole-rat)	85% under null, 15% with a branch shift	0.87	0.22	0.24	0.87	0.62	0.383481
Heart Enhancers	Fdam (Damaraland mole-rat)	82.5% under null, 17.5% with a branch shift	0.89	0.16	0.16	0.78	0.49	0.513109

## Sheet: TABLE S2B
Elements set	Branch with shift	simulation settings	alpha significance level	Threshold on shift value	AUC value	False positive rate	True positive rate (Recall)	False discovery rate	Precision
Liver Promoters	ancestral mole-rats	95% under null, 5% with a branch shift	0.2	1.5	0.9	0.07	0.84	0.62	0.378378
Liver Promoters	ancestral mole-rats	92.5% under null, 7.5% with a branch shift	0.2	1.5	0.92	0.07	0.87	0.51	0.488722
Liver Promoters	ancestral mole-rats	90% under null, 10% with a branch shift	0.2	1.5	0.91	0.08	0.88	0.46	0.536585
Liver Promoters	ancestral mole-rats	87.5% under null, 12.5% with a branch shift	0.2	1.5	0.92	0.08	0.87	0.4	0.60221
Liver Promoters	ancestral mole-rats	85% under null, 15% with a branch shift	0.2	1.5	0.9	0.06	0.84	0.29	0.711864
Liver Promoters	ancestral mole-rats	82.5% under null, 17.5% with a branch shift	0.2	1.5	0.91	0.06	0.82	0.25	0.752632
Heart Promoters	ancestral mole-rats	95% under null, 5% with a branch shift	0.2	1.5	0.93	0.06	0.88	0.55	0.44898
Heart Promoters	ancestral mole-rats	92.5% under null, 7.5% with a branch shift	0.2	1.5	0.94	0.05	0.89	0.43	0.57265
Heart Promoters	ancestral mole-rats	90% under null, 10% with a branch shift	0.2	1.5	0.94	0.05	0.9	0.34	0.661765
Heart Promoters	ancestral mole-rats	87.5% under null, 12.5% with a branch shift	0.2	1.5	0.92	0.06	0.86	0.33	0.670807
Heart Promoters	ancestral mole-rats	85% under null, 15% with a branch shift	0.2	1.5	0.93	0.05	0.87	0.24	0.757225
Heart Promoters	ancestral mole-rats	82.5% under null, 17.5% with a branch shift	0.2	1.5	0.92	0.07	0.87	0.27	0.732057
Liver Enhancers	ancestral mole-rats	95% under null, 5% with a branch shift	0.2	1.5	0.87	0.09	0.74	0.7	0.298387
Liver Enhancers	ancestral mole-rats	92.5% under null, 7.5% with a branch shift	0.2	1.5	0.91	0.11	0.85	0.6	0.395062
Liver Enhancers	ancestral mole-rats	90% under null, 10% with a branch shift	0.2	1.5	0.85	0.11	0.73	0.58	0.424419
Liver Enhancers	ancestral mole-rats	87.5% under null, 12.5% with a branch shift	0.2	1.5	0.87	0.11	0.82	0.48	0.520408
Liver Enhancers	ancestral mole-rats	85% under null, 15% with a branch shift	0.2	1.5	0.86	0.11	0.75	0.42	0.579487
Liver Enhancers	ancestral mole-rats	82.5% under null, 17.5% with a branch shift	0.2	1.5	0.87	0.09	0.73	0.36	0.64
Heart Enhancers	ancestral mole-rats	95% under null, 5% with a branch shift	0.2	1.5	0.91	0.08	0.84	0.65	0.35
Heart Enhancers	ancestral mole-rats	92.5% under null, 7.5% with a branch shift	0.2	1.5	0.89	0.08	0.79	0.56	0.437037
Heart Enhancers	ancestral mole-rats	90% under null, 10% with a branch shift	0.2	1.5	0.91	0.07	0.84	0.41	0.587413
Heart Enhancers	ancestral mole-rats	87.5% under null, 12.5% with a branch shift	0.2	1.5	0.89	0.08	0.82	0.41	0.588571
Heart Enhancers	ancestral mole-rats	85% under null, 15% with a branch shift	0.2	1.5	0.9	0.07	0.8	0.34	0.659341
Heart Enhancers	ancestral mole-rats	82.5% under null, 17.5% with a branch shift	0.2	1.5	0.89	0.08	0.84	0.32	0.680556
Liver Promoters	Hgla (naked mole-rat)	95% under null, 5% with a branch shift	0.2	1.5	0.85	0.1	0.72	0.72	0.28
Liver Promoters	Hgla (naked mole-rat)	92.5% under null, 7.5% with a branch shift	0.2	1.5	0.91	0.08	0.79	0.54	0.46
Liver Promoters	Hgla (naked mole-rat)	90% under null, 10% with a branch shift	0.2	1.5	0.87	0.1	0.74	0.54	0.46
Liver Promoters	Hgla (naked mole-rat)	87.5% under null, 12.5% with a branch shift	0.2	1.5	0.92	0.09	0.81	0.44	0.56
Liver Promoters	Hgla (naked mole-rat)	85% under null, 15% with a branch shift	0.2	1.5	0.85	0.1	0.67	0.45	0.55
Liver Promoters	Hgla (naked mole-rat)	82.5% under null, 17.5% with a branch shift	0.2	1.5	0.91	0.1	0.82	0.36	0.64
Heart Promoters	Hgla (naked mole-rat)	95% under null, 5% with a branch shift	0.2	1.5	0.93	0.09	0.92	0.65	0.35
Heart Promoters	Hgla (naked mole-rat)	92.5% under null, 7.5% with a branch shift	0.2	1.5	0.92	0.08	0.88	0.52	0.48
Heart Promoters	Hgla (naked mole-rat)	90% under null, 10% with a branch shift	0.2	1.5	0.9	0.09	0.85	0.5	0.5
Heart Promoters	Hgla (naked mole-rat)	87.5% under null, 12.5% with a branch shift	0.2	1.5	0.88	0.07	0.78	0.4	0.6
Heart Promoters	Hgla (naked mole-rat)	85% under null, 15% with a branch shift	0.2	1.5	0.89	0.08	0.8	0.37	0.63
Heart Promoters	Hgla (naked mole-rat)	82.5% under null, 17.5% with a branch shift	0.2	1.5	0.9	0.09	0.85	0.34	0.66
Liver Enhancers	Hgla (naked mole-rat)	95% under null, 5% with a branch shift	0.2	1.5	0.82	0.12	0.64	0.78	0.22
Liver Enhancers	Hgla (naked mole-rat)	92.5% under null, 7.5% with a branch shift	0.2	1.5	0.87	0.1	0.69	0.63	0.37
Liver Enhancers	Hgla (naked mole-rat)	90% under null, 10% with a branch shift	0.2	1.5	0.83	0.12	0.64	0.62	0.38
Liver Enhancers	Hgla (naked mole-rat)	87.5% under null, 12.5% with a branch shift	0.2	1.5	0.87	0.11	0.74	0.52	0.48
Liver Enhancers	Hgla (naked mole-rat)	85% under null, 15% with a branch shift	0.2	1.5	0.82	0.13	0.61	0.55	0.45
Liver Enhancers	Hgla (naked mole-rat)	82.5% under null, 17.5% with a branch shift	0.2	1.5	0.86	0.12	0.7	0.45	0.55
Heart Enhancers	Hgla (naked mole-rat)	95% under null, 5% with a branch shift	0.2	1.5	0.91	0.14	0.86	0.75	0.25
Heart Enhancers	Hgla (naked mole-rat)	92.5% under null, 7.5% with a branch shift	0.2	1.5	0.88	0.13	0.83	0.66	0.34
Heart Enhancers	Hgla (naked mole-rat)	90% under null, 10% with a branch shift	0.2	1.5	0.87	0.13	0.78	0.59	0.41
Heart Enhancers	Hgla (naked mole-rat)	87.5% under null, 12.5% with a branch shift	0.2	1.5	0.86	0.09	0.73	0.47	0.53
Heart Enhancers	Hgla (naked mole-rat)	85% under null, 15% with a branch shift	0.2	1.5	0.86	0.11	0.76	0.45	0.55
Heart Enhancers	Hgla (naked mole-rat)	82.5% under null, 17.5% with a branch shift	0.2	1.5	0.87	0.12	0.78	0.43	0.57
Liver Promoters	Fdam (Damaraland mole-rat)	95% under null, 5% with a branch shift	0.2	1.5	0.88	0.11	0.8	0.72	0.28
Liver Promoters	Fdam (Damaraland mole-rat)	92.5% under null, 7.5% with a branch shift	0.2	1.5	0.9	0.11	0.83	0.61	0.39
Liver Promoters	Fdam (Damaraland mole-rat)	90% under null, 10% with a branch shift	0.2	1.5	0.87	0.11	0.81	0.56	0.44
Liver Promoters	Fdam (Damaraland mole-rat)	87.5% under null, 12.5% with a branch shift	0.2	1.5	0.86	0.09	0.76	0.45	0.55
Liver Promoters	Fdam (Damaraland mole-rat)	85% under null, 15% with a branch shift	0.2	1.5	0.88	0.09	0.77	0.4	0.6
Liver Promoters	Fdam (Damaraland mole-rat)	82.5% under null, 17.5% with a branch shift	0.2	1.5	0.88	0.09	0.77	0.36	0.64
Heart Promoters	Fdam (Damaraland mole-rat)	95% under null, 5% with a branch shift	0.2	1.5	0.88	0.08	0.82	0.64	0.36
Heart Promoters	Fdam (Damaraland mole-rat)	92.5% under null, 7.5% with a branch shift	0.2	1.5	0.92	0.07	0.88	0.51	0.49
Heart Promoters	Fdam (Damaraland mole-rat)	90% under null, 10% with a branch shift	0.2	1.5	0.94	0.09	0.91	0.48	0.52
Heart Promoters	Fdam (Damaraland mole-rat)	87.5% under null, 12.5% with a branch shift	0.2	1.5	0.91	0.08	0.86	0.41	0.59
Heart Promoters	Fdam (Damaraland mole-rat)	85% under null, 15% with a branch shift	0.2	1.5	0.89	0.1	0.84	0.39	0.61
Heart Promoters	Fdam (Damaraland mole-rat)	82.5% under null, 17.5% with a branch shift	0.2	1.5	0.91	0.08	0.86	0.3	0.7
Liver Enhancers	Fdam (Damaraland mole-rat)	95% under null, 5% with a branch shift	0.2	1.5	0.85	0.13	0.66	0.79	0.21
Liver Enhancers	Fdam (Damaraland mole-rat)	92.5% under null, 7.5% with a branch shift	0.2	1.5	0.86	0.14	0.73	0.7	0.3
Liver Enhancers	Fdam (Damaraland mole-rat)	90% under null, 10% with a branch shift	0.2	1.5	0.84	0.14	0.71	0.64	0.36
Liver Enhancers	Fdam (Damaraland mole-rat)	87.5% under null, 12.5% with a branch shift	0.2	1.5	0.82	0.12	0.67	0.56	0.44
Liver Enhancers	Fdam (Damaraland mole-rat)	85% under null, 15% with a branch shift	0.2	1.5	0.84	0.13	0.69	0.52	0.48
Liver Enhancers	Fdam (Damaraland mole-rat)	82.5% under null, 17.5% with a branch shift	0.2	1.5	0.84	0.12	0.7	0.45	0.55
Heart Enhancers	Fdam (Damaraland mole-rat)	95% under null, 5% with a branch shift	0.2	1.5	0.87	0.1	0.8	0.71	0.29
Heart Enhancers	Fdam (Damaraland mole-rat)	92.5% under null, 7.5% with a branch shift	0.2	1.5	0.89	0.1	0.8	0.59	0.41
Heart Enhancers	Fdam (Damaraland mole-rat)	90% under null, 10% with a branch shift	0.2	1.5	0.91	0.11	0.88	0.52	0.48
Heart Enhancers	Fdam (Damaraland mole-rat)	87.5% under null, 12.5% with a branch shift	0.2	1.5	0.86	0.12	0.76	0.52	0.48
Heart Enhancers	Fdam (Damaraland mole-rat)	85% under null, 15% with a branch shift	0.2	1.5	0.85	0.13	0.75	0.49	0.51
Heart Enhancers	Fdam (Damaraland mole-rat)	82.5% under null, 17.5% with a branch shift	0.2	1.5	0.87	0.11	0.8	0.4	0.6
