# Supplementary material for: Phylogenetic modeling of enhancer shifts in African mole-rats reveals regulatory changes associated with tissue-specific traits
Source: HighWire-hosted journal article supplement (doi:10.1101/gr.277715.123), 2023-08-25
Supplement: Supplemental_Table_S3.xlsx [file Supplemental_Table_S3.xlsx]

## Sheet: Enriched genes
Supplemental Table S3. Genes associated to enhancers with an activity shift in the ancestral mole-rat branch. The ‘Enriched genes’ table reports, for each element set, the genes significantly associated to enhancers with an activity shift in the ancestral mole-rat branch (GREAT enrichment tests using the DMR genome, Methods). Gene names were transferred from mouse orthologs using orthologies from…
Element set	Shift direction	Gene name	Enrichment	# foreground regions	# background regions	BH corrected p-value
Liver enhancers	up	Bcor	4.1682	28	90	1.1e-07
Liver enhancers	up	Mid1ip1	4.07758	21	69	2.3e-05
Liver enhancers	up	Auts2	7.44321	10	18	0.000125
Liver enhancers	up	Tbl1xr1	4.56742	15	44	0.000243
Liver enhancers	up	Kcnmb2	5.54391	12	29	0.000258
Liver enhancers	up	Auts2	5.18623	12	31	0.000508
Liver enhancers	up	Cd82	5.7419	9	21	0.00369
Liver enhancers	up	Tspan18	5.48091	9	22	0.00511
Liver enhancers	up	Kcnj2	4.78492	10	28	0.00624
Liver enhancers	up	Echdc3	8.03866	6	10	0.00787
Liver enhancers	up	Apmap	13.3978	4	4	0.00798
Liver enhancers	up	Msrb2	3.62856	13	48	0.00826
Liver enhancers	up	ENSFDAG00000016738	6.25229	7	15	0.0105
Liver enhancers	up	Nampt	5.35911	8	20	0.0108
Liver enhancers	up	Dok4	7.30788	6	11	0.0108
Liver enhancers	up	Cep120	5.86153	7	16	0.0142
Liver enhancers	up	Pkn2	4.05993	10	33	0.0165
Liver enhancers	up	Abhd12b	6.69889	6	12	0.0169
Liver enhancers	up	Nuak1	4.87192	8	22	0.0176
Liver enhancers	up	1500009L16Rik	5.51673	7	17	0.018
Liver enhancers	up	S100a5	10.7182	4	5	0.018
Liver enhancers	up	S100a4	10.7182	4	5	0.018
Liver enhancers	up	Fuom	10.7182	4	5	0.018
Liver enhancers	up	Fggy	2.87095	15	70	0.02
Liver enhancers	up	Pik3cg	4.01933	9	30	0.0243
Liver enhancers	up	Etl4	2.93076	14	64	0.0243
Liver enhancers	up	Atg7	4.46592	8	24	0.0243
Liver enhancers	up	Vgll4	4.46592	8	24	0.0243
Liver enhancers	up	Jun	3.15242	12	51	0.0281
Liver enhancers	up	Cep164	4.93602	7	19	0.0281
Liver enhancers	up	Tada2a	8.93185	4	6	0.0324
Liver enhancers	up	Vrk1	13.3978	3	3	0.0324
Liver enhancers	up	Ank	3.76812	9	32	0.0324
Liver enhancers	up	Scaf4	8.93185	4	6	0.0324
Liver enhancers	up	Arhgap28	4.68922	7	20	0.0324
Liver enhancers	up	Il1f10	6.69889	5	10	0.0324
Liver enhancers	up	Polr2c	8.93185	4	6	0.0324
Liver enhancers	up	Aldh1a3	5.35911	6	15	0.0347
Liver enhancers	up	Asb7	5.35911	6	15	0.0347
Liver enhancers	up	Cdkn3	4.46592	7	21	0.0404
Liver enhancers	up	Dscaml1	4.46592	7	21	0.0404
Liver enhancers	down	Cytip	14.1826	6	6	0.000338
Liver enhancers	down	Ermn	14.1826	5	5	0.00228
Liver enhancers	down	Pde1a	7.56404	8	15	0.00228
Liver enhancers	down	Dis3l	14.1826	4	4	0.017
Liver enhancers	down	Rnf182	10.1304	5	7	0.0179
Liver enhancers	down	Evi2	8.86411	5	8	0.0374
Liver enhancers	down	Apcs	9.45505	4	6	0.0387
Liver enhancers	down	Arid5b	3.46685	11	45	0.0387
Liver enhancers	down	Cabcoco1	3.31933	11	47	0.0387
Liver enhancers	down	Ttc8	7.09129	5	10	0.0387
Liver enhancers	down	Ighg1	14.1826	3	3	0.0387
Liver enhancers	down	Slc30a5	3.63656	10	39	0.0387
Liver enhancers	down	Smagp	14.1826	3	3	0.0387
Liver enhancers	down	Gm21970	7.87921	5	9	0.0387
Liver enhancers	down	Ifnar1	9.45505	4	6	0.0387
Liver enhancers	down	Fign	4.72753	8	24	0.0387
Liver enhancers	down	Nfe2l2	6.07825	6	14	0.0387
Liver enhancers	down	Agps	5.67303	6	15	0.0387
Liver enhancers	down	Mertk	6.07825	6	14	0.0387
Liver enhancers	down	Ccm2l	11.3461	4	5	0.0387
Liver enhancers	down	Ptpn1	5.22516	7	19	0.0387
Liver enhancers	down	Uox	7.09129	5	10	0.0387
Liver enhancers	down	Gys2	9.45505	4	6	0.0387
Liver enhancers	down	Lpl	14.1826	3	3	0.0387
Liver enhancers	down	Ets1	2.70144	16	84	0.0387
Liver enhancers	down	Rab11fip4	4.20225	8	27	0.0423
Liver enhancers	down	Pik3r1	2.75772	14	72	0.0455
Liver enhancers	down	Myo18a	5.31847	6	16	0.0483
Liver enhancers	down	Psme3ip1	4.05216	8	28	0.0483
Liver enhancers	down	Tmem87b	5.31847	6	16	0.0483
Liver enhancers	down	P2ry14	6.44663	5	11	0.0483
Liver enhancers	down	Fli1	3.64695	9	35	0.0483
Enhancers Heart	up	Nebl	4.77817	17	39	1.7e-05
Enhancers Heart	up	Etl4	3.60384	24	73	1.7e-05
Enhancers Heart	up	ENSFDAG00000014441	3.96889	21	58	1.7e-05
Enhancers Heart	up	Adar	6.34624	11	19	0.000107
Enhancers Heart	up	Msrb2	3.96487	17	47	0.000242
Enhancers Heart	up	Fosl2	3.42553	20	64	0.000301
Enhancers Heart	up	Enox1	3.6539	18	54	0.000323
Enhancers Heart	up	Ccdc122	4.59684	13	31	0.00046
Enhancers Heart	up	Babam2	3.5234	18	56	0.00046
Enhancers Heart	up	Ppargc1a	2.79635	25	98	0.000487
Enhancers Heart	up	Rras2	4.01037	15	41	0.000487
Enhancers Heart	up	Kcnn3	6.16595	9	16	0.000723
Enhancers Heart	up	Spon1	4.03852	14	38	0.000768
Enhancers Heart	up	Marchf3	3.98607	12	33	0.00421
Enhancers Heart	up	Thrb	3.28851	15	50	0.00529
Enhancers Heart	up	Gm32717	5.90245	7	13	0.00963
Enhancers Heart	up	Runx2	5.90245	7	13	0.00963
Enhancers Heart	up	Mapk4	5.15844	8	17	0.00963
Enhancers Heart	up	Rbfox1	3.55514	12	37	0.0105
Enhancers Heart	up	Lancl2	10.9617	4	4	0.0105
Enhancers Heart	up	Chrna10	10.9617	4	4	0.0105
Enhancers Heart	up	Dtd1	4.87186	8	18	0.013
Enhancers Heart	up	Fhip1a	3.94621	9	25	0.0315
Enhancers Heart	up	Atpaf2	5.48085	6	12	0.0345
Enhancers Heart	up	Rcvrn	6.85106	5	8	0.0345
Enhancers Heart	up	Max	3.79443	9	26	0.0345
Enhancers Heart	up	Nck1	8.76935	4	5	0.0345
Enhancers Heart	up	ENSFDAG00000013519	6.85106	5	8	0.0345
Enhancers Heart	up	Crh	8.76935	4	5	0.0345
Enhancers Heart	up	Vopp1	8.76935	4	5	0.0345
Enhancers Heart	up	Rarb	2.74042	14	56	0.0402
Enhancers Heart	up	Rab15	4.51364	7	17	0.0442
Enhancers Heart	down	Phyhipl	5.66624	13	32	0.000344
Enhancers Heart	down	Prkar2a	5.00686	14	39	0.000352
Enhancers Heart	down	Anapc1	5.57907	12	30	0.000432
Enhancers Heart	down	Bicc1	5.2905	11	29	0.00183
Enhancers Heart	down	Tmprss13	10.4608	6	8	0.00188
Enhancers Heart	down	Bcl2l11	4.64922	12	36	0.00208
Enhancers Heart	down	Lnx1	4.02933	13	45	0.00397
Enhancers Heart	down	Kcnj8	7.51028	7	13	0.00397
Enhancers Heart	down	Ttc28	5.45778	9	23	0.00501
Enhancers Heart	down	Gucd1	9.96262	5	7	0.00989
Enhancers Heart	down	Upb1	6.97384	6	12	0.0207
Enhancers Heart	down	Pou2f3	8.71729	5	8	0.0207
Enhancers Heart	down	Arhgef3	4.85136	8	23	0.0257
Enhancers Heart	down	Tlcd5	11.1581	4	5	0.0257
Enhancers Heart	down	Cenpi	7.74871	5	9	0.0328
Enhancers Heart	down	Dnm3	4.1843	9	30	0.0328
Enhancers Heart	down	Kcnt2	13.9477	3	3	0.0343
Enhancers Heart	down	Sgsm2	13.9477	3	3	0.0343
Enhancers Heart	down	Icam2	13.9477	3	3	0.0343
Enhancers Heart	down	Ston2	6.97384	5	10	0.0343
Enhancers Heart	down	F2r	9.29845	4	6	0.0343
Enhancers Heart	down	Iqgap2	9.29845	4	6	0.0343
Enhancers Heart	down	Prss51	5.57907	6	15	0.0343
Enhancers Heart	down	1700088E04Rik	13.9477	3	3	0.0343
Enhancers Heart	down	Atp5j	13.9477	3	3	0.0343
Enhancers Heart	down	Man2a1	4.29159	8	26	0.0343
Enhancers Heart	down	Tmem232	4.46325	8	25	0.0343
Enhancers Heart	down	Plekhh2	6.97384	5	10	0.0343
Enhancers Heart	down	Ccdc68	2.78953	14	70	0.0343
Enhancers Heart	down	Pla2g2e	13.9477	3	3	0.0343
Enhancers Heart	down	Chic2	4.46325	8	25	0.0343
Enhancers Heart	down	Nod1	9.29845	4	6	0.0343
Enhancers Heart	down	Niban1	5.23038	6	16	0.0478
Enhancers Heart	down	Fam13c	5.23038	6	16	0.0478
Enhancers Heart	down	Fsd1l	6.33985	5	11	0.0487

## Sheet: Enhancers Liver UP genes all
Ensembl gene id (Fdam)	Gene name	Enhancers Liver UP
ENSFDAG00000007428	Rb1cc1	Enhancers_Liver_30
ENSFDAG00000008113	St18	Enhancers_Liver_41
ENSFDAG00000008405	Pcmtd1	Enhancers_Liver_41
ENSFDAG00000006845	Sgk3	Enhancers_Liver_68
ENSFDAG00000012030	Mcmdc2	Enhancers_Liver_68
ENSFDAG00000012448	Cpa6	Enhancers_Liver_83,Enhancers_Liver_94
ENSFDAG00000002353	Prex2	Enhancers_Liver_83,Enhancers_Liver_94
ENSFDAG00000001537	Prdm14	Enhancers_Liver_106,Enhancers_Liver_107,Enhancers_Liver_112
ENSFDAG00000019085	Ncoa2	Enhancers_Liver_106,Enhancers_Liver_107,Enhancers_Liver_112
ENSFDAG00000009317	Hmgb1	Enhancers_Liver_152,Enhancers_Liver_155,Enhancers_Liver_156
ENSFDAG00000015214	Tram1	Enhancers_Liver_152,Enhancers_Liver_155,Enhancers_Liver_156
ENSFDAG00000011353	Xkr9	Enhancers_Liver_175
ENSFDAG00000006268	Eya1	Enhancers_Liver_175
ENSFDAG00000021316	Srsf10	Enhancers_Liver_53113
ENSFDAG00000000068	Tmem30a	Enhancers_Liver_299,Enhancers_Liver_300,Enhancers_Liver_301
ENSFDAG00000002495	Kcnq5	Enhancers_Liver_299,Enhancers_Liver_300,Enhancers_Liver_301
ENSFDAG00000000475	N.A	Enhancers_Liver_354
ENSFDAG00000008616	Col19a1	Enhancers_Liver_354
ENSFDAG00000009792	Lmbrd1	Enhancers_Liver_362
ENSFDAG00000013391	Adgrb3	Enhancers_Liver_362
ENSFDAG00000013846	Tle1	Enhancers_Liver_59698,Enhancers_Liver_59714,Enhancers_Liver_59724
ENSFDAG00000014876	Phf3	Enhancers_Liver_383,Enhancers_Liver_385
ENSFDAG00000010604	Ptp4a1	Enhancers_Liver_392,Enhancers_Liver_402,Enhancers_Liver_414
ENSFDAG00000008941	Khdrbs2	Enhancers_Liver_402,Enhancers_Liver_414
ENSFDAG00000021115	Arid5a	Enhancers_Liver_50631
ENSFDAG00000013797	Npas2	Enhancers_Liver_628,Enhancers_Liver_629
ENSFDAG00000010515	Pdcl3	Enhancers_Liver_628,Enhancers_Liver_629
ENSFDAG00000010208	N.A	Enhancers_Liver_643,Enhancers_Liver_646,Enhancers_Liver_648,Enhancers_Liver_650
ENSFDAG00000005643	Tbc1d8	Enhancers_Liver_643,Enhancers_Liver_646,Enhancers_Liver_648,Enhancers_Liver_650
ENSFDAG00000005275	Rfx8	Enhancers_Liver_706
ENSFDAG00000007551	Map4k4	Enhancers_Liver_706
ENSFDAG00000004645	Mrps9	Enhancers_Liver_787,Enhancers_Liver_788
ENSFDAG00000018413	Tgfbrap1	Enhancers_Liver_787,Enhancers_Liver_788
ENSFDAG00000020344	Mettl21e	Enhancers_Liver_79281
ENSFDAG00000005041	Slc10a2	Enhancers_Liver_79281
ENSFDAG00000015224	Slc40a1	Enhancers_Liver_1076
ENSFDAG00000011855	Larp7	Enhancers_Liver_1076
ENSFDAG00000016631	Slc39a10	Enhancers_Liver_910
ENSFDAG00000011213	Dnah7c	Enhancers_Liver_1079,Enhancers_Liver_910
ENSFDAG00000010986	Stat1	Enhancers_Liver_1013
ENSFDAG00000012945	Gls	Enhancers_Liver_1013
ENSFDAG00000012252	Nemp2	Enhancers_Liver_1045
ENSFDAG00000010146	Mfsd6	Enhancers_Liver_1045,Enhancers_Liver_1054
ENSFDAG00000007051	Inpp1	Enhancers_Liver_1054
ENSFDAG00000011096	Stk17b	Enhancers_Liver_1079,Enhancers_Liver_1092,Enhancers_Liver_1098
ENSFDAG00000012744	Hecw2	Enhancers_Liver_1092,Enhancers_Liver_1098
ENSFDAG00000011677	Ankrd44	Enhancers_Liver_1172
ENSFDAG00000017510	Sf3b1	Enhancers_Liver_1172
ENSFDAG00000009242	Htra1	Enhancers_Liver_78548
ENSFDAG00000000432	Plekha1	Enhancers_Liver_78548
ENSFDAG00000002315	Tut7	Enhancers_Liver_23029,Enhancers_Liver_23045,Enhancers_Liver_23058
ENSFDAG00000016479	Dapk1	Enhancers_Liver_23029,Enhancers_Liver_23045,Enhancers_Liver_23058
ENSFDAG00000007588	Icos	Enhancers_Liver_1443,Enhancers_Liver_1462,Enhancers_Liver_1463
ENSFDAG00000020895	Pard3b	Enhancers_Liver_1472,Enhancers_Liver_1473,Enhancers_Liver_1474,Enhancers_Liver_1475,Enhancers_Liver_1494,Enhancers_Liver_1516
ENSFDAG00000013977	S100a10	Enhancers_Liver_1472,Enhancers_Liver_1473,Enhancers_Liver_1474,Enhancers_Liver_1475
ENSFDAG00000007633	Nrp2	Enhancers_Liver_1494,Enhancers_Liver_1516,Enhancers_Liver_1533
ENSFDAG00000012715	Ino80d	Enhancers_Liver_1533
ENSFDAG00000009173	Ldha	Enhancers_Liver_1626,Enhancers_Liver_1627
ENSFDAG00000016337	Creb1	Enhancers_Liver_1626,Enhancers_Liver_1627
ENSFDAG00000008784	Ccnyl1	Enhancers_Liver_1650,Enhancers_Liver_1684
ENSFDAG00000012647	Plekhm3	Enhancers_Liver_1650,Enhancers_Liver_1684
ENSFDAG00000011174	Idh1	Enhancers_Liver_1692
ENSFDAG00000010994	D630023F18Rik	Enhancers_Liver_1692
ENSFDAG00000019300	Mtx2	Enhancers_Liver_49028,Enhancers_Liver_49029,Enhancers_Liver_49032,Enhancers_Liver_49045
ENSFDAG00000004292	Fth1	Enhancers_Liver_49028,Enhancers_Liver_49029,Enhancers_Liver_49032,Enhancers_Liver_49045,Enhancers_Liver_49078
ENSFDAG00000020230	Pecr	Enhancers_Liver_1818
ENSFDAG00000004638	Rpl37a	Enhancers_Liver_1832
ENSFDAG00000010390	Igfbp2	Enhancers_Liver_1832
ENSFDAG00000004499	Igfbp5	Enhancers_Liver_1856
ENSFDAG00000005119	N.A	Enhancers_Liver_1856,Enhancers_Liver_1866
ENSFDAG00000002175	Tns1	Enhancers_Liver_1866,Enhancers_Liver_1928
ENSFDAG00000013870	Ttll4	Enhancers_Liver_2011,Enhancers_Liver_2015
ENSFDAG00000015645	Stk36	Enhancers_Liver_2011,Enhancers_Liver_2015
ENSFDAG00000009285	Ptprn	Enhancers_Liver_2058,Enhancers_Liver_2060,Enhancers_Liver_2061
ENSFDAG00000019596	Dnajb2	Enhancers_Liver_2058,Enhancers_Liver_2060,Enhancers_Liver_2061
ENSFDAG00000016938	Dnpep	Enhancers_Liver_2063
ENSFDAG00000000733	Slc4a3	Enhancers_Liver_2074,Enhancers_Liver_2075,Enhancers_Liver_2083,Enhancers_Liver_2085
ENSFDAG00000009308	Stk11ip	Enhancers_Liver_2074,Enhancers_Liver_2075
ENSFDAG00000007737	Epha4	Enhancers_Liver_2097
ENSFDAG00000020034	Ap1s3	Enhancers_Liver_2144
ENSFDAG00000009356	Wdfy1	Enhancers_Liver_2144
ENSFDAG00000020371	Nyap2	Enhancers_Liver_2183,Enhancers_Liver_2184,Enhancers_Liver_2189,Enhancers_Liver_2194,Enhancers_Liver_2200,Enhancers_Liver_2214,Enhancers_Liver_2220,Enhancers_Liver_2233,Enhancers_Liver_2234,Enhancers_Liver_2250
ENSFDAG00000018637	Irs1	Enhancers_Liver_2189,Enhancers_Liver_2194,Enhancers_Liver_2200,Enhancers_Liver_2214,Enhancers_Liver_2220,Enhancers_Liver_2233,Enhancers_Liver_2234,Enhancers_Liver_2250
ENSFDAG00000017605	Dner	Enhancers_Liver_2378
ENSFDAG00000016741	Trip12	Enhancers_Liver_2378
ENSFDAG00000008947	Cab39	Enhancers_Liver_2389
ENSFDAG00000015687	Itm2c	Enhancers_Liver_2389
ENSFDAG00000006656	Gpr55	Enhancers_Liver_2398,Enhancers_Liver_2399,Enhancers_Liver_2400
ENSFDAG00000012819	Spata3	Enhancers_Liver_2398,Enhancers_Liver_2399,Enhancers_Liver_2400
ENSFDAG00000000394	Nppc	Enhancers_Liver_2439
ENSFDAG00000020276	Dis3l2	Enhancers_Liver_2439,Enhancers_Liver_2455,Enhancers_Liver_2456
ENSFDAG00000015859	Akp3	Enhancers_Liver_2455,Enhancers_Liver_2456
ENSFDAG00000012107	Gigyf2	Enhancers_Liver_2488
ENSFDAG00000008446	Ngef	Enhancers_Liver_2488
ENSFDAG00000006555	Atg16l1	Enhancers_Liver_2514,Enhancers_Liver_2516
ENSFDAG00000020879	Sag	Enhancers_Liver_2514,Enhancers_Liver_2516
ENSFDAG00000000777	Arl4c	Enhancers_Liver_2640
ENSFDAG00000010051	Sh3bp4	Enhancers_Liver_2640,Enhancers_Liver_2650,Enhancers_Liver_2651
ENSFDAG00000011571	Tpx2	Enhancers_Liver_2650,Enhancers_Liver_2651
ENSFDAG00000021274	Tpx2	Enhancers_Liver_2674
ENSFDAG00000021057	Agap1	Enhancers_Liver_2674
ENSFDAG00000013194	Ackr3	Enhancers_Liver_2725,Enhancers_Liver_2731,Enhancers_Liver_2734
ENSFDAG00000010696	Cops8	Enhancers_Liver_2725,Enhancers_Liver_2731,Enhancers_Liver_2734
ENSFDAG00000021402	Crocc2	Enhancers_Liver_2861
ENSFDAG00000012380	Sned1	Enhancers_Liver_2861
ENSFDAG00000008145	Pdzph1	Enhancers_Liver_38255
ENSFDAG00000012302	Tsn	Enhancers_Liver_2940,Enhancers_Liver_3102
ENSFDAG00000021146	Nifk	Enhancers_Liver_2940,Enhancers_Liver_3102,Enhancers_Liver_3107
ENSFDAG00000011556	Phlpp1	Enhancers_Liver_3054
ENSFDAG00000005265	Kdsr	Enhancers_Liver_3054
ENSFDAG00000015193	Serpinb8	Enhancers_Liver_3079
ENSFDAG00000008359	Serpinb2	Enhancers_Liver_3079
ENSFDAG00000000042	Clasp1	Enhancers_Liver_3107
ENSFDAG00000012545	Gli2	Enhancers_Liver_3132
ENSFDAG00000017432	Inhbb	Enhancers_Liver_3132
ENSFDAG00000009230	Dpp10	Enhancers_Liver_3239,Enhancers_Liver_3240
ENSFDAG00000011490	Ubxn4	Enhancers_Liver_3329,Enhancers_Liver_3331
ENSFDAG00000016478	R3hdm1	Enhancers_Liver_3329,Enhancers_Liver_3331
ENSFDAG00000007139	Slc41a1	Enhancers_Liver_3495,Enhancers_Liver_3496
ENSFDAG00000021550	Rab29	Enhancers_Liver_3496
ENSFDAG00000000222	Slc45a3	Enhancers_Liver_3516
ENSFDAG00000009288	Nucks1	Enhancers_Liver_3516
ENSFDAG00000004146	Plekha6	Enhancers_Liver_3608,Enhancers_Liver_3609
ENSFDAG00000014047	Golt1a	Enhancers_Liver_3608,Enhancers_Liver_3609
ENSFDAG00000002095	Etnk2	Enhancers_Liver_3631
ENSFDAG00000020806	Sox13	Enhancers_Liver_3631,Enhancers_Liver_3639,Enhancers_Liver_3643
ENSFDAG00000009037	Snrpe	Enhancers_Liver_3639,Enhancers_Liver_3643
ENSFDAG00000010420	Dennd1b	Enhancers_Liver_3972
ENSFDAG00000005428	Crb1	Enhancers_Liver_3972
ENSFDAG00000007144	Axin1	Enhancers_Liver_36966
ENSFDAG00000011663	Niban1	Enhancers_Liver_4133,Enhancers_Liver_4134
ENSFDAG00000020552	Cenpi	Enhancers_Liver_4133,Enhancers_Liver_4134
ENSFDAG00000004285	1700025G04Rik	Enhancers_Liver_4148
ENSFDAG00000013864	Edem3	Enhancers_Liver_4148
ENSFDAG00000007373	Lamc2	Enhancers_Liver_4236,Enhancers_Liver_4237,Enhancers_Liver_4239
ENSFDAG00000015916	Nmnat2	Enhancers_Liver_4236,Enhancers_Liver_4237,Enhancers_Liver_4239
ENSFDAG00000016212	Rgs16	Enhancers_Liver_4278,Enhancers_Liver_4287,Enhancers_Liver_4288
ENSFDAG00000019777	Rgs8	Enhancers_Liver_4278,Enhancers_Liver_4287,Enhancers_Liver_4288
ENSFDAG00000008214	Abl2	Enhancers_Liver_4438,Enhancers_Liver_4439
ENSFDAG00000015713	Tor3a	Enhancers_Liver_4438,Enhancers_Liver_4439
ENSFDAG00000017245	Fam20b	Enhancers_Liver_4452
ENSFDAG00000010933	Angptl1	Enhancers_Liver_4452
ENSFDAG00000006864	Tex35	Enhancers_Liver_4502
ENSFDAG00000016960	Rasal2	Enhancers_Liver_4502
ENSFDAG00000009614	Sec16b	Enhancers_Liver_4524,Enhancers_Liver_4530,Enhancers_Liver_4531,Enhancers_Liver_4532,Enhancers_Liver_4534,Enhancers_Liver_4536,Enhancers_Liver_4539
ENSFDAG00000012970	Brinp2	Enhancers_Liver_4524,Enhancers_Liver_4530,Enhancers_Liver_4531,Enhancers_Liver_4532,Enhancers_Liver_4534,Enhancers_Liver_4536,Enhancers_Liver_4539
ENSFDAG00000010067	Pappa2	Enhancers_Liver_4551,Enhancers_Liver_4557,Enhancers_Liver_4558,Enhancers_Liver_4561
ENSFDAG00000002270	Astn1	Enhancers_Liver_4551,Enhancers_Liver_4557,Enhancers_Liver_4558,Enhancers_Liver_4561
ENSFDAG00000018308	Cop1	Enhancers_Liver_4568,Enhancers_Liver_4569,Enhancers_Liver_4572,Enhancers_Liver_4573
ENSFDAG00000006162	Tnr	Enhancers_Liver_4568,Enhancers_Liver_4569,Enhancers_Liver_4572,Enhancers_Liver_4573
ENSFDAG00000013303	Rc3h1	Enhancers_Liver_4616
ENSFDAG00000017392	Serpinc1	Enhancers_Liver_4616
ENSFDAG00000017742	Suco	Enhancers_Liver_4669
ENSFDAG00000017002	Pigc	Enhancers_Liver_4669,Enhancers_Liver_4674,Enhancers_Liver_4679,Enhancers_Liver_4689
ENSFDAG00000016394	Dnm3	Enhancers_Liver_4674,Enhancers_Liver_4679,Enhancers_Liver_4689
ENSFDAG00000015488	Selp	Enhancers_Liver_4747
ENSFDAG00000019049	F5	Enhancers_Liver_4747,Enhancers_Liver_4781
ENSFDAG00000021040	Slc19a2	Enhancers_Liver_4781
ENSFDAG00000015433	Atp1b1	Enhancers_Liver_4816,Enhancers_Liver_4824
ENSFDAG00000018607	Nme7	Enhancers_Liver_4816
ENSFDAG00000016485	Dpt	Enhancers_Liver_4824
ENSFDAG00000003009	Ank	Enhancers_Liver_29565,Enhancers_Liver_29566,Enhancers_Liver_29568,Enhancers_Liver_29569,Enhancers_Liver_29572,Enhancers_Liver_29588,Enhancers_Liver_29600,Enhancers_Liver_29601,Enhancers_Liver_29610
ENSFDAG00000008528	Fbxl7	Enhancers_Liver_29565,Enhancers_Liver_29566,Enhancers_Liver_29568,Enhancers_Liver_29569,Enhancers_Liver_29572
ENSFDAG00000013353	Prkab2	Enhancers_Liver_55665,Enhancers_Liver_55672,Enhancers_Liver_55673,Enhancers_Liver_55675
ENSFDAG00000018008	Pbx1	Enhancers_Liver_4965,Enhancers_Liver_4967
ENSFDAG00000008105	Lmx1a	Enhancers_Liver_4965,Enhancers_Liver_4967
ENSFDAG00000004040	Nuf2	Enhancers_Liver_5041
ENSFDAG00000008235	Lmf1	Enhancers_Liver_36934,Enhancers_Liver_36935
ENSFDAG00000004821	Gng13	Enhancers_Liver_36934,Enhancers_Liver_36935
ENSFDAG00000015185	Hsd17b7	Enhancers_Liver_5049
ENSFDAG00000000975	Ddr2	Enhancers_Liver_5049
ENSFDAG00000021064	Pcp4l1	Enhancers_Liver_5171
ENSFDAG00000012957	N.A	Enhancers_Liver_5171
ENSFDAG00000021335	Igsf9	Enhancers_Liver_5251
ENSFDAG00000011473	Slamf8	Enhancers_Liver_5275,Enhancers_Liver_5279
ENSFDAG00000012990	Crp	Enhancers_Liver_5275,Enhancers_Liver_5279
ENSFDAG00000018752	Akt3	Enhancers_Liver_5405
ENSFDAG00000015912	Zbtb18	Enhancers_Liver_5405
ENSFDAG00000007739	Ahctf1	Enhancers_Liver_5486,Enhancers_Liver_5488
ENSFDAG00000009473	Cdc42bpa	Enhancers_Liver_5486,Enhancers_Liver_5488
ENSFDAG00000002494	N.A	Enhancers_Liver_5608
ENSFDAG00000011708	Enah	Enhancers_Liver_5608,Enhancers_Liver_5619
ENSFDAG00000020469	Srp9	Enhancers_Liver_5619
ENSFDAG00000012085	Capn8	Enhancers_Liver_5673
ENSFDAG00000013157	Susd4	Enhancers_Liver_5673
ENSFDAG00000013700	Aida	Enhancers_Liver_5692,Enhancers_Liver_5693
ENSFDAG00000001241	N.A	Enhancers_Liver_5692,Enhancers_Liver_5693
ENSFDAG00000021307	Eprs	Enhancers_Liver_5810,Enhancers_Liver_5811,Enhancers_Liver_5819,Enhancers_Liver_5821
ENSFDAG00000007320	Lyplal1	Enhancers_Liver_5810,Enhancers_Liver_5811,Enhancers_Liver_5819,Enhancers_Liver_5821,Enhancers_Liver_5831,Enhancers_Liver_5841,Enhancers_Liver_5853,Enhancers_Liver_5856
ENSFDAG00000012435	Tgfb2	Enhancers_Liver_5831,Enhancers_Liver_5841,Enhancers_Liver_5853,Enhancers_Liver_5856
ENSFDAG00000003286	Esrrg	Enhancers_Liver_5890
ENSFDAG00000016090	Ush2a	Enhancers_Liver_5890
ENSFDAG00000018497	Vash2	Enhancers_Liver_5982
ENSFDAG00000008216	Lpgat1	Enhancers_Liver_6064
ENSFDAG00000018077	Plxna2	Enhancers_Liver_6203,Enhancers_Liver_6219,Enhancers_Liver_6220,Enhancers_Liver_6225
ENSFDAG00000020775	Cd34	Enhancers_Liver_6219,Enhancers_Liver_6220,Enhancers_Liver_6225,Enhancers_Liver_6266
ENSFDAG00000017165	Cr1l	Enhancers_Liver_6266
ENSFDAG00000009302	Iyd	Enhancers_Liver_6297
ENSFDAG00000018103	Mthfd1l	Enhancers_Liver_6330,Enhancers_Liver_6334
ENSFDAG00000005814	Akap12	Enhancers_Liver_6330,Enhancers_Liver_6334
ENSFDAG00000000201	Ccdc170	Enhancers_Liver_6371
ENSFDAG00000019132	Esr1	Enhancers_Liver_6371,Enhancers_Liver_6408
ENSFDAG00000016136	N.A	Enhancers_Liver_6408
ENSFDAG00000015788	N.A	Enhancers_Liver_6426
ENSFDAG00000015902	N.A	Enhancers_Liver_6426
ENSFDAG00000011346	Oprm1	Enhancers_Liver_6458,Enhancers_Liver_6460
ENSFDAG00000014723	Ipcef1	Enhancers_Liver_6458,Enhancers_Liver_6460
ENSFDAG00000000859	Ust	Enhancers_Liver_6541,Enhancers_Liver_6543,Enhancers_Liver_6556
ENSFDAG00000017132	Gnrh1	Enhancers_Liver_27711,Enhancers_Liver_27728,Enhancers_Liver_27729
ENSFDAG00000017465	Dock5	Enhancers_Liver_27711,Enhancers_Liver_27728,Enhancers_Liver_27729
ENSFDAG00000005242	Sash1	Enhancers_Liver_6541,Enhancers_Liver_6543,Enhancers_Liver_6556,Enhancers_Liver_6594
ENSFDAG00000017156	Samd5	Enhancers_Liver_6594
ENSFDAG00000010757	Eya4	Enhancers_Liver_7193
ENSFDAG00000009028	Tnfaip3	Enhancers_Liver_6925,Enhancers_Liver_6949
ENSFDAG00000016541	Perp	Enhancers_Liver_6925
ENSFDAG00000010015	Il22ra2	Enhancers_Liver_6949
ENSFDAG00000003960	Map3k5	Enhancers_Liver_7004,Enhancers_Liver_7008,Enhancers_Liver_7011
ENSFDAG00000008966	Map7	Enhancers_Liver_7004,Enhancers_Liver_7008,Enhancers_Liver_7011
ENSFDAG00000018815	Mtfr2	Enhancers_Liver_7041,Enhancers_Liver_7043,Enhancers_Liver_7067
ENSFDAG00000020411	Pde7b	Enhancers_Liver_7041,Enhancers_Liver_7043,Enhancers_Liver_7067,Enhancers_Liver_7073
ENSFDAG00000019079	Aldh8a1	Enhancers_Liver_7132
ENSFDAG00000005816	Rpl36a	Enhancers_Liver_7132
ENSFDAG00000007924	Rps12	Enhancers_Liver_7193
ENSFDAG00000019094	Moxd1	Enhancers_Liver_7273,Enhancers_Liver_7276,Enhancers_Liver_7277,Enhancers_Liver_7281
ENSFDAG00000014619	Enpp1	Enhancers_Liver_7273,Enhancers_Liver_7276,Enhancers_Liver_7277,Enhancers_Liver_7281
ENSFDAG00000014743	Smlr1	Enhancers_Liver_7364,Enhancers_Liver_7366
ENSFDAG00000009064	Tmem200a	Enhancers_Liver_7364,Enhancers_Liver_7366
ENSFDAG00000010406	Arhgap18	Enhancers_Liver_7397
ENSFDAG00000006304	Ptprk	Enhancers_Liver_7440
ENSFDAG00000018289	Themis	Enhancers_Liver_7440
ENSFDAG00000016413	Tpd52l1	Enhancers_Liver_7543
ENSFDAG00000001335	Nkain2	Enhancers_Liver_7543
ENSFDAG00000006799	Frk	Enhancers_Liver_7613
ENSFDAG00000019054	Nedd8	Enhancers_Liver_7613
ENSFDAG00000006211	Ddo	Enhancers_Liver_7774
ENSFDAG00000013611	Disp3	Enhancers_Liver_63018
ENSFDAG00000015905	Pdss2	Enhancers_Liver_7909
ENSFDAG00000016859	Bend3	Enhancers_Liver_7909
ENSFDAG00000009826	N.A	Enhancers_Liver_7955
ENSFDAG00000000309	N.A	Enhancers_Liver_7955
ENSFDAG00000021074	Hace1	Enhancers_Liver_8020
ENSFDAG00000011358	Ascc3	Enhancers_Liver_8056,Enhancers_Liver_8059
ENSFDAG00000007572	Sim1	Enhancers_Liver_8056,Enhancers_Liver_8059
ENSFDAG00000007556	Dcbld1	Enhancers_Liver_8073
ENSFDAG00000007602	Gopc	Enhancers_Liver_8073
ENSFDAG00000014713	Cep85l	Enhancers_Liver_8096
ENSFDAG00000005943	Pln	Enhancers_Liver_8096
ENSFDAG00000006970	Man1a	Enhancers_Liver_8133,Enhancers_Liver_8165
ENSFDAG00000009512	Fam184a	Enhancers_Liver_8133,Enhancers_Liver_8165
ENSFDAG00000013617	Sowahc	Enhancers_Liver_8253
ENSFDAG00000017783	Man2a1	Enhancers_Liver_38366,Enhancers_Liver_38372,Enhancers_Liver_38374,Enhancers_Liver_38375,Enhancers_Liver_38379,Enhancers_Liver_38436
ENSFDAG00000014123	Tmem232	Enhancers_Liver_38436
ENSFDAG00000012611	Slc25a16	Enhancers_Liver_8455
ENSFDAG00000007467	Tet1	Enhancers_Liver_8455
ENSFDAG00000020042	Rufy2	Enhancers_Liver_8460
ENSFDAG00000008155	Hnrnph3	Enhancers_Liver_8460
ENSFDAG00000015064	Mypn	Enhancers_Liver_8487,Enhancers_Liver_8489
ENSFDAG00000015237	Pbld1	Enhancers_Liver_8487,Enhancers_Liver_8489
ENSFDAG00000019839	Magt1	Enhancers_Liver_70366
ENSFDAG00000000793	Hnrnpa2b1	Enhancers_Liver_70366
ENSFDAG00000008914	Smug1	Enhancers_Liver_32856
ENSFDAG00000003400	Reep3	Enhancers_Liver_8534,Enhancers_Liver_8536
ENSFDAG00000011063	N.A	Enhancers_Liver_8534,Enhancers_Liver_8536
ENSFDAG00000003292	Rhobtb1	Enhancers_Liver_8727
ENSFDAG00000003819	Cdk1	Enhancers_Liver_8727
ENSFDAG00000005711	Ank3	Enhancers_Liver_8755,Enhancers_Liver_8756,Enhancers_Liver_8757,Enhancers_Liver_8758,Enhancers_Liver_8792
ENSFDAG00000012870	Ccdc6	Enhancers_Liver_8755,Enhancers_Liver_8756,Enhancers_Liver_8757,Enhancers_Liver_8758,Enhancers_Liver_8792
ENSFDAG00000020004	Pcdh15	Enhancers_Liver_8849,Enhancers_Liver_8850
ENSFDAG00000010247	Zwint	Enhancers_Liver_8849,Enhancers_Liver_8850
ENSFDAG00000006762	Bcr	Enhancers_Liver_8866,Enhancers_Liver_8873
ENSFDAG00000013627	Specc1l	Enhancers_Liver_8866,Enhancers_Liver_8873
ENSFDAG00000020634	Lrrc75b	Enhancers_Liver_13230,Enhancers_Liver_8948
ENSFDAG00000019174	Ggt1	Enhancers_Liver_8948
ENSFDAG00000012173	S100b	Enhancers_Liver_8994
ENSFDAG00000008112	Dip2a	Enhancers_Liver_8994,Enhancers_Liver_8999
ENSFDAG00000014436	2610028H24Rik	Enhancers_Liver_8999
ENSFDAG00000014329	N.A	Enhancers_Liver_9020,Enhancers_Liver_9023
ENSFDAG00000009117	Pcbp3	Enhancers_Liver_9020,Enhancers_Liver_9023
ENSFDAG00000008633	Slc19a1	Enhancers_Liver_9031
ENSFDAG00000004953	Col18a1	Enhancers_Liver_9031
ENSFDAG00000019182	Diras1	Enhancers_Liver_9242
ENSFDAG00000007106	Slc39a3	Enhancers_Liver_9242
ENSFDAG00000003896	Cactin	Enhancers_Liver_9259
ENSFDAG00000007961	Gipc3	Enhancers_Liver_9259
ENSFDAG00000006433	Txnrd1	Enhancers_Liver_9298
ENSFDAG00000012426	1500009L16Rik	Enhancers_Liver_9328,Enhancers_Liver_9354,Enhancers_Liver_9355,Enhancers_Liver_9357,Enhancers_Liver_9359,Enhancers_Liver_9363,Enhancers_Liver_9364
ENSFDAG00000021186	Appl2	Enhancers_Liver_9328
ENSFDAG00000016131	Nuak1	Enhancers_Liver_9354,Enhancers_Liver_9355,Enhancers_Liver_9357,Enhancers_Liver_9359,Enhancers_Liver_9363,Enhancers_Liver_9364,Enhancers_Liver_9371,Enhancers_Liver_9375
ENSFDAG00000015441	Tcp11l2	Enhancers_Liver_9371,Enhancers_Liver_9375
ENSFDAG00000019233	Fbxo7	Enhancers_Liver_9447,Enhancers_Liver_9448,Enhancers_Liver_9449
ENSFDAG00000018524	Timp3	Enhancers_Liver_9447,Enhancers_Liver_9448,Enhancers_Liver_9449,Enhancers_Liver_9469
ENSFDAG00000005973	Syn3	Enhancers_Liver_9469
ENSFDAG00000003864	N.A	Enhancers_Liver_9525,Enhancers_Liver_9526
ENSFDAG00000010820	Pah	Enhancers_Liver_9525,Enhancers_Liver_9526,Enhancers_Liver_9544
ENSFDAG00000010527	Igf1	Enhancers_Liver_9544,Enhancers_Liver_9600
ENSFDAG00000005746	Pmch	Enhancers_Liver_9600
ENSFDAG00000000844	Scyl2	Enhancers_Liver_9686
ENSFDAG00000010229	Actr6	Enhancers_Liver_9686
ENSFDAG00000009960	Dnaja3	Enhancers_Liver_64930
ENSFDAG00000001445	Nmral1	Enhancers_Liver_64930
ENSFDAG00000008045	Anks1b	Enhancers_Liver_9697,Enhancers_Liver_9708
ENSFDAG00000010481	Ppp2ca	Enhancers_Liver_9708
ENSFDAG00000015862	Tmpo	Enhancers_Liver_9729,Enhancers_Liver_9730,Enhancers_Liver_9731
ENSFDAG00000006892	N.A	Enhancers_Liver_9729,Enhancers_Liver_9730,Enhancers_Liver_9731
ENSFDAG00000010190	Nudt4	Enhancers_Liver_10055,Enhancers_Liver_10064,Enhancers_Liver_10072,Enhancers_Liver_10078,Enhancers_Liver_10079,Enhancers_Liver_10080,Enhancers_Liver_10082
ENSFDAG00000000498	Eea1	Enhancers_Liver_10055,Enhancers_Liver_10064,Enhancers_Liver_10072,Enhancers_Liver_10078,Enhancers_Liver_10079,Enhancers_Liver_10080,Enhancers_Liver_10082
ENSFDAG00000020160	Poc1b	Enhancers_Liver_10228,Enhancers_Liver_10236
ENSFDAG00000008181	Dusp6	Enhancers_Liver_10228,Enhancers_Liver_10236
ENSFDAG00000004009	Tmtc2	Enhancers_Liver_10295
ENSFDAG00000018726	Ccdc59	Enhancers_Liver_10295
ENSFDAG00000014405	Ppfia2	Enhancers_Liver_10298,Enhancers_Liver_10308,Enhancers_Liver_10310
ENSFDAG00000018066	Acss3	Enhancers_Liver_10298,Enhancers_Liver_10308,Enhancers_Liver_10310
ENSFDAG00000007271	Pawr	Enhancers_Liver_10347,Enhancers_Liver_10363
ENSFDAG00000013889	Syt1	Enhancers_Liver_10347,Enhancers_Liver_10363
ENSFDAG00000013841	Csrp2	Enhancers_Liver_10407
ENSFDAG00000001738	Zdhhc17	Enhancers_Liver_10407
ENSFDAG00000017297	Phlda1	Enhancers_Liver_10454
ENSFDAG00000019270	Krr1	Enhancers_Liver_10454
ENSFDAG00000006046	Ppm1h	Enhancers_Liver_10837,Enhancers_Liver_10852,Enhancers_Liver_10886
ENSFDAG00000006734	Mon2	Enhancers_Liver_10837,Enhancers_Liver_10852,Enhancers_Liver_10886
ENSFDAG00000017289	Rpl7	Enhancers_Liver_10935
ENSFDAG00000008890	Slc16a7	Enhancers_Liver_10935,Enhancers_Liver_10943,Enhancers_Liver_10944,Enhancers_Liver_10946,Enhancers_Liver_10965,Enhancers_Liver_10975,Enhancers_Liver_10979
ENSFDAG00000008668	Lrig3	Enhancers_Liver_10943,Enhancers_Liver_10944,Enhancers_Liver_10946,Enhancers_Liver_10965,Enhancers_Liver_10975,Enhancers_Liver_10979,Enhancers_Liver_11010
ENSFDAG00000003858	Atp23	Enhancers_Liver_11010
ENSFDAG00000002546	Nemp1	Enhancers_Liver_11083
ENSFDAG00000000155	Myo1a	Enhancers_Liver_11083
ENSFDAG00000010704	Tac2	Enhancers_Liver_11084
ENSFDAG00000019541	Gpr182	Enhancers_Liver_11084
ENSFDAG00000003412	Hsd17b6	Enhancers_Liver_78469
ENSFDAG00000010784	Baz2a	Enhancers_Liver_11120
ENSFDAG00000009949	Rbms2	Enhancers_Liver_11120
ENSFDAG00000018017	Pmel	Enhancers_Liver_11176
ENSFDAG00000017128	Dgka	Enhancers_Liver_11176
ENSFDAG00000007660	Dnajc14	Enhancers_Liver_11182
ENSFDAG00000016455	Ormdl2	Enhancers_Liver_11182
ENSFDAG00000007766	Sarnp	Enhancers_Liver_11185
ENSFDAG00000017621	Gdf11	Enhancers_Liver_11185
ENSFDAG00000013485	Cd63	Enhancers_Liver_11194,Enhancers_Liver_11196
ENSFDAG00000019893	Rdh5	Enhancers_Liver_11194,Enhancers_Liver_11196
ENSFDAG00000015199	Ppp1r1a	Enhancers_Liver_32890,Enhancers_Liver_32895
ENSFDAG00000002176	N.A	Enhancers_Liver_32895
ENSFDAG00000008615	Limk2	Enhancers_Liver_11216
ENSFDAG00000011065	Pik3ip1	Enhancers_Liver_11216
ENSFDAG00000015124	Ifitm6	Enhancers_Liver_11253
ENSFDAG00000018437	B4galnt4	Enhancers_Liver_11253
ENSFDAG00000004416	Sec14l3	Enhancers_Liver_11273
ENSFDAG00000016310	Ccdc157	Enhancers_Liver_11286
ENSFDAG00000009560	Sf3a1	Enhancers_Liver_11286,Enhancers_Liver_11290
ENSFDAG00000005103	Tbc1d10a	Enhancers_Liver_11290
ENSFDAG00000014593	Lif	Enhancers_Liver_11322
ENSFDAG00000015006	Hormad2	Enhancers_Liver_11322
ENSFDAG00000009051	Kremen1	Enhancers_Liver_11407,Enhancers_Liver_11424
ENSFDAG00000006750	Tssk2	Enhancers_Liver_11407
ENSFDAG00000010794	Znrf3	Enhancers_Liver_11424
ENSFDAG00000011018	Dchs1	Enhancers_Liver_77432
ENSFDAG00000017509	Ell2	Enhancers_Liver_23404,Enhancers_Liver_23417
ENSFDAG00000018767	Glrx	Enhancers_Liver_23404,Enhancers_Liver_23417
ENSFDAG00000010462	C1d	Enhancers_Liver_11703
ENSFDAG00000020610	Etaa1	Enhancers_Liver_11703,Enhancers_Liver_11714
ENSFDAG00000012688	Meis1	Enhancers_Liver_11714
ENSFDAG00000016048	Ugp2	Enhancers_Liver_11842,Enhancers_Liver_11846
ENSFDAG00000006662	Mdh1	Enhancers_Liver_11842,Enhancers_Liver_11846
ENSFDAG00000009448	Tmem17	Enhancers_Liver_11906
ENSFDAG00000012824	B3gnt2	Enhancers_Liver_11906,Enhancers_Liver_11938
ENSFDAG00000013202	Commd1b	Enhancers_Liver_11938
ENSFDAG00000008344	Fam161a	Enhancers_Liver_11942,Enhancers_Liver_11943
ENSFDAG00000011933	Rplp0	Enhancers_Liver_11942,Enhancers_Liver_11943
ENSFDAG00000009058	Sanbr	Enhancers_Liver_11958
ENSFDAG00000016026	Pex13	Enhancers_Liver_11958
ENSFDAG00000013582	Pus10	Enhancers_Liver_11958
ENSFDAG00000010251	Rel	Enhancers_Liver_11965
ENSFDAG00000010662	Papolg	Enhancers_Liver_11965
ENSFDAG00000006493	Bcl11a	Enhancers_Liver_11990
ENSFDAG00000012522	Fancl	Enhancers_Liver_12019
ENSFDAG00000012381	Ccdc85a	Enhancers_Liver_12042
ENSFDAG00000005689	Efemp1	Enhancers_Liver_12042,Enhancers_Liver_12052
ENSFDAG00000017446	Pnpt1	Enhancers_Liver_12052
ENSFDAG00000014864	Eml6	Enhancers_Liver_12102,Enhancers_Liver_12127
ENSFDAG00000017317	Sptbn1	Enhancers_Liver_12102,Enhancers_Liver_12127
ENSFDAG00000019020	Gpr75	Enhancers_Liver_12150
ENSFDAG00000017486	Psme4	Enhancers_Liver_12150
ENSFDAG00000002327	Stc2	Enhancers_Liver_12163,Enhancers_Liver_12164
ENSFDAG00000012915	Nkx2-5	Enhancers_Liver_12163,Enhancers_Liver_12164
ENSFDAG00000018063	Bod1	Enhancers_Liver_12186
ENSFDAG00000009581	Cradd	Enhancers_Liver_12186,Enhancers_Liver_12204,Enhancers_Liver_12205
ENSFDAG00000011935	Cpeb4	Enhancers_Liver_12204,Enhancers_Liver_12205,Enhancers_Liver_12228
ENSFDAG00000012831	4930524B15Rik	Enhancers_Liver_12228
ENSFDAG00000009973	Hbq1b	Enhancers_Liver_12244
ENSFDAG00000016808	Hba-a2	Enhancers_Liver_12244
ENSFDAG00000004075	Neurl1b	Enhancers_Liver_36986,Enhancers_Liver_36988,Enhancers_Liver_36989,Enhancers_Liver_37004
ENSFDAG00000003904	Stk10	Enhancers_Liver_12258,Enhancers_Liver_12264,Enhancers_Liver_12271,Enhancers_Liver_12274
ENSFDAG00000011716	Fbxw11	Enhancers_Liver_12258,Enhancers_Liver_12264,Enhancers_Liver_12271,Enhancers_Liver_12274
ENSFDAG00000006717	Kcnmb1	Enhancers_Liver_12299
ENSFDAG00000001486	Lcp2	Enhancers_Liver_12299
ENSFDAG00000013935	Slit3	Enhancers_Liver_12365
ENSFDAG00000017945	Pank3	Enhancers_Liver_12365
ENSFDAG00000008884	Nfatc3	Enhancers_Liver_82512,Enhancers_Liver_82513
ENSFDAG00000007744	Bcas1	Enhancers_Liver_52800,Enhancers_Liver_52801
ENSFDAG00000014787	Tshz2	Enhancers_Liver_52800,Enhancers_Liver_52801
ENSFDAG00000015148	Adam33	Enhancers_Liver_50859
ENSFDAG00000012395	Atrn	Enhancers_Liver_50859
ENSFDAG00000012399	Mgst2	Enhancers_Liver_54130,Enhancers_Liver_54134,Enhancers_Liver_54154,Enhancers_Liver_54181
ENSFDAG00000017858	Maml3	Enhancers_Liver_54130,Enhancers_Liver_54134,Enhancers_Liver_54154,Enhancers_Liver_54181
ENSFDAG00000009301	Arpp21	Enhancers_Liver_90538
ENSFDAG00000009109	Stac	Enhancers_Liver_90538
ENSFDAG00000009769	Armc1	Enhancers_Liver_53409,Enhancers_Liver_53411
ENSFDAG00000006999	Mtfr1	Enhancers_Liver_53409,Enhancers_Liver_53411
ENSFDAG00000013540	Col23a1	Enhancers_Liver_12690
ENSFDAG00000017882	Clk4	Enhancers_Liver_12690
ENSFDAG00000016490	Hnrnpab	Enhancers_Liver_12696
ENSFDAG00000007877	Phykpl	Enhancers_Liver_12696
ENSFDAG00000020017	Jade2	Enhancers_Liver_12722
ENSFDAG00000005969	Cdkn2aipnl	Enhancers_Liver_12722
ENSFDAG00000011396	Cdkl3	Enhancers_Liver_12730
ENSFDAG00000005951	Ppp2ca	Enhancers_Liver_12730
ENSFDAG00000004181	Irf1	Enhancers_Liver_12798
ENSFDAG00000002311	N.A	Enhancers_Liver_12798
ENSFDAG00000011579	Rapgef6	Enhancers_Liver_12842
ENSFDAG00000014736	Cdc42se2	Enhancers_Liver_12842
ENSFDAG00000019981	Gm2a	Enhancers_Liver_12873
ENSFDAG00000015455	Shmt1	Enhancers_Liver_15662,Enhancers_Liver_15663
ENSFDAG00000013791	Chd6	Enhancers_Liver_52210,Enhancers_Liver_52216,Enhancers_Liver_52222
ENSFDAG00000014171	Shisa6	Enhancers_Liver_13324
ENSFDAG00000019303	N.A	Enhancers_Liver_13324
ENSFDAG00000002662	Alox8	Enhancers_Liver_13468
ENSFDAG00000014137	Gucy2e	Enhancers_Liver_13468
ENSFDAG00000007904	Atp1b2	Enhancers_Liver_13483
ENSFDAG00000006679	Trp53	Enhancers_Liver_13483
ENSFDAG00000004742	Clec10a	Enhancers_Liver_13526
ENSFDAG00000020820	Asgr2	Enhancers_Liver_13526
ENSFDAG00000021273	Eif1	Enhancers_Liver_13687
ENSFDAG00000020214	Zzef1	Enhancers_Liver_13687
ENSFDAG00000021398	Atp2a3	Enhancers_Liver_13708
ENSFDAG00000011544	P2rx1	Enhancers_Liver_13708,Enhancers_Liver_13715
ENSFDAG00000007868	Camkk1	Enhancers_Liver_13715,Enhancers_Liver_13718
ENSFDAG00000004835	Olfr403	Enhancers_Liver_13747
ENSFDAG00000010405	Rap1gap2	Enhancers_Liver_13747
ENSFDAG00000000769	Srr	Enhancers_Liver_13781
ENSFDAG00000015106	Smg6	Enhancers_Liver_13781,Enhancers_Liver_13797
ENSFDAG00000021489	Hic1	Enhancers_Liver_13797
ENSFDAG00000015187	Rtn4rl1	Enhancers_Liver_13839
ENSFDAG00000007720	Rpa1	Enhancers_Liver_13839
ENSFDAG00000004711	Prpf8	Enhancers_Liver_13863
ENSFDAG00000000635	N.A	Enhancers_Liver_13863
ENSFDAG00000020931	Scarf1	Enhancers_Liver_13866
ENSFDAG00000021429	Slc43a2	Enhancers_Liver_13866,Enhancers_Liver_13873
ENSFDAG00000016069	Pitpna	Enhancers_Liver_13873
ENSFDAG00000013295	Rph3al	Enhancers_Liver_13921
ENSFDAG00000010953	1700016K19Rik	Enhancers_Liver_13921
ENSFDAG00000002701	Rflnb	Enhancers_Liver_13926
ENSFDAG00000014166	Vps53	Enhancers_Liver_13926
ENSFDAG00000014016	N.A	Enhancers_Liver_13941,Enhancers_Liver_13942,Enhancers_Liver_13943
ENSFDAG00000008512	Timm22	Enhancers_Liver_13941,Enhancers_Liver_13942,Enhancers_Liver_13943
ENSFDAG00000008698	Abr	Enhancers_Liver_13967
ENSFDAG00000018016	Bhlha9	Enhancers_Liver_13967
ENSFDAG00000011385	Tmigd1	Enhancers_Liver_13999,Enhancers_Liver_14000
ENSFDAG00000019592	Blmh	Enhancers_Liver_13999,Enhancers_Liver_14000,Enhancers_Liver_14003,Enhancers_Liver_14007
ENSFDAG00000018277	Slc6a4	Enhancers_Liver_14003,Enhancers_Liver_14007
ENSFDAG00000012148	Ssh2	Enhancers_Liver_14024
ENSFDAG00000013688	Coro6	Enhancers_Liver_14024
ENSFDAG00000010640	Nufip2	Enhancers_Liver_14077
ENSFDAG00000014546	Myo18a	Enhancers_Liver_14077,Enhancers_Liver_14093
ENSFDAG00000005579	Pipox	Enhancers_Liver_14093
ENSFDAG00000000141	Slc46a1	Enhancers_Liver_14153
ENSFDAG00000014910	Sarm1	Enhancers_Liver_14153
ENSFDAG00000012920	Poldip2	Enhancers_Liver_14156
ENSFDAG00000018379	Tnfaip1	Enhancers_Liver_14156
ENSFDAG00000010847	Tmem97	Enhancers_Liver_14174
ENSFDAG00000019208	Nlk	Enhancers_Liver_14174,Enhancers_Liver_14189
ENSFDAG00000009465	Lyrm9	Enhancers_Liver_14189
ENSFDAG00000013460	N.A	Enhancers_Liver_14303
ENSFDAG00000015924	Rhot1	Enhancers_Liver_14303
ENSFDAG00000014235	Asic2	Enhancers_Liver_14355
ENSFDAG00000011118	N.A	Enhancers_Liver_14364,Enhancers_Liver_14365
ENSFDAG00000008877	Dusp14	Enhancers_Liver_14471,Enhancers_Liver_14472,Enhancers_Liver_14473
ENSFDAG00000012908	Tada2a	Enhancers_Liver_14471,Enhancers_Liver_14472,Enhancers_Liver_14473,Enhancers_Liver_14474
ENSFDAG00000021505	Acaca	Enhancers_Liver_14474,Enhancers_Liver_14497
ENSFDAG00000012724	Aatf	Enhancers_Liver_14497
ENSFDAG00000012211	Lhx1	Enhancers_Liver_14507
ENSFDAG00000018545	Mrm1	Enhancers_Liver_14507
ENSFDAG00000011144	Ggnbp2	Enhancers_Liver_14519
ENSFDAG00000011939	Pigw	Enhancers_Liver_14519
ENSFDAG00000013200	Tbx2	Enhancers_Liver_14561,Enhancers_Liver_14586
ENSFDAG00000018036	Bcas3	Enhancers_Liver_14561,Enhancers_Liver_14586
ENSFDAG00000013495	Med13	Enhancers_Liver_14595,Enhancers_Liver_14604
ENSFDAG00000014605	Ints2	Enhancers_Liver_14595
ENSFDAG00000007152	Vmp1	Enhancers_Liver_14635,Enhancers_Liver_14636
ENSFDAG00000013600	Tubd1	Enhancers_Liver_14635,Enhancers_Liver_14636
ENSFDAG00000020946	Rnf43	Enhancers_Liver_14743
ENSFDAG00000016718	Supt4a	Enhancers_Liver_14743
ENSFDAG00000017786	Mpo	Enhancers_Liver_14752,Enhancers_Liver_14756
ENSFDAG00000018275	Lpo	Enhancers_Liver_14756
ENSFDAG00000010646	Srsf1	Enhancers_Liver_14766
ENSFDAG00000010026	Vezf1	Enhancers_Liver_14766,Enhancers_Liver_14784
ENSFDAG00000008632	Cuedc1	Enhancers_Liver_14784,Enhancers_Liver_14789,Enhancers_Liver_14792
ENSFDAG00000007153	Mrps23	Enhancers_Liver_14789,Enhancers_Liver_14792,Enhancers_Liver_14803
ENSFDAG00000016118	Msi2	Enhancers_Liver_14803
ENSFDAG00000011224	Ankfn1	Enhancers_Liver_14879
ENSFDAG00000007360	Gm525	Enhancers_Liver_14879
ENSFDAG00000007408	Car10	Enhancers_Liver_14951,Enhancers_Liver_14952
ENSFDAG00000009656	Utp18	Enhancers_Liver_14951,Enhancers_Liver_14952
ENSFDAG00000018786	Wfikkn2	Enhancers_Liver_14988,Enhancers_Liver_14991
ENSFDAG00000006711	Spag9	Enhancers_Liver_14988,Enhancers_Liver_14991
ENSFDAG00000007121	Abcc3	Enhancers_Liver_15041
ENSFDAG00000008271	Ankrd40	Enhancers_Liver_15041
ENSFDAG00000013775	Spata20	Enhancers_Liver_15057
ENSFDAG00000000183	Eme1	Enhancers_Liver_15075
ENSFDAG00000012005	Lrrc59	Enhancers_Liver_15075
ENSFDAG00000003057	Xylt2	Enhancers_Liver_15090
ENSFDAG00000015307	Lrrc39	Enhancers_Liver_15089
ENSFDAG00000013235	Dbt	Enhancers_Liver_15089
ENSFDAG00000004129	Col1a1	Enhancers_Liver_15090
ENSFDAG00000018797	Slc35b1	Enhancers_Liver_15132,Enhancers_Liver_15143
ENSFDAG00000007364	Spop	Enhancers_Liver_15143,Enhancers_Liver_15156
ENSFDAG00000009268	Nxph3	Enhancers_Liver_15156
ENSFDAG00000002523	Hoxb1	Enhancers_Liver_15210
ENSFDAG00000019925	Skap1	Enhancers_Liver_15227
ENSFDAG00000007321	Snx11	Enhancers_Liver_15227
ENSFDAG00000017513	Arhgap23	Enhancers_Liver_15302
ENSFDAG00000018166	Srcin1	Enhancers_Liver_15302
ENSFDAG00000018885	Ikzf3	Enhancers_Liver_15350
ENSFDAG00000017111	Grb7	Enhancers_Liver_15350
ENSFDAG00000016378	Msl1	Enhancers_Liver_15377
ENSFDAG00000001310	Igfbp4	Enhancers_Liver_15404,Enhancers_Liver_15410
ENSFDAG00000005866	Tns4	Enhancers_Liver_15404,Enhancers_Liver_15410
ENSFDAG00000017113	Meox2	Enhancers_Liver_17947
ENSFDAG00000017841	Gosr2	Enhancers_Liver_15662,Enhancers_Liver_15663,Enhancers_Liver_15672
ENSFDAG00000015784	Wnt9b	Enhancers_Liver_15672
ENSFDAG00000004238	Itgb3	Enhancers_Liver_15729,Enhancers_Liver_15730
ENSFDAG00000012740	N.A	Enhancers_Liver_15729,Enhancers_Liver_15730
ENSFDAG00000020516	Ddx42	Enhancers_Liver_15763
ENSFDAG00000010274	Ftsj3	Enhancers_Liver_15763
ENSFDAG00000013825	Ern1	Enhancers_Liver_15809
ENSFDAG00000016068	Tex2	Enhancers_Liver_15809
ENSFDAG00000016584	Pecam1	Enhancers_Liver_15841
ENSFDAG00000015094	Polg2	Enhancers_Liver_15841
ENSFDAG00000008065	Helz	Enhancers_Liver_15939
ENSFDAG00000007889	Cacng1	Enhancers_Liver_15939
ENSFDAG00000016279	Abca8a	Enhancers_Liver_16109
ENSFDAG00000007722	Abca9	Enhancers_Liver_16109
ENSFDAG00000016065	Map2k6	Enhancers_Liver_16181,Enhancers_Liver_16194
ENSFDAG00000010543	Kcnj16	Enhancers_Liver_16181,Enhancers_Liver_16194
ENSFDAG00000014018	Kcnj2	Enhancers_Liver_16203,Enhancers_Liver_16213,Enhancers_Liver_16215,Enhancers_Liver_16217,Enhancers_Liver_16221,Enhancers_Liver_16226,Enhancers_Liver_16227,Enhancers_Liver_16228,Enhancers_Liver_16229,Enhancers_Liver_16234
ENSFDAG00000012886	Sox9	Enhancers_Liver_16226,Enhancers_Liver_16227,Enhancers_Liver_16228,Enhancers_Liver_16229,Enhancers_Liver_16234,Enhancers_Liver_16262,Enhancers_Liver_16282,Enhancers_Liver_16283
ENSFDAG00000006801	Sstr2	Enhancers_Liver_16262,Enhancers_Liver_16282,Enhancers_Liver_16283
ENSFDAG00000008580	Slc39a11	Enhancers_Liver_16292
ENSFDAG00000015565	Tmem94	Enhancers_Liver_16409,Enhancers_Liver_16411,Enhancers_Liver_16412
ENSFDAG00000009977	Caskin2	Enhancers_Liver_16409,Enhancers_Liver_16411,Enhancers_Liver_16412
ENSFDAG00000014485	Llgl2	Enhancers_Liver_16427
ENSFDAG00000015409	Trim47	Enhancers_Liver_16453
ENSFDAG00000021310	Trim65	Enhancers_Liver_16453
ENSFDAG00000009306	N.A	Enhancers_Liver_16465
ENSFDAG00000009877	Evpl	Enhancers_Liver_16465
ENSFDAG00000004027	Aanat	Enhancers_Liver_16500
ENSFDAG00000018909	Rhbdf2	Enhancers_Liver_16500
ENSFDAG00000012675	Prcd	Enhancers_Liver_16511
ENSFDAG00000010108	St6galnac2	Enhancers_Liver_16511
ENSFDAG00000002464	St6galnac1	Enhancers_Liver_16524
ENSFDAG00000016293	Jmjd6	Enhancers_Liver_16524
ENSFDAG00000013659	Sec14l1	Enhancers_Liver_16556
ENSFDAG00000012964	Septin9	Enhancers_Liver_16556,Enhancers_Liver_16592
ENSFDAG00000010368	Tnrc6c	Enhancers_Liver_16592
ENSFDAG00000013717	Pgs1	Enhancers_Liver_16635
ENSFDAG00000017856	Dnah17	Enhancers_Liver_16635
ENSFDAG00000012307	Cyth1	Enhancers_Liver_16659
ENSFDAG00000008795	Usp36	Enhancers_Liver_16659,Enhancers_Liver_16680
ENSFDAG00000015759	Timp2	Enhancers_Liver_16680,Enhancers_Liver_16686,Enhancers_Liver_16689
ENSFDAG00000007359	Lgals3bp	Enhancers_Liver_16686,Enhancers_Liver_16689
ENSFDAG00000018139	Cbx8	Enhancers_Liver_16720
ENSFDAG00000005238	Cbx4	Enhancers_Liver_16720
ENSFDAG00000009436	Slc16a3	Enhancers_Liver_16892,Enhancers_Liver_16893
ENSFDAG00000012352	Csnk1d	Enhancers_Liver_16892,Enhancers_Liver_16893
ENSFDAG00000017260	Dnmt3a	Enhancers_Liver_16983,Enhancers_Liver_16985
ENSFDAG00000001221	Efr3b	Enhancers_Liver_16983,Enhancers_Liver_16985
ENSFDAG00000016727	Trib2	Enhancers_Liver_17249,Enhancers_Liver_17301
ENSFDAG00000012547	Lpin1	Enhancers_Liver_17301
ENSFDAG00000012130	E2f6	Enhancers_Liver_17328
ENSFDAG00000018891	Rock2	Enhancers_Liver_17328
ENSFDAG00000009238	Asap2	Enhancers_Liver_17399,Enhancers_Liver_17408
ENSFDAG00000006317	Cpsf3	Enhancers_Liver_17399,Enhancers_Liver_17408
ENSFDAG00000013193	Adam17	Enhancers_Liver_17418
ENSFDAG00000006021	Iah1	Enhancers_Liver_17418
ENSFDAG00000017707	Prkar2b	Enhancers_Liver_17666,Enhancers_Liver_17667
ENSFDAG00000017872	Pik3cg	Enhancers_Liver_17666,Enhancers_Liver_17667,Enhancers_Liver_17684,Enhancers_Liver_17685,Enhancers_Liver_17688,Enhancers_Liver_17700,Enhancers_Liver_17701,Enhancers_Liver_17704,Enhancers_Liver_17710
ENSFDAG00000006943	Nampt	Enhancers_Liver_17684,Enhancers_Liver_17685,Enhancers_Liver_17688,Enhancers_Liver_17700,Enhancers_Liver_17701,Enhancers_Liver_17704,Enhancers_Liver_17710,Enhancers_Liver_17723
ENSFDAG00000011850	Sypl	Enhancers_Liver_17723,Enhancers_Liver_17741,Enhancers_Liver_17742,Enhancers_Liver_17743
ENSFDAG00000003188	Cdhr3	Enhancers_Liver_17741,Enhancers_Liver_17742,Enhancers_Liver_17743
ENSFDAG00000014555	N.A	Enhancers_Liver_17758,Enhancers_Liver_17759,Enhancers_Liver_17762,Enhancers_Liver_17766,Enhancers_Liver_17769,Enhancers_Liver_17782
ENSFDAG00000001127	Atxn7l1	Enhancers_Liver_17758,Enhancers_Liver_17759,Enhancers_Liver_17762,Enhancers_Liver_17766,Enhancers_Liver_17769,Enhancers_Liver_17782
ENSFDAG00000020997	Hdac9	Enhancers_Liver_17788
ENSFDAG00000010313	Snx13	Enhancers_Liver_17788,Enhancers_Liver_17835
ENSFDAG00000005741	Ahr	Enhancers_Liver_17835
ENSFDAG00000012273	Crppa	Enhancers_Liver_17947
ENSFDAG00000019172	Etv1	Enhancers_Liver_17989
ENSFDAG00000019045	Arl4a	Enhancers_Liver_17989
ENSFDAG00000021044	Lsmem1	Enhancers_Liver_18012
ENSFDAG00000017090	Ifrd1	Enhancers_Liver_18012
ENSFDAG00000016964	Immp2l	Enhancers_Liver_18084
ENSFDAG00000009265	Lrrn3	Enhancers_Liver_18084
ENSFDAG00000014655	Nrcam	Enhancers_Liver_18124,Enhancers_Liver_18126
ENSFDAG00000008544	Pnpla8	Enhancers_Liver_18124,Enhancers_Liver_18126
ENSFDAG00000021296	Stxbp6	Enhancers_Liver_18152
ENSFDAG00000020982	Egln3	Enhancers_Liver_18255
ENSFDAG00000021208	Eapp	Enhancers_Liver_18255
ENSFDAG00000008920	Clec14a	Enhancers_Liver_18385,Enhancers_Liver_18386
ENSFDAG00000001794	Sec23a	Enhancers_Liver_18385,Enhancers_Liver_18386
ENSFDAG00000009646	Galnt1	Enhancers_Liver_18436
ENSFDAG00000009943	Klhdc2	Enhancers_Liver_18451
ENSFDAG00000014317	Klhdc1	Enhancers_Liver_18451
ENSFDAG00000020010	Arf6	Enhancers_Liver_18463
ENSFDAG00000011541	Vcpkmt	Enhancers_Liver_18463
ENSFDAG00000019344	L2hgdh	Enhancers_Liver_18495
ENSFDAG00000016816	Sos2	Enhancers_Liver_18495
ENSFDAG00000011478	Abhd12b	Enhancers_Liver_18545,Enhancers_Liver_18546,Enhancers_Liver_18547,Enhancers_Liver_18550,Enhancers_Liver_18551,Enhancers_Liver_18554
ENSFDAG00000004825	Pygl	Enhancers_Liver_18545,Enhancers_Liver_18546,Enhancers_Liver_18547,Enhancers_Liver_18550,Enhancers_Liver_18551,Enhancers_Liver_18554
ENSFDAG00000008684	Tmx1	Enhancers_Liver_18587
ENSFDAG00000014158	Frmd6	Enhancers_Liver_18587
ENSFDAG00000020917	Psma3	Enhancers_Liver_18615
ENSFDAG00000005958	Arid4a	Enhancers_Liver_18615
ENSFDAG00000006183	Dact1	Enhancers_Liver_18659
ENSFDAG00000007851	Daam1	Enhancers_Liver_18659
ENSFDAG00000005005	Six1	Enhancers_Liver_18755
ENSFDAG00000013603	Six6	Enhancers_Liver_18755
ENSFDAG00000007236	Prkch	Enhancers_Liver_18819,Enhancers_Liver_18820
ENSFDAG00000007186	Hif1a	Enhancers_Liver_18819,Enhancers_Liver_18820
ENSFDAG00000020904	Ppp1r36	Enhancers_Liver_18964
ENSFDAG00000012625	Plekhg3	Enhancers_Liver_18964,Enhancers_Liver_18983,Enhancers_Liver_18985
ENSFDAG00000009994	Sptb	Enhancers_Liver_18983,Enhancers_Liver_18985
ENSFDAG00000001557	Fam98a	Enhancers_Liver_38841
ENSFDAG00000000548	Rad51b	Enhancers_Liver_19155,Enhancers_Liver_19156,Enhancers_Liver_19157,Enhancers_Liver_19217,Enhancers_Liver_19241
ENSFDAG00000014938	Zfp36l1	Enhancers_Liver_19155,Enhancers_Liver_19156,Enhancers_Liver_19157,Enhancers_Liver_19217,Enhancers_Liver_19241
ENSFDAG00000007286	Plekhd1	Enhancers_Liver_19295
ENSFDAG00000019183	Susd6	Enhancers_Liver_19295,Enhancers_Liver_19326,Enhancers_Liver_19327
ENSFDAG00000011562	Srsf5	Enhancers_Liver_19326,Enhancers_Liver_19327
ENSFDAG00000016296	Smoc1	Enhancers_Liver_19369,Enhancers_Liver_19371,Enhancers_Liver_19372,Enhancers_Liver_19378
ENSFDAG00000020001	Slc8a3	Enhancers_Liver_19369,Enhancers_Liver_19371,Enhancers_Liver_19372,Enhancers_Liver_19378
ENSFDAG00000008077	Pcnx	Enhancers_Liver_19422
ENSFDAG00000009219	Sipa1l1	Enhancers_Liver_19422,Enhancers_Liver_19432,Enhancers_Liver_19446,Enhancers_Liver_19449,Enhancers_Liver_19450,Enhancers_Liver_19452
ENSFDAG00000017037	Rgs6	Enhancers_Liver_19432,Enhancers_Liver_19446,Enhancers_Liver_19449,Enhancers_Liver_19450,Enhancers_Liver_19452,Enhancers_Liver_19479,Enhancers_Liver_19480
ENSFDAG00000003311	Gtf2a1	Enhancers_Liver_19867
ENSFDAG00000007850	Dpf3	Enhancers_Liver_19479,Enhancers_Liver_19480,Enhancers_Liver_19507
ENSFDAG00000018924	Dcaf4	Enhancers_Liver_19507
ENSFDAG00000005217	Psen1	Enhancers_Liver_19520,Enhancers_Liver_19521
ENSFDAG00000009295	Papln	Enhancers_Liver_19520,Enhancers_Liver_19521
ENSFDAG00000008081	Numb	Enhancers_Liver_19532
ENSFDAG00000008317	Dnal1	Enhancers_Liver_19557
ENSFDAG00000005478	Mideas	Enhancers_Liver_19557
ENSFDAG00000013852	Coq6	Enhancers_Liver_19587
ENSFDAG00000008828	Entpd5	Enhancers_Liver_19587
ENSFDAG00000006949	Ltbp2	Enhancers_Liver_19611
ENSFDAG00000016567	Arel1	Enhancers_Liver_19611
ENSFDAG00000013712	Pgf	Enhancers_Liver_19634
ENSFDAG00000007970	Eif2b2	Enhancers_Liver_19634
ENSFDAG00000014058	Cipc	Enhancers_Liver_19799
ENSFDAG00000019315	Zdhhc22	Enhancers_Liver_19799
ENSFDAG00000008388	Ahsa1	Enhancers_Liver_19815
ENSFDAG00000000882	Sptlc2	Enhancers_Liver_19815
ENSFDAG00000004302	Usp1	Enhancers_Liver_60421
ENSFDAG00000018692	Angptl3	Enhancers_Liver_60421,Enhancers_Liver_60427
ENSFDAG00000001444	Dio2	Enhancers_Liver_19854
ENSFDAG00000007843	Ston2	Enhancers_Liver_19867
ENSFDAG00000015851	Nelfcd	Enhancers_Liver_19908,Enhancers_Liver_19919
ENSFDAG00000001530	Flrt2	Enhancers_Liver_19921,Enhancers_Liver_19922
ENSFDAG00000003097	Gpr65	Enhancers_Liver_19957,Enhancers_Liver_19958,Enhancers_Liver_19959
ENSFDAG00000020307	Kcnk10	Enhancers_Liver_19957,Enhancers_Liver_19958,Enhancers_Liver_19959
ENSFDAG00000009953	Zc3h14	Enhancers_Liver_19978
ENSFDAG00000009121	Gabpb2	Enhancers_Liver_19978
ENSFDAG00000019081	Foxn3	Enhancers_Liver_20065,Enhancers_Liver_20082
ENSFDAG00000010245	Efcab11	Enhancers_Liver_20065,Enhancers_Liver_20082
ENSFDAG00000014367	Calm1	Enhancers_Liver_20107,Enhancers_Liver_20127
ENSFDAG00000020386	Ttc7b	Enhancers_Liver_20107,Enhancers_Liver_20127
ENSFDAG00000010033	Tc2n	Enhancers_Liver_20169,Enhancers_Liver_20176
ENSFDAG00000015791	Fbln5	Enhancers_Liver_20176
ENSFDAG00000007293	Slc24a4	Enhancers_Liver_20199
ENSFDAG00000005808	Rin3	Enhancers_Liver_20199
ENSFDAG00000005666	Asb2	Enhancers_Liver_20285
ENSFDAG00000006504	Otub2	Enhancers_Liver_20285,Enhancers_Liver_20288
ENSFDAG00000014561	Ddx24	Enhancers_Liver_20288,Enhancers_Liver_20295
ENSFDAG00000011503	Ifi27	Enhancers_Liver_20295
ENSFDAG00000015758	Ppp4r4	Enhancers_Liver_20303
ENSFDAG00000008977	Serpina10	Enhancers_Liver_20303
ENSFDAG00000021287	Dicer1	Enhancers_Liver_20400
ENSFDAG00000017101	Clmn	Enhancers_Liver_20400,Enhancers_Liver_20423
ENSFDAG00000021460	Syne3	Enhancers_Liver_20423
ENSFDAG00000010370	Papola	Enhancers_Liver_20465
ENSFDAG00000021286	Vrk1	Enhancers_Liver_20465,Enhancers_Liver_20469,Enhancers_Liver_20471
ENSFDAG00000017903	Eml1	Enhancers_Liver_20514
ENSFDAG00000017144	Slc25a47	Enhancers_Liver_20550
ENSFDAG00000009856	Wars	Enhancers_Liver_20550
ENSFDAG00000010071	Ppp2r5c	Enhancers_Liver_20577,Enhancers_Liver_20583
ENSFDAG00000009932	Dync1h1	Enhancers_Liver_20577,Enhancers_Liver_20583
ENSFDAG00000006540	Wdr20rt	Enhancers_Liver_20612
ENSFDAG00000016134	Mok	Enhancers_Liver_20612
ENSFDAG00000011737	Traf3	Enhancers_Liver_20639
ENSFDAG00000010475	Cdc42bpb	Enhancers_Liver_20639
ENSFDAG00000003407	Mark3	Enhancers_Liver_20660
ENSFDAG00000009079	Ckb	Enhancers_Liver_20660
ENSFDAG00000009869	Ppp1r13b	Enhancers_Liver_20685
ENSFDAG00000019471	Atp5mpl	Enhancers_Liver_20685
ENSFDAG00000009611	Pld4	Enhancers_Liver_20747
ENSFDAG00000003762	Jag2	Enhancers_Liver_20763
ENSFDAG00000014503	Nudt14	Enhancers_Liver_20763
ENSFDAG00000016704	Ptprn2	Enhancers_Liver_64038
ENSFDAG00000013673	Dnajb6	Enhancers_Liver_64038
ENSFDAG00000003104	Itgb8	Enhancers_Liver_20851,Enhancers_Liver_20860,Enhancers_Liver_20866
ENSFDAG00000020695	Abcb5	Enhancers_Liver_20851
ENSFDAG00000007539	Macc1	Enhancers_Liver_20860,Enhancers_Liver_20866
ENSFDAG00000014658	Asb13	Enhancers_Liver_20893,Enhancers_Liver_20894
ENSFDAG00000017181	Net1	Enhancers_Liver_20893,Enhancers_Liver_20894
ENSFDAG00000015424	Akr1c20	Enhancers_Liver_20907,Enhancers_Liver_20928
ENSFDAG00000010583	Ucn3	Enhancers_Liver_20928
ENSFDAG00000009682	Akr1c14	Enhancers_Liver_20907
ENSFDAG00000008681	Akr1e1	Enhancers_Liver_20939,Enhancers_Liver_20986
ENSFDAG00000012934	Klf6	Enhancers_Liver_20939,Enhancers_Liver_20986,Enhancers_Liver_20991,Enhancers_Liver_20997,Enhancers_Liver_20998,Enhancers_Liver_20999,Enhancers_Liver_21004,Enhancers_Liver_21005
ENSFDAG00000000659	Yme1l1	Enhancers_Liver_20991,Enhancers_Liver_20997,Enhancers_Liver_20998,Enhancers_Liver_20999,Enhancers_Liver_21004,Enhancers_Liver_21005
ENSFDAG00000008677	Pfkp	Enhancers_Liver_21019
ENSFDAG00000006072	Pitrm1	Enhancers_Liver_21019
ENSFDAG00000018863	Gli3	Enhancers_Liver_21197
ENSFDAG00000021196	Inhba	Enhancers_Liver_21197,Enhancers_Liver_21238
ENSFDAG00000011467	Mep1b	Enhancers_Liver_40462,Enhancers_Liver_40463
ENSFDAG00000014071	N.A	Enhancers_Liver_21238,Enhancers_Liver_21239
ENSFDAG00000005731	Cdk13	Enhancers_Liver_21254
ENSFDAG00000021000	Rala	Enhancers_Liver_21254
ENSFDAG00000020437	Yae1d1	Enhancers_Liver_21266
ENSFDAG00000010983	Pou6f2	Enhancers_Liver_21266
ENSFDAG00000007294	Slc17a4	Enhancers_Liver_21363,Enhancers_Liver_21364
ENSFDAG00000013254	Slc17a3	Enhancers_Liver_21363,Enhancers_Liver_21364
ENSFDAG00000020594	Dcdc2a	Enhancers_Liver_21466,Enhancers_Liver_21473,Enhancers_Liver_21475
ENSFDAG00000000383	Nrsn1	Enhancers_Liver_21466,Enhancers_Liver_21473,Enhancers_Liver_21475
ENSFDAG00000017587	Agtr1b	Enhancers_Liver_87463
ENSFDAG00000021148	Cpb1	Enhancers_Liver_53453
ENSFDAG00000013560	Cpa3	Enhancers_Liver_53453
ENSFDAG00000001458	Exoc2	Enhancers_Liver_21610,Enhancers_Liver_21617
ENSFDAG00000013920	Gmds	Enhancers_Liver_21610,Enhancers_Liver_21617
ENSFDAG00000014306	C6	Enhancers_Liver_28987
ENSFDAG00000005660	Edn1	Enhancers_Liver_22151,Enhancers_Liver_22152,Enhancers_Liver_22155,Enhancers_Liver_22165
ENSFDAG00000017560	Phactr1	Enhancers_Liver_22151,Enhancers_Liver_22152,Enhancers_Liver_22155,Enhancers_Liver_22165
ENSFDAG00000000210	Btbd3	Enhancers_Liver_22299
ENSFDAG00000000295	Jarid2	Enhancers_Liver_22299,Enhancers_Liver_22341
ENSFDAG00000016277	Dtnbp1	Enhancers_Liver_22341
ENSFDAG00000021263	N.A	Enhancers_Liver_22622
ENSFDAG00000012432	Sema4d	Enhancers_Liver_22622,Enhancers_Liver_22631
ENSFDAG00000014067	N.A	Enhancers_Liver_22631
ENSFDAG00000019977	Syk	Enhancers_Liver_22708
ENSFDAG00000006707	Auh	Enhancers_Liver_22708
ENSFDAG00000013494	Ror2	Enhancers_Liver_22741
ENSFDAG00000009024	Sptlc1	Enhancers_Liver_22741
ENSFDAG00000009715	N.A	Enhancers_Liver_22773
ENSFDAG00000008962	Simc1	Enhancers_Liver_22773
ENSFDAG00000005985	Tmed9	Enhancers_Liver_22849
ENSFDAG00000015233	Fam193b	Enhancers_Liver_22849
ENSFDAG00000013557	Slc25a48	Enhancers_Liver_22884
ENSFDAG00000019467	Il9	Enhancers_Liver_22884
ENSFDAG00000016144	Fbxl21	Enhancers_Liver_22890
ENSFDAG00000011800	Lect2	Enhancers_Liver_22890
ENSFDAG00000009462	Aopep	Enhancers_Liver_23127,Enhancers_Liver_23153
ENSFDAG00000018149	Fancc	Enhancers_Liver_23127,Enhancers_Liver_23153
ENSFDAG00000013230	Ptch1	Enhancers_Liver_23190
ENSFDAG00000000805	Ercc6l2	Enhancers_Liver_23190
ENSFDAG00000017346	Zfp367	Enhancers_Liver_23223
ENSFDAG00000011255	Habp4	Enhancers_Liver_23223
ENSFDAG00000019333	Cdc14b	Enhancers_Liver_23231
ENSFDAG00000018974	Prxl2c	Enhancers_Liver_23231
ENSFDAG00000013330	Ptdss1	Enhancers_Liver_23259
ENSFDAG00000007257	Sdc2	Enhancers_Liver_23259,Enhancers_Liver_29750,Enhancers_Liver_29751,Enhancers_Liver_29757,Enhancers_Liver_29763
ENSFDAG00000002129	N.A	Enhancers_Liver_23287
ENSFDAG00000005946	Tent4a	Enhancers_Liver_23287
ENSFDAG00000018485	Zdhhc11	Enhancers_Liver_23357
ENSFDAG00000015939	Tppp	Enhancers_Liver_23357,Enhancers_Liver_23360,Enhancers_Liver_23361
ENSFDAG00000014664	Cep72	Enhancers_Liver_23360,Enhancers_Liver_23361
ENSFDAG00000020969	Mctp1	Enhancers_Liver_23446,Enhancers_Liver_23447
ENSFDAG00000004329	Slf1	Enhancers_Liver_23446,Enhancers_Liver_23447
ENSFDAG00000013922	Nr2f1	Enhancers_Liver_23467,Enhancers_Liver_23468,Enhancers_Liver_23472
ENSFDAG00000009114	N.A	Enhancers_Liver_23467,Enhancers_Liver_23468,Enhancers_Liver_23472,Enhancers_Liver_23481,Enhancers_Liver_23487,Enhancers_Liver_23489,Enhancers_Liver_23492
ENSFDAG00000009289	Atp6ap1l	Enhancers_Liver_23647
ENSFDAG00000008314	Rps23	Enhancers_Liver_23647
ENSFDAG00000008952	Ssbp2	Enhancers_Liver_23676
ENSFDAG00000000628	Acot12	Enhancers_Liver_23676
ENSFDAG00000010961	Ar	Enhancers_Liver_23747,Enhancers_Liver_90091,Enhancers_Liver_90097
ENSFDAG00000011859	Eda2r	Enhancers_Liver_23747
ENSFDAG00000015797	Bhmt	Enhancers_Liver_23756,Enhancers_Liver_23757
ENSFDAG00000008910	Bhmt2	Enhancers_Liver_23756,Enhancers_Liver_23757
ENSFDAG00000018125	Arsb	Enhancers_Liver_23825
ENSFDAG00000012313	Lhfpl2	Enhancers_Liver_23825
ENSFDAG00000018475	Wdr41	Enhancers_Liver_23842
ENSFDAG00000017704	Pde8b	Enhancers_Liver_23842
ENSFDAG00000021110	F2r	Enhancers_Liver_23911
ENSFDAG00000005533	Iqgap2	Enhancers_Liver_23911,Enhancers_Liver_23946,Enhancers_Liver_23967
ENSFDAG00000000843	N.A	Enhancers_Liver_89477
ENSFDAG00000012782	Sv2c	Enhancers_Liver_23946,Enhancers_Liver_23967
ENSFDAG00000003887	Cert1	Enhancers_Liver_23991
ENSFDAG00000011913	N.A	Enhancers_Liver_23991
ENSFDAG00000017887	Btf3	Enhancers_Liver_24082,Enhancers_Liver_24086,Enhancers_Liver_24088
ENSFDAG00000011624	Tmem174	Enhancers_Liver_24098
ENSFDAG00000013407	Cnn3	Enhancers_Liver_38948,Enhancers_Liver_38950,Enhancers_Liver_38952,Enhancers_Liver_38961
ENSFDAG00000012152	Fcho2	Enhancers_Liver_24117
ENSFDAG00000013345	Tnpo1	Enhancers_Liver_24117
ENSFDAG00000008515	Zfp366	Enhancers_Liver_24147
ENSFDAG00000009041	Ocln	Enhancers_Liver_24206,Enhancers_Liver_24209,Enhancers_Liver_24210
ENSFDAG00000017959	Marveld2	Enhancers_Liver_24209,Enhancers_Liver_24210
ENSFDAG00000007382	N.A	Enhancers_Liver_24357
ENSFDAG00000003064	Cd180	Enhancers_Liver_24357
ENSFDAG00000004130	Mast4	Enhancers_Liver_24422,Enhancers_Liver_24426
ENSFDAG00000017844	N.A	Enhancers_Liver_24422,Enhancers_Liver_24426
ENSFDAG00000012502	Erbin	Enhancers_Liver_24449
ENSFDAG00000009313	Nln	Enhancers_Liver_24449
ENSFDAG00000020845	Gpbp1	Enhancers_Liver_24619,Enhancers_Liver_24635
ENSFDAG00000015297	Plk2	Enhancers_Liver_24619
ENSFDAG00000018113	Map3k1	Enhancers_Liver_24662,Enhancers_Liver_24663,Enhancers_Liver_24664
ENSFDAG00000007532	Ankrd55	Enhancers_Liver_24662,Enhancers_Liver_24663,Enhancers_Liver_24664,Enhancers_Liver_24702
ENSFDAG00000004944	Il6st	Enhancers_Liver_24702
ENSFDAG00000018963	Plpp1	Enhancers_Liver_24774
ENSFDAG00000011199	Mtrex	Enhancers_Liver_24774
ENSFDAG00000017757	Ndufs4	Enhancers_Liver_24841
ENSFDAG00000014828	Fst	Enhancers_Liver_24841
ENSFDAG00000001729	Mocs2	Enhancers_Liver_24877,Enhancers_Liver_24880
ENSFDAG00000007035	Itga2	Enhancers_Liver_24877,Enhancers_Liver_24880
ENSFDAG00000010142	Flnb	Enhancers_Liver_24972,Enhancers_Liver_24988,Enhancers_Liver_25000
ENSFDAG00000019863	Dnase1l3	Enhancers_Liver_24972,Enhancers_Liver_24988,Enhancers_Liver_25000
ENSFDAG00000009470	Pxk	Enhancers_Liver_25043
ENSFDAG00000013803	Pdhb	Enhancers_Liver_25043
ENSFDAG00000006672	Fam3d	Enhancers_Liver_25077
ENSFDAG00000009626	Cfap20dc	Enhancers_Liver_25077
ENSFDAG00000014849	Naa50	Enhancers_Liver_25204
ENSFDAG00000011211	Synpr	Enhancers_Liver_25204
ENSFDAG00000012205	Atxn7	Enhancers_Liver_25241
ENSFDAG00000008999	Psmd6	Enhancers_Liver_25241,Enhancers_Liver_71648
ENSFDAG00000007406	N.A	Enhancers_Liver_25243
ENSFDAG00000015020	Eomes	Enhancers_Liver_25243
ENSFDAG00000015720	Top2b	Enhancers_Liver_25267,Enhancers_Liver_25279
ENSFDAG00000006096	Rarb	Enhancers_Liver_25267,Enhancers_Liver_25279,Enhancers_Liver_25287,Enhancers_Liver_25306,Enhancers_Liver_25310,Enhancers_Liver_25315
ENSFDAG00000014810	Thrb	Enhancers_Liver_25306,Enhancers_Liver_25310,Enhancers_Liver_25315,Enhancers_Liver_25403
ENSFDAG00000017064	Nr1d2	Enhancers_Liver_25403
ENSFDAG00000018407	Ptgdr	Enhancers_Liver_26607
ENSFDAG00000011780	Nid2	Enhancers_Liver_26607
ENSFDAG00000006993	Kcnk5	Enhancers_Liver_38042
ENSFDAG00000010965	Rpsa	Enhancers_Liver_38042
ENSFDAG00000004920	Msl3	Enhancers_Liver_90743
ENSFDAG00000008551	Lrmda	Enhancers_Liver_25733,Enhancers_Liver_25734
ENSFDAG00000008207	Kcnma1	Enhancers_Liver_25733,Enhancers_Liver_25734
ENSFDAG00000013783	N.A	Enhancers_Liver_25773,Enhancers_Liver_25774
ENSFDAG00000019362	Dlg5	Enhancers_Liver_25773,Enhancers_Liver_25774
ENSFDAG00000011718	Zmiz1	Enhancers_Liver_25815,Enhancers_Liver_25817,Enhancers_Liver_25829,Enhancers_Liver_25877
ENSFDAG00000014880	Ppif	Enhancers_Liver_25877,Enhancers_Liver_25891,Enhancers_Liver_25893,Enhancers_Liver_25906,Enhancers_Liver_25911
ENSFDAG00000007741	Zcchc24	Enhancers_Liver_25891,Enhancers_Liver_25893,Enhancers_Liver_25906,Enhancers_Liver_25911
ENSFDAG00000013251	Anxa11	Enhancers_Liver_25933
ENSFDAG00000013436	N.A	Enhancers_Liver_25933
ENSFDAG00000015634	Arhgef3	Enhancers_Liver_25967
ENSFDAG00000003424	Prkar2a	Enhancers_Liver_25967
ENSFDAG00000005890	Wnt5a	Enhancers_Liver_26035,Enhancers_Liver_26036,Enhancers_Liver_26040
ENSFDAG00000002978	N.A	Enhancers_Liver_26035,Enhancers_Liver_26036,Enhancers_Liver_26040
ENSFDAG00000018707	Lrtm1	Enhancers_Liver_26056,Enhancers_Liver_26059,Enhancers_Liver_26062,Enhancers_Liver_26064,Enhancers_Liver_26078
ENSFDAG00000002741	Cacna2d3	Enhancers_Liver_26056,Enhancers_Liver_26059,Enhancers_Liver_26062,Enhancers_Liver_26064,Enhancers_Liver_26078
ENSFDAG00000010041	Chdh	Enhancers_Liver_26096,Enhancers_Liver_26097,Enhancers_Liver_26105,Enhancers_Liver_26106,Enhancers_Liver_26109
ENSFDAG00000005588	Dcp1a	Enhancers_Liver_26096,Enhancers_Liver_26097,Enhancers_Liver_26105,Enhancers_Liver_26106,Enhancers_Liver_26109
ENSFDAG00000017474	Tkt	Enhancers_Liver_26125
ENSFDAG00000015556	Prkcd	Enhancers_Liver_26125
ENSFDAG00000021413	Stimate	Enhancers_Liver_26157
ENSFDAG00000012840	Mustn1	Enhancers_Liver_26157
ENSFDAG00000015835	Itih3	Enhancers_Liver_26192
ENSFDAG00000009825	Itih1	Enhancers_Liver_26192
ENSFDAG00000003319	Pbrm1	Enhancers_Liver_26212,Enhancers_Liver_26213
ENSFDAG00000015739	Smim4	Enhancers_Liver_26212,Enhancers_Liver_26213
ENSFDAG00000017504	Oxnad1	Enhancers_Liver_38051
ENSFDAG00000002171	Rftn1	Enhancers_Liver_38051
ENSFDAG00000018661	Parg	Enhancers_Liver_26328
ENSFDAG00000010184	Ogdhl	Enhancers_Liver_26328
ENSFDAG00000005173	Gdf10	Enhancers_Liver_26416
ENSFDAG00000018223	Ccser2	Enhancers_Liver_26504
ENSFDAG00000015140	Sh2d4b	Enhancers_Liver_26561,Enhancers_Liver_90536
ENSFDAG00000006530	Tspan14	Enhancers_Liver_26561,Enhancers_Liver_90536
ENSFDAG00000007738	Ddhd1	Enhancers_Liver_26673,Enhancers_Liver_26674
ENSFDAG00000009044	Bmp4	Enhancers_Liver_26673,Enhancers_Liver_26674,Enhancers_Liver_26709,Enhancers_Liver_26711,Enhancers_Liver_26714,Enhancers_Liver_26715,Enhancers_Liver_26716,Enhancers_Liver_26717,Enhancers_Liver_26725
ENSFDAG00000010113	Cdkn3	Enhancers_Liver_26709,Enhancers_Liver_26711,Enhancers_Liver_26714,Enhancers_Liver_26715,Enhancers_Liver_26716,Enhancers_Liver_26717,Enhancers_Liver_26725
ENSFDAG00000017942	Samd4	Enhancers_Liver_26753,Enhancers_Liver_26767,Enhancers_Liver_26771
ENSFDAG00000009760	Cgrrf1	Enhancers_Liver_26753
ENSFDAG00000015537	Gch1	Enhancers_Liver_26767,Enhancers_Liver_26771
ENSFDAG00000015575	G3bp2	Enhancers_Liver_26845
ENSFDAG00000019664	Tmem260	Enhancers_Liver_26845
ENSFDAG00000014945	Ap5m1	Enhancers_Liver_26868
ENSFDAG00000013964	Naa30	Enhancers_Liver_26868
ENSFDAG00000007407	Lrp10	Enhancers_Liver_26970
ENSFDAG00000019563	Mmp14	Enhancers_Liver_26970
ENSFDAG00000013256	Ajuba	Enhancers_Liver_26976
ENSFDAG00000005163	Haus4	Enhancers_Liver_26976
ENSFDAG00000020152	Cebpe	Enhancers_Liver_26985,Enhancers_Liver_26987,Enhancers_Liver_26991
ENSFDAG00000018651	1700123O20Rik	Enhancers_Liver_26985
ENSFDAG00000007896	Slc7a8	Enhancers_Liver_26991
ENSFDAG00000011105	N.A	Enhancers_Liver_27218,Enhancers_Liver_27219
ENSFDAG00000000380	Spata13	Enhancers_Liver_27218,Enhancers_Liver_27219
ENSFDAG00000012170	Spryd7	Enhancers_Liver_27279,Enhancers_Liver_27280
ENSFDAG00000021306	Gucy1b2	Enhancers_Liver_27303
ENSFDAG00000009920	Rnaseh2b	Enhancers_Liver_27303
ENSFDAG00000018324	Ints6	Enhancers_Liver_27327,Enhancers_Liver_27354
ENSFDAG00000011464	Wdfy2	Enhancers_Liver_27327,Enhancers_Liver_27354
ENSFDAG00000017538	Defb42	Enhancers_Liver_27367
ENSFDAG00000012218	Ctsb	Enhancers_Liver_27367
ENSFDAG00000005671	Gata4	Enhancers_Liver_27402
ENSFDAG00000019069	Blk	Enhancers_Liver_27402
ENSFDAG00000021014	Prss51	Enhancers_Liver_27450,Enhancers_Liver_27462
ENSFDAG00000013008	Msra	Enhancers_Liver_27450,Enhancers_Liver_27462
ENSFDAG00000007827	Kif13b	Enhancers_Liver_27495,Enhancers_Liver_27500
ENSFDAG00000015770	Hmbox1	Enhancers_Liver_27495,Enhancers_Liver_27500
ENSFDAG00000015092	Extl3	Enhancers_Liver_27526
ENSFDAG00000010161	Fzd3	Enhancers_Liver_27526
ENSFDAG00000010627	Pnoc	Enhancers_Liver_27553,Enhancers_Liver_27562,Enhancers_Liver_27569
ENSFDAG00000011000	Elp3	Enhancers_Liver_27553,Enhancers_Liver_27562,Enhancers_Liver_27569
ENSFDAG00000008809	Scara5	Enhancers_Liver_27582,Enhancers_Liver_27583
ENSFDAG00000017555	Pbk	Enhancers_Liver_27582,Enhancers_Liver_27583
ENSFDAG00000017756	Clu	Enhancers_Liver_27613
ENSFDAG00000017279	Gulo	Enhancers_Liver_27613,Enhancers_Liver_27618,Enhancers_Liver_27620
ENSFDAG00000011866	Ephx2	Enhancers_Liver_27618,Enhancers_Liver_27620
ENSFDAG00000005035	Trim35	Enhancers_Liver_27656
ENSFDAG00000021423	Stmn4	Enhancers_Liver_27656,Enhancers_Liver_27668
ENSFDAG00000011423	Adra1a	Enhancers_Liver_27668,Enhancers_Liver_27672,Enhancers_Liver_27681
ENSFDAG00000001091	Dpysl2	Enhancers_Liver_27672,Enhancers_Liver_27681
ENSFDAG00000014184	Pnma2	Enhancers_Liver_27691,Enhancers_Liver_27692
ENSFDAG00000003638	Bnip3l	Enhancers_Liver_27691,Enhancers_Liver_27692
ENSFDAG00000017536	Cdca2	Enhancers_Liver_27707
ENSFDAG00000009627	Kctd9	Enhancers_Liver_27707
ENSFDAG00000011985	Slc25a37	Enhancers_Liver_27757
ENSFDAG00000020057	Entpd4b	Enhancers_Liver_27757
ENSFDAG00000011046	Loxl2	Enhancers_Liver_27766
ENSFDAG00000001572	R3hcc1	Enhancers_Liver_27766
ENSFDAG00000009970	Pebp4	Enhancers_Liver_27772,Enhancers_Liver_27773
ENSFDAG00000011009	Egr3	Enhancers_Liver_27772,Enhancers_Liver_27773
ENSFDAG00000003694	Xpo7	Enhancers_Liver_27857
ENSFDAG00000008084	Dok2	Enhancers_Liver_27881
ENSFDAG00000018971	Gfra2	Enhancers_Liver_27881
ENSFDAG00000018312	Cog3	Enhancers_Liver_28097
ENSFDAG00000020920	Slc25a30	Enhancers_Liver_28097
ENSFDAG00000008673	Gpalpp1	Enhancers_Liver_28130
ENSFDAG00000008835	Tsc22d1	Enhancers_Liver_28130
ENSFDAG00000013099	N.A	Enhancers_Liver_28193
ENSFDAG00000010703	Lacc1	Enhancers_Liver_28193
ENSFDAG00000014122	Enox1	Enhancers_Liver_28200
ENSFDAG00000015900	Dnajc15	Enhancers_Liver_28200
ENSFDAG00000010109	Tnfsf11	Enhancers_Liver_28212,Enhancers_Liver_28214
ENSFDAG00000019008	Akap11	Enhancers_Liver_28212,Enhancers_Liver_28214
ENSFDAG00000018242	Diaph3	Enhancers_Liver_28330,Enhancers_Liver_28356
ENSFDAG00000016309	Klf5	Enhancers_Liver_28413,Enhancers_Liver_28420,Enhancers_Liver_28421,Enhancers_Liver_28427
ENSFDAG00000004922	Klf12	Enhancers_Liver_28413,Enhancers_Liver_28420,Enhancers_Liver_28421,Enhancers_Liver_28427,Enhancers_Liver_28442,Enhancers_Liver_28463,Enhancers_Liver_28479
ENSFDAG00000017968	Preb	Enhancers_Liver_64125,Enhancers_Liver_64126
ENSFDAG00000017731	Lmo7	Enhancers_Liver_28504
ENSFDAG00000008161	N.A	Enhancers_Liver_28504
ENSFDAG00000014032	Ednrb	Enhancers_Liver_28554
ENSFDAG00000010700	Pou4f1	Enhancers_Liver_28554
ENSFDAG00000004227	Ndfip2	Enhancers_Liver_28574
ENSFDAG00000021428	Glul	Enhancers_Liver_28574
ENSFDAG00000013774	Gpc5	Enhancers_Liver_28629,Enhancers_Liver_28630,Enhancers_Liver_28635,Enhancers_Liver_28638
ENSFDAG00000012714	Ipo5	Enhancers_Liver_28763
ENSFDAG00000006025	Farp1	Enhancers_Liver_28763
ENSFDAG00000011222	Plcxd3	Enhancers_Liver_28987
ENSFDAG00000010343	N.A	Enhancers_Liver_29041
ENSFDAG00000010372	Dab2	Enhancers_Liver_29041
ENSFDAG00000016962	Rictor	Enhancers_Liver_29081
ENSFDAG00000013319	Osmr	Enhancers_Liver_29081
ENSFDAG00000014081	Lifr	Enhancers_Liver_29155,Enhancers_Liver_29156
ENSFDAG00000010379	Egflam	Enhancers_Liver_29155,Enhancers_Liver_29156
ENSFDAG00000016486	Gdnf	Enhancers_Liver_29171
ENSFDAG00000021476	Wdr70	Enhancers_Liver_29171
ENSFDAG00000015306	Prlr	Enhancers_Liver_29255
ENSFDAG00000009878	Agxt2	Enhancers_Liver_29255
ENSFDAG00000008611	Rai14	Enhancers_Liver_29274,Enhancers_Liver_29275,Enhancers_Liver_29300,Enhancers_Liver_29308
ENSFDAG00000007198	N.A	Enhancers_Liver_29274,Enhancers_Liver_29275
ENSFDAG00000000130	C1qtnf3	Enhancers_Liver_29300,Enhancers_Liver_29308
ENSFDAG00000015069	Rbm39	Enhancers_Liver_29354
ENSFDAG00000005928	Tars	Enhancers_Liver_29354
ENSFDAG00000019066	Pdzd2	Enhancers_Liver_29414,Enhancers_Liver_29415,Enhancers_Liver_29416,Enhancers_Liver_29417,Enhancers_Liver_29419,Enhancers_Liver_29420,Enhancers_Liver_29432
ENSFDAG00000016738	N.A	Enhancers_Liver_29414,Enhancers_Liver_29415,Enhancers_Liver_29416,Enhancers_Liver_29417,Enhancers_Liver_29419,Enhancers_Liver_29420,Enhancers_Liver_29432
ENSFDAG00000018414	Drosha	Enhancers_Liver_29439
ENSFDAG00000007842	Cdh6	Enhancers_Liver_29439
ENSFDAG00000006503	Basp1	Enhancers_Liver_29494,Enhancers_Liver_29505
ENSFDAG00000014492	Myo10	Enhancers_Liver_29494,Enhancers_Liver_29505
ENSFDAG00000015951	Otulin	Enhancers_Liver_29588,Enhancers_Liver_29600,Enhancers_Liver_29601,Enhancers_Liver_29610
ENSFDAG00000013091	Otulinl	Enhancers_Liver_29625,Enhancers_Liver_29626
ENSFDAG00000008859	Trio	Enhancers_Liver_29625,Enhancers_Liver_29626,Enhancers_Liver_29672
ENSFDAG00000012600	Dnah5	Enhancers_Liver_29672
ENSFDAG00000005999	Ropn1l	Enhancers_Liver_29715
ENSFDAG00000010088	Marchf6	Enhancers_Liver_29715
ENSFDAG00000014841	Cpq	Enhancers_Liver_29750,Enhancers_Liver_29751,Enhancers_Liver_29757,Enhancers_Liver_29763,Enhancers_Liver_29793,Enhancers_Liver_29803
ENSFDAG00000020421	Tspyl5	Enhancers_Liver_29793,Enhancers_Liver_29803
ENSFDAG00000006667	Rnf19a	Enhancers_Liver_29879
ENSFDAG00000002234	Spag1	Enhancers_Liver_29879
ENSFDAG00000005583	N.A	Enhancers_Liver_29924
ENSFDAG00000016143	Snx31	Enhancers_Liver_29924
ENSFDAG00000018411	N.A	Enhancers_Liver_30138
ENSFDAG00000014817	Ncald	Enhancers_Liver_29965,Enhancers_Liver_29966
ENSFDAG00000009862	Grhl2	Enhancers_Liver_29965,Enhancers_Liver_29966,Enhancers_Liver_30438
ENSFDAG00000016821	Dcstamp	Enhancers_Liver_30023,Enhancers_Liver_30028
ENSFDAG00000015347	Dpys	Enhancers_Liver_30023,Enhancers_Liver_30028
ENSFDAG00000016316	Lrp12	Enhancers_Liver_30044
ENSFDAG00000005377	Zfpm2	Enhancers_Liver_30044
ENSFDAG00000013715	Oxr1	Enhancers_Liver_30084
ENSFDAG00000001218	Abra	Enhancers_Liver_30084,Enhancers_Liver_30095,Enhancers_Liver_30108
ENSFDAG00000006826	Angpt1	Enhancers_Liver_30095,Enhancers_Liver_30108,Enhancers_Liver_30115
ENSFDAG00000017927	Rspo2	Enhancers_Liver_30115
ENSFDAG00000010304	Trhr	Enhancers_Liver_30138
ENSFDAG00000016373	Ebag9	Enhancers_Liver_30162
ENSFDAG00000002233	Sybu	Enhancers_Liver_30162
ENSFDAG00000012104	Trps1	Enhancers_Liver_30186
ENSFDAG00000011110	N.A	Enhancers_Liver_30186,Enhancers_Liver_30192
ENSFDAG00000012650	Ext1	Enhancers_Liver_30292,Enhancers_Liver_30298,Enhancers_Liver_30299,Enhancers_Liver_30300,Enhancers_Liver_30304
ENSFDAG00000007441	Samd12	Enhancers_Liver_30292,Enhancers_Liver_30298,Enhancers_Liver_30299,Enhancers_Liver_30300,Enhancers_Liver_30304,Enhancers_Liver_30311
ENSFDAG00000020369	Tnfrsf11b	Enhancers_Liver_30311,Enhancers_Liver_30322
ENSFDAG00000012115	Colec10	Enhancers_Liver_30322,Enhancers_Liver_30328
ENSFDAG00000014750	Mal2	Enhancers_Liver_30328
ENSFDAG00000007034	Sntb1	Enhancers_Liver_30419,Enhancers_Liver_30438
ENSFDAG00000021233	N.A	Enhancers_Liver_30419
ENSFDAG00000016248	Has2	Enhancers_Liver_30476
ENSFDAG00000016222	Lcor	Enhancers_Liver_30467
ENSFDAG00000016308	Pik3ap1	Enhancers_Liver_30467
ENSFDAG00000000438	N.A	Enhancers_Liver_30476
ENSFDAG00000019003	Zhx2	Enhancers_Liver_30519
ENSFDAG00000015207	Derl1	Enhancers_Liver_30519
ENSFDAG00000010355	Fbxo32	Enhancers_Liver_30542
ENSFDAG00000017120	Wdyhv1	Enhancers_Liver_30542
ENSFDAG00000017060	Fer1l6	Enhancers_Liver_30561,Enhancers_Liver_30562,Enhancers_Liver_30565
ENSFDAG00000003049	Tmem65	Enhancers_Liver_30561,Enhancers_Liver_30562,Enhancers_Liver_30565
ENSFDAG00000020325	Rnf139	Enhancers_Liver_30593
ENSFDAG00000008623	Ndufb9	Enhancers_Liver_30593
ENSFDAG00000010897	Mtss1	Enhancers_Liver_30599
ENSFDAG00000007665	Tatdn1	Enhancers_Liver_30599
ENSFDAG00000006848	Trib1	Enhancers_Liver_30714,Enhancers_Liver_30747,Enhancers_Liver_30765
ENSFDAG00000017112	Lratd2	Enhancers_Liver_30714,Enhancers_Liver_30747,Enhancers_Liver_30765
ENSFDAG00000015327	N.A	Enhancers_Liver_30865,Enhancers_Liver_30866,Enhancers_Liver_30881,Enhancers_Liver_30882,Enhancers_Liver_30888,Enhancers_Liver_30891,Enhancers_Liver_30896,Enhancers_Liver_30897,Enhancers_Liver_30903,Enhancers_Liver_30911
ENSFDAG00000010798	Cyrib	Enhancers_Liver_30938
ENSFDAG00000011773	Asap1	Enhancers_Liver_30938,Enhancers_Liver_30982,Enhancers_Liver_30984,Enhancers_Liver_30985
ENSFDAG00000012391	Adcy8	Enhancers_Liver_30982,Enhancers_Liver_30984,Enhancers_Liver_30985
ENSFDAG00000014262	Trappc9	Enhancers_Liver_31191
ENSFDAG00000016817	Chrac1	Enhancers_Liver_31191
ENSFDAG00000010941	Sidt2	Enhancers_Liver_31233
ENSFDAG00000020995	Slc45a4	Enhancers_Liver_31233,Enhancers_Liver_31243
ENSFDAG00000014309	Ptp4a3	Enhancers_Liver_31243
ENSFDAG00000011112	Gm6569	Enhancers_Liver_31257,Enhancers_Liver_31262,Enhancers_Liver_31267
ENSFDAG00000021090	Adgrb1	Enhancers_Liver_31257,Enhancers_Liver_31262,Enhancers_Liver_31267,Enhancers_Liver_31272,Enhancers_Liver_31273
ENSFDAG00000006647	Mroh4	Enhancers_Liver_31272,Enhancers_Liver_31273
ENSFDAG00000020044	Psca	Enhancers_Liver_31284
ENSFDAG00000016929	Myh9	Enhancers_Liver_31495,Enhancers_Liver_31522
ENSFDAG00000012971	Txn2	Enhancers_Liver_31522
ENSFDAG00000015169	Ncf4	Enhancers_Liver_31545
ENSFDAG00000008334	Sun2	Enhancers_Liver_31686
ENSFDAG00000009765	Timm13	Enhancers_Liver_31686
ENSFDAG00000017953	Enthd1	Enhancers_Liver_31726
ENSFDAG00000016878	Cacna1i	Enhancers_Liver_31726
ENSFDAG00000006165	Fam83f	Enhancers_Liver_31729,Enhancers_Liver_31745
ENSFDAG00000002610	Grap2	Enhancers_Liver_31729
ENSFDAG00000021368	Tnrc6b	Enhancers_Liver_31745
ENSFDAG00000006435	Mrtfa	Enhancers_Liver_31779
ENSFDAG00000009159	Mchr1	Enhancers_Liver_31779
ENSFDAG00000021492	Rbx1	Enhancers_Liver_31803
ENSFDAG00000010441	Xpnpep3	Enhancers_Liver_31803
ENSFDAG00000007313	Rangap1	Enhancers_Liver_31818
ENSFDAG00000008918	Chadl	Enhancers_Liver_31818
ENSFDAG00000008844	Polr3h	Enhancers_Liver_31846
ENSFDAG00000010448	Aco2	Enhancers_Liver_31846
ENSFDAG00000018263	Zfp957	Enhancers_Liver_31924,Enhancers_Liver_31925
ENSFDAG00000001321	Rrp7a	Enhancers_Liver_31924,Enhancers_Liver_31925
ENSFDAG00000002708	Parvg	Enhancers_Liver_32010,Enhancers_Liver_32014,Enhancers_Liver_32021
ENSFDAG00000006405	Parvb	Enhancers_Liver_32010,Enhancers_Liver_32014,Enhancers_Liver_32021
ENSFDAG00000010284	Arhgap8	Enhancers_Liver_32033
ENSFDAG00000010925	Shisal1	Enhancers_Liver_32033
ENSFDAG00000005433	Atxn10	Enhancers_Liver_32096,Enhancers_Liver_32097
ENSFDAG00000006258	Wnt7b	Enhancers_Liver_32096,Enhancers_Liver_32097
ENSFDAG00000010325	Ppara	Enhancers_Liver_32141
ENSFDAG00000019666	Cdpf1	Enhancers_Liver_32141
ENSFDAG00000002679	Celsr1	Enhancers_Liver_32155,Enhancers_Liver_32158,Enhancers_Liver_32159
ENSFDAG00000017472	Trmu	Enhancers_Liver_32155,Enhancers_Liver_32158,Enhancers_Liver_32159
ENSFDAG00000014478	Gramd4	Enhancers_Liver_32164
ENSFDAG00000010883	Cerk	Enhancers_Liver_32164
ENSFDAG00000010354	Tbc1d22a	Enhancers_Liver_32191,Enhancers_Liver_32198
ENSFDAG00000018919	Tafa5	Enhancers_Liver_32198,Enhancers_Liver_32209,Enhancers_Liver_32210,Enhancers_Liver_32219
ENSFDAG00000009300	Brd1	Enhancers_Liver_32209,Enhancers_Liver_32210,Enhancers_Liver_32219,Enhancers_Liver_32222
ENSFDAG00000011641	Zbed4	Enhancers_Liver_32222
ENSFDAG00000018469	Cpne8	Enhancers_Liver_32272
ENSFDAG00000019360	Alg10b	Enhancers_Liver_32272
ENSFDAG00000020339	Prickle1	Enhancers_Liver_32306
ENSFDAG00000007646	Adamts20	Enhancers_Liver_32306
ENSFDAG00000021455	Ano6	Enhancers_Liver_32359,Enhancers_Liver_32363,Enhancers_Liver_32367,Enhancers_Liver_32370,Enhancers_Liver_32371,Enhancers_Liver_32375
ENSFDAG00000000334	Arid2	Enhancers_Liver_32359,Enhancers_Liver_32363,Enhancers_Liver_32367,Enhancers_Liver_32370,Enhancers_Liver_32371,Enhancers_Liver_32375
ENSFDAG00000011618	Slc38a2	Enhancers_Liver_32405
ENSFDAG00000008153	N.A	Enhancers_Liver_32405,Enhancers_Liver_32463
ENSFDAG00000009679	Amigo2	Enhancers_Liver_32463
ENSFDAG00000017952	Tex49	Enhancers_Liver_32543
ENSFDAG00000021042	Adcy6	Enhancers_Liver_32543,Enhancers_Liver_32551
ENSFDAG00000008807	Cacnb3	Enhancers_Liver_32551
ENSFDAG00000017322	Tmbim6	Enhancers_Liver_32606
ENSFDAG00000016568	Nckap5l	Enhancers_Liver_32606,Enhancers_Liver_32609
ENSFDAG00000008477	Bcdin3d	Enhancers_Liver_32609
ENSFDAG00000015082	Scn8a	Enhancers_Liver_32713
ENSFDAG00000016585	Ankrd33	Enhancers_Liver_32713
ENSFDAG00000009187	N.A	Enhancers_Liver_32842
ENSFDAG00000013374	Gm28047	Enhancers_Liver_32842
ENSFDAG00000011158	Hoxc4	Enhancers_Liver_32856
ENSFDAG00000007491	Nckap1l	Enhancers_Liver_32888
ENSFDAG00000009787	Pde1b	Enhancers_Liver_32888,Enhancers_Liver_32890
ENSFDAG00000013050	Naa60	Enhancers_Liver_32906
ENSFDAG00000009423	N.A	Enhancers_Liver_32906
ENSFDAG00000019102	Tfap4	Enhancers_Liver_32959
ENSFDAG00000018538	Glis2	Enhancers_Liver_32959
ENSFDAG00000016305	Vasn	Enhancers_Liver_32966
ENSFDAG00000014709	Coro7	Enhancers_Liver_32966
ENSFDAG00000015668	Eef2kmt	Enhancers_Liver_33031
ENSFDAG00000007388	Rbfox1	Enhancers_Liver_33036
ENSFDAG00000013561	N.A	Enhancers_Liver_33083
ENSFDAG00000016627	Grin2a	Enhancers_Liver_33103,Enhancers_Liver_33114,Enhancers_Liver_33115,Enhancers_Liver_33123
ENSFDAG00000021400	Rpl39l	Enhancers_Liver_33103,Enhancers_Liver_33114,Enhancers_Liver_33115,Enhancers_Liver_33123
ENSFDAG00000001982	Emp2	Enhancers_Liver_33129,Enhancers_Liver_33134
ENSFDAG00000014110	Tekt5	Enhancers_Liver_33129,Enhancers_Liver_33134
ENSFDAG00000015164	Rmi2	Enhancers_Liver_33182
ENSFDAG00000012056	Litaf	Enhancers_Liver_33182
ENSFDAG00000018718	Snn	Enhancers_Liver_33211
ENSFDAG00000009541	Txndc11	Enhancers_Liver_33211
ENSFDAG00000005870	Snx29	Enhancers_Liver_33261
ENSFDAG00000011127	Cpped1	Enhancers_Liver_33261
ENSFDAG00000003610	Shisa9	Enhancers_Liver_33286
ENSFDAG00000013105	Ercc4	Enhancers_Liver_33286
ENSFDAG00000009819	Mrtfb	Enhancers_Liver_33328,Enhancers_Liver_33333,Enhancers_Liver_33335
ENSFDAG00000009234	Parn	Enhancers_Liver_33328,Enhancers_Liver_33333,Enhancers_Liver_33335
ENSFDAG00000021058	Bfar	Enhancers_Liver_33341
ENSFDAG00000000417	Pla2g10	Enhancers_Liver_33341
ENSFDAG00000013875	Abcc6	Enhancers_Liver_75238
ENSFDAG00000019547	Abcc1	Enhancers_Liver_75238
ENSFDAG00000001392	Fgd4	Enhancers_Liver_33441
ENSFDAG00000010166	Bicd1	Enhancers_Liver_33441
ENSFDAG00000008676	Mapk1	Enhancers_Liver_33467
ENSFDAG00000018695	Ypel1	Enhancers_Liver_33467
ENSFDAG00000011245	Hic2	Enhancers_Liver_33469
ENSFDAG00000014510	Klhl24	Enhancers_Liver_33561
ENSFDAG00000013730	Yeats2	Enhancers_Liver_33561,Enhancers_Liver_33572
ENSFDAG00000020254	Parl	Enhancers_Liver_33572
ENSFDAG00000010248	Ephb3	Enhancers_Liver_33601
ENSFDAG00000017323	N.A	Enhancers_Liver_33601
ENSFDAG00000009294	Vps8	Enhancers_Liver_33617
ENSFDAG00000015018	2510009E07Rik	Enhancers_Liver_33617
ENSFDAG00000012775	Tmem41a	Enhancers_Liver_33648
ENSFDAG00000005440	Map3k13	Enhancers_Liver_33648
ENSFDAG00000008432	Xxylt1	Enhancers_Liver_34167,Enhancers_Liver_34180
ENSFDAG00000017373	Lsg1	Enhancers_Liver_34167,Enhancers_Liver_34180
ENSFDAG00000018685	Bdh1	Enhancers_Liver_34251
ENSFDAG00000007182	Dlg1	Enhancers_Liver_34251
ENSFDAG00000018630	Tnk2	Enhancers_Liver_34325
ENSFDAG00000015535	Tfrc	Enhancers_Liver_34325
ENSFDAG00000014833	Gbe1	Enhancers_Liver_35373,Enhancers_Liver_35375
ENSFDAG00000008647	Cstdc5	Enhancers_Liver_34624
ENSFDAG00000002677	Pdxdc1	Enhancers_Liver_34624
ENSFDAG00000005950	Pdcd10	Enhancers_Liver_34670,Enhancers_Liver_34674,Enhancers_Liver_34675
ENSFDAG00000013978	Ndufb4	Enhancers_Liver_34670,Enhancers_Liver_34674,Enhancers_Liver_34675
ENSFDAG00000019517	Gsk3b	Enhancers_Liver_34724
ENSFDAG00000008368	Nr1i2	Enhancers_Liver_34724
ENSFDAG00000007432	Tmem39a	Enhancers_Liver_34755
ENSFDAG00000010940	Arhgap31	Enhancers_Liver_34755,Enhancers_Liver_34774,Enhancers_Liver_34775
ENSFDAG00000020840	Myo5b	Enhancers_Liver_34908
ENSFDAG00000021439	N.A	Enhancers_Liver_34908
ENSFDAG00000014997	Slc35a5	Enhancers_Liver_44335
ENSFDAG00000002448	Uhrf2	Enhancers_Liver_44335
ENSFDAG00000012594	Nectin3	Enhancers_Liver_35036
ENSFDAG00000000270	N.A	Enhancers_Liver_35165
ENSFDAG00000004229	Zpld1	Enhancers_Liver_35170
ENSFDAG00000017934	Nfkbiz	Enhancers_Liver_35170
ENSFDAG00000013479	Tfg	Enhancers_Liver_35225
ENSFDAG00000012407	Adgrg7	Enhancers_Liver_35225
ENSFDAG00000004165	Tomm70a	Enhancers_Liver_35231
ENSFDAG00000014339	Nit2	Enhancers_Liver_35231
ENSFDAG00000019873	Cadm2	Enhancers_Liver_35358
ENSFDAG00000015301	Robo2	Enhancers_Liver_35453
ENSFDAG00000000054	Nrip1	Enhancers_Liver_35487
ENSFDAG00000013121	Usp25	Enhancers_Liver_35487
ENSFDAG00000019616	Gabpa	Enhancers_Liver_35619,Enhancers_Liver_35627,Enhancers_Liver_35628,Enhancers_Liver_35635
ENSFDAG00000018450	App	Enhancers_Liver_35619,Enhancers_Liver_35627,Enhancers_Liver_35628,Enhancers_Liver_35635
ENSFDAG00000008945	Adamts5	Enhancers_Liver_35671,Enhancers_Liver_35676,Enhancers_Liver_35684
ENSFDAG00000012916	N6amt1	Enhancers_Liver_35676,Enhancers_Liver_35684,Enhancers_Liver_35697,Enhancers_Liver_35698,Enhancers_Liver_35703,Enhancers_Liver_35725
ENSFDAG00000010009	Cct8	Enhancers_Liver_35736,Enhancers_Liver_35737
ENSFDAG00000000365	N.A	Enhancers_Liver_35736,Enhancers_Liver_35737
ENSFDAG00000006385	Bach1	Enhancers_Liver_35757,Enhancers_Liver_35763,Enhancers_Liver_35764
ENSFDAG00000006265	Grik1	Enhancers_Liver_35763,Enhancers_Liver_35764
ENSFDAG00000017780	Scaf4	Enhancers_Liver_35810,Enhancers_Liver_35811,Enhancers_Liver_35812,Enhancers_Liver_35815
ENSFDAG00000009486	Hunk	Enhancers_Liver_35810,Enhancers_Liver_35811,Enhancers_Liver_35812,Enhancers_Liver_35815
ENSFDAG00000006552	Mrap	Enhancers_Liver_35819,Enhancers_Liver_35824
ENSFDAG00000007288	Urb1	Enhancers_Liver_35819,Enhancers_Liver_35824
ENSFDAG00000017672	Eva1c	Enhancers_Liver_35836
ENSFDAG00000011088	Cfap298	Enhancers_Liver_35836
ENSFDAG00000017284	Cryzl1	Enhancers_Liver_35954,Enhancers_Liver_35958
ENSFDAG00000017095	Atp5o	Enhancers_Liver_35954,Enhancers_Liver_35958
ENSFDAG00000018950	Kcne2	Enhancers_Liver_35970
ENSFDAG00000017979	Rcan1	Enhancers_Liver_35977
ENSFDAG00000017637	Kcne1	Enhancers_Liver_35977
ENSFDAG00000017254	Sim2	Enhancers_Liver_36066,Enhancers_Liver_36074
ENSFDAG00000019266	Cldn14	Enhancers_Liver_36066
ENSFDAG00000012907	Hlcs	Enhancers_Liver_36074
ENSFDAG00000008873	Ets2	Enhancers_Liver_36181,Enhancers_Liver_36183,Enhancers_Liver_36188
ENSFDAG00000019778	Psmg1	Enhancers_Liver_36181,Enhancers_Liver_36183,Enhancers_Liver_36188
ENSFDAG00000015740	Arid1b	Enhancers_Liver_36347
ENSFDAG00000005611	Zdhhc14	Enhancers_Liver_36425
ENSFDAG00000019452	Snx9	Enhancers_Liver_36425
ENSFDAG00000011738	Mpc1	Enhancers_Liver_36689
ENSFDAG00000016105	Rps6ka2	Enhancers_Liver_36502,Enhancers_Liver_36689
ENSFDAG00000015906	Rnaset2b	Enhancers_Liver_36502
ENSFDAG00000006081	Qki	Enhancers_Liver_36580
ENSFDAG00000011666	Pacrg	Enhancers_Liver_36580
ENSFDAG00000017270	Afdn	Enhancers_Liver_36707
ENSFDAG00000019773	N.A	Enhancers_Liver_36707
ENSFDAG00000007930	Gm3435	Enhancers_Liver_36757,Enhancers_Liver_53579
ENSFDAG00000014165	Dll1	Enhancers_Liver_36757,Enhancers_Liver_53579
ENSFDAG00000021121	Ahnak	Enhancers_Liver_43507,Enhancers_Liver_43509
ENSFDAG00000011443	Prss27	Enhancers_Liver_36821
ENSFDAG00000017083	Traf7	Enhancers_Liver_36864
ENSFDAG00000001704	Caskin1	Enhancers_Liver_36864
ENSFDAG00000011081	Ccdc154	Enhancers_Liver_36921
ENSFDAG00000007500	BC003965	Enhancers_Liver_36921
ENSFDAG00000012134	Unkl	Enhancers_Liver_36925
ENSFDAG00000009759	Gnptg	Enhancers_Liver_36925
ENSFDAG00000008576	Dusp1	Enhancers_Liver_36986,Enhancers_Liver_36988,Enhancers_Liver_36989,Enhancers_Liver_37004
ENSFDAG00000019143	Ergic1	Enhancers_Liver_37042
ENSFDAG00000017892	Atp6v0e	Enhancers_Liver_37042
ENSFDAG00000014680	Hnrnpm	Enhancers_Liver_37480,Enhancers_Liver_37482
ENSFDAG00000013884	Pram1	Enhancers_Liver_37480,Enhancers_Liver_37482
ENSFDAG00000017768	Egfl8	Enhancers_Liver_37530
ENSFDAG00000019163	Agpat1	Enhancers_Liver_37530
ENSFDAG00000018566	Trim10	Enhancers_Liver_37627
ENSFDAG00000008841	Trim26	Enhancers_Liver_37627
ENSFDAG00000013987	Bckdhb	Enhancers_Liver_87307
ENSFDAG00000002748	Vegfa	Enhancers_Liver_37801,Enhancers_Liver_37806,Enhancers_Liver_37827,Enhancers_Liver_37845,Enhancers_Liver_37846
ENSFDAG00000011684	Mrpl14	Enhancers_Liver_37801,Enhancers_Liver_37806,Enhancers_Liver_37827
ENSFDAG00000012875	Mrps18a	Enhancers_Liver_37845,Enhancers_Liver_37846
ENSFDAG00000008428	Polr1c	Enhancers_Liver_37863
ENSFDAG00000003835	Polh	Enhancers_Liver_37863
ENSFDAG00000015004	Crip3	Enhancers_Liver_37878
ENSFDAG00000018916	Zfp318	Enhancers_Liver_37878
ENSFDAG00000015273	Ptk7	Enhancers_Liver_37901
ENSFDAG00000008295	Mrpl2	Enhancers_Liver_37901
ENSFDAG00000013136	Klc4	Enhancers_Liver_37901
ENSFDAG00000011540	Ubr2	Enhancers_Liver_37923,Enhancers_Liver_37932
ENSFDAG00000016729	Prph2	Enhancers_Liver_37923
ENSFDAG00000006588	N.A	Enhancers_Liver_37932
ENSFDAG00000018222	Plcl2	Enhancers_Liver_38097,Enhancers_Liver_38100,Enhancers_Liver_38101,Enhancers_Liver_38102,Enhancers_Liver_38105
ENSFDAG00000006956	Tbc1d5	Enhancers_Liver_38097,Enhancers_Liver_38100,Enhancers_Liver_38101,Enhancers_Liver_38102,Enhancers_Liver_38105
ENSFDAG00000013681	Igbp1	Enhancers_Liver_38147
ENSFDAG00000006431	Efhb	Enhancers_Liver_38147
ENSFDAG00000005631	Rab5a	Enhancers_Liver_38149
ENSFDAG00000005940	Pp2d1	Enhancers_Liver_38149
ENSFDAG00000002189	Rfx2	Enhancers_Liver_38222
ENSFDAG00000008604	Ranbp3	Enhancers_Liver_38222
ENSFDAG00000018509	Nudt12	Enhancers_Liver_38255
ENSFDAG00000012942	Efna5	Enhancers_Liver_38299,Enhancers_Liver_38312
ENSFDAG00000005910	Fbxl17	Enhancers_Liver_38299,Enhancers_Liver_38312
ENSFDAG00000016684	Pja2	Enhancers_Liver_38366,Enhancers_Liver_38372,Enhancers_Liver_38374,Enhancers_Liver_38375,Enhancers_Liver_38379
ENSFDAG00000001784	Ralbp1	Enhancers_Liver_38462
ENSFDAG00000007486	Twsg1	Enhancers_Liver_38462,Enhancers_Liver_38468
ENSFDAG00000009623	Ankrd12	Enhancers_Liver_38468
ENSFDAG00000015291	Rab12	Enhancers_Liver_38502
ENSFDAG00000011352	Ptprm	Enhancers_Liver_38502,Enhancers_Liver_38506
ENSFDAG00000017835	Lama1	Enhancers_Liver_38527,Enhancers_Liver_38530
ENSFDAG00000016149	Arhgap28	Enhancers_Liver_38527,Enhancers_Liver_38530,Enhancers_Liver_38531,Enhancers_Liver_38533,Enhancers_Liver_38540,Enhancers_Liver_38543,Enhancers_Liver_38556
ENSFDAG00000020446	Epb41l3	Enhancers_Liver_38540,Enhancers_Liver_38543,Enhancers_Liver_38556
ENSFDAG00000004013	Alk	Enhancers_Liver_38642,Enhancers_Liver_38643
ENSFDAG00000002130	Ypel5	Enhancers_Liver_38642,Enhancers_Liver_38643,Enhancers_Liver_38651,Enhancers_Liver_38654
ENSFDAG00000007377	Lbh	Enhancers_Liver_38651,Enhancers_Liver_38654
ENSFDAG00000017192	Galnt14	Enhancers_Liver_38722
ENSFDAG00000017946	Ehd3	Enhancers_Liver_38722
ENSFDAG00000016897	Vit	Enhancers_Liver_38911
ENSFDAG00000003988	Strn	Enhancers_Liver_38911
ENSFDAG00000012049	N.A	Enhancers_Liver_38941
ENSFDAG00000005037	Cdc42ep3	Enhancers_Liver_38941,Enhancers_Liver_38942,Enhancers_Liver_38948,Enhancers_Liver_38950,Enhancers_Liver_38952
ENSFDAG00000009090	Rmdn2	Enhancers_Liver_38961
ENSFDAG00000007280	Atl2	Enhancers_Liver_39003
ENSFDAG00000012793	Hnrnpll	Enhancers_Liver_39003
ENSFDAG00000008104	Galm	Enhancers_Liver_39021,Enhancers_Liver_39024
ENSFDAG00000016030	N.A	Enhancers_Liver_39021,Enhancers_Liver_39024
ENSFDAG00000010373	Map4k3	Enhancers_Liver_39058,Enhancers_Liver_39086
ENSFDAG00000019324	Cdkl4	Enhancers_Liver_39058
ENSFDAG00000016462	Tmem178	Enhancers_Liver_39086
ENSFDAG00000014346	Pkdcc	Enhancers_Liver_39161,Enhancers_Liver_39169,Enhancers_Liver_39175
ENSFDAG00000000045	Eml4	Enhancers_Liver_39161,Enhancers_Liver_39169,Enhancers_Liver_39175
ENSFDAG00000006135	Tshz3	Enhancers_Liver_75052
ENSFDAG00000020531	Zfp536	Enhancers_Liver_75052
ENSFDAG00000016617	Plekhh2	Enhancers_Liver_39368
ENSFDAG00000017481	Dync2li1	Enhancers_Liver_39368
ENSFDAG00000013524	Prkce	Enhancers_Liver_39463,Enhancers_Liver_39502
ENSFDAG00000019389	Epas1	Enhancers_Liver_39463,Enhancers_Liver_39502,Enhancers_Liver_39554,Enhancers_Liver_39576,Enhancers_Liver_39577
ENSFDAG00000016832	Tmem247	Enhancers_Liver_39554,Enhancers_Liver_39576,Enhancers_Liver_39577,Enhancers_Liver_39589
ENSFDAG00000019156	Atp6v1e2	Enhancers_Liver_39589
ENSFDAG00000016496	Socs5	Enhancers_Liver_39603
ENSFDAG00000010599	Mcfd2	Enhancers_Liver_39603
ENSFDAG00000015825	Ttc7	Enhancers_Liver_39627
ENSFDAG00000020928	Stpg4	Enhancers_Liver_39627
ENSFDAG00000017622	Calm2	Enhancers_Liver_39661
ENSFDAG00000011539	N.A	Enhancers_Liver_39661
ENSFDAG00000010538	Foxn2	Enhancers_Liver_39688
ENSFDAG00000010412	Ppp1r21	Enhancers_Liver_39688,Enhancers_Liver_39691,Enhancers_Liver_39696
ENSFDAG00000008595	Ston1	Enhancers_Liver_39696
ENSFDAG00000021191	Lhcgr	Enhancers_Liver_39709
ENSFDAG00000014656	Fshr	Enhancers_Liver_39709
ENSFDAG00000015988	Pard3	Enhancers_Liver_83875,Enhancers_Liver_83884,Enhancers_Liver_83896,Enhancers_Liver_83905,Enhancers_Liver_83906,Enhancers_Liver_83907,Enhancers_Liver_83926,Enhancers_Liver_83938,Enhancers_Liver_83946
ENSFDAG00000013390	Lyzl1	Enhancers_Liver_39788
ENSFDAG00000012991	Map3k8	Enhancers_Liver_39788
ENSFDAG00000010014	Mkx	Enhancers_Liver_39944
ENSFDAG00000013729	Asrgl1	Enhancers_Liver_43507,Enhancers_Liver_43509
ENSFDAG00000013706	Ccdc7b	Enhancers_Liver_39982,Enhancers_Liver_39998
ENSFDAG00000019433	Fzd8	Enhancers_Liver_39982,Enhancers_Liver_39998
ENSFDAG00000012484	Rock1	Enhancers_Liver_40063,Enhancers_Liver_40064
ENSFDAG00000011775	Greb1l	Enhancers_Liver_40063,Enhancers_Liver_40064
ENSFDAG00000000290	Abhd3	Enhancers_Liver_40091
ENSFDAG00000011458	Mib1	Enhancers_Liver_40091,Enhancers_Liver_40098,Enhancers_Liver_40099,Enhancers_Liver_40123,Enhancers_Liver_40127,Enhancers_Liver_40128,Enhancers_Liver_40131,Enhancers_Liver_40132
ENSFDAG00000017620	Rbbp8	Enhancers_Liver_40098,Enhancers_Liver_40099,Enhancers_Liver_40123,Enhancers_Liver_40127,Enhancers_Liver_40128,Enhancers_Liver_40131,Enhancers_Liver_40132
ENSFDAG00000017361	Cables1	Enhancers_Liver_40155,Enhancers_Liver_40183
ENSFDAG00000015415	Tmem241	Enhancers_Liver_40183
ENSFDAG00000016560	Zfp521	Enhancers_Liver_40294,Enhancers_Liver_40297,Enhancers_Liver_40299
ENSFDAG00000018352	Hrh4	Enhancers_Liver_40294
ENSFDAG00000016570	Ss18	Enhancers_Liver_40297,Enhancers_Liver_40299
ENSFDAG00000006090	Cdh2	Enhancers_Liver_40358,Enhancers_Liver_40365,Enhancers_Liver_40374
ENSFDAG00000013871	Psme3ip1	Enhancers_Liver_40358
ENSFDAG00000011328	Dsg1a	Enhancers_Liver_40397
ENSFDAG00000006501	Dsc1	Enhancers_Liver_40397
ENSFDAG00000006598	Ttr	Enhancers_Liver_40431
ENSFDAG00000016200	B4galt6	Enhancers_Liver_40431
ENSFDAG00000012980	Garem1	Enhancers_Liver_40462,Enhancers_Liver_40463,Enhancers_Liver_40487
ENSFDAG00000013596	Klhl14	Enhancers_Liver_40487
ENSFDAG00000021141	Dtna	Enhancers_Liver_40513
ENSFDAG00000004907	Mapre2	Enhancers_Liver_40513
ENSFDAG00000018500	Ino80c	Enhancers_Liver_40539,Enhancers_Liver_40546
ENSFDAG00000006766	Zfp24	Enhancers_Liver_40539,Enhancers_Liver_40546
ENSFDAG00000015897	Galnt1	Enhancers_Liver_40550
ENSFDAG00000009793	Srp72	Enhancers_Liver_40550
ENSFDAG00000010551	2700062C07Rik	Enhancers_Liver_40553
ENSFDAG00000010392	Tpd52	Enhancers_Liver_40553
ENSFDAG00000020587	Wdr33	Enhancers_Liver_40618
ENSFDAG00000005449	Lims2	Enhancers_Liver_40618
ENSFDAG00000012086	Stard4	Enhancers_Liver_40681,Enhancers_Liver_40686
ENSFDAG00000014464	Nrep	Enhancers_Liver_40681,Enhancers_Liver_40686
ENSFDAG00000008942	Egr1	Enhancers_Liver_40726
ENSFDAG00000016056	Etf1	Enhancers_Liver_40726
ENSFDAG00000021535	Hspa9	Enhancers_Liver_40735
ENSFDAG00000012001	Ctnna1	Enhancers_Liver_40735
ENSFDAG00000011347	Lrrtm2	Enhancers_Liver_40772
ENSFDAG00000014162	Sil1	Enhancers_Liver_40772
ENSFDAG00000007809	Maskbp3	Enhancers_Liver_40834
ENSFDAG00000013042	Eif4ebp3	Enhancers_Liver_40834
ENSFDAG00000018945	Arap3	Enhancers_Liver_40888,Enhancers_Liver_40892,Enhancers_Liver_40900
ENSFDAG00000003084	Pcdh1	Enhancers_Liver_40888,Enhancers_Liver_40892,Enhancers_Liver_40900
ENSFDAG00000015929	Spry4	Enhancers_Liver_40984,Enhancers_Liver_40993,Enhancers_Liver_40997,Enhancers_Liver_40999,Enhancers_Liver_41001
ENSFDAG00000010332	Fgf1	Enhancers_Liver_40984,Enhancers_Liver_40993,Enhancers_Liver_40997,Enhancers_Liver_40999,Enhancers_Liver_41001
ENSFDAG00000013951	Arhgap26	Enhancers_Liver_41097,Enhancers_Liver_41111
ENSFDAG00000019570	Nr3c1	Enhancers_Liver_41097,Enhancers_Liver_41111,Enhancers_Liver_41146,Enhancers_Liver_41157,Enhancers_Liver_41170,Enhancers_Liver_41173,Enhancers_Liver_41176
ENSFDAG00000013503	Yipf5	Enhancers_Liver_41146,Enhancers_Liver_41157,Enhancers_Liver_41170,Enhancers_Liver_41173,Enhancers_Liver_41176
ENSFDAG00000018514	Kctd16	Enhancers_Liver_41222
ENSFDAG00000012575	Prelid2	Enhancers_Liver_41222
ENSFDAG00000021292	Dcp2	Enhancers_Liver_41298,Enhancers_Liver_41309,Enhancers_Liver_41323,Enhancers_Liver_41328
ENSFDAG00000001200	Mcc	Enhancers_Liver_41298,Enhancers_Liver_41309,Enhancers_Liver_41323,Enhancers_Liver_41328
ENSFDAG00000000927	Kcnn2	Enhancers_Liver_41344,Enhancers_Liver_41347,Enhancers_Liver_41358,Enhancers_Liver_41359,Enhancers_Liver_41362,Enhancers_Liver_41384
ENSFDAG00000021119	Trim36	Enhancers_Liver_41344,Enhancers_Liver_41347,Enhancers_Liver_41358,Enhancers_Liver_41359,Enhancers_Liver_41362,Enhancers_Liver_41384
ENSFDAG00000006140	Tnfaip8	Enhancers_Liver_41516
ENSFDAG00000013528	Dmxl1	Enhancers_Liver_41516
ENSFDAG00000006483	Prdm6	Enhancers_Liver_41610,Enhancers_Liver_41612,Enhancers_Liver_41613,Enhancers_Liver_41616,Enhancers_Liver_41617,Enhancers_Liver_41618,Enhancers_Liver_41621
ENSFDAG00000001171	Cep120	Enhancers_Liver_41610,Enhancers_Liver_41612,Enhancers_Liver_41613,Enhancers_Liver_41616,Enhancers_Liver_41617,Enhancers_Liver_41618,Enhancers_Liver_41621
ENSFDAG00000007522	Zfp608	Enhancers_Liver_41664
ENSFDAG00000008011	Cry1	Enhancers_Liver_41664
ENSFDAG00000018310	Lmnb1	Enhancers_Liver_41778,Enhancers_Liver_41788,Enhancers_Liver_41789
ENSFDAG00000010811	Marchf3	Enhancers_Liver_41778,Enhancers_Liver_41788,Enhancers_Liver_41789,Enhancers_Liver_41792
ENSFDAG00000018053	C330018D20Rik	Enhancers_Liver_41792
ENSFDAG00000012794	Ndst1	Enhancers_Liver_41924
ENSFDAG00000006514	Rps14	Enhancers_Liver_41924
ENSFDAG00000001028	Hmgxb3	Enhancers_Liver_41975
ENSFDAG00000005307	Slc26a2	Enhancers_Liver_41975
ENSFDAG00000008719	Ppargc1b	Enhancers_Liver_41979,Enhancers_Liver_42018
ENSFDAG00000011817	Pde6a	Enhancers_Liver_41979
ENSFDAG00000017008	Arhgef37	Enhancers_Liver_42018
ENSFDAG00000012450	Il17b	Enhancers_Liver_42061,Enhancers_Liver_42062
ENSFDAG00000014242	Pcyox1l	Enhancers_Liver_42061,Enhancers_Liver_42062
ENSFDAG00000000343	Afap1l1	Enhancers_Liver_42069,Enhancers_Liver_42094,Enhancers_Liver_42095
ENSFDAG00000000157	Grpel2	Enhancers_Liver_42069
ENSFDAG00000016434	Ablim3	Enhancers_Liver_42094,Enhancers_Liver_42095,Enhancers_Liver_42114,Enhancers_Liver_42115
ENSFDAG00000019580	Sh3tc2	Enhancers_Liver_42114,Enhancers_Liver_42115
ENSFDAG00000010782	Napg	Enhancers_Liver_42175
ENSFDAG00000017309	Piezo2	Enhancers_Liver_42175
ENSFDAG00000003357	Tcf4	Enhancers_Liver_42498
ENSFDAG00000016915	Onecut2	Enhancers_Liver_42221
ENSFDAG00000009263	Fech	Enhancers_Liver_42221
ENSFDAG00000014404	Socs6	Enhancers_Liver_42278
ENSFDAG00000000579	Nedd4l	Enhancers_Liver_42278,Enhancers_Liver_42340
ENSFDAG00000000368	Alpk2	Enhancers_Liver_42340
ENSFDAG00000008511	Ak9	Enhancers_Liver_42477
ENSFDAG00000009165	Rnmt	Enhancers_Liver_42477
ENSFDAG00000000043	Ccdc68	Enhancers_Liver_42498
ENSFDAG00000018480	Pabpc2	Enhancers_Liver_42570
ENSFDAG00000009406	Acaa2	Enhancers_Liver_42639
ENSFDAG00000008217	Lipg	Enhancers_Liver_42639
ENSFDAG00000017680	Smad7	Enhancers_Liver_42688
ENSFDAG00000017379	Ctif	Enhancers_Liver_42688,Enhancers_Liver_42741,Enhancers_Liver_42746
ENSFDAG00000018792	Zbtb7c	Enhancers_Liver_42741,Enhancers_Liver_42746,Enhancers_Liver_42758,Enhancers_Liver_42761
ENSFDAG00000002894	Smad2	Enhancers_Liver_42758,Enhancers_Liver_42761
ENSFDAG00000015483	Atp5a1	Enhancers_Liver_42786
ENSFDAG00000004828	Haus1	Enhancers_Liver_42786
ENSFDAG00000005915	Slc14a1	Enhancers_Liver_42804,Enhancers_Liver_42811
ENSFDAG00000012230	Slc14a2	Enhancers_Liver_42804,Enhancers_Liver_42811,Enhancers_Liver_42824,Enhancers_Liver_42831,Enhancers_Liver_42834
ENSFDAG00000005607	Setbp1	Enhancers_Liver_42824,Enhancers_Liver_42831,Enhancers_Liver_42834
ENSFDAG00000004148	Hsbp1l1	Enhancers_Liver_42869
ENSFDAG00000001527	N.A	Enhancers_Liver_42869
ENSFDAG00000013046	Ctdp1	Enhancers_Liver_42897
ENSFDAG00000014978	Nfatc1	Enhancers_Liver_42897
ENSFDAG00000014648	Zfp516	Enhancers_Liver_42949,Enhancers_Liver_42952
ENSFDAG00000017359	Gal	Enhancers_Liver_43079,Enhancers_Liver_43081
ENSFDAG00000002642	Ppp6r3	Enhancers_Liver_43079,Enhancers_Liver_43081
ENSFDAG00000013103	Ndufs8	Enhancers_Liver_43145
ENSFDAG00000008070	Aldh3b1	Enhancers_Liver_43145
ENSFDAG00000009433	Cabp4	Enhancers_Liver_43157
ENSFDAG00000012631	Gpr152	Enhancers_Liver_43157
ENSFDAG00000017795	Ankrd13d	Enhancers_Liver_43177
ENSFDAG00000007129	Rce1	Enhancers_Liver_43235
ENSFDAG00000017093	Gm960	Enhancers_Liver_43235
ENSFDAG00000009432	Kcnk7	Enhancers_Liver_43293
ENSFDAG00000010891	Naaladl1	Enhancers_Liver_43345
ENSFDAG00000015766	Snx15	Enhancers_Liver_43345
ENSFDAG00000004101	Batf2	Enhancers_Liver_43353
ENSFDAG00000002804	Majin	Enhancers_Liver_43356
ENSFDAG00000018602	Ppp2r5b	Enhancers_Liver_43356
ENSFDAG00000007907	Atg2a	Enhancers_Liver_43362
ENSFDAG00000007697	Ehd1	Enhancers_Liver_43362,Enhancers_Liver_43372
ENSFDAG00000007176	Cdc42bpg	Enhancers_Liver_43372
ENSFDAG00000015716	Stip1	Enhancers_Liver_43412
ENSFDAG00000009549	Flrt1	Enhancers_Liver_43412
ENSFDAG00000011226	Naa40	Enhancers_Liver_43439,Enhancers_Liver_43441
ENSFDAG00000000973	Rcor2	Enhancers_Liver_43443,Enhancers_Liver_43444
ENSFDAG00000018435	Mark2	Enhancers_Liver_43444
ENSFDAG00000015147	Myrf	Enhancers_Liver_43555
ENSFDAG00000010498	Dagla	Enhancers_Liver_43555
ENSFDAG00000008761	Syt7	Enhancers_Liver_43571
ENSFDAG00000017145	Ppp1r32	Enhancers_Liver_43571
ENSFDAG00000011601	Osbp	Enhancers_Liver_43629
ENSFDAG00000018061	N.A	Enhancers_Liver_43629
ENSFDAG00000014066	Lpxn	Enhancers_Liver_43677
ENSFDAG00000010677	Olfr1448	Enhancers_Liver_43677
ENSFDAG00000013686	N.A	Enhancers_Liver_43697
ENSFDAG00000011312	Psat1	Enhancers_Liver_43697
ENSFDAG00000018106	N.A	Enhancers_Liver_43723
ENSFDAG00000004600	Carnmt1	Enhancers_Liver_43801
ENSFDAG00000013491	Trpm6	Enhancers_Liver_43801
ENSFDAG00000009487	Aldh1a1	Enhancers_Liver_43853
ENSFDAG00000018867	N.A	Enhancers_Liver_43853
ENSFDAG00000013372	Cemip2	Enhancers_Liver_43925
ENSFDAG00000012083	Trpm3	Enhancers_Liver_43925,Enhancers_Liver_43976
ENSFDAG00000008457	Klf9	Enhancers_Liver_43976
ENSFDAG00000018921	Fam189a2	Enhancers_Liver_44049
ENSFDAG00000017017	Tjp2	Enhancers_Liver_44049
ENSFDAG00000015908	Kank1	Enhancers_Liver_44133,Enhancers_Liver_44141
ENSFDAG00000005670	Dmrt1	Enhancers_Liver_44141
ENSFDAG00000000992	Ak3	Enhancers_Liver_44252
ENSFDAG00000015046	Cdc37l1	Enhancers_Liver_44252
ENSFDAG00000006638	9930021J03Rik	Enhancers_Liver_44314
ENSFDAG00000016780	Mlana	Enhancers_Liver_44314
ENSFDAG00000009747	Dkk1	Enhancers_Liver_44373
ENSFDAG00000021170	Cstf2t	Enhancers_Liver_44373,Enhancers_Liver_44383,Enhancers_Liver_44384
ENSFDAG00000008826	Prkg1	Enhancers_Liver_44383,Enhancers_Liver_44384
ENSFDAG00000019371	A1cf	Enhancers_Liver_44425
ENSFDAG00000005984	Asah2	Enhancers_Liver_44425,Enhancers_Liver_44440
ENSFDAG00000012550	Sgms1	Enhancers_Liver_44440
ENSFDAG00000004696	Pten	Enhancers_Liver_44566,Enhancers_Liver_44586,Enhancers_Liver_44587,Enhancers_Liver_44596
ENSFDAG00000002016	Rnls	Enhancers_Liver_44566,Enhancers_Liver_44586,Enhancers_Liver_44587,Enhancers_Liver_44596
ENSFDAG00000014562	Stambpl1	Enhancers_Liver_44614
ENSFDAG00000014772	Acta2	Enhancers_Liver_44614
ENSFDAG00000017980	Btaf1	Enhancers_Liver_44759,Enhancers_Liver_44761,Enhancers_Liver_44771,Enhancers_Liver_44772,Enhancers_Liver_44774,Enhancers_Liver_44778
ENSFDAG00000016459	Cpeb3	Enhancers_Liver_44759,Enhancers_Liver_44761,Enhancers_Liver_44771,Enhancers_Liver_44772,Enhancers_Liver_44774,Enhancers_Liver_44778
ENSFDAG00000012451	Ide	Enhancers_Liver_44797,Enhancers_Liver_44798
ENSFDAG00000008925	Marchf5	Enhancers_Liver_44797,Enhancers_Liver_44798
ENSFDAG00000019030	Cyp26a1	Enhancers_Liver_44831,Enhancers_Liver_44832,Enhancers_Liver_44845
ENSFDAG00000021206	Myof	Enhancers_Liver_44845
ENSFDAG00000020893	Fra10ac1	Enhancers_Liver_44862
ENSFDAG00000013565	Pde6c	Enhancers_Liver_44862
ENSFDAG00000001770	Sfrp5	Enhancers_Liver_45157
ENSFDAG00000000311	Golga7b	Enhancers_Liver_45157
ENSFDAG00000019038	Pkd2l1	Enhancers_Liver_45298
ENSFDAG00000017904	N.A	Enhancers_Liver_45298,Enhancers_Liver_45301,Enhancers_Liver_45308
ENSFDAG00000006085	Syce1	Enhancers_Liver_45301,Enhancers_Liver_45308
ENSFDAG00000010750	Btrc	Enhancers_Liver_45351
ENSFDAG00000016447	Poll	Enhancers_Liver_45351
ENSFDAG00000000632	Rpl7	Enhancers_Liver_45369
ENSFDAG00000001905	Armh3	Enhancers_Liver_45369
ENSFDAG00000020013	Trim8	Enhancers_Liver_45419
ENSFDAG00000006628	Arl3	Enhancers_Liver_45419
ENSFDAG00000010895	Ina	Enhancers_Liver_45471,Enhancers_Liver_45472
ENSFDAG00000014221	Pcgf6	Enhancers_Liver_45471,Enhancers_Liver_45472
ENSFDAG00000013994	Neurl1a	Enhancers_Liver_45490,Enhancers_Liver_45491
ENSFDAG00000011219	Sh3pxd2a	Enhancers_Liver_45490,Enhancers_Liver_45491,Enhancers_Liver_45518
ENSFDAG00000007528	Stn1	Enhancers_Liver_45518
ENSFDAG00000007840	Sfr1	Enhancers_Liver_45536
ENSFDAG00000014625	Cfap43	Enhancers_Liver_45536
ENSFDAG00000011317	Sorcs3	Enhancers_Liver_45565
ENSFDAG00000004873	Adrb1	Enhancers_Liver_45832
ENSFDAG00000018206	Nhlrc2	Enhancers_Liver_45832
ENSFDAG00000020690	Fhip2a	Enhancers_Liver_45906
ENSFDAG00000008140	Trub1	Enhancers_Liver_45906
ENSFDAG00000005563	Gfra1	Enhancers_Liver_45940
ENSFDAG00000014074	Rsrc2	Enhancers_Liver_45940
ENSFDAG00000006454	Eno4	Enhancers_Liver_45975
ENSFDAG00000011605	1700019N19Rik	Enhancers_Liver_45975
ENSFDAG00000017453	Hspa12a	Enhancers_Liver_45985,Enhancers_Liver_45986
ENSFDAG00000001619	Shtn1	Enhancers_Liver_45985,Enhancers_Liver_45986
ENSFDAG00000017239	Nmt2	Enhancers_Liver_46083
ENSFDAG00000018669	Rpp38	Enhancers_Liver_46083
ENSFDAG00000016616	N.A	Enhancers_Liver_46183
ENSFDAG00000018837	Sephs1	Enhancers_Liver_46183
ENSFDAG00000014348	Upf2	Enhancers_Liver_46286
ENSFDAG00000002967	Proser2	Enhancers_Liver_46286,Enhancers_Liver_46297,Enhancers_Liver_46299,Enhancers_Liver_46300,Enhancers_Liver_46301
ENSFDAG00000003256	Echdc3	Enhancers_Liver_46297,Enhancers_Liver_46299,Enhancers_Liver_46300,Enhancers_Liver_46301,Enhancers_Liver_46306,Enhancers_Liver_46307
ENSFDAG00000017916	Pcnp	Enhancers_Liver_46307,Enhancers_Liver_46321
ENSFDAG00000016032	Usp6nl	Enhancers_Liver_46321
ENSFDAG00000015074	Celf2	Enhancers_Liver_46350
ENSFDAG00000007470	Rbm17	Enhancers_Liver_46444,Enhancers_Liver_46445
ENSFDAG00000009830	Fbh1	Enhancers_Liver_46444,Enhancers_Liver_46445
ENSFDAG00000010860	Arl5b	Enhancers_Liver_46565
ENSFDAG00000020843	Malrd1	Enhancers_Liver_46565
ENSFDAG00000007826	Amz2	Enhancers_Liver_46628
ENSFDAG00000000800	Dnajc1	Enhancers_Liver_46628
ENSFDAG00000015332	Msrb2	Enhancers_Liver_46680,Enhancers_Liver_46688,Enhancers_Liver_46689,Enhancers_Liver_46691,Enhancers_Liver_46692,Enhancers_Liver_46693,Enhancers_Liver_46698,Enhancers_Liver_46699,Enhancers_Liver_46700,Enhancers_Liver_46705,Enhancers_Liver_46714,Enhancers_Liver_46715,Enhancers_Liver_46720
ENSFDAG00000015648	Etl4	Enhancers_Liver_46680,Enhancers_Liver_46688,Enhancers_Liver_46689,Enhancers_Liver_46691,Enhancers_Liver_46692,Enhancers_Liver_46693,Enhancers_Liver_46698,Enhancers_Liver_46699,Enhancers_Liver_46700,Enhancers_Liver_46705,Enhancers_Liver_46714,Enhancers_Liver_46715,Enhancers_Liver_46720,Enhancers_Liver_46749
ENSFDAG00000011901	Arhgap21	Enhancers_Liver_46749,Enhancers_Liver_46771
ENSFDAG00000000154	Enkur	Enhancers_Liver_46771,Enhancers_Liver_46793
ENSFDAG00000014234	Thnsl1	Enhancers_Liver_46793
ENSFDAG00000006809	Gpr158	Enhancers_Liver_46799
ENSFDAG00000011284	Myo3a	Enhancers_Liver_46799
ENSFDAG00000016586	Spopl	Enhancers_Liver_46841
ENSFDAG00000003637	Rrm1	Enhancers_Liver_77375,Enhancers_Liver_77377,Enhancers_Liver_77390
ENSFDAG00000015203	Stim1	Enhancers_Liver_77375,Enhancers_Liver_77377,Enhancers_Liver_77390
ENSFDAG00000006244	Hnmt	Enhancers_Liver_46841
ENSFDAG00000011771	Il1rn	Enhancers_Liver_46850,Enhancers_Liver_46851,Enhancers_Liver_46852,Enhancers_Liver_46854,Enhancers_Liver_46858
ENSFDAG00000005885	Il1f10	Enhancers_Liver_46850,Enhancers_Liver_46851,Enhancers_Liver_46852,Enhancers_Liver_46854,Enhancers_Liver_46858
ENSFDAG00000005505	Npdc1	Enhancers_Liver_46926
ENSFDAG00000017161	Lcn10	Enhancers_Liver_47011
ENSFDAG00000018172	Dipk1b	Enhancers_Liver_47011
ENSFDAG00000003505	Sardh	Enhancers_Liver_47053
ENSFDAG00000016790	Vav2	Enhancers_Liver_47053,Enhancers_Liver_47063
ENSFDAG00000015163	Tsc1	Enhancers_Liver_47144
ENSFDAG00000007162	Spaca9	Enhancers_Liver_47144
ENSFDAG00000014773	Sptan1	Enhancers_Liver_47218,Enhancers_Liver_47219,Enhancers_Liver_47222
ENSFDAG00000000986	Dync2i2	Enhancers_Liver_47218,Enhancers_Liver_47219,Enhancers_Liver_47222
ENSFDAG00000014803	Phyhd1	Enhancers_Liver_47244
ENSFDAG00000018539	Nup188	Enhancers_Liver_47244
ENSFDAG00000012591	Ptpa	Enhancers_Liver_47280,Enhancers_Liver_47281
ENSFDAG00000004758	Ntmt1	Enhancers_Liver_47280,Enhancers_Liver_47281
ENSFDAG00000017724	Fam102a	Enhancers_Liver_47401
ENSFDAG00000016340	Dpm2	Enhancers_Liver_47401
ENSFDAG00000018058	Pip5kl1	Enhancers_Liver_47412,Enhancers_Liver_47415
ENSFDAG00000009758	St6galnac4	Enhancers_Liver_47415
ENSFDAG00000021065	Stxbp1	Enhancers_Liver_47457
ENSFDAG00000005924	Cfap157	Enhancers_Liver_47457
ENSFDAG00000008256	Garnl3	Enhancers_Liver_47481
ENSFDAG00000015903	Angptl2	Enhancers_Liver_47481,Enhancers_Liver_47507,Enhancers_Liver_47509,Enhancers_Liver_47510
ENSFDAG00000014915	Ralgps1	Enhancers_Liver_47507,Enhancers_Liver_47509,Enhancers_Liver_47510
ENSFDAG00000009068	Lmx1b	Enhancers_Liver_47537
ENSFDAG00000014765	Mvb12b	Enhancers_Liver_47537
ENSFDAG00000005706	Mapkap1	Enhancers_Liver_47577
ENSFDAG00000000786	Gapvd1	Enhancers_Liver_47577
ENSFDAG00000010567	Ggta1	Enhancers_Liver_47658
ENSFDAG00000017614	Dab2ip	Enhancers_Liver_47658,Enhancers_Liver_47673,Enhancers_Liver_47680
ENSFDAG00000011636	Ttll11	Enhancers_Liver_47673,Enhancers_Liver_47680
ENSFDAG00000012679	Rbm18	Enhancers_Liver_47702
ENSFDAG00000012805	Ptgs1	Enhancers_Liver_47702
ENSFDAG00000019034	Nr5a1	Enhancers_Liver_47818,Enhancers_Liver_47827
ENSFDAG00000021444	Nr6a1	Enhancers_Liver_47818,Enhancers_Liver_47827
ENSFDAG00000014586	Lrp1b	Enhancers_Liver_47864,Enhancers_Liver_47865
ENSFDAG00000010773	Arhgap15	Enhancers_Liver_47908
ENSFDAG00000018254	Gtdc1	Enhancers_Liver_47908,Enhancers_Liver_47943
ENSFDAG00000004686	Zeb2	Enhancers_Liver_47943
ENSFDAG00000001117	Acvr2a	Enhancers_Liver_48032,Enhancers_Liver_48064,Enhancers_Liver_48065,Enhancers_Liver_48066,Enhancers_Liver_48067,Enhancers_Liver_48071
ENSFDAG00000005573	Orc4	Enhancers_Liver_48071
ENSFDAG00000013124	Lypd6	Enhancers_Liver_48096
ENSFDAG00000019104	Mmadhc	Enhancers_Liver_48096,Enhancers_Liver_48110,Enhancers_Liver_48130
ENSFDAG00000008589	Rnd3	Enhancers_Liver_48110,Enhancers_Liver_48130
ENSFDAG00000004623	Stam2	Enhancers_Liver_48231,Enhancers_Liver_48241
ENSFDAG00000016001	Fmnl2	Enhancers_Liver_48231,Enhancers_Liver_48241
ENSFDAG00000010008	Nr4a2	Enhancers_Liver_48280
ENSFDAG00000012700	Gpd2	Enhancers_Liver_48280,Enhancers_Liver_48292
ENSFDAG00000010528	Snrpn	Enhancers_Liver_48292
ENSFDAG00000017127	Pkp4	Enhancers_Liver_48371
ENSFDAG00000001796	Dapl1	Enhancers_Liver_48371
ENSFDAG00000000093	Tanc1	Enhancers_Liver_48408,Enhancers_Liver_48412,Enhancers_Liver_48414
ENSFDAG00000012994	Wdsub1	Enhancers_Liver_48408,Enhancers_Liver_48412,Enhancers_Liver_48414,Enhancers_Liver_48432
ENSFDAG00000009492	Baz2b	Enhancers_Liver_48432
ENSFDAG00000017441	Hnrnpr	Enhancers_Liver_48439
ENSFDAG00000014528	Marchf7	Enhancers_Liver_48439
ENSFDAG00000015692	Rbms1	Enhancers_Liver_48510,Enhancers_Liver_48516,Enhancers_Liver_48517
ENSFDAG00000010413	Tank	Enhancers_Liver_48510,Enhancers_Liver_48516,Enhancers_Liver_48517
ENSFDAG00000014550	Fign	Enhancers_Liver_48586
ENSFDAG00000006600	Grb14	Enhancers_Liver_48586,Enhancers_Liver_48591,Enhancers_Liver_48608
ENSFDAG00000000913	Cobll1	Enhancers_Liver_48591,Enhancers_Liver_48608
ENSFDAG00000012421	Galnt3	Enhancers_Liver_48661
ENSFDAG00000010296	Ttc21b	Enhancers_Liver_48661
ENSFDAG00000018472	Xirp2	Enhancers_Liver_48671
ENSFDAG00000017530	B3galt1	Enhancers_Liver_48671,Enhancers_Liver_48705,Enhancers_Liver_48708,Enhancers_Liver_48714
ENSFDAG00000011416	Stk39	Enhancers_Liver_48705,Enhancers_Liver_48708,Enhancers_Liver_48714
ENSFDAG00000014343	Cers6	Enhancers_Liver_48727,Enhancers_Liver_48731,Enhancers_Liver_48739,Enhancers_Liver_48745,Enhancers_Liver_48748,Enhancers_Liver_48749
ENSFDAG00000006444	Nostrin	Enhancers_Liver_48727,Enhancers_Liver_48731,Enhancers_Liver_48739,Enhancers_Liver_48745,Enhancers_Liver_48748,Enhancers_Liver_48749
ENSFDAG00000016825	Abcb11	Enhancers_Liver_48779
ENSFDAG00000018836	Dhrs9	Enhancers_Liver_48779
ENSFDAG00000013649	Wipf1	Enhancers_Liver_48988
ENSFDAG00000006685	N.A	Enhancers_Liver_49078
ENSFDAG00000011998	Ttc30a2	Enhancers_Liver_49129
ENSFDAG00000021204	Pde11a	Enhancers_Liver_49129
ENSFDAG00000021152	Ccdc141	Enhancers_Liver_49171
ENSFDAG00000014276	Sestd1	Enhancers_Liver_49171,Enhancers_Liver_49174,Enhancers_Liver_49192
ENSFDAG00000021322	Zfp385b	Enhancers_Liver_49192
ENSFDAG00000012194	Neurod1	Enhancers_Liver_49233
ENSFDAG00000016345	Itprid2	Enhancers_Liver_49233,Enhancers_Liver_49234
ENSFDAG00000011491	Ppp1r1c	Enhancers_Liver_49234
ENSFDAG00000017041	Cdc42	Enhancers_Liver_49264
ENSFDAG00000013457	Dnajc10	Enhancers_Liver_49264
ENSFDAG00000017998	Nup35	Enhancers_Liver_49287,Enhancers_Liver_49295,Enhancers_Liver_49298
ENSFDAG00000009540	Zswim2	Enhancers_Liver_49322
ENSFDAG00000018059	Calcrl	Enhancers_Liver_49322
ENSFDAG00000017134	Arfgap2	Enhancers_Liver_49499,Enhancers_Liver_49504,Enhancers_Liver_49506,Enhancers_Liver_49507
ENSFDAG00000015253	Cstpp1	Enhancers_Liver_49499,Enhancers_Liver_49504,Enhancers_Liver_49506,Enhancers_Liver_49507
ENSFDAG00000016167	Prdm11	Enhancers_Liver_49614,Enhancers_Liver_49618,Enhancers_Liver_49619,Enhancers_Liver_49631
ENSFDAG00000010691	Trp53i11	Enhancers_Liver_49614,Enhancers_Liver_49618,Enhancers_Liver_49619,Enhancers_Liver_49631
ENSFDAG00000008306	Tspan18	Enhancers_Liver_49640,Enhancers_Liver_49651,Enhancers_Liver_49652,Enhancers_Liver_49653,Enhancers_Liver_49655,Enhancers_Liver_49657,Enhancers_Liver_49658,Enhancers_Liver_49664,Enhancers_Liver_49665
ENSFDAG00000020524	Cd82	Enhancers_Liver_49640,Enhancers_Liver_49651,Enhancers_Liver_49652,Enhancers_Liver_49653,Enhancers_Liver_49655,Enhancers_Liver_49657,Enhancers_Liver_49658,Enhancers_Liver_49664,Enhancers_Liver_49665
ENSFDAG00000005795	Alx4	Enhancers_Liver_49681,Enhancers_Liver_49692,Enhancers_Liver_49693,Enhancers_Liver_49700
ENSFDAG00000010533	Ext2	Enhancers_Liver_49681,Enhancers_Liver_49692,Enhancers_Liver_49693,Enhancers_Liver_49700
ENSFDAG00000016366	Gm13889	Enhancers_Liver_49717,Enhancers_Liver_49718,Enhancers_Liver_49721
ENSFDAG00000012666	Gm27027	Enhancers_Liver_49717,Enhancers_Liver_49718,Enhancers_Liver_49721,Enhancers_Liver_49734,Enhancers_Liver_49735
ENSFDAG00000006866	Hsd17b12	Enhancers_Liver_49734,Enhancers_Liver_49735
ENSFDAG00000007077	Api5	Enhancers_Liver_49760
ENSFDAG00000015466	Caprin1	Enhancers_Liver_49969,Enhancers_Liver_49973
ENSFDAG00000005803	Lmo2	Enhancers_Liver_49969,Enhancers_Liver_49973
ENSFDAG00000011573	Eif3m	Enhancers_Liver_50033,Enhancers_Liver_50034
ENSFDAG00000006720	Wt1	Enhancers_Liver_50033,Enhancers_Liver_50034,Enhancers_Liver_50039
ENSFDAG00000009748	Rcn1	Enhancers_Liver_50039
ENSFDAG00000016775	Lin7c	Enhancers_Liver_50087
ENSFDAG00000015854	Bbox1	Enhancers_Liver_50087
ENSFDAG00000010214	Lpcat4	Enhancers_Liver_50120
ENSFDAG00000019067	Nutm1	Enhancers_Liver_50120
ENSFDAG00000007920	Gm21985	Enhancers_Liver_50124,Enhancers_Liver_50126
ENSFDAG00000015877	Emc4	Enhancers_Liver_50124,Enhancers_Liver_50126,Enhancers_Liver_50127
ENSFDAG00000008442	Katnbl1	Enhancers_Liver_50127
ENSFDAG00000010073	Col6a6	Enhancers_Liver_87948
ENSFDAG00000005642	Hypk	Enhancers_Liver_50404
ENSFDAG00000016974	Sord	Enhancers_Liver_50433
ENSFDAG00000018742	Gatm	Enhancers_Liver_50449
ENSFDAG00000012811	Slc30a4	Enhancers_Liver_50449
ENSFDAG00000016793	Secisbp2l	Enhancers_Liver_50545
ENSFDAG00000003281	Cops2	Enhancers_Liver_50545
ENSFDAG00000008152	Usp50	Enhancers_Liver_50605
ENSFDAG00000019191	Trpm7	Enhancers_Liver_50605
ENSFDAG00000008674	Ncaph	Enhancers_Liver_50631
ENSFDAG00000011725	Fbln7	Enhancers_Liver_50735
ENSFDAG00000001021	Zc3h8	Enhancers_Liver_50735
ENSFDAG00000008777	Slc20a1	Enhancers_Liver_50740,Enhancers_Liver_50741
ENSFDAG00000003958	Chchd5	Enhancers_Liver_50740,Enhancers_Liver_50741
ENSFDAG00000005600	Sirpb1c	Enhancers_Liver_50796
ENSFDAG00000012664	F830045P16Rik	Enhancers_Liver_50796
ENSFDAG00000009180	Stk3	Enhancers_Liver_50926
ENSFDAG00000011169	Prnp	Enhancers_Liver_50926
ENSFDAG00000005794	Lrrn4	Enhancers_Liver_51017
ENSFDAG00000008711	Fermt1	Enhancers_Liver_51017
ENSFDAG00000010728	N.A	Enhancers_Liver_51040
ENSFDAG00000011655	Bmp2	Enhancers_Liver_51040
ENSFDAG00000007417	Tmx4	Enhancers_Liver_51097,Enhancers_Liver_51123
ENSFDAG00000017230	Plcb1	Enhancers_Liver_51097,Enhancers_Liver_51123,Enhancers_Liver_51147
ENSFDAG00000014815	Plcb4	Enhancers_Liver_51147
ENSFDAG00000000099	Pcsk2	Enhancers_Liver_51312
ENSFDAG00000016071	Bfsp1	Enhancers_Liver_51312
ENSFDAG00000010205	Rrbp1	Enhancers_Liver_51344
ENSFDAG00000001986	Banf2	Enhancers_Liver_51344
ENSFDAG00000017249	Cfap61	Enhancers_Liver_51455,Enhancers_Liver_51457,Enhancers_Liver_51458,Enhancers_Liver_51479,Enhancers_Liver_51481
ENSFDAG00000012660	Ralgapa2	Enhancers_Liver_51455,Enhancers_Liver_51457,Enhancers_Liver_51458,Enhancers_Liver_51479,Enhancers_Liver_51481
ENSFDAG00000001025	Foxa2	Enhancers_Liver_51538,Enhancers_Liver_51574
ENSFDAG00000014836	Cd93	Enhancers_Liver_51574
ENSFDAG00000017673	Cst7	Enhancers_Liver_51618,Enhancers_Liver_51619,Enhancers_Liver_51620
ENSFDAG00000016031	Apmap	Enhancers_Liver_51618,Enhancers_Liver_51619,Enhancers_Liver_51620,Enhancers_Liver_51621
ENSFDAG00000014012	Acss1	Enhancers_Liver_51621,Enhancers_Liver_51627
ENSFDAG00000005856	Mylk2	Enhancers_Liver_51720
ENSFDAG00000006282	Tpx2	Enhancers_Liver_51720
ENSFDAG00000017231	Tm9sf4	Enhancers_Liver_51754
ENSFDAG00000013369	Plagl2	Enhancers_Liver_51754
ENSFDAG00000005632	Asxl1	Enhancers_Liver_51774,Enhancers_Liver_51778
ENSFDAG00000013913	Nol4l	Enhancers_Liver_51774,Enhancers_Liver_51778
ENSFDAG00000015460	Fam136a	Enhancers_Liver_51797
ENSFDAG00000010500	Sun5	Enhancers_Liver_51797
ENSFDAG00000011512	Ahcy	Enhancers_Liver_51878
ENSFDAG00000018216	N.A	Enhancers_Liver_51878
ENSFDAG00000018572	Map1lc3a	Enhancers_Liver_51894
ENSFDAG00000021046	Pigu	Enhancers_Liver_51894
ENSFDAG00000004651	Trp53inp2	Enhancers_Liver_51900
ENSFDAG00000013486	Ncoa6	Enhancers_Liver_51900
ENSFDAG00000008861	Aar2	Enhancers_Liver_51969
ENSFDAG00000019944	Dlgap4	Enhancers_Liver_51969
ENSFDAG00000015173	Ctnnbl1	Enhancers_Liver_52031
ENSFDAG00000004172	Vstm2l	Enhancers_Liver_52031
ENSFDAG00000019588	Emilin3	Enhancers_Liver_52210,Enhancers_Liver_52216,Enhancers_Liver_52222
ENSFDAG00000016022	R3hdml	Enhancers_Liver_52290
ENSFDAG00000011216	Hnf4a	Enhancers_Liver_52290,Enhancers_Liver_52292
ENSFDAG00000014700	Ttpal	Enhancers_Liver_52304
ENSFDAG00000008714	Serinc3	Enhancers_Liver_52304
ENSFDAG00000018798	Ada	Enhancers_Liver_52343
ENSFDAG00000004506	Ccn5	Enhancers_Liver_52343
ENSFDAG00000004211	Stk4	Enhancers_Liver_52352
ENSFDAG00000015426	Kcns1	Enhancers_Liver_52352
ENSFDAG00000017703	Ocstamp	Enhancers_Liver_52411,Enhancers_Liver_52413
ENSFDAG00000021223	Slc13a3	Enhancers_Liver_52411,Enhancers_Liver_52413,Enhancers_Liver_52414,Enhancers_Liver_52417
ENSFDAG00000015505	Trp53rka	Enhancers_Liver_52414,Enhancers_Liver_52417
ENSFDAG00000006063	Prex1	Enhancers_Liver_52511,Enhancers_Liver_52516,Enhancers_Liver_52517
ENSFDAG00000009851	Ripor3	Enhancers_Liver_52705,Enhancers_Liver_52706
ENSFDAG00000011747	Pard6b	Enhancers_Liver_52705,Enhancers_Liver_52706,Enhancers_Liver_52718,Enhancers_Liver_52721
ENSFDAG00000009625	Adnp	Enhancers_Liver_52718,Enhancers_Liver_52721
ENSFDAG00000010005	Zfp64	Enhancers_Liver_52745,Enhancers_Liver_52746
ENSFDAG00000017812	Sall4	Enhancers_Liver_52745,Enhancers_Liver_52746
ENSFDAG00000021230	Dok5	Enhancers_Liver_52837,Enhancers_Liver_52839,Enhancers_Liver_52840
ENSFDAG00000011163	Pfdn4	Enhancers_Liver_52837,Enhancers_Liver_52839,Enhancers_Liver_52840
ENSFDAG00000006783	Osbpl2	Enhancers_Liver_52995
ENSFDAG00000015889	Gm9774	Enhancers_Liver_52995
ENSFDAG00000013246	Tcfl5	Enhancers_Liver_53017
ENSFDAG00000010796	Dido1	Enhancers_Liver_53017
ENSFDAG00000016472	Slc17a9	Enhancers_Liver_53021
ENSFDAG00000000397	Ptk6	Enhancers_Liver_53043
ENSFDAG00000012876	Srms	Enhancers_Liver_53043
ENSFDAG00000008666	Hnf4g	Enhancers_Liver_53113
ENSFDAG00000016499	Hey1	Enhancers_Liver_53141,Enhancers_Liver_53147
ENSFDAG00000013634	Mrps28	Enhancers_Liver_53141,Enhancers_Liver_53147
ENSFDAG00000015623	Fabp5	Enhancers_Liver_53226
ENSFDAG00000002292	Pmp2	Enhancers_Liver_53226
ENSFDAG00000010414	Atp6v0d2	Enhancers_Liver_53316
ENSFDAG00000001673	Slc7a13	Enhancers_Liver_53316,Enhancers_Liver_58243
ENSFDAG00000008821	Cyp7b1	Enhancers_Liver_53344,Enhancers_Liver_53345,Enhancers_Liver_53346,Enhancers_Liver_53349,Enhancers_Liver_53350
ENSFDAG00000005126	Cp	Enhancers_Liver_53451
ENSFDAG00000010971	Hps3	Enhancers_Liver_53451
ENSFDAG00000008867	Kcnmb2	Enhancers_Liver_53466,Enhancers_Liver_53467,Enhancers_Liver_53468,Enhancers_Liver_53472,Enhancers_Liver_53475,Enhancers_Liver_53481,Enhancers_Liver_53485,Enhancers_Liver_53486,Enhancers_Liver_53487,Enhancers_Liver_53488,Enhancers_Liver_53489,Enhancers_Liver_53492
ENSFDAG00000012536	Tbl1xr1	Enhancers_Liver_53466,Enhancers_Liver_53467,Enhancers_Liver_53468,Enhancers_Liver_53472,Enhancers_Liver_53475,Enhancers_Liver_53481,Enhancers_Liver_53485,Enhancers_Liver_53486,Enhancers_Liver_53487,Enhancers_Liver_53488,Enhancers_Liver_53489,Enhancers_Liver_53492,Enhancers_Liver_53499,Enhancers_Liver_53515,Enhancers_Liver_53528
ENSFDAG00000011759	N.A	Enhancers_Liver_53540
ENSFDAG00000003504	Naaladl2	Enhancers_Liver_53573
ENSFDAG00000019741	Ghsr	Enhancers_Liver_53631,Enhancers_Liver_53632
ENSFDAG00000017805	Fndc3b	Enhancers_Liver_53631,Enhancers_Liver_53632
ENSFDAG00000015942	Tmem212	Enhancers_Liver_53688
ENSFDAG00000012119	Pld1	Enhancers_Liver_53688,Enhancers_Liver_53701,Enhancers_Liver_53702,Enhancers_Liver_53708
ENSFDAG00000015650	Tnik	Enhancers_Liver_53701,Enhancers_Liver_53702,Enhancers_Liver_53708,Enhancers_Liver_53718
ENSFDAG00000008731	Slc2a2	Enhancers_Liver_53718
ENSFDAG00000021373	Mecom	Enhancers_Liver_53754,Enhancers_Liver_53764,Enhancers_Liver_53766
ENSFDAG00000014143	Actrt3	Enhancers_Liver_53754,Enhancers_Liver_53764,Enhancers_Liver_53766
ENSFDAG00000011851	Sox2	Enhancers_Liver_53837,Enhancers_Liver_53845,Enhancers_Liver_53850
ENSFDAG00000010669	Atp11b	Enhancers_Liver_53837,Enhancers_Liver_53845,Enhancers_Liver_53850
ENSFDAG00000014766	Slc27a3	Enhancers_Liver_55408,Enhancers_Liver_55413
ENSFDAG00000007821	Spata5	Enhancers_Liver_53897,Enhancers_Liver_53899
ENSFDAG00000012452	Spry1	Enhancers_Liver_53897,Enhancers_Liver_53899
ENSFDAG00000000972	Tpt1	Enhancers_Liver_53932
ENSFDAG00000010505	Ankrd50	Enhancers_Liver_53932
ENSFDAG00000017802	N.A	Enhancers_Liver_53973,Enhancers_Liver_53974
ENSFDAG00000001467	Pgrmc2	Enhancers_Liver_54015,Enhancers_Liver_54019
ENSFDAG00000011383	Jade1	Enhancers_Liver_54015,Enhancers_Liver_54019
ENSFDAG00000020383	Foxo1	Enhancers_Liver_54233,Enhancers_Liver_54246,Enhancers_Liver_54247,Enhancers_Liver_54248
ENSFDAG00000016879	Cog6	Enhancers_Liver_54233,Enhancers_Liver_54246,Enhancers_Liver_54247,Enhancers_Liver_54248
ENSFDAG00000007168	Lhfp	Enhancers_Liver_54268
ENSFDAG00000006334	Nhlrc3	Enhancers_Liver_54268
ENSFDAG00000010429	N.A	Enhancers_Liver_54321
ENSFDAG00000016202	Tm4sf1	Enhancers_Liver_54327,Enhancers_Liver_54328
ENSFDAG00000018794	Polr2k	Enhancers_Liver_54327,Enhancers_Liver_54328
ENSFDAG00000020238	Tm4sf4	Enhancers_Liver_54349
ENSFDAG00000016074	Wwtr1	Enhancers_Liver_54349
ENSFDAG00000010318	Pfn2	Enhancers_Liver_54396
ENSFDAG00000021282	Tsc22d2	Enhancers_Liver_54396
ENSFDAG00000016341	Erich6	Enhancers_Liver_54402
ENSFDAG00000011588	Siah2	Enhancers_Liver_54402,Enhancers_Liver_54409
ENSFDAG00000002165	Clrn1	Enhancers_Liver_54409
ENSFDAG00000003809	P2ry1	Enhancers_Liver_54512
ENSFDAG00000000349	Rap2b	Enhancers_Liver_54512
ENSFDAG00000014061	Arhgef26	Enhancers_Liver_54518
ENSFDAG00000005896	Dhx36	Enhancers_Liver_54518
ENSFDAG00000008747	Tiparp	Enhancers_Liver_54589,Enhancers_Liver_54590
ENSFDAG00000020869	Nck1	Enhancers_Liver_54589,Enhancers_Liver_54590
ENSFDAG00000011051	Ppm1l	Enhancers_Liver_54710,Enhancers_Liver_54711,Enhancers_Liver_54718
ENSFDAG00000007645	B3galnt1	Enhancers_Liver_54710,Enhancers_Liver_54711,Enhancers_Liver_54718
ENSFDAG00000013243	N.A	Enhancers_Liver_54758
ENSFDAG00000004304	Serpini2	Enhancers_Liver_54758
ENSFDAG00000012651	N.A	Enhancers_Liver_54824
ENSFDAG00000011349	Fnip2	Enhancers_Liver_54824
ENSFDAG00000009006	Glrb	Enhancers_Liver_54876
ENSFDAG00000002431	Ndufa6	Enhancers_Liver_54876
ENSFDAG00000009003	Ctso	Enhancers_Liver_54900
ENSFDAG00000014454	Tdo2	Enhancers_Liver_54900
ENSFDAG00000008629	Trim2	Enhancers_Liver_55055
ENSFDAG00000007361	Fhdc1	Enhancers_Liver_55055
ENSFDAG00000010898	Tmem154	Enhancers_Liver_55073
ENSFDAG00000004684	Fbxw7	Enhancers_Liver_55073,Enhancers_Liver_55088
ENSFDAG00000006426	Gatb	Enhancers_Liver_55088,Enhancers_Liver_55099,Enhancers_Liver_55102
ENSFDAG00000001448	Fhip1a	Enhancers_Liver_55099,Enhancers_Liver_55102
ENSFDAG00000016826	Dclk2	Enhancers_Liver_55163
ENSFDAG00000008139	Iqcm	Enhancers_Liver_55163
ENSFDAG00000009005	Fcrl6	Enhancers_Liver_75098
ENSFDAG00000006306	Iqgap3	Enhancers_Liver_55230
ENSFDAG00000007244	Mef2d	Enhancers_Liver_55230
ENSFDAG00000016081	Adar	Enhancers_Liver_55352
ENSFDAG00000012806	Chrnb2	Enhancers_Liver_55352
ENSFDAG00000018020	Cfap141	Enhancers_Liver_55380
ENSFDAG00000004528	Tpm3	Enhancers_Liver_55380
ENSFDAG00000005767	Ints3	Enhancers_Liver_55408,Enhancers_Liver_55413
ENSFDAG00000016327	S100a5	Enhancers_Liver_55428,Enhancers_Liver_55429,Enhancers_Liver_55432,Enhancers_Liver_55433
ENSFDAG00000003448	S100a4	Enhancers_Liver_55428,Enhancers_Liver_55429,Enhancers_Liver_55432,Enhancers_Liver_55433
ENSFDAG00000019549	Gm42674	Enhancers_Liver_55428
ENSFDAG00000008275	Them4	Enhancers_Liver_55449
ENSFDAG00000015368	N.A	Enhancers_Liver_55449
ENSFDAG00000010231	Ecm1	Enhancers_Liver_55558
ENSFDAG00000011326	Otud7b	Enhancers_Liver_55585
ENSFDAG00000021214	Mtmr11	Enhancers_Liver_55585
ENSFDAG00000019513	Ankrd35	Enhancers_Liver_55610
ENSFDAG00000007731	Gm42957	Enhancers_Liver_55610
ENSFDAG00000005696	Gpr89	Enhancers_Liver_55647
ENSFDAG00000012342	Gja5	Enhancers_Liver_55647
ENSFDAG00000006876	Pde4dip	Enhancers_Liver_55665,Enhancers_Liver_55672,Enhancers_Liver_55673,Enhancers_Liver_55675
ENSFDAG00000018553	Sec22b	Enhancers_Liver_55682,Enhancers_Liver_55691,Enhancers_Liver_55692,Enhancers_Liver_55704,Enhancers_Liver_55719
ENSFDAG00000014859	Notch2	Enhancers_Liver_55691,Enhancers_Liver_55692,Enhancers_Liver_55704,Enhancers_Liver_55719
ENSFDAG00000000771	Reg4	Enhancers_Liver_55732
ENSFDAG00000014818	Hmgcs2	Enhancers_Liver_55750
ENSFDAG00000016811	Phgdh	Enhancers_Liver_55750,Enhancers_Liver_55756
ENSFDAG00000015529	Zfp697	Enhancers_Liver_55756,Enhancers_Liver_55784
ENSFDAG00000017435	Hsd3b4	Enhancers_Liver_55784
ENSFDAG00000006563	Gdap2	Enhancers_Liver_55829,Enhancers_Liver_55836,Enhancers_Liver_55839
ENSFDAG00000001153	Tent5c	Enhancers_Liver_55829,Enhancers_Liver_55836,Enhancers_Liver_55839
ENSFDAG00000013480	Man1a2	Enhancers_Liver_55852
ENSFDAG00000010345	Vtcn1	Enhancers_Liver_55852
ENSFDAG00000010600	Atp1a1	Enhancers_Liver_55903
ENSFDAG00000021329	Mab21l3	Enhancers_Liver_55903
ENSFDAG00000014301	Casq2	Enhancers_Liver_55913
ENSFDAG00000005758	Vangl1	Enhancers_Liver_55913
ENSFDAG00000010574	Rap1a	Enhancers_Liver_56071,Enhancers_Liver_56100,Enhancers_Liver_56102,Enhancers_Liver_56105,Enhancers_Liver_56110
ENSFDAG00000019211	Inka2	Enhancers_Liver_56071
ENSFDAG00000013299	Adora3	Enhancers_Liver_56100,Enhancers_Liver_56102,Enhancers_Liver_56105,Enhancers_Liver_56110
ENSFDAG00000019787	Ahcyl1	Enhancers_Liver_56176
ENSFDAG00000009464	Csf1	Enhancers_Liver_56176
ENSFDAG00000018561	Elapor1	Enhancers_Liver_56262
ENSFDAG00000021349	Sars	Enhancers_Liver_56262
ENSFDAG00000019948	Rnpc3	Enhancers_Liver_56336
ENSFDAG00000001433	N.A	Enhancers_Liver_56336
ENSFDAG00000009613	Pacc1	Enhancers_Liver_56358
ENSFDAG00000007734	S1pr1	Enhancers_Liver_56358
ENSFDAG00000016914	Vcam1	Enhancers_Liver_56400,Enhancers_Liver_56413,Enhancers_Liver_56414,Enhancers_Liver_56434,Enhancers_Liver_56441
ENSFDAG00000014781	Cdc14a	Enhancers_Liver_56400,Enhancers_Liver_56413,Enhancers_Liver_56414,Enhancers_Liver_56434,Enhancers_Liver_56441
ENSFDAG00000008008	Frrs1	Enhancers_Liver_56475
ENSFDAG00000016625	Palmd	Enhancers_Liver_56475
ENSFDAG00000013780	Snx7	Enhancers_Liver_56510
ENSFDAG00000009322	Dpyd	Enhancers_Liver_56510,Enhancers_Liver_56535
ENSFDAG00000000325	Ptbp2	Enhancers_Liver_56535
ENSFDAG00000002150	N.A	Enhancers_Liver_56586,Enhancers_Liver_56610
ENSFDAG00000001234	Alg14	Enhancers_Liver_56586
ENSFDAG00000016900	Slc44a3	Enhancers_Liver_56610
ENSFDAG00000007605	Abcd3	Enhancers_Liver_56653,Enhancers_Liver_56659
ENSFDAG00000013932	Arhgap29	Enhancers_Liver_56653,Enhancers_Liver_56659,Enhancers_Liver_56664,Enhancers_Liver_56670,Enhancers_Liver_56671,Enhancers_Liver_56681,Enhancers_Liver_56682
ENSFDAG00000017478	Abca4	Enhancers_Liver_56664,Enhancers_Liver_56670,Enhancers_Liver_56671,Enhancers_Liver_56681,Enhancers_Liver_56682
ENSFDAG00000018990	Gclm	Enhancers_Liver_56690
ENSFDAG00000018549	Bcar3	Enhancers_Liver_56701
ENSFDAG00000004465	Dnttip2	Enhancers_Liver_56701
ENSFDAG00000011743	Sec24d	Enhancers_Liver_56798,Enhancers_Liver_56800,Enhancers_Liver_56801,Enhancers_Liver_56803
ENSFDAG00000005916	Mettl14	Enhancers_Liver_56800,Enhancers_Liver_56801,Enhancers_Liver_56803
ENSFDAG00000009927	Zgrf1	Enhancers_Liver_56850
ENSFDAG00000014152	Alpk1	Enhancers_Liver_56850
ENSFDAG00000010717	Arhgef38	Enhancers_Liver_57029
ENSFDAG00000015698	Arhgef38	Enhancers_Liver_57029
ENSFDAG00000017864	Ppa2	Enhancers_Liver_57031
ENSFDAG00000016147	Slc9b1	Enhancers_Liver_57074
ENSFDAG00000014190	Cisd2	Enhancers_Liver_57074
ENSFDAG00000010256	Nfkb1	Enhancers_Liver_57106
ENSFDAG00000010020	Slc39a8	Enhancers_Liver_57106
ENSFDAG00000001180	Bank1	Enhancers_Liver_57128
ENSFDAG00000019290	Ppp3ca	Enhancers_Liver_57128,Enhancers_Liver_57153,Enhancers_Liver_57154,Enhancers_Liver_57163
ENSFDAG00000001212	N.A	Enhancers_Liver_57213,Enhancers_Liver_57214
ENSFDAG00000001783	Adh6a	Enhancers_Liver_57213,Enhancers_Liver_57214
ENSFDAG00000014472	Unc5c	Enhancers_Liver_57259
ENSFDAG00000013183	Bmpr1b	Enhancers_Liver_57259
ENSFDAG00000003729	Hpgds	Enhancers_Liver_70800
ENSFDAG00000021190	Pkd2	Enhancers_Liver_57293
ENSFDAG00000014570	Pkn2	Enhancers_Liver_57311,Enhancers_Liver_57312,Enhancers_Liver_57314,Enhancers_Liver_57324,Enhancers_Liver_57325,Enhancers_Liver_57326,Enhancers_Liver_57328,Enhancers_Liver_57330,Enhancers_Liver_57336,Enhancers_Liver_57339
ENSFDAG00000010097	Lmo4	Enhancers_Liver_57314,Enhancers_Liver_57324,Enhancers_Liver_57325,Enhancers_Liver_57326,Enhancers_Liver_57328,Enhancers_Liver_57330,Enhancers_Liver_57336,Enhancers_Liver_57339
ENSFDAG00000003652	Znhit6	Enhancers_Liver_57393,Enhancers_Liver_57397
ENSFDAG00000017625	Ccn1	Enhancers_Liver_57393,Enhancers_Liver_57397
ENSFDAG00000021033	N.A	Enhancers_Liver_57403,Enhancers_Liver_57405
ENSFDAG00000012243	Ddah1	Enhancers_Liver_57403,Enhancers_Liver_57405,Enhancers_Liver_57423,Enhancers_Liver_57436
ENSFDAG00000010270	Bcl10	Enhancers_Liver_57436
ENSFDAG00000008850	4930503B20Rik	Enhancers_Liver_57480
ENSFDAG00000013667	Samd13	Enhancers_Liver_57480
ENSFDAG00000008998	Adgrl2	Enhancers_Liver_57530,Enhancers_Liver_57542
ENSFDAG00000015166	Adgrl4	Enhancers_Liver_57619,Enhancers_Liver_57629
ENSFDAG00000009144	Gipc2	Enhancers_Liver_57649
ENSFDAG00000010626	Dnajb4	Enhancers_Liver_57649
ENSFDAG00000013260	Nexn	Enhancers_Liver_57661
ENSFDAG00000006611	Miga1	Enhancers_Liver_57661
ENSFDAG00000008419	Zzz3	Enhancers_Liver_57676,Enhancers_Liver_57678,Enhancers_Liver_57679
ENSFDAG00000013901	Ak5	Enhancers_Liver_57676,Enhancers_Liver_57678,Enhancers_Liver_57679
ENSFDAG00000011089	St6galnac5	Enhancers_Liver_57702
ENSFDAG00000001060	St6galnac3	Enhancers_Liver_57702,Enhancers_Liver_57727
ENSFDAG00000010568	Asb17	Enhancers_Liver_57727
ENSFDAG00000017305	Tox	Enhancers_Liver_57943,Enhancers_Liver_57944
ENSFDAG00000017330	Nsmaf	Enhancers_Liver_57943,Enhancers_Liver_57944
ENSFDAG00000000528	Chd7	Enhancers_Liver_58008
ENSFDAG00000019063	Clvs1	Enhancers_Liver_58008
ENSFDAG00000007370	Runx1t1	Enhancers_Liver_58167
ENSFDAG00000019510	Slc26a7	Enhancers_Liver_58167
ENSFDAG00000020335	Necab1	Enhancers_Liver_58195
ENSFDAG00000019599	Osgin2	Enhancers_Liver_58221,Enhancers_Liver_58222
ENSFDAG00000005504	Ripk2	Enhancers_Liver_58221,Enhancers_Liver_58222
ENSFDAG00000008122	Mmp16	Enhancers_Liver_58227
ENSFDAG00000003915	Wwp1	Enhancers_Liver_58243
ENSFDAG00000009202	Fbxl4	Enhancers_Liver_58292,Enhancers_Liver_58293
ENSFDAG00000017123	Mms22l	Enhancers_Liver_58292,Enhancers_Liver_58293
ENSFDAG00000002571	Map3k7	Enhancers_Liver_58351
ENSFDAG00000001423	Bach2	Enhancers_Liver_58351
ENSFDAG00000014094	Spaca1	Enhancers_Liver_58395
ENSFDAG00000021134	Akirin2	Enhancers_Liver_58395,Enhancers_Liver_58402
ENSFDAG00000011578	Orc3	Enhancers_Liver_58402
ENSFDAG00000012877	Ifnk	Enhancers_Liver_58439
ENSFDAG00000008650	C9orf72	Enhancers_Liver_58439,Enhancers_Liver_58449
ENSFDAG00000012320	Nfx1	Enhancers_Liver_58534
ENSFDAG00000017025	Aqp7	Enhancers_Liver_58534
ENSFDAG00000007466	Nudt2	Enhancers_Liver_58568
ENSFDAG00000013268	1110017D15Rik	Enhancers_Liver_58568
ENSFDAG00000011313	Dctn3	Enhancers_Liver_58587
ENSFDAG00000014273	Unc13b	Enhancers_Liver_58608
ENSFDAG00000020805	N.A	Enhancers_Liver_58608
ENSFDAG00000004164	Creb3	Enhancers_Liver_58638
ENSFDAG00000012976	Gba2	Enhancers_Liver_58638
ENSFDAG00000013075	Rgp1	Enhancers_Liver_58638
ENSFDAG00000013434	Npr2	Enhancers_Liver_58644
ENSFDAG00000005992	Spag8	Enhancers_Liver_58644
ENSFDAG00000018069	Tmem8b	Enhancers_Liver_58654
ENSFDAG00000020212	N.A	Enhancers_Liver_58654
ENSFDAG00000014200	Zcchc7	Enhancers_Liver_58697
ENSFDAG00000010424	Grhpr	Enhancers_Liver_58697
ENSFDAG00000016360	Tomm5	Enhancers_Liver_58706
ENSFDAG00000000824	Frmpd1	Enhancers_Liver_58706
ENSFDAG00000010785	Xpa	Enhancers_Liver_58776
ENSFDAG00000014164	Trmo	Enhancers_Liver_58776
ENSFDAG00000011828	Coro2a	Enhancers_Liver_58798
ENSFDAG00000000077	Tbc1d2	Enhancers_Liver_58798
ENSFDAG00000004571	Galnt12	Enhancers_Liver_58826
ENSFDAG00000010259	Col15a1	Enhancers_Liver_58853,Enhancers_Liver_58855
ENSFDAG00000000069	Tgfbr1	Enhancers_Liver_58853,Enhancers_Liver_58855
ENSFDAG00000015497	Erp44	Enhancers_Liver_58892
ENSFDAG00000003921	Invs	Enhancers_Liver_58892,Enhancers_Liver_58893,Enhancers_Liver_58898
ENSFDAG00000007721	Tex10	Enhancers_Liver_58892,Enhancers_Liver_58893,Enhancers_Liver_58898
ENSFDAG00000002086	Plppr1	Enhancers_Liver_58923
ENSFDAG00000019576	Baat	Enhancers_Liver_58923
ENSFDAG00000016214	Abca1	Enhancers_Liver_58979
ENSFDAG00000014845	Nipsnap3a	Enhancers_Liver_58979
ENSFDAG00000005085	N.A	Enhancers_Liver_59024,Enhancers_Liver_59031,Enhancers_Liver_59032
ENSFDAG00000009170	Slc44a1	Enhancers_Liver_59024,Enhancers_Liver_59031,Enhancers_Liver_59032
ENSFDAG00000011604	Pakap	Enhancers_Liver_59213,Enhancers_Liver_59245,Enhancers_Liver_59247,Enhancers_Liver_59259,Enhancers_Liver_59260
ENSFDAG00000003824	Pakap	Enhancers_Liver_59213,Enhancers_Liver_59245,Enhancers_Liver_59247,Enhancers_Liver_59259,Enhancers_Liver_59260
ENSFDAG00000004567	N.A	Enhancers_Liver_59291
ENSFDAG00000015135	Shoc1	Enhancers_Liver_59291
ENSFDAG00000017431	Ugcg	Enhancers_Liver_59336
ENSFDAG00000011288	Susd1	Enhancers_Liver_59336
ENSFDAG00000006382	Tmem268	Enhancers_Liver_59579
ENSFDAG00000015440	Tnfsf15	Enhancers_Liver_59579
ENSFDAG00000013428	Rasef	Enhancers_Liver_59724
ENSFDAG00000018715	Lurap1l	Enhancers_Liver_59820
ENSFDAG00000011171	Mpdz	Enhancers_Liver_59820,Enhancers_Liver_59840,Enhancers_Liver_59841,Enhancers_Liver_59860,Enhancers_Liver_59861,Enhancers_Liver_59869,Enhancers_Liver_59886,Enhancers_Liver_59901
ENSFDAG00000012167	Nfib	Enhancers_Liver_59840,Enhancers_Liver_59841,Enhancers_Liver_59860,Enhancers_Liver_59861,Enhancers_Liver_59869,Enhancers_Liver_59886,Enhancers_Liver_59901
ENSFDAG00000010643	Frem1	Enhancers_Liver_59979
ENSFDAG00000016062	Ttc39b	Enhancers_Liver_59979
ENSFDAG00000007041	Psip1	Enhancers_Liver_59985
ENSFDAG00000016205	Snapc3	Enhancers_Liver_59985
ENSFDAG00000005891	Acer2	Enhancers_Liver_60031,Enhancers_Liver_60037,Enhancers_Liver_60039,Enhancers_Liver_60044
ENSFDAG00000015150	Slc24a2	Enhancers_Liver_60037,Enhancers_Liver_60039,Enhancers_Liver_60044,Enhancers_Liver_60061
ENSFDAG00000019133	Mllt3	Enhancers_Liver_60061
ENSFDAG00000013373	Cdkn2b	Enhancers_Liver_60096,Enhancers_Liver_60098
ENSFDAG00000005854	Dmrta1	Enhancers_Liver_60096,Enhancers_Liver_60098
ENSFDAG00000012493	N.A	Enhancers_Liver_60122
ENSFDAG00000017497	Jun	Enhancers_Liver_60196,Enhancers_Liver_60202,Enhancers_Liver_60203,Enhancers_Liver_60205,Enhancers_Liver_60214,Enhancers_Liver_60215,Enhancers_Liver_60220,Enhancers_Liver_60238,Enhancers_Liver_60246,Enhancers_Liver_60247,Enhancers_Liver_60248,Enhancers_Liver_60249
ENSFDAG00000017146	Fggy	Enhancers_Liver_60196,Enhancers_Liver_60202,Enhancers_Liver_60203,Enhancers_Liver_60205,Enhancers_Liver_60214,Enhancers_Liver_60215,Enhancers_Liver_60220,Enhancers_Liver_60238,Enhancers_Liver_60246,Enhancers_Liver_60247,Enhancers_Liver_60248,Enhancers_Liver_60249,Enhancers_Liver_60259,Enhancers_Liver_60274,Enhancers_Liver_60275
ENSFDAG00000014384	Hook1	Enhancers_Liver_60259,Enhancers_Liver_60274,Enhancers_Liver_60275
ENSFDAG00000013392	Gm12695	Enhancers_Liver_60316,Enhancers_Liver_60321,Enhancers_Liver_60322
ENSFDAG00000011281	Nfia	Enhancers_Liver_60316,Enhancers_Liver_60321,Enhancers_Liver_60322,Enhancers_Liver_60345,Enhancers_Liver_60368,Enhancers_Liver_60379,Enhancers_Liver_60381,Enhancers_Liver_60395,Enhancers_Liver_60396
ENSFDAG00000019886	Tm2d1	Enhancers_Liver_60345,Enhancers_Liver_60368,Enhancers_Liver_60379,Enhancers_Liver_60381,Enhancers_Liver_60395,Enhancers_Liver_60396
ENSFDAG00000015365	Dock7	Enhancers_Liver_60427
ENSFDAG00000014176	Pgm1	Enhancers_Liver_60449
ENSFDAG00000005892	Ror1	Enhancers_Liver_60488
ENSFDAG00000005398	Cachd1	Enhancers_Liver_60488
ENSFDAG00000011372	C8a	Enhancers_Liver_60704,Enhancers_Liver_60705
ENSFDAG00000005077	Fyb2	Enhancers_Liver_60704,Enhancers_Liver_60705,Enhancers_Liver_60723
ENSFDAG00000009881	Prkaa2	Enhancers_Liver_60723,Enhancers_Liver_60733
ENSFDAG00000011399	Aida	Enhancers_Liver_60795,Enhancers_Liver_60803,Enhancers_Liver_60804,Enhancers_Liver_60806,Enhancers_Liver_60814,Enhancers_Liver_60817,Enhancers_Liver_60819,Enhancers_Liver_60822,Enhancers_Liver_60823,Enhancers_Liver_60825
ENSFDAG00000008899	Usp24	Enhancers_Liver_60803,Enhancers_Liver_60804,Enhancers_Liver_60806,Enhancers_Liver_60814,Enhancers_Liver_60817,Enhancers_Liver_60819,Enhancers_Liver_60822,Enhancers_Liver_60823,Enhancers_Liver_60825
ENSFDAG00000013101	Ssbp3	Enhancers_Liver_60930,Enhancers_Liver_60932,Enhancers_Liver_60940,Enhancers_Liver_60941
ENSFDAG00000011469	Mrpl37	Enhancers_Liver_60930,Enhancers_Liver_60932,Enhancers_Liver_60940,Enhancers_Liver_60941
ENSFDAG00000016703	Coa7	Enhancers_Liver_61019
ENSFDAG00000015324	Zyg11b	Enhancers_Liver_61019
ENSFDAG00000010115	Eps15	Enhancers_Liver_61086
ENSFDAG00000014600	Ttc39a	Enhancers_Liver_61086
ENSFDAG00000002504	Trabd2b	Enhancers_Liver_61171
ENSFDAG00000012873	Fbxo28	Enhancers_Liver_61171
ENSFDAG00000012835	Cyp4b1	Enhancers_Liver_61194
ENSFDAG00000015656	Cyp4a12a	Enhancers_Liver_61194
ENSFDAG00000012960	Dmbx1	Enhancers_Liver_61257
ENSFDAG00000000105	Faah	Enhancers_Liver_61257,Enhancers_Liver_61261,Enhancers_Liver_61262
ENSFDAG00000013350	N.A	Enhancers_Liver_61261,Enhancers_Liver_61262
ENSFDAG00000008116	Nasp	Enhancers_Liver_61279
ENSFDAG00000008462	Akr1a1	Enhancers_Liver_61279
ENSFDAG00000006852	Ptch2	Enhancers_Liver_61307
ENSFDAG00000008543	Tex2	Enhancers_Liver_61307
ENSFDAG00000010745	Kif2c	Enhancers_Liver_61322
ENSFDAG00000006520	Rps8	Enhancers_Liver_61322
ENSFDAG00000017552	Tmem53	Enhancers_Liver_61329,Enhancers_Liver_61330
ENSFDAG00000009182	Rnf220	Enhancers_Liver_61329,Enhancers_Liver_61330
ENSFDAG00000007099	Slc6a9	Enhancers_Liver_61371,Enhancers_Liver_61372
[truncated: 836 more rows]

## Sheet: Enhancers Liver DOWN genes all
Ensembl gene id (Fdam)	Gene name	Enhancers Liver DOWN
ENSFDAG00000013840	Pdk3	Enhancers_Liver_1
ENSFDAG00000006293	Pcyt1b	Enhancers_Liver_1
ENSFDAG00000007654	Rp1	Enhancers_Liver_10
ENSFDAG00000004666	Rplp2	Enhancers_Liver_10
ENSFDAG00000006330	Rgs20	Enhancers_Liver_24
ENSFDAG00000011997	Atp6v1h	Enhancers_Liver_24
ENSFDAG00000008113	St18	Enhancers_Liver_44
ENSFDAG00000008405	Pcmtd1	Enhancers_Liver_44
ENSFDAG00000020167	Tcf24	Enhancers_Liver_70
ENSFDAG00000012828	Ppp1r42	Enhancers_Liver_70
ENSFDAG00000020000	Msr1	Enhancers_Liver_80381,Enhancers_Liver_80384
ENSFDAG00000019085	Ncoa2	Enhancers_Liver_118
ENSFDAG00000009317	Hmgb1	Enhancers_Liver_118
ENSFDAG00000011353	Xkr9	Enhancers_Liver_172
ENSFDAG00000006268	Eya1	Enhancers_Liver_172
ENSFDAG00000013636	Tram2	Enhancers_Liver_271,Enhancers_Liver_273,Enhancers_Liver_278
ENSFDAG00000010305	Efhc1	Enhancers_Liver_271,Enhancers_Liver_273
ENSFDAG00000015205	Tmem14a	Enhancers_Liver_278
ENSFDAG00000013095	Rims1	Enhancers_Liver_315
ENSFDAG00000015587	Ogfrl1	Enhancers_Liver_315
ENSFDAG00000011697	Fam135a	Enhancers_Liver_350
ENSFDAG00000000475	N.A	Enhancers_Liver_350
ENSFDAG00000013797	Npas2	Enhancers_Liver_639
ENSFDAG00000010208	N.A	Enhancers_Liver_639
ENSFDAG00000005275	Rfx8	Enhancers_Liver_675
ENSFDAG00000007135	N.A	Enhancers_Liver_675
ENSFDAG00000015180	Il1r2	Enhancers_Liver_742
ENSFDAG00000003335	Il1r1	Enhancers_Liver_742
ENSFDAG00000016297	Slc9a4	Enhancers_Liver_756
ENSFDAG00000019101	Il18rap	Enhancers_Liver_756
ENSFDAG00000002147	Fhl2	Enhancers_Liver_818
ENSFDAG00000005140	Nck2	Enhancers_Liver_818
ENSFDAG00000020393	Tpp2	Enhancers_Liver_844
ENSFDAG00000013843	Mettl21c	Enhancers_Liver_844
ENSFDAG00000014229	Wdr75	Enhancers_Liver_869,Enhancers_Liver_871,Enhancers_Liver_873,Enhancers_Liver_881
ENSFDAG00000015224	Slc40a1	Enhancers_Liver_869,Enhancers_Liver_871,Enhancers_Liver_873,Enhancers_Liver_881
ENSFDAG00000007584	Nabp1	Enhancers_Liver_967,Enhancers_Liver_993
ENSFDAG00000008289	Myo1b	Enhancers_Liver_967,Enhancers_Liver_993
ENSFDAG00000009958	Nab1	Enhancers_Liver_1037
ENSFDAG00000012252	Nemp2	Enhancers_Liver_1037
ENSFDAG00000007051	Inpp1	Enhancers_Liver_1057
ENSFDAG00000011096	Stk17b	Enhancers_Liver_1088
ENSFDAG00000012744	Hecw2	Enhancers_Liver_1088
ENSFDAG00000017363	Gtf3c3	Enhancers_Liver_1117
ENSFDAG00000009025	Pgap1	Enhancers_Liver_1117,Enhancers_Liver_1135,Enhancers_Liver_1137
ENSFDAG00000011677	Ankrd44	Enhancers_Liver_1135,Enhancers_Liver_1137
ENSFDAG00000009242	Htra1	Enhancers_Liver_78550,Enhancers_Liver_78552
ENSFDAG00000000432	Plekha1	Enhancers_Liver_78550
ENSFDAG00000007588	Icos	Enhancers_Liver_1466
ENSFDAG00000007633	Nrp2	Enhancers_Liver_1536,Enhancers_Liver_1537,Enhancers_Liver_1552
ENSFDAG00000012715	Ino80d	Enhancers_Liver_1536,Enhancers_Liver_1537,Enhancers_Liver_1552
ENSFDAG00000007436	Klf7	Enhancers_Liver_1581,Enhancers_Liver_1582,Enhancers_Liver_1586,Enhancers_Liver_1624
ENSFDAG00000003815	Fastkd2	Enhancers_Liver_1581,Enhancers_Liver_1582,Enhancers_Liver_1586
ENSFDAG00000009173	Ldha	Enhancers_Liver_1624
ENSFDAG00000008784	Ccnyl1	Enhancers_Liver_1654,Enhancers_Liver_1672
ENSFDAG00000012647	Plekhm3	Enhancers_Liver_1654,Enhancers_Liver_1672
ENSFDAG00000021487	Cps1	Enhancers_Liver_1726,Enhancers_Liver_1731,Enhancers_Liver_1737
ENSFDAG00000010390	Igfbp2	Enhancers_Liver_1851,Enhancers_Liver_1854,Enhancers_Liver_1855
ENSFDAG00000004499	Igfbp5	Enhancers_Liver_1851,Enhancers_Liver_1854,Enhancers_Liver_1855
ENSFDAG00000005119	N.A	Enhancers_Liver_1867,Enhancers_Liver_1873,Enhancers_Liver_1883,Enhancers_Liver_1884
ENSFDAG00000002175	Tns1	Enhancers_Liver_1867,Enhancers_Liver_1873,Enhancers_Liver_1883,Enhancers_Liver_1884,Enhancers_Liver_1923,Enhancers_Liver_1929,Enhancers_Liver_1960
ENSFDAG00000004104	Rufy4	Enhancers_Liver_1960
ENSFDAG00000008292	Catip	Enhancers_Liver_1988
ENSFDAG00000012326	Pnkd	Enhancers_Liver_1988
ENSFDAG00000004725	Prkag3	Enhancers_Liver_2023
ENSFDAG00000005359	Nhej1	Enhancers_Liver_2029,Enhancers_Liver_2030
ENSFDAG00000007354	Ihh	Enhancers_Liver_2029,Enhancers_Liver_2030
ENSFDAG00000019289	Retreg2	Enhancers_Liver_2052
ENSFDAG00000016055	Zfand2b	Enhancers_Liver_2052
ENSFDAG00000009946	Cnppd1	Enhancers_Liver_2052
ENSFDAG00000020034	Ap1s3	Enhancers_Liver_2141
ENSFDAG00000009356	Wdfy1	Enhancers_Liver_2141
ENSFDAG00000010192	Cul3	Enhancers_Liver_2178
ENSFDAG00000011769	Dock10	Enhancers_Liver_2178
ENSFDAG00000012819	Spata3	Enhancers_Liver_2403
ENSFDAG00000010579	Psmd1	Enhancers_Liver_2403
ENSFDAG00000021057	Agap1	Enhancers_Liver_2688
ENSFDAG00000009260	Asb18	Enhancers_Liver_2688
ENSFDAG00000013194	Ackr3	Enhancers_Liver_2707
ENSFDAG00000010696	Cops8	Enhancers_Liver_2707
ENSFDAG00000014121	N.A	Enhancers_Liver_15893
ENSFDAG00000011521	Zcchc2	Enhancers_Liver_3015
ENSFDAG00000011556	Phlpp1	Enhancers_Liver_3015,Enhancers_Liver_3019,Enhancers_Liver_3022,Enhancers_Liver_3025,Enhancers_Liver_3049
ENSFDAG00000005265	Kdsr	Enhancers_Liver_3019,Enhancers_Liver_3022,Enhancers_Liver_3025,Enhancers_Liver_3049
ENSFDAG00000000042	Clasp1	Enhancers_Liver_3112
ENSFDAG00000019395	Tfcp2l1	Enhancers_Liver_3112
ENSFDAG00000018601	N.A	Enhancers_Liver_70924
ENSFDAG00000011220	Epb41l5	Enhancers_Liver_3176
ENSFDAG00000013949	Ptpn4	Enhancers_Liver_3176
ENSFDAG00000018420	Map3k19	Enhancers_Liver_3315
ENSFDAG00000020739	Ccnt2	Enhancers_Liver_3315
ENSFDAG00000011230	Il10	Enhancers_Liver_3397,Enhancers_Liver_3417
ENSFDAG00000011584	Mapkapk2	Enhancers_Liver_3397,Enhancers_Liver_3417
ENSFDAG00000011321	Rassf5	Enhancers_Liver_3431
ENSFDAG00000011373	Eif2d	Enhancers_Liver_3431
ENSFDAG00000013025	Srgap2	Enhancers_Liver_3447,Enhancers_Liver_3472,Enhancers_Liver_3473,Enhancers_Liver_3474
ENSFDAG00000005088	Fam72a	Enhancers_Liver_3447,Enhancers_Liver_3472,Enhancers_Liver_3473,Enhancers_Liver_3474
ENSFDAG00000000222	Slc45a3	Enhancers_Liver_3503
ENSFDAG00000009288	Nucks1	Enhancers_Liver_3503
ENSFDAG00000004146	Plekha6	Enhancers_Liver_3602
ENSFDAG00000014047	Golt1a	Enhancers_Liver_3602
ENSFDAG00000011386	Fmod	Enhancers_Liver_3702
ENSFDAG00000021165	Btg2	Enhancers_Liver_3702
ENSFDAG00000005106	Zfp281	Enhancers_Liver_3860
ENSFDAG00000021244	Nr5a2	Enhancers_Liver_3860
ENSFDAG00000007636	Rgs1	Enhancers_Liver_4036,Enhancers_Liver_4039,Enhancers_Liver_4040
ENSFDAG00000016204	Rgs21	Enhancers_Liver_4036,Enhancers_Liver_4039,Enhancers_Liver_4040
ENSFDAG00000020933	Tpr	Enhancers_Liver_4067
ENSFDAG00000016795	Prg4	Enhancers_Liver_4067,Enhancers_Liver_4074
ENSFDAG00000012588	Hmcn1	Enhancers_Liver_4086,Enhancers_Liver_4087
ENSFDAG00000012735	Ivns1abp	Enhancers_Liver_4111
ENSFDAG00000004285	1700025G04Rik	Enhancers_Liver_4137,Enhancers_Liver_4139,Enhancers_Liver_4143,Enhancers_Liver_4144
ENSFDAG00000013864	Edem3	Enhancers_Liver_4137,Enhancers_Liver_4139,Enhancers_Liver_4143,Enhancers_Liver_4144
ENSFDAG00000008645	Colgalt2	Enhancers_Liver_4202,Enhancers_Liver_4204
ENSFDAG00000018185	Apobec4	Enhancers_Liver_4202,Enhancers_Liver_4204
ENSFDAG00000012121	Smg7	Enhancers_Liver_4226
ENSFDAG00000014156	Ncf2	Enhancers_Liver_4226
ENSFDAG00000016017	Glul	Enhancers_Liver_4319,Enhancers_Liver_4325
ENSFDAG00000011421	Cacna1e	Enhancers_Liver_4319,Enhancers_Liver_4325,Enhancers_Liver_4359,Enhancers_Liver_4361
ENSFDAG00000005603	Mr1	Enhancers_Liver_4359,Enhancers_Liver_4361
ENSFDAG00000008521	Soat1	Enhancers_Liver_4434
ENSFDAG00000008214	Abl2	Enhancers_Liver_4434
ENSFDAG00000015713	Tor3a	Enhancers_Liver_4443
ENSFDAG00000017245	Fam20b	Enhancers_Liver_4443
ENSFDAG00000009150	Ralgps2	Enhancers_Liver_4470
ENSFDAG00000006864	Tex35	Enhancers_Liver_4470,Enhancers_Liver_4498
ENSFDAG00000016960	Rasal2	Enhancers_Liver_4498
ENSFDAG00000009207	N.A	Enhancers_Liver_6526
ENSFDAG00000006162	Tnr	Enhancers_Liver_4576,Enhancers_Liver_4577
ENSFDAG00000009642	4930523C07Rik	Enhancers_Liver_4576,Enhancers_Liver_4577,Enhancers_Liver_4584
ENSFDAG00000021149	Tnn	Enhancers_Liver_4584
ENSFDAG00000013303	Rc3h1	Enhancers_Liver_4615
ENSFDAG00000017392	Serpinc1	Enhancers_Liver_4615
ENSFDAG00000006850	N.A	Enhancers_Liver_4652
ENSFDAG00000015488	Selp	Enhancers_Liver_4742
ENSFDAG00000016414	Sell	Enhancers_Liver_4742
ENSFDAG00000019049	F5	Enhancers_Liver_4790
ENSFDAG00000021040	Slc19a2	Enhancers_Liver_4790
ENSFDAG00000012462	Tbx19	Enhancers_Liver_4857,Enhancers_Liver_4858
ENSFDAG00000003976	Sft2d2	Enhancers_Liver_4857,Enhancers_Liver_4858
ENSFDAG00000003009	Ank	Enhancers_Liver_29574
ENSFDAG00000008528	Fbxl7	Enhancers_Liver_29574
ENSFDAG00000013683	Adcy10	Enhancers_Liver_4878,Enhancers_Liver_4880
ENSFDAG00000011569	Mpzl1	Enhancers_Liver_4878,Enhancers_Liver_4880
ENSFDAG00000019126	Rcsd1	Enhancers_Liver_4901,Enhancers_Liver_4906
ENSFDAG00000002349	Creg1	Enhancers_Liver_4901,Enhancers_Liver_4906,Enhancers_Liver_4908
ENSFDAG00000021140	Cd247	Enhancers_Liver_4911
ENSFDAG00000006716	Pou2f1	Enhancers_Liver_4911
ENSFDAG00000018008	Pbx1	Enhancers_Liver_4975,Enhancers_Liver_4988
ENSFDAG00000008105	Lmx1a	Enhancers_Liver_4975,Enhancers_Liver_4988
ENSFDAG00000008235	Lmf1	Enhancers_Liver_36937
ENSFDAG00000004821	Gng13	Enhancers_Liver_36937
ENSFDAG00000015185	Hsd17b7	Enhancers_Liver_5050,Enhancers_Liver_5054
ENSFDAG00000000975	Ddr2	Enhancers_Liver_5050,Enhancers_Liver_5054
ENSFDAG00000013887	Uap1	Enhancers_Liver_5067
ENSFDAG00000002437	Spata46	Enhancers_Liver_5085,Enhancers_Liver_5092
ENSFDAG00000017114	Nos1ap	Enhancers_Liver_5085,Enhancers_Liver_5092
ENSFDAG00000006223	Olfml2b	Enhancers_Liver_5111,Enhancers_Liver_5117
ENSFDAG00000006016	Atf6	Enhancers_Liver_5111,Enhancers_Liver_5117
ENSFDAG00000019127	Fcrla	Enhancers_Liver_5142,Enhancers_Liver_5144
ENSFDAG00000005799	Fcgr4	Enhancers_Liver_5142,Enhancers_Liver_5144
ENSFDAG00000006011	Ndufa4	Enhancers_Liver_5158
ENSFDAG00000021064	Pcp4l1	Enhancers_Liver_5164,Enhancers_Liver_5166
ENSFDAG00000012957	N.A	Enhancers_Liver_5166
ENSFDAG00000003555	B4galt3	Enhancers_Liver_5184
ENSFDAG00000021112	Vdac1	Enhancers_Liver_5205,Enhancers_Liver_5207
ENSFDAG00000002666	Slamf7	Enhancers_Liver_5205,Enhancers_Liver_5207
ENSFDAG00000006495	Slamf1	Enhancers_Liver_5215
ENSFDAG00000009824	Cd84	Enhancers_Liver_5215,Enhancers_Liver_5217
ENSFDAG00000012990	Crp	Enhancers_Liver_5285,Enhancers_Liver_5286,Enhancers_Liver_5289
ENSFDAG00000000762	Apcs	Enhancers_Liver_5285,Enhancers_Liver_5286,Enhancers_Liver_5289,Enhancers_Liver_5292
ENSFDAG00000016862	Olfr16	Enhancers_Liver_5292
ENSFDAG00000013828	Mptx2	Enhancers_Liver_5302,Enhancers_Liver_5303
ENSFDAG00000000918	Ackr1	Enhancers_Liver_5302,Enhancers_Liver_5303
ENSFDAG00000008634	Ifi203	Enhancers_Liver_5313
ENSFDAG00000019236	N.A	Enhancers_Liver_5313
ENSFDAG00000017263	Fh1	Enhancers_Liver_5355
ENSFDAG00000016739	Sdccag8	Enhancers_Liver_5384
ENSFDAG00000018752	Akt3	Enhancers_Liver_5384
ENSFDAG00000015912	Zbtb18	Enhancers_Liver_5408
ENSFDAG00000006367	1700016C15Rik	Enhancers_Liver_5408
ENSFDAG00000019326	Dcun1d5	Enhancers_Liver_5496,Enhancers_Liver_5504
ENSFDAG00000015574	Coq8a	Enhancers_Liver_5496,Enhancers_Liver_5504
ENSFDAG00000009350	Sde2	Enhancers_Liver_5569
ENSFDAG00000017275	Dusp10	Enhancers_Liver_5732,Enhancers_Liver_5739,Enhancers_Liver_5747,Enhancers_Liver_5755,Enhancers_Liver_5758
ENSFDAG00000021435	Hlx	Enhancers_Liver_5732,Enhancers_Liver_5739,Enhancers_Liver_5747,Enhancers_Liver_5755,Enhancers_Liver_5758,Enhancers_Liver_5773
ENSFDAG00000021307	Eprs	Enhancers_Liver_5815
ENSFDAG00000007320	Lyplal1	Enhancers_Liver_5815,Enhancers_Liver_5836,Enhancers_Liver_5838,Enhancers_Liver_5857
ENSFDAG00000012435	Tgfb2	Enhancers_Liver_5836,Enhancers_Liver_5838,Enhancers_Liver_5857
ENSFDAG00000008323	Pacc1	Enhancers_Liver_6009
ENSFDAG00000012719	Ppp2r5a	Enhancers_Liver_6009
ENSFDAG00000019705	Ftl1	Enhancers_Liver_6019,Enhancers_Liver_6020,Enhancers_Liver_6025
ENSFDAG00000005004	Ints7	Enhancers_Liver_6019,Enhancers_Liver_6020,Enhancers_Liver_6025
ENSFDAG00000008216	Lpgat1	Enhancers_Liver_6066
ENSFDAG00000017351	Nek2	Enhancers_Liver_6066
ENSFDAG00000008752	Lamb3	Enhancers_Liver_6151
ENSFDAG00000013684	Camk1g	Enhancers_Liver_6151
ENSFDAG00000020775	Cd34	Enhancers_Liver_6269,Enhancers_Liver_6280
ENSFDAG00000017165	Cr1l	Enhancers_Liver_6269,Enhancers_Liver_6280
ENSFDAG00000019132	Esr1	Enhancers_Liver_6385,Enhancers_Liver_6386
ENSFDAG00000016136	N.A	Enhancers_Liver_6385,Enhancers_Liver_6386
ENSFDAG00000015788	N.A	Enhancers_Liver_6431
ENSFDAG00000015902	N.A	Enhancers_Liver_6431
ENSFDAG00000014573	Myct1	Enhancers_Liver_6452
ENSFDAG00000014723	Ipcef1	Enhancers_Liver_6463,Enhancers_Liver_6464
ENSFDAG00000020864	Cnksr3	Enhancers_Liver_59658,Enhancers_Liver_6464,Enhancers_Liver_6484
ENSFDAG00000010335	Scaf8	Enhancers_Liver_59658,Enhancers_Liver_6484
ENSFDAG00000000874	Zc3h12d	Enhancers_Liver_6502,Enhancers_Liver_6503
ENSFDAG00000008146	Ppil4	Enhancers_Liver_6502
ENSFDAG00000011176	Tab2	Enhancers_Liver_6526
ENSFDAG00000000859	Ust	Enhancers_Liver_6546
ENSFDAG00000017132	Gnrh1	Enhancers_Liver_27724
ENSFDAG00000017465	Dock5	Enhancers_Liver_27724
ENSFDAG00000005242	Sash1	Enhancers_Liver_6546,Enhancers_Liver_6591
ENSFDAG00000017156	Samd5	Enhancers_Liver_6591
ENSFDAG00000008123	N.A	Enhancers_Liver_6645
ENSFDAG00000012026	Grm1	Enhancers_Liver_6645
ENSFDAG00000009028	Tnfaip3	Enhancers_Liver_6962,Enhancers_Liver_6964,Enhancers_Liver_6966
ENSFDAG00000010015	Il22ra2	Enhancers_Liver_6962,Enhancers_Liver_6964,Enhancers_Liver_6966
ENSFDAG00000016466	Pex7	Enhancers_Liver_6984
ENSFDAG00000003960	Map3k5	Enhancers_Liver_6984
ENSFDAG00000018815	Mtfr2	Enhancers_Liver_7034,Enhancers_Liver_7035
ENSFDAG00000020411	Pde7b	Enhancers_Liver_7034,Enhancers_Liver_7035
ENSFDAG00000019079	Aldh8a1	Enhancers_Liver_7111,Enhancers_Liver_7119,Enhancers_Liver_7120,Enhancers_Liver_7144,Enhancers_Liver_7145,Enhancers_Liver_7151,Enhancers_Liver_7153,Enhancers_Liver_7156
ENSFDAG00000005816	Rpl36a	Enhancers_Liver_7111,Enhancers_Liver_7119,Enhancers_Liver_7120,Enhancers_Liver_7144,Enhancers_Liver_7145,Enhancers_Liver_7151,Enhancers_Liver_7153,Enhancers_Liver_7156
ENSFDAG00000015024	Tbpl1	Enhancers_Liver_7186
ENSFDAG00000021436	Tcf21	Enhancers_Liver_7186
ENSFDAG00000012552	Stx7	Enhancers_Liver_7231
ENSFDAG00000019094	Moxd1	Enhancers_Liver_7231
ENSFDAG00000021047	N.A	Enhancers_Liver_7333,Enhancers_Liver_7335
ENSFDAG00000018438	Epb41l2	Enhancers_Liver_7333,Enhancers_Liver_7335,Enhancers_Liver_7339,Enhancers_Liver_7340,Enhancers_Liver_7342
ENSFDAG00000014743	Smlr1	Enhancers_Liver_7339,Enhancers_Liver_7340,Enhancers_Liver_7342,Enhancers_Liver_7349
ENSFDAG00000009064	Tmem200a	Enhancers_Liver_7349
ENSFDAG00000012322	Samd3	Enhancers_Liver_7387
ENSFDAG00000017139	L3mbtl3	Enhancers_Liver_7387
ENSFDAG00000010406	Arhgap18	Enhancers_Liver_7402,Enhancers_Liver_7404
ENSFDAG00000017494	Lama2	Enhancers_Liver_7419
ENSFDAG00000006304	Ptprk	Enhancers_Liver_7425,Enhancers_Liver_7467
ENSFDAG00000018289	Themis	Enhancers_Liver_7425,Enhancers_Liver_7467
ENSFDAG00000015116	Qrsl1	Enhancers_Liver_7923,Enhancers_Liver_7931
ENSFDAG00000020366	Cd24a	Enhancers_Liver_7923,Enhancers_Liver_7931
ENSFDAG00000013511	Prep	Enhancers_Liver_7965,Enhancers_Liver_7966,Enhancers_Liver_7968,Enhancers_Liver_7974,Enhancers_Liver_8000,Enhancers_Liver_8007
ENSFDAG00000013748	Prdm1	Enhancers_Liver_7965,Enhancers_Liver_7966,Enhancers_Liver_7968,Enhancers_Liver_7974
ENSFDAG00000000883	Popdc3	Enhancers_Liver_8007
ENSFDAG00000016347	Bves	Enhancers_Liver_8013
ENSFDAG00000006141	Lin28b	Enhancers_Liver_8013
ENSFDAG00000017438	Ros1	Enhancers_Liver_8070
ENSFDAG00000007556	Dcbld1	Enhancers_Liver_8070,Enhancers_Liver_8076
ENSFDAG00000007602	Gopc	Enhancers_Liver_8076
ENSFDAG00000012967	Lims1	Enhancers_Liver_8227,Enhancers_Liver_8228
ENSFDAG00000018281	N.A	Enhancers_Liver_8263
ENSFDAG00000017783	Man2a1	Enhancers_Liver_38387,Enhancers_Liver_38388,Enhancers_Liver_38389,Enhancers_Liver_38402,Enhancers_Liver_38404
ENSFDAG00000014123	Tmem232	Enhancers_Liver_38387,Enhancers_Liver_38388,Enhancers_Liver_38389,Enhancers_Liver_38402,Enhancers_Liver_38404
ENSFDAG00000017769	Hk3	Enhancers_Liver_22804,Enhancers_Liver_22805
ENSFDAG00000013332	Unc5a	Enhancers_Liver_22804
ENSFDAG00000006160	Pfdn1	Enhancers_Liver_22856,Enhancers_Liver_22861
ENSFDAG00000009293	Macroh2a1	Enhancers_Liver_22861,Enhancers_Liver_22863
ENSFDAG00000002916	Herc4	Enhancers_Liver_8499
ENSFDAG00000009892	Sirt1	Enhancers_Liver_8499
ENSFDAG00000003400	Reep3	Enhancers_Liver_8546,Enhancers_Liver_8566
ENSFDAG00000011063	N.A	Enhancers_Liver_8546,Enhancers_Liver_8566
ENSFDAG00000019445	Zfp365	Enhancers_Liver_8601
ENSFDAG00000000891	Ado	Enhancers_Liver_8601
ENSFDAG00000001543	Arid5b	Enhancers_Liver_8635,Enhancers_Liver_8639,Enhancers_Liver_8640,Enhancers_Liver_8650,Enhancers_Liver_8651,Enhancers_Liver_8657,Enhancers_Liver_8658,Enhancers_Liver_8659,Enhancers_Liver_8662,Enhancers_Liver_8672,Enhancers_Liver_8674
ENSFDAG00000000091	Cabcoco1	Enhancers_Liver_8635,Enhancers_Liver_8639,Enhancers_Liver_8640,Enhancers_Liver_8650,Enhancers_Liver_8651,Enhancers_Liver_8657,Enhancers_Liver_8658,Enhancers_Liver_8659,Enhancers_Liver_8662,Enhancers_Liver_8672,Enhancers_Liver_8674
ENSFDAG00000015994	Tmem26	Enhancers_Liver_8686,Enhancers_Liver_8711
ENSFDAG00000003292	Rhobtb1	Enhancers_Liver_8686,Enhancers_Liver_8711,Enhancers_Liver_8723
ENSFDAG00000003819	Cdk1	Enhancers_Liver_8723
ENSFDAG00000018083	Rasgrp3	Enhancers_Liver_38807,Enhancers_Liver_38811,Enhancers_Liver_38819
ENSFDAG00000005213	Ltbp1	Enhancers_Liver_38807,Enhancers_Liver_38811,Enhancers_Liver_38819
ENSFDAG00000013627	Specc1l	Enhancers_Liver_8895
ENSFDAG00000007747	Adora2a	Enhancers_Liver_8895
ENSFDAG00000007968	Upb1	Enhancers_Liver_8930,Enhancers_Liver_8939,Enhancers_Liver_8940
ENSFDAG00000011566	Gucd1	Enhancers_Liver_8930,Enhancers_Liver_8939,Enhancers_Liver_8940
ENSFDAG00000009951	Chchd10	Enhancers_Liver_8992
ENSFDAG00000007786	Vpreb3	Enhancers_Liver_8992
ENSFDAG00000005244	N.A	Enhancers_Liver_9082
ENSFDAG00000009141	Ndufs7	Enhancers_Liver_9175
ENSFDAG00000009491	Pwwp3a	Enhancers_Liver_9175
ENSFDAG00000001283	Dazap1	Enhancers_Liver_9180
ENSFDAG00000018218	Rps15	Enhancers_Liver_9180
ENSFDAG00000009168	Mknk2	Enhancers_Liver_9214
ENSFDAG00000004373	Rars	Enhancers_Liver_12368
ENSFDAG00000011329	Rfx4	Enhancers_Liver_9392
ENSFDAG00000008605	Ric8b	Enhancers_Liver_9392
ENSFDAG00000004491	Mterf2	Enhancers_Liver_9413
ENSFDAG00000004511	Cry1	Enhancers_Liver_9413
ENSFDAG00000009055	Gas2l3	Enhancers_Liver_9656,Enhancers_Liver_9661
ENSFDAG00000000806	Nr1h4	Enhancers_Liver_9656,Enhancers_Liver_9661,Enhancers_Liver_9667,Enhancers_Liver_9668,Enhancers_Liver_9676
ENSFDAG00000000977	Slc17a8	Enhancers_Liver_9667,Enhancers_Liver_9668,Enhancers_Liver_9676
ENSFDAG00000013710	Uhrf1bp1l	Enhancers_Liver_9692
ENSFDAG00000008045	Anks1b	Enhancers_Liver_9716
ENSFDAG00000010481	Ppp2ca	Enhancers_Liver_9716,Enhancers_Liver_9718
ENSFDAG00000018649	Apaf1	Enhancers_Liver_9718
ENSFDAG00000018100	Bcl9l	Enhancers_Liver_85229,Enhancers_Liver_85230
ENSFDAG00000009749	Cxcr5	Enhancers_Liver_85229,Enhancers_Liver_85230
ENSFDAG00000015308	N.A	Enhancers_Liver_9972,Enhancers_Liver_9976
ENSFDAG00000010791	Cradd	Enhancers_Liver_9972,Enhancers_Liver_9976
ENSFDAG00000010190	Nudt4	Enhancers_Liver_10059,Enhancers_Liver_10060
ENSFDAG00000000498	Eea1	Enhancers_Liver_10059,Enhancers_Liver_10060
ENSFDAG00000013272	Birc3	Enhancers_Liver_84066
ENSFDAG00000014563	Btg1c	Enhancers_Liver_10118,Enhancers_Liver_10121,Enhancers_Liver_10122
ENSFDAG00000009571	Dcn	Enhancers_Liver_10142,Enhancers_Liver_10146
ENSFDAG00000005708	Lum	Enhancers_Liver_10142,Enhancers_Liver_10146
ENSFDAG00000001780	Atp2b1	Enhancers_Liver_10167,Enhancers_Liver_10172,Enhancers_Liver_10173,Enhancers_Liver_10174
ENSFDAG00000020160	Poc1b	Enhancers_Liver_10194,Enhancers_Liver_10198,Enhancers_Liver_10243
ENSFDAG00000008181	Dusp6	Enhancers_Liver_10194,Enhancers_Liver_10198,Enhancers_Liver_10243
ENSFDAG00000004009	Tmtc2	Enhancers_Liver_10286
ENSFDAG00000007271	Pawr	Enhancers_Liver_10357,Enhancers_Liver_10360,Enhancers_Liver_10374
ENSFDAG00000013889	Syt1	Enhancers_Liver_10357,Enhancers_Liver_10360,Enhancers_Liver_10374
ENSFDAG00000006014	Osbpl8	Enhancers_Liver_10429
ENSFDAG00000017687	Bbs10	Enhancers_Liver_10429,Enhancers_Liver_10434,Enhancers_Liver_10438
ENSFDAG00000004093	Nap1l1	Enhancers_Liver_10434,Enhancers_Liver_10438
ENSFDAG00000017297	Phlda1	Enhancers_Liver_10478,Enhancers_Liver_10483,Enhancers_Liver_10484
ENSFDAG00000019270	Krr1	Enhancers_Liver_10478,Enhancers_Liver_10483,Enhancers_Liver_10484
ENSFDAG00000011196	Ptprr	Enhancers_Liver_10545
ENSFDAG00000003534	Ptprb	Enhancers_Liver_10545
ENSFDAG00000016424	N.A	Enhancers_Liver_10590
ENSFDAG00000002281	Cpsf6	Enhancers_Liver_10608,Enhancers_Liver_14328
ENSFDAG00000008961	Cpm	Enhancers_Liver_10608,Enhancers_Liver_14328
ENSFDAG00000006316	Hmga2	Enhancers_Liver_10724
ENSFDAG00000015015	Msrb3	Enhancers_Liver_10724
ENSFDAG00000021218	Gns	Enhancers_Liver_10772
ENSFDAG00000014280	Rassf3	Enhancers_Liver_10772,Enhancers_Liver_10781
ENSFDAG00000010241	Tbk1	Enhancers_Liver_10781
ENSFDAG00000003690	Kics2	Enhancers_Liver_10799,Enhancers_Liver_10802,Enhancers_Liver_10805
ENSFDAG00000015625	Srgap1	Enhancers_Liver_10799,Enhancers_Liver_10802,Enhancers_Liver_10805
ENSFDAG00000006046	Ppm1h	Enhancers_Liver_10845,Enhancers_Liver_10882
ENSFDAG00000006734	Mon2	Enhancers_Liver_10845,Enhancers_Liver_10882
ENSFDAG00000011474	Usp15	Enhancers_Liver_10914
ENSFDAG00000001396	Tafa2	Enhancers_Liver_10914
ENSFDAG00000001904	Ndufa4l2	Enhancers_Liver_11064,Enhancers_Liver_11065
ENSFDAG00000012985	Shmt2	Enhancers_Liver_11064,Enhancers_Liver_11065,Enhancers_Liver_11070
ENSFDAG00000017848	Lrp1	Enhancers_Liver_11070
ENSFDAG00000010704	Tac2	Enhancers_Liver_11085
ENSFDAG00000019541	Gpr182	Enhancers_Liver_11085,Enhancers_Liver_11089
ENSFDAG00000018683	Rdh16f2	Enhancers_Liver_11089
ENSFDAG00000006286	Gls2	Enhancers_Liver_11128,Enhancers_Liver_11130
ENSFDAG00000012598	Spryd4	Enhancers_Liver_11128,Enhancers_Liver_11130
ENSFDAG00000017825	Cs	Enhancers_Liver_11138,Enhancers_Liver_11141
ENSFDAG00000016668	Coq10a	Enhancers_Liver_11138,Enhancers_Liver_11141
ENSFDAG00000001599	Rps26	Enhancers_Liver_11166,Enhancers_Liver_11168,Enhancers_Liver_11172
ENSFDAG00000020175	Ikzf4	Enhancers_Liver_11168,Enhancers_Liver_11172
ENSFDAG00000007524	Sec14l2	Enhancers_Liver_11282
ENSFDAG00000006372	Mtmr3	Enhancers_Liver_11337
ENSFDAG00000019393	Ascc2	Enhancers_Liver_11337
ENSFDAG00000006486	Ap1b1	Enhancers_Liver_11392
ENSFDAG00000008657	Rasl10a	Enhancers_Liver_11392
ENSFDAG00000007130	Emid1	Enhancers_Liver_11402
ENSFDAG00000009367	Rhbdd3	Enhancers_Liver_11402
ENSFDAG00000009051	Kremen1	Enhancers_Liver_11432,Enhancers_Liver_11433,Enhancers_Liver_11434
ENSFDAG00000010794	Znrf3	Enhancers_Liver_11432,Enhancers_Liver_11433,Enhancers_Liver_11434
ENSFDAG00000001407	Rmc1	Enhancers_Liver_40199
ENSFDAG00000009997	Npc1	Enhancers_Liver_40199,Enhancers_Liver_40207
ENSFDAG00000017509	Ell2	Enhancers_Liver_23386
ENSFDAG00000020610	Etaa1	Enhancers_Liver_11726,Enhancers_Liver_11729,Enhancers_Liver_11730
ENSFDAG00000012688	Meis1	Enhancers_Liver_11726,Enhancers_Liver_11729,Enhancers_Liver_11730
ENSFDAG00000011259	Gm5065	Enhancers_Liver_11793
ENSFDAG00000011673	Peli1	Enhancers_Liver_11793
ENSFDAG00000006458	Ehbp1	Enhancers_Liver_11876,Enhancers_Liver_11882
ENSFDAG00000009448	Tmem17	Enhancers_Liver_11876,Enhancers_Liver_11882,Enhancers_Liver_11894,Enhancers_Liver_11909
ENSFDAG00000012824	B3gnt2	Enhancers_Liver_11894,Enhancers_Liver_11909
ENSFDAG00000012381	Ccdc85a	Enhancers_Liver_12035
ENSFDAG00000005689	Efemp1	Enhancers_Liver_12035
ENSFDAG00000018063	Bod1	Enhancers_Liver_12174
ENSFDAG00000009581	Cradd	Enhancers_Liver_12174
ENSFDAG00000003904	Stk10	Enhancers_Liver_12262
ENSFDAG00000011716	Fbxw11	Enhancers_Liver_12262
ENSFDAG00000011418	Dad1	Enhancers_Liver_26933,Enhancers_Liver_26935,Enhancers_Liver_26943
ENSFDAG00000006717	Kcnmb1	Enhancers_Liver_12294
ENSFDAG00000001486	Lcp2	Enhancers_Liver_12294
ENSFDAG00000012578	Wwc1	Enhancers_Liver_12368
ENSFDAG00000014447	Tenm2	Enhancers_Liver_12399,Enhancers_Liver_12400
ENSFDAG00000007744	Bcas1	Enhancers_Liver_52803
ENSFDAG00000014787	Tshz2	Enhancers_Liver_52803
ENSFDAG00000003642	Adam8	Enhancers_Liver_12550
ENSFDAG00000020902	Spef1l	Enhancers_Liver_12550
ENSFDAG00000012399	Mgst2	Enhancers_Liver_54120
ENSFDAG00000017858	Maml3	Enhancers_Liver_54120
ENSFDAG00000009769	Armc1	Enhancers_Liver_53416
ENSFDAG00000006999	Mtfr1	Enhancers_Liver_53416
ENSFDAG00000010710	Sar1b	Enhancers_Liver_12714,Enhancers_Liver_12716
ENSFDAG00000020017	Jade2	Enhancers_Liver_12714,Enhancers_Liver_12716,Enhancers_Liver_12717
ENSFDAG00000005969	Cdkn2aipnl	Enhancers_Liver_12717
ENSFDAG00000002311	N.A	Enhancers_Liver_12817
ENSFDAG00000009282	Slc22a4	Enhancers_Liver_12817
ENSFDAG00000006739	P4ha2	Enhancers_Liver_12826
ENSFDAG00000009971	Csf2	Enhancers_Liver_12826
ENSFDAG00000014736	Cdc42se2	Enhancers_Liver_12848
ENSFDAG00000009471	Lyrm7	Enhancers_Liver_12848
ENSFDAG00000006779	Mprip	Enhancers_Liver_13004
ENSFDAG00000016611	Pld6	Enhancers_Liver_13004
ENSFDAG00000019970	Srebf1	Enhancers_Liver_13073
ENSFDAG00000005461	Tom1l2	Enhancers_Liver_13073
ENSFDAG00000008721	Drc3	Enhancers_Liver_13086
ENSFDAG00000009744	Atpaf2	Enhancers_Liver_13086
ENSFDAG00000021551	Myo15	Enhancers_Liver_13092
ENSFDAG00000011356	Alkbh5	Enhancers_Liver_13092
ENSFDAG00000013791	Chd6	Enhancers_Liver_13105
ENSFDAG00000015034	Psat1	Enhancers_Liver_13105
ENSFDAG00000010351	Kcnj12	Enhancers_Liver_13121,Enhancers_Liver_13122
ENSFDAG00000008338	Map2k3	Enhancers_Liver_13121,Enhancers_Liver_13122
ENSFDAG00000004652	Aldh3a2	Enhancers_Liver_13146,Enhancers_Liver_13147
ENSFDAG00000005749	Slc47a1	Enhancers_Liver_13146,Enhancers_Liver_13147
ENSFDAG00000013739	B9d1	Enhancers_Liver_13151,Enhancers_Liver_13155
ENSFDAG00000016172	Epn2	Enhancers_Liver_13151,Enhancers_Liver_13155
ENSFDAG00000009167	Ntn1	Enhancers_Liver_13374,Enhancers_Liver_13378,Enhancers_Liver_13390,Enhancers_Liver_13401
ENSFDAG00000015856	Stx8	Enhancers_Liver_13374,Enhancers_Liver_13378,Enhancers_Liver_13390,Enhancers_Liver_13401
ENSFDAG00000011820	Myh10	Enhancers_Liver_13436
ENSFDAG00000008724	Ndel1	Enhancers_Liver_13436,Enhancers_Liver_13438,Enhancers_Liver_13442
ENSFDAG00000008322	N.A	Enhancers_Liver_13442,Enhancers_Liver_13447
ENSFDAG00000003956	N.A	Enhancers_Liver_13447
ENSFDAG00000011565	Aurkb	Enhancers_Liver_13454
ENSFDAG00000014425	Tmem107	Enhancers_Liver_13454
ENSFDAG00000006348	Kcnab3	Enhancers_Liver_13473
ENSFDAG00000002582	N.A	Enhancers_Liver_13473
ENSFDAG00000000780	Cyb5d1	Enhancers_Liver_13476
ENSFDAG00000008220	Chd3	Enhancers_Liver_13476
ENSFDAG00000018237	Bcl6b	Enhancers_Liver_13536
ENSFDAG00000008097	Scimp	Enhancers_Liver_13588,Enhancers_Liver_13589,Enhancers_Liver_13592
ENSFDAG00000007936	Rabep1	Enhancers_Liver_13592
ENSFDAG00000011077	Nlrp1b	Enhancers_Liver_57234
ENSFDAG00000001628	Pitpnm3	Enhancers_Liver_13642
ENSFDAG00000016784	4933427D14Rik	Enhancers_Liver_13642
ENSFDAG00000017923	Mybbp1a	Enhancers_Liver_13657,Enhancers_Liver_13666
ENSFDAG00000001526	Spns2	Enhancers_Liver_13657,Enhancers_Liver_13666,Enhancers_Liver_13671,Enhancers_Liver_13672
ENSFDAG00000017889	Spns3	Enhancers_Liver_13671,Enhancers_Liver_13672
ENSFDAG00000013355	Ncbp3	Enhancers_Liver_13726
ENSFDAG00000019217	Itgae	Enhancers_Liver_13726
ENSFDAG00000016268	Adgrv1	Enhancers_Liver_23518
ENSFDAG00000014091	Arrdc3	Enhancers_Liver_23518
ENSFDAG00000013158	Sgsm2	Enhancers_Liver_13775
ENSFDAG00000006038	Tsr1	Enhancers_Liver_13775
ENSFDAG00000015187	Rtn4rl1	Enhancers_Liver_13838
ENSFDAG00000007720	Rpa1	Enhancers_Liver_13838
ENSFDAG00000016069	Pitpna	Enhancers_Liver_13882
ENSFDAG00000016697	Inpp5k	Enhancers_Liver_13882,Enhancers_Liver_13891
ENSFDAG00000008512	Timm22	Enhancers_Liver_13958
ENSFDAG00000008698	Abr	Enhancers_Liver_13958,Enhancers_Liver_13971
ENSFDAG00000018016	Bhlha9	Enhancers_Liver_13971
ENSFDAG00000011385	Tmigd1	Enhancers_Liver_13996
ENSFDAG00000019592	Blmh	Enhancers_Liver_13996,Enhancers_Liver_14005
ENSFDAG00000018277	Slc6a4	Enhancers_Liver_14005
ENSFDAG00000012148	Ssh2	Enhancers_Liver_14030,Enhancers_Liver_14031,Enhancers_Liver_14040,Enhancers_Liver_14041,Enhancers_Liver_14054
ENSFDAG00000013688	Coro6	Enhancers_Liver_14030,Enhancers_Liver_14031,Enhancers_Liver_14040,Enhancers_Liver_14041,Enhancers_Liver_14054
ENSFDAG00000011019	Ankrd13b	Enhancers_Liver_14059
ENSFDAG00000016088	Git1	Enhancers_Liver_14059
ENSFDAG00000003040	Trp53i13	Enhancers_Liver_14059,Enhancers_Liver_14067
ENSFDAG00000014311	N.A	Enhancers_Liver_14067
ENSFDAG00000014546	Myo18a	Enhancers_Liver_14079,Enhancers_Liver_14082,Enhancers_Liver_14086,Enhancers_Liver_14091,Enhancers_Liver_14094,Enhancers_Liver_14096
ENSFDAG00000005579	Pipox	Enhancers_Liver_14082,Enhancers_Liver_14086,Enhancers_Liver_14091,Enhancers_Liver_14094,Enhancers_Liver_14096
ENSFDAG00000001767	Eral1	Enhancers_Liver_14111
ENSFDAG00000012770	Fam222b	Enhancers_Liver_14111
ENSFDAG00000017073	Unc119	Enhancers_Liver_14139
ENSFDAG00000005776	Foxn1	Enhancers_Liver_14139
ENSFDAG00000001862	Slc13a2	Enhancers_Liver_14145,Enhancers_Liver_14146
ENSFDAG00000010847	Tmem97	Enhancers_Liver_14167
ENSFDAG00000019208	Nlk	Enhancers_Liver_14167
ENSFDAG00000012112	Evi2	Enhancers_Liver_14230,Enhancers_Liver_14231,Enhancers_Liver_14232,Enhancers_Liver_14234,Enhancers_Liver_14235
ENSFDAG00000009570	Rab11fip4	Enhancers_Liver_14231,Enhancers_Liver_14232,Enhancers_Liver_14234,Enhancers_Liver_14235,Enhancers_Liver_14242,Enhancers_Liver_14260,Enhancers_Liver_14261,Enhancers_Liver_14276
ENSFDAG00000012855	Coprs	Enhancers_Liver_14242,Enhancers_Liver_14260,Enhancers_Liver_14261,Enhancers_Liver_14276
ENSFDAG00000013302	Ccl5	Enhancers_Liver_14428
ENSFDAG00000005351	N.A	Enhancers_Liver_14428
ENSFDAG00000018790	Hnf1b	Enhancers_Liver_14449
ENSFDAG00000009324	Heatr6	Enhancers_Liver_14449
ENSFDAG00000018545	Mrm1	Enhancers_Liver_14512
ENSFDAG00000000645	Dhrs11	Enhancers_Liver_14512,Enhancers_Liver_14515
ENSFDAG00000011144	Ggnbp2	Enhancers_Liver_14515
ENSFDAG00000013200	Tbx2	Enhancers_Liver_14546,Enhancers_Liver_14555,Enhancers_Liver_14568,Enhancers_Liver_14571,Enhancers_Liver_14572
ENSFDAG00000018036	Bcas3	Enhancers_Liver_14546,Enhancers_Liver_14555,Enhancers_Liver_14568,Enhancers_Liver_14571,Enhancers_Liver_14572
ENSFDAG00000013495	Med13	Enhancers_Liver_14610
ENSFDAG00000013757	Rnft1	Enhancers_Liver_14610
ENSFDAG00000007152	Vmp1	Enhancers_Liver_14628
ENSFDAG00000013600	Tubd1	Enhancers_Liver_14628
ENSFDAG00000017214	Dhx40	Enhancers_Liver_14664,Enhancers_Liver_14671,Enhancers_Liver_14677
ENSFDAG00000017567	N.A	Enhancers_Liver_14664,Enhancers_Liver_14671,Enhancers_Liver_14677
ENSFDAG00000020946	Rnf43	Enhancers_Liver_14729
ENSFDAG00000016718	Supt4a	Enhancers_Liver_14729,Enhancers_Liver_14747,Enhancers_Liver_14749,Enhancers_Liver_14750
ENSFDAG00000007555	Tspoap1	Enhancers_Liver_14747,Enhancers_Liver_14749,Enhancers_Liver_14750
ENSFDAG00000007153	Mrps23	Enhancers_Liver_14809,Enhancers_Liver_14816,Enhancers_Liver_14818,Enhancers_Liver_14825,Enhancers_Liver_14829
ENSFDAG00000016118	Msi2	Enhancers_Liver_14809,Enhancers_Liver_14816,Enhancers_Liver_14818,Enhancers_Liver_14825,Enhancers_Liver_14829,Enhancers_Liver_14847,Enhancers_Liver_14848,Enhancers_Liver_14849
ENSFDAG00000014839	Akap1	Enhancers_Liver_14847,Enhancers_Liver_14848,Enhancers_Liver_14849,Enhancers_Liver_14851
ENSFDAG00000018115	Scpep1	Enhancers_Liver_14851
ENSFDAG00000007109	Mmd	Enhancers_Liver_14925
ENSFDAG00000008738	Hlf	Enhancers_Liver_14925
ENSFDAG00000020129	Kif2b	Enhancers_Liver_14942
ENSFDAG00000007408	Car10	Enhancers_Liver_14942,Enhancers_Liver_14948
ENSFDAG00000017487	Cytip	Enhancers_Liver_14943,Enhancers_Liver_48310,Enhancers_Liver_48311,Enhancers_Liver_48312,Enhancers_Liver_48313,Enhancers_Liver_48314
ENSFDAG00000003167	Acvr1c	Enhancers_Liver_14943,Enhancers_Liver_48318
ENSFDAG00000009656	Utp18	Enhancers_Liver_14948
ENSFDAG00000007121	Abcc3	Enhancers_Liver_15035
ENSFDAG00000008271	Ankrd40	Enhancers_Liver_15035
ENSFDAG00000018797	Slc35b1	Enhancers_Liver_15133
ENSFDAG00000007364	Spop	Enhancers_Liver_15133
ENSFDAG00000014519	Ngfr	Enhancers_Liver_15163
ENSFDAG00000011192	Phb	Enhancers_Liver_15163
ENSFDAG00000002614	Calcoco2	Enhancers_Liver_15188
ENSFDAG00000018368	N.A	Enhancers_Liver_15188
ENSFDAG00000004296	Copz2	Enhancers_Liver_15259
ENSFDAG00000015665	Cdk5rap3	Enhancers_Liver_15259
ENSFDAG00000013167	Scrn2	Enhancers_Liver_15265
ENSFDAG00000014202	Jup	Enhancers_Liver_15453
ENSFDAG00000010512	P3h4	Enhancers_Liver_15453
ENSFDAG00000019224	Ccr10	Enhancers_Liver_15518
ENSFDAG00000017506	Cntnap1	Enhancers_Liver_15518
ENSFDAG00000003516	Sppl2c	Enhancers_Liver_15688
ENSFDAG00000016452	Mapt	Enhancers_Liver_15688
ENSFDAG00000004238	Itgb3	Enhancers_Liver_15718,Enhancers_Liver_15725,Enhancers_Liver_15726,Enhancers_Liver_15727
ENSFDAG00000012740	N.A	Enhancers_Liver_15718,Enhancers_Liver_15725,Enhancers_Liver_15726,Enhancers_Liver_15727
ENSFDAG00000010595	Strada	Enhancers_Liver_15758
ENSFDAG00000004505	Ccdc47	Enhancers_Liver_15758
ENSFDAG00000011263	Cd79b	Enhancers_Liver_15769,Enhancers_Liver_15770
ENSFDAG00000001624	Icam2	Enhancers_Liver_15785
ENSFDAG00000013825	Ern1	Enhancers_Liver_15785
ENSFDAG00000016068	Tex2	Enhancers_Liver_15818,Enhancers_Liver_15825
ENSFDAG00000016584	Pecam1	Enhancers_Liver_15818,Enhancers_Liver_15825
ENSFDAG00000020999	Psmd12	Enhancers_Liver_15893,Enhancers_Liver_15930
ENSFDAG00000009966	N.A	Enhancers_Liver_15930
ENSFDAG00000008065	Helz	Enhancers_Liver_15931
ENSFDAG00000016279	Abca8a	Enhancers_Liver_16106
ENSFDAG00000007722	Abca9	Enhancers_Liver_16106
ENSFDAG00000012886	Sox9	Enhancers_Liver_16245,Enhancers_Liver_16258
ENSFDAG00000006801	Sstr2	Enhancers_Liver_16258
ENSFDAG00000021076	Otop3	Enhancers_Liver_16374,Enhancers_Liver_16377
ENSFDAG00000021386	Hid1	Enhancers_Liver_16374,Enhancers_Liver_16377
ENSFDAG00000020849	Srp68	Enhancers_Liver_31630
ENSFDAG00000014223	Foxj1	Enhancers_Liver_16468
ENSFDAG00000014060	Rnf157	Enhancers_Liver_16468
ENSFDAG00000013759	Ubald2	Enhancers_Liver_16475
ENSFDAG00000012675	Prcd	Enhancers_Liver_16517
ENSFDAG00000010108	St6galnac2	Enhancers_Liver_16517
ENSFDAG00000002464	St6galnac1	Enhancers_Liver_16521,Enhancers_Liver_16525
ENSFDAG00000016293	Jmjd6	Enhancers_Liver_16521,Enhancers_Liver_16525
ENSFDAG00000019279	Syngr2	Enhancers_Liver_87427
ENSFDAG00000005238	Cbx4	Enhancers_Liver_16728,Enhancers_Liver_16733
ENSFDAG00000010550	Tbc1d16	Enhancers_Liver_16728,Enhancers_Liver_16733
ENSFDAG00000019959	Gaa	Enhancers_Liver_16747
ENSFDAG00000020774	Eif4a3l2	Enhancers_Liver_16747
ENSFDAG00000017260	Dnmt3a	Enhancers_Liver_16991
ENSFDAG00000001221	Efr3b	Enhancers_Liver_16991
ENSFDAG00000000237	Atad2b	Enhancers_Liver_17039
ENSFDAG00000003340	Klhl29	Enhancers_Liver_17039,Enhancers_Liver_17040
ENSFDAG00000016727	Trib2	Enhancers_Liver_17252,Enhancers_Liver_17285,Enhancers_Liver_17286,Enhancers_Liver_17287
ENSFDAG00000012547	Lpin1	Enhancers_Liver_17285,Enhancers_Liver_17286,Enhancers_Liver_17287
ENSFDAG00000014821	Pxdn	Enhancers_Liver_17586
ENSFDAG00000013193	Adam17	Enhancers_Liver_17420
ENSFDAG00000006021	Iah1	Enhancers_Liver_17420
ENSFDAG00000021503	Myt1l	Enhancers_Liver_17586
ENSFDAG00000017707	Prkar2b	Enhancers_Liver_17658
ENSFDAG00000017872	Pik3cg	Enhancers_Liver_17658
ENSFDAG00000011850	Sypl	Enhancers_Liver_17745
ENSFDAG00000003188	Cdhr3	Enhancers_Liver_17745,Enhancers_Liver_17749
ENSFDAG00000014555	N.A	Enhancers_Liver_17749,Enhancers_Liver_17771
ENSFDAG00000001127	Atxn7l1	Enhancers_Liver_17771
ENSFDAG00000010313	Snx13	Enhancers_Liver_17813,Enhancers_Liver_17814,Enhancers_Liver_17836,Enhancers_Liver_17851,Enhancers_Liver_17857,Enhancers_Liver_17860,Enhancers_Liver_17861,Enhancers_Liver_17862,Enhancers_Liver_17867,Enhancers_Liver_17869
ENSFDAG00000005741	Ahr	Enhancers_Liver_17813,Enhancers_Liver_17814,Enhancers_Liver_17836,Enhancers_Liver_17851,Enhancers_Liver_17857,Enhancers_Liver_17860,Enhancers_Liver_17861,Enhancers_Liver_17862,Enhancers_Liver_17867,Enhancers_Liver_17869
ENSFDAG00000019045	Arl4a	Enhancers_Liver_18004
ENSFDAG00000009004	Zfp277	Enhancers_Liver_18029,Enhancers_Liver_18034,Enhancers_Liver_18044
ENSFDAG00000009181	Dock4	Enhancers_Liver_18029,Enhancers_Liver_18034,Enhancers_Liver_18044,Enhancers_Liver_18071
ENSFDAG00000016964	Immp2l	Enhancers_Liver_18071
ENSFDAG00000009265	Lrrn3	Enhancers_Liver_18097
ENSFDAG00000013449	Gzmb	Enhancers_Liver_18133,Enhancers_Liver_18134,Enhancers_Liver_18135
ENSFDAG00000021296	Stxbp6	Enhancers_Liver_18133,Enhancers_Liver_18134,Enhancers_Liver_18135
ENSFDAG00000013280	Nubpl	Enhancers_Liver_18209
ENSFDAG00000006186	Arhgap5	Enhancers_Liver_18209
ENSFDAG00000014610	Foxa1	Enhancers_Liver_18351,Enhancers_Liver_18352
ENSFDAG00000010596	Mipol1	Enhancers_Liver_18351,Enhancers_Liver_18352
ENSFDAG00000013918	Gm527	Enhancers_Liver_18412
ENSFDAG00000015079	Nemf	Enhancers_Liver_18458
ENSFDAG00000020010	Arf6	Enhancers_Liver_18458
ENSFDAG00000019344	L2hgdh	Enhancers_Liver_18498
ENSFDAG00000016816	Sos2	Enhancers_Liver_18498
ENSFDAG00000019539	Nin	Enhancers_Liver_18528,Enhancers_Liver_18529
ENSFDAG00000020930	Sav1	Enhancers_Liver_18528,Enhancers_Liver_18529
ENSFDAG00000019268	Trim9	Enhancers_Liver_18575
ENSFDAG00000008684	Tmx1	Enhancers_Liver_18575,Enhancers_Liver_18599,Enhancers_Liver_18604
ENSFDAG00000014158	Frmd6	Enhancers_Liver_18599,Enhancers_Liver_18604,Enhancers_Liver_25466
ENSFDAG00000008200	Gng2	Enhancers_Liver_25448,Enhancers_Liver_25466
ENSFDAG00000020917	Psma3	Enhancers_Liver_18617
ENSFDAG00000005958	Arid4a	Enhancers_Liver_18617
ENSFDAG00000006183	Dact1	Enhancers_Liver_18633,Enhancers_Liver_18640,Enhancers_Liver_18641,Enhancers_Liver_18642
ENSFDAG00000007851	Daam1	Enhancers_Liver_18633,Enhancers_Liver_18640,Enhancers_Liver_18641,Enhancers_Liver_18642
ENSFDAG00000010997	Ppm1a	Enhancers_Liver_18750,Enhancers_Liver_18754
ENSFDAG00000009884	4930447C04Rik	Enhancers_Liver_18750,Enhancers_Liver_18754
ENSFDAG00000007236	Prkch	Enhancers_Liver_18765,Enhancers_Liver_18773,Enhancers_Liver_18787,Enhancers_Liver_18795,Enhancers_Liver_18829,Enhancers_Liver_18833,Enhancers_Liver_18836
ENSFDAG00000012519	Slc38a6	Enhancers_Liver_18765,Enhancers_Liver_18773
ENSFDAG00000007186	Hif1a	Enhancers_Liver_18787,Enhancers_Liver_18795,Enhancers_Liver_18829,Enhancers_Liver_18833,Enhancers_Liver_18836
ENSFDAG00000002715	Rhoj	Enhancers_Liver_18856
ENSFDAG00000012613	Gphb5	Enhancers_Liver_18856
ENSFDAG00000012007	Mthfd1	Enhancers_Liver_18954,Enhancers_Liver_18955
ENSFDAG00000014505	Zbtb25	Enhancers_Liver_18954,Enhancers_Liver_18955
ENSFDAG00000012716	Max	Enhancers_Liver_19015
ENSFDAG00000010240	Npm1	Enhancers_Liver_19015
ENSFDAG00000000548	Rad51b	Enhancers_Liver_19108,Enhancers_Liver_19119,Enhancers_Liver_19128,Enhancers_Liver_19144,Enhancers_Liver_19145,Enhancers_Liver_19162,Enhancers_Liver_19204,Enhancers_Liver_19220
ENSFDAG00000014938	Zfp36l1	Enhancers_Liver_19108,Enhancers_Liver_19119,Enhancers_Liver_19128,Enhancers_Liver_19144,Enhancers_Liver_19145,Enhancers_Liver_19162,Enhancers_Liver_19204,Enhancers_Liver_19220
ENSFDAG00000010725	Actn1	Enhancers_Liver_19259,Enhancers_Liver_19274,Enhancers_Liver_19276,Enhancers_Liver_19279
ENSFDAG00000010434	Dcaf5	Enhancers_Liver_19274,Enhancers_Liver_19276,Enhancers_Liver_19279
ENSFDAG00000007286	Plekhd1	Enhancers_Liver_19308
ENSFDAG00000019183	Susd6	Enhancers_Liver_19308
ENSFDAG00000016296	Smoc1	Enhancers_Liver_19356,Enhancers_Liver_19385
ENSFDAG00000020001	Slc8a3	Enhancers_Liver_19356,Enhancers_Liver_19385
ENSFDAG00000008077	Pcnx	Enhancers_Liver_19417
ENSFDAG00000009219	Sipa1l1	Enhancers_Liver_19417,Enhancers_Liver_19433,Enhancers_Liver_19434
ENSFDAG00000017037	Rgs6	Enhancers_Liver_19433,Enhancers_Liver_19434
ENSFDAG00000003311	Gtf2a1	Enhancers_Liver_19876,Enhancers_Liver_19879,Enhancers_Liver_19880
ENSFDAG00000008317	Dnal1	Enhancers_Liver_19559,Enhancers_Liver_19562
ENSFDAG00000005478	Mideas	Enhancers_Liver_19559,Enhancers_Liver_19562,Enhancers_Liver_19570
ENSFDAG00000008585	Ptgr2	Enhancers_Liver_19570
ENSFDAG00000020788	Abcd4	Enhancers_Liver_19595
ENSFDAG00000007310	Syndig1l	Enhancers_Liver_19595
ENSFDAG00000009379	Wars2	Enhancers_Liver_55811
ENSFDAG00000000195	Micu2	Enhancers_Liver_55811
ENSFDAG00000007970	Eif2b2	Enhancers_Liver_19635
ENSFDAG00000008019	Mlh3	Enhancers_Liver_19635
ENSFDAG00000020836	Nek9	Enhancers_Liver_19656,Enhancers_Liver_19657,Enhancers_Liver_19658
ENSFDAG00000009281	Tmed10	Enhancers_Liver_19656,Enhancers_Liver_19657,Enhancers_Liver_19658,Enhancers_Liver_19673,Enhancers_Liver_19674,Enhancers_Liver_19684
ENSFDAG00000008064	Fos	Enhancers_Liver_19673,Enhancers_Liver_19674,Enhancers_Liver_19684
ENSFDAG00000013341	Flvcr2	Enhancers_Liver_19710
ENSFDAG00000013509	Erg28	Enhancers_Liver_19710
ENSFDAG00000004422	Vash1	Enhancers_Liver_19755,Enhancers_Liver_19758
ENSFDAG00000002450	Angel1	Enhancers_Liver_19755,Enhancers_Liver_19758
ENSFDAG00000013734	Lrrc74a	Enhancers_Liver_19770,Enhancers_Liver_19772
ENSFDAG00000011487	Irf2bpl	Enhancers_Liver_19770,Enhancers_Liver_19772
ENSFDAG00000014058	Cipc	Enhancers_Liver_19797
ENSFDAG00000019315	Zdhhc22	Enhancers_Liver_19797
ENSFDAG00000004302	Usp1	Enhancers_Liver_19830
ENSFDAG00000018692	Angptl3	Enhancers_Liver_19830
ENSFDAG00000007843	Ston2	Enhancers_Liver_19876,Enhancers_Liver_19879,Enhancers_Liver_19880,Enhancers_Liver_19890,Enhancers_Liver_19891
ENSFDAG00000010840	Sel1l	Enhancers_Liver_19890,Enhancers_Liver_19891
ENSFDAG00000015851	Nelfcd	Enhancers_Liver_19920
ENSFDAG00000001530	Flrt2	Enhancers_Liver_19928
ENSFDAG00000001288	Ttc8	Enhancers_Liver_19984,Enhancers_Liver_19985,Enhancers_Liver_20020,Enhancers_Liver_20023,Enhancers_Liver_20030
ENSFDAG00000019081	Foxn3	Enhancers_Liver_19984,Enhancers_Liver_19985,Enhancers_Liver_20020,Enhancers_Liver_20023,Enhancers_Liver_20030,Enhancers_Liver_20044,Enhancers_Liver_20045,Enhancers_Liver_20067
ENSFDAG00000010245	Efcab11	Enhancers_Liver_20044,Enhancers_Liver_20045,Enhancers_Liver_20067
ENSFDAG00000019931	Gpr68	Enhancers_Liver_20148
ENSFDAG00000009617	Ccdc88c	Enhancers_Liver_20148
ENSFDAG00000021463	Serpina1f	Enhancers_Liver_20179,Enhancers_Liver_20184
ENSFDAG00000008940	Trip11	Enhancers_Liver_20179,Enhancers_Liver_20184
ENSFDAG00000007293	Slc24a4	Enhancers_Liver_20192
ENSFDAG00000011797	Fam181a	Enhancers_Liver_20279,Enhancers_Liver_20281
ENSFDAG00000005666	Asb2	Enhancers_Liver_20279,Enhancers_Liver_20281
ENSFDAG00000015758	Ppp4r4	Enhancers_Liver_20305
ENSFDAG00000008977	Serpina10	Enhancers_Liver_20305
ENSFDAG00000014974	Serpina11	Enhancers_Liver_20360
ENSFDAG00000019816	Serpina9	Enhancers_Liver_20360
ENSFDAG00000021287	Dicer1	Enhancers_Liver_53312
ENSFDAG00000017101	Clmn	Enhancers_Liver_53312
ENSFDAG00000017903	Eml1	Enhancers_Liver_20533,Enhancers_Liver_20536
ENSFDAG00000017097	Evl	Enhancers_Liver_20533,Enhancers_Liver_20536
ENSFDAG00000010152	Slc35g2	Enhancers_Liver_20575
ENSFDAG00000017333	Nck1	Enhancers_Liver_20575
ENSFDAG00000009079	Ckb	Enhancers_Liver_20663
ENSFDAG00000007454	Trmt61a	Enhancers_Liver_20663
ENSFDAG00000012219	Rd3l	Enhancers_Liver_20705
ENSFDAG00000016283	Kif26a	Enhancers_Liver_20705
ENSFDAG00000004999	Adssl1	Enhancers_Liver_20739
ENSFDAG00000018662	Siva1	Enhancers_Liver_20739
ENSFDAG00000007591	Ighg1	Enhancers_Liver_20781,Enhancers_Liver_20782,Enhancers_Liver_20783
ENSFDAG00000001071	Dnah11	Enhancers_Liver_20831,Enhancers_Liver_20842,Enhancers_Liver_20844
ENSFDAG00000006156	Cdca7l	Enhancers_Liver_20831,Enhancers_Liver_20842
ENSFDAG00000011412	Sp4	Enhancers_Liver_20844
ENSFDAG00000014658	Asb13	Enhancers_Liver_20876,Enhancers_Liver_20886,Enhancers_Liver_20897
ENSFDAG00000017181	Net1	Enhancers_Liver_20876,Enhancers_Liver_20886,Enhancers_Liver_20897
ENSFDAG00000008681	Akr1e1	Enhancers_Liver_20980
ENSFDAG00000012934	Klf6	Enhancers_Liver_20980
ENSFDAG00000009221	Zmynd11	Enhancers_Liver_21114,Enhancers_Liver_21115
ENSFDAG00000018416	Dip2c	Enhancers_Liver_21114,Enhancers_Liver_21115
ENSFDAG00000021196	Inhba	Enhancers_Liver_21220,Enhancers_Liver_21222,Enhancers_Liver_21223
ENSFDAG00000011467	Mep1b	Enhancers_Liver_40480
ENSFDAG00000014071	N.A	Enhancers_Liver_21220,Enhancers_Liver_21222,Enhancers_Liver_21223
ENSFDAG00000018465	Gpr141	Enhancers_Liver_21295,Enhancers_Liver_21305,Enhancers_Liver_21307,Enhancers_Liver_21309
ENSFDAG00000013608	Elmo1	Enhancers_Liver_21295,Enhancers_Liver_21305,Enhancers_Liver_21307,Enhancers_Liver_21309
ENSFDAG00000000272	H3c8	Enhancers_Liver_21332
ENSFDAG00000006774	Cmah	Enhancers_Liver_21395
ENSFDAG00000007238	Ripor2	Enhancers_Liver_21409,Enhancers_Liver_21412,Enhancers_Liver_21417,Enhancers_Liver_21420
ENSFDAG00000018667	N.A	Enhancers_Liver_21409,Enhancers_Liver_21412,Enhancers_Liver_21417,Enhancers_Liver_21420
ENSFDAG00000012265	Acot13	Enhancers_Liver_21430
ENSFDAG00000018652	BC005537	Enhancers_Liver_21430
ENSFDAG00000017223	Aldh5a1	Enhancers_Liver_21444
ENSFDAG00000012529	D130043K22Rik	Enhancers_Liver_21444
ENSFDAG00000015873	Mrs2	Enhancers_Liver_21457
ENSFDAG00000020984	Gpld1	Enhancers_Liver_21457
ENSFDAG00000001458	Exoc2	Enhancers_Liver_21602
ENSFDAG00000013920	Gmds	Enhancers_Liver_21602
ENSFDAG00000018152	Ripk1	Enhancers_Liver_21662
ENSFDAG00000008415	Bphl	Enhancers_Liver_21662
ENSFDAG00000010254	Tmem170	Enhancers_Liver_82945
ENSFDAG00000005713	Cfdp1	Enhancers_Liver_82942,Enhancers_Liver_82945
ENSFDAG00000005660	Edn1	Enhancers_Liver_22141,Enhancers_Liver_22160
ENSFDAG00000017560	Phactr1	Enhancers_Liver_22141,Enhancers_Liver_22160,Enhancers_Liver_22171
ENSFDAG00000007124	Tbc1d7	Enhancers_Liver_22171,Enhancers_Liver_22185
ENSFDAG00000012748	Gfod1	Enhancers_Liver_22185
ENSFDAG00000000233	Rnf182	Enhancers_Liver_22227,Enhancers_Liver_22229,Enhancers_Liver_22230,Enhancers_Liver_22231,Enhancers_Liver_22232
ENSFDAG00000014888	Cd83	Enhancers_Liver_22227,Enhancers_Liver_22229,Enhancers_Liver_22230,Enhancers_Liver_22231,Enhancers_Liver_22232,Enhancers_Liver_22235
ENSFDAG00000000210	Btbd3	Enhancers_Liver_22235,Enhancers_Liver_22254,Enhancers_Liver_22255,Enhancers_Liver_22265,Enhancers_Liver_22270,Enhancers_Liver_22281,Enhancers_Liver_22290
ENSFDAG00000000295	Jarid2	Enhancers_Liver_22254,Enhancers_Liver_22255,Enhancers_Liver_22265,Enhancers_Liver_22270,Enhancers_Liver_22281,Enhancers_Liver_22290
ENSFDAG00000016277	Dtnbp1	Enhancers_Liver_22347
ENSFDAG00000015033	Mylip	Enhancers_Liver_22347
ENSFDAG00000020905	Atxn1	Enhancers_Liver_22371
ENSFDAG00000008552	Stmnd1	Enhancers_Liver_22371
ENSFDAG00000007203	Phf2	Enhancers_Liver_22528,Enhancers_Liver_22533,Enhancers_Liver_22538
ENSFDAG00000018532	Fam120a	Enhancers_Liver_22528,Enhancers_Liver_22533,Enhancers_Liver_22538
ENSFDAG00000014342	Spin1	Enhancers_Liver_22603
ENSFDAG00000013905	Nxnl2	Enhancers_Liver_22603,Enhancers_Liver_22607
ENSFDAG00000002754	S1pr3	Enhancers_Liver_22607
ENSFDAG00000021114	Gadd45g	Enhancers_Liver_22672
ENSFDAG00000020998	Diras2	Enhancers_Liver_22672,Enhancers_Liver_22705
ENSFDAG00000019977	Syk	Enhancers_Liver_22705,Enhancers_Liver_22718,Enhancers_Liver_22724
ENSFDAG00000006707	Auh	Enhancers_Liver_22718,Enhancers_Liver_22724
ENSFDAG00000009715	N.A	Enhancers_Liver_22774
ENSFDAG00000008962	Simc1	Enhancers_Liver_22774
ENSFDAG00000000193	Nop16	Enhancers_Liver_22778
ENSFDAG00000016410	Arl10	Enhancers_Liver_22778
ENSFDAG00000019026	Cltb	Enhancers_Liver_22781
ENSFDAG00000014926	Higd2a	Enhancers_Liver_22781
ENSFDAG00000018858	Dbn1	Enhancers_Liver_22844
ENSFDAG00000020953	Pdlim7	Enhancers_Liver_22844
ENSFDAG00000019044	Pitx1	Enhancers_Liver_22856
ENSFDAG00000011765	Tifab	Enhancers_Liver_22863
ENSFDAG00000011800	Lect2	Enhancers_Liver_22899
ENSFDAG00000005844	Tgfbi	Enhancers_Liver_22899
ENSFDAG00000016244	Ntrk2	Enhancers_Liver_22991
ENSFDAG00000007066	Agtpbp1	Enhancers_Liver_22991
ENSFDAG00000018525	Max	Enhancers_Liver_23090
ENSFDAG00000015384	Fbp1	Enhancers_Liver_23090
ENSFDAG00000013230	Ptch1	Enhancers_Liver_23196
ENSFDAG00000000805	Ercc6l2	Enhancers_Liver_23196,Enhancers_Liver_23199
ENSFDAG00000010517	Hsd17b3	Enhancers_Liver_23199
ENSFDAG00000003894	1700001L19Rik	Enhancers_Liver_23273,Enhancers_Liver_23275
ENSFDAG00000006481	Adcy2	Enhancers_Liver_23273,Enhancers_Liver_23275
ENSFDAG00000016588	Med10	Enhancers_Liver_23313
ENSFDAG00000002837	Ice1	Enhancers_Liver_23313,Enhancers_Liver_23328
ENSFDAG00000008302	Adamts16	Enhancers_Liver_23328,Enhancers_Liver_23329
ENSFDAG00000019202	Pcsk1	Enhancers_Liver_23386
ENSFDAG00000007716	Cox7c	Enhancers_Liver_23595,Enhancers_Liver_23596
ENSFDAG00000017951	N.A	Enhancers_Liver_23595,Enhancers_Liver_23596
ENSFDAG00000018125	Arsb	Enhancers_Liver_23789,Enhancers_Liver_23791
ENSFDAG00000012313	Lhfpl2	Enhancers_Liver_23789,Enhancers_Liver_23791
ENSFDAG00000021110	F2r	Enhancers_Liver_23891,Enhancers_Liver_23896,Enhancers_Liver_23897,Enhancers_Liver_23906,Enhancers_Liver_23919,Enhancers_Liver_23921
ENSFDAG00000005533	Iqgap2	Enhancers_Liver_23891,Enhancers_Liver_23896,Enhancers_Liver_23897,Enhancers_Liver_23906,Enhancers_Liver_23919,Enhancers_Liver_23921,Enhancers_Liver_23958,Enhancers_Liver_23963
ENSFDAG00000012782	Sv2c	Enhancers_Liver_23958,Enhancers_Liver_23963
ENSFDAG00000008823	Hmgcr	Enhancers_Liver_24005
ENSFDAG00000011076	Enc1	Enhancers_Liver_24029
ENSFDAG00000014089	Arhgef28	Enhancers_Liver_24029
ENSFDAG00000013345	Tnpo1	Enhancers_Liver_24127
ENSFDAG00000008515	Zfp366	Enhancers_Liver_24138,Enhancers_Liver_24143,Enhancers_Liver_24153
ENSFDAG00000020440	H2bl1	Enhancers_Liver_24138,Enhancers_Liver_24143
ENSFDAG00000011101	Mrps27	Enhancers_Liver_24153
ENSFDAG00000002469	Glo1	Enhancers_Liver_24190
ENSFDAG00000016328	Dnah8	Enhancers_Liver_24190
ENSFDAG00000013245	Slc30a5	Enhancers_Liver_24238,Enhancers_Liver_24239,Enhancers_Liver_24253,Enhancers_Liver_24258,Enhancers_Liver_24259,Enhancers_Liver_24261,Enhancers_Liver_24265,Enhancers_Liver_24266,Enhancers_Liver_24267,Enhancers_Liver_24277
ENSFDAG00000008095	Pik3r1	Enhancers_Liver_24238,Enhancers_Liver_24239,Enhancers_Liver_24253,Enhancers_Liver_24258,Enhancers_Liver_24259,Enhancers_Liver_24261,Enhancers_Liver_24265,Enhancers_Liver_24266,Enhancers_Liver_24267,Enhancers_Liver_24277,Enhancers_Liver_24282,Enhancers_Liver_24315,Enhancers_Liver_24323,Enhancers_Liver_24338
ENSFDAG00000007382	N.A	Enhancers_Liver_24315,Enhancers_Liver_24323,Enhancers_Liver_24338
ENSFDAG00000016117	Ipo11	Enhancers_Liver_24481,Enhancers_Liver_24482,Enhancers_Liver_24484,Enhancers_Liver_56033
ENSFDAG00000003944	Tssk1	Enhancers_Liver_24481,Enhancers_Liver_24482,Enhancers_Liver_24484,Enhancers_Liver_56033
ENSFDAG00000020845	Gpbp1	Enhancers_Liver_24625
ENSFDAG00000015297	Plk2	Enhancers_Liver_24625
ENSFDAG00000018113	Map3k1	Enhancers_Liver_24648,Enhancers_Liver_24653,Enhancers_Liver_24656,Enhancers_Liver_24657
ENSFDAG00000007532	Ankrd55	Enhancers_Liver_24648,Enhancers_Liver_24653,Enhancers_Liver_24656,Enhancers_Liver_24657
ENSFDAG00000018963	Plpp1	Enhancers_Liver_24754
ENSFDAG00000011098	Slc38a9	Enhancers_Liver_24754
ENSFDAG00000008115	Esm1	Enhancers_Liver_24782
ENSFDAG00000019250	Cspg4b	Enhancers_Liver_24782
ENSFDAG00000016009	Hspb3	Enhancers_Liver_24807
ENSFDAG00000004664	Arl15	Enhancers_Liver_24807,Enhancers_Liver_24812,Enhancers_Liver_24816
ENSFDAG00000017757	Ndufs4	Enhancers_Liver_24812,Enhancers_Liver_24816
ENSFDAG00000001729	Mocs2	Enhancers_Liver_24861,Enhancers_Liver_24874
ENSFDAG00000007035	Itga2	Enhancers_Liver_24874,Enhancers_Liver_24889,Enhancers_Liver_24902
ENSFDAG00000002076	Pelo	Enhancers_Liver_24889,Enhancers_Liver_24902
ENSFDAG00000018251	Vwa8	Enhancers_Liver_28240
ENSFDAG00000001078	Abhd6	Enhancers_Liver_25027
ENSFDAG00000007562	N.A	Enhancers_Liver_25027
ENSFDAG00000006096	Rarb	Enhancers_Liver_25356
ENSFDAG00000014810	Thrb	Enhancers_Liver_25356,Enhancers_Liver_25390,Enhancers_Liver_25391
ENSFDAG00000005436	Ube2e2	Enhancers_Liver_25420
ENSFDAG00000006146	Ube2e1	Enhancers_Liver_25420
ENSFDAG00000011780	Nid2	Enhancers_Liver_25445
ENSFDAG00000020445	Rtraf	Enhancers_Liver_25445,Enhancers_Liver_25448
ENSFDAG00000013783	N.A	Enhancers_Liver_25780
ENSFDAG00000019362	Dlg5	Enhancers_Liver_25780
ENSFDAG00000011718	Zmiz1	Enhancers_Liver_25796,Enhancers_Liver_25797,Enhancers_Liver_25799,Enhancers_Liver_25801,Enhancers_Liver_25822,Enhancers_Liver_25824,Enhancers_Liver_25826,Enhancers_Liver_25839,Enhancers_Liver_25840,Enhancers_Liver_25841,Enhancers_Liver_25842,Enhancers_Liver_25883
ENSFDAG00000014880	Ppif	Enhancers_Liver_25883
ENSFDAG00000007741	Zcchc24	Enhancers_Liver_25920,Enhancers_Liver_25921,Enhancers_Liver_25926
ENSFDAG00000013251	Anxa11	Enhancers_Liver_25920,Enhancers_Liver_25921,Enhancers_Liver_25926
ENSFDAG00000015634	Arhgef3	Enhancers_Liver_25981,Enhancers_Liver_25986
ENSFDAG00000003424	Prkar2a	Enhancers_Liver_25981,Enhancers_Liver_25986,Enhancers_Liver_26004
ENSFDAG00000011124	Tasor	Enhancers_Liver_26004
ENSFDAG00000018321	Erc2	Enhancers_Liver_26011
ENSFDAG00000020716	Eif1	Enhancers_Liver_26011
ENSFDAG00000002978	N.A	Enhancers_Liver_26047,Enhancers_Liver_26048
ENSFDAG00000018707	Lrtm1	Enhancers_Liver_26047,Enhancers_Liver_26048
ENSFDAG00000015556	Prkcd	Enhancers_Liver_26135
ENSFDAG00000016477	Rft1	Enhancers_Liver_26135
ENSFDAG00000021364	Itih4	Enhancers_Liver_26175,Enhancers_Liver_26185
ENSFDAG00000015835	Itih3	Enhancers_Liver_26175,Enhancers_Liver_26185
ENSFDAG00000003319	Pbrm1	Enhancers_Liver_26206
ENSFDAG00000015739	Smim4	Enhancers_Liver_26206
ENSFDAG00000015321	Nt5dc2	Enhancers_Liver_26218
ENSFDAG00000003427	Stab1	Enhancers_Liver_26218
ENSFDAG00000010364	Capn7	Enhancers_Liver_26235
ENSFDAG00000003605	Sh3bp5	Enhancers_Liver_26235
ENSFDAG00000010444	Colq	Enhancers_Liver_26256
ENSFDAG00000016442	Eaf1	Enhancers_Liver_26256
ENSFDAG00000017865	Btd	Enhancers_Liver_26273
ENSFDAG00000005754	Ankrd28	Enhancers_Liver_26273,Enhancers_Liver_26288
ENSFDAG00000013965	Galnt15	Enhancers_Liver_26288
ENSFDAG00000017504	Oxnad1	Enhancers_Liver_38072,Enhancers_Liver_38073
ENSFDAG00000002171	Rftn1	Enhancers_Liver_38072,Enhancers_Liver_38073
ENSFDAG00000019023	Ncoa4	Enhancers_Liver_26315
ENSFDAG00000009566	Timm23	Enhancers_Liver_26315
ENSFDAG00000007617	Lrrc18	Enhancers_Liver_26362,Enhancers_Liver_26364,Enhancers_Liver_26365
ENSFDAG00000002180	Wdfy4	Enhancers_Liver_26362,Enhancers_Liver_26364,Enhancers_Liver_26365
ENSFDAG00000015389	Arhgap22	Enhancers_Liver_26370
ENSFDAG00000008659	Ptpn20	Enhancers_Liver_26393
ENSFDAG00000005173	Gdf10	Enhancers_Liver_26393
ENSFDAG00000010647	Glud1	Enhancers_Liver_26446
ENSFDAG00000020252	N.A	Enhancers_Liver_26446
ENSFDAG00000011903	Dele1	Enhancers_Liver_40922,Enhancers_Liver_40929,Enhancers_Liver_40930
ENSFDAG00000014130	Pcdh12	Enhancers_Liver_40929,Enhancers_Liver_40930
ENSFDAG00000018223	Ccser2	Enhancers_Liver_26506,Enhancers_Liver_26508
ENSFDAG00000004822	Rgr	Enhancers_Liver_26506,Enhancers_Liver_26508
ENSFDAG00000013430	Mat1a	Enhancers_Liver_26582,Enhancers_Liver_26583
ENSFDAG00000013315	Sftpa1	Enhancers_Liver_26582,Enhancers_Liver_26583
ENSFDAG00000006607	Fermt2	Enhancers_Liver_26656,Enhancers_Liver_26657,Enhancers_Liver_26658
ENSFDAG00000004086	Ero1a	Enhancers_Liver_26656
ENSFDAG00000007738	Ddhd1	Enhancers_Liver_26658
ENSFDAG00000009044	Bmp4	Enhancers_Liver_26722
ENSFDAG00000010113	Cdkn3	Enhancers_Liver_26722
ENSFDAG00000004836	Mapk1ip1l	Enhancers_Liver_26791
ENSFDAG00000007425	Socs4	Enhancers_Liver_26791
ENSFDAG00000007667	Otx2	Enhancers_Liver_26865
ENSFDAG00000013663	Nck1	Enhancers_Liver_26865
ENSFDAG00000019078	Trdc	Enhancers_Liver_26933,Enhancers_Liver_26935,Enhancers_Liver_26943
ENSFDAG00000012742	Thtpa	Enhancers_Liver_27007,Enhancers_Liver_27008
ENSFDAG00000020952	Zfhx2	Enhancers_Liver_27007,Enhancers_Liver_27008
ENSFDAG00000010297	Atg5	Enhancers_Liver_84436
ENSFDAG00000017065	Rcbtb1	Enhancers_Liver_27139
ENSFDAG00000016807	Phf11c	Enhancers_Liver_27139,Enhancers_Liver_27145
ENSFDAG00000017408	Setdb2	Enhancers_Liver_27145
ENSFDAG00000009366	Cab39l	Enhancers_Liver_27157,Enhancers_Liver_27158,Enhancers_Liver_27159
ENSFDAG00000017686	Cdadc1	Enhancers_Liver_27157,Enhancers_Liver_27158,Enhancers_Liver_27159
ENSFDAG00000021285	Ist1	Enhancers_Liver_27214
ENSFDAG00000011105	N.A	Enhancers_Liver_27214
ENSFDAG00000007235	Mipep	Enhancers_Liver_27249
ENSFDAG00000015078	Tmem30a	Enhancers_Liver_27249,Enhancers_Liver_27258
ENSFDAG00000005187	Tnfrsf19	Enhancers_Liver_27258,Enhancers_Liver_27259
ENSFDAG00000021227	Sacs	Enhancers_Liver_27259
ENSFDAG00000019831	Ebpl	Enhancers_Liver_27265
ENSFDAG00000000040	Arl11	Enhancers_Liver_27265
ENSFDAG00000018324	Ints6	Enhancers_Liver_27329,Enhancers_Liver_27337
ENSFDAG00000011464	Wdfy2	Enhancers_Liver_27329,Enhancers_Liver_27337
ENSFDAG00000005671	Gata4	Enhancers_Liver_27392
ENSFDAG00000019069	Blk	Enhancers_Liver_27392,Enhancers_Liver_27410
ENSFDAG00000021284	Pinx1	Enhancers_Liver_27435
ENSFDAG00000011992	Sox7	Enhancers_Liver_27435
ENSFDAG00000007827	Kif13b	Enhancers_Liver_27492,Enhancers_Liver_27509
ENSFDAG00000015770	Hmbox1	Enhancers_Liver_27492,Enhancers_Liver_27509
ENSFDAG00000018285	Chrna2	Enhancers_Liver_27639
ENSFDAG00000003680	Ptk2b	Enhancers_Liver_27639
ENSFDAG00000011423	Adra1a	Enhancers_Liver_27686
ENSFDAG00000001091	Dpysl2	Enhancers_Liver_27686
ENSFDAG00000002003	Sorbs3	Enhancers_Liver_27803
ENSFDAG00000011549	Ppp3cc	Enhancers_Liver_27803
ENSFDAG00000000848	Phyhip	Enhancers_Liver_27835,Enhancers_Liver_27836
ENSFDAG00000017022	Bmp1	Enhancers_Liver_27835,Enhancers_Liver_27836,Enhancers_Liver_27837
ENSFDAG00000016294	Nudt18	Enhancers_Liver_27842
ENSFDAG00000018971	Gfra2	Enhancers_Liver_27892,Enhancers_Liver_27912,Enhancers_Liver_27913
ENSFDAG00000014108	Lzts1	Enhancers_Liver_27912,Enhancers_Liver_27913,Enhancers_Liver_81133
ENSFDAG00000009086	Esd	Enhancers_Liver_28020,Enhancers_Liver_28024,Enhancers_Liver_28025
ENSFDAG00000012768	Lrch1	Enhancers_Liver_28020,Enhancers_Liver_28024,Enhancers_Liver_28025,Enhancers_Liver_28042
ENSFDAG00000013383	Rubcnl	Enhancers_Liver_28042,Enhancers_Liver_28055
ENSFDAG00000016112	Lcp1	Enhancers_Liver_28055,Enhancers_Liver_28060
ENSFDAG00000002539	N.A	Enhancers_Liver_28060
ENSFDAG00000008673	Gpalpp1	Enhancers_Liver_28127
ENSFDAG00000008835	Tsc22d1	Enhancers_Liver_28127,Enhancers_Liver_28136
ENSFDAG00000013099	N.A	Enhancers_Liver_28136,Enhancers_Liver_28142,Enhancers_Liver_28186
ENSFDAG00000010703	Lacc1	Enhancers_Liver_28142,Enhancers_Liver_28186
ENSFDAG00000001313	Rgcc	Enhancers_Liver_28240
ENSFDAG00000004922	Klf12	Enhancers_Liver_28459,Enhancers_Liver_28488
ENSFDAG00000018430	Tbc1d4	Enhancers_Liver_28488
ENSFDAG00000017731	Lmo7	Enhancers_Liver_28510
ENSFDAG00000008161	N.A	Enhancers_Liver_28510,Enhancers_Liver_28516,Enhancers_Liver_28519
ENSFDAG00000018712	Acod1	Enhancers_Liver_28516,Enhancers_Liver_28519
ENSFDAG00000010055	Cln5	Enhancers_Liver_28526
ENSFDAG00000013567	Fbxl3	Enhancers_Liver_28526,Enhancers_Liver_28533
ENSFDAG00000014724	Mycbp2	Enhancers_Liver_28533,Enhancers_Liver_28537,Enhancers_Liver_28538,Enhancers_Liver_28539
ENSFDAG00000004883	Scel	Enhancers_Liver_28537,Enhancers_Liver_28538,Enhancers_Liver_28539
ENSFDAG00000018200	Gm7324	Enhancers_Liver_28545,Enhancers_Liver_28546
ENSFDAG00000014032	Ednrb	Enhancers_Liver_28545,Enhancers_Liver_28546,Enhancers_Liver_28551
ENSFDAG00000010700	Pou4f1	Enhancers_Liver_28551
ENSFDAG00000006553	Nxt1	Enhancers_Liver_28609
ENSFDAG00000013774	Gpc5	Enhancers_Liver_28609,Enhancers_Liver_28615
ENSFDAG00000006025	Farp1	Enhancers_Liver_28796
ENSFDAG00000018390	N.A	Enhancers_Liver_28796
ENSFDAG00000012370	Slc15a1	Enhancers_Liver_28827
ENSFDAG00000003230	Dock9	Enhancers_Liver_28827
ENSFDAG00000003119	Ptger4	Enhancers_Liver_29019
ENSFDAG00000008399	Ttc33	Enhancers_Liver_29019
ENSFDAG00000021228	C9	Enhancers_Liver_29060,Enhancers_Liver_29068
ENSFDAG00000008160	Fyb	Enhancers_Liver_29060,Enhancers_Liver_29068,Enhancers_Liver_29073
ENSFDAG00000013319	Osmr	Enhancers_Liver_29091,Enhancers_Liver_29104,Enhancers_Liver_29118
ENSFDAG00000014081	Lifr	Enhancers_Liver_29091,Enhancers_Liver_29104,Enhancers_Liver_29118
ENSFDAG00000016486	Gdnf	Enhancers_Liver_29176
ENSFDAG00000021476	Wdr70	Enhancers_Liver_29176
ENSFDAG00000006649	Cplane1	Enhancers_Liver_29178
ENSFDAG00000004787	Nup155	Enhancers_Liver_29178
ENSFDAG00000015306	Prlr	Enhancers_Liver_29221,Enhancers_Liver_29236,Enhancers_Liver_29243
ENSFDAG00000009878	Agxt2	Enhancers_Liver_29221,Enhancers_Liver_29236,Enhancers_Liver_29243
ENSFDAG00000008611	Rai14	Enhancers_Liver_29284,Enhancers_Liver_29310
ENSFDAG00000007198	N.A	Enhancers_Liver_29284
ENSFDAG00000000130	C1qtnf3	Enhancers_Liver_29310,Enhancers_Liver_29327
ENSFDAG00000001828	Amacr	Enhancers_Liver_29327
ENSFDAG00000006503	Basp1	Enhancers_Liver_29503
ENSFDAG00000014492	Myo10	Enhancers_Liver_29503
ENSFDAG00000005751	Retreg1	Enhancers_Liver_29540
ENSFDAG00000011699	Zfp622	Enhancers_Liver_29540
ENSFDAG00000013091	Otulinl	Enhancers_Liver_29620,Enhancers_Liver_29629,Enhancers_Liver_29631
ENSFDAG00000008859	Trio	Enhancers_Liver_29629,Enhancers_Liver_29631,Enhancers_Liver_29664
ENSFDAG00000012600	Dnah5	Enhancers_Liver_29664
ENSFDAG00000016950	Dap	Enhancers_Liver_29705
ENSFDAG00000005999	Ropn1l	Enhancers_Liver_29705,Enhancers_Liver_29719
ENSFDAG00000010088	Marchf6	Enhancers_Liver_29719
ENSFDAG00000014744	Atpsckmt	Enhancers_Liver_29728
ENSFDAG00000018006	Nipal2	Enhancers_Liver_29849
ENSFDAG00000017068	Pop1	Enhancers_Liver_29849
ENSFDAG00000015031	Cox6c	Enhancers_Liver_29873
ENSFDAG00000007917	Vps13b	Enhancers_Liver_29873
ENSFDAG00000006667	Rnf19a	Enhancers_Liver_29881,Enhancers_Liver_29890,Enhancers_Liver_29891,Enhancers_Liver_29892,Enhancers_Liver_29902,Enhancers_Liver_29903
ENSFDAG00000018246	Ankrd46	Enhancers_Liver_29881,Enhancers_Liver_29890,Enhancers_Liver_29891,Enhancers_Liver_29892,Enhancers_Liver_29902,Enhancers_Liver_29903
ENSFDAG00000005583	N.A	Enhancers_Liver_29919
ENSFDAG00000016143	Snx31	Enhancers_Liver_29919
ENSFDAG00000014817	Ncald	Enhancers_Liver_29972
ENSFDAG00000009862	Grhl2	Enhancers_Liver_29972,Enhancers_Liver_30436
ENSFDAG00000012104	Trps1	Enhancers_Liver_30189
ENSFDAG00000011110	N.A	Enhancers_Liver_30189,Enhancers_Liver_30210
ENSFDAG00000018431	Eif3h	Enhancers_Liver_30210
ENSFDAG00000012115	Colec10	Enhancers_Liver_30331
ENSFDAG00000014750	Mal2	Enhancers_Liver_30331,Enhancers_Liver_30338
ENSFDAG00000005989	Ccn3	Enhancers_Liver_30338
ENSFDAG00000016931	Enpp2	Enhancers_Liver_30358
ENSFDAG00000013946	Mtbp	Enhancers_Liver_30396
ENSFDAG00000021254	Col14a1	Enhancers_Liver_30396
ENSFDAG00000007034	Sntb1	Enhancers_Liver_30424,Enhancers_Liver_30436
ENSFDAG00000019003	Zhx2	Enhancers_Liver_30499,Enhancers_Liver_30509
ENSFDAG00000015207	Derl1	Enhancers_Liver_30499,Enhancers_Liver_30509
ENSFDAG00000020325	Rnf139	Enhancers_Liver_30583
ENSFDAG00000006848	Trib1	Enhancers_Liver_30671,Enhancers_Liver_30672,Enhancers_Liver_30683,Enhancers_Liver_30692,Enhancers_Liver_30709,Enhancers_Liver_30720
ENSFDAG00000019184	Nsmce2	Enhancers_Liver_30671,Enhancers_Liver_30672,Enhancers_Liver_30683
ENSFDAG00000017112	Lratd2	Enhancers_Liver_30692,Enhancers_Liver_30709,Enhancers_Liver_30720,Enhancers_Liver_30787
ENSFDAG00000004839	Myc	Enhancers_Liver_30798,Enhancers_Liver_30859
ENSFDAG00000015327	N.A	Enhancers_Liver_30798,Enhancers_Liver_30859
ENSFDAG00000010798	Cyrib	Enhancers_Liver_30926
ENSFDAG00000011773	Asap1	Enhancers_Liver_30980
ENSFDAG00000012391	Adcy8	Enhancers_Liver_30980
ENSFDAG00000004232	N.A	Enhancers_Liver_49142
ENSFDAG00000014262	Trappc9	Enhancers_Liver_90507
ENSFDAG00000016817	Chrac1	Enhancers_Liver_90507
ENSFDAG00000020995	Slc45a4	Enhancers_Liver_31238,Enhancers_Liver_31241
ENSFDAG00000014309	Ptp4a3	Enhancers_Liver_31238,Enhancers_Liver_31241
ENSFDAG00000021030	Arc	Enhancers_Liver_31281
ENSFDAG00000020044	Psca	Enhancers_Liver_31281
ENSFDAG00000016929	Myh9	Enhancers_Liver_31497,Enhancers_Liver_31512,Enhancers_Liver_31513,Enhancers_Liver_31514
ENSFDAG00000012971	Txn2	Enhancers_Liver_31512,Enhancers_Liver_31513,Enhancers_Liver_31514
ENSFDAG00000019144	C1qtnf6	Enhancers_Liver_31574
ENSFDAG00000016639	Il2rb	Enhancers_Liver_31574
ENSFDAG00000010926	Sstr3	Enhancers_Liver_31579
ENSFDAG00000013640	Gcat	Enhancers_Liver_31631
ENSFDAG00000009565	Galr2	Enhancers_Liver_31630
ENSFDAG00000009706	Exoc7	Enhancers_Liver_31630
ENSFDAG00000009130	Ankrd54	Enhancers_Liver_31631
ENSFDAG00000019181	Tmem184b	Enhancers_Liver_31665
ENSFDAG00000021101	Csnk1e	Enhancers_Liver_31665
ENSFDAG00000006165	Fam83f	Enhancers_Liver_31727
ENSFDAG00000002610	Grap2	Enhancers_Liver_31727
ENSFDAG00000009159	Mchr1	Enhancers_Liver_31790
ENSFDAG00000021248	Slc25a17	Enhancers_Liver_31790
ENSFDAG00000015723	Ccdc134	Enhancers_Liver_31868
ENSFDAG00000013377	Srebf2	Enhancers_Liver_31868
ENSFDAG00000014148	Wbp2nl	Enhancers_Liver_31879
ENSFDAG00000018091	Ttll1	Enhancers_Liver_31975
ENSFDAG00000013545	Mcat	Enhancers_Liver_31975
ENSFDAG00000005433	Atxn10	Enhancers_Liver_32084
ENSFDAG00000006258	Wnt7b	Enhancers_Liver_32084,Enhancers_Liver_32116,Enhancers_Liver_32117,Enhancers_Liver_32119
ENSFDAG00000010325	Ppara	Enhancers_Liver_32116,Enhancers_Liver_32117,Enhancers_Liver_32119,Enhancers_Liver_32125
ENSFDAG00000019666	Cdpf1	Enhancers_Liver_32125
ENSFDAG00000010893	Pim3	Enhancers_Liver_32225
ENSFDAG00000013002	Creld2	Enhancers_Liver_32225
ENSFDAG00000008862	Selenoo	Enhancers_Liver_32240
ENSFDAG00000005024	Arsa	Enhancers_Liver_32263
ENSFDAG00000012328	Shank3	Enhancers_Liver_32264
ENSFDAG00000020339	Prickle1	Enhancers_Liver_32329
ENSFDAG00000007646	Adamts20	Enhancers_Liver_32329
ENSFDAG00000018503	Twf1	Enhancers_Liver_51356
ENSFDAG00000021455	Ano6	Enhancers_Liver_32347
ENSFDAG00000000334	Arid2	Enhancers_Liver_32347
ENSFDAG00000000942	Slc38a1	Enhancers_Liver_32399
ENSFDAG00000011618	Slc38a2	Enhancers_Liver_32399,Enhancers_Liver_32419
ENSFDAG00000008153	N.A	Enhancers_Liver_32419,Enhancers_Liver_32444,Enhancers_Liver_32447,Enhancers_Liver_32453,Enhancers_Liver_32465,Enhancers_Liver_32466
ENSFDAG00000009679	Amigo2	Enhancers_Liver_32447,Enhancers_Liver_32453,Enhancers_Liver_32465,Enhancers_Liver_32466
ENSFDAG00000015213	Itm2b	Enhancers_Liver_32494
ENSFDAG00000016435	Rpap3	Enhancers_Liver_32494
ENSFDAG00000001680	Rapgef3	Enhancers_Liver_32503
ENSFDAG00000019166	Endou	Enhancers_Liver_32503
ENSFDAG00000009326	Vdr	Enhancers_Liver_32514
ENSFDAG00000020943	Hdac7	Enhancers_Liver_32514
ENSFDAG00000016883	Prpf40b	Enhancers_Liver_32592
ENSFDAG00000012153	Fmnl3	Enhancers_Liver_32592
ENSFDAG00000006406	N.A	Enhancers_Liver_32652
ENSFDAG00000017788	N.A	Enhancers_Liver_32652
ENSFDAG00000009734	Dazap2	Enhancers_Liver_32690
ENSFDAG00000000381	Smagp	Enhancers_Liver_32690,Enhancers_Liver_32695,Enhancers_Liver_32698
ENSFDAG00000013314	Bin2	Enhancers_Liver_32695,Enhancers_Liver_32698
ENSFDAG00000016585	Ankrd33	Enhancers_Liver_32721
ENSFDAG00000006275	Tamalin	Enhancers_Liver_32741
ENSFDAG00000018233	Nr4a1	Enhancers_Liver_32741,Enhancers_Liver_32744,Enhancers_Liver_32746
ENSFDAG00000017982	Atg101	Enhancers_Liver_32746
ENSFDAG00000014905	Itgb7	Enhancers_Liver_32810
ENSFDAG00000019364	Rarg	Enhancers_Liver_32810
ENSFDAG00000016719	Mfsd5	Enhancers_Liver_32818
ENSFDAG00000020870	Espl1	Enhancers_Liver_32818
ENSFDAG00000009187	N.A	Enhancers_Liver_32839
ENSFDAG00000013374	Gm28047	Enhancers_Liver_32839
ENSFDAG00000010738	N.A	Enhancers_Liver_32879
ENSFDAG00000002958	Zfp385a	Enhancers_Liver_32879
ENSFDAG00000005108	Nlrc3	Enhancers_Liver_32910
ENSFDAG00000010804	Slx4	Enhancers_Liver_32910
ENSFDAG00000011996	Ppl	Enhancers_Liver_33022
ENSFDAG00000008324	Sec14l5	Enhancers_Liver_33022
ENSFDAG00000007388	Rbfox1	Enhancers_Liver_33044
ENSFDAG00000007398	Skil	Enhancers_Liver_87499
ENSFDAG00000021288	Cldn11	Enhancers_Liver_87499
ENSFDAG00000012269	Ciita	Enhancers_Liver_33143
ENSFDAG00000010818	Clec16a	Enhancers_Liver_33163
ENSFDAG00000012803	Socs1	Enhancers_Liver_33163
ENSFDAG00000008312	Tnfrsf17	Enhancers_Liver_33249,Enhancers_Liver_33250
ENSFDAG00000005870	Snx29	Enhancers_Liver_33249,Enhancers_Liver_33250,Enhancers_Liver_33266
ENSFDAG00000011127	Cpped1	Enhancers_Liver_33266
ENSFDAG00000013105	Ercc4	Enhancers_Liver_33298,Enhancers_Liver_33306
ENSFDAG00000009819	Mrtfb	Enhancers_Liver_33298,Enhancers_Liver_33306,Enhancers_Liver_33316
ENSFDAG00000009234	Parn	Enhancers_Liver_33316
ENSFDAG00000011875	Ppm1f	Enhancers_Liver_33454
ENSFDAG00000008676	Mapk1	Enhancers_Liver_33454
ENSFDAG00000019610	B3gnt5	Enhancers_Liver_33552
ENSFDAG00000001427	Osbpl11	Enhancers_Liver_34366,Enhancers_Liver_34367
ENSFDAG00000010946	N.A	Enhancers_Liver_33552,Enhancers_Liver_33557
ENSFDAG00000016787	Psmd2	Enhancers_Liver_33587
ENSFDAG00000005730	Ece2	Enhancers_Liver_33587
ENSFDAG00000009294	Vps8	Enhancers_Liver_33616,Enhancers_Liver_33627
ENSFDAG00000015018	2510009E07Rik	Enhancers_Liver_33616,Enhancers_Liver_33627
ENSFDAG00000015039	Igf2bp2	Enhancers_Liver_33654
ENSFDAG00000007825	Liph	Enhancers_Liver_33654
ENSFDAG00000015155	Etv5	Enhancers_Liver_33669
ENSFDAG00000000661	Dgkg	Enhancers_Liver_33669
ENSFDAG00000008432	Xxylt1	Enhancers_Liver_34144,Enhancers_Liver_34147,Enhancers_Liver_34151,Enhancers_Liver_34152,Enhancers_Liver_34187,Enhancers_Liver_34198
ENSFDAG00000017373	Lsg1	Enhancers_Liver_34144,Enhancers_Liver_34147,Enhancers_Liver_34151,Enhancers_Liver_34152,Enhancers_Liver_34187,Enhancers_Liver_34198
ENSFDAG00000018685	Bdh1	Enhancers_Liver_34247,Enhancers_Liver_34262
ENSFDAG00000007182	Dlg1	Enhancers_Liver_34247,Enhancers_Liver_34262
ENSFDAG00000000515	Pfdn4	Enhancers_Liver_34289
ENSFDAG00000017326	Tm4sf19	Enhancers_Liver_34302
ENSFDAG00000008838	Rnf168	Enhancers_Liver_34302
ENSFDAG00000018191	Pcyt1a	Enhancers_Liver_34311
ENSFDAG00000008779	Slc51a	Enhancers_Liver_34311
ENSFDAG00000018630	Tnk2	Enhancers_Liver_34334
ENSFDAG00000006606	Muc20	Enhancers_Liver_34334
ENSFDAG00000020105	N.A	Enhancers_Liver_34366,Enhancers_Liver_34367
ENSFDAG00000015492	Ildr1	Enhancers_Liver_34632,Enhancers_Liver_34633
ENSFDAG00000020673	Slc15a2	Enhancers_Liver_34632,Enhancers_Liver_34633
ENSFDAG00000014643	Hcls1	Enhancers_Liver_34643
ENSFDAG00000021195	Fbxo40	Enhancers_Liver_34643
ENSFDAG00000017698	Stxbp5l	Enhancers_Liver_34649
ENSFDAG00000006643	Gtf2e1	Enhancers_Liver_34649
ENSFDAG00000020763	Hgd	Enhancers_Liver_34666
ENSFDAG00000005950	Pdcd10	Enhancers_Liver_34666
ENSFDAG00000016692	Fstl1	Enhancers_Liver_34693,Enhancers_Liver_34694
ENSFDAG00000004823	Gm36028	Enhancers_Liver_34694
ENSFDAG00000016399	Lrrc58	Enhancers_Liver_34709
ENSFDAG00000005360	Gpr156	Enhancers_Liver_34709,Enhancers_Liver_34713
ENSFDAG00000019517	Gsk3b	Enhancers_Liver_34713,Enhancers_Liver_34732
ENSFDAG00000008368	Nr1i2	Enhancers_Liver_34732
ENSFDAG00000007432	Tmem39a	Enhancers_Liver_34764
ENSFDAG00000010940	Arhgap31	Enhancers_Liver_34764,Enhancers_Liver_34772
ENSFDAG00000012999	Upk1b	Enhancers_Liver_34783
ENSFDAG00000018887	Igsf11	Enhancers_Liver_34783
ENSFDAG00000020840	Myo5b	Enhancers_Liver_42615
ENSFDAG00000014997	Slc35a5	Enhancers_Liver_44343
ENSFDAG00000002448	Uhrf2	Enhancers_Liver_44343
ENSFDAG00000012830	St14	Enhancers_Liver_84598
ENSFDAG00000013585	Cblb	Enhancers_Liver_35125
ENSFDAG00000020807	Alcam	Enhancers_Liver_35125
ENSFDAG00000004229	Zpld1	Enhancers_Liver_35182,Enhancers_Liver_35193,Enhancers_Liver_35198,Enhancers_Liver_35199
ENSFDAG00000017934	Nfkbiz	Enhancers_Liver_35182,Enhancers_Liver_35193,Enhancers_Liver_35198,Enhancers_Liver_35199
ENSFDAG00000017042	Abi3bp	Enhancers_Liver_35208,Enhancers_Liver_35209,Enhancers_Liver_35218,Enhancers_Liver_35219
ENSFDAG00000013479	Tfg	Enhancers_Liver_35208,Enhancers_Liver_35209,Enhancers_Liver_35218,Enhancers_Liver_35219
ENSFDAG00000012577	Cmss1	Enhancers_Liver_35240
ENSFDAG00000010001	Pomp	Enhancers_Liver_35240
ENSFDAG00000010951	Epha3	Enhancers_Liver_35341
ENSFDAG00000014277	Pros1	Enhancers_Liver_35341
ENSFDAG00000007990	Robo1	Enhancers_Liver_35410,Enhancers_Liver_35414,Enhancers_Liver_35438
ENSFDAG00000013121	Usp25	Enhancers_Liver_35523,Enhancers_Liver_35526,Enhancers_Liver_35531,Enhancers_Liver_35534,Enhancers_Liver_35535,Enhancers_Liver_35536
ENSFDAG00000018831	N.A	Enhancers_Liver_35523,Enhancers_Liver_35526,Enhancers_Liver_35531,Enhancers_Liver_35534,Enhancers_Liver_35535,Enhancers_Liver_35536,Enhancers_Liver_35557,Enhancers_Liver_35558
ENSFDAG00000017977	Cxadr	Enhancers_Liver_35557,Enhancers_Liver_35558
ENSFDAG00000006369	Mrpl39	Enhancers_Liver_35594,Enhancers_Liver_35596
ENSFDAG00000011899	Jam2	Enhancers_Liver_35596,Enhancers_Liver_35599,Enhancers_Liver_35600
ENSFDAG00000015576	Atp5j	Enhancers_Liver_35599,Enhancers_Liver_35600
ENSFDAG00000018450	App	Enhancers_Liver_35648,Enhancers_Liver_35652
ENSFDAG00000017820	Cyyr1	Enhancers_Liver_35648,Enhancers_Liver_35652
ENSFDAG00000012916	N6amt1	Enhancers_Liver_35689,Enhancers_Liver_35705,Enhancers_Liver_35724
ENSFDAG00000000365	N.A	Enhancers_Liver_35742,Enhancers_Liver_35744
ENSFDAG00000006385	Bach1	Enhancers_Liver_35742,Enhancers_Liver_35744
ENSFDAG00000009166	N.A	Enhancers_Liver_35859
ENSFDAG00000011872	Gm21970	Enhancers_Liver_35859,Enhancers_Liver_35866,Enhancers_Liver_35868,Enhancers_Liver_35869,Enhancers_Liver_35870
ENSFDAG00000001203	Ifnar1	Enhancers_Liver_35866,Enhancers_Liver_35868,Enhancers_Liver_35869,Enhancers_Liver_35870
ENSFDAG00000017284	Cryzl1	Enhancers_Liver_35933,Enhancers_Liver_35942,Enhancers_Liver_35943
ENSFDAG00000017095	Atp5o	Enhancers_Liver_35933,Enhancers_Liver_35942,Enhancers_Liver_35943
ENSFDAG00000005921	Clic6	Enhancers_Liver_36005,Enhancers_Liver_36006
ENSFDAG00000012280	Runx1	Enhancers_Liver_36005,Enhancers_Liver_36006
ENSFDAG00000016002	Gdap2	Enhancers_Liver_36052
ENSFDAG00000009098	Morc3	Enhancers_Liver_36052
ENSFDAG00000017824	Ttc3	Enhancers_Liver_36084
ENSFDAG00000005712	Vps26c	Enhancers_Liver_36098
ENSFDAG00000013789	Dyrk1a	Enhancers_Liver_36098,Enhancers_Liver_36107,Enhancers_Liver_36113
ENSFDAG00000008558	Kcnj6	Enhancers_Liver_36107,Enhancers_Liver_36113
ENSFDAG00000008873	Ets2	Enhancers_Liver_36215
ENSFDAG00000019778	Psmg1	Enhancers_Liver_36215,Enhancers_Liver_36222,Enhancers_Liver_36223
ENSFDAG00000003710	Brwd1	Enhancers_Liver_36222,Enhancers_Liver_36223
ENSFDAG00000018098	Srd5a2	Enhancers_Liver_38762,Enhancers_Liver_38764,Enhancers_Liver_38765
ENSFDAG00000015516	Nox3	Enhancers_Liver_36319
ENSFDAG00000015740	Arid1b	Enhancers_Liver_36319,Enhancers_Liver_36361,Enhancers_Liver_36380,Enhancers_Liver_36381
ENSFDAG00000005860	Tmem242	Enhancers_Liver_36361,Enhancers_Liver_36380,Enhancers_Liver_36381
ENSFDAG00000005611	Zdhhc14	Enhancers_Liver_36397,Enhancers_Liver_36398,Enhancers_Liver_36420
ENSFDAG00000019452	Snx9	Enhancers_Liver_36397,Enhancers_Liver_36398,Enhancers_Liver_36420
ENSFDAG00000011738	Mpc1	Enhancers_Liver_36487
ENSFDAG00000016105	Rps6ka2	Enhancers_Liver_36487
ENSFDAG00000010065	T	Enhancers_Liver_36536
ENSFDAG00000007490	Pde10a	Enhancers_Liver_36536
ENSFDAG00000006081	Qki	Enhancers_Liver_36568,Enhancers_Liver_36579,Enhancers_Liver_36584,Enhancers_Liver_36586
ENSFDAG00000011666	Pacrg	Enhancers_Liver_36568,Enhancers_Liver_36579,Enhancers_Liver_36584,Enhancers_Liver_36586
ENSFDAG00000021117	Slc22a3	Enhancers_Liver_36630
ENSFDAG00000005983	Slc22a2	Enhancers_Liver_36630
ENSFDAG00000003636	Slc22a1	Enhancers_Liver_36650
ENSFDAG00000003077	Igf2r	Enhancers_Liver_36650
ENSFDAG00000017270	Afdn	Enhancers_Liver_36705,Enhancers_Liver_36720,Enhancers_Liver_36723
ENSFDAG00000019773	N.A	Enhancers_Liver_36705,Enhancers_Liver_36720,Enhancers_Liver_36723
ENSFDAG00000007930	Gm3435	Enhancers_Liver_36750
ENSFDAG00000014165	Dll1	Enhancers_Liver_36750
ENSFDAG00000019046	Casp16	Enhancers_Liver_36806
ENSFDAG00000008783	Atp6v0c	Enhancers_Liver_36836
ENSFDAG00000012316	Tbc1d24	Enhancers_Liver_36836
ENSFDAG00000008987	Capn15	Enhancers_Liver_36960
ENSFDAG00000001674	Rab11fip3	Enhancers_Liver_36960
ENSFDAG00000008576	Dusp1	Enhancers_Liver_37019
ENSFDAG00000019143	Ergic1	Enhancers_Liver_37019
ENSFDAG00000017892	Atp6v0e	Enhancers_Liver_37052
ENSFDAG00000016267	Crebrf	Enhancers_Liver_37052,Enhancers_Liver_37059,Enhancers_Liver_37060
ENSFDAG00000015309	Bnip1	Enhancers_Liver_37059,Enhancers_Liver_37060
ENSFDAG00000019647	Gm50253	Enhancers_Liver_37067
ENSFDAG00000009551	Bak1	Enhancers_Liver_37067
ENSFDAG00000000306	N.A	Enhancers_Liver_37232
ENSFDAG00000013195	Mtch1	Enhancers_Liver_37232
ENSFDAG00000017817	Zfand3	Enhancers_Liver_37296,Enhancers_Liver_37304
ENSFDAG00000017992	Btbd9	Enhancers_Liver_37296,Enhancers_Liver_37304
ENSFDAG00000014722	Slc37a1	Enhancers_Liver_37361
ENSFDAG00000005316	Pde9a	Enhancers_Liver_37361
ENSFDAG00000003931	Rgl2	Enhancers_Liver_37502
ENSFDAG00000005098	Pfdn6	Enhancers_Liver_37502
ENSFDAG00000001345	H2-DMb2	Enhancers_Liver_37508
ENSFDAG00000015337	H2-Ob	Enhancers_Liver_37514
ENSFDAG00000014024	N.A	Enhancers_Liver_37514
ENSFDAG00000018057	H2-Aa	Enhancers_Liver_37517
ENSFDAG00000006994	Lta	Enhancers_Liver_37587
ENSFDAG00000005972	Atp6v1g2	Enhancers_Liver_37587
ENSFDAG00000014597	Ogt	Enhancers_Liver_37590,Enhancers_Liver_90170
ENSFDAG00000005997	Cxcr3	Enhancers_Liver_37590
ENSFDAG00000013987	Bckdhb	Enhancers_Liver_87284,Enhancers_Liver_87286
ENSFDAG00000018551	Rcan2	Enhancers_Liver_37727
ENSFDAG00000006575	Enpp5	Enhancers_Liver_37727,Enhancers_Liver_37735
ENSFDAG00000002119	Enpp4	Enhancers_Liver_37735,Enhancers_Liver_37737
ENSFDAG00000011173	Clic5	Enhancers_Liver_37737,Enhancers_Liver_37748
ENSFDAG00000015340	Supt3	Enhancers_Liver_37748
ENSFDAG00000002748	Vegfa	Enhancers_Liver_37809
ENSFDAG00000011684	Mrpl14	Enhancers_Liver_37809
ENSFDAG00000016971	Pgc	Enhancers_Liver_37973
ENSFDAG00000009674	Tfeb	Enhancers_Liver_37973
ENSFDAG00000009929	Daam2	Enhancers_Liver_38015,Enhancers_Liver_38016
ENSFDAG00000020773	Mocs1	Enhancers_Liver_38015,Enhancers_Liver_38016
ENSFDAG00000018222	Plcl2	Enhancers_Liver_38120
ENSFDAG00000006956	Tbc1d5	Enhancers_Liver_38120
ENSFDAG00000007287	Plin3	Enhancers_Liver_38208
ENSFDAG00000011547	Fem1al	Enhancers_Liver_38208
ENSFDAG00000020009	Safb2	Enhancers_Liver_38217
ENSFDAG00000018476	Ptprs	Enhancers_Liver_38217
ENSFDAG00000011449	Tnfsf14	Enhancers_Liver_38234
ENSFDAG00000003807	C3	Enhancers_Liver_38234
ENSFDAG00000012942	Efna5	Enhancers_Liver_38290,Enhancers_Liver_38291
ENSFDAG00000015291	Rab12	Enhancers_Liver_38483
ENSFDAG00000011352	Ptprm	Enhancers_Liver_38483
ENSFDAG00000021520	Il18bp	Enhancers_Liver_77345
ENSFDAG00000007377	Lbh	Enhancers_Liver_38663,Enhancers_Liver_38664,Enhancers_Liver_38667
ENSFDAG00000011846	Lclat1	Enhancers_Liver_38663,Enhancers_Liver_38664,Enhancers_Liver_38667,Enhancers_Liver_38690
ENSFDAG00000018559	Capn13	Enhancers_Liver_38690
ENSFDAG00000017192	Galnt14	Enhancers_Liver_38702,Enhancers_Liver_38719
ENSFDAG00000017946	Ehd3	Enhancers_Liver_38719,Enhancers_Liver_38741,Enhancers_Liver_38755
ENSFDAG00000008313	Xdh	Enhancers_Liver_38741,Enhancers_Liver_38755,Enhancers_Liver_38762,Enhancers_Liver_38764,Enhancers_Liver_38765
ENSFDAG00000007193	Crim1	Enhancers_Liver_38857,Enhancers_Liver_38879
ENSFDAG00000007141	Fez2	Enhancers_Liver_38857,Enhancers_Liver_38879
ENSFDAG00000016897	Vit	Enhancers_Liver_38914
ENSFDAG00000003988	Strn	Enhancers_Liver_38914,Enhancers_Liver_38918,Enhancers_Liver_38921
ENSFDAG00000001096	Gpatch11	Enhancers_Liver_38918,Enhancers_Liver_38921
ENSFDAG00000010373	Map4k3	Enhancers_Liver_39074
ENSFDAG00000016462	Tmem178	Enhancers_Liver_39074
ENSFDAG00000012158	1700009N14Rik	Enhancers_Liver_39150,Enhancers_Liver_39154
ENSFDAG00000014346	Pkdcc	Enhancers_Liver_39150,Enhancers_Liver_39154
ENSFDAG00000000296	Mta3	Enhancers_Liver_39201,Enhancers_Liver_39207
ENSFDAG00000015467	Haao	Enhancers_Liver_39201,Enhancers_Liver_39207,Enhancers_Liver_39215,Enhancers_Liver_39297,Enhancers_Liver_39319,Enhancers_Liver_39324,Enhancers_Liver_39327,Enhancers_Liver_39339
ENSFDAG00000017481	Dync2li1	Enhancers_Liver_39374,Enhancers_Liver_39375,Enhancers_Liver_39376
ENSFDAG00000007465	Abcg8	Enhancers_Liver_39374,Enhancers_Liver_39375,Enhancers_Liver_39376
ENSFDAG00000006006	Abcg5	Enhancers_Liver_39388
ENSFDAG00000015328	Lrpprc	Enhancers_Liver_39388
ENSFDAG00000013524	Prkce	Enhancers_Liver_39434,Enhancers_Liver_39435,Enhancers_Liver_39459,Enhancers_Liver_39460,Enhancers_Liver_39462,Enhancers_Liver_39468,Enhancers_Liver_39473,Enhancers_Liver_39480,Enhancers_Liver_39511,Enhancers_Liver_39514
ENSFDAG00000019389	Epas1	Enhancers_Liver_39434,Enhancers_Liver_39435,Enhancers_Liver_39459,Enhancers_Liver_39460,Enhancers_Liver_39462,Enhancers_Liver_39468,Enhancers_Liver_39473,Enhancers_Liver_39480,Enhancers_Liver_39511,Enhancers_Liver_39514
ENSFDAG00000017622	Calm2	Enhancers_Liver_39657
ENSFDAG00000011539	N.A	Enhancers_Liver_39657
ENSFDAG00000012845	N.A	Enhancers_Liver_39734
ENSFDAG00000016782	Yes1	Enhancers_Liver_64259
ENSFDAG00000004280	Crem	Enhancers_Liver_39747
ENSFDAG00000019150	Wac	Enhancers_Liver_39747
ENSFDAG00000015988	Pard3	Enhancers_Liver_83880
ENSFDAG00000012723	Bambi	Enhancers_Liver_39770
ENSFDAG00000013390	Lyzl1	Enhancers_Liver_39770
ENSFDAG00000019578	Tnpo3	Enhancers_Liver_69536
ENSFDAG00000015115	Jcad	Enhancers_Liver_39828,Enhancers_Liver_39836,Enhancers_Liver_39846
ENSFDAG00000013706	Ccdc7b	Enhancers_Liver_39991,Enhancers_Liver_40013
ENSFDAG00000019433	Fzd8	Enhancers_Liver_39991,Enhancers_Liver_40013
ENSFDAG00000013416	Colec12	Enhancers_Liver_40040,Enhancers_Liver_40041,Enhancers_Liver_40047
ENSFDAG00000006842	Thoc1	Enhancers_Liver_40040,Enhancers_Liver_40041,Enhancers_Liver_40047
ENSFDAG00000017361	Cables1	Enhancers_Liver_40168,Enhancers_Liver_40173,Enhancers_Liver_40179
ENSFDAG00000015415	Tmem241	Enhancers_Liver_40168,Enhancers_Liver_40173,Enhancers_Liver_40179
ENSFDAG00000004358	Ankrd29	Enhancers_Liver_40207
ENSFDAG00000006090	Cdh2	Enhancers_Liver_40319,Enhancers_Liver_40321,Enhancers_Liver_40332,Enhancers_Liver_40336,Enhancers_Liver_40339,Enhancers_Liver_40341,Enhancers_Liver_40350,Enhancers_Liver_40353
ENSFDAG00000013871	Psme3ip1	Enhancers_Liver_40319,Enhancers_Liver_40321,Enhancers_Liver_40332,Enhancers_Liver_40336,Enhancers_Liver_40339,Enhancers_Liver_40341,Enhancers_Liver_40350,Enhancers_Liver_40353
ENSFDAG00000006724	Dsc3	Enhancers_Liver_40385
ENSFDAG00000018280	N.A	Enhancers_Liver_40412,Enhancers_Liver_40418
ENSFDAG00000006598	Ttr	Enhancers_Liver_40412,Enhancers_Liver_40418,Enhancers_Liver_40422,Enhancers_Liver_40423
ENSFDAG00000012980	Garem1	Enhancers_Liver_40480
ENSFDAG00000021141	Dtna	Enhancers_Liver_40519
ENSFDAG00000004907	Mapre2	Enhancers_Liver_40519
ENSFDAG00000018500	Ino80c	Enhancers_Liver_40543
ENSFDAG00000006766	Zfp24	Enhancers_Liver_40543
ENSFDAG00000010287	Celf4	Enhancers_Liver_40571
ENSFDAG00000017660	AW554918	Enhancers_Liver_40571
ENSFDAG00000011347	Lrrtm2	Enhancers_Liver_40759
ENSFDAG00000014162	Sil1	Enhancers_Liver_40759
ENSFDAG00000018945	Arap3	Enhancers_Liver_40913
ENSFDAG00000003084	Pcdh1	Enhancers_Liver_40913
ENSFDAG00000015929	Spry4	Enhancers_Liver_41016,Enhancers_Liver_41017,Enhancers_Liver_41019,Enhancers_Liver_41022,Enhancers_Liver_41023,Enhancers_Liver_41024,Enhancers_Liver_41027
ENSFDAG00000010332	Fgf1	Enhancers_Liver_41016,Enhancers_Liver_41017,Enhancers_Liver_41019,Enhancers_Liver_41022,Enhancers_Liver_41023,Enhancers_Liver_41024,Enhancers_Liver_41027
ENSFDAG00000015508	Arhgap26	Enhancers_Liver_41054,Enhancers_Liver_41078
ENSFDAG00000013951	Arhgap26	Enhancers_Liver_41103
ENSFDAG00000019570	Nr3c1	Enhancers_Liver_41103,Enhancers_Liver_41144,Enhancers_Liver_41193,Enhancers_Liver_41194
ENSFDAG00000013503	Yipf5	Enhancers_Liver_41144,Enhancers_Liver_41193,Enhancers_Liver_41194
ENSFDAG00000000927	Kcnn2	Enhancers_Liver_41337
ENSFDAG00000021119	Trim36	Enhancers_Liver_41337
ENSFDAG00000009820	Ccdc112	Enhancers_Liver_41398
ENSFDAG00000008917	Fem1c	Enhancers_Liver_41398
ENSFDAG00000006702	Cdo1	Enhancers_Liver_41448
ENSFDAG00000015336	Atg12	Enhancers_Liver_41448
ENSFDAG00000010261	Commd10	Enhancers_Liver_41454
ENSFDAG00000014660	Sema6a	Enhancers_Liver_41454,Enhancers_Liver_41488
ENSFDAG00000006140	Tnfaip8	Enhancers_Liver_41522,Enhancers_Liver_41523,Enhancers_Liver_41524
ENSFDAG00000013528	Dmxl1	Enhancers_Liver_41522
ENSFDAG00000020051	Snx2	Enhancers_Liver_41586
ENSFDAG00000001634	N.A	Enhancers_Liver_41586
ENSFDAG00000007522	Zfp608	Enhancers_Liver_41661,Enhancers_Liver_41669,Enhancers_Liver_41670,Enhancers_Liver_41679,Enhancers_Liver_41681,Enhancers_Liver_41684,Enhancers_Liver_41707,Enhancers_Liver_41724,Enhancers_Liver_41736
ENSFDAG00000008011	Cry1	Enhancers_Liver_41661,Enhancers_Liver_41669,Enhancers_Liver_41670,Enhancers_Liver_41679,Enhancers_Liver_41681,Enhancers_Liver_41684
ENSFDAG00000001653	Gramd3	Enhancers_Liver_41736
ENSFDAG00000018310	Lmnb1	Enhancers_Liver_41771
ENSFDAG00000018826	Tex43	Enhancers_Liver_41771
ENSFDAG00000007015	Chsy3	Enhancers_Liver_41840,Enhancers_Liver_41845
ENSFDAG00000014187	Minar2	Enhancers_Liver_41840,Enhancers_Liver_41845
ENSFDAG00000017840	Dctn4	Enhancers_Liver_41880
ENSFDAG00000013125	Synpo	Enhancers_Liver_41887,Enhancers_Liver_41896
ENSFDAG00000012794	Ndst1	Enhancers_Liver_41887,Enhancers_Liver_41896
ENSFDAG00000008719	Ppargc1b	Enhancers_Liver_41986,Enhancers_Liver_41993,Enhancers_Liver_42010
ENSFDAG00000011817	Pde6a	Enhancers_Liver_41986
ENSFDAG00000017008	Arhgef37	Enhancers_Liver_41993,Enhancers_Liver_42010
ENSFDAG00000012450	Il17b	Enhancers_Liver_42047
ENSFDAG00000010678	Csnk1a1	Enhancers_Liver_42047
ENSFDAG00000000343	Afap1l1	Enhancers_Liver_42076,Enhancers_Liver_42089,Enhancers_Liver_42090,Enhancers_Liver_42091
ENSFDAG00000016434	Ablim3	Enhancers_Liver_42076,Enhancers_Liver_42089,Enhancers_Liver_42090,Enhancers_Liver_42091
ENSFDAG00000003357	Tcf4	Enhancers_Liver_42182,Enhancers_Liver_42478
ENSFDAG00000017273	Txnl1	Enhancers_Liver_42182,Enhancers_Liver_42478
ENSFDAG00000006409	Wdr7	Enhancers_Liver_42206
ENSFDAG00000016915	Onecut2	Enhancers_Liver_42215,Enhancers_Liver_42218,Enhancers_Liver_42224
ENSFDAG00000009263	Fech	Enhancers_Liver_42215,Enhancers_Liver_42218,Enhancers_Liver_42224
ENSFDAG00000008827	Atp8b1	Enhancers_Liver_42243,Enhancers_Liver_42246,Enhancers_Liver_42248,Enhancers_Liver_42256
ENSFDAG00000014404	Socs6	Enhancers_Liver_42243,Enhancers_Liver_42246,Enhancers_Liver_42248,Enhancers_Liver_42256
ENSFDAG00000000579	Nedd4l	Enhancers_Liver_42317,Enhancers_Liver_42320,Enhancers_Liver_42328,Enhancers_Liver_42329
ENSFDAG00000000368	Alpk2	Enhancers_Liver_42317,Enhancers_Liver_42320,Enhancers_Liver_42328,Enhancers_Liver_42329
ENSFDAG00000005824	Tigd2	Enhancers_Liver_42346
ENSFDAG00000002551	Zfp532	Enhancers_Liver_42346,Enhancers_Liver_42366,Enhancers_Liver_42367
ENSFDAG00000012757	Oacyl	Enhancers_Liver_42366,Enhancers_Liver_42367
ENSFDAG00000015012	Ccbe1	Enhancers_Liver_42403,Enhancers_Liver_42406
ENSFDAG00000012197	Nmd3	Enhancers_Liver_42406
ENSFDAG00000015096	Mbd2	Enhancers_Liver_42545
ENSFDAG00000004957	Poli	Enhancers_Liver_42545
ENSFDAG00000002921	Me2	Enhancers_Liver_42583
ENSFDAG00000001058	Mro	Enhancers_Liver_42583
ENSFDAG00000009406	Acaa2	Enhancers_Liver_42615,Enhancers_Liver_42654
ENSFDAG00000008217	Lipg	Enhancers_Liver_42654
ENSFDAG00000017379	Ctif	Enhancers_Liver_42721,Enhancers_Liver_42749
ENSFDAG00000018792	Zbtb7c	Enhancers_Liver_42721,Enhancers_Liver_42749
ENSFDAG00000005915	Slc14a1	Enhancers_Liver_42808
ENSFDAG00000012230	Slc14a2	Enhancers_Liver_42808
ENSFDAG00000017535	Kcng2	Enhancers_Liver_42874,Enhancers_Liver_42882
ENSFDAG00000016869	Slc66a2	Enhancers_Liver_42874,Enhancers_Liver_42882
ENSFDAG00000013046	Ctdp1	Enhancers_Liver_42891,Enhancers_Liver_42902
ENSFDAG00000014978	Nfatc1	Enhancers_Liver_42891,Enhancers_Liver_42902
ENSFDAG00000014415	Cd226	Enhancers_Liver_43056
ENSFDAG00000002642	Ppp6r3	Enhancers_Liver_43098,Enhancers_Liver_43107
ENSFDAG00000011119	Lrp5	Enhancers_Liver_43098,Enhancers_Liver_43107,Enhancers_Liver_43117,Enhancers_Liver_43118
ENSFDAG00000000724	1810055G02Rik	Enhancers_Liver_43117,Enhancers_Liver_43118,Enhancers_Liver_43125
ENSFDAG00000010340	Kmt5b	Enhancers_Liver_43125
ENSFDAG00000017795	Ankrd13d	Enhancers_Liver_43188
ENSFDAG00000009655	Grk2	Enhancers_Liver_43188
ENSFDAG00000012657	2010003K11Rik	Enhancers_Liver_43217,Enhancers_Liver_43224
ENSFDAG00000016571	Pcx	Enhancers_Liver_43217,Enhancers_Liver_43224
ENSFDAG00000002787	Rbm14	Enhancers_Liver_43249
ENSFDAG00000009378	Ccs	Enhancers_Liver_43249
ENSFDAG00000000937	Fosl1	Enhancers_Liver_43278
ENSFDAG00000018634	Ccdc85b	Enhancers_Liver_43278
ENSFDAG00000009060	Fibp	Enhancers_Liver_43278
ENSFDAG00000007951	Cdc42ep2	Enhancers_Liver_43328,Enhancers_Liver_43329
ENSFDAG00000007087	Pola2	Enhancers_Liver_43328,Enhancers_Liver_43329
ENSFDAG00000007780	Ccdc88b	Enhancers_Liver_43396
ENSFDAG00000009549	Flrt1	Enhancers_Liver_43431
ENSFDAG00000005798	Otub1	Enhancers_Liver_43431
ENSFDAG00000000973	Rcor2	Enhancers_Liver_43447,Enhancers_Liver_43448,Enhancers_Liver_43449
ENSFDAG00000018435	Mark2	Enhancers_Liver_43447,Enhancers_Liver_43448,Enhancers_Liver_43449
ENSFDAG00000005337	Ms4a13	Enhancers_Liver_43609
ENSFDAG00000006637	Ms4a1	Enhancers_Liver_43609
ENSFDAG00000000132	Cep78	Enhancers_Liver_43704,Enhancers_Liver_43705,Enhancers_Liver_43706,Enhancers_Liver_43712
ENSFDAG00000018106	N.A	Enhancers_Liver_43704,Enhancers_Liver_43705,Enhancers_Liver_43706,Enhancers_Liver_43712
ENSFDAG00000006078	Vipr2	Enhancers_Liver_43721
ENSFDAG00000002793	Gm49359	Enhancers_Liver_43721
ENSFDAG00000015789	Tmc1	Enhancers_Liver_43872
ENSFDAG00000012375	Zfand5	Enhancers_Liver_43872
ENSFDAG00000001514	Abhd17b	Enhancers_Liver_43918
ENSFDAG00000013372	Cemip2	Enhancers_Liver_43918,Enhancers_Liver_43926,Enhancers_Liver_43935,Enhancers_Liver_43943,Enhancers_Liver_43944,Enhancers_Liver_43951,Enhancers_Liver_43952
ENSFDAG00000012083	Trpm3	Enhancers_Liver_43926,Enhancers_Liver_43935,Enhancers_Liver_43943,Enhancers_Liver_43944,Enhancers_Liver_43951,Enhancers_Liver_43952,Enhancers_Liver_43971,Enhancers_Liver_43997
ENSFDAG00000008457	Klf9	Enhancers_Liver_43971,Enhancers_Liver_43997,Enhancers_Liver_44014
ENSFDAG00000015908	Kank1	Enhancers_Liver_44130,Enhancers_Liver_44138,Enhancers_Liver_44144
ENSFDAG00000005670	Dmrt1	Enhancers_Liver_44138,Enhancers_Liver_44144
ENSFDAG00000019624	Ric1	Enhancers_Liver_44297
ENSFDAG00000011815	Cd274	Enhancers_Liver_44297
ENSFDAG00000009747	Dkk1	Enhancers_Liver_44381
ENSFDAG00000021170	Cstf2t	Enhancers_Liver_44381
ENSFDAG00000019371	A1cf	Enhancers_Liver_44413,Enhancers_Liver_44415
ENSFDAG00000005984	Asah2	Enhancers_Liver_44413,Enhancers_Liver_44415,Enhancers_Liver_44457,Enhancers_Liver_44460,Enhancers_Liver_44484,Enhancers_Liver_44487
ENSFDAG00000012550	Sgms1	Enhancers_Liver_44457,Enhancers_Liver_44460,Enhancers_Liver_44484,Enhancers_Liver_44487
ENSFDAG00000008831	Papss2	Enhancers_Liver_44502
ENSFDAG00000005557	Atad1	Enhancers_Liver_44502
ENSFDAG00000004696	Pten	Enhancers_Liver_44543,Enhancers_Liver_44557,Enhancers_Liver_44580,Enhancers_Liver_44582
ENSFDAG00000002016	Rnls	Enhancers_Liver_44543,Enhancers_Liver_44557,Enhancers_Liver_44580,Enhancers_Liver_44582
ENSFDAG00000007694	Ankrd22	Enhancers_Liver_44613
ENSFDAG00000014562	Stambpl1	Enhancers_Liver_44613
ENSFDAG00000003380	Exoc6	Enhancers_Liver_44806,Enhancers_Liver_44807
ENSFDAG00000021531	N.A	Enhancers_Liver_44806,Enhancers_Liver_44807
ENSFDAG00000019030	Cyp26a1	Enhancers_Liver_44841
ENSFDAG00000021206	Myof	Enhancers_Liver_44841
ENSFDAG00000015661	Rbp4	Enhancers_Liver_44855
ENSFDAG00000020893	Fra10ac1	Enhancers_Liver_44857,Enhancers_Liver_44869,Enhancers_Liver_44870
ENSFDAG00000013565	Pde6c	Enhancers_Liver_44857,Enhancers_Liver_44869,Enhancers_Liver_44870
ENSFDAG00000008472	Cyp2c55	Enhancers_Liver_44918
ENSFDAG00000010042	Hells	Enhancers_Liver_44918
ENSFDAG00000004596	Pdlim1	Enhancers_Liver_44961,Enhancers_Liver_44974,Enhancers_Liver_44982
ENSFDAG00000018081	Sorbs1	Enhancers_Liver_44974,Enhancers_Liver_44982,Enhancers_Liver_44990,Enhancers_Liver_44998,Enhancers_Liver_45011,Enhancers_Liver_45021
ENSFDAG00000011862	Aldh18a1	Enhancers_Liver_44990,Enhancers_Liver_44998,Enhancers_Liver_45011,Enhancers_Liver_45021
ENSFDAG00000017007	Crtac1	Enhancers_Liver_45169
ENSFDAG00000010080	R3hcc1l	Enhancers_Liver_45169,Enhancers_Liver_45175
ENSFDAG00000005906	Krr1	Enhancers_Liver_45182
ENSFDAG00000020858	Loxl4	Enhancers_Liver_45182,Enhancers_Liver_45190,Enhancers_Liver_45200,Enhancers_Liver_45203
ENSFDAG00000019820	Pyroxd2	Enhancers_Liver_45190,Enhancers_Liver_45200,Enhancers_Liver_45203
ENSFDAG00000008507	Hps1	Enhancers_Liver_45208
ENSFDAG00000017890	Hpse2	Enhancers_Liver_45208
ENSFDAG00000017546	Nkx2-3	Enhancers_Liver_45235
ENSFDAG00000015231	Slc25a28	Enhancers_Liver_45235
ENSFDAG00000007088	Cpn1	Enhancers_Liver_45285,Enhancers_Liver_45290
ENSFDAG00000011149	Erlin1	Enhancers_Liver_45285,Enhancers_Liver_45290
ENSFDAG00000006085	Syce1	Enhancers_Liver_78920
ENSFDAG00000021015	Slf2	Enhancers_Liver_45330
ENSFDAG00000004179	Sema4g	Enhancers_Liver_45330
ENSFDAG00000001339	Sfxn2	Enhancers_Liver_45422
ENSFDAG00000009843	Wbp1l	Enhancers_Liver_45422
ENSFDAG00000006706	Cnnm2	Enhancers_Liver_45449
ENSFDAG00000001181	Nt5c2	Enhancers_Liver_45449
ENSFDAG00000013994	Neurl1a	Enhancers_Liver_45483,Enhancers_Liver_45484,Enhancers_Liver_45510
ENSFDAG00000011219	Sh3pxd2a	Enhancers_Liver_45483,Enhancers_Liver_45484,Enhancers_Liver_45510,Enhancers_Liver_45522,Enhancers_Liver_45523
ENSFDAG00000007528	Stn1	Enhancers_Liver_45522,Enhancers_Liver_45523
ENSFDAG00000007620	Gsto2	Enhancers_Liver_45543
ENSFDAG00000014589	Cfap58	Enhancers_Liver_45543
ENSFDAG00000018706	Sorcs1	Enhancers_Liver_45584
ENSFDAG00000018482	Prelid3b	Enhancers_Liver_45584
ENSFDAG00000013418	Plekhs1	Enhancers_Liver_45818
ENSFDAG00000012510	Casp7	Enhancers_Liver_45818
ENSFDAG00000004873	Adrb1	Enhancers_Liver_45847
ENSFDAG00000006780	Ccdc186	Enhancers_Liver_45847
ENSFDAG00000005563	Gfra1	Enhancers_Liver_45926
ENSFDAG00000014074	Rsrc2	Enhancers_Liver_45926
ENSFDAG00000006454	Eno4	Enhancers_Liver_45971,Enhancers_Liver_45972
ENSFDAG00000011605	1700019N19Rik	Enhancers_Liver_45971,Enhancers_Liver_45972
ENSFDAG00000002990	Fam171a1	Enhancers_Liver_46071
ENSFDAG00000017239	Nmt2	Enhancers_Liver_46071
ENSFDAG00000021217	Cdnf	Enhancers_Liver_46094
ENSFDAG00000006169	Fam107b	Enhancers_Liver_46094,Enhancers_Liver_46113
ENSFDAG00000005402	Frmd4a	Enhancers_Liver_46113,Enhancers_Liver_46163,Enhancers_Liver_46167,Enhancers_Liver_46168
ENSFDAG00000014026	Prpf18	Enhancers_Liver_46163,Enhancers_Liver_46167,Enhancers_Liver_46168
ENSFDAG00000016616	N.A	Enhancers_Liver_46189
ENSFDAG00000018837	Sephs1	Enhancers_Liver_46189
ENSFDAG00000016330	N.A	Enhancers_Liver_46371
ENSFDAG00000010291	Gata3	Enhancers_Liver_46371
ENSFDAG00000008423	Prkcq	Enhancers_Liver_46410
ENSFDAG00000000708	Pfkfb3	Enhancers_Liver_46410
ENSFDAG00000014906	Tmem236	Enhancers_Liver_46545
ENSFDAG00000010860	Arl5b	Enhancers_Liver_78178
ENSFDAG00000020843	Malrd1	Enhancers_Liver_78178
ENSFDAG00000013264	Pip4k2a	Enhancers_Liver_46636,Enhancers_Liver_46643
ENSFDAG00000002277	Bmi1	Enhancers_Liver_46636
ENSFDAG00000017978	Armc3	Enhancers_Liver_46643
ENSFDAG00000011901	Arhgap21	Enhancers_Liver_46780
ENSFDAG00000000154	Enkur	Enhancers_Liver_46780
ENSFDAG00000017483	Treh	Enhancers_Liver_85251
ENSFDAG00000015561	Inpp5e	Enhancers_Liver_46967
ENSFDAG00000007207	Adamts13	Enhancers_Liver_47021
ENSFDAG00000002573	Cacfd1	Enhancers_Liver_47021
ENSFDAG00000007102	Slc2a6	Enhancers_Liver_47029
ENSFDAG00000015710	Mymk	Enhancers_Liver_47029
ENSFDAG00000013467	Adamtsl2	Enhancers_Liver_47030
ENSFDAG00000007174	Wdr5	Enhancers_Liver_47080,Enhancers_Liver_47088
ENSFDAG00000015606	Rxra	Enhancers_Liver_47080,Enhancers_Liver_47088,Enhancers_Liver_47098,Enhancers_Liver_47099
ENSFDAG00000007073	Col5a1	Enhancers_Liver_47099
ENSFDAG00000011441	Olfm1	Enhancers_Liver_47124
ENSFDAG00000019450	Ppp1r26	Enhancers_Liver_47124
ENSFDAG00000014842	Gfi1b	Enhancers_Liver_47135
ENSFDAG00000010074	Rapgef1	Enhancers_Liver_47175
ENSFDAG00000011615	Med27	Enhancers_Liver_47175
ENSFDAG00000012591	Ptpa	Enhancers_Liver_47259
ENSFDAG00000004758	Ntmt1	Enhancers_Liver_47259
ENSFDAG00000014959	Lcn2	Enhancers_Liver_47381
ENSFDAG00000008256	Garnl3	Enhancers_Liver_47483
ENSFDAG00000015903	Angptl2	Enhancers_Liver_47483,Enhancers_Liver_47514
ENSFDAG00000014915	Ralgps1	Enhancers_Liver_47514
ENSFDAG00000014765	Mvb12b	Enhancers_Liver_47558
ENSFDAG00000009509	Pbx3	Enhancers_Liver_47558
ENSFDAG00000005706	Mapkap1	Enhancers_Liver_47569,Enhancers_Liver_47571
ENSFDAG00000000786	Gapvd1	Enhancers_Liver_47569,Enhancers_Liver_47571
ENSFDAG00000010567	Ggta1	Enhancers_Liver_47664
ENSFDAG00000017614	Dab2ip	Enhancers_Liver_47664
ENSFDAG00000010970	Ndufa8	Enhancers_Liver_47692
ENSFDAG00000016594	Lhx6	Enhancers_Liver_47692
ENSFDAG00000012679	Rbm18	Enhancers_Liver_47707,Enhancers_Liver_47711,Enhancers_Liver_47712,Enhancers_Liver_47713
ENSFDAG00000012805	Ptgs1	Enhancers_Liver_47707,Enhancers_Liver_47711,Enhancers_Liver_47712,Enhancers_Liver_47713
ENSFDAG00000021252	Rabgap1	Enhancers_Liver_47734,Enhancers_Liver_47741
ENSFDAG00000014136	Strbp	Enhancers_Liver_47734,Enhancers_Liver_47741,Enhancers_Liver_47755
ENSFDAG00000012174	Crb2	Enhancers_Liver_47755
ENSFDAG00000003338	Nek6	Enhancers_Liver_47800,Enhancers_Liver_47804
ENSFDAG00000018938	Psmb7	Enhancers_Liver_47804
ENSFDAG00000019034	Nr5a1	Enhancers_Liver_47822
ENSFDAG00000021444	Nr6a1	Enhancers_Liver_47822
ENSFDAG00000016607	Pik3r3	Enhancers_Liver_61265
ENSFDAG00000020140	Kynu	Enhancers_Liver_47874,Enhancers_Liver_47903
ENSFDAG00000010773	Arhgap15	Enhancers_Liver_47874,Enhancers_Liver_47903,Enhancers_Liver_47912,Enhancers_Liver_47934
ENSFDAG00000018254	Gtdc1	Enhancers_Liver_47912,Enhancers_Liver_47934,Enhancers_Liver_47958,Enhancers_Liver_47961
ENSFDAG00000004686	Zeb2	Enhancers_Liver_47958,Enhancers_Liver_47961,Enhancers_Liver_47967,Enhancers_Liver_47970,Enhancers_Liver_47973,Enhancers_Liver_47983,Enhancers_Liver_47987
ENSFDAG00000001117	Acvr2a	Enhancers_Liver_48059
ENSFDAG00000019104	Mmadhc	Enhancers_Liver_48126
ENSFDAG00000008589	Rnd3	Enhancers_Liver_48126
ENSFDAG00000012333	Nmi	Enhancers_Liver_48168
ENSFDAG00000020400	Tnfaip6	Enhancers_Liver_48168
ENSFDAG00000004623	Stam2	Enhancers_Liver_48221,Enhancers_Liver_48237,Enhancers_Liver_48242
ENSFDAG00000016001	Fmnl2	Enhancers_Liver_48221,Enhancers_Liver_48237,Enhancers_Liver_48242
ENSFDAG00000017384	Arl6ip6	Enhancers_Liver_48262
ENSFDAG00000015354	Ptges3	Enhancers_Liver_48262
ENSFDAG00000012700	Gpd2	Enhancers_Liver_48306,Enhancers_Liver_48309
ENSFDAG00000010528	Snrpn	Enhancers_Liver_48306,Enhancers_Liver_48309
ENSFDAG00000014330	Ermn	Enhancers_Liver_48310,Enhancers_Liver_48311,Enhancers_Liver_48312,Enhancers_Liver_48313,Enhancers_Liver_48314
ENSFDAG00000007195	Acvr1	Enhancers_Liver_48318,Enhancers_Liver_48326,Enhancers_Liver_48330
ENSFDAG00000017907	Upp2	Enhancers_Liver_48326,Enhancers_Liver_48330
ENSFDAG00000017127	Pkp4	Enhancers_Liver_48381
ENSFDAG00000001796	Dapl1	Enhancers_Liver_48381
ENSFDAG00000000093	Tanc1	Enhancers_Liver_48397,Enhancers_Liver_48398
ENSFDAG00000012994	Wdsub1	Enhancers_Liver_48397,Enhancers_Liver_48398
ENSFDAG00000007714	Itgb6	Enhancers_Liver_48462,Enhancers_Liver_48500
ENSFDAG00000015692	Rbms1	Enhancers_Liver_48462,Enhancers_Liver_48500,Enhancers_Liver_48505,Enhancers_Liver_48519
ENSFDAG00000010413	Tank	Enhancers_Liver_48505,Enhancers_Liver_48519
ENSFDAG00000019771	Kcnh7	Enhancers_Liver_48571,Enhancers_Liver_48572,Enhancers_Liver_48573,Enhancers_Liver_48574,Enhancers_Liver_48576,Enhancers_Liver_48581
ENSFDAG00000014550	Fign	Enhancers_Liver_48571,Enhancers_Liver_48572,Enhancers_Liver_48573,Enhancers_Liver_48574,Enhancers_Liver_48576,Enhancers_Liver_48581,Enhancers_Liver_48587,Enhancers_Liver_48588
ENSFDAG00000006600	Grb14	Enhancers_Liver_48587,Enhancers_Liver_48588,Enhancers_Liver_48603,Enhancers_Liver_48604,Enhancers_Liver_48612
ENSFDAG00000000913	Cobll1	Enhancers_Liver_48603,Enhancers_Liver_48604,Enhancers_Liver_48612,Enhancers_Liver_48640
ENSFDAG00000002341	Slc38a11	Enhancers_Liver_48640,Enhancers_Liver_48645,Enhancers_Liver_48654
ENSFDAG00000007384	Scn3a	Enhancers_Liver_48645,Enhancers_Liver_48654
ENSFDAG00000018472	Xirp2	Enhancers_Liver_48678
ENSFDAG00000017530	B3galt1	Enhancers_Liver_48678
ENSFDAG00000018836	Dhrs9	Enhancers_Liver_48795
ENSFDAG00000017929	Lrp2	Enhancers_Liver_48795
ENSFDAG00000011120	Gad1	Enhancers_Liver_48825
ENSFDAG00000020546	Gorasp2	Enhancers_Liver_48825
ENSFDAG00000012862	Metap1d	Enhancers_Liver_48865
ENSFDAG00000020944	Dlx1	Enhancers_Liver_48865
ENSFDAG00000007385	Cdca7	Enhancers_Liver_48958
ENSFDAG00000018454	Sp3	Enhancers_Liver_48958
ENSFDAG00000013649	Wipf1	Enhancers_Liver_48996,Enhancers_Liver_48997
ENSFDAG00000005988	Chrna1	Enhancers_Liver_48996,Enhancers_Liver_48997
ENSFDAG00000006448	Nfe2l2	Enhancers_Liver_49101,Enhancers_Liver_49102,Enhancers_Liver_49105,Enhancers_Liver_49106,Enhancers_Liver_49113,Enhancers_Liver_49117
ENSFDAG00000011770	Agps	Enhancers_Liver_49101,Enhancers_Liver_49102,Enhancers_Liver_49105,Enhancers_Liver_49106,Enhancers_Liver_49113,Enhancers_Liver_49117
ENSFDAG00000002857	Osbpl6	Enhancers_Liver_49142
ENSFDAG00000021152	Ccdc141	Enhancers_Liver_49169
ENSFDAG00000014276	Sestd1	Enhancers_Liver_49169,Enhancers_Liver_49185
ENSFDAG00000021322	Zfp385b	Enhancers_Liver_49185
ENSFDAG00000011491	Ppp1r1c	Enhancers_Liver_49240,Enhancers_Liver_49242,Enhancers_Liver_49244,Enhancers_Liver_49245
ENSFDAG00000004386	Pde1a	Enhancers_Liver_49240,Enhancers_Liver_49242,Enhancers_Liver_49244,Enhancers_Liver_49245,Enhancers_Liver_49249,Enhancers_Liver_49251,Enhancers_Liver_49252,Enhancers_Liver_49253
ENSFDAG00000017041	Cdc42	Enhancers_Liver_49266,Enhancers_Liver_49267
ENSFDAG00000013457	Dnajc10	Enhancers_Liver_49266,Enhancers_Liver_49267,Enhancers_Liver_49273
ENSFDAG00000003666	Frzb	Enhancers_Liver_49273
ENSFDAG00000019795	Zbtb10	Enhancers_Liver_53173,Enhancers_Liver_53179
ENSFDAG00000015839	Itgav	Enhancers_Liver_49316,Enhancers_Liver_49318
ENSFDAG00000009476	Fam171b	Enhancers_Liver_49316,Enhancers_Liver_49318
ENSFDAG00000009540	Zswim2	Enhancers_Liver_49326,Enhancers_Liver_49331,Enhancers_Liver_49332
ENSFDAG00000018059	Calcrl	Enhancers_Liver_49326,Enhancers_Liver_49331,Enhancers_Liver_49332
ENSFDAG00000012079	Olfr1497	Enhancers_Liver_49364
ENSFDAG00000013921	Ctnnd1	Enhancers_Liver_49364
ENSFDAG00000017134	Arfgap2	Enhancers_Liver_49493
ENSFDAG00000016215	Dgkz	Enhancers_Liver_49551,Enhancers_Liver_49556
ENSFDAG00000007548	Creb3l1	Enhancers_Liver_49556
ENSFDAG00000009076	Mapk8ip1	Enhancers_Liver_49580
ENSFDAG00000004625	Cry2	Enhancers_Liver_49580
ENSFDAG00000010930	Chst1	Enhancers_Liver_49598,Enhancers_Liver_49599
ENSFDAG00000020147	Syt13	Enhancers_Liver_49598,Enhancers_Liver_49599
ENSFDAG00000018904	Mycbp	Enhancers_Liver_90155
ENSFDAG00000007580	Dlg3	Enhancers_Liver_90155
ENSFDAG00000016167	Prdm11	Enhancers_Liver_49626,Enhancers_Liver_49635
ENSFDAG00000010691	Trp53i11	Enhancers_Liver_49626,Enhancers_Liver_49635
ENSFDAG00000008306	Tspan18	Enhancers_Liver_49674
ENSFDAG00000020524	Cd82	Enhancers_Liver_49674,Enhancers_Liver_49680
ENSFDAG00000005795	Alx4	Enhancers_Liver_49680,Enhancers_Liver_49684,Enhancers_Liver_49689
ENSFDAG00000010533	Ext2	Enhancers_Liver_49684,Enhancers_Liver_49689
ENSFDAG00000016366	Gm13889	Enhancers_Liver_49720
ENSFDAG00000012666	Gm27027	Enhancers_Liver_49720
ENSFDAG00000006866	Hsd17b12	Enhancers_Liver_49750
ENSFDAG00000019001	Ttc17	Enhancers_Liver_49750
ENSFDAG00000020847	Abtb2	Enhancers_Liver_49918,Enhancers_Liver_49919,Enhancers_Liver_49929,Enhancers_Liver_49930
ENSFDAG00000010525	Nat10	Enhancers_Liver_49918,Enhancers_Liver_49919,Enhancers_Liver_49929,Enhancers_Liver_49930
ENSFDAG00000005164	Fbxo3	Enhancers_Liver_49984
ENSFDAG00000006457	Cd59b	Enhancers_Liver_49984
ENSFDAG00000012082	Cstf3	Enhancers_Liver_50019
ENSFDAG00000018978	Tcp11l1	Enhancers_Liver_50019
ENSFDAG00000013063	Qser1	Enhancers_Liver_50027
ENSFDAG00000016094	Prrg4	Enhancers_Liver_50027
ENSFDAG00000016775	Lin7c	Enhancers_Liver_50092
ENSFDAG00000015854	Bbox1	Enhancers_Liver_50092,Enhancers_Liver_50097
ENSFDAG00000019088	Fmn1	Enhancers_Liver_50139
ENSFDAG00000003851	Grem1	Enhancers_Liver_50139,Enhancers_Liver_50145,Enhancers_Liver_50146
ENSFDAG00000009529	Scg5	Enhancers_Liver_50145,Enhancers_Liver_50146
ENSFDAG00000014942	Actc1	Enhancers_Liver_50164
ENSFDAG00000000252	Aqr	Enhancers_Liver_50164
ENSFDAG00000000825	Glyctk	Enhancers_Liver_50264
ENSFDAG00000010073	Col6a6	Enhancers_Liver_50264
ENSFDAG00000015914	Frmd5	Enhancers_Liver_50407
ENSFDAG00000017960	Golm2	Enhancers_Liver_50407
ENSFDAG00000010253	Blvra	Enhancers_Liver_50627
ENSFDAG00000005748	Bcl2l11	Enhancers_Liver_50665,Enhancers_Liver_50682,Enhancers_Liver_50683,Enhancers_Liver_50698
ENSFDAG00000016278	Anapc1	Enhancers_Liver_50665,Enhancers_Liver_50682,Enhancers_Liver_50683,Enhancers_Liver_50698
ENSFDAG00000021345	Mertk	Enhancers_Liver_50708,Enhancers_Liver_50712,Enhancers_Liver_50713,Enhancers_Liver_50714,Enhancers_Liver_50717,Enhancers_Liver_50718
ENSFDAG00000011475	Tmem87b	Enhancers_Liver_50708,Enhancers_Liver_50712,Enhancers_Liver_50713,Enhancers_Liver_50714,Enhancers_Liver_50717,Enhancers_Liver_50718
ENSFDAG00000008777	Slc20a1	Enhancers_Liver_50758
ENSFDAG00000013800	Ckap2l	Enhancers_Liver_50758
ENSFDAG00000016609	Il1a	Enhancers_Liver_50774
ENSFDAG00000009890	Il1b	Enhancers_Liver_50774,Enhancers_Liver_50781
ENSFDAG00000012447	Pank2	Enhancers_Liver_50901,Enhancers_Liver_50905
ENSFDAG00000019492	Rnf24	Enhancers_Liver_50901,Enhancers_Liver_50905
ENSFDAG00000007417	Tmx4	Enhancers_Liver_51105,Enhancers_Liver_51112
ENSFDAG00000017230	Plcb1	Enhancers_Liver_51105,Enhancers_Liver_51112,Enhancers_Liver_51159
ENSFDAG00000014815	Plcb4	Enhancers_Liver_51159
ENSFDAG00000006073	Jag1	Enhancers_Liver_51213
ENSFDAG00000005546	Btbd3	Enhancers_Liver_51213
ENSFDAG00000019801	Trim66	Enhancers_Liver_51246
ENSFDAG00000002932	Stk33	Enhancers_Liver_51246
ENSFDAG00000016071	Bfsp1	Enhancers_Liver_51318
ENSFDAG00000019422	Dstn	Enhancers_Liver_51318
ENSFDAG00000001656	Kat14	Enhancers_Liver_51377
ENSFDAG00000012641	N.A	Enhancers_Liver_51377
ENSFDAG00000003226	Slc24a3	Enhancers_Liver_51406
ENSFDAG00000001493	Rin2	Enhancers_Liver_51406
ENSFDAG00000014253	Kiz	Enhancers_Liver_51513
ENSFDAG00000016311	Xrn2	Enhancers_Liver_51513
ENSFDAG00000020086	Ccm2l	Enhancers_Liver_51732,Enhancers_Liver_51735,Enhancers_Liver_51736,Enhancers_Liver_51737
ENSFDAG00000005646	Hck	Enhancers_Liver_51735,Enhancers_Liver_51736,Enhancers_Liver_51737
ENSFDAG00000015598	N.A	Enhancers_Liver_51828
ENSFDAG00000010824	Chmp4b	Enhancers_Liver_51845
ENSFDAG00000019856	Ube2l3	Enhancers_Liver_51845
ENSFDAG00000011512	Ahcy	Enhancers_Liver_51857,Enhancers_Liver_51858,Enhancers_Liver_51861,Enhancers_Liver_51865,Enhancers_Liver_51868
ENSFDAG00000018216	N.A	Enhancers_Liver_51857,Enhancers_Liver_51858,Enhancers_Liver_51861,Enhancers_Liver_51865,Enhancers_Liver_51868
ENSFDAG00000018572	Map1lc3a	Enhancers_Liver_51886
ENSFDAG00000021046	Pigu	Enhancers_Liver_51886
ENSFDAG00000020451	Fam83c	Enhancers_Liver_51936
ENSFDAG00000008270	Uqcc1	Enhancers_Liver_51936
ENSFDAG00000005357	Phf20	Enhancers_Liver_51952
ENSFDAG00000002721	Scand1	Enhancers_Liver_51952
ENSFDAG00000014687	Rprd1b	Enhancers_Liver_52047
ENSFDAG00000009376	Tgm2	Enhancers_Liver_52047,Enhancers_Liver_52074,Enhancers_Liver_52079,Enhancers_Liver_52082
ENSFDAG00000008596	D630003M21Rik	Enhancers_Liver_52074,Enhancers_Liver_52079,Enhancers_Liver_52082
ENSFDAG00000002768	Actr5	Enhancers_Liver_52100,Enhancers_Liver_52103
ENSFDAG00000013109	Ppp1r16b	Enhancers_Liver_52100,Enhancers_Liver_52103,Enhancers_Liver_52104
ENSFDAG00000008804	Dcun1d4	Enhancers_Liver_52246
ENSFDAG00000020234	Mybl2	Enhancers_Liver_52265
ENSFDAG00000020899	Tox2	Enhancers_Liver_52265
ENSFDAG00000014819	Pkig	Enhancers_Liver_52315,Enhancers_Liver_52320
ENSFDAG00000018798	Ada	Enhancers_Liver_52320
ENSFDAG00000019190	Dbndd2	Enhancers_Liver_52367
ENSFDAG00000005941	Pigt	Enhancers_Liver_52367
ENSFDAG00000014602	Slc35c2	Enhancers_Liver_52401,Enhancers_Liver_52403
ENSFDAG00000008799	Elmo2	Enhancers_Liver_52401,Enhancers_Liver_52403
ENSFDAG00000017703	Ocstamp	Enhancers_Liver_52409
ENSFDAG00000021223	Slc13a3	Enhancers_Liver_52409
ENSFDAG00000006063	Prex1	Enhancers_Liver_52504,Enhancers_Liver_52507,Enhancers_Liver_52513,Enhancers_Liver_52536
ENSFDAG00000010998	Arfgef2	Enhancers_Liver_52536
ENSFDAG00000021453	B4galt5	Enhancers_Liver_52582
ENSFDAG00000021215	Ptgis	Enhancers_Liver_52582
ENSFDAG00000012667	Ptpn1	Enhancers_Liver_52655,Enhancers_Liver_52658,Enhancers_Liver_52659,Enhancers_Liver_52684,Enhancers_Liver_52685,Enhancers_Liver_52689,Enhancers_Liver_52695
ENSFDAG00000011001	Gm20431	Enhancers_Liver_52655,Enhancers_Liver_52658,Enhancers_Liver_52659
ENSFDAG00000009851	Ripor3	Enhancers_Liver_52684,Enhancers_Liver_52685,Enhancers_Liver_52689,Enhancers_Liver_52695
ENSFDAG00000017690	Nfatc2	Enhancers_Liver_52729,Enhancers_Liver_52731
ENSFDAG00000012236	Kcng1	Enhancers_Liver_52729
ENSFDAG00000008773	Atp9a	Enhancers_Liver_52731
ENSFDAG00000015889	Gm9774	Enhancers_Liver_52997
ENSFDAG00000020841	Lama5	Enhancers_Liver_52997
ENSFDAG00000013246	Tcfl5	Enhancers_Liver_53016
ENSFDAG00000010796	Dido1	Enhancers_Liver_53016
ENSFDAG00000010059	Fndc11	Enhancers_Liver_53050
ENSFDAG00000013078	Helz2	Enhancers_Liver_53050
ENSFDAG00000002686	Zfp704	Enhancers_Liver_53173,Enhancers_Liver_53179
ENSFDAG00000006659	Pag1	Enhancers_Liver_53188,Enhancers_Liver_53196,Enhancers_Liver_53201,Enhancers_Liver_53202
ENSFDAG00000015623	Fabp5	Enhancers_Liver_53188,Enhancers_Liver_53196,Enhancers_Liver_53201,Enhancers_Liver_53202
ENSFDAG00000009604	Car7	Enhancers_Liver_53301
ENSFDAG00000020867	Pdp2	Enhancers_Liver_53301
ENSFDAG00000008821	Cyp7b1	Enhancers_Liver_53363,Enhancers_Liver_53383
ENSFDAG00000012536	Tbl1xr1	Enhancers_Liver_53506,Enhancers_Liver_53516,Enhancers_Liver_53517
ENSFDAG00000003504	Naaladl2	Enhancers_Liver_53544
ENSFDAG00000019741	Ghsr	Enhancers_Liver_53644
ENSFDAG00000017805	Fndc3b	Enhancers_Liver_53644
ENSFDAG00000015942	Tmem212	Enhancers_Liver_53676,Enhancers_Liver_53677,Enhancers_Liver_53686
ENSFDAG00000012119	Pld1	Enhancers_Liver_53677,Enhancers_Liver_53686,Enhancers_Liver_53711
ENSFDAG00000015650	Tnik	Enhancers_Liver_53711,Enhancers_Liver_53726
ENSFDAG00000008731	Slc2a2	Enhancers_Liver_53726
ENSFDAG00000018402	Trpc3	Enhancers_Liver_53878
ENSFDAG00000012318	4932438A13Rik	Enhancers_Liver_53878
ENSFDAG00000000972	Tpt1	Enhancers_Liver_53919
ENSFDAG00000010505	Ankrd50	Enhancers_Liver_53919
ENSFDAG00000001467	Pgrmc2	Enhancers_Liver_54033,Enhancers_Liver_54035,Enhancers_Liver_54039
ENSFDAG00000011383	Jade1	Enhancers_Liver_54033,Enhancers_Liver_54035,Enhancers_Liver_54039
ENSFDAG00000005543	Pcdh18	Enhancers_Liver_54077,Enhancers_Liver_54082,Enhancers_Liver_54083
ENSFDAG00000016353	Slc7a11	Enhancers_Liver_54082,Enhancers_Liver_54083
ENSFDAG00000020383	Foxo1	Enhancers_Liver_54201
ENSFDAG00000016879	Cog6	Enhancers_Liver_54201
ENSFDAG00000007168	Lhfp	Enhancers_Liver_54265,Enhancers_Liver_54269
ENSFDAG00000006334	Nhlrc3	Enhancers_Liver_54269
ENSFDAG00000016202	Tm4sf1	Enhancers_Liver_54332
ENSFDAG00000018794	Polr2k	Enhancers_Liver_54332
ENSFDAG00000010318	Pfn2	Enhancers_Liver_54369,Enhancers_Liver_54380,Enhancers_Liver_54384
ENSFDAG00000021282	Tsc22d2	Enhancers_Liver_54369,Enhancers_Liver_54380,Enhancers_Liver_54384
ENSFDAG00000021088	Med12l	Enhancers_Liver_54413,Enhancers_Liver_54417
ENSFDAG00000019978	P2ry14	Enhancers_Liver_54413,Enhancers_Liver_54417,Enhancers_Liver_54419,Enhancers_Liver_54427,Enhancers_Liver_54428
ENSFDAG00000010227	Gpr87	Enhancers_Liver_54427,Enhancers_Liver_54428,Enhancers_Liver_54431
ENSFDAG00000018983	Igsf10	Enhancers_Liver_54440
ENSFDAG00000011893	Aadacl2	Enhancers_Liver_54440
ENSFDAG00000016369	Sucnr1	Enhancers_Liver_54451
ENSFDAG00000011912	N.A	Enhancers_Liver_54451,Enhancers_Liver_54459,Enhancers_Liver_54464,Enhancers_Liver_54466,Enhancers_Liver_54467
ENSFDAG00000012639	Mbnl1	Enhancers_Liver_54459,Enhancers_Liver_54464,Enhancers_Liver_54466,Enhancers_Liver_54467,Enhancers_Liver_54492
ENSFDAG00000003809	P2ry1	Enhancers_Liver_54492
ENSFDAG00000003107	Ssr3	Enhancers_Liver_54576,Enhancers_Liver_54577
ENSFDAG00000008747	Tiparp	Enhancers_Liver_54576,Enhancers_Liver_54577
ENSFDAG00000007421	Kpna4	Enhancers_Liver_54692
ENSFDAG00000000707	Arl14	Enhancers_Liver_54692
ENSFDAG00000011051	Ppm1l	Enhancers_Liver_54724
ENSFDAG00000007645	B3galnt1	Enhancers_Liver_54724
ENSFDAG00000020346	N.A	Enhancers_Liver_54791
ENSFDAG00000007919	Rapgef2	Enhancers_Liver_54791,Enhancers_Liver_54816
ENSFDAG00000012651	N.A	Enhancers_Liver_54816
ENSFDAG00000009390	Asic5	Enhancers_Liver_54921
ENSFDAG00000017720	Gucy1b1	Enhancers_Liver_54921,Enhancers_Liver_54929
ENSFDAG00000002854	Gucy1a1	Enhancers_Liver_54944,Enhancers_Liver_54948
ENSFDAG00000000956	Map9	Enhancers_Liver_54944,Enhancers_Liver_54948
ENSFDAG00000016733	Tbc1d9	Enhancers_Liver_81557
ENSFDAG00000007604	Dchs2	Enhancers_Liver_54992
ENSFDAG00000009531	Sfrp2	Enhancers_Liver_54992
ENSFDAG00000012958	Tlr2	Enhancers_Liver_55016
ENSFDAG00000013273	Cdyl	Enhancers_Liver_55016
ENSFDAG00000008138	Mnd1	Enhancers_Liver_55020,Enhancers_Liver_55028
ENSFDAG00000007590	Tmem131l	Enhancers_Liver_55020,Enhancers_Liver_55028
ENSFDAG00000010898	Tmem154	Enhancers_Liver_55064
ENSFDAG00000017207	Tigd4	Enhancers_Liver_55064
ENSFDAG00000007879	Slc25a44	Enhancers_Liver_55254
ENSFDAG00000009919	Sema4a	Enhancers_Liver_55254
ENSFDAG00000012478	Arhgef2	Enhancers_Liver_55279
ENSFDAG00000018421	Ltb4r1	Enhancers_Liver_55279
ENSFDAG00000007397	Ash1l	Enhancers_Liver_55296
ENSFDAG00000015872	Fdps	Enhancers_Liver_55296
ENSFDAG00000013088	Mrps21	Enhancers_Liver_55569
ENSFDAG00000010365	Prpf3	Enhancers_Liver_55569
ENSFDAG00000012778	Vps45	Enhancers_Liver_55584
ENSFDAG00000011326	Otud7b	Enhancers_Liver_55584
ENSFDAG00000009286	Sf3b4	Enhancers_Liver_55595
ENSFDAG00000005696	Gpr89	Enhancers_Liver_55642
ENSFDAG00000012342	Gja5	Enhancers_Liver_55642
ENSFDAG00000018553	Sec22b	Enhancers_Liver_55686,Enhancers_Liver_55688,Enhancers_Liver_55721
ENSFDAG00000014859	Notch2	Enhancers_Liver_55686,Enhancers_Liver_55688,Enhancers_Liver_55721
ENSFDAG00000021193	Igsf3	Enhancers_Liver_55889,Enhancers_Liver_55890,Enhancers_Liver_55891
ENSFDAG00000010600	Atp1a1	Enhancers_Liver_55889,Enhancers_Liver_55890,Enhancers_Liver_55891
ENSFDAG00000005758	Vangl1	Enhancers_Liver_55926
ENSFDAG00000017429	Ngf	Enhancers_Liver_55926
ENSFDAG00000010574	Rap1a	Enhancers_Liver_56092
ENSFDAG00000008072	N.A	Enhancers_Liver_56087
ENSFDAG00000013299	Adora3	Enhancers_Liver_56092
ENSFDAG00000014516	Dennd2d	Enhancers_Liver_56126
ENSFDAG00000002514	Cept1	Enhancers_Liver_56126
ENSFDAG00000014378	Kcna2	Enhancers_Liver_56142,Enhancers_Liver_56146
ENSFDAG00000017324	Cd53	Enhancers_Liver_56142
ENSFDAG00000002356	Kcna10	Enhancers_Liver_56146,Enhancers_Liver_56147
ENSFDAG00000002109	Prok1	Enhancers_Liver_56147
ENSFDAG00000019787	Ahcyl1	Enhancers_Liver_56163,Enhancers_Liver_56166,Enhancers_Liver_56168,Enhancers_Liver_56183
ENSFDAG00000018369	Strip1	Enhancers_Liver_56163,Enhancers_Liver_56166,Enhancers_Liver_56168
ENSFDAG00000009464	Csf1	Enhancers_Liver_56183,Enhancers_Liver_56186,Enhancers_Liver_56197
ENSFDAG00000014538	Eps8l3	Enhancers_Liver_56186,Enhancers_Liver_56197
ENSFDAG00000014025	Gnai3	Enhancers_Liver_56235
ENSFDAG00000005745	Amigo1	Enhancers_Liver_56236,Enhancers_Liver_56239
ENSFDAG00000005530	Gpr61	Enhancers_Liver_56236,Enhancers_Liver_56239
ENSFDAG00000005657	Atxn7l2	Enhancers_Liver_56242
ENSFDAG00000014052	Sort1	Enhancers_Liver_56247
ENSFDAG00000010617	Psma5	Enhancers_Liver_56247
ENSFDAG00000018561	Elapor1	Enhancers_Liver_56266
ENSFDAG00000021349	Sars	Enhancers_Liver_56266
ENSFDAG00000006100	Cfap276	Enhancers_Liver_56266
ENSFDAG00000005382	Gpsm2	Enhancers_Liver_56274
ENSFDAG00000016955	Clcc1	Enhancers_Liver_56274
ENSFDAG00000012530	Stxbp3	Enhancers_Liver_56279,Enhancers_Liver_56282,Enhancers_Liver_56283
ENSFDAG00000021236	Aknad1	Enhancers_Liver_56279,Enhancers_Liver_56282,Enhancers_Liver_56283
ENSFDAG00000012684	Vav3	Enhancers_Liver_56311
ENSFDAG00000013067	Ntng1	Enhancers_Liver_56311
ENSFDAG00000007734	S1pr1	Enhancers_Liver_56369,Enhancers_Liver_56379,Enhancers_Liver_56382
ENSFDAG00000014967	Dph5	Enhancers_Liver_56369,Enhancers_Liver_56379,Enhancers_Liver_56382
ENSFDAG00000016914	Vcam1	Enhancers_Liver_56393,Enhancers_Liver_56394,Enhancers_Liver_56402,Enhancers_Liver_56428,Enhancers_Liver_56429
ENSFDAG00000002202	Extl2	Enhancers_Liver_56393,Enhancers_Liver_56394
ENSFDAG00000014781	Cdc14a	Enhancers_Liver_56402,Enhancers_Liver_56428,Enhancers_Liver_56429
ENSFDAG00000013780	Snx7	Enhancers_Liver_56504
ENSFDAG00000009322	Dpyd	Enhancers_Liver_56504
ENSFDAG00000000325	Ptbp2	Enhancers_Liver_56547
ENSFDAG00000020410	Rwdd3	Enhancers_Liver_56547
ENSFDAG00000002150	N.A	Enhancers_Liver_56579,Enhancers_Liver_56591,Enhancers_Liver_56600
ENSFDAG00000001234	Alg14	Enhancers_Liver_56579,Enhancers_Liver_56591,Enhancers_Liver_56600
ENSFDAG00000007605	Abcd3	Enhancers_Liver_56652
ENSFDAG00000013932	Arhgap29	Enhancers_Liver_56652,Enhancers_Liver_56661
ENSFDAG00000017478	Abca4	Enhancers_Liver_56661
ENSFDAG00000018990	Gclm	Enhancers_Liver_56696
ENSFDAG00000018549	Bcar3	Enhancers_Liver_56724
ENSFDAG00000017057	N.A	Enhancers_Liver_56724,Enhancers_Liver_56727,Enhancers_Liver_56729,Enhancers_Liver_56750,Enhancers_Liver_56759
ENSFDAG00000006482	Fnbp1l	Enhancers_Liver_56727,Enhancers_Liver_56729,Enhancers_Liver_56750,Enhancers_Liver_56759
ENSFDAG00000015998	Synpo2	Enhancers_Liver_56797
ENSFDAG00000011743	Sec24d	Enhancers_Liver_56797,Enhancers_Liver_56806
ENSFDAG00000005916	Mettl14	Enhancers_Liver_56806
ENSFDAG00000016306	Bmper	Enhancers_Liver_84436
ENSFDAG00000018619	Gm49359	Enhancers_Liver_56844
ENSFDAG00000010102	Ank2	Enhancers_Liver_56844
ENSFDAG00000010692	Etnppl	Enhancers_Liver_56955
ENSFDAG00000021475	Ostc	Enhancers_Liver_56955
ENSFDAG00000012673	Tbck	Enhancers_Liver_57022
ENSFDAG00000011692	Npnt	Enhancers_Liver_57022
ENSFDAG00000017864	Ppa2	Enhancers_Liver_57052,Enhancers_Liver_57053,Enhancers_Liver_57059
ENSFDAG00000008686	Chordc1	Enhancers_Liver_57052,Enhancers_Liver_57053,Enhancers_Liver_57059
ENSFDAG00000004377	Slc9b2	Enhancers_Liver_57072
ENSFDAG00000016147	Slc9b1	Enhancers_Liver_57072
ENSFDAG00000014537	Pdlim5	Enhancers_Liver_57283,Enhancers_Liver_57289,Enhancers_Liver_57290
ENSFDAG00000003729	Hpgds	Enhancers_Liver_57289,Enhancers_Liver_57290
ENSFDAG00000010097	Lmo4	Enhancers_Liver_57358
ENSFDAG00000020658	Hs2st1	Enhancers_Liver_57358
ENSFDAG00000021033	N.A	Enhancers_Liver_57414
ENSFDAG00000012243	Ddah1	Enhancers_Liver_57414
ENSFDAG00000018144	Uox	Enhancers_Liver_57465,Enhancers_Liver_57467,Enhancers_Liver_57469,Enhancers_Liver_57470,Enhancers_Liver_57472
ENSFDAG00000008850	4930503B20Rik	Enhancers_Liver_57465,Enhancers_Liver_57467,Enhancers_Liver_57469,Enhancers_Liver_57470,Enhancers_Liver_57472
ENSFDAG00000013667	Samd13	Enhancers_Liver_57485
ENSFDAG00000021390	Prkacb	Enhancers_Liver_57485,Enhancers_Liver_57487
ENSFDAG00000008998	Adgrl2	Enhancers_Liver_57553,Enhancers_Liver_57565,Enhancers_Liver_57566,Enhancers_Liver_57567,Enhancers_Liver_57573,Enhancers_Liver_57590,Enhancers_Liver_57596,Enhancers_Liver_57602,Enhancers_Liver_57610
ENSFDAG00000013900	Usp33	Enhancers_Liver_57667
ENSFDAG00000008419	Zzz3	Enhancers_Liver_57667
ENSFDAG00000004173	Tmem68	Enhancers_Liver_57830
ENSFDAG00000007859	Lyn	Enhancers_Liver_57830
ENSFDAG00000017305	Tox	Enhancers_Liver_57925,Enhancers_Liver_57928,Enhancers_Liver_57934,Enhancers_Liver_57935,Enhancers_Liver_57936,Enhancers_Liver_57937
ENSFDAG00000017330	Nsmaf	Enhancers_Liver_57925,Enhancers_Liver_57928,Enhancers_Liver_57934,Enhancers_Liver_57935,Enhancers_Liver_57936,Enhancers_Liver_57937
ENSFDAG00000000528	Chd7	Enhancers_Liver_57974,Enhancers_Liver_57982,Enhancers_Liver_57990,Enhancers_Liver_57994,Enhancers_Liver_57995,Enhancers_Liver_58005,Enhancers_Liver_58006
ENSFDAG00000019063	Clvs1	Enhancers_Liver_57982,Enhancers_Liver_57990,Enhancers_Liver_57994,Enhancers_Liver_57995,Enhancers_Liver_58005,Enhancers_Liver_58006,Enhancers_Liver_58021
ENSFDAG00000004314	Asph	Enhancers_Liver_58021
ENSFDAG00000011080	Uqcrb	Enhancers_Liver_58031,Enhancers_Liver_58034
ENSFDAG00000015259	Cfap418	Enhancers_Liver_58031,Enhancers_Liver_58034
ENSFDAG00000008679	Ndufaf6	Enhancers_Liver_58055
ENSFDAG00000018976	Cdh17	Enhancers_Liver_58119
ENSFDAG00000010238	Pdp1	Enhancers_Liver_58119,Enhancers_Liver_58125
ENSFDAG00000019945	Tmem67	Enhancers_Liver_58125
ENSFDAG00000007370	Runx1t1	Enhancers_Liver_58159
ENSFDAG00000019510	Slc26a7	Enhancers_Liver_58159
ENSFDAG00000020335	Necab1	Enhancers_Liver_58202
ENSFDAG00000013069	Tmem64	Enhancers_Liver_58202
ENSFDAG00000012136	Cpne3	Enhancers_Liver_58236
ENSFDAG00000015619	Cngb3	Enhancers_Liver_58236
ENSFDAG00000002571	Map3k7	Enhancers_Liver_58335
ENSFDAG00000001423	Bach2	Enhancers_Liver_58335
ENSFDAG00000018650	Eqtn	Enhancers_Liver_58412,Enhancers_Liver_60146
ENSFDAG00000010610	Mob3b	Enhancers_Liver_58412
ENSFDAG00000008650	C9orf72	Enhancers_Liver_58444,Enhancers_Liver_58453
ENSFDAG00000000672	Smu1	Enhancers_Liver_58506
ENSFDAG00000013185	B4galt1	Enhancers_Liver_58506
ENSFDAG00000012320	Nfx1	Enhancers_Liver_58528
ENSFDAG00000017025	Aqp7	Enhancers_Liver_58528
ENSFDAG00000018848	Atp8b5	Enhancers_Liver_58617
ENSFDAG00000010870	Rusc2	Enhancers_Liver_58617
ENSFDAG00000010552	N.A	Enhancers_Liver_58745,Enhancers_Liver_58746
ENSFDAG00000017403	Igfbpl1	Enhancers_Liver_58745,Enhancers_Liver_58746
ENSFDAG00000013228	Tmod1	Enhancers_Liver_58767
ENSFDAG00000013906	Tstd2	Enhancers_Liver_58767
ENSFDAG00000010259	Col15a1	Enhancers_Liver_58835,Enhancers_Liver_58838,Enhancers_Liver_58845
ENSFDAG00000000069	Tgfbr1	Enhancers_Liver_58835,Enhancers_Liver_58838,Enhancers_Liver_58845
ENSFDAG00000014814	Nr4a3	Enhancers_Liver_58869
ENSFDAG00000015709	Gm10320	Enhancers_Liver_58869
ENSFDAG00000003921	Invs	Enhancers_Liver_86094
ENSFDAG00000007721	Tex10	Enhancers_Liver_86094
ENSFDAG00000000159	Grin3a	Enhancers_Liver_58951
ENSFDAG00000020040	Srp72	Enhancers_Liver_58951
ENSFDAG00000016214	Abca1	Enhancers_Liver_58969
ENSFDAG00000014845	Nipsnap3a	Enhancers_Liver_58969
ENSFDAG00000009170	Slc44a1	Enhancers_Liver_59050
ENSFDAG00000019272	Fsd1l	Enhancers_Liver_59050
ENSFDAG00000006703	Zfp462	Enhancers_Liver_59100
ENSFDAG00000006791	Rad23b	Enhancers_Liver_59100
ENSFDAG00000010886	Klf4	Enhancers_Liver_59137,Enhancers_Liver_59139
ENSFDAG00000005445	Elp1	Enhancers_Liver_59137,Enhancers_Liver_59139
ENSFDAG00000011604	Pakap	Enhancers_Liver_59220,Enhancers_Liver_59229
ENSFDAG00000003824	Pakap	Enhancers_Liver_59220,Enhancers_Liver_59229,Enhancers_Liver_59266
ENSFDAG00000010942	D630039A03Rik	Enhancers_Liver_59266
ENSFDAG00000013311	Txn1	Enhancers_Liver_59275
ENSFDAG00000015243	Txndc8	Enhancers_Liver_59275
ENSFDAG00000016966	Ptbp3	Enhancers_Liver_59343
ENSFDAG00000016188	Hsdl2	Enhancers_Liver_59343,Enhancers_Liver_59348
ENSFDAG00000009698	E130308A19Rik	Enhancers_Liver_59348
ENSFDAG00000017100	Slc31a2	Enhancers_Liver_59470,Enhancers_Liver_59471
ENSFDAG00000006445	Rbm46	Enhancers_Liver_59470,Enhancers_Liver_59471
ENSFDAG00000009454	Slc31a1	Enhancers_Liver_59477
ENSFDAG00000010789	Fkbp15	Enhancers_Liver_59486
ENSFDAG00000015449	Cdc26	Enhancers_Liver_59486
ENSFDAG00000015440	Tnfsf15	Enhancers_Liver_59584
ENSFDAG00000019465	Tnc	Enhancers_Liver_59591
ENSFDAG00000009506	Rnf2	Enhancers_Liver_59591
ENSFDAG00000018715	Lurap1l	Enhancers_Liver_59827,Enhancers_Liver_59828
ENSFDAG00000011171	Mpdz	Enhancers_Liver_59827,Enhancers_Liver_59828,Enhancers_Liver_59882,Enhancers_Liver_59896,Enhancers_Liver_59902,Enhancers_Liver_59905,Enhancers_Liver_59911,Enhancers_Liver_59922
ENSFDAG00000012167	Nfib	Enhancers_Liver_59882,Enhancers_Liver_59896,Enhancers_Liver_59902,Enhancers_Liver_59905,Enhancers_Liver_59911,Enhancers_Liver_59922
ENSFDAG00000007041	Psip1	Enhancers_Liver_59987
ENSFDAG00000016205	Snapc3	Enhancers_Liver_59987
ENSFDAG00000011232	Cntln	Enhancers_Liver_73712
ENSFDAG00000013868	Sh3gl2	Enhancers_Liver_73712
ENSFDAG00000015150	Slc24a2	Enhancers_Liver_60067
ENSFDAG00000019133	Mllt3	Enhancers_Liver_60067
ENSFDAG00000012493	N.A	Enhancers_Liver_60119
ENSFDAG00000012849	Tek	Enhancers_Liver_60146
ENSFDAG00000017497	Jun	Enhancers_Liver_60178,Enhancers_Liver_60212
ENSFDAG00000017146	Fggy	Enhancers_Liver_60178,Enhancers_Liver_60212,Enhancers_Liver_60254
ENSFDAG00000014384	Hook1	Enhancers_Liver_60254
ENSFDAG00000013392	Gm12695	Enhancers_Liver_60298
ENSFDAG00000011281	Nfia	Enhancers_Liver_60298,Enhancers_Liver_60337,Enhancers_Liver_60410
ENSFDAG00000019886	Tm2d1	Enhancers_Liver_60337,Enhancers_Liver_60410
ENSFDAG00000014176	Pgm1	Enhancers_Liver_60461
ENSFDAG00000005892	Ror1	Enhancers_Liver_60461,Enhancers_Liver_60484
ENSFDAG00000005398	Cachd1	Enhancers_Liver_60484
ENSFDAG00000013294	Dnajc6	Enhancers_Liver_60557
ENSFDAG00000014769	Leprot	Enhancers_Liver_60557
ENSFDAG00000019159	Pde4b	Enhancers_Liver_60607
ENSFDAG00000003429	Sgip1	Enhancers_Liver_60607
ENSFDAG00000014923	Plpp3	Enhancers_Liver_60741,Enhancers_Liver_60746
ENSFDAG00000011399	Aida	Enhancers_Liver_60830,Enhancers_Liver_60831,Enhancers_Liver_60852
ENSFDAG00000008899	Usp24	Enhancers_Liver_60830,Enhancers_Liver_60831,Enhancers_Liver_60852
ENSFDAG00000010115	Eps15	Enhancers_Liver_61087
ENSFDAG00000014600	Ttc39a	Enhancers_Liver_61087
ENSFDAG00000000374	N.A	Enhancers_Liver_61241
ENSFDAG00000006312	P3r3urf	Enhancers_Liver_61265
ENSFDAG00000001070	Tie1	Enhancers_Liver_61465
ENSFDAG00000006919	2610528J11Rik	Enhancers_Liver_61465
ENSFDAG00000018862	N.A	Enhancers_Liver_61472
ENSFDAG00000019220	N.A	Enhancers_Liver_61472
ENSFDAG00000014461	AU022252	Enhancers_Liver_61488
ENSFDAG00000007690	P3h1	Enhancers_Liver_61488
ENSFDAG00000006321	Cldn19	Enhancers_Liver_61494
ENSFDAG00000003679	Ybx1	Enhancers_Liver_61494
ENSFDAG00000014487	Ppcs	Enhancers_Liver_61501
ENSFDAG00000012838	Ccdc30	Enhancers_Liver_61501
ENSFDAG00000009287	Zmynd12	Enhancers_Liver_61501
ENSFDAG00000001346	Guca2b	Enhancers_Liver_61517,Enhancers_Liver_61518
ENSFDAG00000002380	Hivep3	Enhancers_Liver_61517,Enhancers_Liver_61518
ENSFDAG00000021447	N.A	Enhancers_Liver_61584
ENSFDAG00000016756	Zfp292	Enhancers_Liver_61584
ENSFDAG00000012669	Sh3d21	Enhancers_Liver_61746,Enhancers_Liver_61752
ENSFDAG00000006853	Stk40	Enhancers_Liver_61746,Enhancers_Liver_61752
ENSFDAG00000008383	Hdac1	Enhancers_Liver_61917
ENSFDAG00000014848	Lck	Enhancers_Liver_61917
ENSFDAG00000015546	Mecr	Enhancers_Liver_62018
ENSFDAG00000007332	Srsf4	Enhancers_Liver_62018
ENSFDAG00000017748	Epb41	Enhancers_Liver_62054,Enhancers_Liver_62056
ENSFDAG00000014178	Oprd1	Enhancers_Liver_62054,Enhancers_Liver_62056
ENSFDAG00000020458	Rcc1	Enhancers_Liver_62074
ENSFDAG00000013473	N.A	Enhancers_Liver_62074
ENSFDAG00000012917	Gnpnat1	Enhancers_Liver_62122
ENSFDAG00000015406	Rbak	Enhancers_Liver_62122
ENSFDAG00000019590	Fgr	Enhancers_Liver_62134
ENSFDAG00000009237	Ahdc1	Enhancers_Liver_62174,Enhancers_Liver_62182
ENSFDAG00000018478	Wasf2	Enhancers_Liver_62174,Enhancers_Liver_62182
ENSFDAG00000015960	Tmem222	Enhancers_Liver_62197
ENSFDAG00000018953	Wdtc1	Enhancers_Liver_62197
ENSFDAG00000003876	Pdik1l	Enhancers_Liver_62266
ENSFDAG00000008754	Trim63	Enhancers_Liver_62266
ENSFDAG00000013925	Pafah2	Enhancers_Liver_62278
ENSFDAG00000009067	Stmn1	Enhancers_Liver_62278
ENSFDAG00000008912	Aunip	Enhancers_Liver_62285
ENSFDAG00000016908	Cda	Enhancers_Liver_62571,Enhancers_Liver_62572
ENSFDAG00000021178	Pink1	Enhancers_Liver_62571,Enhancers_Liver_62572
ENSFDAG00000014107	Tmco4	Enhancers_Liver_62598,Enhancers_Liver_62600
ENSFDAG00000017700	Htr6	Enhancers_Liver_62598,Enhancers_Liver_62600
ENSFDAG00000008678	Padi2	Enhancers_Liver_62744
ENSFDAG00000014397	Sdhb	Enhancers_Liver_62744
ENSFDAG00000010220	Necap2	Enhancers_Liver_62759
ENSFDAG00000010337	Szrd1	Enhancers_Liver_62759
ENSFDAG00000010644	Arhgef5	Enhancers_Liver_70165
ENSFDAG00000020036	Nobox	Enhancers_Liver_70173
ENSFDAG00000001083	Casp9	Enhancers_Liver_62839
ENSFDAG00000008555	Cela2a	Enhancers_Liver_62839
ENSFDAG00000020193	Dhrs3	Enhancers_Liver_62950,Enhancers_Liver_62959
ENSFDAG00000008635	Vps13d	Enhancers_Liver_62950,Enhancers_Liver_62959
ENSFDAG00000007598	Tnfrsf1b	Enhancers_Liver_62968,Enhancers_Liver_62974
ENSFDAG00000010117	Tnfrsf8	Enhancers_Liver_62974
ENSFDAG00000007143	2510039O18Rik	Enhancers_Liver_62997
ENSFDAG00000013861	Plod1	Enhancers_Liver_62997
ENSFDAG00000009403	Angptl7	Enhancers_Liver_63036
ENSFDAG00000005444	Mtor	Enhancers_Liver_63036
ENSFDAG00000018732	Spsb1	Enhancers_Liver_63153
ENSFDAG00000006712	H6pd	Enhancers_Liver_63153
ENSFDAG00000008164	Eno1	Enhancers_Liver_63178,Enhancers_Liver_63179
ENSFDAG00000006114	Rere	Enhancers_Liver_63195,Enhancers_Liver_63201,Enhancers_Liver_63240
ENSFDAG00000019137	Slc45a1	Enhancers_Liver_63195,Enhancers_Liver_63201,Enhancers_Liver_63240
ENSFDAG00000010494	Atp1b3	Enhancers_Liver_87612
ENSFDAG00000012209	Rnf7l	Enhancers_Liver_87612
ENSFDAG00000018047	Magi2	Enhancers_Liver_63770
ENSFDAG00000012073	Lhfpl3	Enhancers_Liver_63852
ENSFDAG00000007652	Kmt2e	Enhancers_Liver_63852
ENSFDAG00000013758	Srpk2	Enhancers_Liver_63880
ENSFDAG00000016064	Pus7	Enhancers_Liver_63880
ENSFDAG00000007934	Selenoi	Enhancers_Liver_64058
ENSFDAG00000012172	Drc1	Enhancers_Liver_64058
ENSFDAG00000014100	Cib4	Enhancers_Liver_64071
ENSFDAG00000015782	Fam166c	Enhancers_Liver_64071
ENSFDAG00000007160	Dpysl5	Enhancers_Liver_64102,Enhancers_Liver_64106
ENSFDAG00000020949	Mapre3	Enhancers_Liver_64102,Enhancers_Liver_64106
ENSFDAG00000008924	Mrpl33	Enhancers_Liver_64150
ENSFDAG00000005895	Slc4a1ap	Enhancers_Liver_64150
ENSFDAG00000008269	Fosl2	Enhancers_Liver_64177,Enhancers_Liver_64222
ENSFDAG00000020479	Babam2	Enhancers_Liver_64177
ENSFDAG00000012212	Plb1	Enhancers_Liver_64222
ENSFDAG00000018048	N.A	Enhancers_Liver_64259
ENSFDAG00000018318	Tapt1	Enhancers_Liver_64611
ENSFDAG00000007867	Ldb2	Enhancers_Liver_64611
ENSFDAG00000014441	N.A	Enhancers_Liver_64762,Enhancers_Liver_64764,Enhancers_Liver_64775,Enhancers_Liver_64782,Enhancers_Liver_64783
ENSFDAG00000005659	Ppargc1a	Enhancers_Liver_64762,Enhancers_Liver_64764,Enhancers_Liver_64775,Enhancers_Liver_64782,Enhancers_Liver_64783
ENSFDAG00000008219	Arap2	Enhancers_Liver_64962
ENSFDAG00000000470	Dthd1	Enhancers_Liver_64980,Enhancers_Liver_64983,Enhancers_Liver_64985
ENSFDAG00000007672	Nwd2	Enhancers_Liver_64980,Enhancers_Liver_64983,Enhancers_Liver_64985
ENSFDAG00000018875	Tbc1d1	Enhancers_Liver_65023,Enhancers_Liver_65050,Enhancers_Liver_65051,Enhancers_Liver_65054,Enhancers_Liver_65058,Enhancers_Liver_65062,Enhancers_Liver_65075,Enhancers_Liver_65098
ENSFDAG00000009389	Klf3	Enhancers_Liver_65023,Enhancers_Liver_65050,Enhancers_Liver_65051,Enhancers_Liver_65054,Enhancers_Liver_65058,Enhancers_Liver_65062,Enhancers_Liver_65075,Enhancers_Liver_65098,Enhancers_Liver_65127
ENSFDAG00000018555	Tlr1	Enhancers_Liver_65127,Enhancers_Liver_65138
ENSFDAG00000013296	Fam114a1	Enhancers_Liver_65138
ENSFDAG00000020853	Tmem156	Enhancers_Liver_65161
ENSFDAG00000015136	Klhl5	Enhancers_Liver_65161
ENSFDAG00000006469	Rfc1	Enhancers_Liver_65180
ENSFDAG00000021171	Klb	Enhancers_Liver_65180,Enhancers_Liver_65184
ENSFDAG00000013998	N.A	Enhancers_Liver_65184
ENSFDAG00000005739	Rhoh	Enhancers_Liver_65218
ENSFDAG00000011236	Chrna9	Enhancers_Liver_65218
ENSFDAG00000016326	Rbm47	Enhancers_Liver_65256
ENSFDAG00000013614	Nsun7	Enhancers_Liver_65256
ENSFDAG00000015596	Txk	Enhancers_Liver_65460,Enhancers_Liver_65462
ENSFDAG00000018641	N.A	Enhancers_Liver_65460,Enhancers_Liver_65462
ENSFDAG00000021281	Ociad1	Enhancers_Liver_65491
ENSFDAG00000021036	Ociad2	Enhancers_Liver_65491,Enhancers_Liver_65499
ENSFDAG00000014598	Cwh43	Enhancers_Liver_65499
ENSFDAG00000003278	Rasl11b	Enhancers_Liver_65559
ENSFDAG00000016877	Scfd2	Enhancers_Liver_65559
ENSFDAG00000021456	Lnx1	Enhancers_Liver_65604,Enhancers_Liver_65607,Enhancers_Liver_65610
ENSFDAG00000014043	Chic2	Enhancers_Liver_65604,Enhancers_Liver_65607,Enhancers_Liver_65610,Enhancers_Liver_65615
[truncated: 763 more rows]

## Sheet: Enhancers Heart UP genes all
Ensembl gene id (Fdam)	Gene name	Enhancers Heart UP
ENSFDAG00000007654	Rp1	Enhancers_Heart_18,Enhancers_Heart_6
ENSFDAG00000004666	Rplp2	Enhancers_Heart_18,Enhancers_Heart_6
ENSFDAG00000007428	Rb1cc1	Enhancers_Heart_29
ENSFDAG00000008405	Pcmtd1	Enhancers_Heart_33,Enhancers_Heart_36
ENSFDAG00000011058	Vxn	Enhancers_Heart_51
ENSFDAG00000011008	Mybl1	Enhancers_Heart_51
ENSFDAG00000012448	Cpa6	Enhancers_Heart_65
ENSFDAG00000002353	Prex2	Enhancers_Heart_65
ENSFDAG00000021066	Sulf1	Enhancers_Heart_104,Enhancers_Heart_129
ENSFDAG00000008840	Slco5a1	Enhancers_Heart_104,Enhancers_Heart_129
ENSFDAG00000011360	Il17a	Enhancers_Heart_202
ENSFDAG00000017087	Pkhd1	Enhancers_Heart_202
ENSFDAG00000010305	Efhc1	Enhancers_Heart_207
ENSFDAG00000013636	Tram2	Enhancers_Heart_207
ENSFDAG00000013095	Rims1	Enhancers_Heart_261,Enhancers_Heart_271,Enhancers_Heart_277
ENSFDAG00000015587	Ogfrl1	Enhancers_Heart_261,Enhancers_Heart_271,Enhancers_Heart_277,Enhancers_Heart_285
ENSFDAG00000019086	B3gat2	Enhancers_Heart_285
ENSFDAG00000010604	Ptp4a1	Enhancers_Heart_313,Enhancers_Heart_316,Enhancers_Heart_324
ENSFDAG00000008941	Khdrbs2	Enhancers_Heart_313,Enhancers_Heart_316,Enhancers_Heart_324,Enhancers_Heart_342
ENSFDAG00000012560	Prim2	Enhancers_Heart_342,Enhancers_Heart_353
ENSFDAG00000021441	Adamtsl4	Enhancers_Heart_434
ENSFDAG00000006985	Ensa	Enhancers_Heart_434
ENSFDAG00000002770	Hs6st1	Enhancers_Heart_467
ENSFDAG00000018897	Uggt1	Enhancers_Heart_467
ENSFDAG00000013797	Npas2	Enhancers_Heart_641,Enhancers_Heart_642,Enhancers_Heart_643,Enhancers_Heart_644,Enhancers_Heart_652
ENSFDAG00000010515	Pdcl3	Enhancers_Heart_641,Enhancers_Heart_642,Enhancers_Heart_643,Enhancers_Heart_644,Enhancers_Heart_652
ENSFDAG00000010208	N.A	Enhancers_Heart_684
ENSFDAG00000005643	Tbc1d8	Enhancers_Heart_684
ENSFDAG00000005275	Rfx8	Enhancers_Heart_731
ENSFDAG00000007551	Map4k4	Enhancers_Heart_731
ENSFDAG00000015180	Il1r2	Enhancers_Heart_777
ENSFDAG00000003335	Il1r1	Enhancers_Heart_777
ENSFDAG00000004645	Mrps9	Enhancers_Heart_829
ENSFDAG00000018413	Tgfbrap1	Enhancers_Heart_829
ENSFDAG00000020344	Mettl21e	Enhancers_Heart_85780,Enhancers_Heart_85782,Enhancers_Heart_910
ENSFDAG00000005041	Slc10a2	Enhancers_Heart_85780,Enhancers_Heart_85782
ENSFDAG00000006173	Rab15	Enhancers_Heart_915
ENSFDAG00000008501	Gulp1	Enhancers_Heart_915
ENSFDAG00000007584	Nabp1	Enhancers_Heart_1078,Enhancers_Heart_1087
ENSFDAG00000008289	Myo1b	Enhancers_Heart_1078,Enhancers_Heart_1087
ENSFDAG00000012945	Gls	Enhancers_Heart_1134
ENSFDAG00000009958	Nab1	Enhancers_Heart_1134
ENSFDAG00000012252	Nemp2	Enhancers_Heart_1155,Enhancers_Heart_1160
ENSFDAG00000010146	Mfsd6	Enhancers_Heart_1155,Enhancers_Heart_1160,Enhancers_Heart_1171
ENSFDAG00000007051	Inpp1	Enhancers_Heart_1171
ENSFDAG00000009025	Pgap1	Enhancers_Heart_1249,Enhancers_Heart_1274
ENSFDAG00000011677	Ankrd44	Enhancers_Heart_1249,Enhancers_Heart_1274,Enhancers_Heart_1290,Enhancers_Heart_1294
ENSFDAG00000017510	Sf3b1	Enhancers_Heart_1290,Enhancers_Heart_1294
ENSFDAG00000012635	Mars2	Enhancers_Heart_1317,Enhancers_Heart_1318
ENSFDAG00000013036	Boll	Enhancers_Heart_1317,Enhancers_Heart_1318,Enhancers_Heart_1319,Enhancers_Heart_1324,Enhancers_Heart_1327
ENSFDAG00000008461	Plcl1	Enhancers_Heart_1319,Enhancers_Heart_1324,Enhancers_Heart_1327
ENSFDAG00000008313	Xdh	Enhancers_Heart_42152,Enhancers_Heart_42158,Enhancers_Heart_42159,Enhancers_Heart_42160,Enhancers_Heart_42161,Enhancers_Heart_42163,Enhancers_Heart_42190
ENSFDAG00000017946	Ehd3	Enhancers_Heart_42152,Enhancers_Heart_42158,Enhancers_Heart_42159,Enhancers_Heart_42160,Enhancers_Heart_42161,Enhancers_Heart_42163
ENSFDAG00000015838	Wdr12	Enhancers_Heart_1491
ENSFDAG00000005714	Ica1l	Enhancers_Heart_1491
ENSFDAG00000007588	Icos	Enhancers_Heart_1581
ENSFDAG00000013977	S100a10	Enhancers_Heart_1607
ENSFDAG00000020895	Pard3b	Enhancers_Heart_1607,Enhancers_Heart_1615,Enhancers_Heart_1639
ENSFDAG00000007633	Nrp2	Enhancers_Heart_1615,Enhancers_Heart_1639,Enhancers_Heart_1673,Enhancers_Heart_1677,Enhancers_Heart_1678
ENSFDAG00000012715	Ino80d	Enhancers_Heart_1673,Enhancers_Heart_1677,Enhancers_Heart_1678
ENSFDAG00000007436	Klf7	Enhancers_Heart_1687,Enhancers_Heart_1750
ENSFDAG00000003815	Fastkd2	Enhancers_Heart_1687
ENSFDAG00000009173	Ldha	Enhancers_Heart_1750
ENSFDAG00000008784	Ccnyl1	Enhancers_Heart_1775,Enhancers_Heart_1787,Enhancers_Heart_1789,Enhancers_Heart_1792,Enhancers_Heart_1795,Enhancers_Heart_1796,Enhancers_Heart_1803,Enhancers_Heart_1804,Enhancers_Heart_1821,Enhancers_Heart_1822,Enhancers_Heart_1830,Enhancers_Heart_1834
ENSFDAG00000012647	Plekhm3	Enhancers_Heart_1775,Enhancers_Heart_1787,Enhancers_Heart_1789,Enhancers_Heart_1792,Enhancers_Heart_1795,Enhancers_Heart_1796,Enhancers_Heart_1803,Enhancers_Heart_1804,Enhancers_Heart_1821,Enhancers_Heart_1822,Enhancers_Heart_1830,Enhancers_Heart_1834
ENSFDAG00000016959	Erbb4	Enhancers_Heart_1877
ENSFDAG00000010688	Ikzf2	Enhancers_Heart_1877
ENSFDAG00000004638	Rpl37a	Enhancers_Heart_1940,Enhancers_Heart_1941
ENSFDAG00000010390	Igfbp2	Enhancers_Heart_1940,Enhancers_Heart_1941
ENSFDAG00000004499	Igfbp5	Enhancers_Heart_1967
ENSFDAG00000005119	N.A	Enhancers_Heart_1967,Enhancers_Heart_2022,Enhancers_Heart_2024,Enhancers_Heart_2030
ENSFDAG00000002175	Tns1	Enhancers_Heart_2022,Enhancers_Heart_2024,Enhancers_Heart_2030,Enhancers_Heart_2083
ENSFDAG00000004104	Rufy4	Enhancers_Heart_2083
ENSFDAG00000015149	Fev	Enhancers_Heart_2149,Enhancers_Heart_2150,Enhancers_Heart_2151
ENSFDAG00000010263	Wnt10a	Enhancers_Heart_2149,Enhancers_Heart_2150,Enhancers_Heart_2151
ENSFDAG00000013400	Gmppa	Enhancers_Heart_2186
ENSFDAG00000017636	Speg	Enhancers_Heart_2186
ENSFDAG00000000733	Slc4a3	Enhancers_Heart_2210,Enhancers_Heart_2211,Enhancers_Heart_2212,Enhancers_Heart_2250,Enhancers_Heart_2255,Enhancers_Heart_2264
ENSFDAG00000009308	Stk11ip	Enhancers_Heart_2210,Enhancers_Heart_2211,Enhancers_Heart_2212
ENSFDAG00000007737	Epha4	Enhancers_Heart_2264,Enhancers_Heart_2274,Enhancers_Heart_2294,Enhancers_Heart_2300,Enhancers_Heart_2301,Enhancers_Heart_2306,Enhancers_Heart_2307,Enhancers_Heart_2309,Enhancers_Heart_2310
ENSFDAG00000019521	Pax3	Enhancers_Heart_2306,Enhancers_Heart_2307,Enhancers_Heart_2309,Enhancers_Heart_2310
ENSFDAG00000020371	Nyap2	Enhancers_Heart_2407,Enhancers_Heart_2411,Enhancers_Heart_2418,Enhancers_Heart_2423
ENSFDAG00000018637	Irs1	Enhancers_Heart_2407,Enhancers_Heart_2411,Enhancers_Heart_2418,Enhancers_Heart_2423
ENSFDAG00000008947	Cab39	Enhancers_Heart_2558
ENSFDAG00000015687	Itm2c	Enhancers_Heart_2558
ENSFDAG00000009439	Armc9	Enhancers_Heart_2576
ENSFDAG00000018131	B3gnt7	Enhancers_Heart_2576
ENSFDAG00000010358	Ecel1	Enhancers_Heart_2628
ENSFDAG00000007583	Prss56	Enhancers_Heart_2628
ENSFDAG00000021457	Neu2	Enhancers_Heart_2645
ENSFDAG00000006555	Atg16l1	Enhancers_Heart_2660
ENSFDAG00000019347	Inpp5d	Enhancers_Heart_2660
ENSFDAG00000007573	Spp2	Enhancers_Heart_2709
ENSFDAG00000000777	Arl4c	Enhancers_Heart_2709
ENSFDAG00000010051	Sh3bp4	Enhancers_Heart_2778
ENSFDAG00000011571	Tpx2	Enhancers_Heart_2778
ENSFDAG00000021274	Tpx2	Enhancers_Heart_2783
ENSFDAG00000021057	Agap1	Enhancers_Heart_2783,Enhancers_Heart_2826,Enhancers_Heart_2834
ENSFDAG00000009260	Asb18	Enhancers_Heart_2826,Enhancers_Heart_2834,Enhancers_Heart_2856
ENSFDAG00000021451	Iqca	Enhancers_Heart_2856
ENSFDAG00000013194	Ackr3	Enhancers_Heart_2893,Enhancers_Heart_2911
ENSFDAG00000010696	Cops8	Enhancers_Heart_2893,Enhancers_Heart_2911
ENSFDAG00000020364	Hdac4	Enhancers_Heart_3083
ENSFDAG00000012910	Ndufa10	Enhancers_Heart_3083
ENSFDAG00000017896	Ppp1r7	Enhancers_Heart_3195
ENSFDAG00000000456	Hdlbp	Enhancers_Heart_3195
ENSFDAG00000000544	Fam174a	Enhancers_Heart_3235
ENSFDAG00000017166	St8sia4	Enhancers_Heart_3235
ENSFDAG00000019103	Macir	Enhancers_Heart_3248,Enhancers_Heart_3251
ENSFDAG00000008145	Pdzph1	Enhancers_Heart_3248,Enhancers_Heart_3251,Enhancers_Heart_41557
ENSFDAG00000002278	Pam	Enhancers_Heart_3281
ENSFDAG00000015605	Slco6c1	Enhancers_Heart_3281
ENSFDAG00000011556	Phlpp1	Enhancers_Heart_3385,Enhancers_Heart_3391
ENSFDAG00000005265	Kdsr	Enhancers_Heart_3385,Enhancers_Heart_3391
ENSFDAG00000012302	Tsn	Enhancers_Heart_3446
ENSFDAG00000021146	Nifk	Enhancers_Heart_3446
ENSFDAG00000012545	Gli2	Enhancers_Heart_3513,Enhancers_Heart_3524
ENSFDAG00000017432	Inhbb	Enhancers_Heart_3513,Enhancers_Heart_3524
ENSFDAG00000008393	Ralb	Enhancers_Heart_3530,Enhancers_Heart_3548,Enhancers_Heart_3549,Enhancers_Heart_3550
ENSFDAG00000011220	Epb41l5	Enhancers_Heart_3548,Enhancers_Heart_3549,Enhancers_Heart_3550
ENSFDAG00000011629	Nckap5	Enhancers_Heart_3639,Enhancers_Heart_3640,Enhancers_Heart_3647,Enhancers_Heart_3660,Enhancers_Heart_3661,Enhancers_Heart_3666
ENSFDAG00000018627	Mgat5	Enhancers_Heart_3639,Enhancers_Heart_3640,Enhancers_Heart_3647,Enhancers_Heart_3660,Enhancers_Heart_3661,Enhancers_Heart_3666,Enhancers_Heart_3716,Enhancers_Heart_3719,Enhancers_Heart_3720,Enhancers_Heart_3721
ENSFDAG00000016536	Acmsd	Enhancers_Heart_3716,Enhancers_Heart_3719,Enhancers_Heart_3720,Enhancers_Heart_3721
ENSFDAG00000001286	Pfkfb2	Enhancers_Heart_3771,Enhancers_Heart_3774
ENSFDAG00000009889	C4bp	Enhancers_Heart_3771,Enhancers_Heart_3774
ENSFDAG00000011883	Yod1	Enhancers_Heart_3774
ENSFDAG00000016977	Pigr	Enhancers_Heart_3778
ENSFDAG00000016034	Il24	Enhancers_Heart_3778
ENSFDAG00000011584	Mapkapk2	Enhancers_Heart_3799,Enhancers_Heart_3809
ENSFDAG00000011230	Il10	Enhancers_Heart_3799
ENSFDAG00000011321	Rassf5	Enhancers_Heart_3831,Enhancers_Heart_3838,Enhancers_Heart_3839,Enhancers_Heart_3841
ENSFDAG00000011373	Eif2d	Enhancers_Heart_3831
ENSFDAG00000011294	Ikbke	Enhancers_Heart_3838,Enhancers_Heart_3839,Enhancers_Heart_3841
ENSFDAG00000013025	Srgap2	Enhancers_Heart_3849,Enhancers_Heart_3852,Enhancers_Heart_3861,Enhancers_Heart_3872,Enhancers_Heart_3877
ENSFDAG00000005088	Fam72a	Enhancers_Heart_3849,Enhancers_Heart_3852,Enhancers_Heart_3861,Enhancers_Heart_3872,Enhancers_Heart_3877,Enhancers_Heart_3891
ENSFDAG00000010671	Avpr1b	Enhancers_Heart_3891
ENSFDAG00000003503	Slc26a9	Enhancers_Heart_3907
ENSFDAG00000006157	Pm20d1	Enhancers_Heart_3907
ENSFDAG00000007139	Slc41a1	Enhancers_Heart_3919
ENSFDAG00000021550	Rab29	Enhancers_Heart_3919
ENSFDAG00000000222	Slc45a3	Enhancers_Heart_3934,Enhancers_Heart_3935,Enhancers_Heart_3937
ENSFDAG00000009288	Nucks1	Enhancers_Heart_3934,Enhancers_Heart_3935
ENSFDAG00000019449	Elk4	Enhancers_Heart_3937,Enhancers_Heart_3947
ENSFDAG00000013581	Mfsd4a	Enhancers_Heart_3947
ENSFDAG00000011410	Nfasc	Enhancers_Heart_4021
ENSFDAG00000014220	N.A	Enhancers_Heart_4021
ENSFDAG00000008729	Pik3c2b	Enhancers_Heart_4040
ENSFDAG00000013068	Ppp1r15b	Enhancers_Heart_4040
ENSFDAG00000004146	Plekha6	Enhancers_Heart_4074
ENSFDAG00000014047	Golt1a	Enhancers_Heart_4074,Enhancers_Heart_4076
ENSFDAG00000006296	Ren1	Enhancers_Heart_4076
ENSFDAG00000020806	Sox13	Enhancers_Heart_4098
ENSFDAG00000009037	Snrpe	Enhancers_Heart_4098
ENSFDAG00000009899	Atp6v1g3	Enhancers_Heart_4472
ENSFDAG00000017702	Nek7	Enhancers_Heart_4472
ENSFDAG00000001733	Bfar	Enhancers_Heart_4488,Enhancers_Heart_4489
ENSFDAG00000016591	Lhx9	Enhancers_Heart_4488,Enhancers_Heart_4489
ENSFDAG00000010904	Zbtb41	Enhancers_Heart_4512,Enhancers_Heart_4513
ENSFDAG00000010908	F13b	Enhancers_Heart_4512,Enhancers_Heart_4513
ENSFDAG00000006188	B3galt2	Enhancers_Heart_4534,Enhancers_Heart_4540
ENSFDAG00000015830	Cdc73	Enhancers_Heart_4534,Enhancers_Heart_4540
ENSFDAG00000015923	Ro60	Enhancers_Heart_4560
ENSFDAG00000006139	Rgs2	Enhancers_Heart_4560
ENSFDAG00000002570	Mfap3l	Enhancers_Heart_87388,Enhancers_Heart_87390
ENSFDAG00000011676	Hpf1	Enhancers_Heart_87388,Enhancers_Heart_87390,Enhancers_Heart_87414
ENSFDAG00000003030	Pla2g4a	Enhancers_Heart_4593
ENSFDAG00000013137	Ptgs2	Enhancers_Heart_4593
ENSFDAG00000012588	Hmcn1	Enhancers_Heart_4619
ENSFDAG00000004285	1700025G04Rik	Enhancers_Heart_4751,Enhancers_Heart_4752
ENSFDAG00000013864	Edem3	Enhancers_Heart_4751,Enhancers_Heart_4752
ENSFDAG00000011390	Tsen15	Enhancers_Heart_4769,Enhancers_Heart_4776
ENSFDAG00000008645	Colgalt2	Enhancers_Heart_4776
ENSFDAG00000007373	Lamc2	Enhancers_Heart_4887,Enhancers_Heart_4888
ENSFDAG00000015916	Nmnat2	Enhancers_Heart_4887,Enhancers_Heart_4888
ENSFDAG00000006642	Acbd6	Enhancers_Heart_5115
ENSFDAG00000001775	Xpr1	Enhancers_Heart_5115
ENSFDAG00000009150	Ralgps2	Enhancers_Heart_5177
ENSFDAG00000006864	Tex35	Enhancers_Heart_5177,Enhancers_Heart_5195,Enhancers_Heart_5201,Enhancers_Heart_5202
ENSFDAG00000016960	Rasal2	Enhancers_Heart_5195,Enhancers_Heart_5201,Enhancers_Heart_5202
ENSFDAG00000014708	Garem2	Enhancers_Heart_5194
ENSFDAG00000007925	Rab10	Enhancers_Heart_5194
ENSFDAG00000009614	Sec16b	Enhancers_Heart_5234
ENSFDAG00000012970	Brinp2	Enhancers_Heart_5234
ENSFDAG00000006162	Tnr	Enhancers_Heart_5272,Enhancers_Heart_5274,Enhancers_Heart_5276,Enhancers_Heart_5298
ENSFDAG00000018308	Cop1	Enhancers_Heart_5272,Enhancers_Heart_5274,Enhancers_Heart_5276
ENSFDAG00000009642	4930523C07Rik	Enhancers_Heart_5298
ENSFDAG00000002934	Rabgap1l	Enhancers_Heart_5335
ENSFDAG00000013303	Rc3h1	Enhancers_Heart_5335
ENSFDAG00000017742	Suco	Enhancers_Heart_5355
ENSFDAG00000017002	Pigc	Enhancers_Heart_5355
ENSFDAG00000016394	Dnm3	Enhancers_Heart_5389
ENSFDAG00000015433	Atp1b1	Enhancers_Heart_5473,Enhancers_Heart_5492,Enhancers_Heart_5493
ENSFDAG00000018607	Nme7	Enhancers_Heart_5473
ENSFDAG00000016485	Dpt	Enhancers_Heart_5492,Enhancers_Heart_5493,Enhancers_Heart_5509
ENSFDAG00000013196	Xcl1	Enhancers_Heart_5509,Enhancers_Heart_5513,Enhancers_Heart_5515
ENSFDAG00000006577	Xcl1	Enhancers_Heart_5513,Enhancers_Heart_5515
ENSFDAG00000021099	Uck2	Enhancers_Heart_5635
ENSFDAG00000010920	Lrrc52	Enhancers_Heart_5653
ENSFDAG00000009918	Rxrg	Enhancers_Heart_5653
ENSFDAG00000008105	Lmx1a	Enhancers_Heart_5682,Enhancers_Heart_5683,Enhancers_Heart_5695,Enhancers_Heart_5698
ENSFDAG00000018008	Pbx1	Enhancers_Heart_5682,Enhancers_Heart_5683,Enhancers_Heart_5695,Enhancers_Heart_5698
ENSFDAG00000004040	Nuf2	Enhancers_Heart_5751
ENSFDAG00000008235	Lmf1	Enhancers_Heart_39905,Enhancers_Heart_39917,Enhancers_Heart_5750
ENSFDAG00000004821	Gng13	Enhancers_Heart_39905,Enhancers_Heart_39917,Enhancers_Heart_5750
ENSFDAG00000000975	Ddr2	Enhancers_Heart_5798
ENSFDAG00000013887	Uap1	Enhancers_Heart_5798
ENSFDAG00000002437	Spata46	Enhancers_Heart_5812,Enhancers_Heart_5813,Enhancers_Heart_5818
ENSFDAG00000017114	Nos1ap	Enhancers_Heart_5812,Enhancers_Heart_5813,Enhancers_Heart_5818
ENSFDAG00000006223	Olfml2b	Enhancers_Heart_5835,Enhancers_Heart_5849,Enhancers_Heart_5852
ENSFDAG00000006016	Atf6	Enhancers_Heart_5835,Enhancers_Heart_5849,Enhancers_Heart_5852
ENSFDAG00000006737	Dusp12	Enhancers_Heart_5877
ENSFDAG00000006195	Fcrlb	Enhancers_Heart_5877
ENSFDAG00000011610	Adamts4	Enhancers_Heart_5903
ENSFDAG00000003555	B4galt3	Enhancers_Heart_5903,Enhancers_Heart_5907
ENSFDAG00000008995	Ppox	Enhancers_Heart_5907
ENSFDAG00000000362	Cadm1	Enhancers_Heart_92590,Enhancers_Heart_92598,Enhancers_Heart_92600,Enhancers_Heart_92602,Enhancers_Heart_92603,Enhancers_Heart_92604
ENSFDAG00000017611	Vsig8	Enhancers_Heart_6000
ENSFDAG00000011473	Slamf8	Enhancers_Heart_6000,Enhancers_Heart_6014
ENSFDAG00000012990	Crp	Enhancers_Heart_6014
ENSFDAG00000015912	Zbtb18	Enhancers_Heart_6083
ENSFDAG00000006367	1700016C15Rik	Enhancers_Heart_6083
ENSFDAG00000010877	Desi2	Enhancers_Heart_6093,Enhancers_Heart_6094
ENSFDAG00000016162	Cox20	Enhancers_Heart_6093,Enhancers_Heart_6094,Enhancers_Heart_6100
ENSFDAG00000019326	Dcun1d5	Enhancers_Heart_6169
ENSFDAG00000015574	Coq8a	Enhancers_Heart_6169
ENSFDAG00000015831	Stum	Enhancers_Heart_6243
ENSFDAG00000017662	Parp1	Enhancers_Heart_6243
ENSFDAG00000011708	Enah	Enhancers_Heart_6293
ENSFDAG00000002494	N.A	Enhancers_Heart_6293
ENSFDAG00000013157	Susd4	Enhancers_Heart_6350
ENSFDAG00000018889	Tlr5	Enhancers_Heart_6350
ENSFDAG00000013700	Aida	Enhancers_Heart_6391,Enhancers_Heart_6392
ENSFDAG00000001241	N.A	Enhancers_Heart_6391,Enhancers_Heart_6392
ENSFDAG00000015643	Taf1a	Enhancers_Heart_6403,Enhancers_Heart_6406,Enhancers_Heart_6408
ENSFDAG00000017275	Dusp10	Enhancers_Heart_6403,Enhancers_Heart_6406,Enhancers_Heart_6408,Enhancers_Heart_6424,Enhancers_Heart_6426,Enhancers_Heart_6431,Enhancers_Heart_6437,Enhancers_Heart_6439
ENSFDAG00000021435	Hlx	Enhancers_Heart_6424,Enhancers_Heart_6426,Enhancers_Heart_6431,Enhancers_Heart_6437,Enhancers_Heart_6439,Enhancers_Heart_6491
ENSFDAG00000015628	Mtarc1	Enhancers_Heart_6491
ENSFDAG00000021307	Eprs	Enhancers_Heart_6511
ENSFDAG00000007320	Lyplal1	Enhancers_Heart_6511,Enhancers_Heart_6563,Enhancers_Heart_6575,Enhancers_Heart_6582,Enhancers_Heart_6585
ENSFDAG00000012435	Tgfb2	Enhancers_Heart_6563,Enhancers_Heart_6575,Enhancers_Heart_6582,Enhancers_Heart_6585
ENSFDAG00000011026	Gpatch2	Enhancers_Heart_6625,Enhancers_Heart_6626
ENSFDAG00000003286	Esrrg	Enhancers_Heart_6625,Enhancers_Heart_6626
ENSFDAG00000007510	Prox1	Enhancers_Heart_6756
ENSFDAG00000014063	Rps6kc1	Enhancers_Heart_6756
ENSFDAG00000015868	Atf3	Enhancers_Heart_6779
ENSFDAG00000008128	Oxsm	Enhancers_Heart_27822
ENSFDAG00000014245	Lrrc3b	Enhancers_Heart_27822
ENSFDAG00000003449	N.A	Enhancers_Heart_6779
ENSFDAG00000009202	Fbxl4	Enhancers_Heart_63462
ENSFDAG00000019705	Ftl1	Enhancers_Heart_6804,Enhancers_Heart_6808,Enhancers_Heart_6844
ENSFDAG00000005004	Ints7	Enhancers_Heart_6804,Enhancers_Heart_6808,Enhancers_Heart_6844
ENSFDAG00000017351	Nek2	Enhancers_Heart_6859
ENSFDAG00000007462	Slc30a1	Enhancers_Heart_6859
ENSFDAG00000001263	Kcnh1	Enhancers_Heart_6871,Enhancers_Heart_6873
ENSFDAG00000008644	Rcor3	Enhancers_Heart_6871
ENSFDAG00000012146	Hhat	Enhancers_Heart_6873
ENSFDAG00000010705	Irf6	Enhancers_Heart_6904
ENSFDAG00000003972	Utp25	Enhancers_Heart_6904
ENSFDAG00000008752	Lamb3	Enhancers_Heart_6942
ENSFDAG00000013684	Camk1g	Enhancers_Heart_6942,Enhancers_Heart_6950,Enhancers_Heart_6955,Enhancers_Heart_6991,Enhancers_Heart_6992
ENSFDAG00000018077	Plxna2	Enhancers_Heart_6955,Enhancers_Heart_6991,Enhancers_Heart_6992,Enhancers_Heart_6998,Enhancers_Heart_7011,Enhancers_Heart_7027,Enhancers_Heart_7028,Enhancers_Heart_7032,Enhancers_Heart_7054
ENSFDAG00000020775	Cd34	Enhancers_Heart_7011,Enhancers_Heart_7027,Enhancers_Heart_7028,Enhancers_Heart_7032,Enhancers_Heart_7054,Enhancers_Heart_7073,Enhancers_Heart_7080,Enhancers_Heart_7082
ENSFDAG00000017165	Cr1l	Enhancers_Heart_7073,Enhancers_Heart_7080,Enhancers_Heart_7082
ENSFDAG00000015919	Ulbp1	Enhancers_Heart_7095
ENSFDAG00000017837	Rbbp4	Enhancers_Heart_7095
ENSFDAG00000005919	Plekhg1	Enhancers_Heart_7167,Enhancers_Heart_7169,Enhancers_Heart_7170,Enhancers_Heart_7173,Enhancers_Heart_7174
ENSFDAG00000018103	Mthfd1l	Enhancers_Heart_7167,Enhancers_Heart_7169,Enhancers_Heart_7170,Enhancers_Heart_7173,Enhancers_Heart_7174,Enhancers_Heart_7207,Enhancers_Heart_7208
ENSFDAG00000005814	Akap12	Enhancers_Heart_7207,Enhancers_Heart_7208,Enhancers_Heart_7239
ENSFDAG00000019733	Zbtb2	Enhancers_Heart_7239
ENSFDAG00000019132	Esr1	Enhancers_Heart_7263,Enhancers_Heart_7265
ENSFDAG00000016136	N.A	Enhancers_Heart_7263,Enhancers_Heart_7265,Enhancers_Heart_7272,Enhancers_Heart_7274
ENSFDAG00000015788	N.A	Enhancers_Heart_7274
ENSFDAG00000000859	Ust	Enhancers_Heart_7398
ENSFDAG00000005242	Sash1	Enhancers_Heart_7398
ENSFDAG00000000974	Adgb	Enhancers_Heart_39770
ENSFDAG00000008123	N.A	Enhancers_Heart_8152
ENSFDAG00000010757	Eya4	Enhancers_Heart_8152
ENSFDAG00000007334	Fbxo30	Enhancers_Heart_7505
ENSFDAG00000015030	Epm2a	Enhancers_Heart_7505
ENSFDAG00000016400	Edn2	Enhancers_Heart_66569,Enhancers_Heart_66571
ENSFDAG00000002380	Hivep3	Enhancers_Heart_66544,Enhancers_Heart_66569,Enhancers_Heart_66571
ENSFDAG00000020411	Pde7b	Enhancers_Heart_7975,Enhancers_Heart_7986,Enhancers_Heart_7989,Enhancers_Heart_7991,Enhancers_Heart_8004,Enhancers_Heart_8018,Enhancers_Heart_8028,Enhancers_Heart_8033,Enhancers_Heart_8042,Enhancers_Heart_8043
ENSFDAG00000018815	Mtfr2	Enhancers_Heart_7975,Enhancers_Heart_7986,Enhancers_Heart_7989,Enhancers_Heart_7991,Enhancers_Heart_8004,Enhancers_Heart_8018
ENSFDAG00000013205	Atg14	Enhancers_Heart_51061,Enhancers_Heart_51062
ENSFDAG00000006095	Ahi1	Enhancers_Heart_8028,Enhancers_Heart_8033,Enhancers_Heart_8042,Enhancers_Heart_8043,Enhancers_Heart_8045
ENSFDAG00000006846	Myb	Enhancers_Heart_8045
ENSFDAG00000005816	Rpl36a	Enhancers_Heart_8055,Enhancers_Heart_8060
ENSFDAG00000019079	Aldh8a1	Enhancers_Heart_8055,Enhancers_Heart_8060
ENSFDAG00000007196	Slc2a12	Enhancers_Heart_8126
ENSFDAG00000015024	Tbpl1	Enhancers_Heart_8126,Enhancers_Heart_8133,Enhancers_Heart_8142,Enhancers_Heart_8143
ENSFDAG00000021436	Tcf21	Enhancers_Heart_8133,Enhancers_Heart_8142,Enhancers_Heart_8143
ENSFDAG00000019094	Moxd1	Enhancers_Heart_8207,Enhancers_Heart_8208
ENSFDAG00000014619	Enpp1	Enhancers_Heart_8207,Enhancers_Heart_8208,Enhancers_Heart_8234
ENSFDAG00000011940	Enpp3	Enhancers_Heart_8234
ENSFDAG00000021047	N.A	Enhancers_Heart_8280
ENSFDAG00000018438	Epb41l2	Enhancers_Heart_8280
ENSFDAG00000017494	Lama2	Enhancers_Heart_8356,Enhancers_Heart_8357,Enhancers_Heart_8360
ENSFDAG00000006304	Ptprk	Enhancers_Heart_8411,Enhancers_Heart_8431
ENSFDAG00000018289	Themis	Enhancers_Heart_8411,Enhancers_Heart_8431
ENSFDAG00000018092	Ncoa7	Enhancers_Heart_8465,Enhancers_Heart_8466,Enhancers_Heart_8469
ENSFDAG00000014439	Hddc2	Enhancers_Heart_8465,Enhancers_Heart_8466,Enhancers_Heart_8469
ENSFDAG00000008152	Usp50	Enhancers_Heart_55188
ENSFDAG00000018221	Clvs2	Enhancers_Heart_8504
ENSFDAG00000019119	Smpdl3a	Enhancers_Heart_8504
ENSFDAG00000011630	Rwdd1	Enhancers_Heart_8507
ENSFDAG00000000801	Calhm4	Enhancers_Heart_8507
ENSFDAG00000006132	Cdk19	Enhancers_Heart_8780
ENSFDAG00000006210	Amd1	Enhancers_Heart_8780
ENSFDAG00000006211	Ddo	Enhancers_Heart_8789,Enhancers_Heart_8790
ENSFDAG00000013511	Prep	Enhancers_Heart_9028,Enhancers_Heart_9041,Enhancers_Heart_9046,Enhancers_Heart_9054,Enhancers_Heart_9055
ENSFDAG00000000883	Popdc3	Enhancers_Heart_9041,Enhancers_Heart_9046,Enhancers_Heart_9054,Enhancers_Heart_9055
ENSFDAG00000014916	Slc35f1	Enhancers_Heart_9122,Enhancers_Heart_9128,Enhancers_Heart_9130
ENSFDAG00000005943	Pln	Enhancers_Heart_9122,Enhancers_Heart_9128,Enhancers_Heart_9130
ENSFDAG00000004206	Hsf2	Enhancers_Heart_9234,Enhancers_Heart_9243,Enhancers_Heart_9246,Enhancers_Heart_9248,Enhancers_Heart_9270
ENSFDAG00000017357	Gja6	Enhancers_Heart_9234,Enhancers_Heart_9243,Enhancers_Heart_9246,Enhancers_Heart_9248,Enhancers_Heart_9270
ENSFDAG00000006739	P4ha2	Enhancers_Heart_14294
ENSFDAG00000009971	Csf2	Enhancers_Heart_14294
ENSFDAG00000005213	Ltbp1	Enhancers_Heart_42208,Enhancers_Heart_42211,Enhancers_Heart_42244,Enhancers_Heart_42249,Enhancers_Heart_42263,Enhancers_Heart_42264,Enhancers_Heart_42265,Enhancers_Heart_42270,Enhancers_Heart_42275,Enhancers_Heart_42276,Enhancers_Heart_42290,Enhancers_Heart_42293,Enhancers_Heart_42295
ENSFDAG00000018013	Ttc27	Enhancers_Heart_42208,Enhancers_Heart_42211
ENSFDAG00000015064	Mypn	Enhancers_Heart_9623
ENSFDAG00000015237	Pbld1	Enhancers_Heart_9623
ENSFDAG00000019256	Ctnna3	Enhancers_Heart_9645,Enhancers_Heart_9649,Enhancers_Heart_9652
ENSFDAG00000014157	Dnajc12	Enhancers_Heart_9645
ENSFDAG00000008854	Lrrtm3	Enhancers_Heart_9649,Enhancers_Heart_9652
ENSFDAG00000011063	N.A	Enhancers_Heart_9693
ENSFDAG00000003400	Reep3	Enhancers_Heart_9693
ENSFDAG00000017527	Jmjd1c	Enhancers_Heart_9726
ENSFDAG00000005980	Nrbf2	Enhancers_Heart_9726
ENSFDAG00000001543	Arid5b	Enhancers_Heart_9786,Enhancers_Heart_9795
ENSFDAG00000000091	Cabcoco1	Enhancers_Heart_9786,Enhancers_Heart_9795
ENSFDAG00000003819	Cdk1	Enhancers_Heart_9862
ENSFDAG00000005711	Ank3	Enhancers_Heart_9862,Enhancers_Heart_9876,Enhancers_Heart_9879,Enhancers_Heart_9883,Enhancers_Heart_9889,Enhancers_Heart_9901,Enhancers_Heart_9903,Enhancers_Heart_9935,Enhancers_Heart_9945,Enhancers_Heart_9946
ENSFDAG00000012870	Ccdc6	Enhancers_Heart_9876,Enhancers_Heart_9879,Enhancers_Heart_9883,Enhancers_Heart_9889,Enhancers_Heart_9901,Enhancers_Heart_9903,Enhancers_Heart_9935,Enhancers_Heart_9945,Enhancers_Heart_9946
ENSFDAG00000006762	Bcr	Enhancers_Heart_10078
ENSFDAG00000013627	Specc1l	Enhancers_Heart_10078,Enhancers_Heart_10108
ENSFDAG00000007747	Adora2a	Enhancers_Heart_10108
ENSFDAG00000019173	Ggt5	Enhancers_Heart_10174
ENSFDAG00000005610	Susd2	Enhancers_Heart_10174
ENSFDAG00000015735	Smarcb1	Enhancers_Heart_10208
ENSFDAG00000005095	Mmp11	Enhancers_Heart_10208
ENSFDAG00000012173	S100b	Enhancers_Heart_10219
ENSFDAG00000008112	Dip2a	Enhancers_Heart_10219
ENSFDAG00000019143	Ergic1	Enhancers_Heart_40027
ENSFDAG00000008576	Dusp1	Enhancers_Heart_39969
ENSFDAG00000014859	Notch2	Enhancers_Heart_60938,Enhancers_Heart_60943,Enhancers_Heart_60945
ENSFDAG00000018553	Sec22b	Enhancers_Heart_60938,Enhancers_Heart_60943,Enhancers_Heart_60945
ENSFDAG00000018811	Atp8b3	Enhancers_Heart_10506
ENSFDAG00000012754	Map2k2	Enhancers_Heart_10572
ENSFDAG00000010563	Zbtb7a	Enhancers_Heart_10572
ENSFDAG00000012572	Nfic	Enhancers_Heart_10598
ENSFDAG00000014780	Cox7a2	Enhancers_Heart_94557,Enhancers_Heart_94558
ENSFDAG00000010100	Filip1	Enhancers_Heart_94584
ENSFDAG00000012426	1500009L16Rik	Enhancers_Heart_10698,Enhancers_Heart_10710
ENSFDAG00000016131	Nuak1	Enhancers_Heart_10698,Enhancers_Heart_10710,Enhancers_Heart_10729
ENSFDAG00000015441	Tcp11l2	Enhancers_Heart_10729
ENSFDAG00000019233	Fbxo7	Enhancers_Heart_10829,Enhancers_Heart_10833
ENSFDAG00000018524	Timp3	Enhancers_Heart_10829,Enhancers_Heart_10833,Enhancers_Heart_10864,Enhancers_Heart_10865
ENSFDAG00000005973	Syn3	Enhancers_Heart_10864,Enhancers_Heart_10865
ENSFDAG00000010820	Pah	Enhancers_Heart_10907,Enhancers_Heart_10909,Enhancers_Heart_10910
ENSFDAG00000010527	Igf1	Enhancers_Heart_10907,Enhancers_Heart_10909,Enhancers_Heart_10910,Enhancers_Heart_10929,Enhancers_Heart_10930,Enhancers_Heart_10931
ENSFDAG00000005746	Pmch	Enhancers_Heart_10929,Enhancers_Heart_10930,Enhancers_Heart_10931
ENSFDAG00000007028	Slc6a8	Enhancers_Heart_10948,Enhancers_Heart_96980
ENSFDAG00000021229	Bcap31	Enhancers_Heart_10948,Enhancers_Heart_96980
ENSFDAG00000014755	Washc3	Enhancers_Heart_10949
ENSFDAG00000016262	Dram1	Enhancers_Heart_10949
ENSFDAG00000010036	Ano4	Enhancers_Heart_10980,Enhancers_Heart_10981,Enhancers_Heart_10983
ENSFDAG00000009055	Gas2l3	Enhancers_Heart_10980,Enhancers_Heart_10981,Enhancers_Heart_10983,Enhancers_Heart_11001
ENSFDAG00000000806	Nr1h4	Enhancers_Heart_11001
ENSFDAG00000011131	Tmcc3	Enhancers_Heart_11263
ENSFDAG00000011524	Cep83	Enhancers_Heart_11263
ENSFDAG00000015308	N.A	Enhancers_Heart_11299
ENSFDAG00000010791	Cradd	Enhancers_Heart_11299
ENSFDAG00000010190	Nudt4	Enhancers_Heart_11356,Enhancers_Heart_11363,Enhancers_Heart_11368,Enhancers_Heart_11378,Enhancers_Heart_11394
ENSFDAG00000000498	Eea1	Enhancers_Heart_11363,Enhancers_Heart_11368,Enhancers_Heart_11378,Enhancers_Heart_11394,Enhancers_Heart_11416
ENSFDAG00000008089	N.A	Enhancers_Heart_11416
ENSFDAG00000001780	Atp2b1	Enhancers_Heart_11533,Enhancers_Heart_11534,Enhancers_Heart_11547,Enhancers_Heart_11551
ENSFDAG00000020160	Poc1b	Enhancers_Heart_11551,Enhancers_Heart_11563,Enhancers_Heart_11573,Enhancers_Heart_11609,Enhancers_Heart_11612
ENSFDAG00000008181	Dusp6	Enhancers_Heart_11563,Enhancers_Heart_11573,Enhancers_Heart_11609,Enhancers_Heart_11612
ENSFDAG00000018188	Kitl	Enhancers_Heart_11640,Enhancers_Heart_11641
ENSFDAG00000005687	Tmtc3	Enhancers_Heart_11640,Enhancers_Heart_11641
ENSFDAG00000004009	Tmtc2	Enhancers_Heart_11691,Enhancers_Heart_11692,Enhancers_Heart_11696,Enhancers_Heart_11698,Enhancers_Heart_11699,Enhancers_Heart_11717
ENSFDAG00000018726	Ccdc59	Enhancers_Heart_11717
ENSFDAG00000020329	Myf6	Enhancers_Heart_11726
ENSFDAG00000017687	Bbs10	Enhancers_Heart_11834
ENSFDAG00000004093	Nap1l1	Enhancers_Heart_11834
ENSFDAG00000017297	Phlda1	Enhancers_Heart_11844,Enhancers_Heart_11883,Enhancers_Heart_11885
ENSFDAG00000019270	Krr1	Enhancers_Heart_11844,Enhancers_Heart_11883,Enhancers_Heart_11885
ENSFDAG00000003534	Ptprb	Enhancers_Heart_11906,Enhancers_Heart_11910
ENSFDAG00000011196	Ptprr	Enhancers_Heart_11906,Enhancers_Heart_11910
ENSFDAG00000010878	Ifng	Enhancers_Heart_12078
ENSFDAG00000006329	Dyrk2	Enhancers_Heart_12078,Enhancers_Heart_12093
ENSFDAG00000007423	Cand1	Enhancers_Heart_12093
ENSFDAG00000006316	Hmga2	Enhancers_Heart_12127
ENSFDAG00000015015	Msrb3	Enhancers_Heart_12127
ENSFDAG00000006046	Ppm1h	Enhancers_Heart_12242,Enhancers_Heart_12258
ENSFDAG00000006734	Mon2	Enhancers_Heart_12242,Enhancers_Heart_12258
ENSFDAG00000017289	Rpl7	Enhancers_Heart_12296
ENSFDAG00000008890	Slc16a7	Enhancers_Heart_12296,Enhancers_Heart_12308,Enhancers_Heart_12309,Enhancers_Heart_12310,Enhancers_Heart_12311,Enhancers_Heart_12313
ENSFDAG00000008668	Lrig3	Enhancers_Heart_12308,Enhancers_Heart_12309,Enhancers_Heart_12310,Enhancers_Heart_12311,Enhancers_Heart_12313
ENSFDAG00000003858	Atp23	Enhancers_Heart_12333
ENSFDAG00000005123	Ctdsp2	Enhancers_Heart_12333
ENSFDAG00000010569	Dctn2	Enhancers_Heart_12354
ENSFDAG00000008583	Ddit3	Enhancers_Heart_12354
ENSFDAG00000012985	Shmt2	Enhancers_Heart_12372
ENSFDAG00000017848	Lrp1	Enhancers_Heart_12372
ENSFDAG00000005525	Rab6b	Enhancers_Heart_95151
ENSFDAG00000019541	Gpr182	Enhancers_Heart_12405
ENSFDAG00000018683	Rdh16f2	Enhancers_Heart_12405
ENSFDAG00000006314	Pym1	Enhancers_Heart_65173
ENSFDAG00000014070	Mmp19	Enhancers_Heart_65173
ENSFDAG00000008615	Limk2	Enhancers_Heart_53022
ENSFDAG00000015392	Rnf185	Enhancers_Heart_53022
ENSFDAG00000019867	Morc2b	Enhancers_Heart_12546
ENSFDAG00000013368	Osbp2	Enhancers_Heart_12546
ENSFDAG00000005103	Tbc1d10a	Enhancers_Heart_12586
ENSFDAG00000015616	Castor1	Enhancers_Heart_12586,Enhancers_Heart_12593
ENSFDAG00000014593	Lif	Enhancers_Heart_12593,Enhancers_Heart_12615
ENSFDAG00000015006	Hormad2	Enhancers_Heart_12615,Enhancers_Heart_12622,Enhancers_Heart_12623
ENSFDAG00000006372	Mtmr3	Enhancers_Heart_12622,Enhancers_Heart_12623
ENSFDAG00000010483	Uqcr10	Enhancers_Heart_12658
ENSFDAG00000019792	Zmat5	Enhancers_Heart_12658
ENSFDAG00000015077	Shank2	Enhancers_Heart_85602,Enhancers_Heart_85604
ENSFDAG00000011943	Cttn	Enhancers_Heart_85602,Enhancers_Heart_85604
ENSFDAG00000011259	Gm5065	Enhancers_Heart_13075,Enhancers_Heart_13080
ENSFDAG00000011673	Peli1	Enhancers_Heart_13075,Enhancers_Heart_13080
ENSFDAG00000009448	Tmem17	Enhancers_Heart_13168
ENSFDAG00000012824	B3gnt2	Enhancers_Heart_13168
ENSFDAG00000008344	Fam161a	Enhancers_Heart_13181
ENSFDAG00000011933	Rplp0	Enhancers_Heart_13181
ENSFDAG00000006493	Bcl11a	Enhancers_Heart_13195,Enhancers_Heart_13202
ENSFDAG00000013181	Rtn4	Enhancers_Heart_13255,Enhancers_Heart_13265
ENSFDAG00000016108	Clhc1	Enhancers_Heart_13255
ENSFDAG00000014864	Eml6	Enhancers_Heart_13265,Enhancers_Heart_13290
ENSFDAG00000017317	Sptbn1	Enhancers_Heart_13290
ENSFDAG00000017486	Psme4	Enhancers_Heart_13387
ENSFDAG00000019020	Gpr75	Enhancers_Heart_13387
ENSFDAG00000008825	Anks1	Enhancers_Heart_40146
ENSFDAG00000013497	Tcp11	Enhancers_Heart_40146
ENSFDAG00000002327	Stc2	Enhancers_Heart_13424,Enhancers_Heart_13431
ENSFDAG00000018063	Bod1	Enhancers_Heart_13424,Enhancers_Heart_13431,Enhancers_Heart_13455,Enhancers_Heart_13464
ENSFDAG00000009581	Cradd	Enhancers_Heart_13455,Enhancers_Heart_13464,Enhancers_Heart_13490,Enhancers_Heart_13495
ENSFDAG00000011935	Cpeb4	Enhancers_Heart_13490,Enhancers_Heart_13495,Enhancers_Heart_13511
ENSFDAG00000012831	4930524B15Rik	Enhancers_Heart_13511
ENSFDAG00000004075	Neurl1b	Enhancers_Heart_13529,Enhancers_Heart_13532,Enhancers_Heart_13533,Enhancers_Heart_39969
ENSFDAG00000011476	Sh3pxd2b	Enhancers_Heart_13529,Enhancers_Heart_13532,Enhancers_Heart_13533,Enhancers_Heart_13552,Enhancers_Heart_13557
ENSFDAG00000015430	Ubtd2	Enhancers_Heart_13557
ENSFDAG00000001486	Lcp2	Enhancers_Heart_13650
ENSFDAG00000017195	Foxi1	Enhancers_Heart_13650
ENSFDAG00000006915	Spdl1	Enhancers_Heart_13666
ENSFDAG00000013935	Slit3	Enhancers_Heart_13666,Enhancers_Heart_13676,Enhancers_Heart_13684
ENSFDAG00000017945	Pank3	Enhancers_Heart_13676,Enhancers_Heart_13684
ENSFDAG00000012578	Wwc1	Enhancers_Heart_13719
ENSFDAG00000014447	Tenm2	Enhancers_Heart_13719
ENSFDAG00000012511	Ebf2	Enhancers_Heart_30289
ENSFDAG00000014792	Mast2	Enhancers_Heart_66353,Enhancers_Heart_66355,Enhancers_Heart_66356
ENSFDAG00000012399	Mgst2	Enhancers_Heart_59186
ENSFDAG00000017858	Maml3	Enhancers_Heart_59186
ENSFDAG00000016239	Sec24a	Enhancers_Heart_14138
ENSFDAG00000010710	Sar1b	Enhancers_Heart_14138
ENSFDAG00000006576	Fstl4	Enhancers_Heart_14213
ENSFDAG00000001340	Hspa4	Enhancers_Heart_14213
ENSFDAG00000002311	N.A	Enhancers_Heart_14284
ENSFDAG00000009282	Slc22a4	Enhancers_Heart_14284
ENSFDAG00000005918	Acsl6	Enhancers_Heart_14311
ENSFDAG00000016812	Fnip1	Enhancers_Heart_14311
ENSFDAG00000017580	Tnip1	Enhancers_Heart_14365
ENSFDAG00000010416	Anxa6	Enhancers_Heart_14365
ENSFDAG00000016157	Gria1	Enhancers_Heart_14439
ENSFDAG00000009696	Fam114a2	Enhancers_Heart_14439
ENSFDAG00000009690	Galnt10	Enhancers_Heart_14466
ENSFDAG00000012790	Sap30l	Enhancers_Heart_14466
ENSFDAG00000021125	Larp1	Enhancers_Heart_14474
ENSFDAG00000011403	Hand1	Enhancers_Heart_14474
ENSFDAG00000014952	Med9	Enhancers_Heart_14589
ENSFDAG00000020804	Rasd1	Enhancers_Heart_14589
ENSFDAG00000005117	Pemt	Enhancers_Heart_14618
ENSFDAG00000013691	Rai1	Enhancers_Heart_14618
ENSFDAG00000019970	Srebf1	Enhancers_Heart_14640,Enhancers_Heart_14641,Enhancers_Heart_14643,Enhancers_Heart_14655
ENSFDAG00000005461	Tom1l2	Enhancers_Heart_14640,Enhancers_Heart_14641,Enhancers_Heart_14643,Enhancers_Heart_14655
ENSFDAG00000008721	Drc3	Enhancers_Heart_14661,Enhancers_Heart_14665,Enhancers_Heart_14666,Enhancers_Heart_14667,Enhancers_Heart_14670
ENSFDAG00000009744	Atpaf2	Enhancers_Heart_14661,Enhancers_Heart_14665,Enhancers_Heart_14666,Enhancers_Heart_14667,Enhancers_Heart_14670,Enhancers_Heart_14673
ENSFDAG00000009732	Gid4	Enhancers_Heart_14673
ENSFDAG00000011356	Alkbh5	Enhancers_Heart_14676
ENSFDAG00000019767	Llgl1	Enhancers_Heart_14676
ENSFDAG00000016866	Tmem11	Enhancers_Heart_14686,Enhancers_Heart_14690
ENSFDAG00000007021	Dhrs7b	Enhancers_Heart_14686
ENSFDAG00000004652	Aldh3a2	Enhancers_Heart_14721
ENSFDAG00000018791	N.A	Enhancers_Heart_14721
ENSFDAG00000010479	Myocd	Enhancers_Heart_14919
ENSFDAG00000010056	Arhgap44	Enhancers_Heart_14919
ENSFDAG00000015593	Myh3	Enhancers_Heart_14990,Enhancers_Heart_14995,Enhancers_Heart_14997
ENSFDAG00000017505	Sco1	Enhancers_Heart_14990
ENSFDAG00000008545	Myh2	Enhancers_Heart_14997
ENSFDAG00000020798	Glp2r	Enhancers_Heart_15046,Enhancers_Heart_15048,Enhancers_Heart_15049,Enhancers_Heart_15055,Enhancers_Heart_15056
ENSFDAG00000007801	Rcvrn	Enhancers_Heart_15046,Enhancers_Heart_15048,Enhancers_Heart_15049,Enhancers_Heart_15055,Enhancers_Heart_15056
ENSFDAG00000008366	Ctc1	Enhancers_Heart_15169
ENSFDAG00000018241	Rangrf	Enhancers_Heart_15169
ENSFDAG00000012292	Sox15	Enhancers_Heart_15211
ENSFDAG00000014352	Mpdu1	Enhancers_Heart_15211
ENSFDAG00000008287	Polr2a	Enhancers_Heart_15217
ENSFDAG00000008055	Tnfsf12	Enhancers_Heart_15217
ENSFDAG00000005181	Ybx2	Enhancers_Heart_15232
ENSFDAG00000007342	Wscd1	Enhancers_Heart_15309,Enhancers_Heart_15310
ENSFDAG00000019527	Pimreg	Enhancers_Heart_15309,Enhancers_Heart_15310
ENSFDAG00000001628	Pitpnm3	Enhancers_Heart_15326
ENSFDAG00000016784	4933427D14Rik	Enhancers_Heart_15326
ENSFDAG00000017643	Cyb5d2	Enhancers_Heart_15382
ENSFDAG00000021398	Atp2a3	Enhancers_Heart_15382
ENSFDAG00000007868	Camkk1	Enhancers_Heart_15409
ENSFDAG00000011227	N.A	Enhancers_Heart_15418
ENSFDAG00000008198	Tax1bp3	Enhancers_Heart_15425,Enhancers_Heart_15430
ENSFDAG00000004378	Ctns	Enhancers_Heart_15425,Enhancers_Heart_15430
ENSFDAG00000012921	Trpv3	Enhancers_Heart_15448
ENSFDAG00000014169	Aspa	Enhancers_Heart_15448
ENSFDAG00000015106	Smg6	Enhancers_Heart_15524
ENSFDAG00000021489	Hic1	Enhancers_Heart_15524
ENSFDAG00000015187	Rtn4rl1	Enhancers_Heart_15565,Enhancers_Heart_15570,Enhancers_Heart_15572
ENSFDAG00000007720	Rpa1	Enhancers_Heart_15565,Enhancers_Heart_15570,Enhancers_Heart_15572
ENSFDAG00000020931	Scarf1	Enhancers_Heart_15590
ENSFDAG00000021429	Slc43a2	Enhancers_Heart_15590
ENSFDAG00000016697	Inpp5k	Enhancers_Heart_15623
ENSFDAG00000015737	Myo1c	Enhancers_Heart_15623
ENSFDAG00000008512	Timm22	Enhancers_Heart_15729,Enhancers_Heart_15730
ENSFDAG00000008698	Abr	Enhancers_Heart_15729,Enhancers_Heart_15730
ENSFDAG00000019592	Blmh	Enhancers_Heart_15787
ENSFDAG00000018277	Slc6a4	Enhancers_Heart_15787
ENSFDAG00000012148	Ssh2	Enhancers_Heart_15813
ENSFDAG00000013688	Coro6	Enhancers_Heart_15813
ENSFDAG00000016088	Git1	Enhancers_Heart_15851
ENSFDAG00000003040	Trp53i13	Enhancers_Heart_15851,Enhancers_Heart_15854,Enhancers_Heart_15855
ENSFDAG00000008218	Abhd15	Enhancers_Heart_15854,Enhancers_Heart_15855
ENSFDAG00000014311	N.A	Enhancers_Heart_15854,Enhancers_Heart_15855
ENSFDAG00000014546	Myo18a	Enhancers_Heart_15882
ENSFDAG00000005579	Pipox	Enhancers_Heart_15882
ENSFDAG00000010847	Tmem97	Enhancers_Heart_15933,Enhancers_Heart_42407
ENSFDAG00000019208	Nlk	Enhancers_Heart_15933,Enhancers_Heart_42407
ENSFDAG00000011306	Suz12	Enhancers_Heart_16074
ENSFDAG00000009870	Crlf3	Enhancers_Heart_16074
ENSFDAG00000007149	Zfp207	Enhancers_Heart_16108
ENSFDAG00000011823	Psmd11	Enhancers_Heart_16108
ENSFDAG00000011118	N.A	Enhancers_Heart_16135
ENSFDAG00000000917	Ccl12	Enhancers_Heart_16176
ENSFDAG00000021200	Tmem132e	Enhancers_Heart_16176
ENSFDAG00000012428	Rffl	Enhancers_Heart_16178,Enhancers_Heart_16181
ENSFDAG00000013484	Lig3	Enhancers_Heart_16178,Enhancers_Heart_16181
ENSFDAG00000001350	Ap2b1	Enhancers_Heart_16194,Enhancers_Heart_16195,Enhancers_Heart_16196,Enhancers_Heart_16205,Enhancers_Heart_16206
ENSFDAG00000017958	Rasl10b	Enhancers_Heart_16194,Enhancers_Heart_16195,Enhancers_Heart_16196,Enhancers_Heart_16205,Enhancers_Heart_16206
ENSFDAG00000008877	Dusp14	Enhancers_Heart_16228,Enhancers_Heart_16232,Enhancers_Heart_16236
ENSFDAG00000018957	Synrg	Enhancers_Heart_16228,Enhancers_Heart_16232
ENSFDAG00000012908	Tada2a	Enhancers_Heart_16236
ENSFDAG00000012724	Aatf	Enhancers_Heart_16240,Enhancers_Heart_16245,Enhancers_Heart_16247,Enhancers_Heart_16254,Enhancers_Heart_16256
ENSFDAG00000021505	Acaca	Enhancers_Heart_16240,Enhancers_Heart_16245,Enhancers_Heart_16247,Enhancers_Heart_16254,Enhancers_Heart_16256
ENSFDAG00000016250	Car4	Enhancers_Heart_16266,Enhancers_Heart_16267
ENSFDAG00000018400	Usp32	Enhancers_Heart_16267
ENSFDAG00000013200	Tbx2	Enhancers_Heart_16324
ENSFDAG00000018036	Bcas3	Enhancers_Heart_16324
ENSFDAG00000007152	Vmp1	Enhancers_Heart_16361
ENSFDAG00000013600	Tubd1	Enhancers_Heart_16361
ENSFDAG00000009418	Ppm1e	Enhancers_Heart_16438
ENSFDAG00000015992	Trim37	Enhancers_Heart_16438
ENSFDAG00000018275	Lpo	Enhancers_Heart_16470
ENSFDAG00000017786	Mpo	Enhancers_Heart_16470
ENSFDAG00000008632	Cuedc1	Enhancers_Heart_16475
ENSFDAG00000010026	Vezf1	Enhancers_Heart_16475
ENSFDAG00000007153	Mrps23	Enhancers_Heart_16512,Enhancers_Heart_16530,Enhancers_Heart_16531,Enhancers_Heart_16551,Enhancers_Heart_16604
ENSFDAG00000016118	Msi2	Enhancers_Heart_16512,Enhancers_Heart_16530,Enhancers_Heart_16531,Enhancers_Heart_16551,Enhancers_Heart_16604,Enhancers_Heart_16620
ENSFDAG00000014839	Akap1	Enhancers_Heart_16620
ENSFDAG00000011224	Ankfn1	Enhancers_Heart_16658
ENSFDAG00000007284	N.A	Enhancers_Heart_16658,Enhancers_Heart_16660,Enhancers_Heart_16661,Enhancers_Heart_16668
ENSFDAG00000007632	Pctp	Enhancers_Heart_16660,Enhancers_Heart_16661,Enhancers_Heart_16668
ENSFDAG00000012309	Tmem100	Enhancers_Heart_16690
ENSFDAG00000007109	Mmd	Enhancers_Heart_16690
ENSFDAG00000020129	Kif2b	Enhancers_Heart_16737
ENSFDAG00000007408	Car10	Enhancers_Heart_16737,Enhancers_Heart_16743,Enhancers_Heart_16746
ENSFDAG00000009656	Utp18	Enhancers_Heart_16743,Enhancers_Heart_16746
ENSFDAG00000018786	Wfikkn2	Enhancers_Heart_16761,Enhancers_Heart_16764
ENSFDAG00000006711	Spag9	Enhancers_Heart_16761,Enhancers_Heart_16764
ENSFDAG00000007121	Abcc3	Enhancers_Heart_16783,Enhancers_Heart_16789
ENSFDAG00000008271	Ankrd40	Enhancers_Heart_16783,Enhancers_Heart_16789
ENSFDAG00000000183	Eme1	Enhancers_Heart_16829,Enhancers_Heart_16830
ENSFDAG00000012005	Lrrc59	Enhancers_Heart_16829,Enhancers_Heart_16830
ENSFDAG00000011806	Pdk2	Enhancers_Heart_16882,Enhancers_Heart_16884,Enhancers_Heart_16885
ENSFDAG00000018168	Itga3	Enhancers_Heart_16884,Enhancers_Heart_16885
ENSFDAG00000019321	Kat7	Enhancers_Heart_16896,Enhancers_Heart_16911
ENSFDAG00000007579	Dlx4	Enhancers_Heart_16896
ENSFDAG00000013152	Fam117a	Enhancers_Heart_16911
ENSFDAG00000007364	Spop	Enhancers_Heart_16948,Enhancers_Heart_16953
ENSFDAG00000009268	Nxph3	Enhancers_Heart_16948,Enhancers_Heart_16953
ENSFDAG00000007765	N.A	Enhancers_Heart_16982
ENSFDAG00000007472	Hoxb5	Enhancers_Heart_16982
ENSFDAG00000019925	Skap1	Enhancers_Heart_17004,Enhancers_Heart_17009
ENSFDAG00000007321	Snx11	Enhancers_Heart_17004,Enhancers_Heart_17009
ENSFDAG00000004296	Copz2	Enhancers_Heart_17028
ENSFDAG00000000244	Nfe2l1	Enhancers_Heart_17028
ENSFDAG00000006843	Pip4k2b	Enhancers_Heart_17084
ENSFDAG00000016127	Psmb3	Enhancers_Heart_17084
ENSFDAG00000013247	Ppp1r1b	Enhancers_Heart_17134
ENSFDAG00000009710	Cdk12	Enhancers_Heart_17134
ENSFDAG00000020644	Erbb2	Enhancers_Heart_17154
ENSFDAG00000006018	Rapgefl1	Enhancers_Heart_17185
ENSFDAG00000021367	Wipf2	Enhancers_Heart_17185
ENSFDAG00000011242	Gast	Enhancers_Heart_17274
ENSFDAG00000014202	Jup	Enhancers_Heart_17274
ENSFDAG00000001368	Nt5c3b	Enhancers_Heart_17289
ENSFDAG00000007835	Klhl10	Enhancers_Heart_17289
ENSFDAG00000000480	Atp6v0a1	Enhancers_Heart_17329
ENSFDAG00000006787	Naglu	Enhancers_Heart_17329
ENSFDAG00000012342	Gja5	Enhancers_Heart_60874,Enhancers_Heart_60881,Enhancers_Heart_60885
ENSFDAG00000005696	Gpr89	Enhancers_Heart_60874,Enhancers_Heart_60881,Enhancers_Heart_60885
ENSFDAG00000014787	Tshz2	Enhancers_Heart_57657,Enhancers_Heart_57660,Enhancers_Heart_57664,Enhancers_Heart_57665,Enhancers_Heart_57666,Enhancers_Heart_57709,Enhancers_Heart_57716,Enhancers_Heart_57722,Enhancers_Heart_57737
ENSFDAG00000010005	Zfp64	Enhancers_Heart_57657,Enhancers_Heart_57660,Enhancers_Heart_57664,Enhancers_Heart_57665,Enhancers_Heart_57666
ENSFDAG00000016452	Mapt	Enhancers_Heart_17576
ENSFDAG00000016871	Kansl1	Enhancers_Heart_17576
ENSFDAG00000014801	Scn4a	Enhancers_Heart_17672
ENSFDAG00000013825	Ern1	Enhancers_Heart_17696
ENSFDAG00000016068	Tex2	Enhancers_Heart_17696
ENSFDAG00000014121	N.A	Enhancers_Heart_17829,Enhancers_Heart_17830
ENSFDAG00000020999	Psmd12	Enhancers_Heart_17829,Enhancers_Heart_17830
ENSFDAG00000007722	Abca9	Enhancers_Heart_18006
ENSFDAG00000007773	Abca6	Enhancers_Heart_18006
ENSFDAG00000016065	Map2k6	Enhancers_Heart_18011,Enhancers_Heart_18014,Enhancers_Heart_18015
ENSFDAG00000010543	Kcnj16	Enhancers_Heart_18011,Enhancers_Heart_18014,Enhancers_Heart_18015
ENSFDAG00000014018	Kcnj2	Enhancers_Heart_18039,Enhancers_Heart_18045,Enhancers_Heart_18046,Enhancers_Heart_18049,Enhancers_Heart_18057,Enhancers_Heart_18058
ENSFDAG00000012886	Sox9	Enhancers_Heart_18073
ENSFDAG00000006801	Sstr2	Enhancers_Heart_18073
ENSFDAG00000015565	Tmem94	Enhancers_Heart_18286,Enhancers_Heart_18289,Enhancers_Heart_18292,Enhancers_Heart_18298
ENSFDAG00000009977	Caskin2	Enhancers_Heart_18289,Enhancers_Heart_18292,Enhancers_Heart_18298
ENSFDAG00000014485	Llgl2	Enhancers_Heart_18308,Enhancers_Heart_18309
ENSFDAG00000009316	Unk	Enhancers_Heart_18331,Enhancers_Heart_18332
ENSFDAG00000016901	Unc13d	Enhancers_Heart_18331,Enhancers_Heart_18332
ENSFDAG00000013759	Ubald2	Enhancers_Heart_18367
ENSFDAG00000021408	Qrich2	Enhancers_Heart_18367
ENSFDAG00000012964	Septin9	Enhancers_Heart_18459,Enhancers_Heart_18469,Enhancers_Heart_18534,Enhancers_Heart_18546
ENSFDAG00000010368	Tnrc6c	Enhancers_Heart_18459,Enhancers_Heart_18469,Enhancers_Heart_18534,Enhancers_Heart_18546
ENSFDAG00000013717	Pgs1	Enhancers_Heart_18606
ENSFDAG00000017856	Dnah17	Enhancers_Heart_18606
ENSFDAG00000012307	Cyth1	Enhancers_Heart_18651
ENSFDAG00000008795	Usp36	Enhancers_Heart_18651
ENSFDAG00000007489	Rbfox3	Enhancers_Heart_18704,Enhancers_Heart_18705,Enhancers_Heart_18706
ENSFDAG00000020079	Enpp7	Enhancers_Heart_18704,Enhancers_Heart_18705,Enhancers_Heart_18706
ENSFDAG00000005238	Cbx4	Enhancers_Heart_18715,Enhancers_Heart_18717
ENSFDAG00000010550	Tbc1d16	Enhancers_Heart_18715,Enhancers_Heart_18717
ENSFDAG00000017260	Dnmt3a	Enhancers_Heart_18979
ENSFDAG00000001221	Efr3b	Enhancers_Heart_18979
ENSFDAG00000014091	Arrdc3	Enhancers_Heart_26153,Enhancers_Heart_26154,Enhancers_Heart_26155,Enhancers_Heart_26156,Enhancers_Heart_26161,Enhancers_Heart_26176
ENSFDAG00000019685	Pum2	Enhancers_Heart_19158
ENSFDAG00000017343	Sdc1	Enhancers_Heart_19158
ENSFDAG00000018279	Cyria	Enhancers_Heart_19304,Enhancers_Heart_19305,Enhancers_Heart_19316
ENSFDAG00000021305	Ddx1	Enhancers_Heart_19304,Enhancers_Heart_19305,Enhancers_Heart_19316
ENSFDAG00000016727	Trib2	Enhancers_Heart_19404,Enhancers_Heart_19406,Enhancers_Heart_19432,Enhancers_Heart_19434,Enhancers_Heart_19438
ENSFDAG00000012547	Lpin1	Enhancers_Heart_19404,Enhancers_Heart_19406,Enhancers_Heart_19432,Enhancers_Heart_19434,Enhancers_Heart_19438
ENSFDAG00000009238	Asap2	Enhancers_Heart_19608
ENSFDAG00000006317	Cpsf3	Enhancers_Heart_19608
ENSFDAG00000013193	Adam17	Enhancers_Heart_19615,Enhancers_Heart_19616
ENSFDAG00000006021	Iah1	Enhancers_Heart_19615,Enhancers_Heart_19616
ENSFDAG00000021503	Myt1l	Enhancers_Heart_19735
ENSFDAG00000004182	Eipr1	Enhancers_Heart_19735
ENSFDAG00000007363	Slc26a4	Enhancers_Heart_19821
ENSFDAG00000005485	Bcap29	Enhancers_Heart_19821
ENSFDAG00000020584	Gpr22	Enhancers_Heart_19822,Enhancers_Heart_19832,Enhancers_Heart_19835
ENSFDAG00000008141	Cog5	Enhancers_Heart_19822
ENSFDAG00000007897	Hbp1	Enhancers_Heart_19832,Enhancers_Heart_19835
ENSFDAG00000017707	Prkar2b	Enhancers_Heart_19874
ENSFDAG00000017872	Pik3cg	Enhancers_Heart_19874,Enhancers_Heart_19882,Enhancers_Heart_19889
ENSFDAG00000006943	Nampt	Enhancers_Heart_19882,Enhancers_Heart_19889
ENSFDAG00000011850	Sypl	Enhancers_Heart_19934
ENSFDAG00000003188	Cdhr3	Enhancers_Heart_19934
ENSFDAG00000014555	N.A	Enhancers_Heart_19967
ENSFDAG00000001127	Atxn7l1	Enhancers_Heart_19967
ENSFDAG00000020997	Hdac9	Enhancers_Heart_19978,Enhancers_Heart_19980,Enhancers_Heart_19984,Enhancers_Heart_19985,Enhancers_Heart_19996,Enhancers_Heart_19997,Enhancers_Heart_20007,Enhancers_Heart_20013,Enhancers_Heart_20015,Enhancers_Heart_20023,Enhancers_Heart_20048
ENSFDAG00000010313	Snx13	Enhancers_Heart_19978,Enhancers_Heart_19980,Enhancers_Heart_19984,Enhancers_Heart_19985,Enhancers_Heart_19996,Enhancers_Heart_19997,Enhancers_Heart_20007,Enhancers_Heart_20013,Enhancers_Heart_20015,Enhancers_Heart_20023,Enhancers_Heart_20048,Enhancers_Heart_20060,Enhancers_Heart_20064
ENSFDAG00000005741	Ahr	Enhancers_Heart_20060,Enhancers_Heart_20064,Enhancers_Heart_20085
ENSFDAG00000011442	Agr2	Enhancers_Heart_20085
ENSFDAG00000007804	Tspan13	Enhancers_Heart_20111
ENSFDAG00000009444	Ankmy2	Enhancers_Heart_20111
ENSFDAG00000012273	Crppa	Enhancers_Heart_20142,Enhancers_Heart_20144,Enhancers_Heart_20172
ENSFDAG00000017113	Meox2	Enhancers_Heart_20142,Enhancers_Heart_20144,Enhancers_Heart_20172,Enhancers_Heart_20183
ENSFDAG00000011696	Dgkb	Enhancers_Heart_20183,Enhancers_Heart_20204
ENSFDAG00000019172	Etv1	Enhancers_Heart_20204,Enhancers_Heart_20209,Enhancers_Heart_20217,Enhancers_Heart_20228,Enhancers_Heart_20230,Enhancers_Heart_20233,Enhancers_Heart_20236,Enhancers_Heart_20240
ENSFDAG00000019045	Arl4a	Enhancers_Heart_20209,Enhancers_Heart_20217,Enhancers_Heart_20228,Enhancers_Heart_20230,Enhancers_Heart_20233,Enhancers_Heart_20236,Enhancers_Heart_20240
ENSFDAG00000021044	Lsmem1	Enhancers_Heart_20254
ENSFDAG00000009004	Zfp277	Enhancers_Heart_20291
ENSFDAG00000009181	Dock4	Enhancers_Heart_20291,Enhancers_Heart_20305
ENSFDAG00000016964	Immp2l	Enhancers_Heart_20305
ENSFDAG00000013449	Gzmb	Enhancers_Heart_20337,Enhancers_Heart_20338,Enhancers_Heart_20370
ENSFDAG00000021296	Stxbp6	Enhancers_Heart_20337,Enhancers_Heart_20338,Enhancers_Heart_20370
ENSFDAG00000011732	Prkd1	Enhancers_Heart_20405
ENSFDAG00000021175	Ap4s1	Enhancers_Heart_20431
ENSFDAG00000013280	Nubpl	Enhancers_Heart_20475
ENSFDAG00000006186	Arhgap5	Enhancers_Heart_20475
ENSFDAG00000020990	Akap6	Enhancers_Heart_20479
ENSFDAG00000021269	Npas3	Enhancers_Heart_20479
ENSFDAG00000014515	Strc	Enhancers_Heart_20503
ENSFDAG00000020982	Egln3	Enhancers_Heart_20503,Enhancers_Heart_20514,Enhancers_Heart_20521
ENSFDAG00000021208	Eapp	Enhancers_Heart_20514,Enhancers_Heart_20521
ENSFDAG00000001794	Sec23a	Enhancers_Heart_20601,Enhancers_Heart_20606,Enhancers_Heart_20610
ENSFDAG00000008920	Clec14a	Enhancers_Heart_20601,Enhancers_Heart_20606,Enhancers_Heart_20610
ENSFDAG00000011541	Vcpkmt	Enhancers_Heart_20705
ENSFDAG00000020010	Arf6	Enhancers_Heart_20705
ENSFDAG00000011478	Abhd12b	Enhancers_Heart_20762,Enhancers_Heart_20764,Enhancers_Heart_20765,Enhancers_Heart_20767
ENSFDAG00000004825	Pygl	Enhancers_Heart_20762,Enhancers_Heart_20764,Enhancers_Heart_20765,Enhancers_Heart_20767
ENSFDAG00000008684	Tmx1	Enhancers_Heart_20790
ENSFDAG00000014158	Frmd6	Enhancers_Heart_20790
ENSFDAG00000005958	Arid4a	Enhancers_Heart_20863
ENSFDAG00000006183	Dact1	Enhancers_Heart_20880,Enhancers_Heart_20881,Enhancers_Heart_20882,Enhancers_Heart_20906,Enhancers_Heart_20908,Enhancers_Heart_20937,Enhancers_Heart_20974
ENSFDAG00000007851	Daam1	Enhancers_Heart_20880,Enhancers_Heart_20881,Enhancers_Heart_20882,Enhancers_Heart_20906,Enhancers_Heart_20908,Enhancers_Heart_20937,Enhancers_Heart_20974
ENSFDAG00000007236	Prkch	Enhancers_Heart_21078,Enhancers_Heart_21108,Enhancers_Heart_21114,Enhancers_Heart_21123,Enhancers_Heart_21125,Enhancers_Heart_21141
ENSFDAG00000007186	Hif1a	Enhancers_Heart_21078,Enhancers_Heart_21108,Enhancers_Heart_21114,Enhancers_Heart_21123,Enhancers_Heart_21125,Enhancers_Heart_21141
ENSFDAG00000014617	N.A	Enhancers_Heart_21238,Enhancers_Heart_21248,Enhancers_Heart_21249
ENSFDAG00000011130	Syne2	Enhancers_Heart_21238,Enhancers_Heart_21248,Enhancers_Heart_21249
ENSFDAG00000020904	Ppp1r36	Enhancers_Heart_21308
ENSFDAG00000012625	Plekhg3	Enhancers_Heart_21308
ENSFDAG00000009994	Sptb	Enhancers_Heart_21327,Enhancers_Heart_21332,Enhancers_Heart_21334,Enhancers_Heart_21336
ENSFDAG00000013123	Fntb	Enhancers_Heart_21327,Enhancers_Heart_21332,Enhancers_Heart_21334,Enhancers_Heart_21336
ENSFDAG00000014159	N.A	Enhancers_Heart_21345,Enhancers_Heart_21347,Enhancers_Heart_21349,Enhancers_Heart_21350,Enhancers_Heart_21364,Enhancers_Heart_21366,Enhancers_Heart_21373
ENSFDAG00000012716	Max	Enhancers_Heart_21345,Enhancers_Heart_21347,Enhancers_Heart_21349,Enhancers_Heart_21350,Enhancers_Heart_21364,Enhancers_Heart_21366,Enhancers_Heart_21373,Enhancers_Heart_21390,Enhancers_Heart_21402
ENSFDAG00000010240	Npm1	Enhancers_Heart_21390,Enhancers_Heart_21402
ENSFDAG00000018357	Fut8	Enhancers_Heart_21408
ENSFDAG00000016336	Plekhh1	Enhancers_Heart_21442,Enhancers_Heart_21443
ENSFDAG00000008789	Pigh	Enhancers_Heart_21442,Enhancers_Heart_21443
ENSFDAG00000000548	Rad51b	Enhancers_Heart_21489,Enhancers_Heart_21545,Enhancers_Heart_21547
ENSFDAG00000014938	Zfp36l1	Enhancers_Heart_21489,Enhancers_Heart_21545,Enhancers_Heart_21547
ENSFDAG00000010725	Actn1	Enhancers_Heart_21642
ENSFDAG00000010434	Dcaf5	Enhancers_Heart_21642
ENSFDAG00000019183	Susd6	Enhancers_Heart_21730
ENSFDAG00000011562	Srsf5	Enhancers_Heart_21730
ENSFDAG00000008077	Pcnx	Enhancers_Heart_21776
ENSFDAG00000009219	Sipa1l1	Enhancers_Heart_21776
ENSFDAG00000017037	Rgs6	Enhancers_Heart_21799,Enhancers_Heart_21802,Enhancers_Heart_21805,Enhancers_Heart_21806,Enhancers_Heart_21807
ENSFDAG00000007850	Dpf3	Enhancers_Heart_21799,Enhancers_Heart_21802,Enhancers_Heart_21805,Enhancers_Heart_21806,Enhancers_Heart_21807,Enhancers_Heart_21876,Enhancers_Heart_21879,Enhancers_Heart_21886,Enhancers_Heart_21887,Enhancers_Heart_21894,Enhancers_Heart_21897,Enhancers_Heart_21898
ENSFDAG00000018924	Dcaf4	Enhancers_Heart_21876,Enhancers_Heart_21879,Enhancers_Heart_21886,Enhancers_Heart_21887,Enhancers_Heart_21894,Enhancers_Heart_21897,Enhancers_Heart_21898
ENSFDAG00000006542	Rbm25	Enhancers_Heart_21915
ENSFDAG00000005217	Psen1	Enhancers_Heart_21915
ENSFDAG00000013852	Coq6	Enhancers_Heart_21978,Enhancers_Heart_21981
ENSFDAG00000008828	Entpd5	Enhancers_Heart_21978,Enhancers_Heart_21981
ENSFDAG00000008402	Isca2	Enhancers_Heart_22000,Enhancers_Heart_22001
ENSFDAG00000006949	Ltbp2	Enhancers_Heart_22000,Enhancers_Heart_22001
ENSFDAG00000018568	Ylpm1	Enhancers_Heart_22024
ENSFDAG00000007770	Prox2	Enhancers_Heart_22024
ENSFDAG00000015670	Rps6kl1	Enhancers_Heart_22032
ENSFDAG00000013712	Pgf	Enhancers_Heart_22032
ENSFDAG00000009281	Tmed10	Enhancers_Heart_22066,Enhancers_Heart_22069,Enhancers_Heart_22072,Enhancers_Heart_22073,Enhancers_Heart_22074
ENSFDAG00000008064	Fos	Enhancers_Heart_22066,Enhancers_Heart_22069,Enhancers_Heart_22072,Enhancers_Heart_22073,Enhancers_Heart_22074,Enhancers_Heart_22091
ENSFDAG00000011411	Jdp2	Enhancers_Heart_22091,Enhancers_Heart_22095
ENSFDAG00000007799	Batf	Enhancers_Heart_22095
ENSFDAG00000006571	Ttll5	Enhancers_Heart_22111,Enhancers_Heart_22115,Enhancers_Heart_22118
ENSFDAG00000000810	Tgfb3	Enhancers_Heart_22111,Enhancers_Heart_22115,Enhancers_Heart_22118
ENSFDAG00000001691	Esrrb	Enhancers_Heart_22185,Enhancers_Heart_22200
ENSFDAG00000004422	Vash1	Enhancers_Heart_22200
ENSFDAG00000008388	Ahsa1	Enhancers_Heart_22287
ENSFDAG00000000882	Sptlc2	Enhancers_Heart_22287
ENSFDAG00000001530	Flrt2	Enhancers_Heart_22364
ENSFDAG00000009846	Lypla1	Enhancers_Heart_22364,Enhancers_Heart_22370
ENSFDAG00000018850	Galc	Enhancers_Heart_22370
ENSFDAG00000003097	Gpr65	Enhancers_Heart_22378,Enhancers_Heart_22380,Enhancers_Heart_22381
ENSFDAG00000020307	Kcnk10	Enhancers_Heart_22378,Enhancers_Heart_22380,Enhancers_Heart_22381
ENSFDAG00000012841	Spata7	Enhancers_Heart_22392
ENSFDAG00000019212	Ptpn21	Enhancers_Heart_22392
ENSFDAG00000019081	Foxn3	Enhancers_Heart_22475
ENSFDAG00000010245	Efcab11	Enhancers_Heart_22475
ENSFDAG00000006958	Tdp1	Enhancers_Heart_22478
ENSFDAG00000010586	Kcnk13	Enhancers_Heart_22478,Enhancers_Heart_22482
ENSFDAG00000003198	N.A	Enhancers_Heart_22482
ENSFDAG00000008550	Psmc1	Enhancers_Heart_22492
ENSFDAG00000021350	Nrde2	Enhancers_Heart_22492
ENSFDAG00000014367	Calm1	Enhancers_Heart_22502,Enhancers_Heart_22546,Enhancers_Heart_22551,Enhancers_Heart_22561,Enhancers_Heart_22569
ENSFDAG00000020386	Ttc7b	Enhancers_Heart_22502,Enhancers_Heart_22546,Enhancers_Heart_22551,Enhancers_Heart_22561,Enhancers_Heart_22569
ENSFDAG00000020422	Rps6ka5	Enhancers_Heart_22603,Enhancers_Heart_22604
ENSFDAG00000019931	Gpr68	Enhancers_Heart_22603,Enhancers_Heart_22604,Enhancers_Heart_22615,Enhancers_Heart_22629
ENSFDAG00000009617	Ccdc88c	Enhancers_Heart_22615,Enhancers_Heart_22629
ENSFDAG00000010033	Tc2n	Enhancers_Heart_22650
ENSFDAG00000015791	Fbln5	Enhancers_Heart_22650
ENSFDAG00000007293	Slc24a4	Enhancers_Heart_22663
ENSFDAG00000005808	Rin3	Enhancers_Heart_22663
ENSFDAG00000014561	Ddx24	Enhancers_Heart_22774,Enhancers_Heart_22775
ENSFDAG00000011503	Ifi27	Enhancers_Heart_22774,Enhancers_Heart_22775
ENSFDAG00000021286	Vrk1	Enhancers_Heart_22852,Enhancers_Heart_22853,Enhancers_Heart_22854
ENSFDAG00000010370	Papola	Enhancers_Heart_22852,Enhancers_Heart_22853,Enhancers_Heart_22854
ENSFDAG00000013532	Setd3	Enhancers_Heart_22879
ENSFDAG00000015085	Ccnk	Enhancers_Heart_22885
ENSFDAG00000017903	Eml1	Enhancers_Heart_22920
ENSFDAG00000017097	Evl	Enhancers_Heart_22920
ENSFDAG00000010071	Ppp2r5c	Enhancers_Heart_22991,Enhancers_Heart_23019
ENSFDAG00000009932	Dync1h1	Enhancers_Heart_22991,Enhancers_Heart_23019
ENSFDAG00000009611	Pld4	Enhancers_Heart_23212
ENSFDAG00000008749	Clba1	Enhancers_Heart_23212,Enhancers_Heart_23217
ENSFDAG00000010260	Gpr132	Enhancers_Heart_23217
ENSFDAG00000001071	Dnah11	Enhancers_Heart_23349
ENSFDAG00000011412	Sp4	Enhancers_Heart_23349
ENSFDAG00000003104	Itgb8	Enhancers_Heart_23358,Enhancers_Heart_23375,Enhancers_Heart_23376,Enhancers_Heart_23377,Enhancers_Heart_23378
ENSFDAG00000020695	Abcb5	Enhancers_Heart_23358
ENSFDAG00000007539	Macc1	Enhancers_Heart_23375,Enhancers_Heart_23376,Enhancers_Heart_23377,Enhancers_Heart_23378
ENSFDAG00000012099	Tmem196	Enhancers_Heart_23381,Enhancers_Heart_23382
ENSFDAG00000014658	Asb13	Enhancers_Heart_23391
ENSFDAG00000017181	Net1	Enhancers_Heart_23391
ENSFDAG00000012934	Klf6	Enhancers_Heart_23438,Enhancers_Heart_23443,Enhancers_Heart_23469,Enhancers_Heart_23492,Enhancers_Heart_23512,Enhancers_Heart_23516,Enhancers_Heart_23522,Enhancers_Heart_23532,Enhancers_Heart_23536,Enhancers_Heart_23548,Enhancers_Heart_23550,Enhancers_Heart_23560
ENSFDAG00000008681	Akr1e1	Enhancers_Heart_23438,Enhancers_Heart_23443,Enhancers_Heart_23469,Enhancers_Heart_23492
ENSFDAG00000000659	Yme1l1	Enhancers_Heart_23512,Enhancers_Heart_23516,Enhancers_Heart_23522,Enhancers_Heart_23532,Enhancers_Heart_23536,Enhancers_Heart_23548,Enhancers_Heart_23550,Enhancers_Heart_23560
ENSFDAG00000008677	Pfkp	Enhancers_Heart_23573
ENSFDAG00000006072	Pitrm1	Enhancers_Heart_23573
ENSFDAG00000012048	Actn3	Enhancers_Heart_47477
ENSFDAG00000012249	AW209491	Enhancers_Heart_23765
ENSFDAG00000018863	Gli3	Enhancers_Heart_23765
ENSFDAG00000010983	Pou6f2	Enhancers_Heart_23804
ENSFDAG00000019462	Vps41	Enhancers_Heart_23804
ENSFDAG00000013608	Elmo1	Enhancers_Heart_23852
ENSFDAG00000002769	Aoah	Enhancers_Heart_23852
ENSFDAG00000007238	Ripor2	Enhancers_Heart_23910,Enhancers_Heart_23933
ENSFDAG00000018667	N.A	Enhancers_Heart_23910,Enhancers_Heart_23933
ENSFDAG00000021148	Cpb1	Enhancers_Heart_58338
ENSFDAG00000015160	Dusp22	Enhancers_Heart_24086,Enhancers_Heart_24094,Enhancers_Heart_24095
ENSFDAG00000016781	Irf4	Enhancers_Heart_24086,Enhancers_Heart_24094,Enhancers_Heart_24095
ENSFDAG00000001458	Exoc2	Enhancers_Heart_24105,Enhancers_Heart_24107,Enhancers_Heart_24109,Enhancers_Heart_24134,Enhancers_Heart_24135
ENSFDAG00000013920	Gmds	Enhancers_Heart_24134,Enhancers_Heart_24135
ENSFDAG00000015622	Wrnip1	Enhancers_Heart_24197
ENSFDAG00000005902	Serpinb1c	Enhancers_Heart_24197
ENSFDAG00000005660	Edn1	Enhancers_Heart_24673
ENSFDAG00000017560	Phactr1	Enhancers_Heart_24673,Enhancers_Heart_24696,Enhancers_Heart_24705,Enhancers_Heart_24706
ENSFDAG00000007124	Tbc1d7	Enhancers_Heart_24696,Enhancers_Heart_24705,Enhancers_Heart_24706,Enhancers_Heart_24728
ENSFDAG00000012748	Gfod1	Enhancers_Heart_24728
ENSFDAG00000000210	Btbd3	Enhancers_Heart_24840
ENSFDAG00000000295	Jarid2	Enhancers_Heart_24840,Enhancers_Heart_24891
ENSFDAG00000016277	Dtnbp1	Enhancers_Heart_24891
ENSFDAG00000018532	Fam120a	Enhancers_Heart_25124,Enhancers_Heart_25126,Enhancers_Heart_25127
ENSFDAG00000006886	Wnk2	Enhancers_Heart_25124,Enhancers_Heart_25126,Enhancers_Heart_25127
ENSFDAG00000014858	Fbxl18	Enhancers_Heart_74419
ENSFDAG00000021114	Gadd45g	Enhancers_Heart_25292
ENSFDAG00000020998	Diras2	Enhancers_Heart_25292
ENSFDAG00000019977	Syk	Enhancers_Heart_25330
ENSFDAG00000006707	Auh	Enhancers_Heart_25330
ENSFDAG00000000997	Nfil3	Enhancers_Heart_25364
ENSFDAG00000013494	Ror2	Enhancers_Heart_25364
ENSFDAG00000012390	Hrh2	Enhancers_Heart_25395
ENSFDAG00000014890	Sfxn1	Enhancers_Heart_25395
ENSFDAG00000011594	Cplx2	Enhancers_Heart_25425
ENSFDAG00000015062	Thoc3	Enhancers_Heart_25425
ENSFDAG00000000193	Nop16	Enhancers_Heart_25435
ENSFDAG00000019026	Cltb	Enhancers_Heart_25435
ENSFDAG00000014926	Higd2a	Enhancers_Heart_25435
ENSFDAG00000013332	Unc5a	Enhancers_Heart_25452,Enhancers_Heart_25454
ENSFDAG00000016554	Tspan17	Enhancers_Heart_25452,Enhancers_Heart_25454
ENSFDAG00000018858	Dbn1	Enhancers_Heart_25475
ENSFDAG00000019044	Pitx1	Enhancers_Heart_25489
ENSFDAG00000006160	Pfdn1	Enhancers_Heart_25489,Enhancers_Heart_25495
ENSFDAG00000009293	Macroh2a1	Enhancers_Heart_25495
ENSFDAG00000016851	Smad5	Enhancers_Heart_25557
ENSFDAG00000016932	N.A	Enhancers_Heart_25557
ENSFDAG00000007066	Agtpbp1	Enhancers_Heart_25620,Enhancers_Heart_25625
ENSFDAG00000016244	Ntrk2	Enhancers_Heart_25620,Enhancers_Heart_25625
ENSFDAG00000002315	Tut7	Enhancers_Heart_25663
ENSFDAG00000016479	Dapk1	Enhancers_Heart_25663
ENSFDAG00000008124	N.A	Enhancers_Heart_25789
ENSFDAG00000006447	Fbp2	Enhancers_Heart_25789
ENSFDAG00000009462	Aopep	Enhancers_Heart_25798,Enhancers_Heart_25806,Enhancers_Heart_25815,Enhancers_Heart_25828,Enhancers_Heart_25829,Enhancers_Heart_25875
ENSFDAG00000018149	Fancc	Enhancers_Heart_25798,Enhancers_Heart_25806,Enhancers_Heart_25815,Enhancers_Heart_25828,Enhancers_Heart_25829,Enhancers_Heart_25875
ENSFDAG00000000805	Ercc6l2	Enhancers_Heart_25888
ENSFDAG00000010517	Hsd17b3	Enhancers_Heart_25888
ENSFDAG00000011255	Habp4	Enhancers_Heart_25909
ENSFDAG00000019333	Cdc14b	Enhancers_Heart_25909,Enhancers_Heart_25918
ENSFDAG00000018974	Prxl2c	Enhancers_Heart_25918
ENSFDAG00000012183	Rybp	Enhancers_Heart_78164,Enhancers_Heart_78177
ENSFDAG00000013330	Ptdss1	Enhancers_Heart_32462
ENSFDAG00000007257	Sdc2	Enhancers_Heart_32462
ENSFDAG00000015987	Ube2ql1	Enhancers_Heart_25953
ENSFDAG00000016588	Med10	Enhancers_Heart_25953
ENSFDAG00000008302	Adamts16	Enhancers_Heart_25976
ENSFDAG00000013041	Irx4	Enhancers_Heart_25999
ENSFDAG00000019198	Ndufs6	Enhancers_Heart_25999
ENSFDAG00000017509	Ell2	Enhancers_Heart_26071,Enhancers_Heart_26072
ENSFDAG00000018767	Glrx	Enhancers_Heart_26071,Enhancers_Heart_26072,Enhancers_Heart_26083
ENSFDAG00000018224	Rhobtb3	Enhancers_Heart_26083
ENSFDAG00000020969	Mctp1	Enhancers_Heart_26093,Enhancers_Heart_26101,Enhancers_Heart_26102,Enhancers_Heart_26104
ENSFDAG00000009364	Fam81b	Enhancers_Heart_26093,Enhancers_Heart_26101
ENSFDAG00000004329	Slf1	Enhancers_Heart_26102,Enhancers_Heart_26104
ENSFDAG00000013922	Nr2f1	Enhancers_Heart_26114
ENSFDAG00000009114	N.A	Enhancers_Heart_26114
ENSFDAG00000016268	Adgrv1	Enhancers_Heart_26153,Enhancers_Heart_26154,Enhancers_Heart_26155,Enhancers_Heart_26156,Enhancers_Heart_26161,Enhancers_Heart_26176
ENSFDAG00000021224	Cetn3	Enhancers_Heart_26187,Enhancers_Heart_26195,Enhancers_Heart_26212,Enhancers_Heart_26213
ENSFDAG00000008970	Mef2c	Enhancers_Heart_26195,Enhancers_Heart_26212,Enhancers_Heart_26213,Enhancers_Heart_26227,Enhancers_Heart_26239,Enhancers_Heart_26247,Enhancers_Heart_26248
ENSFDAG00000012214	Tmem161b	Enhancers_Heart_26227,Enhancers_Heart_26239,Enhancers_Heart_26247,Enhancers_Heart_26248
ENSFDAG00000007716	Cox7c	Enhancers_Heart_26254
ENSFDAG00000017951	N.A	Enhancers_Heart_26254
ENSFDAG00000009289	Atp6ap1l	Enhancers_Heart_26300,Enhancers_Heart_26301,Enhancers_Heart_26302
ENSFDAG00000008314	Rps23	Enhancers_Heart_26300,Enhancers_Heart_26301,Enhancers_Heart_26302,Enhancers_Heart_26322,Enhancers_Heart_26323
ENSFDAG00000000678	Atg10	Enhancers_Heart_26322,Enhancers_Heart_26323
ENSFDAG00000018893	Ckmt2	Enhancers_Heart_26358,Enhancers_Heart_26361
ENSFDAG00000001009	Rasgrf2	Enhancers_Heart_26358,Enhancers_Heart_26361
ENSFDAG00000018125	Arsb	Enhancers_Heart_26432,Enhancers_Heart_26478
ENSFDAG00000012313	Lhfpl2	Enhancers_Heart_26432,Enhancers_Heart_26478
ENSFDAG00000011076	Enc1	Enhancers_Heart_26568
ENSFDAG00000014089	Arhgef28	Enhancers_Heart_26568
ENSFDAG00000008515	Zfp366	Enhancers_Heart_26710,Enhancers_Heart_26712
ENSFDAG00000011101	Mrps27	Enhancers_Heart_26710,Enhancers_Heart_26712
ENSFDAG00000009775	Map1b	Enhancers_Heart_26733,Enhancers_Heart_26741,Enhancers_Heart_26750,Enhancers_Heart_26761,Enhancers_Heart_26763,Enhancers_Heart_26764,Enhancers_Heart_26765,Enhancers_Heart_26766,Enhancers_Heart_26769
ENSFDAG00000018461	Ptcd2	Enhancers_Heart_26733,Enhancers_Heart_26741,Enhancers_Heart_26750
ENSFDAG00000010257	Cartpt	Enhancers_Heart_26761,Enhancers_Heart_26763,Enhancers_Heart_26764,Enhancers_Heart_26765,Enhancers_Heart_26766,Enhancers_Heart_26769
ENSFDAG00000008095	Pik3r1	Enhancers_Heart_26806,Enhancers_Heart_26841,Enhancers_Heart_26856,Enhancers_Heart_26857,Enhancers_Heart_26861,Enhancers_Heart_26886,Enhancers_Heart_26888,Enhancers_Heart_26889,Enhancers_Heart_26893,Enhancers_Heart_26897,Enhancers_Heart_26899
ENSFDAG00000013245	Slc30a5	Enhancers_Heart_26806
ENSFDAG00000007382	N.A	Enhancers_Heart_26841,Enhancers_Heart_26856,Enhancers_Heart_26857,Enhancers_Heart_26861,Enhancers_Heart_26886,Enhancers_Heart_26888,Enhancers_Heart_26889,Enhancers_Heart_26893,Enhancers_Heart_26897,Enhancers_Heart_26899
ENSFDAG00000003064	Cd180	Enhancers_Heart_26936,Enhancers_Heart_26937,Enhancers_Heart_26938,Enhancers_Heart_26942,Enhancers_Heart_26945
ENSFDAG00000018643	Dpm1	Enhancers_Heart_26936,Enhancers_Heart_26937,Enhancers_Heart_26938,Enhancers_Heart_26942,Enhancers_Heart_26945
ENSFDAG00000004130	Mast4	Enhancers_Heart_26961,Enhancers_Heart_27017,Enhancers_Heart_27018,Enhancers_Heart_27019,Enhancers_Heart_27026,Enhancers_Heart_27028,Enhancers_Heart_27029
ENSFDAG00000017844	N.A	Enhancers_Heart_26961,Enhancers_Heart_27017,Enhancers_Heart_27018,Enhancers_Heart_27019,Enhancers_Heart_27026,Enhancers_Heart_27028,Enhancers_Heart_27029
ENSFDAG00000012502	Erbin	Enhancers_Heart_27042
ENSFDAG00000009313	Nln	Enhancers_Heart_27042
ENSFDAG00000017386	Shisal2b	Enhancers_Heart_27061,Enhancers_Heart_27062
ENSFDAG00000011060	Srek1ip1	Enhancers_Heart_27061,Enhancers_Heart_27062
ENSFDAG00000020845	Gpbp1	Enhancers_Heart_27202,Enhancers_Heart_27205
ENSFDAG00000015297	Plk2	Enhancers_Heart_27202,Enhancers_Heart_27205
ENSFDAG00000018963	Plpp1	Enhancers_Heart_27318,Enhancers_Heart_27319
ENSFDAG00000011098	Slc38a9	Enhancers_Heart_27318
ENSFDAG00000006079	Gpx8	Enhancers_Heart_27326
ENSFDAG00000016762	Cdc20b	Enhancers_Heart_27326
ENSFDAG00000004664	Arl15	Enhancers_Heart_27395
ENSFDAG00000017757	Ndufs4	Enhancers_Heart_27395
ENSFDAG00000020445	Rtraf	Enhancers_Heart_28027
ENSFDAG00000010142	Flnb	Enhancers_Heart_27531,Enhancers_Heart_27544,Enhancers_Heart_27551
ENSFDAG00000019863	Dnase1l3	Enhancers_Heart_27531,Enhancers_Heart_27544,Enhancers_Heart_27551
ENSFDAG00000001078	Abhd6	Enhancers_Heart_27557
ENSFDAG00000012868	Kctd6	Enhancers_Heart_27577,Enhancers_Heart_27578
ENSFDAG00000009626	Cfap20dc	Enhancers_Heart_27601
ENSFDAG00000008999	Psmd6	Enhancers_Heart_77666,Enhancers_Heart_77667,Enhancers_Heart_77672,Enhancers_Heart_77677,Enhancers_Heart_77678,Enhancers_Heart_77683
ENSFDAG00000015020	Eomes	Enhancers_Heart_27772
ENSFDAG00000007406	N.A	Enhancers_Heart_27772
ENSFDAG00000010177	Nek10	Enhancers_Heart_27793,Enhancers_Heart_27795
ENSFDAG00000015720	Top2b	Enhancers_Heart_27832,Enhancers_Heart_27833,Enhancers_Heart_27834,Enhancers_Heart_27845,Enhancers_Heart_27846,Enhancers_Heart_27869,Enhancers_Heart_27870
ENSFDAG00000006096	Rarb	Enhancers_Heart_27832,Enhancers_Heart_27833,Enhancers_Heart_27834,Enhancers_Heart_27845,Enhancers_Heart_27846,Enhancers_Heart_27869,Enhancers_Heart_27870,Enhancers_Heart_27884,Enhancers_Heart_27886,Enhancers_Heart_27887,Enhancers_Heart_27895,Enhancers_Heart_27899,Enhancers_Heart_27923,Enhancers_Heart_27925
ENSFDAG00000014810	Thrb	Enhancers_Heart_27884,Enhancers_Heart_27886,Enhancers_Heart_27887,Enhancers_Heart_27895,Enhancers_Heart_27899,Enhancers_Heart_27923,Enhancers_Heart_27925,Enhancers_Heart_27935,Enhancers_Heart_27941,Enhancers_Heart_27942,Enhancers_Heart_27943,Enhancers_Heart_27950,Enhancers_Heart_27951,Enhancers_Heart_27960,Enhancers_Heart_27965
ENSFDAG00000017064	Nr1d2	Enhancers_Heart_27941,Enhancers_Heart_27942,Enhancers_Heart_27943,Enhancers_Heart_27950,Enhancers_Heart_27951,Enhancers_Heart_27960,Enhancers_Heart_27965
ENSFDAG00000005436	Ube2e2	Enhancers_Heart_27971,Enhancers_Heart_27994
ENSFDAG00000006146	Ube2e1	Enhancers_Heart_27971,Enhancers_Heart_27994
ENSFDAG00000011780	Nid2	Enhancers_Heart_28027
ENSFDAG00000006993	Kcnk5	Enhancers_Heart_41286,Enhancers_Heart_41295,Enhancers_Heart_41296,Enhancers_Heart_41299
ENSFDAG00000012714	Ipo5	Enhancers_Heart_31534
ENSFDAG00000006025	Farp1	Enhancers_Heart_31534,Enhancers_Heart_31560
ENSFDAG00000010470	N.A	Enhancers_Heart_30445,Enhancers_Heart_30446,Enhancers_Heart_30450
ENSFDAG00000008551	Lrmda	Enhancers_Heart_28265,Enhancers_Heart_28271,Enhancers_Heart_28291,Enhancers_Heart_28292
ENSFDAG00000008207	Kcnma1	Enhancers_Heart_28265,Enhancers_Heart_28271,Enhancers_Heart_28291,Enhancers_Heart_28292
ENSFDAG00000013783	N.A	Enhancers_Heart_28306
ENSFDAG00000019362	Dlg5	Enhancers_Heart_28306
ENSFDAG00000011718	Zmiz1	Enhancers_Heart_28319,Enhancers_Heart_28320,Enhancers_Heart_28323,Enhancers_Heart_28329,Enhancers_Heart_28339,Enhancers_Heart_28340,Enhancers_Heart_28382,Enhancers_Heart_28481,Enhancers_Heart_28486,Enhancers_Heart_28496
ENSFDAG00000014880	Ppif	Enhancers_Heart_28481,Enhancers_Heart_28486,Enhancers_Heart_28496,Enhancers_Heart_28512,Enhancers_Heart_28513,Enhancers_Heart_28521
ENSFDAG00000007741	Zcchc24	Enhancers_Heart_28512,Enhancers_Heart_28513,Enhancers_Heart_28521
ENSFDAG00000013436	N.A	Enhancers_Heart_28571
ENSFDAG00000007627	Slmap	Enhancers_Heart_28584
ENSFDAG00000001390	Dennd6a	Enhancers_Heart_28584
ENSFDAG00000016114	Il17rd	Enhancers_Heart_28596
ENSFDAG00000006138	Appl1	Enhancers_Heart_28596
ENSFDAG00000003424	Prkar2a	Enhancers_Heart_28652
ENSFDAG00000020716	Eif1	Enhancers_Heart_28690
ENSFDAG00000018321	Erc2	Enhancers_Heart_28690
ENSFDAG00000005890	Wnt5a	Enhancers_Heart_28695,Enhancers_Heart_28697,Enhancers_Heart_28698
ENSFDAG00000002978	N.A	Enhancers_Heart_28695,Enhancers_Heart_28697,Enhancers_Heart_28698
ENSFDAG00000003319	Pbrm1	Enhancers_Heart_28795
ENSFDAG00000015739	Smim4	Enhancers_Heart_28795
ENSFDAG00000015321	Nt5dc2	Enhancers_Heart_28808,Enhancers_Heart_28810
ENSFDAG00000003427	Stab1	Enhancers_Heart_28808,Enhancers_Heart_28810
ENSFDAG00000002598	Sema3g	Enhancers_Heart_28829
ENSFDAG00000001158	Phf7	Enhancers_Heart_28829
ENSFDAG00000010364	Capn7	Enhancers_Heart_28847
ENSFDAG00000003605	Sh3bp5	Enhancers_Heart_28847
ENSFDAG00000010444	Colq	Enhancers_Heart_28877
ENSFDAG00000016442	Eaf1	Enhancers_Heart_28877
ENSFDAG00000017504	Oxnad1	Enhancers_Heart_41329,Enhancers_Heart_41350
ENSFDAG00000002171	Rftn1	Enhancers_Heart_41329,Enhancers_Heart_41350
ENSFDAG00000003275	Npy4r	Enhancers_Heart_29034
ENSFDAG00000015003	Gprin2	Enhancers_Heart_29034
ENSFDAG00000015595	Bmpr1a	Enhancers_Heart_29061,Enhancers_Heart_29065,Enhancers_Heart_29084
ENSFDAG00000003042	Ldb3	Enhancers_Heart_29061,Enhancers_Heart_29065,Enhancers_Heart_29084
ENSFDAG00000018223	Ccser2	Enhancers_Heart_29099
ENSFDAG00000018474	Ghitm	Enhancers_Heart_29118,Enhancers_Heart_29119,Enhancers_Heart_29120
ENSFDAG00000006455	Nrg3	Enhancers_Heart_29118,Enhancers_Heart_29119,Enhancers_Heart_29120
ENSFDAG00000017914	Txndc16	Enhancers_Heart_29155,Enhancers_Heart_29158,Enhancers_Heart_29161
ENSFDAG00000009902	Ptger2	Enhancers_Heart_29155,Enhancers_Heart_29158,Enhancers_Heart_29161
ENSFDAG00000017745	Psmc6	Enhancers_Heart_29167
ENSFDAG00000012317	N.A	Enhancers_Heart_29167
ENSFDAG00000007738	Ddhd1	Enhancers_Heart_29220
ENSFDAG00000009044	Bmp4	Enhancers_Heart_29220,Enhancers_Heart_29243,Enhancers_Heart_29252
ENSFDAG00000010113	Cdkn3	Enhancers_Heart_29243,Enhancers_Heart_29252
ENSFDAG00000017942	Samd4	Enhancers_Heart_29271,Enhancers_Heart_29283,Enhancers_Heart_29312,Enhancers_Heart_29323,Enhancers_Heart_29324
ENSFDAG00000009760	Cgrrf1	Enhancers_Heart_29271,Enhancers_Heart_29283
ENSFDAG00000015537	Gch1	Enhancers_Heart_29312,Enhancers_Heart_29323,Enhancers_Heart_29324
ENSFDAG00000007667	Otx2	Enhancers_Heart_29421,Enhancers_Heart_29422,Enhancers_Heart_29423,Enhancers_Heart_29424
ENSFDAG00000013663	Nck1	Enhancers_Heart_29421,Enhancers_Heart_29422,Enhancers_Heart_29423,Enhancers_Heart_29424
ENSFDAG00000019078	Trdc	Enhancers_Heart_29500
ENSFDAG00000011418	Dad1	Enhancers_Heart_29500
ENSFDAG00000007407	Lrp10	Enhancers_Heart_29533
ENSFDAG00000019563	Mmp14	Enhancers_Heart_29533
ENSFDAG00000020152	Cebpe	Enhancers_Heart_29554,Enhancers_Heart_29559
ENSFDAG00000007896	Slc7a8	Enhancers_Heart_29554,Enhancers_Heart_29559
ENSFDAG00000001239	Cmtm5	Enhancers_Heart_29581
ENSFDAG00000005073	Myh6	Enhancers_Heart_29581
ENSFDAG00000011611	Ngdn	Enhancers_Heart_29595
ENSFDAG00000020952	Zfhx2	Enhancers_Heart_29595
ENSFDAG00000017307	N.A	Enhancers_Heart_29627
ENSFDAG00000021332	N.A	Enhancers_Heart_29627
ENSFDAG00000016654	Cryl1	Enhancers_Heart_29651
ENSFDAG00000017663	Gjb6	Enhancers_Heart_29651
ENSFDAG00000012025	Fgf9	Enhancers_Heart_29719
ENSFDAG00000007235	Mipep	Enhancers_Heart_29804
ENSFDAG00000015078	Tmem30a	Enhancers_Heart_29804
ENSFDAG00000005187	Tnfrsf19	Enhancers_Heart_29820
ENSFDAG00000021227	Sacs	Enhancers_Heart_29820
ENSFDAG00000015010	Dleu7	Enhancers_Heart_29870,Enhancers_Heart_29876
ENSFDAG00000011244	Trim13	Enhancers_Heart_29870,Enhancers_Heart_29876
ENSFDAG00000018324	Ints6	Enhancers_Heart_29922
ENSFDAG00000011464	Wdfy2	Enhancers_Heart_29922
ENSFDAG00000005671	Gata4	Enhancers_Heart_29948,Enhancers_Heart_29958
ENSFDAG00000019069	Blk	Enhancers_Heart_29948,Enhancers_Heart_29958
ENSFDAG00000007827	Kif13b	Enhancers_Heart_30061,Enhancers_Heart_30062,Enhancers_Heart_30081
ENSFDAG00000015770	Hmbox1	Enhancers_Heart_30061,Enhancers_Heart_30062,Enhancers_Heart_30081
ENSFDAG00000021050	Ints9	Enhancers_Heart_30098
ENSFDAG00000015092	Extl3	Enhancers_Heart_30098
ENSFDAG00000008809	Scara5	Enhancers_Heart_30170,Enhancers_Heart_30173,Enhancers_Heart_30177
ENSFDAG00000017555	Pbk	Enhancers_Heart_30170,Enhancers_Heart_30173,Enhancers_Heart_30177
ENSFDAG00000019264	Ccdc25	Enhancers_Heart_30183,Enhancers_Heart_30187
ENSFDAG00000008776	Scara3	Enhancers_Heart_30183,Enhancers_Heart_30187
ENSFDAG00000003680	Ptk2b	Enhancers_Heart_30210
ENSFDAG00000005035	Trim35	Enhancers_Heart_30210
ENSFDAG00000011423	Adra1a	Enhancers_Heart_30228,Enhancers_Heart_30232,Enhancers_Heart_30235,Enhancers_Heart_30243
ENSFDAG00000001091	Dpysl2	Enhancers_Heart_30228,Enhancers_Heart_30232,Enhancers_Heart_30235,Enhancers_Heart_30243
ENSFDAG00000011429	Ppp2r2a	Enhancers_Heart_30289
ENSFDAG00000017132	Gnrh1	Enhancers_Heart_30380
ENSFDAG00000017465	Dock5	Enhancers_Heart_30380
ENSFDAG00000010631	N.A	Enhancers_Heart_30388,Enhancers_Heart_30389
ENSFDAG00000007371	Adam7	Enhancers_Heart_30388,Enhancers_Heart_30389
ENSFDAG00000016240	Stc1	Enhancers_Heart_30408
ENSFDAG00000011985	Slc25a37	Enhancers_Heart_30408
ENSFDAG00000020057	Entpd4b	Enhancers_Heart_30414
ENSFDAG00000009730	Vps26b	Enhancers_Heart_30414
ENSFDAG00000011046	Loxl2	Enhancers_Heart_30419,Enhancers_Heart_30425,Enhancers_Heart_30432
ENSFDAG00000001572	R3hcc1	Enhancers_Heart_30419,Enhancers_Heart_30425,Enhancers_Heart_30432
ENSFDAG00000003444	Rhobtb2	Enhancers_Heart_30445,Enhancers_Heart_30446,Enhancers_Heart_30450
ENSFDAG00000004856	Bin3	Enhancers_Heart_30483
ENSFDAG00000017209	Ccar2	Enhancers_Heart_30483,Enhancers_Heart_30484
ENSFDAG00000002003	Sorbs3	Enhancers_Heart_30498,Enhancers_Heart_30499,Enhancers_Heart_30501
ENSFDAG00000011549	Ppp3cc	Enhancers_Heart_30498,Enhancers_Heart_30499,Enhancers_Heart_30501,Enhancers_Heart_30510
ENSFDAG00000017772	Slc39a14	Enhancers_Heart_30510
ENSFDAG00000000848	Phyhip	Enhancers_Heart_30535,Enhancers_Heart_30536
ENSFDAG00000017022	Bmp1	Enhancers_Heart_30535,Enhancers_Heart_30536
ENSFDAG00000016294	Nudt18	Enhancers_Heart_30553
ENSFDAG00000007242	Fhip2b	Enhancers_Heart_30553
ENSFDAG00000018971	Gfra2	Enhancers_Heart_30575,Enhancers_Heart_30576,Enhancers_Heart_30579,Enhancers_Heart_30583,Enhancers_Heart_30585
ENSFDAG00000014108	Lzts1	Enhancers_Heart_87716
ENSFDAG00000008673	Gpalpp1	Enhancers_Heart_30767
ENSFDAG00000008835	Tsc22d1	Enhancers_Heart_30767,Enhancers_Heart_30780
ENSFDAG00000013099	N.A	Enhancers_Heart_30780
ENSFDAG00000011261	Ccdc122	Enhancers_Heart_30864,Enhancers_Heart_30868,Enhancers_Heart_30869,Enhancers_Heart_30870,Enhancers_Heart_30871,Enhancers_Heart_30873,Enhancers_Heart_30885,Enhancers_Heart_30886,Enhancers_Heart_30887,Enhancers_Heart_30892,Enhancers_Heart_30893,Enhancers_Heart_30897,Enhancers_Heart_30905
ENSFDAG00000014122	Enox1	Enhancers_Heart_30864,Enhancers_Heart_30868,Enhancers_Heart_30869,Enhancers_Heart_30870,Enhancers_Heart_30871,Enhancers_Heart_30873,Enhancers_Heart_30885,Enhancers_Heart_30886,Enhancers_Heart_30887,Enhancers_Heart_30892,Enhancers_Heart_30893,Enhancers_Heart_30897,Enhancers_Heart_30905,Enhancers_Heart_30920,Enhancers_Heart_30921,Enhancers_Heart_30926,Enhancers_Heart_30927,Enhancers_Heart_30929
ENSFDAG00000015900	Dnajc15	Enhancers_Heart_30920,Enhancers_Heart_30921,Enhancers_Heart_30926,Enhancers_Heart_30927,Enhancers_Heart_30929
ENSFDAG00000008562	Epsti1	Enhancers_Heart_30939,Enhancers_Heart_30940
ENSFDAG00000021377	Fam216b	Enhancers_Heart_30939,Enhancers_Heart_30940,Enhancers_Heart_30948,Enhancers_Heart_30950
ENSFDAG00000010109	Tnfsf11	Enhancers_Heart_30948,Enhancers_Heart_30950
ENSFDAG00000018242	Diaph3	Enhancers_Heart_31088,Enhancers_Heart_31092
ENSFDAG00000014197	Dach1	Enhancers_Heart_31144,Enhancers_Heart_31147
ENSFDAG00000016309	Klf5	Enhancers_Heart_31171
ENSFDAG00000004922	Klf12	Enhancers_Heart_31171,Enhancers_Heart_31187,Enhancers_Heart_31192,Enhancers_Heart_31193,Enhancers_Heart_31194
ENSFDAG00000018430	Tbc1d4	Enhancers_Heart_31192,Enhancers_Heart_31193,Enhancers_Heart_31194,Enhancers_Heart_31207
ENSFDAG00000017731	Lmo7	Enhancers_Heart_31232,Enhancers_Heart_31233,Enhancers_Heart_31238,Enhancers_Heart_31240,Enhancers_Heart_31268
ENSFDAG00000008161	N.A	Enhancers_Heart_31232,Enhancers_Heart_31233,Enhancers_Heart_31238,Enhancers_Heart_31240,Enhancers_Heart_31268,Enhancers_Heart_31270,Enhancers_Heart_31271,Enhancers_Heart_31272
ENSFDAG00000018712	Acod1	Enhancers_Heart_31270,Enhancers_Heart_31271,Enhancers_Heart_31272
ENSFDAG00000014032	Ednrb	Enhancers_Heart_31326,Enhancers_Heart_31327
ENSFDAG00000010700	Pou4f1	Enhancers_Heart_31326,Enhancers_Heart_31327
ENSFDAG00000004227	Ndfip2	Enhancers_Heart_31335
ENSFDAG00000021428	Glul	Enhancers_Heart_31335
ENSFDAG00000017883	Spry2	Enhancers_Heart_31379,Enhancers_Heart_31380
ENSFDAG00000007441	Samd12	Enhancers_Heart_33101,Enhancers_Heart_33102,Enhancers_Heart_33104,Enhancers_Heart_33114,Enhancers_Heart_33116
ENSFDAG00000012650	Ext1	Enhancers_Heart_33033,Enhancers_Heart_33034,Enhancers_Heart_33053,Enhancers_Heart_33055,Enhancers_Heart_33101,Enhancers_Heart_33102,Enhancers_Heart_33104
ENSFDAG00000018390	N.A	Enhancers_Heart_31560
ENSFDAG00000012370	Slc15a1	Enhancers_Heart_31601
ENSFDAG00000003230	Dock9	Enhancers_Heart_31601
ENSFDAG00000013319	Osmr	Enhancers_Heart_31817,Enhancers_Heart_31822,Enhancers_Heart_31835
ENSFDAG00000016962	Rictor	Enhancers_Heart_31817
ENSFDAG00000014081	Lifr	Enhancers_Heart_31822,Enhancers_Heart_31835,Enhancers_Heart_31878,Enhancers_Heart_31880,Enhancers_Heart_31883
ENSFDAG00000010379	Egflam	Enhancers_Heart_31878,Enhancers_Heart_31880,Enhancers_Heart_31883
ENSFDAG00000016486	Gdnf	Enhancers_Heart_31886
ENSFDAG00000018176	Nipbl	Enhancers_Heart_31894
ENSFDAG00000006649	Cplane1	Enhancers_Heart_31894
ENSFDAG00000000130	C1qtnf3	Enhancers_Heart_31936
ENSFDAG00000017179	Sub1	Enhancers_Heart_31985
ENSFDAG00000012993	Zfr	Enhancers_Heart_31985
ENSFDAG00000019066	Pdzd2	Enhancers_Heart_32037
ENSFDAG00000016738	N.A	Enhancers_Heart_32037
ENSFDAG00000007842	Cdh6	Enhancers_Heart_32099
ENSFDAG00000012076	Cpne2	Enhancers_Heart_32105
ENSFDAG00000014095	Nlrc5	Enhancers_Heart_32105
ENSFDAG00000012524	Marchf11	Enhancers_Heart_32192,Enhancers_Heart_32200
ENSFDAG00000008528	Fbxl7	Enhancers_Heart_32192,Enhancers_Heart_32200,Enhancers_Heart_32221,Enhancers_Heart_32224,Enhancers_Heart_32226
ENSFDAG00000003009	Ank	Enhancers_Heart_32221,Enhancers_Heart_32224,Enhancers_Heart_32226
ENSFDAG00000008859	Trio	Enhancers_Heart_32388
ENSFDAG00000012600	Dnah5	Enhancers_Heart_32388
ENSFDAG00000018536	Ctnnd2	Enhancers_Heart_32397
ENSFDAG00000016950	Dap	Enhancers_Heart_32397
ENSFDAG00000015943	Sema5a	Enhancers_Heart_32444,Enhancers_Heart_32456
ENSFDAG00000014496	Mtrr	Enhancers_Heart_32456
ENSFDAG00000018006	Nipal2	Enhancers_Heart_32548
ENSFDAG00000019791	Kcns2	Enhancers_Heart_32548,Enhancers_Heart_32553,Enhancers_Heart_32570
ENSFDAG00000017855	Stk3	Enhancers_Heart_32553,Enhancers_Heart_32570
ENSFDAG00000015031	Cox6c	Enhancers_Heart_32574
ENSFDAG00000007917	Vps13b	Enhancers_Heart_32574
ENSFDAG00000018246	Ankrd46	Enhancers_Heart_32624
ENSFDAG00000006667	Rnf19a	Enhancers_Heart_32624
ENSFDAG00000014789	Zfp706	Enhancers_Heart_32663,Enhancers_Heart_32678
ENSFDAG00000009137	Ywhaz	Enhancers_Heart_32663
ENSFDAG00000004200	Igfbp7	Enhancers_Heart_71654
ENSFDAG00000018411	N.A	Enhancers_Heart_32678
ENSFDAG00000014817	Ncald	Enhancers_Heart_32692,Enhancers_Heart_32693,Enhancers_Heart_32715,Enhancers_Heart_32722
ENSFDAG00000009862	Grhl2	Enhancers_Heart_32692,Enhancers_Heart_32693,Enhancers_Heart_32715,Enhancers_Heart_32722,Enhancers_Heart_33223
ENSFDAG00000016316	Lrp12	Enhancers_Heart_32815,Enhancers_Heart_32844,Enhancers_Heart_32850,Enhancers_Heart_32851,Enhancers_Heart_32852,Enhancers_Heart_32853,Enhancers_Heart_32854,Enhancers_Heart_32866
ENSFDAG00000005377	Zfpm2	Enhancers_Heart_32815,Enhancers_Heart_32844,Enhancers_Heart_32850,Enhancers_Heart_32851,Enhancers_Heart_32852,Enhancers_Heart_32853,Enhancers_Heart_32854,Enhancers_Heart_32866
ENSFDAG00000013715	Oxr1	Enhancers_Heart_32872,Enhancers_Heart_32873
ENSFDAG00000001218	Abra	Enhancers_Heart_32872,Enhancers_Heart_32873,Enhancers_Heart_32896,Enhancers_Heart_32901,Enhancers_Heart_32931,Enhancers_Heart_32932
ENSFDAG00000006826	Angpt1	Enhancers_Heart_32896,Enhancers_Heart_32901,Enhancers_Heart_32931,Enhancers_Heart_32932,Enhancers_Heart_32952
ENSFDAG00000017927	Rspo2	Enhancers_Heart_32952
ENSFDAG00000012210	Emc2	Enhancers_Heart_58273
ENSFDAG00000002233	Sybu	Enhancers_Heart_32985
ENSFDAG00000019050	Kcnv1	Enhancers_Heart_32985
ENSFDAG00000012104	Trps1	Enhancers_Heart_32990,Enhancers_Heart_32993,Enhancers_Heart_33003
ENSFDAG00000011110	N.A	Enhancers_Heart_33003
ENSFDAG00000005846	Rad21	Enhancers_Heart_33028,Enhancers_Heart_33029
ENSFDAG00000021034	Utp23	Enhancers_Heart_33028,Enhancers_Heart_33029
ENSFDAG00000006525	Med30	Enhancers_Heart_33033,Enhancers_Heart_33034,Enhancers_Heart_33053,Enhancers_Heart_33055
ENSFDAG00000020369	Tnfrsf11b	Enhancers_Heart_33114,Enhancers_Heart_33116
ENSFDAG00000007034	Sntb1	Enhancers_Heart_33223
ENSFDAG00000016248	Has2	Enhancers_Heart_33237,Enhancers_Heart_33239
ENSFDAG00000000438	N.A	Enhancers_Heart_33237,Enhancers_Heart_33239
ENSFDAG00000010355	Fbxo32	Enhancers_Heart_33301,Enhancers_Heart_33305,Enhancers_Heart_33334,Enhancers_Heart_33335
ENSFDAG00000017120	Wdyhv1	Enhancers_Heart_33301,Enhancers_Heart_33305
ENSFDAG00000014085	Klhl38	Enhancers_Heart_33334,Enhancers_Heart_33335,Enhancers_Heart_33345
ENSFDAG00000006548	N.A	Enhancers_Heart_33345
ENSFDAG00000003049	Tmem65	Enhancers_Heart_33373
ENSFDAG00000017060	Fer1l6	Enhancers_Heart_33373
ENSFDAG00000007665	Tatdn1	Enhancers_Heart_33393
ENSFDAG00000006848	Trib1	Enhancers_Heart_33520,Enhancers_Heart_33524
ENSFDAG00000017112	Lratd2	Enhancers_Heart_33520,Enhancers_Heart_33524,Enhancers_Heart_33549,Enhancers_Heart_33556
ENSFDAG00000004839	Myc	Enhancers_Heart_33563,Enhancers_Heart_33564
ENSFDAG00000015327	N.A	Enhancers_Heart_33563,Enhancers_Heart_33564,Enhancers_Heart_33619,Enhancers_Heart_33620,Enhancers_Heart_33624,Enhancers_Heart_33629,Enhancers_Heart_33645,Enhancers_Heart_33646
ENSFDAG00000010798	Cyrib	Enhancers_Heart_33645,Enhancers_Heart_33646,Enhancers_Heart_33663,Enhancers_Heart_33664
ENSFDAG00000011773	Asap1	Enhancers_Heart_33663,Enhancers_Heart_33664,Enhancers_Heart_33720,Enhancers_Heart_33728
ENSFDAG00000012391	Adcy8	Enhancers_Heart_33720,Enhancers_Heart_33728
ENSFDAG00000020943	Hdac7	Enhancers_Heart_33738
ENSFDAG00000013011	Slc48a1	Enhancers_Heart_33738
ENSFDAG00000014262	Trappc9	Enhancers_Heart_33903,Enhancers_Heart_33906
ENSFDAG00000016817	Chrac1	Enhancers_Heart_33903,Enhancers_Heart_33906
ENSFDAG00000011112	Gm6569	Enhancers_Heart_34021
ENSFDAG00000021090	Adgrb1	Enhancers_Heart_34021
ENSFDAG00000021135	Mafa	Enhancers_Heart_34070
ENSFDAG00000017737	Zc3h3	Enhancers_Heart_34070
ENSFDAG00000010104	Chka	Enhancers_Heart_47404
ENSFDAG00000015169	Ncf4	Enhancers_Heart_34261
ENSFDAG00000007164	Gm49510	Enhancers_Heart_34345
ENSFDAG00000005497	Triobp	Enhancers_Heart_34354
ENSFDAG00000000919	Nol12	Enhancers_Heart_34354
ENSFDAG00000008334	Sun2	Enhancers_Heart_34432,Enhancers_Heart_34435,Enhancers_Heart_34437
ENSFDAG00000000554	Gtpbp1	Enhancers_Heart_34432,Enhancers_Heart_34435,Enhancers_Heart_34437
ENSFDAG00000007735	Mgat3	Enhancers_Heart_34480
ENSFDAG00000010668	Tab1	Enhancers_Heart_34480
ENSFDAG00000017953	Enthd1	Enhancers_Heart_34492,Enhancers_Heart_34493
ENSFDAG00000016878	Cacna1i	Enhancers_Heart_34492,Enhancers_Heart_34493
ENSFDAG00000006165	Fam83f	Enhancers_Heart_34499,Enhancers_Heart_34502
ENSFDAG00000002610	Grap2	Enhancers_Heart_34499
ENSFDAG00000021368	Tnrc6b	Enhancers_Heart_34502,Enhancers_Heart_34510
ENSFDAG00000007554	Adsl	Enhancers_Heart_34510
ENSFDAG00000010622	Sgsm3	Enhancers_Heart_34530
ENSFDAG00000006435	Mrtfa	Enhancers_Heart_34530
ENSFDAG00000008918	Chadl	Enhancers_Heart_34554
ENSFDAG00000001321	Rrp7a	Enhancers_Heart_34623
ENSFDAG00000018263	Zfp957	Enhancers_Heart_34623
ENSFDAG00000011748	Mpped1	Enhancers_Heart_34708
ENSFDAG00000018663	Efcab6	Enhancers_Heart_34708
ENSFDAG00000006405	Parvb	Enhancers_Heart_34719,Enhancers_Heart_34743
ENSFDAG00000008996	Samm50	Enhancers_Heart_34719
ENSFDAG00000002708	Parvg	Enhancers_Heart_34743
ENSFDAG00000006258	Wnt7b	Enhancers_Heart_34853
ENSFDAG00000010325	Ppara	Enhancers_Heart_34853,Enhancers_Heart_34882,Enhancers_Heart_34883
ENSFDAG00000019666	Cdpf1	Enhancers_Heart_34882,Enhancers_Heart_34883
ENSFDAG00000002382	Gtse1	Enhancers_Heart_34889
ENSFDAG00000017472	Trmu	Enhancers_Heart_34889
ENSFDAG00000002679	Celsr1	Enhancers_Heart_34902
ENSFDAG00000014478	Gramd4	Enhancers_Heart_34902,Enhancers_Heart_34929
ENSFDAG00000010883	Cerk	Enhancers_Heart_34929
ENSFDAG00000010354	Tbc1d22a	Enhancers_Heart_34951,Enhancers_Heart_34953,Enhancers_Heart_34962,Enhancers_Heart_34966,Enhancers_Heart_34978
ENSFDAG00000018919	Tafa5	Enhancers_Heart_34978,Enhancers_Heart_34988
ENSFDAG00000009300	Brd1	Enhancers_Heart_34988
ENSFDAG00000004890	Abcd2	Enhancers_Heart_35064,Enhancers_Heart_35067
ENSFDAG00000015276	Slc2a13	Enhancers_Heart_35064,Enhancers_Heart_35067
ENSFDAG00000013019	Zcrb1	Enhancers_Heart_35085
ENSFDAG00000015765	Yaf2	Enhancers_Heart_35085
ENSFDAG00000020339	Prickle1	Enhancers_Heart_35092,Enhancers_Heart_35093
ENSFDAG00000003399	Pphln1	Enhancers_Heart_35092,Enhancers_Heart_35093
ENSFDAG00000018503	Twf1	Enhancers_Heart_35134
ENSFDAG00000000334	Arid2	Enhancers_Heart_35169
ENSFDAG00000021455	Ano6	Enhancers_Heart_35169
ENSFDAG00000011618	Slc38a2	Enhancers_Heart_35201
ENSFDAG00000008153	N.A	Enhancers_Heart_35201
ENSFDAG00000019166	Endou	Enhancers_Heart_35291
ENSFDAG00000001680	Rapgef3	Enhancers_Heart_35291
ENSFDAG00000017952	Tex49	Enhancers_Heart_35354
ENSFDAG00000021042	Adcy6	Enhancers_Heart_35354
ENSFDAG00000006466	Ddn	Enhancers_Heart_35379
ENSFDAG00000019278	Rhebl1	Enhancers_Heart_35383
ENSFDAG00000013743	Dhh	Enhancers_Heart_35383
ENSFDAG00000006677	N.A	Enhancers_Heart_35389
ENSFDAG00000009985	N.A	Enhancers_Heart_35389
ENSFDAG00000016883	Prpf40b	Enhancers_Heart_35415
ENSFDAG00000012153	Fmnl3	Enhancers_Heart_35415
ENSFDAG00000017322	Tmbim6	Enhancers_Heart_35426
ENSFDAG00000016568	Nckap5l	Enhancers_Heart_35426
ENSFDAG00000000188	Letmd1	Enhancers_Heart_35511,Enhancers_Heart_35512,Enhancers_Heart_35515
ENSFDAG00000014650	Csrnp2	Enhancers_Heart_35511,Enhancers_Heart_35512,Enhancers_Heart_35515
ENSFDAG00000017982	Atg101	Enhancers_Heart_35605
ENSFDAG00000009754	Krt80	Enhancers_Heart_35605
ENSFDAG00000009187	N.A	Enhancers_Heart_35698
ENSFDAG00000013374	Gm28047	Enhancers_Heart_35698,Enhancers_Heart_35707
ENSFDAG00000009555	N.A	Enhancers_Heart_35707
ENSFDAG00000006197	Dnase1	Enhancers_Heart_35772
ENSFDAG00000013107	Trap1	Enhancers_Heart_35772
ENSFDAG00000021257	Adcy9	Enhancers_Heart_35803,Enhancers_Heart_35804
ENSFDAG00000016999	N.A	Enhancers_Heart_35803,Enhancers_Heart_35804
ENSFDAG00000007388	Rbfox1	Enhancers_Heart_35895,Enhancers_Heart_35898,Enhancers_Heart_35903,Enhancers_Heart_35904,Enhancers_Heart_35907,Enhancers_Heart_35909,Enhancers_Heart_35910,Enhancers_Heart_35919,Enhancers_Heart_35921,Enhancers_Heart_35922,Enhancers_Heart_35923,Enhancers_Heart_35924
ENSFDAG00000021391	Tmem114	Enhancers_Heart_35919,Enhancers_Heart_35921,Enhancers_Heart_35922,Enhancers_Heart_35923,Enhancers_Heart_35924
ENSFDAG00000010818	Clec16a	Enhancers_Heart_35993,Enhancers_Heart_36001,Enhancers_Heart_36005
ENSFDAG00000012803	Socs1	Enhancers_Heart_35993,Enhancers_Heart_36001,Enhancers_Heart_36005
ENSFDAG00000008312	Tnfrsf17	Enhancers_Heart_36091
ENSFDAG00000005870	Snx29	Enhancers_Heart_36091,Enhancers_Heart_36103,Enhancers_Heart_36109
ENSFDAG00000011127	Cpped1	Enhancers_Heart_36103,Enhancers_Heart_36109
ENSFDAG00000003610	Shisa9	Enhancers_Heart_36123
ENSFDAG00000013105	Ercc4	Enhancers_Heart_36123,Enhancers_Heart_36133
ENSFDAG00000009819	Mrtfb	Enhancers_Heart_36133,Enhancers_Heart_36185
ENSFDAG00000009234	Parn	Enhancers_Heart_36185
ENSFDAG00000009630	Nde1	Enhancers_Heart_36199
ENSFDAG00000021336	Myh11	Enhancers_Heart_36199
ENSFDAG00000019547	Abcc1	Enhancers_Heart_36225,Enhancers_Heart_36228,Enhancers_Heart_36230
ENSFDAG00000013875	Abcc6	Enhancers_Heart_36225,Enhancers_Heart_36228,Enhancers_Heart_36230
ENSFDAG00000011875	Ppm1f	Enhancers_Heart_36334
ENSFDAG00000008676	Mapk1	Enhancers_Heart_36334
ENSFDAG00000004473	N.A	Enhancers_Heart_72720
ENSFDAG00000015125	Ccdc188	Enhancers_Heart_36389
ENSFDAG00000007295	Zdhhc8	Enhancers_Heart_36389
ENSFDAG00000015195	Dvl3	Enhancers_Heart_36473
ENSFDAG00000009808	Ap2m1	Enhancers_Heart_36473
ENSFDAG00000010248	Ephb3	Enhancers_Heart_36505
ENSFDAG00000017323	N.A	Enhancers_Heart_36505
ENSFDAG00000007825	Liph	Enhancers_Heart_36539
ENSFDAG00000015039	Igf2bp2	Enhancers_Heart_36539
ENSFDAG00000012983	Fetub	Enhancers_Heart_36563
ENSFDAG00000005577	Hrg	Enhancers_Heart_36563
ENSFDAG00000008432	Xxylt1	Enhancers_Heart_36913,Enhancers_Heart_36953
ENSFDAG00000017373	Lsg1	Enhancers_Heart_36913
ENSFDAG00000002089	Acap2	Enhancers_Heart_36953
ENSFDAG00000018685	Bdh1	Enhancers_Heart_36997,Enhancers_Heart_37004,Enhancers_Heart_37005
ENSFDAG00000007182	Dlg1	Enhancers_Heart_37004,Enhancers_Heart_37005
ENSFDAG00000006606	Muc20	Enhancers_Heart_37111
ENSFDAG00000003511	Rubcn	Enhancers_Heart_37111
ENSFDAG00000014643	Hcls1	Enhancers_Heart_37441
ENSFDAG00000021195	Fbxo40	Enhancers_Heart_37441
ENSFDAG00000007432	Tmem39a	Enhancers_Heart_37551
ENSFDAG00000010940	Arhgap31	Enhancers_Heart_37551
ENSFDAG00000012999	Upk1b	Enhancers_Heart_37603,Enhancers_Heart_37604
ENSFDAG00000018887	Igsf11	Enhancers_Heart_37603,Enhancers_Heart_37604,Enhancers_Heart_37615,Enhancers_Heart_37616,Enhancers_Heart_37617
ENSFDAG00000017483	Treh	Enhancers_Heart_37826
ENSFDAG00000006543	Phldb1	Enhancers_Heart_37826
ENSFDAG00000020807	Alcam	Enhancers_Heart_37940
ENSFDAG00000014969	Riox2	Enhancers_Heart_38160
ENSFDAG00000015228	Crybg3	Enhancers_Heart_38160
ENSFDAG00000018194	Pou1f1	Enhancers_Heart_38190
ENSFDAG00000003355	Htr1f	Enhancers_Heart_38190
ENSFDAG00000014833	Gbe1	Enhancers_Heart_38211,Enhancers_Heart_38212,Enhancers_Heart_38216
ENSFDAG00000007990	Robo1	Enhancers_Heart_38221
ENSFDAG00000000054	Nrip1	Enhancers_Heart_38240,Enhancers_Heart_38269
ENSFDAG00000012769	Ldhb	Enhancers_Heart_38240
ENSFDAG00000013121	Usp25	Enhancers_Heart_38269,Enhancers_Heart_38292,Enhancers_Heart_38301
ENSFDAG00000018831	N.A	Enhancers_Heart_38292,Enhancers_Heart_38301
ENSFDAG00000019616	Gabpa	Enhancers_Heart_38371,Enhancers_Heart_38380,Enhancers_Heart_38388,Enhancers_Heart_38404
ENSFDAG00000018450	App	Enhancers_Heart_38371,Enhancers_Heart_38380,Enhancers_Heart_38388,Enhancers_Heart_38404,Enhancers_Heart_38421
ENSFDAG00000017820	Cyyr1	Enhancers_Heart_38421,Enhancers_Heart_38437,Enhancers_Heart_38438,Enhancers_Heart_38442
ENSFDAG00000006349	Adamts1	Enhancers_Heart_38437,Enhancers_Heart_38438,Enhancers_Heart_38442
ENSFDAG00000012916	N6amt1	Enhancers_Heart_38509,Enhancers_Heart_38510,Enhancers_Heart_38517,Enhancers_Heart_38522,Enhancers_Heart_38523,Enhancers_Heart_38526,Enhancers_Heart_38540
ENSFDAG00000000365	N.A	Enhancers_Heart_38571
ENSFDAG00000006385	Bach1	Enhancers_Heart_38571,Enhancers_Heart_38587
ENSFDAG00000006265	Grik1	Enhancers_Heart_38587
ENSFDAG00000017672	Eva1c	Enhancers_Heart_38651,Enhancers_Heart_38657,Enhancers_Heart_38660,Enhancers_Heart_38662
ENSFDAG00000011088	Cfap298	Enhancers_Heart_38651,Enhancers_Heart_38657,Enhancers_Heart_38660,Enhancers_Heart_38662
ENSFDAG00000017284	Cryzl1	Enhancers_Heart_38766,Enhancers_Heart_38767
ENSFDAG00000017095	Atp5o	Enhancers_Heart_38766,Enhancers_Heart_38767
ENSFDAG00000012907	Hlcs	Enhancers_Heart_38865
ENSFDAG00000017254	Sim2	Enhancers_Heart_38865
ENSFDAG00000008873	Ets2	Enhancers_Heart_38992,Enhancers_Heart_38993
ENSFDAG00000019778	Psmg1	Enhancers_Heart_38992,Enhancers_Heart_38993
ENSFDAG00000013571	Igsf5	Enhancers_Heart_39048
ENSFDAG00000017712	Tiam2	Enhancers_Heart_39085,Enhancers_Heart_39087
ENSFDAG00000017451	Cldn20	Enhancers_Heart_39085,Enhancers_Heart_39087
ENSFDAG00000015516	Nox3	Enhancers_Heart_39109,Enhancers_Heart_39112,Enhancers_Heart_39114
ENSFDAG00000015740	Arid1b	Enhancers_Heart_39109,Enhancers_Heart_39112,Enhancers_Heart_39114
ENSFDAG00000005611	Zdhhc14	Enhancers_Heart_39198
ENSFDAG00000019452	Snx9	Enhancers_Heart_39198
ENSFDAG00000016352	Synj2	Enhancers_Heart_39239
ENSFDAG00000008056	Serac1	Enhancers_Heart_39239
ENSFDAG00000016105	Rps6ka2	Enhancers_Heart_39310
ENSFDAG00000011738	Mpc1	Enhancers_Heart_39310
ENSFDAG00000007490	Pde10a	Enhancers_Heart_39362
ENSFDAG00000010065	T	Enhancers_Heart_39362
ENSFDAG00000006081	Qki	Enhancers_Heart_39411,Enhancers_Heart_39439,Enhancers_Heart_39470
ENSFDAG00000011666	Pacrg	Enhancers_Heart_39411,Enhancers_Heart_39439,Enhancers_Heart_39470
ENSFDAG00000017199	Agpat4	Enhancers_Heart_39509
ENSFDAG00000007378	Map3k4	Enhancers_Heart_39509
ENSFDAG00000016527	Tcp10c	Enhancers_Heart_39577
ENSFDAG00000019435	Unc93a2	Enhancers_Heart_39577
ENSFDAG00000017270	Afdn	Enhancers_Heart_39575,Enhancers_Heart_39588,Enhancers_Heart_39611
ENSFDAG00000019773	N.A	Enhancers_Heart_39575,Enhancers_Heart_39588,Enhancers_Heart_39611,Enhancers_Heart_39770
ENSFDAG00000013313	Dact2	Enhancers_Heart_39641
ENSFDAG00000003190	Hmbox1	Enhancers_Heart_39641
ENSFDAG00000015501	Thbs2	Enhancers_Heart_39662
ENSFDAG00000013396	Wdr27	Enhancers_Heart_39662
ENSFDAG00000007930	Gm3435	Enhancers_Heart_39682,Enhancers_Heart_39696,Enhancers_Heart_39698
ENSFDAG00000014165	Dll1	Enhancers_Heart_39682,Enhancers_Heart_39696,Enhancers_Heart_39698
ENSFDAG00000017328	Fam120b	Enhancers_Heart_39705
ENSFDAG00000003859	Psmb1	Enhancers_Heart_39705
ENSFDAG00000006148	Rgmb	Enhancers_Heart_39720,Enhancers_Heart_39722
ENSFDAG00000011292	Flywch1	Enhancers_Heart_39791
ENSFDAG00000016191	Flywch2	Enhancers_Heart_39791
ENSFDAG00000017083	Traf7	Enhancers_Heart_39818
ENSFDAG00000001704	Caskin1	Enhancers_Heart_39818
ENSFDAG00000018823	Ift140	Enhancers_Heart_39860
ENSFDAG00000009697	Tmem204	Enhancers_Heart_39860
ENSFDAG00000015217	Msln	Enhancers_Heart_39921
ENSFDAG00000017892	Atp6v0e	Enhancers_Heart_40027
ENSFDAG00000018666	Itpr3	Enhancers_Heart_40066,Enhancers_Heart_40069
ENSFDAG00000008564	Uqcc2	Enhancers_Heart_40066,Enhancers_Heart_40069
ENSFDAG00000012168	Cdkn1a	Enhancers_Heart_40253
ENSFDAG00000002070	Rab44	Enhancers_Heart_40253,Enhancers_Heart_40257
ENSFDAG00000006908	Cpne5	Enhancers_Heart_40257
ENSFDAG00000013513	Cmtr1	Enhancers_Heart_40316,Enhancers_Heart_40320
ENSFDAG00000008648	Ccdc167	Enhancers_Heart_40316,Enhancers_Heart_40320,Enhancers_Heart_40328
ENSFDAG00000017817	Zfand3	Enhancers_Heart_40379,Enhancers_Heart_40391
ENSFDAG00000017992	Btbd9	Enhancers_Heart_40379,Enhancers_Heart_40391
ENSFDAG00000005316	Pde9a	Enhancers_Heart_40434
ENSFDAG00000007546	Wdr4	Enhancers_Heart_40434
ENSFDAG00000005450	Sik1	Enhancers_Heart_40510
ENSFDAG00000010899	Rrp1b	Enhancers_Heart_40510
ENSFDAG00000014779	Adamts10	Enhancers_Heart_40552
ENSFDAG00000008997	Cers4	Enhancers_Heart_40587
ENSFDAG00000021011	Cd320	Enhancers_Heart_40587
ENSFDAG00000019465	Tnc	Enhancers_Heart_64670
ENSFDAG00000007702	C4b	Enhancers_Heart_40652
ENSFDAG00000016868	Msh5	Enhancers_Heart_40662
ENSFDAG00000002673	Vwa7	Enhancers_Heart_40662
ENSFDAG00000007699	Plpbp	Enhancers_Heart_86493
ENSFDAG00000008953	Ptchd4	Enhancers_Heart_40744
ENSFDAG00000018580	Opn5	Enhancers_Heart_40744
ENSFDAG00000004545	Adgrf1	Enhancers_Heart_40767,Enhancers_Heart_40772
ENSFDAG00000010409	Tnfrsf21	Enhancers_Heart_40767,Enhancers_Heart_40772
ENSFDAG00000018551	Rcan2	Enhancers_Heart_40852,Enhancers_Heart_40871,Enhancers_Heart_40878,Enhancers_Heart_40888,Enhancers_Heart_40891,Enhancers_Heart_40893,Enhancers_Heart_40910,Enhancers_Heart_40911
ENSFDAG00000006575	Enpp5	Enhancers_Heart_40852,Enhancers_Heart_40871,Enhancers_Heart_40878,Enhancers_Heart_40888,Enhancers_Heart_40891,Enhancers_Heart_40893,Enhancers_Heart_40910,Enhancers_Heart_40911
ENSFDAG00000011173	Clic5	Enhancers_Heart_40928
ENSFDAG00000015340	Supt3	Enhancers_Heart_40928
ENSFDAG00000018610	Gm32717	Enhancers_Heart_40976,Enhancers_Heart_40978,Enhancers_Heart_40979,Enhancers_Heart_40980,Enhancers_Heart_40981,Enhancers_Heart_40983,Enhancers_Heart_40984
ENSFDAG00000007350	Runx2	Enhancers_Heart_40976,Enhancers_Heart_40978,Enhancers_Heart_40979,Enhancers_Heart_40980,Enhancers_Heart_40981,Enhancers_Heart_40983,Enhancers_Heart_40984
ENSFDAG00000007493	Slc29a1	Enhancers_Heart_40998
ENSFDAG00000017878	Hsp90ab1	Enhancers_Heart_40998
ENSFDAG00000002748	Vegfa	Enhancers_Heart_41012,Enhancers_Heart_41047
ENSFDAG00000011684	Mrpl14	Enhancers_Heart_41012,Enhancers_Heart_41047
ENSFDAG00000008428	Polr1c	Enhancers_Heart_41096
ENSFDAG00000010221	Lrrc73	Enhancers_Heart_41096
ENSFDAG00000006588	N.A	Enhancers_Heart_41163,Enhancers_Heart_41164,Enhancers_Heart_41165,Enhancers_Heart_41168
ENSFDAG00000011540	Ubr2	Enhancers_Heart_41163,Enhancers_Heart_41164,Enhancers_Heart_41165
ENSFDAG00000005823	Mrps10	Enhancers_Heart_41168
ENSFDAG00000006015	Apobec2	Enhancers_Heart_41230
ENSFDAG00000018563	Unc5cl	Enhancers_Heart_41230
ENSFDAG00000009929	Daam2	Enhancers_Heart_41270
ENSFDAG00000014843	Kif6	Enhancers_Heart_41270,Enhancers_Heart_41281
ENSFDAG00000010965	Rpsa	Enhancers_Heart_41281,Enhancers_Heart_41286,Enhancers_Heart_41295,Enhancers_Heart_41296,Enhancers_Heart_41299
ENSFDAG00000017861	Dazl	Enhancers_Heart_41393
ENSFDAG00000018222	Plcl2	Enhancers_Heart_41393,Enhancers_Heart_41400
ENSFDAG00000006956	Tbc1d5	Enhancers_Heart_41400
ENSFDAG00000017750	Kat2b	Enhancers_Heart_41458,Enhancers_Heart_41460
ENSFDAG00000003706	Sgo1	Enhancers_Heart_41458,Enhancers_Heart_41460
ENSFDAG00000018509	Nudt12	Enhancers_Heart_41557
ENSFDAG00000012942	Efna5	Enhancers_Heart_41566,Enhancers_Heart_41568,Enhancers_Heart_41602,Enhancers_Heart_41603,Enhancers_Heart_41607,Enhancers_Heart_41617
ENSFDAG00000001963	Vapa	Enhancers_Heart_46203
ENSFDAG00000016323	Rab31	Enhancers_Heart_46203
ENSFDAG00000005836	Ndufv2	Enhancers_Heart_41742
ENSFDAG00000015757	Mtcl1	Enhancers_Heart_41742
ENSFDAG00000011352	Ptprm	Enhancers_Heart_41823
ENSFDAG00000017835	Lama1	Enhancers_Heart_41823
ENSFDAG00000016149	Arhgap28	Enhancers_Heart_41863,Enhancers_Heart_41902
ENSFDAG00000020446	Epb41l3	Enhancers_Heart_41902
ENSFDAG00000004013	Alk	Enhancers_Heart_42030,Enhancers_Heart_42031
ENSFDAG00000013609	Clip4	Enhancers_Heart_42030,Enhancers_Heart_42031
ENSFDAG00000007377	Lbh	Enhancers_Heart_42048
ENSFDAG00000002130	Ypel5	Enhancers_Heart_42048
ENSFDAG00000011846	Lclat1	Enhancers_Heart_42128
ENSFDAG00000020690	Fhip2a	Enhancers_Heart_50096
ENSFDAG00000017157	Ablim1	Enhancers_Heart_50077,Enhancers_Heart_50096
ENSFDAG00000018559	Capn13	Enhancers_Heart_42128
ENSFDAG00000017192	Galnt14	Enhancers_Heart_42142
ENSFDAG00000018098	Srd5a2	Enhancers_Heart_42190
ENSFDAG00000018083	Rasgrp3	Enhancers_Heart_42244,Enhancers_Heart_42249,Enhancers_Heart_42263,Enhancers_Heart_42264,Enhancers_Heart_42265,Enhancers_Heart_42270,Enhancers_Heart_42275,Enhancers_Heart_42276,Enhancers_Heart_42290,Enhancers_Heart_42293,Enhancers_Heart_42295,Enhancers_Heart_42316
ENSFDAG00000001557	Fam98a	Enhancers_Heart_42316
ENSFDAG00000007193	Crim1	Enhancers_Heart_42373
ENSFDAG00000007141	Fez2	Enhancers_Heart_42373
ENSFDAG00000016897	Vit	Enhancers_Heart_42405
ENSFDAG00000003988	Strn	Enhancers_Heart_42405,Enhancers_Heart_42411
ENSFDAG00000001096	Gpatch11	Enhancers_Heart_42411
ENSFDAG00000005037	Cdc42ep3	Enhancers_Heart_42450,Enhancers_Heart_42454
ENSFDAG00000013407	Cnn3	Enhancers_Heart_42450,Enhancers_Heart_42454,Enhancers_Heart_42460,Enhancers_Heart_42463
ENSFDAG00000009090	Rmdn2	Enhancers_Heart_42460,Enhancers_Heart_42463
ENSFDAG00000016462	Tmem178	Enhancers_Heart_42592,Enhancers_Heart_42601,Enhancers_Heart_42606,Enhancers_Heart_42608,Enhancers_Heart_42611,Enhancers_Heart_42612,Enhancers_Heart_42613
ENSFDAG00000010373	Map4k3	Enhancers_Heart_42592
ENSFDAG00000010783	Slc8a1	Enhancers_Heart_42601,Enhancers_Heart_42606,Enhancers_Heart_42608,Enhancers_Heart_42611,Enhancers_Heart_42612,Enhancers_Heart_42613
ENSFDAG00000012158	1700009N14Rik	Enhancers_Heart_42686,Enhancers_Heart_42687,Enhancers_Heart_42688,Enhancers_Heart_42707,Enhancers_Heart_42708,Enhancers_Heart_42716
ENSFDAG00000014346	Pkdcc	Enhancers_Heart_42686,Enhancers_Heart_42687,Enhancers_Heart_42688,Enhancers_Heart_42707,Enhancers_Heart_42708,Enhancers_Heart_42716,Enhancers_Heart_42739
ENSFDAG00000000045	Eml4	Enhancers_Heart_42739
ENSFDAG00000015467	Haao	Enhancers_Heart_42780,Enhancers_Heart_42851,Enhancers_Heart_42880,Enhancers_Heart_42882,Enhancers_Heart_42884,Enhancers_Heart_42903
ENSFDAG00000013524	Prkce	Enhancers_Heart_43047,Enhancers_Heart_43058,Enhancers_Heart_43069,Enhancers_Heart_43103,Enhancers_Heart_43104,Enhancers_Heart_43122,Enhancers_Heart_43124,Enhancers_Heart_43138
ENSFDAG00000019389	Epas1	Enhancers_Heart_43047,Enhancers_Heart_43058,Enhancers_Heart_43069,Enhancers_Heart_43103,Enhancers_Heart_43104,Enhancers_Heart_43122,Enhancers_Heart_43124,Enhancers_Heart_43138,Enhancers_Heart_43179,Enhancers_Heart_43180,Enhancers_Heart_43181
ENSFDAG00000016832	Tmem247	Enhancers_Heart_43179,Enhancers_Heart_43180,Enhancers_Heart_43181,Enhancers_Heart_43190
ENSFDAG00000019156	Atp6v1e2	Enhancers_Heart_43190
ENSFDAG00000016496	Socs5	Enhancers_Heart_43217,Enhancers_Heart_43237,Enhancers_Heart_43238,Enhancers_Heart_43239
ENSFDAG00000010599	Mcfd2	Enhancers_Heart_43217,Enhancers_Heart_43237,Enhancers_Heart_43238,Enhancers_Heart_43239
ENSFDAG00000015825	Ttc7	Enhancers_Heart_43260
ENSFDAG00000020928	Stpg4	Enhancers_Heart_43260
ENSFDAG00000017622	Calm2	Enhancers_Heart_43287
ENSFDAG00000011539	N.A	Enhancers_Heart_43287
ENSFDAG00000021185	Fbxo11	Enhancers_Heart_43317
ENSFDAG00000010538	Foxn2	Enhancers_Heart_43317,Enhancers_Heart_43325
ENSFDAG00000010412	Ppp1r21	Enhancers_Heart_43325
ENSFDAG00000004280	Crem	Enhancers_Heart_43727
ENSFDAG00000019150	Wac	Enhancers_Heart_43727
ENSFDAG00000018837	Sephs1	Enhancers_Heart_50401
ENSFDAG00000012723	Bambi	Enhancers_Heart_43384,Enhancers_Heart_43393
ENSFDAG00000013390	Lyzl1	Enhancers_Heart_43384,Enhancers_Heart_43393
ENSFDAG00000015115	Jcad	Enhancers_Heart_43462,Enhancers_Heart_43471,Enhancers_Heart_43472,Enhancers_Heart_43475,Enhancers_Heart_43487
ENSFDAG00000010014	Mkx	Enhancers_Heart_43707
ENSFDAG00000007264	Odad2	Enhancers_Heart_43715
ENSFDAG00000021331	Mpp7	Enhancers_Heart_43715
ENSFDAG00000013706	Ccdc7b	Enhancers_Heart_43744,Enhancers_Heart_43759,Enhancers_Heart_43760
ENSFDAG00000019433	Fzd8	Enhancers_Heart_43744,Enhancers_Heart_43759,Enhancers_Heart_43760
ENSFDAG00000013416	Colec12	Enhancers_Heart_43803
ENSFDAG00000006842	Thoc1	Enhancers_Heart_43803
ENSFDAG00000012484	Rock1	Enhancers_Heart_43827,Enhancers_Heart_43829
ENSFDAG00000011775	Greb1l	Enhancers_Heart_43827,Enhancers_Heart_43829,Enhancers_Heart_43831,Enhancers_Heart_43837
ENSFDAG00000009702	Esco1	Enhancers_Heart_43831,Enhancers_Heart_43837
ENSFDAG00000011458	Mib1	Enhancers_Heart_43878,Enhancers_Heart_43879,Enhancers_Heart_43882,Enhancers_Heart_43885,Enhancers_Heart_43890,Enhancers_Heart_43916
ENSFDAG00000017620	Rbbp8	Enhancers_Heart_43878,Enhancers_Heart_43879,Enhancers_Heart_43882,Enhancers_Heart_43885,Enhancers_Heart_43890,Enhancers_Heart_43916
ENSFDAG00000017361	Cables1	Enhancers_Heart_43957
ENSFDAG00000015415	Tmem241	Enhancers_Heart_43957
ENSFDAG00000016560	Zfp521	Enhancers_Heart_44066,Enhancers_Heart_44078
ENSFDAG00000018352	Hrh4	Enhancers_Heart_44066
ENSFDAG00000016570	Ss18	Enhancers_Heart_44078
ENSFDAG00000013233	Kctd1	Enhancers_Heart_44098,Enhancers_Heart_44099,Enhancers_Heart_44103,Enhancers_Heart_44108
ENSFDAG00000004135	Taf4b	Enhancers_Heart_44098
ENSFDAG00000014899	Aqp4	Enhancers_Heart_44099,Enhancers_Heart_44103,Enhancers_Heart_44108,Enhancers_Heart_44111
ENSFDAG00000002822	Chst9	Enhancers_Heart_44111
ENSFDAG00000006090	Cdh2	Enhancers_Heart_44145,Enhancers_Heart_44150,Enhancers_Heart_44153,Enhancers_Heart_44157
ENSFDAG00000013871	Psme3ip1	Enhancers_Heart_44145,Enhancers_Heart_44150,Enhancers_Heart_44153,Enhancers_Heart_44157
ENSFDAG00000012980	Garem1	Enhancers_Heart_44229,Enhancers_Heart_44244
ENSFDAG00000011467	Mep1b	Enhancers_Heart_44229
ENSFDAG00000013596	Klhl14	Enhancers_Heart_44244
ENSFDAG00000013713	Asxl3	Enhancers_Heart_44255
ENSFDAG00000009214	N.A	Enhancers_Heart_44255
ENSFDAG00000021141	Dtna	Enhancers_Heart_44269,Enhancers_Heart_44272,Enhancers_Heart_44278,Enhancers_Heart_44283
ENSFDAG00000004907	Mapre2	Enhancers_Heart_44272,Enhancers_Heart_44278,Enhancers_Heart_44283,Enhancers_Heart_44328
ENSFDAG00000001890	Zfp397	Enhancers_Heart_44328
ENSFDAG00000009854	Mocos	Enhancers_Heart_44364,Enhancers_Heart_44369,Enhancers_Heart_44377,Enhancers_Heart_44387,Enhancers_Heart_44388,Enhancers_Heart_44409
ENSFDAG00000004393	Fhod3	Enhancers_Heart_44364,Enhancers_Heart_44369,Enhancers_Heart_44377,Enhancers_Heart_44387,Enhancers_Heart_44388,Enhancers_Heart_44409,Enhancers_Heart_44443,Enhancers_Heart_44444
ENSFDAG00000014627	Tpgs2	Enhancers_Heart_44443,Enhancers_Heart_44444
ENSFDAG00000013076	Pik3c3	Enhancers_Heart_44482
ENSFDAG00000016882	Gpr17	Enhancers_Heart_44507
ENSFDAG00000012086	Stard4	Enhancers_Heart_44560
ENSFDAG00000002731	Ccng1	Enhancers_Heart_44560
ENSFDAG00000014464	Nrep	Enhancers_Heart_44623
ENSFDAG00000007754	Epb41l4a	Enhancers_Heart_44623
ENSFDAG00000021535	Hspa9	Enhancers_Heart_44682
ENSFDAG00000012001	Ctnna1	Enhancers_Heart_44682
ENSFDAG00000011347	Lrrtm2	Enhancers_Heart_44693
ENSFDAG00000014162	Sil1	Enhancers_Heart_44693
ENSFDAG00000006187	Paip2	Enhancers_Heart_44724
ENSFDAG00000020588	Slc23a1	Enhancers_Heart_44724,Enhancers_Heart_44725
ENSFDAG00000008693	Fchsd1	Enhancers_Heart_44840
ENSFDAG00000018945	Arap3	Enhancers_Heart_44840,Enhancers_Heart_44847
ENSFDAG00000003084	Pcdh1	Enhancers_Heart_44847,Enhancers_Heart_44878
ENSFDAG00000011903	Dele1	Enhancers_Heart_44878
ENSFDAG00000015929	Spry4	Enhancers_Heart_44948,Enhancers_Heart_44985
ENSFDAG00000010332	Fgf1	Enhancers_Heart_44948,Enhancers_Heart_44985
ENSFDAG00000015508	Arhgap26	Enhancers_Heart_45064,Enhancers_Heart_45073,Enhancers_Heart_45074
ENSFDAG00000013951	Arhgap26	Enhancers_Heart_45131,Enhancers_Heart_45138,Enhancers_Heart_45147,Enhancers_Heart_45159
ENSFDAG00000019570	Nr3c1	Enhancers_Heart_45131,Enhancers_Heart_45138,Enhancers_Heart_45147,Enhancers_Heart_45159,Enhancers_Heart_45181
ENSFDAG00000013503	Yipf5	Enhancers_Heart_45181
ENSFDAG00000018514	Kctd16	Enhancers_Heart_45213
ENSFDAG00000018575	Gpr151	Enhancers_Heart_45266
ENSFDAG00000001270	Ppp2r2b	Enhancers_Heart_45266,Enhancers_Heart_45268
ENSFDAG00000014660	Sema6a	Enhancers_Heart_45482,Enhancers_Heart_45484,Enhancers_Heart_45490
ENSFDAG00000012676	Dtwd2	Enhancers_Heart_45498
ENSFDAG00000007522	Zfp608	Enhancers_Heart_45635,Enhancers_Heart_45646,Enhancers_Heart_45651,Enhancers_Heart_45653,Enhancers_Heart_45691,Enhancers_Heart_45692,Enhancers_Heart_45693
ENSFDAG00000008011	Cry1	Enhancers_Heart_45635,Enhancers_Heart_45646,Enhancers_Heart_45651,Enhancers_Heart_45653
ENSFDAG00000018310	Lmnb1	Enhancers_Heart_45739,Enhancers_Heart_45741,Enhancers_Heart_45745,Enhancers_Heart_45748
ENSFDAG00000010811	Marchf3	Enhancers_Heart_45739,Enhancers_Heart_45741,Enhancers_Heart_45745,Enhancers_Heart_45748,Enhancers_Heart_45753,Enhancers_Heart_45755,Enhancers_Heart_45756,Enhancers_Heart_45757,Enhancers_Heart_45761,Enhancers_Heart_45765,Enhancers_Heart_45766,Enhancers_Heart_45774
ENSFDAG00000018053	C330018D20Rik	Enhancers_Heart_45753,Enhancers_Heart_45755,Enhancers_Heart_45756,Enhancers_Heart_45757,Enhancers_Heart_45761,Enhancers_Heart_45765,Enhancers_Heart_45766,Enhancers_Heart_45774
ENSFDAG00000015741	Isoc1	Enhancers_Heart_45828,Enhancers_Heart_45829
ENSFDAG00000013483	Slc27a6	Enhancers_Heart_45828,Enhancers_Heart_45829
ENSFDAG00000007015	Chsy3	Enhancers_Heart_45840
ENSFDAG00000014187	Minar2	Enhancers_Heart_45840
ENSFDAG00000013125	Synpo	Enhancers_Heart_45873,Enhancers_Heart_45901
ENSFDAG00000012794	Ndst1	Enhancers_Heart_45873,Enhancers_Heart_45901
ENSFDAG00000010458	Camk2a	Enhancers_Heart_45946
ENSFDAG00000012006	Slc6a7	Enhancers_Heart_45946
ENSFDAG00000008719	Ppargc1b	Enhancers_Heart_45986,Enhancers_Heart_45991,Enhancers_Heart_45994,Enhancers_Heart_46013
ENSFDAG00000011817	Pde6a	Enhancers_Heart_45986,Enhancers_Heart_45991,Enhancers_Heart_45994,Enhancers_Heart_46013
ENSFDAG00000012450	Il17b	Enhancers_Heart_46088
ENSFDAG00000014242	Pcyox1l	Enhancers_Heart_46088
ENSFDAG00000000157	Grpel2	Enhancers_Heart_46092
ENSFDAG00000000343	Afap1l1	Enhancers_Heart_46118,Enhancers_Heart_46144
ENSFDAG00000016434	Ablim3	Enhancers_Heart_46118,Enhancers_Heart_46144,Enhancers_Heart_46153
ENSFDAG00000019580	Sh3tc2	Enhancers_Heart_46153
ENSFDAG00000008494	Apcdd1	Enhancers_Heart_46213
ENSFDAG00000010782	Napg	Enhancers_Heart_46213
ENSFDAG00000017309	Piezo2	Enhancers_Heart_46231
ENSFDAG00000003868	Gnal	Enhancers_Heart_46231
ENSFDAG00000006409	Wdr7	Enhancers_Heart_46238
ENSFDAG00000000579	Nedd4l	Enhancers_Heart_46317,Enhancers_Heart_46318,Enhancers_Heart_46323
ENSFDAG00000000368	Alpk2	Enhancers_Heart_46317,Enhancers_Heart_46318,Enhancers_Heart_46323
ENSFDAG00000012757	Oacyl	Enhancers_Heart_46412
ENSFDAG00000008290	Sec11c	Enhancers_Heart_46412
ENSFDAG00000000676	Lman1	Enhancers_Heart_46416,Enhancers_Heart_46417,Enhancers_Heart_46421,Enhancers_Heart_46427,Enhancers_Heart_46428,Enhancers_Heart_46432,Enhancers_Heart_46436,Enhancers_Heart_46457,Enhancers_Heart_46458
ENSFDAG00000015012	Ccbe1	Enhancers_Heart_46416,Enhancers_Heart_46417,Enhancers_Heart_46421,Enhancers_Heart_46427,Enhancers_Heart_46428,Enhancers_Heart_46432,Enhancers_Heart_46436,Enhancers_Heart_46457,Enhancers_Heart_46458,Enhancers_Heart_46460
ENSFDAG00000012197	Nmd3	Enhancers_Heart_46460
ENSFDAG00000012969	Fam210a	Enhancers_Heart_46542
ENSFDAG00000003475	Dcc	Enhancers_Heart_46732
ENSFDAG00000021094	Mex3c	Enhancers_Heart_46746
ENSFDAG00000008134	Smad4	Enhancers_Heart_46746
ENSFDAG00000019028	Mapk4	Enhancers_Heart_46755,Enhancers_Heart_46756,Enhancers_Heart_46757,Enhancers_Heart_46759,Enhancers_Heart_46760,Enhancers_Heart_46768,Enhancers_Heart_46774,Enhancers_Heart_46777
ENSFDAG00000001058	Mro	Enhancers_Heart_46755
ENSFDAG00000002009	Ska1	Enhancers_Heart_46760,Enhancers_Heart_46768,Enhancers_Heart_46774,Enhancers_Heart_46777
ENSFDAG00000017680	Smad7	Enhancers_Heart_46830,Enhancers_Heart_46883,Enhancers_Heart_46884,Enhancers_Heart_46885,Enhancers_Heart_46912
ENSFDAG00000013347	Dym	Enhancers_Heart_46830
ENSFDAG00000017379	Ctif	Enhancers_Heart_46883,Enhancers_Heart_46884,Enhancers_Heart_46885,Enhancers_Heart_46912,Enhancers_Heart_46929,Enhancers_Heart_46936
ENSFDAG00000018792	Zbtb7c	Enhancers_Heart_46929,Enhancers_Heart_46936,Enhancers_Heart_46985
ENSFDAG00000002894	Smad2	Enhancers_Heart_46985
ENSFDAG00000016796	Rnf165	Enhancers_Heart_47007,Enhancers_Heart_47011
ENSFDAG00000020362	8030462N17Rik	Enhancers_Heart_47007,Enhancers_Heart_47011
ENSFDAG00000012230	Slc14a2	Enhancers_Heart_47072,Enhancers_Heart_47076
ENSFDAG00000005607	Setbp1	Enhancers_Heart_47072,Enhancers_Heart_47076
ENSFDAG00000007875	Mbp	Enhancers_Heart_47230
ENSFDAG00000006701	Mrgprd	Enhancers_Heart_85713
ENSFDAG00000017359	Gal	Enhancers_Heart_47356
ENSFDAG00000002642	Ppp6r3	Enhancers_Heart_47356
ENSFDAG00000012995	Tcirg1	Enhancers_Heart_47404
ENSFDAG00000017966	Pitpnm1	Enhancers_Heart_47422
ENSFDAG00000005619	Aip	Enhancers_Heart_47422
ENSFDAG00000009433	Cabp4	Enhancers_Heart_47423
ENSFDAG00000012631	Gpr152	Enhancers_Heart_47423
ENSFDAG00000007607	Rad9a	Enhancers_Heart_47437
ENSFDAG00000008187	Clcf1	Enhancers_Heart_47437
ENSFDAG00000020701	Pold4	Enhancers_Heart_47439
ENSFDAG00000015827	N.A	Enhancers_Heart_47457
ENSFDAG00000012657	2010003K11Rik	Enhancers_Heart_47457
ENSFDAG00000013504	Sptbn2	Enhancers_Heart_47474
ENSFDAG00000015530	Rbm4b	Enhancers_Heart_47474
ENSFDAG00000009101	Zdhhc24	Enhancers_Heart_47477
ENSFDAG00000011028	Bbs1	Enhancers_Heart_47477
ENSFDAG00000006567	Lrrfip2	Enhancers_Heart_47496
ENSFDAG00000006921	Pacs1	Enhancers_Heart_47496
ENSFDAG00000002804	Majin	Enhancers_Heart_47593
ENSFDAG00000018602	Ppp2r5b	Enhancers_Heart_47593
ENSFDAG00000007697	Ehd1	Enhancers_Heart_47597
ENSFDAG00000009833	Sf1	Enhancers_Heart_47613
ENSFDAG00000007935	Pygm	Enhancers_Heart_47613
ENSFDAG00000007250	Nrxn2	Enhancers_Heart_47623
ENSFDAG00000016927	Slc22a12	Enhancers_Heart_47623
ENSFDAG00000015716	Stip1	Enhancers_Heart_47655
ENSFDAG00000009549	Flrt1	Enhancers_Heart_47655
ENSFDAG00000000132	Cep78	Enhancers_Heart_47956
ENSFDAG00000018106	N.A	Enhancers_Heart_47956,Enhancers_Heart_47976,Enhancers_Heart_47977
ENSFDAG00000006541	Pcsk5	Enhancers_Heart_48019,Enhancers_Heart_48020,Enhancers_Heart_48021,Enhancers_Heart_48025
ENSFDAG00000015617	Ostf1	Enhancers_Heart_48019,Enhancers_Heart_48020,Enhancers_Heart_48021,Enhancers_Heart_48025
ENSFDAG00000005710	Rorb	Enhancers_Heart_48044
ENSFDAG00000015128	Anxa1	Enhancers_Heart_48044
ENSFDAG00000015789	Tmc1	Enhancers_Heart_48072
ENSFDAG00000012375	Zfand5	Enhancers_Heart_48072,Enhancers_Heart_48095,Enhancers_Heart_48096
ENSFDAG00000003831	Gda	Enhancers_Heart_48095,Enhancers_Heart_48096
ENSFDAG00000012083	Trpm3	Enhancers_Heart_48169,Enhancers_Heart_48171,Enhancers_Heart_48173,Enhancers_Heart_48174
ENSFDAG00000008457	Klf9	Enhancers_Heart_48169,Enhancers_Heart_48171,Enhancers_Heart_48173,Enhancers_Heart_48174
ENSFDAG00000005361	Apba1	Enhancers_Heart_48271
ENSFDAG00000018921	Fam189a2	Enhancers_Heart_48271,Enhancers_Heart_48296
ENSFDAG00000017017	Tjp2	Enhancers_Heart_48296
ENSFDAG00000017726	Fxn	Enhancers_Heart_48327,Enhancers_Heart_48343,Enhancers_Heart_48352,Enhancers_Heart_48365
ENSFDAG00000014634	Pip5k1b	Enhancers_Heart_48327,Enhancers_Heart_48343,Enhancers_Heart_48352,Enhancers_Heart_48365,Enhancers_Heart_48370,Enhancers_Heart_48372
ENSFDAG00000001168	Fam122a	Enhancers_Heart_48370,Enhancers_Heart_48372,Enhancers_Heart_48379,Enhancers_Heart_48380,Enhancers_Heart_48381,Enhancers_Heart_48384,Enhancers_Heart_48391,Enhancers_Heart_48393
ENSFDAG00000013072	Tmem252	Enhancers_Heart_48379,Enhancers_Heart_48380,Enhancers_Heart_48381,Enhancers_Heart_48384,Enhancers_Heart_48391,Enhancers_Heart_48393,Enhancers_Heart_48412,Enhancers_Heart_48413,Enhancers_Heart_48451
ENSFDAG00000009523	Pgm5	Enhancers_Heart_48412,Enhancers_Heart_48413,Enhancers_Heart_48451
ENSFDAG00000005670	Dmrt1	Enhancers_Heart_48523,Enhancers_Heart_48524
ENSFDAG00000019682	Dmrt3	Enhancers_Heart_48523,Enhancers_Heart_48524
ENSFDAG00000010502	Smarca2	Enhancers_Heart_48561,Enhancers_Heart_48562
ENSFDAG00000010468	Vldlr	Enhancers_Heart_48561,Enhancers_Heart_48562
ENSFDAG00000018255	Glis3	Enhancers_Heart_48604,Enhancers_Heart_48605,Enhancers_Heart_48630,Enhancers_Heart_48632,Enhancers_Heart_48633,Enhancers_Heart_48634
ENSFDAG00000009747	Dkk1	Enhancers_Heart_48739,Enhancers_Heart_48753
ENSFDAG00000021170	Cstf2t	Enhancers_Heart_48753,Enhancers_Heart_48757,Enhancers_Heart_48758,Enhancers_Heart_48760
ENSFDAG00000008826	Prkg1	Enhancers_Heart_48757,Enhancers_Heart_48758,Enhancers_Heart_48760,Enhancers_Heart_48769,Enhancers_Heart_48770
ENSFDAG00000019371	A1cf	Enhancers_Heart_48769,Enhancers_Heart_48770
ENSFDAG00000005984	Asah2	Enhancers_Heart_48852
ENSFDAG00000012550	Sgms1	Enhancers_Heart_48852
ENSFDAG00000021258	Ciapin1	Enhancers_Heart_88901
ENSFDAG00000016918	Ccl17	Enhancers_Heart_88901
ENSFDAG00000004696	Pten	Enhancers_Heart_48900
ENSFDAG00000002016	Rnls	Enhancers_Heart_48900
ENSFDAG00000014562	Stambpl1	Enhancers_Heart_48911,Enhancers_Heart_48914,Enhancers_Heart_48916
ENSFDAG00000014772	Acta2	Enhancers_Heart_48911,Enhancers_Heart_48914,Enhancers_Heart_48916,Enhancers_Heart_48919
ENSFDAG00000014076	Fas	Enhancers_Heart_48919
ENSFDAG00000008975	Lgi1	Enhancers_Heart_49091
ENSFDAG00000021060	Slc35g1	Enhancers_Heart_49091
ENSFDAG00000004596	Pdlim1	Enhancers_Heart_49134,Enhancers_Heart_49167,Enhancers_Heart_49168
ENSFDAG00000018081	Sorbs1	Enhancers_Heart_49167,Enhancers_Heart_49168
ENSFDAG00000020858	Loxl4	Enhancers_Heart_49356,Enhancers_Heart_49358
ENSFDAG00000019820	Pyroxd2	Enhancers_Heart_49356,Enhancers_Heart_49358,Enhancers_Heart_49366
ENSFDAG00000008507	Hps1	Enhancers_Heart_49366
ENSFDAG00000020974	Dnmbp	Enhancers_Heart_49395
ENSFDAG00000015888	Camk1	Enhancers_Heart_49395
ENSFDAG00000005292	Chuk	Enhancers_Heart_49397
ENSFDAG00000010676	Twnk	Enhancers_Heart_49425
ENSFDAG00000002815	Lzts2	Enhancers_Heart_49425
ENSFDAG00000010750	Btrc	Enhancers_Heart_49451,Enhancers_Heart_49458
ENSFDAG00000016447	Poll	Enhancers_Heart_49451,Enhancers_Heart_49458
ENSFDAG00000002209	Gbf1	Enhancers_Heart_49498
ENSFDAG00000004662	Nfkb2	Enhancers_Heart_49498
ENSFDAG00000014589	Cfap58	Enhancers_Heart_49704
ENSFDAG00000011317	Sorcs3	Enhancers_Heart_49704
ENSFDAG00000008068	Add1	Enhancers_Heart_70011
ENSFDAG00000010654	Nrap	Enhancers_Heart_49961
ENSFDAG00000008248	Habp2	Enhancers_Heart_49961
ENSFDAG00000013418	Plekhs1	Enhancers_Heart_49973
ENSFDAG00000012510	Casp7	Enhancers_Heart_49973
ENSFDAG00000004873	Adrb1	Enhancers_Heart_49992,Enhancers_Heart_50000,Enhancers_Heart_50001
ENSFDAG00000018206	Nhlrc2	Enhancers_Heart_49992,Enhancers_Heart_50000,Enhancers_Heart_50001
ENSFDAG00000008811	Afap1l2	Enhancers_Heart_50077
ENSFDAG00000005563	Gfra1	Enhancers_Heart_50157,Enhancers_Heart_50160,Enhancers_Heart_50161
ENSFDAG00000014074	Rsrc2	Enhancers_Heart_50157,Enhancers_Heart_50160,Enhancers_Heart_50161
ENSFDAG00000005402	Frmd4a	Enhancers_Heart_50367
ENSFDAG00000014026	Prpf18	Enhancers_Heart_50367
ENSFDAG00000016616	N.A	Enhancers_Heart_50401
ENSFDAG00000016032	Usp6nl	Enhancers_Heart_50448,Enhancers_Heart_50449,Enhancers_Heart_50450,Enhancers_Heart_50451
ENSFDAG00000015074	Celf2	Enhancers_Heart_50448,Enhancers_Heart_50449,Enhancers_Heart_50450,Enhancers_Heart_50451,Enhancers_Heart_50466,Enhancers_Heart_50473,Enhancers_Heart_50502,Enhancers_Heart_50505,Enhancers_Heart_50507,Enhancers_Heart_50520
ENSFDAG00000008071	Itih2	Enhancers_Heart_50530,Enhancers_Heart_50531
ENSFDAG00000016386	Itih5	Enhancers_Heart_50530,Enhancers_Heart_50531
ENSFDAG00000008423	Prkcq	Enhancers_Heart_50553
ENSFDAG00000000708	Pfkfb3	Enhancers_Heart_50553
ENSFDAG00000012515	Plxdc2	Enhancers_Heart_50765,Enhancers_Heart_50766,Enhancers_Heart_50767
ENSFDAG00000019868	N.A	Enhancers_Heart_50771,Enhancers_Heart_50775,Enhancers_Heart_50776,Enhancers_Heart_50780,Enhancers_Heart_50787,Enhancers_Heart_50794,Enhancers_Heart_50795,Enhancers_Heart_50796,Enhancers_Heart_50797,Enhancers_Heart_50798,Enhancers_Heart_50799,Enhancers_Heart_50801,Enhancers_Heart_50802,Enhancers_Heart_50805,Enhancers_Heart_50807,Enhancers_Heart_50808,Enhancers_Heart_50811
ENSFDAG00000016939	Skida1	Enhancers_Heart_50808,Enhancers_Heart_50811
ENSFDAG00000013264	Pip4k2a	Enhancers_Heart_50858
ENSFDAG00000017978	Armc3	Enhancers_Heart_50858
ENSFDAG00000015648	Etl4	Enhancers_Heart_50868,Enhancers_Heart_50869,Enhancers_Heart_50870,Enhancers_Heart_50871,Enhancers_Heart_50873,Enhancers_Heart_50881,Enhancers_Heart_50883,Enhancers_Heart_50887,Enhancers_Heart_50889,Enhancers_Heart_50891,Enhancers_Heart_50894,Enhancers_Heart_50901,Enhancers_Heart_50909,Enhancers_Heart_50917,Enhancers_Heart_50918,Enhancers_Heart_50919,Enhancers_Heart_50920,Enhancers_Heart_50936,Enh…
ENSFDAG00000015332	Msrb2	Enhancers_Heart_50868,Enhancers_Heart_50869,Enhancers_Heart_50870,Enhancers_Heart_50871,Enhancers_Heart_50873,Enhancers_Heart_50881,Enhancers_Heart_50883,Enhancers_Heart_50887,Enhancers_Heart_50889,Enhancers_Heart_50891,Enhancers_Heart_50894,Enhancers_Heart_50901,Enhancers_Heart_50909,Enhancers_Heart_50917,Enhancers_Heart_50918,Enhancers_Heart_50919,Enhancers_Heart_50920
ENSFDAG00000011901	Arhgap21	Enhancers_Heart_50936,Enhancers_Heart_50944,Enhancers_Heart_50953,Enhancers_Heart_50960,Enhancers_Heart_50968,Enhancers_Heart_50969,Enhancers_Heart_50973,Enhancers_Heart_50999,Enhancers_Heart_51000,Enhancers_Heart_51009,Enhancers_Heart_51016
ENSFDAG00000000154	Enkur	Enhancers_Heart_50999,Enhancers_Heart_51000,Enhancers_Heart_51009,Enhancers_Heart_51016,Enhancers_Heart_51030,Enhancers_Heart_51032
ENSFDAG00000014234	Thnsl1	Enhancers_Heart_51030,Enhancers_Heart_51032
ENSFDAG00000011956	Pdss1	Enhancers_Heart_51052
ENSFDAG00000020986	Abi1	Enhancers_Heart_51052
ENSFDAG00000016460	Tbpl2	Enhancers_Heart_51061,Enhancers_Heart_51062
ENSFDAG00000018211	Tmem141	Enhancers_Heart_51126
ENSFDAG00000005744	N.A	Enhancers_Heart_51126
ENSFDAG00000011615	Med27	Enhancers_Heart_51444,Enhancers_Heart_51445
ENSFDAG00000010074	Rapgef1	Enhancers_Heart_51444,Enhancers_Heart_51445,Enhancers_Heart_51473
ENSFDAG00000009865	Gm13420	Enhancers_Heart_51473
ENSFDAG00000014773	Sptan1	Enhancers_Heart_51482,Enhancers_Heart_51484,Enhancers_Heart_51485
ENSFDAG00000000986	Dync2i2	Enhancers_Heart_51484,Enhancers_Heart_51485
ENSFDAG00000014778	Lamc3	Enhancers_Heart_51667
ENSFDAG00000002421	Aif1l	Enhancers_Heart_51667
ENSFDAG00000009155	N.A	Enhancers_Heart_51671
ENSFDAG00000008361	Nup214	Enhancers_Heart_51684
ENSFDAG00000015431	Fam78a	Enhancers_Heart_51684
ENSFDAG00000000836	Niban2	Enhancers_Heart_51818
ENSFDAG00000021311	Rpl12	Enhancers_Heart_51818
ENSFDAG00000015903	Angptl2	Enhancers_Heart_51881
ENSFDAG00000014915	Ralgps1	Enhancers_Heart_51881
ENSFDAG00000014765	Mvb12b	Enhancers_Heart_51933
ENSFDAG00000017614	Dab2ip	Enhancers_Heart_52080,Enhancers_Heart_52107,Enhancers_Heart_52109,Enhancers_Heart_52111
ENSFDAG00000011636	Ttll11	Enhancers_Heart_52080,Enhancers_Heart_52107,Enhancers_Heart_52109,Enhancers_Heart_52111,Enhancers_Heart_52117
ENSFDAG00000013240	Morn5	Enhancers_Heart_52117
ENSFDAG00000010970	Ndufa8	Enhancers_Heart_52126
ENSFDAG00000016594	Lhx6	Enhancers_Heart_52126
ENSFDAG00000012174	Crb2	Enhancers_Heart_52169
ENSFDAG00000017142	Dennd1a	Enhancers_Heart_52169
ENSFDAG00000013004	Lhx2	Enhancers_Heart_52180
ENSFDAG00000003338	Nek6	Enhancers_Heart_52180,Enhancers_Heart_52213,Enhancers_Heart_52215,Enhancers_Heart_52221,Enhancers_Heart_52222
ENSFDAG00000018938	Psmb7	Enhancers_Heart_52213,Enhancers_Heart_52215,Enhancers_Heart_52221,Enhancers_Heart_52222
ENSFDAG00000019034	Nr5a1	Enhancers_Heart_52226
ENSFDAG00000021444	Nr6a1	Enhancers_Heart_52226
ENSFDAG00000011376	Arpc5l	Enhancers_Heart_52242
ENSFDAG00000017283	Golga1	Enhancers_Heart_52242
ENSFDAG00000010773	Arhgap15	Enhancers_Heart_52284
ENSFDAG00000018254	Gtdc1	Enhancers_Heart_52284
ENSFDAG00000004686	Zeb2	Enhancers_Heart_52357
ENSFDAG00000000532	Lypd6b	Enhancers_Heart_52407
ENSFDAG00000013124	Lypd6	Enhancers_Heart_52407,Enhancers_Heart_52412,Enhancers_Heart_52413
ENSFDAG00000019104	Mmadhc	Enhancers_Heart_52412,Enhancers_Heart_52413,Enhancers_Heart_52433,Enhancers_Heart_52451
ENSFDAG00000008589	Rnd3	Enhancers_Heart_52433,Enhancers_Heart_52451
ENSFDAG00000003173	Cacnb4	Enhancers_Heart_52510
ENSFDAG00000004623	Stam2	Enhancers_Heart_52510
ENSFDAG00000007195	Acvr1	Enhancers_Heart_52589
ENSFDAG00000017907	Upp2	Enhancers_Heart_52589
ENSFDAG00000017127	Pkp4	Enhancers_Heart_52614,Enhancers_Heart_52627,Enhancers_Heart_52631,Enhancers_Heart_52634
ENSFDAG00000001796	Dapl1	Enhancers_Heart_52614,Enhancers_Heart_52627,Enhancers_Heart_52631,Enhancers_Heart_52634
ENSFDAG00000000093	Tanc1	Enhancers_Heart_52698,Enhancers_Heart_52704,Enhancers_Heart_52708,Enhancers_Heart_52713,Enhancers_Heart_52718,Enhancers_Heart_52728,Enhancers_Heart_52731
ENSFDAG00000012994	Wdsub1	Enhancers_Heart_52698,Enhancers_Heart_52704,Enhancers_Heart_52708,Enhancers_Heart_52713,Enhancers_Heart_52718,Enhancers_Heart_52728,Enhancers_Heart_52731
ENSFDAG00000000985	Ly75	Enhancers_Heart_52769
ENSFDAG00000007815	Pla2r1	Enhancers_Heart_52769
ENSFDAG00000007714	Itgb6	Enhancers_Heart_52796
ENSFDAG00000015692	Rbms1	Enhancers_Heart_52796,Enhancers_Heart_52855
ENSFDAG00000010413	Tank	Enhancers_Heart_52855
ENSFDAG00000019771	Kcnh7	Enhancers_Heart_52898,Enhancers_Heart_52900,Enhancers_Heart_52901,Enhancers_Heart_52903,Enhancers_Heart_52904,Enhancers_Heart_52913,Enhancers_Heart_52932
ENSFDAG00000014550	Fign	Enhancers_Heart_52898,Enhancers_Heart_52900,Enhancers_Heart_52901,Enhancers_Heart_52903,Enhancers_Heart_52904,Enhancers_Heart_52913,Enhancers_Heart_52932,Enhancers_Heart_52939,Enhancers_Heart_52945
ENSFDAG00000006600	Grb14	Enhancers_Heart_52939,Enhancers_Heart_52945,Enhancers_Heart_52969,Enhancers_Heart_52971
ENSFDAG00000000913	Cobll1	Enhancers_Heart_52969,Enhancers_Heart_52971
ENSFDAG00000010118	Scn2a	Enhancers_Heart_53013
ENSFDAG00000009119	Csrnp3	Enhancers_Heart_53013
ENSFDAG00000017530	B3galt1	Enhancers_Heart_53040,Enhancers_Heart_53044,Enhancers_Heart_53067
ENSFDAG00000011416	Stk39	Enhancers_Heart_53040,Enhancers_Heart_53044,Enhancers_Heart_53067,Enhancers_Heart_53082
ENSFDAG00000013212	Tmem38b	Enhancers_Heart_64174
ENSFDAG00000014343	Cers6	Enhancers_Heart_53082,Enhancers_Heart_53092
ENSFDAG00000006444	Nostrin	Enhancers_Heart_53092
ENSFDAG00000018836	Dhrs9	Enhancers_Heart_53110
ENSFDAG00000007029	Ubr3	Enhancers_Heart_53123,Enhancers_Heart_53126
ENSFDAG00000005326	Myo3b	Enhancers_Heart_53123,Enhancers_Heart_53126
ENSFDAG00000020546	Gorasp2	Enhancers_Heart_53135
ENSFDAG00000008772	Tlk1	Enhancers_Heart_53135
ENSFDAG00000016421	Dync1i2	Enhancers_Heart_53149
ENSFDAG00000004224	Slc25a12	Enhancers_Heart_53149
ENSFDAG00000015671	Dlx2	Enhancers_Heart_53186
ENSFDAG00000020202	Itga6	Enhancers_Heart_53186
ENSFDAG00000007385	Cdca7	Enhancers_Heart_53290
ENSFDAG00000018454	Sp3	Enhancers_Heart_53290
ENSFDAG00000019300	Mtx2	Enhancers_Heart_53401
ENSFDAG00000004292	Fth1	Enhancers_Heart_53401
ENSFDAG00000006448	Nfe2l2	Enhancers_Heart_53455
ENSFDAG00000011770	Agps	Enhancers_Heart_53455,Enhancers_Heart_53475
ENSFDAG00000011998	Ttc30a2	Enhancers_Heart_53475
ENSFDAG00000006396	N.A	Enhancers_Heart_53508,Enhancers_Heart_53509,Enhancers_Heart_53511,Enhancers_Heart_53513,Enhancers_Heart_53514
ENSFDAG00000013519	N.A	Enhancers_Heart_53508,Enhancers_Heart_53509,Enhancers_Heart_53511,Enhancers_Heart_53513,Enhancers_Heart_53514
ENSFDAG00000005471	N.A	Enhancers_Heart_53519
ENSFDAG00000018464	Ttn	Enhancers_Heart_53519,Enhancers_Heart_53524,Enhancers_Heart_53536
ENSFDAG00000021152	Ccdc141	Enhancers_Heart_53524,Enhancers_Heart_53536
ENSFDAG00000014276	Sestd1	Enhancers_Heart_53589
ENSFDAG00000021322	Zfp385b	Enhancers_Heart_53589
ENSFDAG00000017041	Cdc42	Enhancers_Heart_53641
ENSFDAG00000013457	Dnajc10	Enhancers_Heart_53641,Enhancers_Heart_53649
ENSFDAG00000003666	Frzb	Enhancers_Heart_53649,Enhancers_Heart_53650
ENSFDAG00000014116	Nckap1	Enhancers_Heart_53650
ENSFDAG00000015036	Diaph2	Enhancers_Heart_97350
ENSFDAG00000006641	Ptprj	Enhancers_Heart_53829
ENSFDAG00000012401	Nup160	Enhancers_Heart_53829
ENSFDAG00000015022	Madd	Enhancers_Heart_53870
ENSFDAG00000015057	Nr1h3	Enhancers_Heart_53870
ENSFDAG00000011816	Ambra1	Enhancers_Heart_53937
ENSFDAG00000013992	Chrm4	Enhancers_Heart_53937
ENSFDAG00000004625	Cry2	Enhancers_Heart_53993,Enhancers_Heart_53996
ENSFDAG00000006670	Slc35c1	Enhancers_Heart_53993,Enhancers_Heart_53996
ENSFDAG00000005795	Alx4	Enhancers_Heart_54116
ENSFDAG00000010533	Ext2	Enhancers_Heart_54116
ENSFDAG00000016366	Gm13889	Enhancers_Heart_54143
ENSFDAG00000012666	Gm27027	Enhancers_Heart_54143
ENSFDAG00000006866	Hsd17b12	Enhancers_Heart_54155
ENSFDAG00000019001	Ttc17	Enhancers_Heart_54155
ENSFDAG00000004432	Lrrc4c	Enhancers_Heart_54168
ENSFDAG00000020194	Cd44	Enhancers_Heart_54298
ENSFDAG00000014448	Pdhx	Enhancers_Heart_54298
ENSFDAG00000014401	Elf5	Enhancers_Heart_54303
ENSFDAG00000012137	Cat	Enhancers_Heart_54303
ENSFDAG00000020847	Abtb2	Enhancers_Heart_54329,Enhancers_Heart_54330,Enhancers_Heart_54331,Enhancers_Heart_54332,Enhancers_Heart_54335,Enhancers_Heart_54345
ENSFDAG00000010525	Nat10	Enhancers_Heart_54329,Enhancers_Heart_54330,Enhancers_Heart_54331,Enhancers_Heart_54332,Enhancers_Heart_54335,Enhancers_Heart_54345
ENSFDAG00000011911	D430041D05Rik	Enhancers_Heart_54373,Enhancers_Heart_54386
ENSFDAG00000010548	Hipk3	Enhancers_Heart_54373,Enhancers_Heart_54386
ENSFDAG00000011573	Eif3m	Enhancers_Heart_54399
ENSFDAG00000006720	Wt1	Enhancers_Heart_54399
ENSFDAG00000008567	Elp4	Enhancers_Heart_54416
ENSFDAG00000018190	Dnajc24	Enhancers_Heart_54416
ENSFDAG00000000743	Arhgap11a	Enhancers_Heart_54541,Enhancers_Heart_54552
ENSFDAG00000013208	Gjd2	Enhancers_Heart_54541,Enhancers_Heart_54552
ENSFDAG00000014942	Actc1	Enhancers_Heart_54561,Enhancers_Heart_54568
ENSFDAG00000000252	Aqr	Enhancers_Heart_54561,Enhancers_Heart_54568,Enhancers_Heart_54569
ENSFDAG00000008923	Zfp770	Enhancers_Heart_54569
ENSFDAG00000011598	Rps6	Enhancers_Heart_54834,Enhancers_Heart_65103
ENSFDAG00000014687	Rprd1b	Enhancers_Heart_54874,Enhancers_Heart_56776,Enhancers_Heart_56782,Enhancers_Heart_56789
ENSFDAG00000009376	Tgm2	Enhancers_Heart_54874,Enhancers_Heart_56776,Enhancers_Heart_56782,Enhancers_Heart_56789
ENSFDAG00000015914	Frmd5	Enhancers_Heart_54897,Enhancers_Heart_54899,Enhancers_Heart_54900,Enhancers_Heart_54901,Enhancers_Heart_54903
[truncated: 1,389 more rows]

## Sheet: Enhancers Heart DOWN genes all
Ensembl gene id (Fdam)	Gene name	Enhancers Heart DOWN
[truncated: 2,819 more rows]
