# Supplementary material for: Phylogenetic modeling of enhancer shifts in African mole-rats reveals regulatory changes associated with tissue-specific traits
Source: HighWire-hosted journal article supplement (doi:10.1101/gr.277715.123), 2023-08-25
Supplement: Supplemental_Table_S4.xlsx [file Supplemental_Table_S4.xlsx]

## Sheet: Liver enhancers up ancestral mo
	Supplemental Table S4. Gene ontology enrichments (TOP 100) for enhancers with an activity shift in the ancestral mole-rat branch. For each element set, we report gene ontologies signficantly associated to enhancers with an activity shift in the ancestral mole-rat branch (GREAT enrichment tests using the DMR genome, Methods). Columns are as follows; GO: gene ontology id, name: gene ontology name, …
GO	Name	Binom Enrichment	# foreground regions	# expected regions	Binom BH p-value	Hyper Enrichment	# foreground genes	# expected genes	Hyper BH p-value	Genes		Regions
GO:0001889	liver development	2.81693	76	26.9797	5.34e-12	1.94595	24	12.3333	0.0184	Ada,Ahr,Arf6,Atg7,Cadm1,Ccnd1,Gm28047,Hgf,Hp,Itpr1,Jarid2,Jun,Man2a1,Met,Mrtfb,Notch2,Onecut1,Onecut2,Pkd2,Rb1cc1,Smad3,Tgfbr3,Upf2,Vwf		Enhancers_Liver_17835,Enhancers_Liver_18463,Enhancers_Liver_22299,Enhancers_Liver_22341,Enhancers_Liver_30,Enhancers_Liver_32842,Enhancers_Liver_33328,Enhancers_Liver_33333,Enhancers_Liver_33335,Enhancers_Liver_38366,Enhancers_Liver_38372,Enhancers_Liver_38374,Enhancers_Liver_38375,Enhancers_Liver_38379,Enhancers_Liver_38436,Enhancers_Liver_42221,Enhancers_Liver_46286,Enhancers_Liver_52343,Enhanc…
GO:0061614	miRNA transcription	2.50222	90	35.9681	1.93e-11	2.20588	25	11.3333	0.00326	Apln,App,Bmp2,Bmp4,Egr1,Ets1,Hif1a,Jun,Klf5,Mrtfa,Mrtfb,Nfatc3,Nfib,Nfkb1,Nr3c1,Ppara,Pparg,Smad1,Smad3,Sox9,Tead1,Tgfb2,Tgfbr1,Trp53,Wt1		Enhancers_Liver_13483,Enhancers_Liver_16226,Enhancers_Liver_16227,Enhancers_Liver_16228,Enhancers_Liver_16229,Enhancers_Liver_16234,Enhancers_Liver_16262,Enhancers_Liver_16282,Enhancers_Liver_16283,Enhancers_Liver_18819,Enhancers_Liver_18820,Enhancers_Liver_26673,Enhancers_Liver_26674,Enhancers_Liver_26709,Enhancers_Liver_26711,Enhancers_Liver_26714,Enhancers_Liver_26715,Enhancers_Liver_26716,Enh…
GO:0048732	gland development	1.81985	181	99.4588	3.82e-11	1.65333	62	37.5	0.00211	Ada,Ahr,Aldh1a3,Arf6,Arhgap35,Asxl1,Atg7,Bmp4,Cadm1,Ccnb2,Ccnd1,Creb1,Edn1,Ephb3,Ext1,Fgfr2,Gli2,Gli3,Gm28047,Gm9774,Hgf,Hp,Igf1,Igf1r,Igf2,Insr,Irs1,Itpr1,Jarid2,Jun,Lbh,Lmo4,Man2a1,Map2k1,Mapk1,Met,Mrtfb,Nfatc3,Nkx2-5,Notch2,Nr3c1,Nr5a1,Onecut1,Onecut2,Pbx1,Pdgfra,Pkd2,Psen1,Ptch1,Rb1cc1,Shh,Six1,Smad2,Smad3,Sox9,Stra6,Tbx3,Tgfbr1,Tgfbr3,Upf2,Vwf,Wt1		Enhancers_Liver_12163,Enhancers_Liver_12164,Enhancers_Liver_16226,Enhancers_Liver_16227,Enhancers_Liver_16228,Enhancers_Liver_16229,Enhancers_Liver_16234,Enhancers_Liver_1626,Enhancers_Liver_16262,Enhancers_Liver_1627,Enhancers_Liver_16282,Enhancers_Liver_16283,Enhancers_Liver_17835,Enhancers_Liver_18463,Enhancers_Liver_18755,Enhancers_Liver_19520,Enhancers_Liver_19521,Enhancers_Liver_21197,Enhan…
GO:0051056	regulation of small GTPase mediated signal transduction	1.84004	170	92.389	9.16e-11	1.82488	66	36.1667	0.000115	Abca1,Abl2,Abra,Adgrg1,Adra1a,Akap13,Apoe,Arap3,Arf6,Arhgap18,Arhgap24,Arhgap25,Arhgap26,Arhgap28,Arhgap35,Arhgef18,Arhgef3,Auts2,Auts2,Bcr,Cdc42bpa,Cdc42se2,Cdh2,Cdon,Csf1,Cyrib,Cyth1,Dab2ip,Dgki,Dlc1,Eps8,Erbin,F2r,Fbxo8,Garnl3,Gpr55,Gpr65,Igf1,Kank1,Map2k1,Map4k4,Mapkap1,Mapre2,Met,Net1,Notch2,Nrg1,Nrp1,Ophn1,Pik3cb,Pik3cg,Psd3,Ralbp1,Ralgapa2,Ralgps1,Rap1gap2,Rasa4,Rasgrp4,Sipa1l1,Sipa1l3,Sos…		Enhancers_Liver_12842,Enhancers_Liver_13747,Enhancers_Liver_14156,Enhancers_Liver_16659,Enhancers_Liver_16680,Enhancers_Liver_16686,Enhancers_Liver_16689,Enhancers_Liver_17666,Enhancers_Liver_17667,Enhancers_Liver_17684,Enhancers_Liver_17685,Enhancers_Liver_17688,Enhancers_Liver_17700,Enhancers_Liver_17701,Enhancers_Liver_17704,Enhancers_Liver_17710,Enhancers_Liver_18463,Enhancers_Liver_18495,Enh…
GO:0019216	regulation of lipid metabolic process	1.70462	202	118.501	4.54e-10	1.36585	84	61.5	0.0298	Abcb11,Acacb,Alk,Angptl3,Apoe,App,Appl2,Atg7,Atp1a1,Bmp2,Ccn1,Cdc42,Ceacam10,Ces1c,Ces1c,Creb1,Crebl2,Dab2,Dab2ip,Disp3,Dnajc15,Egr1,Elovl5,Ephx2,Erlin2,Esr1,Fabp5,Fdps,Fgf1,Fgr,Flt1,Foxa2,Gal,Ghsr,Hnf4a,Hsd17b13,Hsd3b4,Idh1,Igf1,Igf1r,Igf2,Igfbp7,Irs1,Isx,Kcnma1,Lactb,Ldlr,Lhcgr,Lmf1,Lonp2,Lpgat1,Malrd1,Mid1ip1,Mlxipl,Mtmr2,Ncoa2,Nfkb1,Nr1d2,Nr3c1,Ormdl2,Pde8b,Pdgfra,Pik3cg,Pik3ip1,Pik3r4,Ppara,…		Enhancers_Liver_106,Enhancers_Liver_107,Enhancers_Liver_11182,Enhancers_Liver_112,Enhancers_Liver_11216,Enhancers_Liver_16226,Enhancers_Liver_16227,Enhancers_Liver_16228,Enhancers_Liver_16229,Enhancers_Liver_16234,Enhancers_Liver_1626,Enhancers_Liver_16262,Enhancers_Liver_1627,Enhancers_Liver_16282,Enhancers_Liver_16283,Enhancers_Liver_1692,Enhancers_Liver_17666,Enhancers_Liver_17667,Enhancers_Li…
GO:0110149	regulation of biomineralization	2.20091	99	44.9815	7.61e-10	1.82609	28	15.3333	0.0206	Acvr2a,Alox5,Ank,Ano6,Bcor,Bmp2,Bmp4,Bmpr1b,Ccn1,Ddr2,Dicer1,Ecm1,Enpp1,Fbln7,Fgf23,Hey1,Hif1a,Matn1,Nos3,Pkdcc,Ptn,Rflnb,S1pr1,Slc4a2,Smad3,Sox9,Tent5a,Txlng		Enhancers_Liver_13926,Enhancers_Liver_16226,Enhancers_Liver_16227,Enhancers_Liver_16228,Enhancers_Liver_16229,Enhancers_Liver_16234,Enhancers_Liver_16262,Enhancers_Liver_16282,Enhancers_Liver_16283,Enhancers_Liver_18819,Enhancers_Liver_18820,Enhancers_Liver_20400,Enhancers_Liver_26673,Enhancers_Liver_26674,Enhancers_Liver_26709,Enhancers_Liver_26711,Enhancers_Liver_26714,Enhancers_Liver_26715,Enh…
GO:0010634	positive regulation of epithelial cell migration	1.84405	152	82.4273	1.01e-09	1.7561	48	27.3333	0.00284	Adam17,Akt3,Amotl1,Angpt1,Arf6,Atp5a1,Bcas3,Bmp4,Cib1,Clasp1,Col18a1,Ctsh,Dicer1,Dock5,Ets1,Fgf1,Foxp1,Has2,Hdac6,Hdac9,Hif1a,Hmgb1,Igf1,Igf2,Irs1,Itga2,Itgb3,Jun,Kdr,Map4k4,Mapre2,Met,Nos3,Nrp1,Pik3cb,Pik3cg,Plk2,Prkce,Rock2,Sash1,Shh,Sox9,Tacr1,Tgfb2,Tgfbr2,Vegfa,Vegfc,Wnt5a		Enhancers_Liver_14561,Enhancers_Liver_14586,Enhancers_Liver_152,Enhancers_Liver_155,Enhancers_Liver_156,Enhancers_Liver_15729,Enhancers_Liver_15730,Enhancers_Liver_16226,Enhancers_Liver_16227,Enhancers_Liver_16228,Enhancers_Liver_16229,Enhancers_Liver_16234,Enhancers_Liver_16262,Enhancers_Liver_16282,Enhancers_Liver_16283,Enhancers_Liver_17328,Enhancers_Liver_17418,Enhancers_Liver_17666,Enhancers…
GO:0007264	small GTPase mediated signal transduction	1.59135	246	154.586	1.03e-09	1.53659	105	68.3333	0.000367	Abca1,Abl2,Abra,Adgrg1,Adra1a,Adrb1,Agtr1b,Akap13,Apoe,Arap3,Arf6,Arhgap18,Arhgap24,Arhgap25,Arhgap26,Arhgap28,Arhgap31,Arhgap35,Arhgap8,Arhgef18,Arhgef3,Arl3,Auts2,Auts2,Bcar3,Bcr,Cdc42,Cdc42bpa,Cdc42ep3,Cdc42se2,Cdh2,Cdon,Celsr1,Col1a2,Csf1,Cyrib,Cyth1,Dab2ip,Dgki,Dlc1,Dnaja3,Dock5,Dock7,Dok2,Eps8,Erbin,F2r,Fbxo8,G3bp2,Garnl3,Gpr55,Gpr65,Hacd3,Igf1,Iqgap3,Jun,Kank1,Map2k1,Map4k4,Mapkap1,Mapre2,…		Enhancers_Liver_12842,Enhancers_Liver_13747,Enhancers_Liver_14156,Enhancers_Liver_14303,Enhancers_Liver_15841,Enhancers_Liver_16659,Enhancers_Liver_16680,Enhancers_Liver_16686,Enhancers_Liver_16689,Enhancers_Liver_17328,Enhancers_Liver_17666,Enhancers_Liver_17667,Enhancers_Liver_17684,Enhancers_Liver_17685,Enhancers_Liver_17688,Enhancers_Liver_17700,Enhancers_Liver_17701,Enhancers_Liver_17704,Enh…
GO:0070167	regulation of biomineral tissue development	2.18889	98	44.7716	1.05e-09	1.78022	27	15.1667	0.0309	Acvr2a,Alox5,Ank,Ano6,Bcor,Bmp2,Bmp4,Bmpr1b,Ccn1,Ddr2,Dicer1,Ecm1,Enpp1,Fgf23,Hey1,Hif1a,Matn1,Nos3,Pkdcc,Ptn,Rflnb,S1pr1,Slc4a2,Smad3,Sox9,Tent5a,Txlng		Enhancers_Liver_13926,Enhancers_Liver_16226,Enhancers_Liver_16227,Enhancers_Liver_16228,Enhancers_Liver_16229,Enhancers_Liver_16234,Enhancers_Liver_16262,Enhancers_Liver_16282,Enhancers_Liver_16283,Enhancers_Liver_18819,Enhancers_Liver_18820,Enhancers_Liver_20400,Enhancers_Liver_26673,Enhancers_Liver_26674,Enhancers_Liver_26709,Enhancers_Liver_26711,Enhancers_Liver_26714,Enhancers_Liver_26715,Enh…
GO:0030500	regulation of bone mineralization	2.24275	93	41.467	1.18e-09	1.84	23	12.5	0.0389	Acvr2a,Alox5,Ank,Ano6,Bcor,Bmp2,Bmp4,Bmpr1b,Ccn1,Ddr2,Ecm1,Enpp1,Fgf23,Hif1a,Matn1,Pkdcc,Ptn,Rflnb,S1pr1,Smad3,Sox9,Tent5a,Txlng		Enhancers_Liver_13926,Enhancers_Liver_16226,Enhancers_Liver_16227,Enhancers_Liver_16228,Enhancers_Liver_16229,Enhancers_Liver_16234,Enhancers_Liver_16262,Enhancers_Liver_16282,Enhancers_Liver_16283,Enhancers_Liver_18819,Enhancers_Liver_18820,Enhancers_Liver_26673,Enhancers_Liver_26674,Enhancers_Liver_26709,Enhancers_Liver_26711,Enhancers_Liver_26714,Enhancers_Liver_26715,Enhancers_Liver_26716,Enh…
GO:0007265	Ras protein signal transduction	1.6663	200	120.026	2.27e-09	1.51402	81	53.5	0.00326	Abca1,Abl2,Abra,Adgrg1,Adra1a,Adrb1,Agtr1b,Akap13,Apoe,Arap3,Arf6,Arhgap24,Arhgap35,Arhgef18,Arhgef3,Auts2,Auts2,Bcr,Cdc42,Cdc42ep3,Cdc42se2,Cdh2,Celsr1,Col1a2,Csf1,Cyth1,Dab2ip,Dgki,Dlc1,Dok2,Eps8,Erbin,F2r,Fbxo8,Gpr55,Gpr65,Hacd3,Igf1,Iqgap3,Jun,Kank1,Map2k1,Map4k4,Mapkap1,Mapre2,Met,Mras,Net1,Notch2,Nrg1,Nrp1,Ophn1,Pecam1,Pik3cb,Pik3cg,Plk2,Psd3,Rab12,Rab30,Rab9,Rala,Ralbp1,Ralgapa2,Ralgps1,Ra…		Enhancers_Liver_12842,Enhancers_Liver_14156,Enhancers_Liver_15841,Enhancers_Liver_16659,Enhancers_Liver_16680,Enhancers_Liver_16686,Enhancers_Liver_16689,Enhancers_Liver_17328,Enhancers_Liver_17666,Enhancers_Liver_17667,Enhancers_Liver_17684,Enhancers_Liver_17685,Enhancers_Liver_17688,Enhancers_Liver_17700,Enhancers_Liver_17701,Enhancers_Liver_17704,Enhancers_Liver_17710,Enhancers_Liver_18463,Enh…
GO:1902895	positive regulation of miRNA transcription	2.58527	68	26.3029	2.88e-09	2.30769	20	8.66667	0.00639	Apln,Bmp2,Bmp4,Egr1,Ets1,Hif1a,Jun,Klf5,Mrtfa,Mrtfb,Nfkb1,Nr3c1,Pparg,Smad1,Smad3,Tead1,Tgfb2,Tgfbr1,Trp53,Wt1		Enhancers_Liver_13483,Enhancers_Liver_18819,Enhancers_Liver_18820,Enhancers_Liver_26673,Enhancers_Liver_26674,Enhancers_Liver_26709,Enhancers_Liver_26711,Enhancers_Liver_26714,Enhancers_Liver_26715,Enhancers_Liver_26716,Enhancers_Liver_26717,Enhancers_Liver_26725,Enhancers_Liver_28413,Enhancers_Liver_28420,Enhancers_Liver_28421,Enhancers_Liver_28427,Enhancers_Liver_31779,Enhancers_Liver_33328,Enh…
GO:0010632	regulation of epithelial cell migration	1.63886	202	123.257	6.85e-09	1.68293	69	41	0.000672	Adam17,Adamts9,Adgrb1,Akt3,Amotl1,Angpt1,Apoe,Arf6,Arsb,Atp5a1,Bcas3,Bmp10,Bmp4,Cd63,Ceacam10,Cib1,Clasp1,Col18a1,Coro1c,Ctsh,Dab2ip,Dicer1,Dock5,Emp2,Ets1,Fbxw7,Fgf1,Foxp1,Glul,Has2,Hdac6,Hdac9,Hif1a,Hmgb1,Igf1,Igf2,Irs1,Itga2,Itgb3,Jun,Kdr,Map4k4,Mapre2,Mcc,Meox2,Met,Nos3,Nrp1,Pdcd10,Pfn2,Pik3cb,Pik3cg,Plk2,Pparg,Prkce,Pten,Ptprm,Rock2,Sash1,Sema3a,Shh,Sox9,Tacr1,Tgfb2,Tgfbr2,Tgfbr3,Vegfa,Vegfc…		Enhancers_Liver_11194,Enhancers_Liver_11196,Enhancers_Liver_14561,Enhancers_Liver_14586,Enhancers_Liver_152,Enhancers_Liver_155,Enhancers_Liver_156,Enhancers_Liver_15729,Enhancers_Liver_15730,Enhancers_Liver_16226,Enhancers_Liver_16227,Enhancers_Liver_16228,Enhancers_Liver_16229,Enhancers_Liver_16234,Enhancers_Liver_16262,Enhancers_Liver_16282,Enhancers_Liver_16283,Enhancers_Liver_17328,Enhancers…
GO:0032874	positive regulation of stress-activated MAPK cascade	2.05071	103	50.2265	8.26e-09	1.78626	39	21.8333	0.00611	App,Axin1,Bmp2,Bmp4,Cdc42,Ceacam10,Dab2,Dab2ip,Eda2r,Fgd4,Hipk2,Hmgb1,Lmnb1,Map3k1,Map3k5,Map3k7,Map4k4,Met,Mid1,Pdcd10,Pja2,Plcb1,Rb1cc1,Rell1,Ripk2,Sash1,Sh3rf1,Stk3,Stk39,Tgfb2,Tnfsf11,Tnik,Tpd52l1,Traf3,Trpv4,Vegfa,Wnt16,Wnt5a,Wnt7b		Enhancers_Liver_152,Enhancers_Liver_155,Enhancers_Liver_156,Enhancers_Liver_20639,Enhancers_Liver_23747,Enhancers_Liver_24662,Enhancers_Liver_24663,Enhancers_Liver_24664,Enhancers_Liver_26035,Enhancers_Liver_26036,Enhancers_Liver_26040,Enhancers_Liver_26673,Enhancers_Liver_26674,Enhancers_Liver_26709,Enhancers_Liver_26711,Enhancers_Liver_26714,Enhancers_Liver_26715,Enhancers_Liver_26716,Enhancers…
GO:0046578	regulation of Ras protein signal transduction	1.84048	137	74.437	1.06e-08	1.71892	53	30.8333	0.00232	Abca1,Abl2,Abra,Adgrg1,Adra1a,Akap13,Apoe,Arap3,Arf6,Arhgap24,Arhgap35,Arhgef18,Arhgef3,Auts2,Auts2,Bcr,Cdc42se2,Cdh2,Csf1,Cyth1,Dab2ip,Dgki,Dlc1,Eps8,Erbin,F2r,Fbxo8,Gpr55,Gpr65,Igf1,Kank1,Map2k1,Map4k4,Mapkap1,Mapre2,Met,Net1,Notch2,Nrg1,Nrp1,Ophn1,Pik3cb,Pik3cg,Psd3,Ralbp1,Ralgps1,Rasa4,Rasgrp4,Spry1,Spry4,Tgfb2,Timp2,Tnfaip1		Enhancers_Liver_12842,Enhancers_Liver_14156,Enhancers_Liver_16659,Enhancers_Liver_16680,Enhancers_Liver_16686,Enhancers_Liver_16689,Enhancers_Liver_17666,Enhancers_Liver_17667,Enhancers_Liver_17684,Enhancers_Liver_17685,Enhancers_Liver_17688,Enhancers_Liver_17700,Enhancers_Liver_17701,Enhancers_Liver_17704,Enhancers_Liver_17710,Enhancers_Liver_18463,Enhancers_Liver_19957,Enhancers_Liver_19958,Enh…
GO:0006979	response to oxidative stress	1.59819	202	126.393	4.38e-08	1.35584	87	64.1667	0.0309	1600014C10Rik,Abcc1,Aifm1,Aldh1a1,Aldh3b1,Alox5,Apoe,App,Atg7,Atrn,Bmp4,Brf2,Cln8,Dapk1,Ddr2,Edn1,Epas1,Ercc6l2,Fancc,Fbln5,Fbxo7,Fbxw7,Foxo1,Foxp1,Gab1,Gata4,Gch1,Gclm,Glrx,Hba-a2,Hdac6,Hgf,Hif1a,Ide,Idh1,Jun,Map2k1,Map3k5,Mapk1,Mapkap1,Mctp1,Met,Mpo,Msra,Msrb2,Mtf1,Ncoa7,Ndufa6,Ndufb4,Ndufs8,Neil1,Net1,Nfkb1,Nr4a2,Oxr1,Pawr,Pdcd10,Pdgfra,Plekha1,Pnpla8,Pnpt1,Ppargc1a,Ppargc1b,Ppif,Prdx6,Prkaa2,…		Enhancers_Liver_10347,Enhancers_Liver_10363,Enhancers_Liver_12052,Enhancers_Liver_12163,Enhancers_Liver_12164,Enhancers_Liver_12244,Enhancers_Liver_13483,Enhancers_Liver_14752,Enhancers_Liver_14756,Enhancers_Liver_1692,Enhancers_Liver_18124,Enhancers_Liver_18126,Enhancers_Liver_18819,Enhancers_Liver_18820,Enhancers_Liver_19520,Enhancers_Liver_19521,Enhancers_Liver_20176,Enhancers_Liver_2058,Enhan…
GO:0051403	stress-activated MAPK cascade	1.6838	165	97.9927	5.54e-08	1.75107	68	38.8333	0.000264	Aida,Aida,App,Axin1,Bmp2,Bmp4,Cdc42,Ceacam10,Dab2,Dab2ip,Dact1,Dlg1,Dusp1,Dusp16,Eda2r,Ephb1,Fgd4,Foxo1,Gm28047,Hacd3,Hgf,Hipk2,Hmgb1,Igbp1,Igf1r,Lmnb1,Map2k1,Map2k6,Map3k1,Map3k13,Map3k5,Map3k7,Map4k4,Mapk1,Mapk10,Mecom,Met,Mid1,Nfkb1,Pbk,Pdcd10,Phlpp1,Pja2,Plcb1,Rb1cc1,Rell1,Ripk2,Ror2,Sash1,Sfrp5,Sh3rf1,Sirpb1c,Smad3,Spag9,Stk3,Stk39,Tgfb2,Tnfsf11,Tnik,Tpd52l1,Traf3,Trib1,Trpv4,Vegfa,Wnt16,Wnt…		Enhancers_Liver_14988,Enhancers_Liver_14991,Enhancers_Liver_152,Enhancers_Liver_155,Enhancers_Liver_156,Enhancers_Liver_16181,Enhancers_Liver_16194,Enhancers_Liver_18659,Enhancers_Liver_19155,Enhancers_Liver_19156,Enhancers_Liver_19157,Enhancers_Liver_19217,Enhancers_Liver_19241,Enhancers_Liver_20639,Enhancers_Liver_22741,Enhancers_Liver_23747,Enhancers_Liver_24662,Enhancers_Liver_24663,Enhancers…
GO:0010631	epithelial cell migration	1.53232	232	151.405	6.19e-08	1.58095	83	52.5	0.000865	Adam17,Adamts9,Adgrb1,Akt3,Amotl1,Angpt1,Apoe,Arf6,Arsb,Atp5a1,Bcas3,Bmp10,Bmp4,Cd63,Cdh5,Ceacam10,Cib1,Clasp1,Clec14a,Col18a1,Coro1c,Ctsh,Dab2ip,Dicer1,Dock5,Egr3,Emp2,Ets1,Fbxw7,Fermt1,Fgf1,Foxp1,Glul,Has2,Hdac6,Hdac9,Hif1a,Hmgb1,Igf1,Igf2,Irs1,Itga2,Itgb3,Jun,Kank1,Kdr,Loxl2,Lpxn,Map4k4,Mapre2,Mcc,Meox2,Met,Myh9,Nos3,Nrp1,Pdcd10,Pecam1,Pfn2,Pik3cb,Pik3cg,Pkn2,Plk2,Pparg,Prkce,Pten,Ptp4a3,Ptprm…		Enhancers_Liver_11194,Enhancers_Liver_11196,Enhancers_Liver_14561,Enhancers_Liver_14586,Enhancers_Liver_152,Enhancers_Liver_155,Enhancers_Liver_156,Enhancers_Liver_15729,Enhancers_Liver_15730,Enhancers_Liver_15841,Enhancers_Liver_16226,Enhancers_Liver_16227,Enhancers_Liver_16228,Enhancers_Liver_16229,Enhancers_Liver_16234,Enhancers_Liver_16262,Enhancers_Liver_16282,Enhancers_Liver_16283,Enhancers…
GO:0032872	regulation of stress-activated MAPK cascade	1.73882	143	82.2398	1.05e-07	1.7449	57	32.6667	0.000988	Aida,Aida,App,Axin1,Bmp2,Bmp4,Cdc42,Ceacam10,Dab2,Dab2ip,Dact1,Dlg1,Dusp1,Dusp16,Eda2r,Ephb1,Fgd4,Foxo1,Hgf,Hipk2,Hmgb1,Igbp1,Igf1r,Lmnb1,Map2k1,Map3k1,Map3k5,Map3k7,Map4k4,Mapk1,Mecom,Met,Mid1,Pbk,Pdcd10,Phlpp1,Pja2,Plcb1,Rb1cc1,Rell1,Ripk2,Sash1,Sfrp5,Sh3rf1,Sirpb1c,Stk3,Stk39,Tgfb2,Tnfsf11,Tnik,Tpd52l1,Traf3,Trpv4,Vegfa,Wnt16,Wnt5a,Wnt7b		Enhancers_Liver_152,Enhancers_Liver_155,Enhancers_Liver_156,Enhancers_Liver_18659,Enhancers_Liver_20639,Enhancers_Liver_23747,Enhancers_Liver_24662,Enhancers_Liver_24663,Enhancers_Liver_24664,Enhancers_Liver_26035,Enhancers_Liver_26036,Enhancers_Liver_26040,Enhancers_Liver_26673,Enhancers_Liver_26674,Enhancers_Liver_26709,Enhancers_Liver_26711,Enhancers_Liver_26714,Enhancers_Liver_26715,Enhancers…
GO:0043410	positive regulation of MAPK cascade	1.44188	291	201.819	1.27e-07	1.5842	127	80.1667	1.75e-05	Abl2,Ackr3,Acta2,Adam17,Adra1a,Ajuba,Akap12,Akap13,Alk,Angpt1,Apoe,App,Ar,Arhgap8,Axin1,Bank1,Bcar3,Bmp2,Bmp4,C1qtnf3,Cav2,Cavin3,Ccnq,Cdc42,Cdh2,Cdon,Ceacam10,Cib1,Cxcl17,Dab2,Dab2ip,Ddr2,Dkk1,Dok4,Dok5,Eda2r,Edn1,Epha4,Ern1,Esr1,F2r,Fbxw7,Fgd4,Fgf1,Fgf23,Fgfr2,Flt1,Fshr,Fzd4,Fzd8,Gab1,Garem1,Gata4,Gfral,Gpr55,Hgf,Hipk2,Hmgb1,Igf1,Igf1r,Igf2,Igfbp4,Il1rn,Insr,Iqgap3,Itgb3,Jun,Kdr,Lif,Lmnb1,Map2k…		Enhancers_Liver_11322,Enhancers_Liver_14988,Enhancers_Liver_14991,Enhancers_Liver_152,Enhancers_Liver_15404,Enhancers_Liver_15410,Enhancers_Liver_155,Enhancers_Liver_156,Enhancers_Liver_15729,Enhancers_Liver_15730,Enhancers_Liver_15809,Enhancers_Liver_16181,Enhancers_Liver_16194,Enhancers_Liver_16680,Enhancers_Liver_16686,Enhancers_Liver_16689,Enhancers_Liver_17328,Enhancers_Liver_17418,Enhancers…
GO:0031098	stress-activated protein kinase signaling cascade	1.62826	167	102.563	3.57e-07	1.7284	70	40.5	0.000283	Aida,Aida,App,Axin1,Bmp2,Bmp4,Cdc42,Ceacam10,Dab2,Dab2ip,Dact1,Dlg1,Dusp1,Dusp16,Eda2r,Ephb1,Fgd4,Foxo1,Gfral,Gm28047,Hacd3,Hgf,Hipk2,Hmgb1,Igbp1,Igf1r,Lmnb1,Map2k1,Map2k6,Map3k1,Map3k13,Map3k5,Map3k7,Map4k4,Mapk1,Mapk10,Mecom,Met,Mid1,Nfkb1,Pbk,Pdcd10,Phlpp1,Pja2,Plcb1,Rb1cc1,Rell1,Ripk2,Ror2,Sash1,Sfrp5,Sh3rf1,Sirpb1c,Smad3,Spag9,Stk3,Stk39,Tgfb2,Tnfsf11,Tnik,Tpd52l1,Traf3,Trib1,Trpv4,Usp25,Veg…		Enhancers_Liver_14988,Enhancers_Liver_14991,Enhancers_Liver_152,Enhancers_Liver_155,Enhancers_Liver_156,Enhancers_Liver_16181,Enhancers_Liver_16194,Enhancers_Liver_18659,Enhancers_Liver_19155,Enhancers_Liver_19156,Enhancers_Liver_19157,Enhancers_Liver_19217,Enhancers_Liver_19241,Enhancers_Liver_20639,Enhancers_Liver_22741,Enhancers_Liver_23747,Enhancers_Liver_24662,Enhancers_Liver_24663,Enhancers…
GO:0110148	biomineralization	1.73225	129	74.4695	6.89e-07	1.70909	47	27.5	0.00496	Abcc6,Acvr2a,Ada,Alox5,Ank,Ano6,Bcor,Bmp2,Bmp4,Bmpr1b,Ccdc154,Ccn1,Col1a1,Col1a2,Creb1,Ddr2,Dicer1,Ecm1,Enpp1,Fbln7,Fgf23,Fgfr2,Fgr,Gpc3,Hey1,Hif1a,Igf1,Matn1,Mtss1,Nectin1,Nos3,Phex,Pkdcc,Ppara,Ptn,Rflnb,Rspo2,S1pr1,Slc20a1,Slc4a2,Smad3,Smpd3,Sox9,Stim1,Tent5a,Txlng,Wdr72		Enhancers_Liver_13926,Enhancers_Liver_15090,Enhancers_Liver_16226,Enhancers_Liver_16227,Enhancers_Liver_16228,Enhancers_Liver_16229,Enhancers_Liver_16234,Enhancers_Liver_1626,Enhancers_Liver_16262,Enhancers_Liver_1627,Enhancers_Liver_16282,Enhancers_Liver_16283,Enhancers_Liver_18819,Enhancers_Liver_18820,Enhancers_Liver_20400,Enhancers_Liver_26673,Enhancers_Liver_26674,Enhancers_Liver_26709,Enhan…
GO:0007507	heart development	1.54406	188	121.757	1.36e-06	1.54086	66	42.8333	0.00648	Adra1a,Agtr1b,Akap13,Bcor,Bmp10,Bmp2,Bmp4,Cacna1c,Calcrl,Chd7,Dnah5,Edn1,Enpp1,Foxf1,Foxp1,Gab1,Gata4,Gli2,Gli3,Gm28047,Gm45837,Gm572,Hdac9,Jmjd6,Map2k1,Mapk1,Mef2a,Mib1,Mospd3,Mrtfb,Myl2,Ncoa6,Ndst1,Nfatc1,Nfatc3,Nkx2-5,Nrg1,Nrp1,Nrp2,Pbrm1,Pdlim3,Pkd2,Pou4f1,Psen1,Pskh1,Pten,Ptk7,Rb1cc1,Rps6ka2,Sall4,Shh,Smad2,Sox9,Stra6,Tead1,Tgfb2,Tgfbr1,Tgfbr2,Trp53,Vcam1,Wdr11,Wt1,Xirp2,Zfp36l1,Zfpm1,Zfpm2		Enhancers_Liver_12163,Enhancers_Liver_12164,Enhancers_Liver_13483,Enhancers_Liver_1494,Enhancers_Liver_1516,Enhancers_Liver_1533,Enhancers_Liver_16226,Enhancers_Liver_16227,Enhancers_Liver_16228,Enhancers_Liver_16229,Enhancers_Liver_16234,Enhancers_Liver_16262,Enhancers_Liver_16282,Enhancers_Liver_16283,Enhancers_Liver_16524,Enhancers_Liver_17788,Enhancers_Liver_19155,Enhancers_Liver_19156,Enhanc…
GO:0000165	MAPK cascade	1.31253	402	306.279	2.89e-06	1.46559	181	123.5	1.75e-05	Abl2,Ace2,Ackr3,Acta2,Adam17,Adra1a,Aida,Aida,Ajuba,Akap12,Akap13,Alk,Angpt1,Apoe,App,Ar,Araf,Arhgap8,Axin1,Bank1,Bcar3,Bmp2,Bmp4,C1qtnf3,Cav2,Cavin3,Ccn1,Ccnq,Cdc42,Cdh2,Cdon,Ceacam10,Chrna9,Cib1,Cntnap2,Ctsh,Cxcl17,Dab2,Dab2ip,Dact1,Ddr2,Dkk1,Dlg1,Dok2,Dok4,Dok5,Dusp1,Dusp16,Dusp4,Dusp6,Dusp9,Eda2r,Edn1,Epha4,Ephb1,Ern1,Esr1,F2r,Fbxw7,Fgd4,Fgf1,Fgf23,Fgfr2,Flt1,Foxo1,Fshr,Fzd4,Fzd8,Gab1,Garem1,…		Enhancers_Liver_10228,Enhancers_Liver_10236,Enhancers_Liver_10407,Enhancers_Liver_11322,Enhancers_Liver_14988,Enhancers_Liver_14991,Enhancers_Liver_152,Enhancers_Liver_15404,Enhancers_Liver_15410,Enhancers_Liver_155,Enhancers_Liver_156,Enhancers_Liver_15729,Enhancers_Liver_15730,Enhancers_Liver_15809,Enhancers_Liver_16181,Enhancers_Liver_16194,Enhancers_Liver_16226,Enhancers_Liver_16227,Enhancers…
GO:0031214	biomineral tissue development	1.70307	124	72.8096	3.18e-06	1.64331	43	26.1667	0.0147	Acvr2a,Alox5,Ank,Ano6,Bcor,Bmp2,Bmp4,Bmpr1b,Ccdc154,Ccn1,Col1a1,Col1a2,Ddr2,Dicer1,Ecm1,Enpp1,Fgf23,Fgfr2,Fgr,Gpc3,Hey1,Hif1a,Igf1,Matn1,Mtss1,Nectin1,Nos3,Phex,Pkdcc,Ppara,Ptn,Rflnb,Rspo2,S1pr1,Slc20a1,Slc4a2,Smad3,Smpd3,Sox9,Stim1,Tent5a,Txlng,Wdr72		Enhancers_Liver_13926,Enhancers_Liver_15090,Enhancers_Liver_16226,Enhancers_Liver_16227,Enhancers_Liver_16228,Enhancers_Liver_16229,Enhancers_Liver_16234,Enhancers_Liver_16262,Enhancers_Liver_16282,Enhancers_Liver_16283,Enhancers_Liver_18819,Enhancers_Liver_18820,Enhancers_Liver_20400,Enhancers_Liver_26673,Enhancers_Liver_26674,Enhancers_Liver_26709,Enhancers_Liver_26711,Enhancers_Liver_26714,Enh…
GO:0030282	bone mineralization	1.78475	106	59.392	3.24e-06	1.75221	33	18.8333	0.0177	Acvr2a,Alox5,Ank,Ano6,Bcor,Bmp2,Bmp4,Bmpr1b,Ccdc154,Ccn1,Col1a2,Ddr2,Ecm1,Enpp1,Fgf23,Fgfr2,Fgr,Gpc3,Hif1a,Igf1,Matn1,Mtss1,Phex,Pkdcc,Ptn,Rflnb,Rspo2,S1pr1,Smad3,Smpd3,Sox9,Tent5a,Txlng		Enhancers_Liver_13926,Enhancers_Liver_16226,Enhancers_Liver_16227,Enhancers_Liver_16228,Enhancers_Liver_16229,Enhancers_Liver_16234,Enhancers_Liver_16262,Enhancers_Liver_16282,Enhancers_Liver_16283,Enhancers_Liver_18819,Enhancers_Liver_18820,Enhancers_Liver_26673,Enhancers_Liver_26674,Enhancers_Liver_26709,Enhancers_Liver_26711,Enhancers_Liver_26714,Enhancers_Liver_26715,Enhancers_Liver_26716,Enh…
GO:0043114	regulation of vascular permeability	2.59453	44	16.9587	3.24e-06	2.78049	19	6.83333	0.000976	Abcc8,Abr,Akap12,Angpt1,Arhgap35,Bcr,Cdh5,Ceacam10,Ddah1,Gm45837,Mylk3,Nr3c1,Ocln,Ptp4a3,Tacr1,Tjp1,Tjp2,Trpv4,Vegfa		Enhancers_Liver_13967,Enhancers_Liver_24206,Enhancers_Liver_24209,Enhancers_Liver_24210,Enhancers_Liver_30095,Enhancers_Liver_30108,Enhancers_Liver_30115,Enhancers_Liver_31243,Enhancers_Liver_37801,Enhancers_Liver_37806,Enhancers_Liver_37827,Enhancers_Liver_37845,Enhancers_Liver_37846,Enhancers_Liver_41097,Enhancers_Liver_41111,Enhancers_Liver_41146,Enhancers_Liver_41157,Enhancers_Liver_41170,Enh…
GO:0009888	tissue development	1.29316	419	324.012	6.22e-06	1.55245	185	119.167	6.43e-07	Acvr2a,Ada,Adamts9,Ahr,Akp3,Alox5,Alox8,Angpt1,Ank,Ano6,Asxl1,Atp2c1,Atrn,Axin1,Bcor,Bmp2,Bmp4,Bmpr1b,Ccdc154,Ccn1,Cdc42,Cdh1,Cdon,Ceacam10,Chd7,Col19a1,Col1a1,Col1a2,Creb1,Creb5,Csf1,Csrp2,Ctsb,Dab2,Dact1,Dchs1,Ddr2,Dicer1,Dkk1,Dlg1,Dll1,Ecm1,Edn1,Egflam,Enpp1,Eomes,Ets2,Evpl,Ext1,Eya1,Fbxw8,Fgf1,Fgf23,Fgfr2,Fgr,Flnb,Foxa2,Foxf1,Foxp1,Fzd3,Gab1,Gata4,Gdf11,Gdnf,Ghsr,Gja5,Gli2,Gli3,Gm9774,Gpc3,Gr…		Enhancers_Liver_1013,Enhancers_Liver_10407,Enhancers_Liver_106,Enhancers_Liver_107,Enhancers_Liver_1076,Enhancers_Liver_11185,Enhancers_Liver_112,Enhancers_Liver_11322,Enhancers_Liver_12163,Enhancers_Liver_12164,Enhancers_Liver_12730,Enhancers_Liver_13468,Enhancers_Liver_13483,Enhancers_Liver_13926,Enhancers_Liver_14507,Enhancers_Liver_14561,Enhancers_Liver_14586,Enhancers_Liver_1494,Enhancers_Li…
GO:0030278	regulation of ossification	1.71724	114	66.3857	7.09e-06	1.72131	35	20.3333	0.0177	Acvr2a,Alox5,Ank,Ano6,Bcor,Bmp2,Bmp4,Bmpr1b,Ccn1,Csf1,Ddr2,Dkk1,Ecm1,Enpp1,Fgf23,Hif1a,Kremen1,Mapk1,Matn1,Mkx,P2ry2,Pbx1,Pkdcc,Ptn,Rflnb,S1pr1,Smad3,Smad7,Sox9,Tacr1,Tent5a,Thrb,Txlng,Wnt5a,Zbtb16		Enhancers_Liver_11407,Enhancers_Liver_11424,Enhancers_Liver_13926,Enhancers_Liver_16226,Enhancers_Liver_16227,Enhancers_Liver_16228,Enhancers_Liver_16229,Enhancers_Liver_16234,Enhancers_Liver_16262,Enhancers_Liver_16282,Enhancers_Liver_16283,Enhancers_Liver_18819,Enhancers_Liver_18820,Enhancers_Liver_25306,Enhancers_Liver_25310,Enhancers_Liver_25315,Enhancers_Liver_25403,Enhancers_Liver_26035,Enh…
GO:0043408	regulation of MAPK cascade	1.31119	363	276.848	1.38e-05	1.45778	164	112.5	6.05e-05	Abl2,Ace2,Ackr3,Acta2,Adam17,Adra1a,Aida,Aida,Ajuba,Akap12,Akap13,Alk,Angpt1,Apoe,App,Ar,Arhgap8,Axin1,Bank1,Bcar3,Bmp2,Bmp4,C1qtnf3,Cav2,Cavin3,Ccn1,Ccnq,Cdc42,Cdh2,Cdon,Ceacam10,Chrna9,Cib1,Cxcl17,Dab2,Dab2ip,Dact1,Ddr2,Dkk1,Dlg1,Dok2,Dok4,Dok5,Dusp1,Dusp16,Dusp4,Dusp6,Dusp9,Eda2r,Edn1,Epha4,Ephb1,Ern1,Esr1,F2r,Fbxw7,Fgd4,Fgf1,Fgf23,Fgfr2,Flt1,Foxo1,Fshr,Fzd4,Fzd8,Gab1,Garem1,Gata4,Gfral,Gpr55,…		Enhancers_Liver_10228,Enhancers_Liver_10236,Enhancers_Liver_10407,Enhancers_Liver_11322,Enhancers_Liver_14988,Enhancers_Liver_14991,Enhancers_Liver_152,Enhancers_Liver_15404,Enhancers_Liver_15410,Enhancers_Liver_155,Enhancers_Liver_156,Enhancers_Liver_15729,Enhancers_Liver_15730,Enhancers_Liver_15809,Enhancers_Liver_16181,Enhancers_Liver_16194,Enhancers_Liver_16680,Enhancers_Liver_16686,Enhancers…
GO:0030953	astral microtubule organization	4.56258	18	3.94514	1.56e-05	3.23077	7	2.16667	0.0451	Cep120,Clasp1,Dlg1,Limk2,Pde4dip,Tacc3,Tppp		Enhancers_Liver_11216,Enhancers_Liver_23357,Enhancers_Liver_23360,Enhancers_Liver_23361,Enhancers_Liver_3107,Enhancers_Liver_34251,Enhancers_Liver_41610,Enhancers_Liver_41612,Enhancers_Liver_41613,Enhancers_Liver_41616,Enhancers_Liver_41617,Enhancers_Liver_41618,Enhancers_Liver_41621,Enhancers_Liver_55665,Enhancers_Liver_55672,Enhancers_Liver_55673,Enhancers_Liver_55675,Enhancers_Liver_64310
GO:0060395	SMAD protein signal transduction	1.99165	69	34.6446	1.56e-05	2.0241	28	13.8333	0.00556	Bmp10,Bmp2,Bmp4,Dab2,Gata4,Gdf10,Gdf11,Hipk2,Hnf4a,Inhba,Inhbb,Jade2,Jun,Pbld1,Pparg,Rbpms,Ror2,Smad1,Smad2,Smad3,Smad7,Sptbn1,Stoml1,Tgfb2,Tgfbr1,Trf,Wwtr1,Zmiz1		Enhancers_Liver_11185,Enhancers_Liver_12102,Enhancers_Liver_12127,Enhancers_Liver_12722,Enhancers_Liver_21197,Enhancers_Liver_21238,Enhancers_Liver_22741,Enhancers_Liver_25815,Enhancers_Liver_25817,Enhancers_Liver_25829,Enhancers_Liver_25877,Enhancers_Liver_26416,Enhancers_Liver_26673,Enhancers_Liver_26674,Enhancers_Liver_26709,Enhancers_Liver_26711,Enhancers_Liver_26714,Enhancers_Liver_26715,Enh…
GO:0010595	positive regulation of endothelial cell migration	1.74319	100	57.3659	1.73e-05	1.65517	32	19.3333	0.0409	Adam17,Akt3,Amotl1,Angpt1,Atp5a1,Bcas3,Bmp4,Cib1,Col18a1,Dicer1,Ets1,Fgf1,Foxp1,Hdac9,Hif1a,Hmgb1,Igf1,Igf2,Itgb3,Kdr,Met,Nos3,Nrp1,Pik3cb,Pik3cg,Plk2,Rock2,Sash1,Shh,Vegfa,Vegfc,Wnt5a		Enhancers_Liver_14561,Enhancers_Liver_14586,Enhancers_Liver_152,Enhancers_Liver_155,Enhancers_Liver_156,Enhancers_Liver_15729,Enhancers_Liver_15730,Enhancers_Liver_17328,Enhancers_Liver_17418,Enhancers_Liver_17666,Enhancers_Liver_17667,Enhancers_Liver_17684,Enhancers_Liver_17685,Enhancers_Liver_17688,Enhancers_Liver_17700,Enhancers_Liver_17701,Enhancers_Liver_17704,Enhancers_Liver_17710,Enhancers…
GO:0008610	lipid biosynthetic process	1.37474	257	186.944	3.12e-05	1.31588	134	101.833	0.012	Abca8a,Abcd3,Abhd3,Acaca,Acacb,Acer2,Acsm2,Acsm5,Acss1,Agpat1,Ajuba,Akr1c20,Akr1d1,Aldh1a1,Aldh1a3,Aldh8a1,Alox5,Alox8,Apoe,Asah2,Atg7,Atp1a1,B3galt1,B4galt6,Baat,Bmp2,Bmpr1b,Cbr4,Ccn1,Cds1,Ceacam10,Cers6,Ces1c,Ces1c,Creb1,Crebl2,Crppa,Cyb5r2,Cyp7b1,Dab2,Dctn6,Dgka,Dgki,Dhrs9,Dpm2,Edn1,Efr3b,Egr1,Elovl4,Elovl5,Erlin2,Etnk2,Fabp5,Fdps,Fgf1,Gpat3,Hacd3,Hmgcs2,Hnf4a,Hpgds,Hsd17b11,Hsd17b12,Hsd17b13,…		Enhancers_Liver_1054,Enhancers_Liver_11176,Enhancers_Liver_11182,Enhancers_Liver_13468,Enhancers_Liver_13708,Enhancers_Liver_13715,Enhancers_Liver_14474,Enhancers_Liver_14497,Enhancers_Liver_14519,Enhancers_Liver_16109,Enhancers_Liver_1626,Enhancers_Liver_1627,Enhancers_Liver_16524,Enhancers_Liver_16635,Enhancers_Liver_1692,Enhancers_Liver_16983,Enhancers_Liver_16985,Enhancers_Liver_17301,Enhance…
GO:0051057	positive regulation of small GTPase mediated signal transduction	1.99668	64	32.0532	3.17e-05	2.02817	24	11.8333	0.0117	Abra,Adgrg1,Akap13,Arhgef3,Auts2,Auts2,Cdon,Csf1,Dgki,Erbin,F2r,Gpr55,Gpr65,Igf1,Map2k1,Map4k4,Mapre2,Net1,Notch2,Nrg1,Pik3cb,Pik3cg,Rasgrp4,Sos2		Enhancers_Liver_17666,Enhancers_Liver_17667,Enhancers_Liver_17684,Enhancers_Liver_17685,Enhancers_Liver_17688,Enhancers_Liver_17700,Enhancers_Liver_17701,Enhancers_Liver_17704,Enhancers_Liver_17710,Enhancers_Liver_18495,Enhancers_Liver_19957,Enhancers_Liver_19958,Enhancers_Liver_19959,Enhancers_Liver_20893,Enhancers_Liver_20894,Enhancers_Liver_23911,Enhancers_Liver_2398,Enhancers_Liver_2399,Enhan…
GO:0097709	connective tissue replacement	3.42239	23	6.72044	4.13e-05	3.85714	9	2.33333	0.0048	Clec10a,F2r,Gata4,Hif1a,Klf6,Pparg,Ppp3ca,Rock1,Rock2		Enhancers_Liver_13526,Enhancers_Liver_17328,Enhancers_Liver_18819,Enhancers_Liver_18820,Enhancers_Liver_20939,Enhancers_Liver_20986,Enhancers_Liver_20991,Enhancers_Liver_20997,Enhancers_Liver_20998,Enhancers_Liver_20999,Enhancers_Liver_21004,Enhancers_Liver_21005,Enhancers_Liver_23911,Enhancers_Liver_27402,Enhancers_Liver_40063,Enhancers_Liver_40064,Enhancers_Liver_57128,Enhancers_Liver_57153,Enh…
GO:0072330	monocarboxylic acid biosynthetic process	1.71826	96	55.8705	4.21e-05	1.48454	48	32.3333	0.046	Abcd3,Abhd3,Acaca,Acacb,Acsm2,Acsm5,Acss1,Akr1d1,Aldh1a1,Aldh1a3,Aldh8a1,Alox5,Alox8,Asah2,Baat,Cbr4,Ceacam10,Ces1c,Ces1c,Cyp7b1,Dhrs9,Edn1,Elovl4,Elovl5,Erlin2,Fabp5,Gatm,Hacd3,Hnf4a,Hpgds,Ldha,Lipg,Lpgat1,Malrd1,Mid1ip1,Mlxipl,Pecr,Pla2g10,Pnpla8,Prkaa2,Prkab2,Prkag2,Ptgs1,Qki,Slc45a3,Srr,Star,Stard4		Enhancers_Liver_13468,Enhancers_Liver_13781,Enhancers_Liver_14474,Enhancers_Liver_14497,Enhancers_Liver_1626,Enhancers_Liver_1627,Enhancers_Liver_18124,Enhancers_Liver_18126,Enhancers_Liver_1818,Enhancers_Liver_22151,Enhancers_Liver_22152,Enhancers_Liver_22155,Enhancers_Liver_22165,Enhancers_Liver_33341,Enhancers_Liver_3516,Enhancers_Liver_36580,Enhancers_Liver_40091,Enhancers_Liver_40681,Enhance…
GO:1905603	regulation of blood-brain barrier permeability	4.38663	17	3.87542	4.34e-05	4.5	6	1.33333	0.0141	Abcc8,Angpt1,Ocln,Tjp1,Tjp2,Vegfa		Enhancers_Liver_24206,Enhancers_Liver_24209,Enhancers_Liver_24210,Enhancers_Liver_30095,Enhancers_Liver_30108,Enhancers_Liver_30115,Enhancers_Liver_37801,Enhancers_Liver_37806,Enhancers_Liver_37827,Enhancers_Liver_37845,Enhancers_Liver_37846,Enhancers_Liver_44049,Enhancers_Liver_75247,Enhancers_Liver_75249,Enhancers_Liver_75250,Enhancers_Liver_75587,Enhancers_Liver_75589
GO:0010464	regulation of mesenchymal cell proliferation	1.93616	67	34.6045	4.53e-05	2.19512	15	6.83333	0.0353	Bmp4,Fgfr2,Foxf1,Foxp1,Hmgb1,Irs1,Kdr,Nfib,Ptn,Shh,Six1,Sox9,Tgfbr2,Vegfa,Wnt5a		Enhancers_Liver_152,Enhancers_Liver_155,Enhancers_Liver_156,Enhancers_Liver_16226,Enhancers_Liver_16227,Enhancers_Liver_16228,Enhancers_Liver_16229,Enhancers_Liver_16234,Enhancers_Liver_16262,Enhancers_Liver_16282,Enhancers_Liver_16283,Enhancers_Liver_18755,Enhancers_Liver_2189,Enhancers_Liver_2194,Enhancers_Liver_2200,Enhancers_Liver_2214,Enhancers_Liver_2220,Enhancers_Liver_2233,Enhancers_Liver…
GO:0046579	positive regulation of Ras protein signal transduction	1.98851	60	30.1734	7.1e-05	2.0625	22	10.6667	0.014	Abra,Adgrg1,Akap13,Arhgef3,Auts2,Auts2,Csf1,Dgki,Erbin,F2r,Gpr55,Gpr65,Igf1,Map2k1,Map4k4,Mapre2,Net1,Notch2,Nrg1,Pik3cb,Pik3cg,Rasgrp4		Enhancers_Liver_17666,Enhancers_Liver_17667,Enhancers_Liver_17684,Enhancers_Liver_17685,Enhancers_Liver_17688,Enhancers_Liver_17700,Enhancers_Liver_17701,Enhancers_Liver_17704,Enhancers_Liver_17710,Enhancers_Liver_19957,Enhancers_Liver_19958,Enhancers_Liver_19959,Enhancers_Liver_20893,Enhancers_Liver_20894,Enhancers_Liver_23911,Enhancers_Liver_2398,Enhancers_Liver_2399,Enhancers_Liver_2400,Enhanc…
GO:0001503	ossification	1.48818	158	106.17	7.4e-05	1.58744	59	37.1667	0.00611	Acvr2a,Alox5,Ank,Ano6,Bcor,Bmp2,Bmp4,Bmpr1b,Cbfb,Ccn1,Col1a1,Csf1,Dchs1,Ddr2,Dhx36,Dkk1,Ecm1,Enpp1,Ext1,Ext2,Fgf23,Gdf10,Hif1a,Igf2,Kremen1,Lrrc17,Mapk1,Matn1,Mef2d,Mesd,Mkx,Mmp14,Mmp16,Mn1,Nppc,Npr2,P2ry2,Pbx1,Pkdcc,Ppargc1b,Ptn,Rflnb,S1pr1,Sema4d,Slc26a2,Smad3,Smad7,Smpd3,Sox9,Suco,Tacr1,Tapt1,Tent5a,Thrb,Tnfsf11,Twsg1,Txlng,Wnt5a,Zbtb16		Enhancers_Liver_11407,Enhancers_Liver_11424,Enhancers_Liver_13926,Enhancers_Liver_15090,Enhancers_Liver_16226,Enhancers_Liver_16227,Enhancers_Liver_16228,Enhancers_Liver_16229,Enhancers_Liver_16234,Enhancers_Liver_16262,Enhancers_Liver_16282,Enhancers_Liver_16283,Enhancers_Liver_18819,Enhancers_Liver_18820,Enhancers_Liver_22622,Enhancers_Liver_22631,Enhancers_Liver_2439,Enhancers_Liver_25306,Enha…
GO:1905203	regulation of connective tissue replacement	3.57734	19	5.31121	0.00014	4.5	6	1.33333	0.0141	Gata4,Klf6,Pparg,Ppp3ca,Rock1,Rock2		Enhancers_Liver_17328,Enhancers_Liver_20939,Enhancers_Liver_20986,Enhancers_Liver_20991,Enhancers_Liver_20997,Enhancers_Liver_20998,Enhancers_Liver_20999,Enhancers_Liver_21004,Enhancers_Liver_21005,Enhancers_Liver_27402,Enhancers_Liver_40063,Enhancers_Liver_40064,Enhancers_Liver_57128,Enhancers_Liver_57153,Enhancers_Liver_57154,Enhancers_Liver_57163,Enhancers_Liver_72532,Enhancers_Liver_72533,Enh…
GO:0046467	membrane lipid biosynthetic process	1.86717	65	34.8121	0.000144	1.62712	32	19.6667	0.0496	Abca8a,Acer2,Asah2,Atg7,B3galt1,B4galt6,Ccn1,Cers6,Dpm2,Elovl4,Elovl5,Hacd3,Kdsr,Ormdl2,Osbp,P2rx1,Pigc,Pigu,Pigw,Prkcd,Sgms1,Smpd3,Sptlc1,Sptlc2,St3gal3,St3gal4,St6galnac1,St6galnac3,St6galnac4,St6galnac5,St8sia2,Ugcg		Enhancers_Liver_11182,Enhancers_Liver_13708,Enhancers_Liver_13715,Enhancers_Liver_14519,Enhancers_Liver_16109,Enhancers_Liver_16524,Enhancers_Liver_19815,Enhancers_Liver_22741,Enhancers_Liver_26125,Enhancers_Liver_3054,Enhancers_Liver_40431,Enhancers_Liver_43629,Enhancers_Liver_44425,Enhancers_Liver_44440,Enhancers_Liver_4669,Enhancers_Liver_4674,Enhancers_Liver_4679,Enhancers_Liver_4689,Enhancer…
GO:0042752	regulation of circadian rhythm	1.74199	80	45.9244	0.000148	1.8	36	20	0.0083	Ada,Adrb1,Arntl,Atg7,Btrc,Cdk1,Chrnb2,Cipc,Creb1,Cry1,Csnk1d,Fbxl17,Fbxl21,Fbxw11,Fbxw7,Gsk3b,Hnf4a,Mapk10,Mtnr1b,Npas2,Nr1d2,Phlpp1,Pmch,Ppara,Pparg,Ppargc1a,Ppp1cb,Prkaa2,Rock2,Rora,Siah2,Thrap3,Trp53,Usp2,Usp9x,Zfhx3		Enhancers_Liver_12258,Enhancers_Liver_12264,Enhancers_Liver_12271,Enhancers_Liver_12274,Enhancers_Liver_13483,Enhancers_Liver_1626,Enhancers_Liver_1627,Enhancers_Liver_16892,Enhancers_Liver_16893,Enhancers_Liver_17328,Enhancers_Liver_19799,Enhancers_Liver_22890,Enhancers_Liver_25403,Enhancers_Liver_3054,Enhancers_Liver_32141,Enhancers_Liver_34724,Enhancers_Liver_38299,Enhancers_Liver_38312,Enhanc…
GO:0043116	negative regulation of vascular permeability	2.72684	28	10.2683	0.000148	2.84211	9	3.16667	0.0373	Abcc8,Akap12,Angpt1,Arhgap35,Ceacam10,Ddah1,Gm45837,Nr3c1,Vegfa		Enhancers_Liver_30095,Enhancers_Liver_30108,Enhancers_Liver_30115,Enhancers_Liver_37801,Enhancers_Liver_37806,Enhancers_Liver_37827,Enhancers_Liver_37845,Enhancers_Liver_37846,Enhancers_Liver_41097,Enhancers_Liver_41111,Enhancers_Liver_41146,Enhancers_Liver_41157,Enhancers_Liver_41170,Enhancers_Liver_41173,Enhancers_Liver_41176,Enhancers_Liver_57403,Enhancers_Liver_57405,Enhancers_Liver_57423,Enh…
GO:0030148	sphingolipid biosynthetic process	1.95266	57	29.191	0.000162	1.92857	27	14	0.0123	Abca8a,Acer2,Asah2,Atg7,B3galt1,B4galt6,Ccn1,Cers6,Elovl4,Elovl5,Hacd3,Kdsr,Ormdl2,Osbp,P2rx1,Prkcd,Sgms1,Smpd3,Sptlc1,Sptlc2,St3gal3,St6galnac1,St6galnac3,St6galnac4,St6galnac5,St8sia2,Ugcg		Enhancers_Liver_11182,Enhancers_Liver_13708,Enhancers_Liver_13715,Enhancers_Liver_16109,Enhancers_Liver_16524,Enhancers_Liver_19815,Enhancers_Liver_22741,Enhancers_Liver_26125,Enhancers_Liver_3054,Enhancers_Liver_40431,Enhancers_Liver_43629,Enhancers_Liver_44425,Enhancers_Liver_44440,Enhancers_Liver_47415,Enhancers_Liver_48671,Enhancers_Liver_48705,Enhancers_Liver_48708,Enhancers_Liver_48714,Enha…
GO:0031643	positive regulation of myelination	2.76042	27	9.78113	0.000173	3	11	3.66667	0.0117	Cst7,Dicer1,Hgf,Igf1,Myrf,Nrg1,Pard3,Rnf10,S100b,Tppp,Trf		Enhancers_Liver_20400,Enhancers_Liver_23357,Enhancers_Liver_23360,Enhancers_Liver_23361,Enhancers_Liver_43555,Enhancers_Liver_51618,Enhancers_Liver_51619,Enhancers_Liver_51620,Enhancers_Liver_63723,Enhancers_Liver_67048,Enhancers_Liver_80008,Enhancers_Liver_80012,Enhancers_Liver_80018,Enhancers_Liver_80019,Enhancers_Liver_83875,Enhancers_Liver_83884,Enhancers_Liver_83896,Enhancers_Liver_83905,Enh…
GO:0031532	actin cytoskeleton reorganization	1.75352	78	44.4819	0.000196	1.98	33	16.6667	0.00315	Asb2,Atp2c1,Auts2,Auts2,Baiap2l1,Bcas3,Cdc42,Cdc42bpa,Cdc42bpg,Cdh1,Dtnbp1,Eps8,Gab1,Gpr65,Iqgap2,Lpin1,Myh9,Notch2,Nrp1,Parva,Parvb,Parvg,Phactr1,Ptk7,Rala,Rictor,S1pr1,Sema3e,Sipa1l1,Sptan1,Tjp1,Tnik,Trpv4		Enhancers_Liver_14561,Enhancers_Liver_14586,Enhancers_Liver_17301,Enhancers_Liver_19422,Enhancers_Liver_19432,Enhancers_Liver_19446,Enhancers_Liver_19449,Enhancers_Liver_19450,Enhancers_Liver_19452,Enhancers_Liver_19957,Enhancers_Liver_19958,Enhancers_Liver_19959,Enhancers_Liver_20285,Enhancers_Liver_21254,Enhancers_Liver_22151,Enhancers_Liver_22152,Enhancers_Liver_22155,Enhancers_Liver_22165,Enh…
GO:0002064	epithelial cell development	1.57086	111	70.6618	0.000229	1.6875	45	26.6667	0.00786	Afdn,Akap11,Arid4a,Arntl,Asxl1,Bfsp1,Bmp4,Cdh1,Cdh2,Cdh5,Dicer1,Dll1,Dmrt1,Ednrb,Esr1,Fgfr2,Flnb,Fosl2,Fshr,Gm45837,Gm9774,Hnf4a,Il6st,Klf5,Map7,Marveld2,Myo1e,Onecut1,Onecut2,Palld,Pecam1,Plcb1,Rap1a,Rarb,Rheb,Rock1,Rock2,Sidt2,Sox9,Tjp1,Tjp2,Vegfa,Vezf1,Wnt5a,Wt1		Enhancers_Liver_14766,Enhancers_Liver_14784,Enhancers_Liver_15841,Enhancers_Liver_16226,Enhancers_Liver_16227,Enhancers_Liver_16228,Enhancers_Liver_16229,Enhancers_Liver_16234,Enhancers_Liver_16262,Enhancers_Liver_16282,Enhancers_Liver_16283,Enhancers_Liver_17328,Enhancers_Liver_18615,Enhancers_Liver_20400,Enhancers_Liver_24209,Enhancers_Liver_24210,Enhancers_Liver_24702,Enhancers_Liver_24972,Enh…
GO:1902533	positive regulation of intracellular signal transduction	1.24009	407	328.203	0.000263	1.29425	195	150.667	0.00307	Abl2,Abra,Ackr3,Acta2,Actn4,Ada,Adam17,Adgrg1,Adora3,Adra1a,Ajuba,Akap12,Akap13,Akt3,Alk,Alpk1,Angpt1,Apoe,App,Ar,Arhgap8,Arhgef3,Auts2,Auts2,Axin1,Bank1,Bcar3,Bcl10,Bmp2,Bmp4,C1qtnf3,Cav2,Cavin3,Ccnq,Cd8a,Cdc42,Cdh2,Cdon,Ceacam10,Cib1,Clu,Csf1,Cxcl17,Dab2,Dab2ip,Ddr2,Ddx3x,Dgki,Dhx36,Dkk1,Dlg5,Dok4,Dok5,Eda2r,Edn1,Epha4,Erbin,Ern1,Esr1,F2r,Fbh1,Fbxw7,Fgd4,Fgf1,Fgf23,Fgfr2,Fgr,Flt1,Fshr,Fzd4,Fzd8…		Enhancers_Liver_11322,Enhancers_Liver_13483,Enhancers_Liver_13797,Enhancers_Liver_14988,Enhancers_Liver_14991,Enhancers_Liver_15143,Enhancers_Liver_15156,Enhancers_Liver_152,Enhancers_Liver_15404,Enhancers_Liver_15410,Enhancers_Liver_155,Enhancers_Liver_156,Enhancers_Liver_15729,Enhancers_Liver_15730,Enhancers_Liver_15809,Enhancers_Liver_16181,Enhancers_Liver_16194,Enhancers_Liver_16226,Enhancers…
GO:0006665	sphingolipid metabolic process	1.76294	72	40.8409	0.000305	1.64885	36	21.8333	0.0287	Abca8a,Acer2,Asah2,Atg7,B3galt1,B4galt6,Ccn1,Cerk,Cers6,Cert1,Cln8,Elovl4,Elovl5,Gba2,Gm2a,Hacd3,Itgb8,Kdsr,Map7,Ormdl2,Osbp,P2rx1,Plpp1,Prkcd,Serinc3,Sgms1,Smpd3,Sptlc1,Sptlc2,St3gal3,St6galnac1,St6galnac3,St6galnac4,St6galnac5,St8sia2,Ugcg		Enhancers_Liver_11182,Enhancers_Liver_12873,Enhancers_Liver_13708,Enhancers_Liver_13715,Enhancers_Liver_16109,Enhancers_Liver_16524,Enhancers_Liver_19815,Enhancers_Liver_20851,Enhancers_Liver_20860,Enhancers_Liver_20866,Enhancers_Liver_22741,Enhancers_Liver_23991,Enhancers_Liver_24774,Enhancers_Liver_26125,Enhancers_Liver_3054,Enhancers_Liver_32164,Enhancers_Liver_40431,Enhancers_Liver_43629,Enha…
GO:0010594	regulation of endothelial cell migration	1.49755	133	88.812	0.000319	1.5	45	30	0.0486	Adam17,Adamts9,Adgrb1,Akt3,Amotl1,Angpt1,Apoe,Atp5a1,Bcas3,Bmp10,Bmp4,Ceacam10,Cib1,Col18a1,Dab2ip,Dicer1,Emp2,Ets1,Fbxw7,Fgf1,Foxp1,Glul,Hdac9,Hif1a,Hmgb1,Igf1,Igf2,Itgb3,Kdr,Meox2,Met,Nos3,Nrp1,Pdcd10,Pik3cb,Pik3cg,Plk2,Pparg,Ptprm,Rock2,Sash1,Shh,Vegfa,Vegfc,Wnt5a		Enhancers_Liver_14561,Enhancers_Liver_14586,Enhancers_Liver_152,Enhancers_Liver_155,Enhancers_Liver_156,Enhancers_Liver_15729,Enhancers_Liver_15730,Enhancers_Liver_17328,Enhancers_Liver_17418,Enhancers_Liver_17666,Enhancers_Liver_17667,Enhancers_Liver_17684,Enhancers_Liver_17685,Enhancers_Liver_17688,Enhancers_Liver_17700,Enhancers_Liver_17701,Enhancers_Liver_17704,Enhancers_Liver_17710,Enhancers…
GO:0090630	activation of GTPase activity	1.78971	67	37.4362	0.000366	1.81818	30	16.5	0.0164	Abr,Arhgap24,Arhgap25,Arhgap29,Arhgef26,Bcas3,Bcr,Coro1c,Dock7,Garnl3,Gpr65,Mtss2,Ngef,Ralgapa2,Rangap1,Rap1gap2,Rcc2,Scrib,Sipa1l1,Sipa1l3,Tbc1d1,Tbc1d10a,Tbc1d2,Tbc1d22a,Tbc1d25,Tbc1d5,Tbc1d8,Tsc1,Usp6nl,Wnt5a		Enhancers_Liver_11290,Enhancers_Liver_13747,Enhancers_Liver_13967,Enhancers_Liver_14561,Enhancers_Liver_14586,Enhancers_Liver_19422,Enhancers_Liver_19432,Enhancers_Liver_19446,Enhancers_Liver_19449,Enhancers_Liver_19450,Enhancers_Liver_19452,Enhancers_Liver_19957,Enhancers_Liver_19958,Enhancers_Liver_19959,Enhancers_Liver_2488,Enhancers_Liver_26035,Enhancers_Liver_26036,Enhancers_Liver_26040,Enha…
GO:0014741	negative regulation of muscle hypertrophy	2.39	32	13.3891	0.000403	2.32258	12	5.16667	0.0497	Bmp10,Ctdp1,Fbxo32,Foxo1,Foxp1,Gsk3b,Igfbp5,Jarid2,Ppara,Pparg,Smad3,Tomm70a		Enhancers_Liver_1856,Enhancers_Liver_22299,Enhancers_Liver_22341,Enhancers_Liver_30542,Enhancers_Liver_32141,Enhancers_Liver_34724,Enhancers_Liver_35231,Enhancers_Liver_42897,Enhancers_Liver_54233,Enhancers_Liver_54246,Enhancers_Liver_54247,Enhancers_Liver_54248,Enhancers_Liver_71376,Enhancers_Liver_71951,Enhancers_Liver_71952,Enhancers_Liver_71953,Enhancers_Liver_71971,Enhancers_Liver_71982,Enha…
GO:0050918	positive chemotaxis	1.97526	50	25.3131	0.000427	2.08696	16	7.66667	0.0426	Angpt1,Artn,Hmgb1,Il16,Itga2,Kdr,Met,Nrp1,Pgf,S1pr1,Scrib,Smad3,Vegfa,Vegfc,Wnt5a,Wnt7b		Enhancers_Liver_152,Enhancers_Liver_155,Enhancers_Liver_156,Enhancers_Liver_19634,Enhancers_Liver_24877,Enhancers_Liver_24880,Enhancers_Liver_26035,Enhancers_Liver_26036,Enhancers_Liver_26040,Enhancers_Liver_30095,Enhancers_Liver_30108,Enhancers_Liver_30115,Enhancers_Liver_32096,Enhancers_Liver_32097,Enhancers_Liver_37801,Enhancers_Liver_37806,Enhancers_Liver_37827,Enhancers_Liver_37845,Enhancers…
GO:0043500	muscle adaptation	1.69441	78	46.0336	0.000451	1.70642	31	18.1667	0.0309	Adra1a,Adrb1,Ar,Asb2,Bmp10,Ctdp1,Edn1,Fbxo32,Fdps,Foxo1,Foxp1,Gata4,Gatm,Gsk3b,Igf1,Igfbp5,Jarid2,Kdm4a,Mef2a,Nfatc1,Nfatc3,Nos3,Nr3c1,Ppara,Pparg,Ppp3ca,Rock1,Rock2,Smad3,Tead1,Tomm70a		Enhancers_Liver_17328,Enhancers_Liver_1856,Enhancers_Liver_20285,Enhancers_Liver_22151,Enhancers_Liver_22152,Enhancers_Liver_22155,Enhancers_Liver_22165,Enhancers_Liver_22299,Enhancers_Liver_22341,Enhancers_Liver_23747,Enhancers_Liver_27402,Enhancers_Liver_27668,Enhancers_Liver_27672,Enhancers_Liver_27681,Enhancers_Liver_30542,Enhancers_Liver_32141,Enhancers_Liver_34724,Enhancers_Liver_35231,Enha…
GO:0048844	artery morphogenesis	1.76026	68	38.6308	0.000467	2.09091	23	11	0.0102	Adamts9,Akt3,Angptl3,Apoe,Arid2,Bmp4,Chd7,Edn1,Eya1,Foxf1,Gja5,Hey1,Kat6a,Ldlr,Nrp1,Six1,Smad7,Stra6,Tbx2,Tgfb2,Tgfbr1,Vegfa,Zmiz1		Enhancers_Liver_14561,Enhancers_Liver_14586,Enhancers_Liver_175,Enhancers_Liver_18755,Enhancers_Liver_22151,Enhancers_Liver_22152,Enhancers_Liver_22155,Enhancers_Liver_22165,Enhancers_Liver_25815,Enhancers_Liver_25817,Enhancers_Liver_25829,Enhancers_Liver_25877,Enhancers_Liver_26673,Enhancers_Liver_26674,Enhancers_Liver_26709,Enhancers_Liver_26711,Enhancers_Liver_26714,Enhancers_Liver_26715,Enhan…
GO:0033002	muscle cell proliferation	1.39601	177	126.79	0.000469	1.68293	69	41	0.000672	Ace2,Agtr1b,Angpt1,Apln,Apoe,Arid2,Bmp10,Bmp2,Bmp4,Calcrl,Cav2,Ccnd2,Cdk1,Ddr2,Edn1,Egr1,Enpp1,Ephb1,Ern1,Esr1,Fgf1,Fgfr2,Flt1,Foxp1,Gata4,Gsk3b,Hgf,Hif1a,Igf1,Igf1r,Igfbp5,Il15,Itga2,Itgb3,Jarid2,Jun,Mapk1,Mef2d,Meis1,Nampt,Nkx2-5,Nos3,Nrg1,P2ry6,Pparg,Ppargc1a,Prkg1,Pten,Ralbp1,S1pr1,Shh,Six1,Smad1,Smpd3,Tacr1,Tafa5,Tbx2,Tgfb2,Tgfbr1,Tgfbr2,Tgfbr3,Tnfaip3,Tpm1,Trib1,Trp53,Vegfa,Vgll4,Zfp143,Zfp…		Enhancers_Liver_11714,Enhancers_Liver_12163,Enhancers_Liver_12164,Enhancers_Liver_13483,Enhancers_Liver_14561,Enhancers_Liver_14586,Enhancers_Liver_15729,Enhancers_Liver_15730,Enhancers_Liver_15809,Enhancers_Liver_17684,Enhancers_Liver_17685,Enhancers_Liver_17688,Enhancers_Liver_17700,Enhancers_Liver_17701,Enhancers_Liver_17704,Enhancers_Liver_17710,Enhancers_Liver_17723,Enhancers_Liver_1856,Enha…
GO:2000147	positive regulation of cell motility	1.28068	298	232.689	0.000485	1.37173	131	95.5	0.00353	Abcc1,Abl2,Ackr3,Acta2,Actn4,Adam17,Adora3,Akap12,Akt3,Amotl1,Angpt1,Angptl3,Ano6,App,Arf6,Atp5a1,Bcas3,Bmp2,Bmp4,Ccn1,Cdh5,Cfap20,Cib1,Clasp1,Col18a1,Col1a1,Creb3,Csf1,Ctsh,Cxcl17,Dab2,Dab2ip,Ddr2,Dicer1,Dock5,Dock7,Edn1,Egr1,Elp3,Epha4,Ets1,F2r,Fermt1,Fgf1,Fgr,Flt1,Foxf1,Foxp1,Fzd4,Gab1,Grb7,Has2,Hdac6,Hdac9,Hgf,Hif1a,Hmgb1,Igf1,Igf1r,Igf2,Igfbp5,Il6st,Insr,Irs1,Itga2,Itgb3,Jun,Kdr,Lamc2,Map2k1…		Enhancers_Liver_10347,Enhancers_Liver_10363,Enhancers_Liver_106,Enhancers_Liver_107,Enhancers_Liver_11084,Enhancers_Liver_112,Enhancers_Liver_13483,Enhancers_Liver_14024,Enhancers_Liver_14561,Enhancers_Liver_14586,Enhancers_Liver_14988,Enhancers_Liver_14991,Enhancers_Liver_15090,Enhancers_Liver_152,Enhancers_Liver_15350,Enhancers_Liver_155,Enhancers_Liver_156,Enhancers_Liver_15729,Enhancers_Liver…
GO:0002092	positive regulation of receptor internalization	2.15003	39	18.1393	0.000485	2.29412	13	5.66667	0.0422	Angpt1,Apln,App,Cd63,Dab2,Dtnbp1,Fmr1,Insr,Pard3,Scyl2,Syk,Tbc1d5,Vegfa		Enhancers_Liver_11194,Enhancers_Liver_11196,Enhancers_Liver_22341,Enhancers_Liver_22708,Enhancers_Liver_29041,Enhancers_Liver_30095,Enhancers_Liver_30108,Enhancers_Liver_30115,Enhancers_Liver_35619,Enhancers_Liver_35627,Enhancers_Liver_35628,Enhancers_Liver_35635,Enhancers_Liver_37801,Enhancers_Liver_37806,Enhancers_Liver_37827,Enhancers_Liver_37845,Enhancers_Liver_37846,Enhancers_Liver_38097,Enh…
GO:0007266	Rho protein signal transduction	1.65621	81	48.9069	0.00055	1.74803	37	21.1667	0.0117	Abca1,Abl2,Abra,Adgrg1,Adra1a,Adrb1,Agtr1b,Akap13,Apoe,Arap3,Arhgap35,Arhgef18,Arhgef3,Bcr,Cdc42,Cdc42ep3,Cdc42se2,Cdh2,Celsr1,Col1a2,Dlc1,Eps8,F2r,Gpr55,Gpr65,Hacd3,Kank1,Met,Net1,Nrp1,Ophn1,Pecam1,Ralbp1,Rock1,Rock2,Shtn1,Tnfaip1		Enhancers_Liver_12842,Enhancers_Liver_14156,Enhancers_Liver_15841,Enhancers_Liver_17328,Enhancers_Liver_19957,Enhancers_Liver_19958,Enhancers_Liver_19959,Enhancers_Liver_20893,Enhancers_Liver_20894,Enhancers_Liver_23911,Enhancers_Liver_2398,Enhancers_Liver_2399,Enhancers_Liver_2400,Enhancers_Liver_25967,Enhancers_Liver_27668,Enhancers_Liver_27672,Enhancers_Liver_27681,Enhancers_Liver_30084,Enhanc…
GO:0048534	hematopoietic or lymphoid organ development	1.30379	259	198.652	0.000555	1.39925	125	89.3333	0.00256	Acvr2a,Ada,Adam17,Adar,Ahctf1,Ahr,Angpt1,Arid1b,Arid2,Asxl1,Atg7,Atp11c,Bcr,Bmp4,Brd1,Cbfb,Ccnb2,Cd34,Cdk13,Cdkn2b,Ceacam10,Cib1,Creb1,Csf1,Csf3r,Dcstamp,Dicer1,Dll1,Drosha,Egr3,Epas1,Ephb3,Ets1,Fbxo7,Fbxw7,Foxp1,Fshr,Gabpa,Gli3,Gm9774,Gpr55,Gsk3b,Hif1a,Hmgb1,Hspa9,Ikzf3,Il15,Inhba,Inpp4b,Irf1,Itgb3,Jarid2,Jun,Kat6a,Kdr,Kirrel3,Klf13,Lif,Lmo2,Lmo4,Lrrc17,Map2k1,Mapk1,Meis1,Mmp14,Myo1e,Nckap1l,Nfa…		Enhancers_Liver_1013,Enhancers_Liver_1076,Enhancers_Liver_11322,Enhancers_Liver_11714,Enhancers_Liver_12163,Enhancers_Liver_12164,Enhancers_Liver_12798,Enhancers_Liver_13483,Enhancers_Liver_13839,Enhancers_Liver_152,Enhancers_Liver_15350,Enhancers_Liver_155,Enhancers_Liver_156,Enhancers_Liver_15729,Enhancers_Liver_15730,Enhancers_Liver_1626,Enhancers_Liver_1627,Enhancers_Liver_16592,Enhancers_Liv…
GO:0043547	positive regulation of GTPase activity	1.46005	137	93.8325	0.000574	1.70732	70	41	0.000383	Abr,Adrb1,Afdn,Arap2,Arap3,Arhgap24,Arhgap25,Arhgap29,Arhgap35,Arhgap6,Arhgef26,Asap1,Asap2,Bcar3,Bcas3,Bcr,C9orf72,Cav2,Chn2,Coro1c,Dennd1b,Dock7,F2r,Garnl3,Gnao1,Gnb5,Gpr65,Gsk3b,Map2k1,Map4k4,Mapre2,Mtss2,Net1,Ngef,Pkp4,Prex1,Ralbp1,Ralgapa2,Ralgps1,Rangap1,Rap1a,Rap1gap2,Rapgef6,Rasgrp4,Rcc2,Rgma,Rgp1,Rgs16,Rgs6,Rgs8,S100a10,S1pr1,Scrib,Sema4d,Sipa1l1,Sipa1l3,Snx13,Snx9,Sos2,Tbc1d1,Tbc1d10a,T…		Enhancers_Liver_11290,Enhancers_Liver_12842,Enhancers_Liver_13747,Enhancers_Liver_13967,Enhancers_Liver_14561,Enhancers_Liver_14586,Enhancers_Liver_1472,Enhancers_Liver_1473,Enhancers_Liver_1474,Enhancers_Liver_1475,Enhancers_Liver_17399,Enhancers_Liver_17408,Enhancers_Liver_17788,Enhancers_Liver_17835,Enhancers_Liver_18495,Enhancers_Liver_19422,Enhancers_Liver_19432,Enhancers_Liver_19446,Enhance…
GO:1905205	positive regulation of connective tissue replacement	3.74415	15	4.00625	0.000577	6	4	0.666667	0.0209	Klf6,Ppp3ca,Rock1,Rock2		Enhancers_Liver_17328,Enhancers_Liver_20939,Enhancers_Liver_20986,Enhancers_Liver_20991,Enhancers_Liver_20997,Enhancers_Liver_20998,Enhancers_Liver_20999,Enhancers_Liver_21004,Enhancers_Liver_21005,Enhancers_Liver_40063,Enhancers_Liver_40064,Enhancers_Liver_57128,Enhancers_Liver_57153,Enhancers_Liver_57154,Enhancers_Liver_57163
GO:0061036	positive regulation of cartilage development	2.08601	41	19.6548	0.00058	3.42857	16	4.66667	0.000283	Bmp10,Bmp2,Bmp4,Ccn1,Gli3,Loxl2,Mustn1,Pkdcc,Smad1,Smad3,Smad7,Sox6,Sox9,Thrb,Wnt5a,Zbtb16		Enhancers_Liver_16226,Enhancers_Liver_16227,Enhancers_Liver_16228,Enhancers_Liver_16229,Enhancers_Liver_16234,Enhancers_Liver_16262,Enhancers_Liver_16282,Enhancers_Liver_16283,Enhancers_Liver_21197,Enhancers_Liver_25306,Enhancers_Liver_25310,Enhancers_Liver_25315,Enhancers_Liver_25403,Enhancers_Liver_26035,Enhancers_Liver_26036,Enhancers_Liver_26040,Enhancers_Liver_26157,Enhancers_Liver_26673,Enh…
GO:0035023	regulation of Rho protein signal transduction	1.79481	62	34.544	0.000637	1.90244	26	13.6667	0.0171	Abca1,Abl2,Abra,Adgrg1,Adra1a,Akap13,Apoe,Arap3,Arhgap35,Arhgef18,Arhgef3,Bcr,Cdc42se2,Cdh2,Dlc1,Eps8,F2r,Gpr55,Gpr65,Kank1,Met,Net1,Nrp1,Ophn1,Ralbp1,Tnfaip1		Enhancers_Liver_12842,Enhancers_Liver_14156,Enhancers_Liver_19957,Enhancers_Liver_19958,Enhancers_Liver_19959,Enhancers_Liver_20893,Enhancers_Liver_20894,Enhancers_Liver_23911,Enhancers_Liver_2398,Enhancers_Liver_2399,Enhancers_Liver_2400,Enhancers_Liver_25967,Enhancers_Liver_27668,Enhancers_Liver_27672,Enhancers_Liver_27681,Enhancers_Liver_30084,Enhancers_Liver_30095,Enhancers_Liver_30108,Enhanc…
GO:0040017	positive regulation of locomotion	1.27111	305	239.948	0.000665	1.35484	133	98.1667	0.00494	Abcc1,Abl2,Ackr3,Acta2,Actn4,Adam17,Adora3,Akap12,Akt3,Amotl1,Angpt1,Angptl3,Ano6,App,Arf6,Artn,Atp5a1,Bcas3,Bmp2,Bmp4,Ccn1,Cdh5,Cfap20,Cib1,Clasp1,Col18a1,Col1a1,Creb3,Csf1,Ctsh,Cxcl17,Dab2,Dab2ip,Ddr2,Dicer1,Dock5,Dock7,Edn1,Egr1,Elp3,Epha4,Ets1,F2r,Fermt1,Fgf1,Fgr,Flt1,Foxf1,Foxp1,Fzd4,Gab1,Grb7,Has2,Hdac6,Hdac9,Hgf,Hif1a,Hmgb1,Igf1,Igf1r,Igf2,Igfbp5,Il16,Il6st,Insr,Irs1,Itga2,Itgb3,Jun,Kdr,La…		Enhancers_Liver_10347,Enhancers_Liver_10363,Enhancers_Liver_106,Enhancers_Liver_107,Enhancers_Liver_11084,Enhancers_Liver_112,Enhancers_Liver_13483,Enhancers_Liver_14024,Enhancers_Liver_14561,Enhancers_Liver_14586,Enhancers_Liver_14988,Enhancers_Liver_14991,Enhancers_Liver_15090,Enhancers_Liver_152,Enhancers_Liver_15350,Enhancers_Liver_155,Enhancers_Liver_156,Enhancers_Liver_15729,Enhancers_Liver…
GO:0006897	endocytosis	1.33484	212	158.82	0.000811	1.35193	105	77.6667	0.0163	Aak1,Ackr3,Actn4,Angpt1,Ankrd13d,Ano6,Anxa2,Apln,Apoe,App,Appl2,Arf6,Arhgap21,Asgr2,Atxn2,Bicd1,C9orf72,Cacng7,Cacng8,Calcrl,Calm1,Cav2,Cd63,Cd9,Cdc42,Ceacam10,Clec9a,Clu,Dab2,Dennd1b,Dkk1,Dll1,Dnm3,Dpysl2,Dtnbp1,Eea1,Ehd1,Ehd3,Enthd1,Eps15,Fcho2,Fchsd2,Fmr1,Gapvd1,Gpc3,Insr,Itga2,Itgb3,Ldlr,Lgals3bp,Lmbrd1,Lrp12,Lrp1b,Lrrtm2,Mapk1,Marchf3,Mctp1,Mib1,Mtmr2,Myo1e,Nckap1l,Nckipsd,Necap2,Neurl1b,Nos…		Enhancers_Liver_10055,Enhancers_Liver_10064,Enhancers_Liver_10072,Enhancers_Liver_10078,Enhancers_Liver_10079,Enhancers_Liver_10080,Enhancers_Liver_10082,Enhancers_Liver_10347,Enhancers_Liver_10363,Enhancers_Liver_11194,Enhancers_Liver_11196,Enhancers_Liver_13526,Enhancers_Liver_13866,Enhancers_Liver_15729,Enhancers_Liver_15730,Enhancers_Liver_16686,Enhancers_Liver_16689,Enhancers_Liver_17666,Enh…
GO:0009611	response to wounding	1.39682	164	117.409	0.000846	1.44156	74	51.3333	0.0161	Abcc8,Acta2,Adam17,Adrb1,Alox5,Ano6,Anxa2,Apoe,Cask,Cd34,Cd9,Ceacam10,Celsr1,Clasp1,Col1a1,Crp,Ddr2,Enpp1,Epha4,Evpl,Ext1,F11,F2r,Fermt1,Fgf1,Foxa2,Foxf1,Gata4,Gdnf,Grin2a,Hmgb1,Igf1,Igf1r,Jun,Kank1,Kremen1,Map2k1,Map3k1,Mustn1,Ndufs4,Neo1,Notch2,Nrep,Nrg1,Pdgfra,Pecam1,Ppara,Pparg,Prkcd,Prkce,Prkg1,Pten,Ptk7,Ptn,Ptprf,Rgma,Rtn4rl1,Sarm1,Scarf1,Scrib,Serpinb2,Serpinc1,Shh,Smad3,Srsf5,St3gal4,Tafa…		Enhancers_Liver_11407,Enhancers_Liver_11424,Enhancers_Liver_13839,Enhancers_Liver_13866,Enhancers_Liver_14153,Enhancers_Liver_15090,Enhancers_Liver_152,Enhancers_Liver_155,Enhancers_Liver_156,Enhancers_Liver_15841,Enhancers_Liver_16465,Enhancers_Liver_17418,Enhancers_Liver_19155,Enhancers_Liver_19156,Enhancers_Liver_19157,Enhancers_Liver_19217,Enhancers_Liver_19241,Enhancers_Liver_19326,Enhancers…
GO:0010862	positive regulation of pathway-restricted SMAD protein phosphorylation	2.05602	40	19.4551	0.000861	2.14286	15	7	0.0429	Acvr2a,Bmp10,Bmp2,Bmp4,Dab2,Gdf10,Gdf11,Inhba,Inhbb,Pparg,Rbpms,Tgfb2,Tgfbr1,Tgfbr2,Twsg1		Enhancers_Liver_11185,Enhancers_Liver_21197,Enhancers_Liver_21238,Enhancers_Liver_26416,Enhancers_Liver_26673,Enhancers_Liver_26674,Enhancers_Liver_26709,Enhancers_Liver_26711,Enhancers_Liver_26714,Enhancers_Liver_26715,Enhancers_Liver_26716,Enhancers_Liver_26717,Enhancers_Liver_26725,Enhancers_Liver_29041,Enhancers_Liver_3132,Enhancers_Liver_38462,Enhancers_Liver_38468,Enhancers_Liver_48032,Enha…
GO:0071679	commissural neuron axon guidance	2.55252	25	9.79423	0.000861	3.23077	7	2.16667	0.0451	Fzd3,Gdnf,Nfib,Nrp1,Ptch1,Shh,Vegfa		Enhancers_Liver_23190,Enhancers_Liver_27526,Enhancers_Liver_29171,Enhancers_Liver_37801,Enhancers_Liver_37806,Enhancers_Liver_37827,Enhancers_Liver_37845,Enhancers_Liver_37846,Enhancers_Liver_59840,Enhancers_Liver_59841,Enhancers_Liver_59860,Enhancers_Liver_59861,Enhancers_Liver_59869,Enhancers_Liver_59886,Enhancers_Liver_59901,Enhancers_Liver_64024,Enhancers_Liver_83875,Enhancers_Liver_83884,Enh…
GO:0030335	positive regulation of cell migration	1.26962	292	229.99	0.000914	1.38043	127	92	0.00345	Abcc1,Abl2,Ackr3,Acta2,Actn4,Adam17,Adora3,Akap12,Akt3,Amotl1,Angpt1,Angptl3,Ano6,App,Arf6,Atp5a1,Bcas3,Bmp2,Bmp4,Ccn1,Cdh5,Cib1,Clasp1,Col18a1,Col1a1,Creb3,Csf1,Ctsh,Cxcl17,Dab2,Dab2ip,Ddr2,Dicer1,Dock5,Dock7,Edn1,Egr1,Elp3,Epha4,Ets1,F2r,Fermt1,Fgf1,Fgr,Flt1,Foxf1,Foxp1,Fzd4,Gab1,Grb7,Has2,Hdac6,Hdac9,Hgf,Hif1a,Hmgb1,Igf1,Igf1r,Igf2,Igfbp5,Il6st,Insr,Irs1,Itga2,Itgb3,Jun,Kdr,Lamc2,Map2k1,Map4k4…		Enhancers_Liver_10347,Enhancers_Liver_10363,Enhancers_Liver_13483,Enhancers_Liver_14024,Enhancers_Liver_14561,Enhancers_Liver_14586,Enhancers_Liver_14988,Enhancers_Liver_14991,Enhancers_Liver_15090,Enhancers_Liver_152,Enhancers_Liver_15350,Enhancers_Liver_155,Enhancers_Liver_156,Enhancers_Liver_15729,Enhancers_Liver_15730,Enhancers_Liver_15841,Enhancers_Liver_16226,Enhancers_Liver_16227,Enhancers…
GO:0009725	response to hormone	1.30633	240	183.721	0.000934	1.42742	118	82.6667	0.00206	Aanat,Acaca,Adcy6,Adcy8,Adra1a,Agtr1b,Akr1c20,Akt3,Appl2,Ar,Arid5a,Arsb,Ash2l,Atp1a1,Bcas3,Bmp4,Ccnd1,Ceacam10,Cntnap2,Creb1,Cry1,Dab2,Echdc3,Edn1,Ednrb,Efna5,Egr1,Eif2b2,Enpp1,Eprs,Esr1,Fbxo32,Foxo1,Fshr,Gata4,Gatm,Gdnf,Ghsr,Gnrh1,Grb14,Gsk3b,Hdac9,Hmgb1,Hpn,Hsd3b4,Idh1,Igf1,Igf1r,Igf2,Il1rn,Inhba,Insr,Irf1,Irs1,Kank1,Kcnma1,Khk,Klf9,Lhcgr,Lmbrd1,Lmo2,Lpin1,Map2k1,Mapk1,Me1,Mmp14,Nck1,Ncoa2,Nfkb…		Enhancers_Liver_1013,Enhancers_Liver_106,Enhancers_Liver_107,Enhancers_Liver_112,Enhancers_Liver_12798,Enhancers_Liver_14474,Enhancers_Liver_14497,Enhancers_Liver_14561,Enhancers_Liver_14586,Enhancers_Liver_152,Enhancers_Liver_155,Enhancers_Liver_156,Enhancers_Liver_1626,Enhancers_Liver_16262,Enhancers_Liver_1627,Enhancers_Liver_16282,Enhancers_Liver_16283,Enhancers_Liver_16500,Enhancers_Liver_16…
GO:0044264	cellular polysaccharide metabolic process	1.71914	66	38.3913	0.00104	1.70526	27	15.8333	0.0498	Adrb1,B3gnt2,B3gnt2,Enpp1,Ext1,Ext2,Gbe1,Gsk3b,Has2,Has3,Hmgb1,Igf1,Igf2,Il6st,Insr,Irs1,Khk,Ndst1,Pgm1,Pgm2,Phka2,Ppp1cb,Ppp1r1a,Prkag2,Pygl,Rb1cc1,Ugp2		Enhancers_Liver_11842,Enhancers_Liver_11846,Enhancers_Liver_11906,Enhancers_Liver_11938,Enhancers_Liver_152,Enhancers_Liver_155,Enhancers_Liver_156,Enhancers_Liver_18545,Enhancers_Liver_18546,Enhancers_Liver_18547,Enhancers_Liver_18550,Enhancers_Liver_18551,Enhancers_Liver_18554,Enhancers_Liver_2189,Enhancers_Liver_2194,Enhancers_Liver_2200,Enhancers_Liver_2214,Enhancers_Liver_2220,Enhancers_Live…
GO:0006672	ceramide metabolic process	1.85254	53	28.6094	0.00107	1.78022	27	15.1667	0.0309	Acer2,Asah2,B3galt1,B4galt6,Ccn1,Cerk,Cers6,Cert1,Cln8,Gba2,Gm2a,Itgb8,Ormdl2,P2rx1,Plpp1,Prkcd,Sgms1,Smpd3,Sptlc1,Sptlc2,St3gal3,St6galnac1,St6galnac3,St6galnac4,St6galnac5,St8sia2,Ugcg		Enhancers_Liver_11182,Enhancers_Liver_12873,Enhancers_Liver_13708,Enhancers_Liver_13715,Enhancers_Liver_16524,Enhancers_Liver_19815,Enhancers_Liver_20851,Enhancers_Liver_20860,Enhancers_Liver_20866,Enhancers_Liver_22741,Enhancers_Liver_23991,Enhancers_Liver_24774,Enhancers_Liver_26125,Enhancers_Liver_32164,Enhancers_Liver_40431,Enhancers_Liver_44425,Enhancers_Liver_44440,Enhancers_Liver_47415,Enh…
GO:0010463	mesenchymal cell proliferation	1.66304	73	43.8955	0.00115	2.11111	19	9	0.0206	Bmp2,Bmp4,Dchs1,Fgfr2,Foxf1,Foxp1,Gpc3,Hmgb1,Irs1,Kdr,Nfib,Ptn,Shh,Six1,Sox9,Tbx2,Tgfbr2,Vegfa,Wnt5a		Enhancers_Liver_14561,Enhancers_Liver_14586,Enhancers_Liver_152,Enhancers_Liver_155,Enhancers_Liver_156,Enhancers_Liver_16226,Enhancers_Liver_16227,Enhancers_Liver_16228,Enhancers_Liver_16229,Enhancers_Liver_16234,Enhancers_Liver_16262,Enhancers_Liver_16282,Enhancers_Liver_16283,Enhancers_Liver_18755,Enhancers_Liver_2189,Enhancers_Liver_2194,Enhancers_Liver_2200,Enhancers_Liver_2214,Enhancers_Liv…
GO:0045926	negative regulation of growth	1.40473	147	104.647	0.00141	1.53086	62	40.5	0.0105	Adrb1,Alox8,Atxn2,Bcl11a,Bmp10,Bmp4,Cdkl3,Cgref1,Cgrrf1,Ctdp1,Dab2,Dab2ip,Dcstamp,Ddx3x,Dnajb2,Enpp1,Fhl1,Foxk1,Foxp1,Gpc3,Gsk3b,Hif1a,Hnf4a,Ifrd1,Igfbp5,Inhba,Ip6k2,Jarid2,Meis1,Mul1,Myl2,Nme6,Nrp1,Osgin2,Pnpt1,Ppara,Pparg,Prdm11,Ptch1,Pten,Ptk6,Rbbp7,Rgma,Sema3a,Sema3e,Sema4b,Sema4d,Sh3bp4,Slc6a4,Slit3,Smad3,Stc2,Stk3,Stk4,Tgfb2,Tgfbr2,Tnr,Tomm70a,Trp53,Vgll4,Wnt5a,Wt1		Enhancers_Liver_11714,Enhancers_Liver_11990,Enhancers_Liver_12052,Enhancers_Liver_12163,Enhancers_Liver_12164,Enhancers_Liver_12365,Enhancers_Liver_12730,Enhancers_Liver_13468,Enhancers_Liver_13483,Enhancers_Liver_14003,Enhancers_Liver_14007,Enhancers_Liver_18012,Enhancers_Liver_1856,Enhancers_Liver_18819,Enhancers_Liver_18820,Enhancers_Liver_2058,Enhancers_Liver_2060,Enhancers_Liver_2061,Enhance…
GO:0009887	animal organ morphogenesis	1.2334	344	278.903	0.0015	1.54902	158	102	5.33e-06	Abl2,Acvr2a,Afdn,Agtr1b,Ahr,Akt3,Aldh1a1,Aldh1a3,Alpk2,Alx4,Ar,Arid2,Asxl1,Atrn,Axin1,Bcor,Bmp2,Bmp4,Ccdc154,Cd34,Cdh1,Cdh2,Celsr1,Cert1,Chd7,Col1a1,Col1a2,Csf1,Dab2,Dact1,Dchs1,Dicer1,Dkk1,Dlc1,Dlg1,Dll1,Dscaml1,Edn1,Egflam,Enpp1,Ephb1,Ext1,Ext2,Eya1,Fancc,Fat1,Fbxw11,Fgf1,Fgf23,Fgf6,Fgfr2,Fgr,Flrt2,Flt1,Foxf1,Fst,Fzd3,Gata4,Gdf11,Gdnf,Gli2,Gli3,Gpc3,Grcc10,Grhl2,Gsk3b,Has2,Hgf,Hif1a,Hipk2,Hoxb1…		Enhancers_Liver_11185,Enhancers_Liver_11322,Enhancers_Liver_11424,Enhancers_Liver_11714,Enhancers_Liver_12163,Enhancers_Liver_12164,Enhancers_Liver_12258,Enhancers_Liver_12264,Enhancers_Liver_12271,Enhancers_Liver_12274,Enhancers_Liver_12365,Enhancers_Liver_13926,Enhancers_Liver_14003,Enhancers_Liver_14007,Enhancers_Liver_14507,Enhancers_Liver_14561,Enhancers_Liver_14586,Enhancers_Liver_1494,Enha…
GO:0046394	carboxylic acid biosynthetic process	1.45066	124	85.4783	0.00156	1.4296	66	46.1667	0.0294	Abcd3,Abhd3,Acaca,Acacb,Acsm2,Acsm5,Acss1,Agxt2,Akr1a1,Akr1d1,Aldh1a1,Aldh1a3,Aldh8a1,Alox5,Alox8,Asah2,Baat,Bhmt,Bhmt2,Cbr4,Ceacam10,Ces1c,Ces1c,Cyp4a12a,Cyp7b1,Dhrs9,Edn1,Elovl4,Elovl5,Erlin2,Fabp5,Gatm,Ggt1,Gls,Glul,Gulo,Hacd3,Hnf4a,Hpgds,Ldha,Lipg,Lpgat1,Malrd1,Mgst2,Mid1ip1,Mlxipl,Mthfd1l,Pah,Pecr,Phgdh,Pla2g10,Pnpla8,Prkaa2,Prkab2,Prkag2,Psat1,Ptgs1,Qki,Sephs1,Shmt1,Slc45a3,Srr,Star,Stard4,…		Enhancers_Liver_1013,Enhancers_Liver_13468,Enhancers_Liver_13781,Enhancers_Liver_14474,Enhancers_Liver_14497,Enhancers_Liver_15662,Enhancers_Liver_15663,Enhancers_Liver_1626,Enhancers_Liver_1627,Enhancers_Liver_18124,Enhancers_Liver_18126,Enhancers_Liver_1818,Enhancers_Liver_22151,Enhancers_Liver_22152,Enhancers_Liver_22155,Enhancers_Liver_22165,Enhancers_Liver_22708,Enhancers_Liver_23756,Enhance…
GO:0051146	striated muscle cell differentiation	1.49839	103	68.7404	0.0018	1.54717	41	26.5	0.0426	Adrb1,Akap13,Asb2,Bmp10,Bmp2,Bmp4,Ccnd2,Cdh2,Cdon,Ctdp1,Dkk1,Dll1,Edn1,Fdps,Foxp1,Gata4,Gsk3b,Hdac6,Hdac9,Igf1,Igf2,Igfbp5,Klf5,Met,Mmp14,Mylk2,Mylk3,Nfatc3,Nkx2-5,Nln,Nr3c1,Nrg1,Ppara,Rarb,Shh,Sox6,Spag9,Stim1,Tbx3,Tomm70a,Tsc1		Enhancers_Liver_12163,Enhancers_Liver_12164,Enhancers_Liver_14988,Enhancers_Liver_14991,Enhancers_Liver_17788,Enhancers_Liver_1856,Enhancers_Liver_20285,Enhancers_Liver_22151,Enhancers_Liver_22152,Enhancers_Liver_22155,Enhancers_Liver_22165,Enhancers_Liver_24449,Enhancers_Liver_25267,Enhancers_Liver_25279,Enhancers_Liver_25287,Enhancers_Liver_25306,Enhancers_Liver_25310,Enhancers_Liver_25315,Enha…
GO:0070371	ERK1 and ERK2 cascade	1.34471	183	136.089	0.00181	1.47239	80	54.3333	0.00698	Abl2,Ace2,Ackr3,Acta2,Adam17,Adra1a,Akap12,Angpt1,Apoe,App,Arhgap8,Bmp2,Bmp4,C1qtnf3,Cavin3,Ccn1,Ceacam10,Chrna9,Cib1,Cntnap2,Ctsh,Cxcl17,Dab2,Dab2ip,Ddr2,Dlg1,Dusp1,Dusp4,Dusp6,Dusp9,Edn1,Epha4,Ephb1,Esr1,F2r,Fbxw7,Fgf1,Fgf23,Fgfr2,Fshr,Garem1,Gata4,Gpr55,Hmgb1,Igf1,Iqgap3,Itgb3,Jun,Kars,Kdr,Lif,Map2k1,Mapk1,Notch2,Nptn,Nrg1,Nrp1,Oprm1,P2ry1,P2ry6,Pdgfra,Phlpp1,Prxl2c,Psca,Pten,Rap1a,Ripk2,Sirpb…		Enhancers_Liver_10228,Enhancers_Liver_10236,Enhancers_Liver_10407,Enhancers_Liver_11322,Enhancers_Liver_152,Enhancers_Liver_155,Enhancers_Liver_156,Enhancers_Liver_15729,Enhancers_Liver_15730,Enhancers_Liver_16226,Enhancers_Liver_16227,Enhancers_Liver_16228,Enhancers_Liver_16229,Enhancers_Liver_16234,Enhancers_Liver_16262,Enhancers_Liver_16282,Enhancers_Liver_16283,Enhancers_Liver_17418,Enhancers…
GO:0072193	ureter smooth muscle cell differentiation	2.70853	20	7.38409	0.00181	6	5	0.833333	0.00607	Bmp4,Shh,Six1,Sox9,Tshz3		Enhancers_Liver_16226,Enhancers_Liver_16227,Enhancers_Liver_16228,Enhancers_Liver_16229,Enhancers_Liver_16234,Enhancers_Liver_16262,Enhancers_Liver_16282,Enhancers_Liver_16283,Enhancers_Liver_18755,Enhancers_Liver_26673,Enhancers_Liver_26674,Enhancers_Liver_26709,Enhancers_Liver_26711,Enhancers_Liver_26714,Enhancers_Liver_26715,Enhancers_Liver_26716,Enhancers_Liver_26717,Enhancers_Liver_26725,Enh…
GO:0043087	regulation of GTPase activity	1.33853	185	138.211	0.00197	1.66265	92	55.3333	8.5e-05	Abr,Adrb1,Afdn,Ajuba,Arap2,Arap3,Arhgap15,Arhgap24,Arhgap25,Arhgap29,Arhgap35,Arhgap6,Arhgef26,Asap1,Asap2,Bcar3,Bcas3,Bcr,C9orf72,Cav2,Chn2,Coro1c,Dab2ip,Dennd1b,Dgki,Dock7,Efna5,Epha4,Ephb3,F2r,Gapvd1,Garnl3,Gnao1,Gnb5,Gpr65,Gsk3b,Iqgap2,Map2k1,Map4k4,Mapre2,Met,Mtss2,Net1,Ngef,Ocrl,Pecam1,Pkp4,Plxna2,Prex1,Prkg1,Ptprn2,Ralbp1,Ralgapa2,Ralgps1,Rangap1,Rap1a,Rap1gap2,Rapgef6,Rasa4,Rasgrp4,Rcc2,R…		Enhancers_Liver_11290,Enhancers_Liver_12842,Enhancers_Liver_13747,Enhancers_Liver_13967,Enhancers_Liver_14561,Enhancers_Liver_14586,Enhancers_Liver_1472,Enhancers_Liver_1473,Enhancers_Liver_1474,Enhancers_Liver_1475,Enhancers_Liver_15841,Enhancers_Liver_17399,Enhancers_Liver_17408,Enhancers_Liver_17788,Enhancers_Liver_17835,Enhancers_Liver_18495,Enhancers_Liver_19422,Enhancers_Liver_19432,Enhance…
GO:0051345	positive regulation of hydrolase activity	1.28401	239	186.135	0.00207	1.548	129	83.3333	4.46e-05	Abl2,Abr,Acer2,Adra1a,Adrb1,Afdn,Agtr1b,Akirin2,Aph1b,App,Arap2,Arap3,Arhgap24,Arhgap25,Arhgap29,Arhgap35,Arhgap6,Arhgef26,Asap1,Asap2,Atp2a3,Bcar3,Bcas3,Bcl10,Bcr,Bmp2,C9orf72,Calm1,Calm2,Casp2,Cav2,Ccn1,Chn2,Coro1c,Cradd,Creb3,Ctsh,Dapk1,Ddx3x,Dennd1b,Dlc1,Dnaja3,Dock7,Epha4,Esr1,F2r,Fgfr2,Flt1,Garnl3,Gnao1,Gnat1,Gnb5,Gpr55,Gpr65,Gramd4,Gsk3b,Hmgb1,Hspd1,Itga2,Lmf1,Map2k1,Map3k5,Map4k4,Mapre2,M…		Enhancers_Liver_1013,Enhancers_Liver_10347,Enhancers_Liver_10363,Enhancers_Liver_11290,Enhancers_Liver_12186,Enhancers_Liver_12204,Enhancers_Liver_12205,Enhancers_Liver_12730,Enhancers_Liver_12842,Enhancers_Liver_13708,Enhancers_Liver_13715,Enhancers_Liver_13747,Enhancers_Liver_13967,Enhancers_Liver_14561,Enhancers_Liver_14586,Enhancers_Liver_1472,Enhancers_Liver_1473,Enhancers_Liver_1474,Enhance…
GO:0070482	response to oxygen levels	1.45987	114	78.0892	0.00216	1.4321	58	40.5	0.0444	Acaa2,Ada,Adam17,Ajuba,Arnt2,Atg7,Atp1b1,Atp6v0d1,Bmp2,Bnip3l,Cd34,Chrnb2,Commd1b,Cpeb4,Cr1l,Ddah1,Edn1,Egln3,Egr1,Epas1,Epha4,Flt1,Fosl2,Foxo1,Gucy1b2,Hif1a,Itpr1,Itpr2,Kcnd2,Kcnk3,Kcnma1,Kdr,Loxl2,Map2k1,Ndufs4,Nfatc3,Nr4a2,Pgf,Pik3cb,Ppara,Pparg,Prkce,Pten,Rock2,Rora,Slc8a3,Smad3,Tacc3,Tbl2,Tgfb2,Tm9sf4,Tmbim6,Tsc1,Usf1,Vasn,Vegfa,Vegfc,Zfp36l1		Enhancers_Liver_11938,Enhancers_Liver_12204,Enhancers_Liver_12205,Enhancers_Liver_12228,Enhancers_Liver_17328,Enhancers_Liver_17418,Enhancers_Liver_18255,Enhancers_Liver_18819,Enhancers_Liver_18820,Enhancers_Liver_19155,Enhancers_Liver_19156,Enhancers_Liver_19157,Enhancers_Liver_19217,Enhancers_Liver_19241,Enhancers_Liver_19369,Enhancers_Liver_19371,Enhancers_Liver_19372,Enhancers_Liver_19378,Enh…
GO:0000122	negative regulation of transcription by RNA polymerase II	1.20782	388	321.241	0.00216	1.29455	178	137.5	0.00496	Ahr,Ajuba,Akirin2,Ankrd33,App,Ar,Arid4a,Arid5a,Atf7ip,Atn1,Bach1,Bach2,Bcl11a,Bcor,Bend3,Bmp2,Bmp4,Cbfb,Cbx4,Cbx8,Ccnd1,Ccne1,Cops2,Cpeb3,Cry1,Cux2,Dab2,Dab2ip,Dact1,Dicer1,Dkk1,Dlg1,Dmbx1,Dmrt1,Dnaja3,Dnmt3a,E2f6,Edn1,Ednrb,Egr1,Eomes,Epas1,Esr1,Ets2,Etv6,Fbln5,Fgfr2,Fnip2,Foxf1,Foxp1,Frk,Fst,Gabpa,Gata4,Gatad2a,Gli2,Gli3,Glis2,Gm28047,Gm45837,Hdac6,Hdac9,Hey1,Hic1,Hif1a,Hipk2,Hmbox1,Hmgb1,Hnrnp…		Enhancers_Liver_10347,Enhancers_Liver_10363,Enhancers_Liver_106,Enhancers_Liver_107,Enhancers_Liver_1076,Enhancers_Liver_11185,Enhancers_Liver_112,Enhancers_Liver_11990,Enhancers_Liver_12163,Enhancers_Liver_12164,Enhancers_Liver_12696,Enhancers_Liver_12730,Enhancers_Liver_13483,Enhancers_Liver_13797,Enhancers_Liver_14561,Enhancers_Liver_14586,Enhancers_Liver_14743,Enhancers_Liver_15143,Enhancers_…
GO:0009719	response to endogenous stimulus	1.19141	440	369.311	0.00216	1.31154	214	163.167	0.000865	Aanat,Abcc1,Acaca,Acvr2a,Adam17,Adcy6,Adcy8,Adra1a,Agtr1b,Ahr,Akp3,Akr1c20,Akt3,Apoe,App,Appl2,Ar,Arf6,Arid4a,Arid5a,Arsb,Ash2l,Atp1a1,Axin1,Bcas3,Bmp2,Bmp4,Bmpr1b,Casq2,Cav2,Ccnd1,Cd9,Cdh1,Cdkn2b,Ceacam10,Ces1c,Ces1c,Cib1,Cntnap2,Col1a1,Col1a2,Cpeb3,Cpeb4,Creb1,Cry1,Ctnna1,Dab2,Dab2ip,Dnmt3a,Echdc3,Edn1,Ednrb,Efna5,Egr1,Egr3,Ehd1,Eif2b2,Eme1,Enpp1,Epha4,Eprs,Esr1,Ext1,Ext2,Fbh1,Fbxo32,Fermt1,Fox…		Enhancers_Liver_1013,Enhancers_Liver_106,Enhancers_Liver_107,Enhancers_Liver_112,Enhancers_Liver_12204,Enhancers_Liver_12205,Enhancers_Liver_12228,Enhancers_Liver_12798,Enhancers_Liver_13483,Enhancers_Liver_14003,Enhancers_Liver_14007,Enhancers_Liver_14474,Enhancers_Liver_14497,Enhancers_Liver_14561,Enhancers_Liver_14586,Enhancers_Liver_14988,Enhancers_Liver_14991,Enhancers_Liver_15075,Enhancers_…
GO:0045936	negative regulation of phosphate metabolic process	1.31263	203	154.651	0.0022	1.36817	96	70.1667	0.0175	Adar,Ahr,Aida,Aida,Ajuba,Angpt1,Apoe,Atxn7,Bmp2,Bmp4,Bod1,C9orf72,Cactin,Camk2n1,Cdkn2b,Ceacam10,Cib1,Coro1c,Ctdspl,Dab2ip,Ddr2,Dkk1,Dnaja3,Dnajc10,Dtnbp1,Dusp1,Dusp16,Dusp6,Enpp1,Fbxo7,Foxa2,Gfra2,Ggnbp2,Gsk3b,Hgf,Hnf4a,Hpn,Ibtk,Igbp1,Igf1,Insr,Irf1,Jun,Lpin1,Met,Mlxipl,Nck1,Nckap1l,Niban1,Npm1,Ocln,Pard3,Pbk,Pecam1,Pik3cb,Pik3ip1,Pip5kl1,Ppara,Pparg,Ppargc1a,Ppp1r36,Ppp2ca,Ppp2ca,Ppp4r4,Prkag2,…		Enhancers_Liver_10228,Enhancers_Liver_10236,Enhancers_Liver_11216,Enhancers_Liver_12186,Enhancers_Liver_12730,Enhancers_Liver_12798,Enhancers_Liver_13483,Enhancers_Liver_14519,Enhancers_Liver_15302,Enhancers_Liver_15841,Enhancers_Liver_17301,Enhancers_Liver_17328,Enhancers_Liver_17666,Enhancers_Liver_17667,Enhancers_Liver_17835,Enhancers_Liver_18964,Enhancers_Liver_19369,Enhancers_Liver_19371,Enh…
GO:0010942	positive regulation of cell death	1.24328	298	239.689	0.00245	1.3211	144	109	0.00742	Acer2,Adam17,Adrb1,Aifm1,Akap12,Aldh1a1,Aldh1a3,Ano6,Apoe,App,Atg7,Bcl10,Bcl2l14,Blk,Bmp2,Bmp4,Bmpr1b,Bnip3l,C6,Casp2,Ccn1,Cdc42,Ceacam10,Chek2,Clu,Col18a1,Cradd,Creb1,Ctnna1,Ctnnbl1,Ctsc,Ctsh,Dab2ip,Dapk1,Ddr2,Ddx3x,Dhodh,Dkk1,Dlc1,Dnaja3,Dnmt3a,Dusp1,Dusp6,Dusp9,Egr1,Fbh1,Fbxo32,Fbxw7,Foxo1,Foxp1,Gal,Grin2a,Gsk3b,Hba-a2,Hdac6,Hif1a,Hmgb1,Hp,Hspd1,Htra1,Inhba,Inhbb,Ip6k2,Irf1,Itm2c,Itpr1,Jun,Kcn…		Enhancers_Liver_10228,Enhancers_Liver_10236,Enhancers_Liver_10347,Enhancers_Liver_10363,Enhancers_Liver_10454,Enhancers_Liver_1079,Enhancers_Liver_1092,Enhancers_Liver_1098,Enhancers_Liver_12186,Enhancers_Liver_12204,Enhancers_Liver_12205,Enhancers_Liver_12244,Enhancers_Liver_12730,Enhancers_Liver_12798,Enhancers_Liver_13483,Enhancers_Liver_14153,Enhancers_Liver_15143,Enhancers_Liver_15156,Enhanc…
GO:0043117	positive regulation of vascular permeability	2.70372	19	7.02736	0.00245	3	9	3	0.0279	Angpt1,Gm45837,Ocln,Ptp4a3,Tacr1,Tjp1,Tjp2,Trpv4,Vegfa		Enhancers_Liver_24206,Enhancers_Liver_24209,Enhancers_Liver_24210,Enhancers_Liver_30095,Enhancers_Liver_30108,Enhancers_Liver_30115,Enhancers_Liver_31243,Enhancers_Liver_37801,Enhancers_Liver_37806,Enhancers_Liver_37827,Enhancers_Liver_37845,Enhancers_Liver_37846,Enhancers_Liver_44049,Enhancers_Liver_67011,Enhancers_Liver_71118,Enhancers_Liver_71123,Enhancers_Liver_75587,Enhancers_Liver_75589,Enh…
GO:0001667	ameboidal-type cell migration	1.26392	264	208.874	0.00245	1.39408	102	73.1667	0.00834	Acta2,Adam17,Adamts9,Adgrb1,Akap12,Akt3,Amotl1,Angpt1,Apoe,Appl2,Arf6,Arsb,Atp5a1,Bcas3,Bmp10,Bmp4,Cd63,Cdc42,Cdh2,Cdh5,Ceacam10,Cib1,Clasp1,Clec14a,Col18a1,Coro1c,Ctsh,Dab2ip,Ddr2,Dicer1,Dock5,Edn1,Ednrb,Efnb1,Egr3,Emp2,Ets1,Fbxw7,Fermt1,Fgf1,Fndc3b,Foxp1,Gdnf,Glul,Has2,Hdac6,Hdac9,Hif1a,Hmgb1,Igf1,Igf2,Irs1,Itga2,Itgb3,Jun,Kank1,Kdr,Loxl2,Lpxn,Map4k4,Mapre2,Mcc,Meox2,Met,Myh9,Nos3,Nrp1,Nrp2,Pdc…		Enhancers_Liver_11194,Enhancers_Liver_11196,Enhancers_Liver_14561,Enhancers_Liver_14586,Enhancers_Liver_1494,Enhancers_Liver_1516,Enhancers_Liver_152,Enhancers_Liver_1533,Enhancers_Liver_155,Enhancers_Liver_156,Enhancers_Liver_15729,Enhancers_Liver_15730,Enhancers_Liver_15841,Enhancers_Liver_16226,Enhancers_Liver_16227,Enhancers_Liver_16228,Enhancers_Liver_16229,Enhancers_Liver_16234,Enhancers_Li…
GO:0060562	epithelial tube morphogenesis	1.52685	91	59.5999	0.00245	1.69091	31	18.3333	0.035	Asb2,Bmp4,Dll1,Epha4,Eya1,Fgf1,Foxp1,Gata4,Gli2,Gpc3,Greb1l,Hif1a,Kdr,Lhx1,Mib1,Mtss1,Nkx2-5,Notch2,Nr3c1,Pkd2,Psen1,Ptch1,Scrib,Shh,Smad3,Tbx2,Tbx3,Tead1,Tgfbr2,Wnt5a,Wnt9b		Enhancers_Liver_12163,Enhancers_Liver_12164,Enhancers_Liver_14507,Enhancers_Liver_14561,Enhancers_Liver_14586,Enhancers_Liver_15672,Enhancers_Liver_175,Enhancers_Liver_18819,Enhancers_Liver_18820,Enhancers_Liver_19520,Enhancers_Liver_19521,Enhancers_Liver_20285,Enhancers_Liver_2097,Enhancers_Liver_23190,Enhancers_Liver_26035,Enhancers_Liver_26036,Enhancers_Liver_26040,Enhancers_Liver_26673,Enhanc…
GO:0042445	hormone metabolic process	1.48375	101	68.0707	0.00245	1.6875	54	32	0.00307	Aanat,Adh6a,Akr1c14,Akr1c20,Akr1d1,Aldh1a1,Aldh1a3,Aldh8a1,Atp1a1,Bmp2,Bmpr1b,Corin,Cpq,Ctsb,Cyp26a1,Dab2,Ddo,Dhrs9,Dio2,Ednrb,Egr1,Enpp1,Esr1,Fshr,Gal,Hif1a,Hpn,Hsd17b11,Hsd17b7,Hsd3b4,Ide,Igf1,Igf1r,Igf2,Iyd,Kcnma1,Lhcgr,Nfkb1,Nr3c1,Nr5a1,Pcsk2,Pcsk6,Pde8b,Pdgfra,Plb1,Plekha1,Ppargc1a,Shh,Slc16a2,Star,Stc2,Tiparp,Ttr,Yipf5		Enhancers_Liver_12163,Enhancers_Liver_12164,Enhancers_Liver_16500,Enhancers_Liver_18819,Enhancers_Liver_18820,Enhancers_Liver_19854,Enhancers_Liver_20907,Enhancers_Liver_20928,Enhancers_Liver_23842,Enhancers_Liver_25733,Enhancers_Liver_25734,Enhancers_Liver_27367,Enhancers_Liver_28554,Enhancers_Liver_29041,Enhancers_Liver_29750,Enhancers_Liver_29751,Enhancers_Liver_29757,Enhancers_Liver_29763,Enh…
GO:0030100	regulation of endocytosis	1.44368	115	79.6573	0.00245	1.44	54	37.5	0.0498	Aak1,Actn4,Angpt1,Ankrd13d,Ano6,Anxa2,Apln,Apoe,App,Appl2,Arhgap21,Atxn2,Bicd1,Calm1,Cd63,Cdc42,Clu,Dab2,Dkk1,Dll1,Dtnbp1,Fmr1,Gpc3,Insr,Itga2,Itgb3,Lrrtm2,Mctp1,Mib1,Mtmr2,Nckap1l,Nrg1,Numb,Ophn1,Pard3,Pparg,Ppp3ca,Pten,Rab5a,Rin3,Rock1,Scrib,Scyl2,Ston1,Ston2,Syk,Syt7,Tbc1d5,Tfr2,Tnk2,Trf,Usp46,Vegfa,Wnt5a		Enhancers_Liver_11194,Enhancers_Liver_11196,Enhancers_Liver_15729,Enhancers_Liver_15730,Enhancers_Liver_19532,Enhancers_Liver_19867,Enhancers_Liver_20107,Enhancers_Liver_20127,Enhancers_Liver_20199,Enhancers_Liver_22341,Enhancers_Liver_22708,Enhancers_Liver_23446,Enhancers_Liver_23447,Enhancers_Liver_24877,Enhancers_Liver_24880,Enhancers_Liver_26035,Enhancers_Liver_26036,Enhancers_Liver_26040,Enh…
GO:0001525	angiogenesis	1.26189	259	205.247	0.00274	1.52258	118	77.5	0.000212	Abcc8,Ackr3,Adamts9,Adgrb1,Adgrb3,Adgrg1,Agtr1b,Akt3,Alox5,Amotl1,Angpt1,Angptl3,Anpep,Anxa2,Apln,Arhgap24,Bcas3,Bmp4,C6,Calcrl,Camp,Ccn1,Cd34,Cdc42,Cdh5,Ceacam10,Cemip2,Cib1,Clec14a,Col15a1,Col18a1,Ctsh,Cxcl17,Dab2ip,Ddah1,Dicer1,Dll1,Ecm1,Emp2,Epas1,Ephb1,Ephb3,Ets1,Fbln5,Fgf1,Fgf6,Fgfr2,Flt1,Fzd8,Gab1,Gata4,Ghsr,Glul,Hgf,Hif1a,Hipk2,Hmgb1,Igf2,Itgb3,Itgb8,Jmjd6,Jun,Kdr,Klf5,Lif,Loxl2,Map3k7,Me…		Enhancers_Liver_1013,Enhancers_Liver_11322,Enhancers_Liver_11714,Enhancers_Liver_14561,Enhancers_Liver_14586,Enhancers_Liver_14766,Enhancers_Liver_14784,Enhancers_Liver_1494,Enhancers_Liver_1516,Enhancers_Liver_152,Enhancers_Liver_1533,Enhancers_Liver_155,Enhancers_Liver_156,Enhancers_Liver_15729,Enhancers_Liver_15730,Enhancers_Liver_15841,Enhancers_Liver_16524,Enhancers_Liver_17328,Enhancers_Liv…
GO:0003382	epithelial cell morphogenesis	2.00604	35	17.4473	0.00274	2.30769	15	6.5	0.024	Ar,Arhgef26,Cdh1,Col15a1,Col18a1,Fat1,Flnb,Grhl2,Map3k1,Met,Palld,Pecam1,Scrib,Sipa1l3,Spint2		Enhancers_Liver_15841,Enhancers_Liver_23747,Enhancers_Liver_24662,Enhancers_Liver_24663,Enhancers_Liver_24664,Enhancers_Liver_24972,Enhancers_Liver_24988,Enhancers_Liver_25000,Enhancers_Liver_29965,Enhancers_Liver_29966,Enhancers_Liver_30438,Enhancers_Liver_54518,Enhancers_Liver_58853,Enhancers_Liver_58855,Enhancers_Liver_69187,Enhancers_Liver_69188,Enhancers_Liver_69191,Enhancers_Liver_69198,Enh…
GO:0001933	negative regulation of protein phosphorylation	1.34142	171	127.477	0.00277	1.36615	74	54.1667	0.0461	Adar,Aida,Aida,Angpt1,Apoe,Bmp2,Bmp4,C9orf72,Cactin,Camk2n1,Ceacam10,Cib1,Coro1c,Ctdspl,Dab2ip,Dkk1,Dnaja3,Dnajc10,Dtnbp1,Dusp1,Dusp16,Dusp6,Enpp1,Fbxo7,Gfra2,Ggnbp2,Gsk3b,Hgf,Hnf4a,Ibtk,Igf1,Insr,Irf1,Jun,Met,Mlxipl,Nck1,Niban1,Npm1,Ocln,Pard3,Pbk,Pecam1,Pik3cb,Pip5kl1,Pparg,Ppargc1a,Ppp2ca,Ppp2ca,Prkag2,Prkar2a,Prkar2b,Prkcd,Prnp,Psen1,Pten,Ptk6,Sema4d,Sfrp5,Sirpb1c,Slc8a3,Smad7,Socs5,Sorl1,Spr…		Enhancers_Liver_10228,Enhancers_Liver_10236,Enhancers_Liver_12730,Enhancers_Liver_12798,Enhancers_Liver_14519,Enhancers_Liver_15302,Enhancers_Liver_15841,Enhancers_Liver_17666,Enhancers_Liver_17667,Enhancers_Liver_19369,Enhancers_Liver_19371,Enhancers_Liver_19372,Enhancers_Liver_19378,Enhancers_Liver_19520,Enhancers_Liver_19521,Enhancers_Liver_20550,Enhancers_Liver_22341,Enhancers_Liver_22622,Enh…
GO:0030325	adrenal gland development	2.26184	26	11.4951	0.00282	2.72727	10	3.66667	0.0325	Igf1r,Insr,Nr3c1,Nr5a1,Pbx1,Pdgfra,Smad2,Smad3,Stra6,Wt1		Enhancers_Liver_41097,Enhancers_Liver_41111,Enhancers_Liver_41146,Enhancers_Liver_41157,Enhancers_Liver_41170,Enhancers_Liver_41173,Enhancers_Liver_41176,Enhancers_Liver_42758,Enhancers_Liver_42761,Enhancers_Liver_47818,Enhancers_Liver_47827,Enhancers_Liver_4965,Enhancers_Liver_4967,Enhancers_Liver_50033,Enhancers_Liver_50034,Enhancers_Liver_50039,Enhancers_Liver_65612,Enhancers_Liver_65614,Enhan…
GO:0042326	negative regulation of phosphorylation	1.32505	184	138.863	0.00293	1.35326	83	61.3333	0.0383	Adar,Aida,Aida,Ajuba,Angpt1,Apoe,Atxn7,Bmp2,Bmp4,C9orf72,Cactin,Camk2n1,Cdkn2b,Ceacam10,Cib1,Coro1c,Ctdspl,Dab2ip,Ddr2,Dkk1,Dnaja3,Dnajc10,Dtnbp1,Dusp1,Dusp16,Dusp6,Enpp1,Fbxo7,Foxa2,Gfra2,Ggnbp2,Gsk3b,Hgf,Hnf4a,Ibtk,Igf1,Insr,Irf1,Jun,Met,Mlxipl,Nck1,Niban1,Npm1,Ocln,Pard3,Pbk,Pecam1,Pik3cb,Pik3ip1,Pip5kl1,Ppara,Pparg,Ppargc1a,Ppp2ca,Ppp2ca,Prkag2,Prkar2a,Prkar2b,Prkcd,Prnp,Psen1,Pten,Ptk6,Rock1…		Enhancers_Liver_10228,Enhancers_Liver_10236,Enhancers_Liver_11216,Enhancers_Liver_12730,Enhancers_Liver_12798,Enhancers_Liver_14519,Enhancers_Liver_15302,Enhancers_Liver_15841,Enhancers_Liver_17666,Enhancers_Liver_17667,Enhancers_Liver_19369,Enhancers_Liver_19371,Enhancers_Liver_19372,Enhancers_Liver_19378,Enhancers_Liver_19520,Enhancers_Liver_19521,Enhancers_Liver_20550,Enhancers_Liver_22341,Enh…
GO:0030097	hemopoiesis	1.27995	230	179.695	0.00297	1.3682	109	79.6667	0.0104	Acvr2a,Ada,Adar,Ahctf1,Ahr,Angpt1,Arid1b,Arid2,Asxl1,Atg7,Atp11c,Bcr,Bmp4,Brd1,Cbfb,Cd34,Cdk13,Ceacam10,Cib1,Creb1,Csf1,Csf3r,Dcstamp,Dicer1,Dll1,Drosha,Egr3,Epas1,Ets1,Fbxo7,Fbxw7,Foxp1,Fshr,Gabpa,Gli3,Gm9774,Gpr55,Gsk3b,Hif1a,Hmgb1,Hspa9,Ikzf3,Il15,Inhba,Inpp4b,Irf1,Itgb3,Jun,Kat6a,Kdr,Kirrel3,Klf13,Lif,Lmo2,Lrrc17,Meis1,Mmp14,Myo1e,Nckap1l,Nfkbiz,Nkx2-5,Notch2,Ocstamp,Pbrm1,Pbx1,Pou4f1,Ppargc1…		Enhancers_Liver_1013,Enhancers_Liver_11322,Enhancers_Liver_11714,Enhancers_Liver_12163,Enhancers_Liver_12164,Enhancers_Liver_12798,Enhancers_Liver_13839,Enhancers_Liver_152,Enhancers_Liver_15350,Enhancers_Liver_155,Enhancers_Liver_156,Enhancers_Liver_15729,Enhancers_Liver_15730,Enhancers_Liver_1626,Enhancers_Liver_1627,Enhancers_Liver_16592,Enhancers_Liver_17835,Enhancers_Liver_18495,Enhancers_Li…

## Sheet: Liver enhancers down ancestral 
GO	Name	Binom Enrichment	# foreground regions	# expected regions	Binom BH p-value	Hyper Enrichment	# foreground genes	# expected genes	Hyper BH p-value	Genes	Regions
GO:0048534	hematopoietic or lymphoid organ development	1.67361	314	187.619	7.79e-15	1.48645	130	87.4566	0.000104	Actb,Acvr2a,Ada,Adam17,Adam8,Add2,Ahr,Ankrd54,Apcs,Arid1b,Arid2,Bcl2l11,Bmp4,Cbfb,Ccdc134,Ccl5,Ccnb2,Cd24a,Cd34,Cd83,Cdh17,Ceacam10,Csf1,Ctnnb1,Cxcr5,Dicer1,Dll1,Dtx1,Dusp10,Epas1,Ets1,Evi2,Fos,Foxj1,Foxn1,Foxp1,Gata3,Gfi1b,Gimap5,Gimap5,Gm49359,Gm49359,Gm9774,Gpr68,Gsk3b,H2-Aa,Hcls1,Hif1a,Hlx,Hmgb1,Ihh,Il10,Il15,Il2rg,Inhba,Inpp4b,Itgb3,Jag1,Jarid2,Jun,Kdr,Kirrel3,Kit,Klf13,Klf4,Lck,Lmo4,Lrp5,Lt…	Enhancers_Liver_11726,Enhancers_Liver_11729,Enhancers_Liver_11730,Enhancers_Liver_118,Enhancers_Liver_12550,Enhancers_Liver_13657,Enhancers_Liver_13666,Enhancers_Liver_13671,Enhancers_Liver_13672,Enhancers_Liver_13838,Enhancers_Liver_14139,Enhancers_Liver_14230,Enhancers_Liver_14231,Enhancers_Liver_14232,Enhancers_Liver_14234,Enhancers_Liver_14235,Enhancers_Liver_14428,Enhancers_Liver_15718,Enhan…
GO:0030036	actin cytoskeleton organization	1.60345	348	217.032	2.67e-14	1.64381	162	98.5518	1.25e-08	1700009N14Rik,Abl2,Ablim3,Abr,Actb,Actc1,Actn1,Actn4,Add2,Akap13,Amot,Amotl1,Amotl2,Antxr1,Aqp1,Arap1,Arf6,Arhgap18,Arhgap26,Arhgap26,Arhgap6,Arhgef10,Arhgef17,Arhgef5,Arrb1,Asb2,Atp2c1,Baiap2l1,Bcar1,Bcas3,Bmp10,C9orf72,Cdc42,Cdc42ep2,Clasp1,Cldn19,Coro2b,Cul3,Cxadr,Cyrib,Daam1,Daam2,Dbn1,Dixdc1,Dlc1,Dlg1,Dstn,Dtnbp1,Edn1,Efna5,Ehbp1,Elmo1,Epb41,Epb41l2,Epb41l5,Epha3,Evl,Fam171a1,Farp1,Fchsd2,Fe…	Enhancers_Liver_11070,Enhancers_Liver_11876,Enhancers_Liver_11882,Enhancers_Liver_13436,Enhancers_Liver_13882,Enhancers_Liver_13891,Enhancers_Liver_13958,Enhancers_Liver_13971,Enhancers_Liver_14030,Enhancers_Liver_14031,Enhancers_Liver_14040,Enhancers_Liver_14041,Enhancers_Liver_14054,Enhancers_Liver_14079,Enhancers_Liver_14082,Enhancers_Liver_14086,Enhancers_Liver_14091,Enhancers_Liver_14094,Enh…
GO:0030029	actin filament-based process	1.54649	378	244.425	1.19e-13	1.63856	181	110.463	1.61e-09	1700009N14Rik,Abcc9,Abl2,Ablim3,Abr,Actb,Actc1,Actn1,Actn4,Add2,Adrb1,Akap13,Amot,Amotl1,Amotl2,Ank2,Antxr1,Aqp1,Arap1,Arf6,Arhgap18,Arhgap26,Arhgap26,Arhgap6,Arhgef10,Arhgef17,Arhgef5,Arrb1,Asb2,Atp1a1,Atp2c1,Baiap2l1,Bcar1,Bcas3,Bmp10,C9orf72,Ccdc88c,Cdc42,Cdc42ep2,Clasp1,Cldn19,Coro2b,Cul3,Cxadr,Cyrib,Daam1,Daam2,Dbn1,Dixdc1,Dlc1,Dlg1,Dstn,Dtnbp1,Edn1,Efna5,Ehbp1,Elmo1,Epb41,Epb41l2,Epb41l5,Ep…	Enhancers_Liver_11070,Enhancers_Liver_11876,Enhancers_Liver_11882,Enhancers_Liver_13092,Enhancers_Liver_13436,Enhancers_Liver_13882,Enhancers_Liver_13891,Enhancers_Liver_13958,Enhancers_Liver_13971,Enhancers_Liver_14030,Enhancers_Liver_14031,Enhancers_Liver_14040,Enhancers_Liver_14041,Enhancers_Liver_14054,Enhancers_Liver_14079,Enhancers_Liver_14082,Enhancers_Liver_14086,Enhancers_Liver_14091,Enh…
GO:0045321	leukocyte activation	1.51565	385	254.016	8.38e-13	1.40588	192	136.569	2.89e-05	Abl2,Abr,Actb,Ada,Adam17,Adam8,Adora2a,Adora3,Ahr,App,Arid1b,Arid2,Bid,Blk,Blm,Bmi1,Bmp4,Cbfb,Cblb,Ccdc88b,Ccl5,Cd226,Cd24a,Cd274,Cd276,Cd3e,Cd59b,Cd79b,Cd83,Cd84,Cd8a,Cdh17,Ceacam10,Chd7,Cracr2a,Csf2,Ctnnb1,Ctsc,Cxadr,Cxcl12,Cxcr5,Cyrib,Dicer1,Dlg1,Dlg5,Dll1,Dock10,Dtx1,Dusp10,Efnb1,Elf4,Fcgr4,Fgr,Foxf1,Foxj1,Foxn1,Foxp1,Fzd8,Gab2,Gadd45g,Gata3,Gimap1,Gimap5,Gimap5,Gm9774,Gnrh1,Gpr89,H2-Aa,H2-DM…	Enhancers_Liver_10357,Enhancers_Liver_10360,Enhancers_Liver_10374,Enhancers_Liver_10781,Enhancers_Liver_11402,Enhancers_Liver_11793,Enhancers_Liver_118,Enhancers_Liver_12294,Enhancers_Liver_12550,Enhancers_Liver_12826,Enhancers_Liver_13958,Enhancers_Liver_13971,Enhancers_Liver_14079,Enhancers_Liver_14082,Enhancers_Liver_14086,Enhancers_Liver_14091,Enhancers_Liver_14094,Enhancers_Liver_14096,Enhan…
GO:0046130	purine ribonucleoside catabolic process	15.5981	18	1.15398	8.38e-13	3.83047	5	1.30532	0.0432	Ada,Ahcy,Enpp4,Uox,Xdh	Enhancers_Liver_37735,Enhancers_Liver_37737,Enhancers_Liver_38741,Enhancers_Liver_38755,Enhancers_Liver_38762,Enhancers_Liver_38764,Enhancers_Liver_38765,Enhancers_Liver_51857,Enhancers_Liver_51858,Enhancers_Liver_51861,Enhancers_Liver_51865,Enhancers_Liver_51868,Enhancers_Liver_52320,Enhancers_Liver_57465,Enhancers_Liver_57467,Enhancers_Liver_57469,Enhancers_Liver_57470,Enhancers_Liver_57472
GO:0001775	cell activation	1.475	415	281.356	1.96e-12	1.38327	209	151.091	2.89e-05	Abl2,Abr,Actb,Ada,Adam17,Adam8,Adora2a,Adora3,Ahr,App,Arid1b,Arid2,Bid,Blk,Blm,Bmi1,Bmp4,Bmper,Cbfb,Cblb,Ccdc88b,Ccl5,Cd226,Cd24a,Cd274,Cd276,Cd3e,Cd59b,Cd79b,Cd83,Cd84,Cd8a,Cdh17,Ceacam10,Chd7,Cracr2a,Csf2,Ctnnb1,Ctsc,Cxadr,Cxcl12,Cxcr5,Cyrib,Ddr2,Dicer1,Dlg1,Dlg5,Dll1,Dock10,Dtx1,Dusp10,Efnb1,Elf4,Evl,F2r,Fcgr4,Fgfr1,Fgr,Foxf1,Foxj1,Foxn1,Foxp1,Fzd8,Gab2,Gadd45g,Gata3,Gclc,Gimap1,Gimap5,Gimap5,…	Enhancers_Liver_10357,Enhancers_Liver_10360,Enhancers_Liver_10374,Enhancers_Liver_10781,Enhancers_Liver_11070,Enhancers_Liver_11402,Enhancers_Liver_11793,Enhancers_Liver_118,Enhancers_Liver_12294,Enhancers_Liver_12550,Enhancers_Liver_12826,Enhancers_Liver_13958,Enhancers_Liver_13971,Enhancers_Liver_14079,Enhancers_Liver_14082,Enhancers_Liver_14086,Enhancers_Liver_14091,Enhancers_Liver_14094,Enhan…
GO:0046649	lymphocyte activation	1.55439	336	216.162	2.1e-12	1.47905	167	112.91	8.51e-06	Abl2,Actb,Ada,Adam17,Adam8,Adora2a,Ahr,Arid1b,Arid2,Bid,Blk,Blm,Bmi1,Bmp4,Cbfb,Cblb,Ccdc88b,Ccl5,Cd24a,Cd274,Cd276,Cd3e,Cd59b,Cd79b,Cd83,Cd84,Cd8a,Cdh17,Ceacam10,Chd7,Cracr2a,Ctnnb1,Cxadr,Cxcl12,Cxcr5,Cyrib,Dicer1,Dlg1,Dlg5,Dll1,Dock10,Dtx1,Dusp10,Efnb1,Elf4,Fgr,Foxj1,Foxn1,Foxp1,Fzd8,Gadd45g,Gata3,Gimap1,Gimap5,Gimap5,Gm9774,Gnrh1,Gpr89,H2-Aa,H2-DMb2,H2-Ob,Hdac7,Hells,Hlx,Hmgb1,Hps1,Hsh2d,Icos,I…	Enhancers_Liver_10357,Enhancers_Liver_10360,Enhancers_Liver_10374,Enhancers_Liver_10781,Enhancers_Liver_11402,Enhancers_Liver_11793,Enhancers_Liver_118,Enhancers_Liver_12550,Enhancers_Liver_14139,Enhancers_Liver_14428,Enhancers_Liver_1466,Enhancers_Liver_15163,Enhancers_Liver_15769,Enhancers_Liver_15770,Enhancers_Liver_16468,Enhancers_Liver_16521,Enhancers_Liver_16525,Enhancers_Liver_17420,Enhanc…
GO:0030097	hemopoiesis	1.63216	277	169.714	2.91e-12	1.44885	113	77.993	0.000858	Actb,Acvr2a,Ada,Adam8,Add2,Ahr,Ankrd54,Apcs,Arid1b,Arid2,Bmp4,Cbfb,Ccdc134,Ccl5,Cd24a,Cd34,Cd83,Ceacam10,Csf1,Ctnnb1,Dicer1,Dll1,Dtx1,Dusp10,Epas1,Ets1,Evi2,Fos,Foxj1,Foxn1,Foxp1,Gata3,Gfi1b,Gimap5,Gimap5,Gm49359,Gm49359,Gm9774,Gpr68,Gsk3b,H2-Aa,Hcls1,Hif1a,Hlx,Hmgb1,Ihh,Il10,Il15,Il2rg,Inhba,Inpp4b,Itgb3,Jag1,Jun,Kdr,Kirrel3,Kit,Klf13,Klf4,Lck,Lyl1,Lyn,Meis1,Mknk2,Mtor,Mturn,Myc,Myo1e,Nfkbiz,Not…	Enhancers_Liver_11726,Enhancers_Liver_11729,Enhancers_Liver_11730,Enhancers_Liver_118,Enhancers_Liver_12550,Enhancers_Liver_13838,Enhancers_Liver_14139,Enhancers_Liver_14230,Enhancers_Liver_14231,Enhancers_Liver_14232,Enhancers_Liver_14234,Enhancers_Liver_14235,Enhancers_Liver_14428,Enhancers_Liver_15718,Enhancers_Liver_15725,Enhancers_Liver_15726,Enhancers_Liver_15727,Enhancers_Liver_16468,Enhan…
GO:1903131	mononuclear cell differentiation	1.70333	236	138.552	4.98e-12	1.521	102	67.0609	0.000345	Abl2,Actb,Ada,Adam17,Adam8,Ahr,Apcs,Arid1b,Arid2,Blk,Blm,Bmp4,Cbfb,Cd24a,Cd79b,Cd83,Cd8a,Cdh17,Chd7,Cracr2a,Csf1,Csf2,Ctnnb1,Dicer1,Dll1,Dock10,Dtx1,Dusp10,Foxj1,Foxn1,Foxp1,Fzd8,Gadd45g,Gata3,Gimap1,Gimap5,Gimap5,Gm9774,Gpr68,Gpr89,H2-Aa,Hdac7,Hells,Hlx,Hmgb1,Ifi203,Ighg1,Ihh,Il10,Il15,Il2rg,Irf8,Itgb6,Itm2a,Jmjd6,Jun,Kit,Lck,Lyl1,Lyn,Mertk,Mr1,Ms4a1,Myc,Ncor1,Nfatc1,Nfkbiz,Nhej1,Nkx2-3,Notch2,O…	Enhancers_Liver_118,Enhancers_Liver_12550,Enhancers_Liver_12826,Enhancers_Liver_14139,Enhancers_Liver_15769,Enhancers_Liver_15770,Enhancers_Liver_16468,Enhancers_Liver_16521,Enhancers_Liver_16525,Enhancers_Liver_17420,Enhancers_Liver_17813,Enhancers_Liver_17814,Enhancers_Liver_17836,Enhancers_Liver_17851,Enhancers_Liver_17857,Enhancers_Liver_17860,Enhancers_Liver_17861,Enhancers_Liver_17862,Enhan…
GO:0002521	leukocyte differentiation	1.61387	282	174.735	5.38e-12	1.46906	128	87.1303	0.000188	Abl2,Actb,Ada,Adam17,Adam8,Ahr,Apcs,Arid1b,Arid2,Blk,Blm,Bmp4,Calcr,Cbfb,Ccl5,Cd24a,Cd79b,Cd83,Cd8a,Cdh17,Ceacam10,Chd7,Cracr2a,Csf1,Csf2,Ctnnb1,Dicer1,Dll1,Dock10,Dtx1,Dusp10,Evi2,Fos,Foxj1,Foxn1,Foxp1,Fzd8,Gab2,Gadd45g,Gata3,Gfi1b,Gimap1,Gimap5,Gimap5,Glo1,Gm9774,Gpr68,Gpr89,Gsk3b,H2-Aa,Hcls1,Hdac7,Hells,Hlx,Hmgb1,Ifi203,Ighg1,Ihh,Il10,Il15,Il2rg,Inpp4b,Irf8,Itgb3,Itgb6,Itm2a,Jmjd6,Jun,Kit,L3mb…	Enhancers_Liver_118,Enhancers_Liver_12550,Enhancers_Liver_12826,Enhancers_Liver_14139,Enhancers_Liver_14230,Enhancers_Liver_14231,Enhancers_Liver_14232,Enhancers_Liver_14234,Enhancers_Liver_14235,Enhancers_Liver_14428,Enhancers_Liver_15718,Enhancers_Liver_15725,Enhancers_Liver_15726,Enhancers_Liver_15727,Enhancers_Liver_15769,Enhancers_Liver_15770,Enhancers_Liver_16468,Enhancers_Liver_16521,Enhan…
GO:0150115	cell-substrate junction organization	2.47903	89	35.9012	2.63e-11	2.06376	33	15.9902	0.000898	Actn1,Arf6,Arhgap6,Bcas3,Clasp1,Coro2b,Dlc1,Efna5,Enpp2,Epb41l5,Epha3,Fermt2,Fmn1,Grem1,Itga2,Itgav,Itgb3,Kdr,Lims1,Lrp1,Mapre2,Nrp1,Pik3r1,Ppm1f,Pten,Ptk2b,Ptprk,Pxn,Smad3,Sorbs1,Tek,Tns1,Vegfa	Enhancers_Liver_11070,Enhancers_Liver_14546,Enhancers_Liver_14555,Enhancers_Liver_14568,Enhancers_Liver_14571,Enhancers_Liver_14572,Enhancers_Liver_15718,Enhancers_Liver_15725,Enhancers_Liver_15726,Enhancers_Liver_15727,Enhancers_Liver_18458,Enhancers_Liver_1867,Enhancers_Liver_1873,Enhancers_Liver_1883,Enhancers_Liver_1884,Enhancers_Liver_1923,Enhancers_Liver_19259,Enhancers_Liver_19274,Enhancer…
GO:0030098	lymphocyte differentiation	1.71728	216	125.78	3.21e-11	1.51143	91	60.208	0.000956	Abl2,Actb,Ada,Adam17,Adam8,Ahr,Arid1b,Arid2,Blm,Bmp4,Cbfb,Cd24a,Cd79b,Cd83,Cd8a,Cdh17,Chd7,Cracr2a,Ctnnb1,Dicer1,Dll1,Dock10,Dtx1,Dusp10,Foxj1,Foxn1,Foxp1,Fzd8,Gadd45g,Gata3,Gimap1,Gimap5,Gimap5,Gm9774,Gpr89,H2-Aa,Hdac7,Hells,Hlx,Hmgb1,Ighg1,Ihh,Il10,Il15,Il2rg,Irf8,Itm2a,Jmjd6,Kit,Lck,Lyl1,Mertk,Mr1,Ms4a1,Ncor1,Nfatc1,Nfkbiz,Nhej1,Nkx2-3,Notch2,Onecut1,Pbrm1,Pbx1,Pik3r1,Plcl2,Pou2f2,Prdm1,Prex1,…	Enhancers_Liver_118,Enhancers_Liver_12550,Enhancers_Liver_14139,Enhancers_Liver_15769,Enhancers_Liver_15770,Enhancers_Liver_16468,Enhancers_Liver_16521,Enhancers_Liver_16525,Enhancers_Liver_17420,Enhancers_Liver_17813,Enhancers_Liver_17814,Enhancers_Liver_17836,Enhancers_Liver_17851,Enhancers_Liver_17857,Enhancers_Liver_17860,Enhancers_Liver_17861,Enhancers_Liver_17862,Enhancers_Liver_17867,Enhan…
GO:0051591	response to cAMP	2.86647	68	23.7226	3.34e-11	2.15044	20	9.30042	0.00902	Ahr,Aqp1,Cdo1,Crem,Fdx1,Gm45837,Igfbp5,Inpp5k,Itpr1,Itpr2,Kcnq1,Ndufs4,Pik3cg,Pik3r1,Rap1a,Rapgef1,Rapgef2,Rapgef3,Slc8a3,Zfp36l1	Enhancers_Liver_13882,Enhancers_Liver_13891,Enhancers_Liver_17658,Enhancers_Liver_17813,Enhancers_Liver_17814,Enhancers_Liver_17836,Enhancers_Liver_17851,Enhancers_Liver_17857,Enhancers_Liver_17860,Enhancers_Liver_17861,Enhancers_Liver_17862,Enhancers_Liver_17867,Enhancers_Liver_17869,Enhancers_Liver_1851,Enhancers_Liver_1854,Enhancers_Liver_1855,Enhancers_Liver_19108,Enhancers_Liver_19119,Enhanc…
GO:0046683	response to organophosphorus	2.56085	82	32.0206	3.79e-11	2.04292	29	14.1954	0.0024	Abcc9,Ahr,Aqp1,Asph,Cdo1,Crem,Fdx1,Gm45837,Igfbp5,Il1b,Inpp5k,Itpr1,Itpr2,Kcnq1,Ndufs4,P2ry6,Pik3cg,Pik3r1,Rap1a,Rapgef1,Rapgef2,Rapgef3,Ryr1,Sell,Slc6a4,Slc8a3,Ssh1,Trpc3,Zfp36l1	Enhancers_Liver_13882,Enhancers_Liver_13891,Enhancers_Liver_14005,Enhancers_Liver_17658,Enhancers_Liver_17813,Enhancers_Liver_17814,Enhancers_Liver_17836,Enhancers_Liver_17851,Enhancers_Liver_17857,Enhancers_Liver_17860,Enhancers_Liver_17861,Enhancers_Liver_17862,Enhancers_Liver_17867,Enhancers_Liver_17869,Enhancers_Liver_1851,Enhancers_Liver_1854,Enhancers_Liver_1855,Enhancers_Liver_19108,Enhanc…
GO:0007015	actin filament organization	1.64981	240	145.472	4.71e-11	1.72862	121	69.9979	1.03e-07	Abl2,Actc1,Actn1,Actn4,Add2,Arap1,Arf6,Arhgap18,Arhgap25,Arhgap6,Arhgef10,Arhgef2,Arhgef5,Arrb1,Baiap2l1,Bcar1,C9orf72,Catip,Cdc42,Cdc42ep2,Clasp1,Coro2b,Coro6,Cul3,Cyrib,Daam2,Dbn1,Dlc1,Dlg1,Dstn,Elmo1,Elmo2,Ermn,Evl,Fam171a1,Fat1,Fchsd2,Fermt2,Fmn1,Fscn1,Gas2l3,Ghsr,Hcls1,Hip1,Hmcn1,Inpp5k,Inppl1,Iqgap2,Kank1,Lcp1,Lmod3,Map3k1,Mical2,Mical3,Mprip,Mtor,Myh10,Myo15,Myo1b,Myo1e,Myo1h,Myo5a,Myo5b,M…	Enhancers_Liver_10357,Enhancers_Liver_10360,Enhancers_Liver_10374,Enhancers_Liver_13004,Enhancers_Liver_13092,Enhancers_Liver_13436,Enhancers_Liver_13882,Enhancers_Liver_13891,Enhancers_Liver_14030,Enhancers_Liver_14031,Enhancers_Liver_14040,Enhancers_Liver_14041,Enhancers_Liver_14054,Enhancers_Liver_15818,Enhancers_Liver_15825,Enhancers_Liver_18458,Enhancers_Liver_19259,Enhancers_Liver_19274,Enh…
GO:0042454	ribonucleoside catabolic process	7.00463	25	3.56907	5.03e-11	3.26867	8	2.44748	0.017	Ada,Ahcy,Cda,Cdadc1,Enpp4,Uox,Upp2,Xdh	Enhancers_Liver_27157,Enhancers_Liver_27158,Enhancers_Liver_27159,Enhancers_Liver_37735,Enhancers_Liver_37737,Enhancers_Liver_38741,Enhancers_Liver_38755,Enhancers_Liver_38762,Enhancers_Liver_38764,Enhancers_Liver_38765,Enhancers_Liver_48326,Enhancers_Liver_48330,Enhancers_Liver_51857,Enhancers_Liver_51858,Enhancers_Liver_51861,Enhancers_Liver_51865,Enhancers_Liver_51868,Enhancers_Liver_52320,Enh…
GO:0002684	positive regulation of immune system process	1.49154	340	227.953	1.03e-10	1.4179	183	129.064	2.95e-05	Abl2,Acod1,Actb,Ada,Adam17,Adam8,Adora3,Ano6,Apcs,App,Arid1b,Arid2,Bcar1,Blk,Blm,Bmi1,Bmx,C3,C9,Cadm1,Cbfb,Cblb,Ccdc88b,Ccl5,Cd226,Cd247,Cd24a,Cd274,Cd276,Cd3e,Cd59b,Cd79b,Cd83,Cd84,Cd8a,Ceacam10,Colec10,Cr1l,Crp,Csf1,Ctsc,Cxcl12,Cxcl17,Cyrib,Dapk2,Dgkz,Dusp10,Edn1,Efnb1,Eif2b2,Evi2,Fgr,Fos,Foxf1,Foxj1,Foxp1,Fyb,Gab2,Gata3,Gfi1b,Gimap5,Gimap5,Gm36028,Gpi1,Gpld1,Gpr68,Gsk3b,H2-Aa,H2-DMb2,H2-Ob,Hcl…	Enhancers_Liver_10357,Enhancers_Liver_10360,Enhancers_Liver_10374,Enhancers_Liver_10781,Enhancers_Liver_11793,Enhancers_Liver_118,Enhancers_Liver_12294,Enhancers_Liver_12550,Enhancers_Liver_13073,Enhancers_Liver_13588,Enhancers_Liver_13589,Enhancers_Liver_13592,Enhancers_Liver_14079,Enhancers_Liver_14082,Enhancers_Liver_14086,Enhancers_Liver_14091,Enhancers_Liver_14094,Enhancers_Liver_14096,Enhan…
GO:0042110	T cell activation	1.61236	243	150.711	2.64e-10	1.63168	123	75.3824	2.02e-06	Abl2,Actb,Ada,Adam17,Adam8,Adora2a,Arid1b,Arid2,Bid,Blm,Bmi1,Bmp4,Cbfb,Cblb,Ccdc88b,Ccl5,Cd24a,Cd274,Cd276,Cd3e,Cd59b,Cd83,Cd84,Cd8a,Ceacam10,Chd7,Cracr2a,Ctnnb1,Cxadr,Cxcl12,Cyrib,Dicer1,Dlg1,Dlg5,Dtx1,Dusp10,Efnb1,Elf4,Foxj1,Foxn1,Foxp1,Fzd8,Gadd45g,Gata3,Gimap1,Gimap5,Gimap5,Gm9774,Gnrh1,Gpr89,H2-Aa,H2-DMb2,H2-Ob,Hlx,Hmgb1,Hsh2d,Icos,Ifnar1,Igfbp2,Ihh,Il15,Il1a,Il1b,Il2rg,Itgal,Itgav,Jaml,Jmjd…	Enhancers_Liver_10357,Enhancers_Liver_10360,Enhancers_Liver_10374,Enhancers_Liver_11793,Enhancers_Liver_118,Enhancers_Liver_12550,Enhancers_Liver_14139,Enhancers_Liver_14428,Enhancers_Liver_1466,Enhancers_Liver_16468,Enhancers_Liver_16521,Enhancers_Liver_16525,Enhancers_Liver_17420,Enhancers_Liver_18498,Enhancers_Liver_1851,Enhancers_Liver_1854,Enhancers_Liver_1855,Enhancers_Liver_19108,Enhancers…
GO:0001889	liver development	2.62939	67	25.4812	1.49e-09	1.9877	24	12.0742	0.00958	Ada,Ahr,Arf6,Cadm1,Cdk5rap3,Gm28047,Hlx,Hmbs,Hnf1b,Igf2r,Itpr1,Jarid2,Jun,Man2a1,Mrtfb,Notch2,Onecut1,Onecut2,Rhbdd3,Runx1,Smad3,Sp3,Tgfbr3,Upb1	Enhancers_Liver_11402,Enhancers_Liver_14449,Enhancers_Liver_15259,Enhancers_Liver_17813,Enhancers_Liver_17814,Enhancers_Liver_17836,Enhancers_Liver_17851,Enhancers_Liver_17857,Enhancers_Liver_17860,Enhancers_Liver_17861,Enhancers_Liver_17862,Enhancers_Liver_17867,Enhancers_Liver_17869,Enhancers_Liver_18458,Enhancers_Liver_22254,Enhancers_Liver_22255,Enhancers_Liver_22265,Enhancers_Liver_22270,Enh…
GO:0014074	response to purine-containing compound	2.26438	88	38.8627	2.26e-09	1.98455	34	17.1324	0.00146	Abcc9,Ada,Adora2a,Ahr,Aqp1,Asph,Cdo1,Crem,Fdx1,Gm45837,Igfbp5,Il1b,Inpp5k,Itpr1,Itpr2,Kcnq1,Ndufs4,P2ry1,P2ry6,Pik3cg,Pik3r1,Prss1,Rap1a,Rapgef1,Rapgef2,Rapgef3,Ryr1,Sell,Slc6a1,Slc6a4,Slc8a3,Ssh1,Trpc3,Zfp36l1	Enhancers_Liver_13882,Enhancers_Liver_13891,Enhancers_Liver_14005,Enhancers_Liver_17658,Enhancers_Liver_17813,Enhancers_Liver_17814,Enhancers_Liver_17836,Enhancers_Liver_17851,Enhancers_Liver_17857,Enhancers_Liver_17860,Enhancers_Liver_17861,Enhancers_Liver_17862,Enhancers_Liver_17867,Enhancers_Liver_17869,Enhancers_Liver_1851,Enhancers_Liver_1854,Enhancers_Liver_1855,Enhancers_Liver_19108,Enhanc…
GO:0046626	regulation of insulin receptor signaling pathway	2.59612	66	25.4226	3.3e-09	2.01706	26	12.8901	0.00532	Ankrd26,Baiap2l1,Gnai2,Grb14,Il1b,Inpp5k,Inppl1,Kank1,Nck1,Nck1,Nr1h4,Nucb2,Nucks1,Ogt,Osbpl8,Pik3r1,Pip4k2a,Prkcd,Prkcq,Ptpn1,Sesn3,Sirt1,Socs1,Sorbs1,Sorl1,Ybx1	Enhancers_Liver_10429,Enhancers_Liver_13882,Enhancers_Liver_13891,Enhancers_Liver_20575,Enhancers_Liver_24238,Enhancers_Liver_24239,Enhancers_Liver_24253,Enhancers_Liver_24258,Enhancers_Liver_24259,Enhancers_Liver_24261,Enhancers_Liver_24265,Enhancers_Liver_24266,Enhancers_Liver_24267,Enhancers_Liver_24277,Enhancers_Liver_24282,Enhancers_Liver_24315,Enhancers_Liver_24323,Enhancers_Liver_24338,Enh…
GO:0009725	response to hormone	1.53299	266	173.517	3.32e-09	1.5569	126	80.93	1.74e-05	Abhd2,Acod1,Acvr1c,Adcy8,Adra1a,Akt2,Akt3,Ankrd26,Aqp1,Arsa,Arsb,Atp1a1,Atp2b1,Bcar1,Bcas3,Bmp4,C2cd5,Cacybp,Calcr,Casp9,Cd24a,Cdo1,Ceacam10,Cpn1,Cry1,Cry1,Cry2,Ctnnb1,Edn1,Ednrb,Efna5,Eif2b2,Epha3,Eprs,Esr1,Fhl2,Foxo1,Gata4,Gclc,Gdnf,Ghsr,Gnai2,Gnrh1,Gpld1,Grb14,Grk2,Gsk3b,Hcls1,Hmgb1,Il10,Il1b,Inhba,Inpp5k,Inppl1,Kank1,Kbtbd2,Kcnq1,Kit,Klf9,Lpin1,Lpl,Lrp2,Lyn,Mapk1,Mettl21c,Mtor,Myo5a,Ncf2,Nck1…	Enhancers_Liver_10167,Enhancers_Liver_10172,Enhancers_Liver_10173,Enhancers_Liver_10174,Enhancers_Liver_10429,Enhancers_Liver_118,Enhancers_Liver_13882,Enhancers_Liver_13891,Enhancers_Liver_14546,Enhancers_Liver_14555,Enhancers_Liver_14568,Enhancers_Liver_14571,Enhancers_Liver_14572,Enhancers_Liver_14943,Enhancers_Liver_16258,Enhancers_Liver_17285,Enhancers_Liver_17286,Enhancers_Liver_17287,Enhan…
GO:0001667	ameboidal-type cell migration	1.48019	292	197.272	1.32e-08	1.74509	125	71.6296	3.67e-08	Acvr1,Acvr1c,Adam17,Adam8,Adamts9,Akt3,Amot,Amotl1,Aqp1,Arf6,Arhgap5,Arid5b,Arsb,Bcar1,Bcas3,Bmp10,Bmp4,Bmper,Capn7,Ccbe1,Ccn3,Cdc42,Cdh2,Ceacam10,Clasp1,Crb2,Cxcl12,Daam2,Dab2ip,Dcn,Ddr2,Dicer1,Dock5,Dusp10,Edn1,Ednrb,Efnb1,Enpp2,Epb41l5,Ets1,Evl,Fgf1,Fgfr1,Fndc3b,Folr1,Foxp1,Fstl1,Gab2,Gata3,Gdnf,Glul,Gna12,Gpi1,Gpld1,Grem1,Hdac7,Hif1a,Hmgb1,Itga2,Itgav,Itgb3,Jcad,Jun,Jup,Kank1,Kdr,Kit,Klf4,Lam…	Enhancers_Liver_10142,Enhancers_Liver_10146,Enhancers_Liver_10545,Enhancers_Liver_118,Enhancers_Liver_12550,Enhancers_Liver_13121,Enhancers_Liver_13122,Enhancers_Liver_14546,Enhancers_Liver_14555,Enhancers_Liver_14568,Enhancers_Liver_14571,Enhancers_Liver_14572,Enhancers_Liver_14943,Enhancers_Liver_1536,Enhancers_Liver_1537,Enhancers_Liver_15453,Enhancers_Liver_1552,Enhancers_Liver_15718,Enhancer…
GO:1903706	regulation of hemopoiesis	1.59567	216	135.366	1.35e-08	1.35852	88	64.7766	0.0192	Actb,Acvr2a,Ada,Adam8,Ankrd54,Apcs,Arid1b,Arid2,Bmp4,Cbfb,Ccl5,Cd24a,Cd83,Ceacam10,Csf1,Ctnnb1,Dicer1,Dll1,Dtx1,Dusp10,Ets1,Evi2,Fos,Foxj1,Foxn1,Foxp1,Gata3,Gfi1b,Gimap5,Gimap5,Gm9774,Gpr68,Gsk3b,H2-Aa,Hcls1,Hif1a,Hlx,Hmgb1,Ihh,Il10,Il15,Il2rg,Inhba,Inpp4b,Itgb3,Jag1,Jun,Klf13,Lck,Lyn,Meis1,Mtor,Mturn,Myc,Nfkbiz,Notch2,Ocstamp,Paf1,Pbrm1,Pik3r1,Pou4f1,Pou4f2,Ppargc1b,Prdm1,Ptk2b,Ptn,Rarg,Rc3h1,Rh…	Enhancers_Liver_11726,Enhancers_Liver_11729,Enhancers_Liver_11730,Enhancers_Liver_118,Enhancers_Liver_12550,Enhancers_Liver_14139,Enhancers_Liver_14230,Enhancers_Liver_14231,Enhancers_Liver_14232,Enhancers_Liver_14234,Enhancers_Liver_14235,Enhancers_Liver_14428,Enhancers_Liver_15718,Enhancers_Liver_15725,Enhancers_Liver_15726,Enhancers_Liver_15727,Enhancers_Liver_16468,Enhancers_Liver_18498,Enhan…
GO:1902107	positive regulation of leukocyte differentiation	1.87722	125	66.5877	1.68e-08	1.60439	50	31.1646	0.00746	Actb,Ada,Adam8,Arid1b,Arid2,Cbfb,Ccl5,Cd83,Csf1,Dusp10,Evi2,Fos,Gata3,Gfi1b,Gimap5,Gimap5,Gpr68,Gsk3b,H2-Aa,Hcls1,Hlx,Hmgb1,Ihh,Il10,Il15,Il2rg,Itgb3,Jun,Lck,Nfkbiz,Notch2,Ocstamp,Pbrm1,Pou4f1,Pou4f2,Ppargc1b,Prdm1,Rhoh,Ripk1,Runx1,Sash3,Slc9b2,Socs1,Syk,Tgfbr2,Tmem64,Tox,Trib1,Zfp36l1,Zmiz1	Enhancers_Liver_118,Enhancers_Liver_12550,Enhancers_Liver_14230,Enhancers_Liver_14231,Enhancers_Liver_14232,Enhancers_Liver_14234,Enhancers_Liver_14235,Enhancers_Liver_14428,Enhancers_Liver_15718,Enhancers_Liver_15725,Enhancers_Liver_15726,Enhancers_Liver_15727,Enhancers_Liver_19108,Enhancers_Liver_19119,Enhancers_Liver_19128,Enhancers_Liver_19144,Enhancers_Liver_19145,Enhancers_Liver_19162,Enhan…
GO:0031032	actomyosin structure organization	1.87875	125	66.5335	1.68e-08	1.77734	58	32.6331	0.000318	Actc1,Akap13,Arap1,Arhgap6,Arhgef10,Arhgef5,Arrb1,Bmp10,Cdc42,Clasp1,Coro2b,Cul3,Dlc1,Edn1,Epb41,Epb41l2,Epb41l5,Evl,Fam171a1,Fermt2,Frmd5,Frmd6,Inpp5k,Lmod3,Mef2a,Mtor,Myh10,Myh9,Myl2,Mylk3,Myo18a,Myom2,Nrp1,Pdgfra,Pdlim1,Pfn2,Phactr1,Pik3r1,Ppm1f,Ppp1r9a,Prkcq,Ptger4,Ptk2b,Pxn,Rapgef3,Rgcc,Rhpn2,S1pr1,Smad3,Sorbs1,Sorbs3,Stmn1,Synpo,Tacr1,Tgfbr1,Tmod1,Ttc8,Wasf2	Enhancers_Liver_13436,Enhancers_Liver_13882,Enhancers_Liver_13891,Enhancers_Liver_14079,Enhancers_Liver_14082,Enhancers_Liver_14086,Enhancers_Liver_14091,Enhancers_Liver_14094,Enhancers_Liver_14096,Enhancers_Liver_18599,Enhancers_Liver_18604,Enhancers_Liver_19984,Enhancers_Liver_19985,Enhancers_Liver_20020,Enhancers_Liver_20023,Enhancers_Liver_20030,Enhancers_Liver_20533,Enhancers_Liver_20536,Enh…
GO:0009164	nucleoside catabolic process	4.31608	30	6.95075	1.75e-08	3.37082	11	3.26331	0.00265	Ada,Ahcy,Cda,Cdadc1,Dera,Dpyd,Enpp4,Uox,Upb1,Upp2,Xdh	Enhancers_Liver_27157,Enhancers_Liver_27158,Enhancers_Liver_27159,Enhancers_Liver_37735,Enhancers_Liver_37737,Enhancers_Liver_38741,Enhancers_Liver_38755,Enhancers_Liver_38762,Enhancers_Liver_38764,Enhancers_Liver_38765,Enhancers_Liver_48326,Enhancers_Liver_48330,Enhancers_Liver_51857,Enhancers_Liver_51858,Enhancers_Liver_51861,Enhancers_Liver_51865,Enhancers_Liver_51868,Enhancers_Liver_52320,Enh…
GO:0006082	organic acid metabolic process	1.43948	317	220.219	2.62e-08	1.21875	174	142.77	0.029	Abcd3,Abcd4,Abcg2,Abhd2,Abhd5,Acaa2,Acad9,Acsl1,Acsl4,Adssl1,Afmid,Agxt2,Ahcy,Akt2,Aldh18a1,Aldh1a3,Aldh3a2,Aldh5a1,Aldh8a1,Amacr,Angptl3,Ank,Ankrd26,App,Asah2,Atp8b1,Auh,Bcat1,Bckdhb,Blmh,Btd,C3,Cbr4,Cdo1,Ceacam10,Ces1c,Ces1c,Ces1c,Ces1e,Ces2b,Ces2b,Cps1,Cs,Cyp26a1,Cyp2c55,Cyp2e1,Cyp2r1,Cyp7b1,Dao,Ddah1,Dhrs9,Dlat,Edn1,Eif2ak3,Eno1,Eno4,Eprs,Erlin1,Erlin2,Fa2h,Fabp1,Fabp1,Fabp5,Fbp1,Fgfr1,Fh1,Fo…	Enhancers_Liver_1,Enhancers_Liver_11064,Enhancers_Liver_11065,Enhancers_Liver_11070,Enhancers_Liver_11089,Enhancers_Liver_11128,Enhancers_Liver_11130,Enhancers_Liver_11138,Enhancers_Liver_11141,Enhancers_Liver_12368,Enhancers_Liver_13073,Enhancers_Liver_13105,Enhancers_Liver_13146,Enhancers_Liver_13147,Enhancers_Liver_13996,Enhancers_Liver_14005,Enhancers_Liver_14059,Enhancers_Liver_14082,Enhance…
GO:1902105	regulation of leukocyte differentiation	1.6574	179	108.001	2.62e-08	1.43977	74	51.3971	0.0109	Actb,Ada,Adam8,Apcs,Arid1b,Arid2,Bmp4,Cbfb,Ccl5,Cd24a,Cd83,Ceacam10,Csf1,Ctnnb1,Dicer1,Dtx1,Dusp10,Evi2,Fos,Foxj1,Foxn1,Foxp1,Gata3,Gfi1b,Gimap5,Gimap5,Gm9774,Gpr68,Gsk3b,H2-Aa,Hcls1,Hlx,Hmgb1,Ihh,Il10,Il15,Il2rg,Inpp4b,Itgb3,Jun,Lck,Lyn,Mtor,Myc,Nfkbiz,Notch2,Ocstamp,Pbrm1,Pik3r1,Pou4f1,Pou4f2,Ppargc1b,Prdm1,Rc3h1,Rhoh,Ripk1,Runx1,Sash3,Sh2b3,Sh3rf1,Slc9b2,Socs1,Sos2,Syk,Tgfbr2,Tmem131l,Tmem178,…	Enhancers_Liver_118,Enhancers_Liver_12550,Enhancers_Liver_14139,Enhancers_Liver_14230,Enhancers_Liver_14231,Enhancers_Liver_14232,Enhancers_Liver_14234,Enhancers_Liver_14235,Enhancers_Liver_14428,Enhancers_Liver_15718,Enhancers_Liver_15725,Enhancers_Liver_15726,Enhancers_Liver_15727,Enhancers_Liver_16468,Enhancers_Liver_18498,Enhancers_Liver_19108,Enhancers_Liver_19119,Enhancers_Liver_19128,Enhan…
GO:0030099	myeloid cell differentiation	1.61701	194	119.974	3.07e-08	1.44206	84	58.25	0.00572	Actn1,Acvr2a,Adam8,Ankrd54,Apcs,Bmp4,Calcr,Cbfb,Ccl5,Cdk5rap3,Cdkn1c,Ceacam10,Cebpg,Csf1,Csf2,Ctnnb1,Dll1,Epas1,Ets1,Evi2,Exoc6,Fech,Fos,Foxp1,Gab2,Gata3,Gfi1b,Gimap5,Gimap5,Glo1,Gpr68,Gsk3b,Hcls1,Hif1a,Hmgb1,Ifi203,Il15,Inhba,Inpp4b,Irf8,Itgb3,Itgb6,Jag1,Jun,Kcnq1,Kit,Klf13,Kmt2e,L3mbtl3,Lyn,Meis1,Mfhas1,Mtor,Mturn,Myc,Myh9,Ncor1,Nfatc1,Nkx2-3,Notch2,Ocstamp,Paf1,Pik3r1,Plcb1,Pou4f1,Pou4f2,Pparg…	Enhancers_Liver_11726,Enhancers_Liver_11729,Enhancers_Liver_11730,Enhancers_Liver_118,Enhancers_Liver_12550,Enhancers_Liver_12826,Enhancers_Liver_14230,Enhancers_Liver_14231,Enhancers_Liver_14232,Enhancers_Liver_14234,Enhancers_Liver_14235,Enhancers_Liver_14428,Enhancers_Liver_15259,Enhancers_Liver_15718,Enhancers_Liver_15725,Enhancers_Liver_15726,Enhancers_Liver_15727,Enhancers_Liver_18787,Enhan…
GO:0010631	epithelial cell migration	1.55949	223	142.995	3.07e-08	1.90672	98	51.3971	2.48e-08	Adam17,Adam8,Adamts9,Akt3,Amot,Amotl1,Aqp1,Arf6,Arhgap5,Arsb,Bcar1,Bcas3,Bmp10,Bmp4,Bmper,Capn7,Ccbe1,Ccn3,Ceacam10,Clasp1,Cxcl12,Daam2,Dab2ip,Dcn,Dicer1,Dock5,Dusp10,Enpp2,Epb41l5,Ets1,Evl,Fgf1,Fgfr1,Foxp1,Fstl1,Gab2,Gata3,Glul,Gpi1,Gpld1,Grem1,Hdac7,Hif1a,Hmgb1,Itga2,Itgav,Itgb3,Jcad,Jun,Jup,Kank1,Kdr,Kit,Klf4,Lcn2,Map2k3,Map2k5,Mapre2,Mtor,Myh9,Nfe2l2,Nr2f2,Nr4a1,Nrp1,Pdcd10,Pecam1,Pfn2,Pik3c2…	Enhancers_Liver_10142,Enhancers_Liver_10146,Enhancers_Liver_10545,Enhancers_Liver_118,Enhancers_Liver_12550,Enhancers_Liver_13121,Enhancers_Liver_13122,Enhancers_Liver_14546,Enhancers_Liver_14555,Enhancers_Liver_14568,Enhancers_Liver_14571,Enhancers_Liver_14572,Enhancers_Liver_15453,Enhancers_Liver_15718,Enhancers_Liver_15725,Enhancers_Liver_15726,Enhancers_Liver_15727,Enhancers_Liver_15818,Enhan…
GO:0032956	regulation of actin cytoskeleton organization	1.6063	198	123.265	3.64e-08	1.6285	93	57.1078	6.62e-05	Add2,Akap13,Arap1,Arf6,Arhgap18,Arhgap6,Arhgef10,Arhgef5,Baiap2l1,Bcas3,Bmp10,C9orf72,Cdc42,Cdc42ep2,Clasp1,Coro2b,Cyrib,Daam2,Dbn1,Dixdc1,Dlc1,Dlg1,Dstn,Edn1,Efna5,Epha3,Evl,Fchsd2,Fermt2,Fgr,Fmn1,Fscn1,Hck,Hcls1,Il1a,Inpp5k,Iqgap2,Itgb3,Jam3,Kank1,Lmod3,Lrp1,Map3k1,Mtor,Mylk3,Nck1,Nck1,Nck2,Notch2,Nrp1,Ntf3,Pecam1,Pfn2,Pik3r1,Ppm1f,Ppp1r9a,Prkcd,Prkce,Prkcq,Ptger4,Ptk2b,Pxn,Rapgef3,Rdx,Rgcc,Rho…	Enhancers_Liver_11070,Enhancers_Liver_13882,Enhancers_Liver_13891,Enhancers_Liver_14030,Enhancers_Liver_14031,Enhancers_Liver_14040,Enhancers_Liver_14041,Enhancers_Liver_14054,Enhancers_Liver_14546,Enhancers_Liver_14555,Enhancers_Liver_14568,Enhancers_Liver_14571,Enhancers_Liver_14572,Enhancers_Liver_15718,Enhancers_Liver_15725,Enhancers_Liver_15726,Enhancers_Liver_15727,Enhancers_Liver_15818,Enh…
GO:0001816	cytokine production	1.44128	302	209.536	5.58e-08	1.35322	155	114.542	0.00117	Abl2,Ackr1,Acod1,Adam17,Adam8,Anxa4,App,Arfgef2,Arhgef2,Arrb1,Ash1l,Atg12,Atg5,Atp2b1,Atp6ap2,Bcl6b,C1qtnf3,C3,Cadm1,Ccbe1,Ccdc88b,Ccl5,Ccm2l,Cd226,Cd247,Cd24a,Cd274,Cd276,Cd34,Cd3e,Cd59b,Cd83,Cd84,Ceacam10,Cebpg,Clec9a,Crp,Csf2,Cxcl17,Cyrib,Dicer1,Dlg1,Dll1,Eif2ak3,F2r,Fgfr1,Fgr,Foxj1,Foxp1,Furin,Gadd45g,Gata3,Gata4,Ghsr,Gimap5,Gimap5,Git1,Gm36028,Grk2,Hdac7,Hif1a,Hmgb1,Ifi203,Ifnar1,Il10,Il15,I…	Enhancers_Liver_10142,Enhancers_Liver_10146,Enhancers_Liver_10167,Enhancers_Liver_10172,Enhancers_Liver_10173,Enhancers_Liver_10174,Enhancers_Liver_10357,Enhancers_Liver_10360,Enhancers_Liver_10374,Enhancers_Liver_10781,Enhancers_Liver_11070,Enhancers_Liver_11793,Enhancers_Liver_118,Enhancers_Liver_12294,Enhancers_Liver_12550,Enhancers_Liver_12826,Enhancers_Liver_13121,Enhancers_Liver_13122,Enhan…
GO:0007044	cell-substrate junction assembly	2.28114	73	32.0016	5.62e-08	1.99851	30	15.0112	0.0027	Actn1,Arhgap6,Bcas3,Clasp1,Coro2b,Dlc1,Efna5,Enpp2,Epb41l5,Epha3,Fermt2,Fmn1,Grem1,Itga2,Itgav,Itgb3,Kdr,Lims1,Lrp1,Nrp1,Ppm1f,Pten,Ptk2b,Ptprk,Pxn,Smad3,Sorbs1,Tek,Tns1,Vegfa	Enhancers_Liver_11070,Enhancers_Liver_14546,Enhancers_Liver_14555,Enhancers_Liver_14568,Enhancers_Liver_14571,Enhancers_Liver_14572,Enhancers_Liver_15718,Enhancers_Liver_15725,Enhancers_Liver_15726,Enhancers_Liver_15727,Enhancers_Liver_1867,Enhancers_Liver_1873,Enhancers_Liver_1883,Enhancers_Liver_1884,Enhancers_Liver_1923,Enhancers_Liver_19259,Enhancers_Liver_19274,Enhancers_Liver_19276,Enhancer…
GO:0032868	response to insulin	1.85493	120	64.6924	7.07e-08	1.75547	57	32.4699	0.000481	Acvr1c,Akt2,Akt3,Ankrd26,Atp2b1,C2cd5,Ceacam10,Cry1,Cry1,Cry2,Eprs,Foxo1,Ghsr,Gnai2,Gpld1,Grb14,Grk2,Il1b,Inpp5k,Inppl1,Kank1,Kbtbd2,Kcnq1,Lpin1,Lpl,Mtor,Myo5a,Nck1,Nck1,Ncoa2,Nr1h4,Nucb2,Nucks1,Ogt,Osbpl8,Pik3r1,Pip4k2a,Pou4f2,Ppara,Prkcd,Prkci,Prkcq,Pten,Rab12,Rbp4,Sesn3,Sirt1,Socs1,Sorbs1,Sorl1,Sort1,Stxbp3,Tbc1d4,Vps13c,Wdtc1,Ybx1,Zfp36l1	Enhancers_Liver_10167,Enhancers_Liver_10172,Enhancers_Liver_10173,Enhancers_Liver_10174,Enhancers_Liver_10429,Enhancers_Liver_118,Enhancers_Liver_13882,Enhancers_Liver_13891,Enhancers_Liver_14943,Enhancers_Liver_17285,Enhancers_Liver_17286,Enhancers_Liver_17287,Enhancers_Liver_19108,Enhancers_Liver_19119,Enhancers_Liver_19128,Enhancers_Liver_19144,Enhancers_Liver_19145,Enhancers_Liver_19162,Enhan…
GO:0001776	leukocyte homeostasis	2.46627	61	24.7337	7.07e-08	1.89159	25	13.2164	0.0141	Ahr,Bak1,Bcl2l11,Ccnb2,Csf1,Dock10,F2r,Foxn1,Gimap5,Gimap5,Hif1a,Jam3,Lyn,Mthfd1,Nkx2-3,Pde4b,Rc3h1,Sash3,Sh2b3,Skil,Slc40a1,Sos2,Spns2,Tnfaip3,Tnfrsf17	Enhancers_Liver_13657,Enhancers_Liver_13666,Enhancers_Liver_13671,Enhancers_Liver_13672,Enhancers_Liver_14139,Enhancers_Liver_17813,Enhancers_Liver_17814,Enhancers_Liver_17836,Enhancers_Liver_17851,Enhancers_Liver_17857,Enhancers_Liver_17860,Enhancers_Liver_17861,Enhancers_Liver_17862,Enhancers_Liver_17867,Enhancers_Liver_17869,Enhancers_Liver_18498,Enhancers_Liver_18787,Enhancers_Liver_18795,Enh…
GO:0010634	positive regulation of epithelial cell migration	1.75982	137	77.849	8.07e-08	2.16749	58	26.7591	7.38e-07	Adam17,Akt3,Amot,Amotl1,Aqp1,Arf6,Arhgap5,Bcar1,Bcas3,Bmp4,Capn7,Ccbe1,Clasp1,Dicer1,Dock5,Enpp2,Epb41l5,Ets1,Fgf1,Fgfr1,Foxp1,Gab2,Gata3,Gpi1,Gpld1,Hdac7,Hif1a,Hmgb1,Itga2,Itgb3,Jcad,Jun,Kdr,Lcn2,Map2k3,Mapre2,Mtor,Nfe2l2,Nrp1,Pik3c2a,Pik3cg,Plk2,Plpp3,Ppm1f,Prkce,Ptk2b,Rab11a,Rhoj,Rin2,Sash1,Sirt1,Sox9,Tacr1,Tek,Tgfb2,Tgfbr2,Vegfa,Vegfc	Enhancers_Liver_118,Enhancers_Liver_13121,Enhancers_Liver_13122,Enhancers_Liver_14546,Enhancers_Liver_14555,Enhancers_Liver_14568,Enhancers_Liver_14571,Enhancers_Liver_14572,Enhancers_Liver_15718,Enhancers_Liver_15725,Enhancers_Liver_15726,Enhancers_Liver_15727,Enhancers_Liver_16245,Enhancers_Liver_16258,Enhancers_Liver_17420,Enhancers_Liver_17658,Enhancers_Liver_18209,Enhancers_Liver_18458,Enhan…
GO:0008286	insulin receptor signaling pathway	2.1231	84	39.5647	8.07e-08	1.91217	39	20.3957	0.00113	Akt2,Ankrd26,Baiap2l1,Bcar1,Bcar3,C2cd5,Foxo1,Gnai2,Gpld1,Grb14,Gsk3b,Il1b,Inpp5k,Inppl1,Kank1,Nck1,Nck1,Ndel1,Nr1h4,Nucb2,Nucks1,Ogt,Osbpl8,Pdk4,Phip,Pik3r1,Pik3r3,Pip4k2a,Plcb1,Prkcd,Prkcq,Ptpn1,Sesn3,Sirt1,Socs1,Sorbs1,Sorl1,Srebf1,Ybx1	Enhancers_Liver_10429,Enhancers_Liver_13073,Enhancers_Liver_13436,Enhancers_Liver_13438,Enhancers_Liver_13442,Enhancers_Liver_13882,Enhancers_Liver_13891,Enhancers_Liver_20575,Enhancers_Liver_21457,Enhancers_Liver_24238,Enhancers_Liver_24239,Enhancers_Liver_24253,Enhancers_Liver_24258,Enhancers_Liver_24259,Enhancers_Liver_24261,Enhancers_Liver_24265,Enhancers_Liver_24266,Enhancers_Liver_24267,Enh…
GO:0030183	B cell differentiation	2.03873	91	44.6356	8.16e-08	1.56782	33	21.0483	0.0452	Ada,Adam17,Ahr,Cd24a,Cd79b,Cdh17,Dll1,Dock10,Foxp1,Gimap1,Hdac7,Ighg1,Il10,Il2rg,Irf8,Itm2a,Kit,Lyl1,Ms4a1,Nfatc1,Nhej1,Nkx2-3,Notch2,Onecut1,Pik3r1,Plcl2,Pou2f2,Prdm1,Ptk2b,Sp3,Syk,Tnfaip3,Zfp36l1	Enhancers_Liver_15769,Enhancers_Liver_15770,Enhancers_Liver_17420,Enhancers_Liver_17813,Enhancers_Liver_17814,Enhancers_Liver_17836,Enhancers_Liver_17851,Enhancers_Liver_17857,Enhancers_Liver_17860,Enhancers_Liver_17861,Enhancers_Liver_17862,Enhancers_Liver_17867,Enhancers_Liver_17869,Enhancers_Liver_19108,Enhancers_Liver_19119,Enhancers_Liver_19128,Enhancers_Liver_19144,Enhancers_Liver_19145,Enh…
GO:0050900	leukocyte migration	1.65806	166	100.117	1.01e-07	1.55479	86	55.313	0.00062	Abl2,Abr,Ada,Adam17,Adam8,Add2,Adora3,Aimp1,Ano6,App,Arhgef5,Asb2,B4galt1,Cadm1,Ccl5,Ccn3,Cd24a,Cd34,Cdc42,Chst2,Csf1,Cxadr,Cxcl12,Cxcl17,Cxcr3,Cxcr5,Cyp7b1,Dapk2,Dusp1,Edn1,Ednrb,Foxj1,Gata3,Grem1,Hmgb1,Hrh1,Hsd3b7,Il16,Il17b,Il1a,Il1b,Il1r1,Itga2,Itga9,Itgal,Itgb3,Itgb7,Jam2,Jam3,Jaml,Kit,Lrch1,Lyn,Mapk1,Msn,Mtus1,Nkx2-3,Padi2,Pawr,Pde4b,Pecam1,Pik3r1,Plcb1,Prex1,Ptger4,Ptk2b,Ptn,Rhoh,Ripor2,S1…	Enhancers_Liver_10357,Enhancers_Liver_10360,Enhancers_Liver_10374,Enhancers_Liver_118,Enhancers_Liver_12262,Enhancers_Liver_12550,Enhancers_Liver_13657,Enhancers_Liver_13666,Enhancers_Liver_13671,Enhancers_Liver_13672,Enhancers_Liver_13958,Enhancers_Liver_13971,Enhancers_Liver_14428,Enhancers_Liver_15718,Enhancers_Liver_15725,Enhancers_Liver_15726,Enhancers_Liver_15727,Enhancers_Liver_15818,Enhan…
GO:0032787	monocarboxylic acid metabolic process	1.53747	214	139.19	1.52e-07	1.30703	119	91.0462	0.0155	Abcd3,Abcd4,Abhd2,Abhd5,Acaa2,Acad9,Acsl1,Acsl4,Agxt2,Akt2,Aldh1a3,Aldh3a2,Aldh5a1,Aldh8a1,Amacr,Angptl3,Ankrd26,App,Asah2,Atp8b1,Auh,Btd,C3,Cbr4,Ceacam10,Ces1c,Ces1c,Ces1c,Ces1e,Ces2b,Ces2b,Cyp26a1,Cyp2c55,Cyp2e1,Cyp7b1,Dhrs9,Dlat,Edn1,Eif2ak3,Eno1,Eno4,Erlin1,Erlin2,Fa2h,Fabp1,Fabp1,Fabp5,Fbp1,Gad1,Ghsr,Git1,Glo1,Gm20431,Gpi1,Hif1a,Hk2,Hk3,Hpgd,Hpgds,Il1b,Kit,Kynu,Ldha,Ldhd,Lipe,Lipg,Liph,Lonp2…	Enhancers_Liver_1,Enhancers_Liver_11089,Enhancers_Liver_13073,Enhancers_Liver_13146,Enhancers_Liver_13147,Enhancers_Liver_14059,Enhancers_Liver_1624,Enhancers_Liver_16245,Enhancers_Liver_16258,Enhancers_Liver_17285,Enhancers_Liver_17286,Enhancers_Liver_17287,Enhancers_Liver_17658,Enhancers_Liver_18787,Enhancers_Liver_18795,Enhancers_Liver_18829,Enhancers_Liver_18833,Enhancers_Liver_18836,Enhancer…
GO:0071320	cellular response to cAMP	2.67008	50	18.726	1.66e-07	2.58053	16	6.20028	0.00405	Ahr,Aqp1,Fdx1,Gm45837,Igfbp5,Inpp5k,Itpr1,Itpr2,Kcnq1,Pik3cg,Rap1a,Rapgef1,Rapgef2,Rapgef3,Slc8a3,Zfp36l1	Enhancers_Liver_13882,Enhancers_Liver_13891,Enhancers_Liver_17658,Enhancers_Liver_17813,Enhancers_Liver_17814,Enhancers_Liver_17836,Enhancers_Liver_17851,Enhancers_Liver_17857,Enhancers_Liver_17860,Enhancers_Liver_17861,Enhancers_Liver_17862,Enhancers_Liver_17867,Enhancers_Liver_17869,Enhancers_Liver_1851,Enhancers_Liver_1854,Enhancers_Liver_1855,Enhancers_Liver_19108,Enhancers_Liver_19119,Enhanc…
GO:0043436	oxoacid metabolic process	1.41587	304	214.71	1.93e-07	1.21141	169	139.506	0.0377	Abcd3,Abcd4,Abhd2,Abhd5,Acaa2,Acad9,Acsl1,Acsl4,Adssl1,Afmid,Agxt2,Ahcy,Akt2,Aldh18a1,Aldh1a3,Aldh3a2,Aldh5a1,Aldh8a1,Amacr,Angptl3,Ank,Ankrd26,App,Asah2,Atp8b1,Auh,Bcat1,Bckdhb,Blmh,Btd,C3,Cbr4,Cdo1,Ceacam10,Ces1c,Ces1c,Ces1c,Ces1e,Ces2b,Ces2b,Cps1,Cs,Cyp26a1,Cyp2c55,Cyp2e1,Cyp7b1,Dao,Ddah1,Dhrs9,Dlat,Edn1,Eif2ak3,Eno1,Eno4,Eprs,Erlin1,Erlin2,Fa2h,Fabp1,Fabp1,Fabp5,Fbp1,Fgfr1,Fh1,Folr1,Gad1,Gadl…	Enhancers_Liver_1,Enhancers_Liver_11064,Enhancers_Liver_11065,Enhancers_Liver_11070,Enhancers_Liver_11089,Enhancers_Liver_11128,Enhancers_Liver_11130,Enhancers_Liver_11138,Enhancers_Liver_11141,Enhancers_Liver_12368,Enhancers_Liver_13073,Enhancers_Liver_13105,Enhancers_Liver_13146,Enhancers_Liver_13147,Enhancers_Liver_13996,Enhancers_Liver_14005,Enhancers_Liver_14059,Enhancers_Liver_14082,Enhance…
GO:0045936	negative regulation of phosphate metabolic process	1.51991	222	146.062	1.94e-07	1.6159	111	68.6926	1.48e-05	Actb,Adora2a,Ahr,Aida,Akap1,Arpp19,Arrb1,Atxn1,Bak1,Birc3,Bmp4,Bod1,C9orf72,Cbl,Cblb,Cda,Cdk5rap3,Cdkn1c,Ceacam10,Chordc1,Cnksr3,Cry2,Ctdspl,Dab2ip,Dbndd2,Ddr2,Dkk1,Dnajc10,Dtnbp1,Dusp1,Dusp10,Dusp16,Dusp6,Fam72a,Fbp1,Fem1al,Gadd45g,Gfra2,Ggnbp2,Git1,Gnai2,Grem1,Grk2,Gsk3b,Gskip,Hmgcr,Ibtk,Il1b,Inpp5k,Inppl1,Jun,Klhl31,Lpin1,Lrp1,Lrp5,Lrp6,Lrrk1,Lyn,Macroh2a1,Mapk8ip1,Mapt,Mfhas1,Mprip,Mtor,Nck1,…	Enhancers_Liver_10194,Enhancers_Liver_10198,Enhancers_Liver_10243,Enhancers_Liver_11070,Enhancers_Liver_12174,Enhancers_Liver_13004,Enhancers_Liver_13882,Enhancers_Liver_13891,Enhancers_Liver_14059,Enhancers_Liver_14515,Enhancers_Liver_14847,Enhancers_Liver_14848,Enhancers_Liver_14849,Enhancers_Liver_14851,Enhancers_Liver_15259,Enhancers_Liver_15688,Enhancers_Liver_15818,Enhancers_Liver_15825,Enh…
GO:1903037	regulation of leukocyte cell-cell adhesion	1.60017	179	111.863	2.03e-07	1.55591	82	52.7024	0.000858	Abl2,Actb,Ada,Adam8,Adora2a,Arid1b,Arid2,Blm,Bmi1,Bmp4,Cbfb,Cblb,Ccdc88b,Ccl5,Cd24a,Cd274,Cd276,Cd3e,Cd59b,Cd83,Ceacam10,Chst2,Cxcl12,Cyrib,Dlg1,Dlg5,Dtx1,Dusp10,Efnb1,Ets1,Foxj1,Gata3,Gimap5,Gimap5,Gnrh1,H2-Aa,H2-DMb2,H2-Ob,Hlx,Hmgb1,Icos,Igfbp2,Ihh,Il15,Il1a,Il1b,Il2rg,Itgal,Klf4,Lck,Mad1l1,Nck1,Nck1,Nck2,Nfkbiz,Nr4a3,Pag1,Pawr,Pbrm1,Peli1,Ppara,Prkcq,Pten,Rc3h1,Rhoh,Ripor2,Runx1,Sash3,Selp,Sla…	Enhancers_Liver_10357,Enhancers_Liver_10360,Enhancers_Liver_10374,Enhancers_Liver_11793,Enhancers_Liver_118,Enhancers_Liver_12550,Enhancers_Liver_14428,Enhancers_Liver_1466,Enhancers_Liver_16468,Enhancers_Liver_1851,Enhancers_Liver_1854,Enhancers_Liver_1855,Enhancers_Liver_2029,Enhancers_Liver_2030,Enhancers_Liver_20575,Enhancers_Liver_21409,Enhancers_Liver_21412,Enhancers_Liver_21417,Enhancers_L…
GO:0043434	response to peptide hormone	1.67413	153	91.3907	2.18e-07	1.58092	73	46.1758	0.00117	Acvr1c,Adcy8,Akt2,Akt3,Ankrd26,Atp2b1,Bcar1,C2cd5,Cacybp,Cdo1,Ceacam10,Cry1,Cry1,Cry2,Ctnnb1,Edn1,Ednrb,Eif2b2,Eprs,Foxo1,Ghsr,Gnai2,Gpld1,Grb14,Grk2,Il1b,Inpp5k,Inppl1,Kank1,Kbtbd2,Kcnq1,Lpin1,Lpl,Mtor,Myo5a,Nck1,Nck1,Ncoa2,Nfe2l2,Nr1h4,Nr4a1,Nr4a3,Nucb2,Nucks1,Ogt,Osbpl8,Pik3r1,Pip4k2a,Plcb1,Pld1,Pou4f2,Ppara,Prkcd,Prkci,Prkcq,Pten,Rab12,Rbp4,Sesn3,Sirt1,Slc24a4,Socs1,Sorbs1,Sorl1,Sort1,Srd5a2,…	Enhancers_Liver_10167,Enhancers_Liver_10172,Enhancers_Liver_10173,Enhancers_Liver_10174,Enhancers_Liver_10429,Enhancers_Liver_118,Enhancers_Liver_13882,Enhancers_Liver_13891,Enhancers_Liver_14943,Enhancers_Liver_17285,Enhancers_Liver_17286,Enhancers_Liver_17287,Enhancers_Liver_19108,Enhancers_Liver_19119,Enhancers_Liver_19128,Enhancers_Liver_19144,Enhancers_Liver_19145,Enhancers_Liver_19162,Enhan…
GO:0007159	leukocyte cell-cell adhesion	1.57404	188	119.438	2.54e-07	1.52363	89	58.4132	0.000886	Abl2,Actb,Ada,Adam8,Add2,Adora2a,Arid1b,Arid2,Blm,Bmi1,Bmp4,Cbfb,Cblb,Ccdc88b,Ccl5,Cd24a,Cd274,Cd276,Cd3e,Cd59b,Cd83,Ceacam10,Chst2,Cxcl12,Cyrib,Dlg1,Dlg5,Dtx1,Dusp10,Efnb1,Ets1,Foxj1,Gata3,Gimap5,Gimap5,Gnrh1,H2-Aa,H2-DMb2,H2-Ob,Hlx,Hmgb1,Icos,Igfbp2,Ihh,Il15,Il1a,Il1b,Il2rg,Itgal,Itgb7,Jam2,Klf4,Lck,Mad1l1,Msn,Nck1,Nck1,Nck2,Nfkbiz,Nr4a3,Pag1,Pawr,Pbrm1,Pecam1,Peli1,Ppara,Prkcq,Pten,Rc3h1,Rhoh,…	Enhancers_Liver_10357,Enhancers_Liver_10360,Enhancers_Liver_10374,Enhancers_Liver_11793,Enhancers_Liver_118,Enhancers_Liver_12262,Enhancers_Liver_12550,Enhancers_Liver_14428,Enhancers_Liver_1466,Enhancers_Liver_15818,Enhancers_Liver_15825,Enhancers_Liver_16468,Enhancers_Liver_1851,Enhancers_Liver_1854,Enhancers_Liver_1855,Enhancers_Liver_2029,Enhancers_Liver_2030,Enhancers_Liver_20575,Enhancers_L…
GO:0051249	regulation of lymphocyte activation	1.51057	220	145.641	2.95e-07	1.4278	106	74.2402	0.00204	Abl2,Actb,Ada,Adam8,Adora2a,Ahr,Arid1b,Arid2,Bid,Blk,Blm,Bmi1,Bmp4,Cbfb,Cblb,Ccdc88b,Ccl5,Cd24a,Cd274,Cd276,Cd3e,Cd59b,Cd83,Ceacam10,Ctnnb1,Cyrib,Dicer1,Dlg1,Dlg5,Dtx1,Dusp10,Efnb1,Fgr,Foxj1,Foxn1,Gata3,Gimap5,Gimap5,Gm9774,Gnrh1,H2-Aa,H2-DMb2,H2-Ob,Hlx,Hmgb1,Hps1,Icos,Igfbp2,Ighg1,Ihh,Il10,Il15,Il1a,Il1b,Il2rg,Itgal,Kmt5b,Lck,Lyn,Mad1l1,Mapk8ip1,Mertk,Nck1,Nck1,Nck2,Nfatc2,Nfkbiz,Pag1,Pagr1b,Paw…	Enhancers_Liver_10357,Enhancers_Liver_10360,Enhancers_Liver_10374,Enhancers_Liver_11402,Enhancers_Liver_11793,Enhancers_Liver_118,Enhancers_Liver_12550,Enhancers_Liver_14139,Enhancers_Liver_14428,Enhancers_Liver_1466,Enhancers_Liver_16468,Enhancers_Liver_17813,Enhancers_Liver_17814,Enhancers_Liver_17836,Enhancers_Liver_17851,Enhancers_Liver_17857,Enhancers_Liver_17860,Enhancers_Liver_17861,Enhanc…
GO:0019752	carboxylic acid metabolic process	1.41446	297	209.974	3.4e-07	1.2053	165	136.896	0.0452	Abcd3,Abcd4,Abhd2,Abhd5,Acaa2,Acad9,Acsl1,Acsl4,Adssl1,Afmid,Agxt2,Ahcy,Akt2,Aldh18a1,Aldh1a3,Aldh3a2,Aldh5a1,Aldh8a1,Amacr,Angptl3,Ankrd26,App,Asah2,Atp8b1,Auh,Bcat1,Bckdhb,Blmh,Btd,C3,Cbr4,Cdo1,Ceacam10,Ces1c,Ces1c,Ces1c,Ces1e,Ces2b,Ces2b,Cps1,Cs,Cyp26a1,Cyp2c55,Cyp2e1,Cyp7b1,Dao,Ddah1,Dhrs9,Dlat,Edn1,Eif2ak3,Eno1,Eno4,Eprs,Erlin1,Erlin2,Fa2h,Fabp1,Fabp1,Fabp5,Fbp1,Fh1,Folr1,Gad1,Gadl1,Gcat,Gcl…	Enhancers_Liver_1,Enhancers_Liver_11064,Enhancers_Liver_11065,Enhancers_Liver_11070,Enhancers_Liver_11089,Enhancers_Liver_11128,Enhancers_Liver_11130,Enhancers_Liver_11138,Enhancers_Liver_11141,Enhancers_Liver_12368,Enhancers_Liver_13073,Enhancers_Liver_13105,Enhancers_Liver_13146,Enhancers_Liver_13147,Enhancers_Liver_13996,Enhancers_Liver_14005,Enhancers_Liver_14059,Enhancers_Liver_14082,Enhance…
GO:0010632	regulation of epithelial cell migration	1.57202	183	116.41	4.59e-07	2.018	81	40.1387	4.36e-08	Adam17,Adamts9,Akt3,Amot,Amotl1,Aqp1,Arf6,Arhgap5,Arsb,Bcar1,Bcas3,Bmp10,Bmp4,Bmper,Capn7,Ccbe1,Ceacam10,Clasp1,Dab2ip,Dcn,Dicer1,Dock5,Dusp10,Enpp2,Epb41l5,Ets1,Evl,Fgf1,Fgfr1,Foxp1,Gab2,Gata3,Glul,Gpi1,Gpld1,Hdac7,Hif1a,Hmgb1,Itga2,Itgb3,Jcad,Jun,Jup,Kdr,Klf4,Lcn2,Map2k3,Map2k5,Mapre2,Mtor,Nfe2l2,Nr2f2,Nrp1,Pdcd10,Pfn2,Pik3c2a,Pik3cg,Plk2,Plpp3,Ppm1f,Prkce,Pten,Ptk2b,Ptprm,Ptprr,Rab11a,Rgcc,Rho…	Enhancers_Liver_10142,Enhancers_Liver_10146,Enhancers_Liver_10545,Enhancers_Liver_118,Enhancers_Liver_13121,Enhancers_Liver_13122,Enhancers_Liver_14546,Enhancers_Liver_14555,Enhancers_Liver_14568,Enhancers_Liver_14571,Enhancers_Liver_14572,Enhancers_Liver_15453,Enhancers_Liver_15718,Enhancers_Liver_15725,Enhancers_Liver_15726,Enhancers_Liver_15727,Enhancers_Liver_16245,Enhancers_Liver_16258,Enhan…
GO:0045639	positive regulation of myeloid cell differentiation	2.06456	80	38.7492	4.96e-07	1.67673	29	17.2955	0.0333	Acvr2a,Ankrd54,Ccl5,Csf1,Ets1,Evi2,Fos,Gfi1b,Gpr68,Gsk3b,Hcls1,Hif1a,Hmgb1,Inhba,Itgb3,Jag1,Jun,Mturn,Notch2,Ocstamp,Pou4f1,Pou4f2,Ppargc1b,Ripk1,Runx1,Slc9b2,Tmem64,Trib1,Zfp36l1	Enhancers_Liver_118,Enhancers_Liver_14230,Enhancers_Liver_14231,Enhancers_Liver_14232,Enhancers_Liver_14234,Enhancers_Liver_14235,Enhancers_Liver_14428,Enhancers_Liver_15718,Enhancers_Liver_15725,Enhancers_Liver_15726,Enhancers_Liver_15727,Enhancers_Liver_18787,Enhancers_Liver_18795,Enhancers_Liver_18829,Enhancers_Liver_18833,Enhancers_Liver_18836,Enhancers_Liver_19108,Enhancers_Liver_19119,Enhan…
GO:0032970	regulation of actin filament-based process	1.50657	214	142.044	5.87e-07	1.61862	103	63.6345	2.89e-05	Add2,Adrb1,Akap13,Ank2,Arap1,Arf6,Arhgap18,Arhgap6,Arhgef10,Arhgef5,Atp1a1,Baiap2l1,Bcas3,Bmp10,C9orf72,Cdc42,Cdc42ep2,Clasp1,Coro2b,Cyrib,Daam2,Dbn1,Dixdc1,Dlc1,Dlg1,Dstn,Edn1,Efna5,Epha3,Evl,Fchsd2,Fermt2,Fgr,Fmn1,Frmd6,Fscn1,Gata4,Gja5,Hck,Hcls1,Il1a,Inpp5k,Iqgap2,Itgb3,Jam3,Jup,Kank1,Lmod3,Lrp1,Map3k1,Mtor,Myh9,Mylk3,Nck1,Nck1,Nck2,Notch2,Nrp1,Ntf3,Pard3,Pde4b,Pecam1,Pfn2,Pik3r1,Ppm1f,Ppp1r9a…	Enhancers_Liver_11070,Enhancers_Liver_13882,Enhancers_Liver_13891,Enhancers_Liver_14030,Enhancers_Liver_14031,Enhancers_Liver_14040,Enhancers_Liver_14041,Enhancers_Liver_14054,Enhancers_Liver_14546,Enhancers_Liver_14555,Enhancers_Liver_14568,Enhancers_Liver_14571,Enhancers_Liver_14572,Enhancers_Liver_15453,Enhancers_Liver_15718,Enhancers_Liver_15725,Enhancers_Liver_15726,Enhancers_Liver_15727,Enh…
GO:0001570	vasculogenesis	1.98728	85	42.772	6.67e-07	2.29828	33	14.3585	0.000135	Ackr3,Amot,Asb4,Cd34,Ceacam10,Ctnnb1,Fgf1,Fgfr1,Fgfr2,Foxf1,Gata4,Gm49359,Gm49359,Hdac7,Kdr,Myo1e,Ntrk2,Pbrm1,Qki,Rap1a,Rapgef2,Rin2,T,Tek,Tgfbr2,Tgfbr3,Tie1,Tiparp,Wars2,Wnt7b,Xdh,Zfp36l1,Zmiz1	Enhancers_Liver_19108,Enhancers_Liver_19119,Enhancers_Liver_19128,Enhancers_Liver_19144,Enhancers_Liver_19145,Enhancers_Liver_19162,Enhancers_Liver_19204,Enhancers_Liver_19220,Enhancers_Liver_22991,Enhancers_Liver_25796,Enhancers_Liver_25797,Enhancers_Liver_25799,Enhancers_Liver_25801,Enhancers_Liver_25822,Enhancers_Liver_25824,Enhancers_Liver_25826,Enhancers_Liver_25839,Enhancers_Liver_25840,Enh…
GO:0062012	regulation of small molecule metabolic process	1.58046	168	106.298	1.21e-06	1.43179	82	57.271	0.00777	Abcg4,Acsl4,Akt2,Ankrd26,App,Arpp19,Atpsckmt,C1qtnf3,Cda,Ceacam10,Ces1c,Ces1c,Ces1c,Ces1e,Cry1,Cry1,Dkk3,Eif2ak3,Eno1,Erlin1,Erlin2,Fabp1,Fabp1,Fabp5,Fbp1,Fdps,Fgf1,Fh1,Foxo1,Ghsr,Git1,Gpld1,H6pd,Hif1a,Hmgb1,Il1b,Inpp5k,Kit,Lacc1,Lmf1,Lonp2,Lpgat1,Malrd1,Mid1ip1,Mtor,Myc,Ncoa2,Ncor1,Nr1h4,Nr3c1,Nr4a3,Nucb2,Ogt,P2ry1,P2ry6,Pank2,Pdk3,Pdk4,Pfkfb1,Ppara,Ppargc1a,Ppp1r3b,Prkce,Ptk2b,Rdh16f2,Rgn,Rora,…	Enhancers_Liver_1,Enhancers_Liver_11089,Enhancers_Liver_11282,Enhancers_Liver_118,Enhancers_Liver_13073,Enhancers_Liver_13882,Enhancers_Liver_13891,Enhancers_Liver_14059,Enhancers_Liver_16245,Enhancers_Liver_16258,Enhancers_Liver_18787,Enhancers_Liver_18795,Enhancers_Liver_18829,Enhancers_Liver_18833,Enhancers_Liver_18836,Enhancers_Liver_21457,Enhancers_Liver_23090,Enhancers_Liver_25356,Enhancers…
GO:1901652	response to peptide	1.5568	178	114.337	1.22e-06	1.56328	88	56.292	0.000433	Acvr1c,Adcy8,Akt2,Akt3,Ankrd26,App,Arhgef2,Atp2b1,Bcar1,C2cd5,Cacybp,Calcr,Cdo1,Ceacam10,Cry1,Cry1,Cry2,Ctnnb1,Edn1,Ednrb,Eif2b2,Eprs,Foxo1,Ghsr,Gnai2,Gpld1,Grb14,Grk2,Grm5,Gsk3b,Il1b,Inpp5k,Inppl1,Irf5,Jag1,Kank1,Kbtbd2,Kcnq1,Lpin1,Lpl,Lrp1,Mtor,Myo5a,Nck1,Nck1,Ncoa2,Nfe2l2,Ngfr,Nlrp1b,Nod1,Nr1h4,Nr4a1,Nr4a3,Nucb2,Nucks1,Ogt,Osbpl8,Pik3r1,Pip4k2a,Plcb1,Pld1,Pou4f2,Ppara,Prkcd,Prkci,Prkcq,Pten,Px…	Enhancers_Liver_10167,Enhancers_Liver_10172,Enhancers_Liver_10173,Enhancers_Liver_10174,Enhancers_Liver_10429,Enhancers_Liver_11070,Enhancers_Liver_118,Enhancers_Liver_13882,Enhancers_Liver_13891,Enhancers_Liver_14943,Enhancers_Liver_15163,Enhancers_Liver_17285,Enhancers_Liver_17286,Enhancers_Liver_17287,Enhancers_Liver_19108,Enhancers_Liver_19119,Enhancers_Liver_19128,Enhancers_Liver_19144,Enhan…
GO:0051248	negative regulation of protein metabolic process	1.32402	388	293.048	1.31e-06	1.2448	196	157.454	0.00882	Actb,Adora2a,Aida,Akap1,Akt2,Apcs,App,Aqp1,Arpp19,Arrb1,Atg5,Bak1,Bcor,Bmp4,Bod1,Btg2,C9orf72,Cbl,Cblb,Cd84,Cdk5rap3,Cdkn1c,Cdyl,Ceacam10,Chordc1,Clec16a,Cnksr3,Crb2,Cry1,Cry1,Cry2,Ctdspl,Ctnnb1,Dab2ip,Dbndd2,Dkk1,Dnajc10,Dtnbp1,Dusp1,Dusp10,Dusp16,Dusp6,Edn1,Ednrb,Eif2ak3,Eif3h,Eif4a3l2,Enc1,Eprs,Fabp1,Fabp1,Fam72a,Fem1al,Fh1,Fmr1,Furin,Gadd45g,Gclc,Gfi1b,Gfra2,Ggnbp2,Gnai2,Gpi1,Grem1,Grk2,Gsk3b…	Enhancers_Liver_10194,Enhancers_Liver_10198,Enhancers_Liver_10243,Enhancers_Liver_11070,Enhancers_Liver_12174,Enhancers_Liver_13004,Enhancers_Liver_13882,Enhancers_Liver_13891,Enhancers_Liver_14515,Enhancers_Liver_14847,Enhancers_Liver_14848,Enhancers_Liver_14849,Enhancers_Liver_14851,Enhancers_Liver_15163,Enhancers_Liver_15259,Enhancers_Liver_15688,Enhancers_Liver_15718,Enhancers_Liver_15725,Enh…
GO:0030155	regulation of cell adhesion	1.32888	381	286.708	1.34e-06	1.50707	180	119.437	8.42e-07	Abi3bp,Abl2,Actb,Actn4,Ada,Adam8,Adora2a,Afdn,Arhgap6,Arid1b,Arid2,Bcar1,Bcas3,Blk,Blm,Bmi1,Bmp4,Cbfb,Cblb,Ccdc88b,Ccl5,Ccm2l,Cd24a,Cd274,Cd276,Cd3e,Cd59b,Cd83,Cdc42,Ceacam10,Chst2,Clasp1,Coro2b,Csf1,Cxcl12,Cxcr3,Cyrib,Cyth3,Cytip,Dbn1,Dicer1,Dlc1,Dlg1,Dlg5,Dll1,Dock5,Dscaml1,Dtx1,Dusp1,Dusp10,Efna5,Efnb1,Egfl6,Enpp2,Epb41l5,Epha3,Ets1,Fermt2,Fmn1,Foxf1,Foxj1,Frmd5,Gata3,Gimap5,Gimap5,Gnrh1,Grem1…	Enhancers_Liver_10357,Enhancers_Liver_10360,Enhancers_Liver_10374,Enhancers_Liver_11070,Enhancers_Liver_11793,Enhancers_Liver_118,Enhancers_Liver_12550,Enhancers_Liver_14428,Enhancers_Liver_14546,Enhancers_Liver_14555,Enhancers_Liver_14568,Enhancers_Liver_14571,Enhancers_Liver_14572,Enhancers_Liver_1466,Enhancers_Liver_14943,Enhancers_Liver_15453,Enhancers_Liver_15718,Enhancers_Liver_15725,Enhanc…
GO:0032870	cellular response to hormone stimulus	1.54102	185	120.051	1.41e-06	1.65084	80	48.4601	0.000168	Acod1,Adcy8,Akt2,Akt3,Ankrd26,Aqp1,Atp1a1,Atp2b1,Bcar1,Bcas3,Bmp4,C2cd5,Casp9,Ceacam10,Ctnnb1,Edn1,Efna5,Epha3,Eprs,Esr1,Foxo1,Gata4,Gdnf,Ghsr,Gnai2,Gpld1,Grb14,Grk2,Gsk3b,Il1b,Inhba,Inpp5k,Inppl1,Kank1,Kit,Klf9,Lpin1,Lpl,Mettl21c,Myo5a,Ncf2,Nck1,Nck1,Ncoa2,Nfe2l2,Npc1,Nr1h4,Nr3c1,Nr4a1,Nr4a3,Nucb2,Nucks1,Ocstamp,Osbpl8,P2ry6,Pik3r1,Pip4k2a,Plcb1,Pou4f2,Ppargc1a,Prkcd,Prkce,Prkci,Prkcq,Pten,Ptger…	Enhancers_Liver_10167,Enhancers_Liver_10172,Enhancers_Liver_10173,Enhancers_Liver_10174,Enhancers_Liver_10429,Enhancers_Liver_118,Enhancers_Liver_13882,Enhancers_Liver_13891,Enhancers_Liver_14546,Enhancers_Liver_14555,Enhancers_Liver_14568,Enhancers_Liver_14571,Enhancers_Liver_14572,Enhancers_Liver_16258,Enhancers_Liver_17285,Enhancers_Liver_17286,Enhancers_Liver_17287,Enhancers_Liver_19108,Enhan…
GO:0001817	regulation of cytokine production	1.42101	263	185.08	1.49e-06	1.33192	138	103.61	0.00442	Abl2,Ackr1,Acod1,Adam17,Adam8,Anxa4,App,Arfgef2,Arhgef2,Arrb1,Atg12,Atg5,Atp2b1,Atp6ap2,Bcl6b,C1qtnf3,C3,Cadm1,Ccbe1,Ccdc88b,Ccl5,Ccm2l,Cd226,Cd24a,Cd274,Cd276,Cd34,Cd3e,Cd59b,Cd83,Cd84,Ceacam10,Cebpg,Clec9a,Crp,Csf2,Cxcl17,Cyrib,Dicer1,Dll1,Eif2ak3,F2r,Fgfr1,Fgr,Foxj1,Foxp1,Furin,Gata3,Gata4,Ghsr,Gimap5,Gimap5,Git1,Gm36028,Grk2,Hdac7,Hif1a,Hmgb1,Ifi203,Ifnar1,Il10,Il15,Il16,Il17b,Il1a,Il1b,Il1r1…	Enhancers_Liver_10142,Enhancers_Liver_10146,Enhancers_Liver_10167,Enhancers_Liver_10172,Enhancers_Liver_10173,Enhancers_Liver_10174,Enhancers_Liver_10781,Enhancers_Liver_11070,Enhancers_Liver_11793,Enhancers_Liver_118,Enhancers_Liver_12550,Enhancers_Liver_12826,Enhancers_Liver_13121,Enhancers_Liver_13122,Enhancers_Liver_13536,Enhancers_Liver_13588,Enhancers_Liver_13589,Enhancers_Liver_13592,Enhan…
GO:0045933	positive regulation of muscle contraction	2.59618	45	17.3332	1.49e-06	2.31531	17	7.34244	0.009	Ace2,Ada,Adra1a,Atp1a1,Edn1,Eno1,F2r,Ghsr,Itga2,Kcnq1,Kit,Lck,Npnt,Pawr,Ptgs1,Spx,Tacr1	Enhancers_Liver_10357,Enhancers_Liver_10360,Enhancers_Liver_10374,Enhancers_Liver_22141,Enhancers_Liver_22160,Enhancers_Liver_23891,Enhancers_Liver_23896,Enhancers_Liver_23897,Enhancers_Liver_23906,Enhancers_Liver_23919,Enhancers_Liver_23921,Enhancers_Liver_24874,Enhancers_Liver_24889,Enhancers_Liver_24902,Enhancers_Liver_27686,Enhancers_Liver_47707,Enhancers_Liver_47711,Enhancers_Liver_47712,Enh…
GO:0032231	regulation of actin filament bundle assembly	2.00048	79	39.4906	1.54e-06	2.13663	38	17.785	0.00016	Arap1,Arhgap6,Arhgef10,Arhgef5,Cdc42,Clasp1,Coro2b,Dbn1,Dlc1,Evl,Fermt2,Inpp5k,Map3k1,Mtor,Nrp1,Pfn2,Pik3r1,Ppm1f,Ppp1r9a,Prkcq,Ptger4,Pxn,Rapgef3,Rdx,Rgcc,Rhpn2,S1pr1,Shank3,Smad3,Sorbs3,Stmn1,Swap70,Synpo,Synpo2,Tacr1,Tgfbr1,Ttc8,Wasf2	Enhancers_Liver_13882,Enhancers_Liver_13891,Enhancers_Liver_19984,Enhancers_Liver_19985,Enhancers_Liver_20020,Enhancers_Liver_20023,Enhancers_Liver_20030,Enhancers_Liver_20533,Enhancers_Liver_20536,Enhancers_Liver_22844,Enhancers_Liver_24238,Enhancers_Liver_24239,Enhancers_Liver_24253,Enhancers_Liver_24258,Enhancers_Liver_24259,Enhancers_Liver_24261,Enhancers_Liver_24265,Enhancers_Liver_24266,Enh…
GO:0051250	negative regulation of lymphocyte activation	1.89733	91	47.9621	1.58e-06	1.73379	43	24.8011	0.00381	Adora2a,Blk,Bmp4,Cbfb,Cblb,Cd24a,Cd274,Cd276,Ceacam10,Dlg1,Dlg5,Dtx1,Fgr,Foxj1,Gimap5,Gimap5,Gnrh1,H2-Aa,Hlx,Hmgb1,Ihh,Il10,Lyn,Mad1l1,Mertk,Pag1,Pawr,Peli1,Prdm1,Pten,Rassf5,Rc3h1,Rhbdd3,Ripor2,Runx1,Socs1,Socs6,Thoc1,Tmem131l,Tnfaip3,Vsig4,Zc3h12d,Zfp608	Enhancers_Liver_10357,Enhancers_Liver_10360,Enhancers_Liver_10374,Enhancers_Liver_11402,Enhancers_Liver_11793,Enhancers_Liver_118,Enhancers_Liver_16468,Enhancers_Liver_2029,Enhancers_Liver_2030,Enhancers_Liver_21409,Enhancers_Liver_21412,Enhancers_Liver_21417,Enhancers_Liver_21420,Enhancers_Liver_25780,Enhancers_Liver_26722,Enhancers_Liver_27392,Enhancers_Liver_27410,Enhancers_Liver_27724,Enhance…
GO:0051493	regulation of cytoskeleton organization	1.42587	252	176.735	2.13e-06	1.45309	124	85.3354	0.000375	Add2,Akap13,Arap1,Arf6,Arhgap18,Arhgap6,Arhgef10,Arhgef2,Arhgef5,Baiap2l1,Bcas3,Bmp10,C9orf72,Ccsap,Cdc42,Cdc42ep2,Chmp4b,Clasp1,Clip3,Coro2b,Cyrib,Daam2,Dbn1,Dixdc1,Dlc1,Dlg1,Dstn,Dyrk1a,Edn1,Efna5,Epha3,Evl,Fchsd2,Fermt2,Fgr,Fmn1,Fscn1,Git1,Gpsm2,Gsk3b,Hck,Hcls1,Il1a,Inpp5k,Iqgap2,Itgb3,Jam3,Kank1,Lmod3,Lrp1,Map3k1,Map9,Mapk1,Mapre2,Mapre3,Mapt,Mark2,Mid1ip1,Mpdz,Mtor,Mycbp2,Mylk3,Nck1,Nck1,Nck…	Enhancers_Liver_10,Enhancers_Liver_11070,Enhancers_Liver_12550,Enhancers_Liver_13882,Enhancers_Liver_13891,Enhancers_Liver_14030,Enhancers_Liver_14031,Enhancers_Liver_14040,Enhancers_Liver_14041,Enhancers_Liver_14054,Enhancers_Liver_14059,Enhancers_Liver_14546,Enhancers_Liver_14555,Enhancers_Liver_14568,Enhancers_Liver_14571,Enhancers_Liver_14572,Enhancers_Liver_15688,Enhancers_Liver_15718,Enhanc…
GO:0150117	positive regulation of cell-substrate junction organization	2.82247	38	13.4634	2.16e-06	2.60008	14	5.38445	0.00768	Arf6,Enpp2,Epb41l5,Fermt2,Fmn1,Kdr,Lims1,Mapre2,Nrp1,Pik3r1,Ppm1f,Smad3,Tek,Vegfa	Enhancers_Liver_18458,Enhancers_Liver_24238,Enhancers_Liver_24239,Enhancers_Liver_24253,Enhancers_Liver_24258,Enhancers_Liver_24259,Enhancers_Liver_24261,Enhancers_Liver_24265,Enhancers_Liver_24266,Enhancers_Liver_24267,Enhancers_Liver_24277,Enhancers_Liver_24282,Enhancers_Liver_24315,Enhancers_Liver_24323,Enhancers_Liver_24338,Enhancers_Liver_26656,Enhancers_Liver_26657,Enhancers_Liver_26658,Enh…
GO:0043547	positive regulation of GTPase activity	1.6249	144	88.6207	2.18e-06	1.69413	68	40.1387	0.000318	Abr,Adrb1,Afdn,Akt2,Arap1,Arap2,Arap3,Arhgap22,Arhgap24,Arhgap25,Arhgap29,Arhgap6,Arhgef10,Arhgef5,Asap1,Bcar3,Bcas3,C9orf72,Ccl5,Chn2,Dock10,Dock9,F2r,Fermt2,Foxj1,Garnl3,Gmip,Gsk3b,Lims1,Mapre2,Ndel1,Net1,Ntf3,Picalm,Pkp4,Plxnb1,Prex1,Ptk2b,Rabgap1,Ralgps1,Ralgps2,Rap1a,Rapgef1,Rapgef2,Rapgef3,Rasgef1b,Rasgrp3,Rgl2,Rgma,Rgn,Rgs1,Rgs6,Ric1,S1pr1,Sgsm2,Sipa1l1,Snx13,Snx9,Sos2,Srgap2,Tbc1d1,Tbc1d1…	Enhancers_Liver_13436,Enhancers_Liver_13438,Enhancers_Liver_13442,Enhancers_Liver_13775,Enhancers_Liver_13958,Enhancers_Liver_13971,Enhancers_Liver_14428,Enhancers_Liver_14546,Enhancers_Liver_14555,Enhancers_Liver_14568,Enhancers_Liver_14571,Enhancers_Liver_14572,Enhancers_Liver_16468,Enhancers_Liver_16728,Enhancers_Liver_16733,Enhancers_Liver_17813,Enhancers_Liver_17814,Enhancers_Liver_17836,Enh…
GO:0002694	regulation of leukocyte activation	1.43344	242	168.825	2.54e-06	1.33575	119	89.0882	0.00864	Abl2,Abr,Actb,Ada,Adam8,Adora2a,Adora3,Ahr,Arid1b,Arid2,Bid,Blk,Blm,Bmi1,Bmp4,Cbfb,Cblb,Ccdc88b,Ccl5,Cd226,Cd24a,Cd274,Cd276,Cd3e,Cd59b,Cd83,Cd84,Ceacam10,Ctnnb1,Ctsc,Cyrib,Dicer1,Dlg1,Dlg5,Dtx1,Dusp10,Efnb1,Fgr,Foxf1,Foxj1,Foxn1,Gab2,Gata3,Gimap5,Gimap5,Gm9774,Gnrh1,H2-Aa,H2-DMb2,H2-Ob,Hlx,Hmgb1,Hps1,Icos,Igfbp2,Ighg1,Ihh,Il10,Il13ra2,Il15,Il16,Il1a,Il1b,Il2rg,Itgal,Kmt5b,Lck,Lyn,Mad1l1,Mapk8ip1…	Enhancers_Liver_10357,Enhancers_Liver_10360,Enhancers_Liver_10374,Enhancers_Liver_11402,Enhancers_Liver_11793,Enhancers_Liver_118,Enhancers_Liver_12550,Enhancers_Liver_13958,Enhancers_Liver_13971,Enhancers_Liver_14079,Enhancers_Liver_14082,Enhancers_Liver_14086,Enhancers_Liver_14091,Enhancers_Liver_14094,Enhancers_Liver_14096,Enhancers_Liver_14139,Enhancers_Liver_14428,Enhancers_Liver_1466,Enhanc…
GO:0022408	negative regulation of cell-cell adhesion	1.73701	113	65.0543	2.59e-06	1.80849	54	29.8592	0.000351	Abl2,Adam8,Adora2a,Bmp4,Cbfb,Cblb,Ccm2l,Cd24a,Cd274,Cd276,Ceacam10,Cxcl12,Dlg1,Dlg5,Dtx1,Epb41l5,Foxj1,Gimap5,Gimap5,Gnrh1,H2-Aa,Hlx,Hmgb1,Ihh,Il10,Jag1,Klf4,Mad1l1,Map2k5,Pag1,Pawr,Peli1,Pik3r1,Ppara,Ppm1f,Prkcd,Pten,Rc3h1,Rdx,Rgcc,Ripor2,Runx1,Sh2b3,Socs1,Socs6,Specc1l,Swap70,Tmem131l,Tnfaip3,Tnr,Vegfa,Vsig4,Zc3h12d,Zfp608	Enhancers_Liver_10357,Enhancers_Liver_10360,Enhancers_Liver_10374,Enhancers_Liver_11793,Enhancers_Liver_118,Enhancers_Liver_12550,Enhancers_Liver_16468,Enhancers_Liver_2029,Enhancers_Liver_2030,Enhancers_Liver_21409,Enhancers_Liver_21412,Enhancers_Liver_21417,Enhancers_Liver_21420,Enhancers_Liver_24238,Enhancers_Liver_24239,Enhancers_Liver_24253,Enhancers_Liver_24258,Enhancers_Liver_24259,Enhance…
GO:0048041	focal adhesion assembly	2.16401	62	28.6505	3.12e-06	2.06753	28	13.5427	0.00246	Actn1,Arhgap6,Bcas3,Clasp1,Coro2b,Dlc1,Efna5,Enpp2,Epb41l5,Epha3,Fermt2,Fmn1,Grem1,Itga2,Itgav,Kdr,Lims1,Lrp1,Nrp1,Ppm1f,Pten,Ptk2b,Ptprk,Pxn,Smad3,Sorbs1,Tek,Vegfa	Enhancers_Liver_11070,Enhancers_Liver_14546,Enhancers_Liver_14555,Enhancers_Liver_14568,Enhancers_Liver_14571,Enhancers_Liver_14572,Enhancers_Liver_19259,Enhancers_Liver_19274,Enhancers_Liver_19276,Enhancers_Liver_19279,Enhancers_Liver_24874,Enhancers_Liver_24889,Enhancers_Liver_24902,Enhancers_Liver_26656,Enhancers_Liver_26657,Enhancers_Liver_26658,Enhancers_Liver_27639,Enhancers_Liver_30358,Enh…
GO:0030217	T cell differentiation	1.59749	149	93.2712	3.15e-06	1.53219	66	43.0756	0.00468	Abl2,Actb,Ada,Adam17,Adam8,Arid1b,Arid2,Blm,Bmp4,Cbfb,Cd83,Cd8a,Chd7,Cracr2a,Ctnnb1,Dicer1,Dtx1,Dusp10,Foxj1,Foxn1,Foxp1,Fzd8,Gadd45g,Gata3,Gimap1,Gimap5,Gimap5,Gm9774,Gpr89,H2-Aa,Hlx,Hmgb1,Ihh,Il15,Il2rg,Jmjd6,Kit,Lck,Mr1,Ncor1,Nfkbiz,Nhej1,Nkx2-3,Pbrm1,Prdm1,Prex1,Ptger4,Rc3h1,Rhoh,Rora,Runx1,Sash3,Sema4a,Sh2b3,Sh3rf1,Socs1,Sos2,Sp3,Syk,Tgfbr2,Tmem131l,Tox,Txk,Zfp36l1,Zfp608,Zmiz1	Enhancers_Liver_118,Enhancers_Liver_12550,Enhancers_Liver_14139,Enhancers_Liver_16468,Enhancers_Liver_16521,Enhancers_Liver_16525,Enhancers_Liver_17420,Enhancers_Liver_18498,Enhancers_Liver_19108,Enhancers_Liver_19119,Enhancers_Liver_19128,Enhancers_Liver_19144,Enhancers_Liver_19145,Enhancers_Liver_19162,Enhancers_Liver_19204,Enhancers_Liver_19220,Enhancers_Liver_2029,Enhancers_Liver_2030,Enhance…
GO:1902895	positive regulation of miRNA transcription	2.25425	56	24.8419	3.19e-06	2.35721	20	8.48459	0.00313	Bmp4,Ctcf,Ets1,Fos,Fosl1,Gata3,Hif1a,Il10,Jun,Klf4,Mrtfb,Myc,Ngfr,Nr3c1,Smad1,Smad3,Srebf1,Srebf2,Tgfb2,Tgfbr1	Enhancers_Liver_13073,Enhancers_Liver_15163,Enhancers_Liver_18787,Enhancers_Liver_18795,Enhancers_Liver_18829,Enhancers_Liver_18833,Enhancers_Liver_18836,Enhancers_Liver_19673,Enhancers_Liver_19674,Enhancers_Liver_19684,Enhancers_Liver_26722,Enhancers_Liver_30798,Enhancers_Liver_30859,Enhancers_Liver_31868,Enhancers_Liver_33298,Enhancers_Liver_33306,Enhancers_Liver_33316,Enhancers_Liver_3397,Enha…
GO:0061614	miRNA transcription	2.06062	70	33.9703	3.32e-06	2.16309	24	11.0952	0.00324	App,Bmp4,Ctcf,Ets1,Fos,Fosl1,Gata3,Hif1a,Il10,Jun,Klf4,Mrtfb,Myc,Nfib,Ngfr,Nr3c1,Ppara,Smad1,Smad3,Sox9,Srebf1,Srebf2,Tgfb2,Tgfbr1	Enhancers_Liver_13073,Enhancers_Liver_15163,Enhancers_Liver_16245,Enhancers_Liver_16258,Enhancers_Liver_18787,Enhancers_Liver_18795,Enhancers_Liver_18829,Enhancers_Liver_18833,Enhancers_Liver_18836,Enhancers_Liver_19673,Enhancers_Liver_19674,Enhancers_Liver_19684,Enhancers_Liver_26722,Enhancers_Liver_30798,Enhancers_Liver_30859,Enhancers_Liver_31868,Enhancers_Liver_32116,Enhancers_Liver_32117,Enh…
GO:0050863	regulation of T cell activation	1.54789	167	107.889	3.55e-06	1.6318	86	52.7024	0.000138	Abl2,Actb,Ada,Adam8,Adora2a,Arid1b,Arid2,Bid,Blm,Bmi1,Bmp4,Cbfb,Cblb,Ccdc88b,Ccl5,Cd24a,Cd274,Cd276,Cd3e,Cd59b,Cd83,Ceacam10,Ctnnb1,Cyrib,Dicer1,Dlg1,Dlg5,Dtx1,Dusp10,Efnb1,Foxj1,Foxn1,Gata3,Gimap5,Gimap5,Gm9774,Gnrh1,H2-Aa,H2-DMb2,H2-Ob,Hlx,Hmgb1,Icos,Igfbp2,Ihh,Il15,Il1a,Il1b,Il2rg,Itgal,Lck,Mad1l1,Mapk8ip1,Nck1,Nck1,Nck2,Nfkbiz,Pag1,Pawr,Pbrm1,Peli1,Prdm1,Prkcq,Pten,Rc3h1,Rhoh,Ripor2,Runx1,Sas…	Enhancers_Liver_10357,Enhancers_Liver_10360,Enhancers_Liver_10374,Enhancers_Liver_11793,Enhancers_Liver_118,Enhancers_Liver_12550,Enhancers_Liver_14139,Enhancers_Liver_14428,Enhancers_Liver_1466,Enhancers_Liver_16468,Enhancers_Liver_18498,Enhancers_Liver_1851,Enhancers_Liver_1854,Enhancers_Liver_1855,Enhancers_Liver_2029,Enhancers_Liver_2030,Enhancers_Liver_20575,Enhancers_Liver_21409,Enhancers_L…
GO:2000147	positive regulation of cell motility	1.3651	300	219.764	4.04e-06	1.5616	146	93.4937	2.01e-06	Abl2,Ackr3,Actn4,Acvr1,Adam17,Adam8,Adora3,Akt2,Akt3,Amot,Amotl1,Angptl3,Ano6,App,Aqp1,Arf6,Arhgap5,Arhgef2,Bcar1,Bcas3,Bmp4,Capn7,Ccbe1,Ccl5,Cd274,Cfap20,Clasp1,Cpne3,Csf1,Cxcl12,Cxcl17,Dab2ip,Dapk2,Ddr2,Dicer1,Dock4,Dock5,Edn1,Enpp2,Epb41l5,Ets1,F2r,Fermt2,Fgf1,Fgfr1,Fgr,Foxf1,Foxp1,Furin,Gab1,Gab2,Gata3,Gnai2,Gpi1,Gpld1,Hdac7,Hif1a,Hmgb1,Igfbp5,Il1a,Il1b,Il1r1,Itga2,Itgav,Itgb3,Jam2,Jam3,Jcad,…	Enhancers_Liver_10357,Enhancers_Liver_10360,Enhancers_Liver_10374,Enhancers_Liver_11070,Enhancers_Liver_11085,Enhancers_Liver_118,Enhancers_Liver_12550,Enhancers_Liver_13121,Enhancers_Liver_13122,Enhancers_Liver_13374,Enhancers_Liver_13378,Enhancers_Liver_13390,Enhancers_Liver_13401,Enhancers_Liver_14030,Enhancers_Liver_14031,Enhancers_Liver_14040,Enhancers_Liver_14041,Enhancers_Liver_14054,Enhan…
GO:0042180	cellular ketone metabolic process	1.75824	106	60.2875	4.29e-06	1.5879	57	35.8964	0.00468	Acsl4,Afmid,Akt2,Ankrd26,Cbr4,Ceacam10,Ces1c,Ces1c,Ces1c,Ces1e,Coq10a,Coq8a,Dhrs9,Dkk3,Ednrb,Eif2ak3,Erlin1,Erlin2,Fabp1,Fabp1,Fabp5,Fh1,Ghsr,Glo1,H6pd,Hmgcr,Hsd17b3,Il1b,Kdsr,Kynu,Lonp2,Lpgat1,Malrd1,Mid1ip1,Mtor,Ncor1,Nr1h4,Nr4a3,Nucb2,Pank2,Pdk3,Pdk4,Pnkd,Ppara,Ppargc1a,Prkce,Rdh16f2,Rgn,Sirt1,Sirt4,Slc45a3,Slc7a11,Sox9,Srd5a2,Srebf1,Star,Wdtc1	Enhancers_Liver_1,Enhancers_Liver_11089,Enhancers_Liver_11138,Enhancers_Liver_11141,Enhancers_Liver_13073,Enhancers_Liver_16245,Enhancers_Liver_16258,Enhancers_Liver_1988,Enhancers_Liver_23199,Enhancers_Liver_24005,Enhancers_Liver_24190,Enhancers_Liver_28545,Enhancers_Liver_28546,Enhancers_Liver_28551,Enhancers_Liver_3019,Enhancers_Liver_3022,Enhancers_Liver_3025,Enhancers_Liver_3049,Enhancers_Li…
GO:0033688	regulation of osteoblast proliferation	2.80522	36	12.8332	4.72e-06	2.53604	12	4.73179	0.0182	Ahr,Fgfr2,Grem1,Gsk3b,Itgav,Itgb3,Lrp5,Ltf,Mn1,Plxnb1,Smad3,Tnn	Enhancers_Liver_15718,Enhancers_Liver_15725,Enhancers_Liver_15726,Enhancers_Liver_15727,Enhancers_Liver_17813,Enhancers_Liver_17814,Enhancers_Liver_17836,Enhancers_Liver_17851,Enhancers_Liver_17857,Enhancers_Liver_17860,Enhancers_Liver_17861,Enhancers_Liver_17862,Enhancers_Liver_17867,Enhancers_Liver_17869,Enhancers_Liver_34713,Enhancers_Liver_34732,Enhancers_Liver_43098,Enhancers_Liver_43107,Enh…
GO:0042045	epithelial fluid transport	4.36118	20	4.58591	5.12e-06	3.67725	6	1.63165	0.0279	Ahcyl1,Aqp1,Csf2,Edn1,Ednrb,Itpr1	Enhancers_Liver_12826,Enhancers_Liver_22141,Enhancers_Liver_22160,Enhancers_Liver_28545,Enhancers_Liver_28546,Enhancers_Liver_28551,Enhancers_Liver_56163,Enhancers_Liver_56166,Enhancers_Liver_56168,Enhancers_Liver_56183,Enhancers_Liver_70660,Enhancers_Liver_70669,Enhancers_Liver_70675,Enhancers_Liver_70676,Enhancers_Liver_72258,Enhancers_Liver_72267,Enhancers_Liver_72268,Enhancers_Liver_72270,Enh…
GO:0050865	regulation of cell activation	1.40616	253	179.923	5.27e-06	1.32373	127	95.9412	0.0083	Abl2,Abr,Actb,Ada,Adam8,Adora2a,Adora3,Ahr,Arid1b,Arid2,Bid,Blk,Blm,Bmi1,Bmp4,Cbfb,Cblb,Ccdc88b,Ccl5,Cd226,Cd24a,Cd274,Cd276,Cd3e,Cd59b,Cd83,Cd84,Ceacam10,Ctnnb1,Ctsc,Cyrib,Ddr2,Dicer1,Dlg1,Dlg5,Dtx1,Dusp10,Efnb1,Fgfr1,Fgr,Foxf1,Foxj1,Foxn1,Gab2,Gata3,Gclc,Gimap5,Gimap5,Gm9774,Gnrh1,H2-Aa,H2-DMb2,H2-Ob,Hlx,Hmgb1,Hps1,Icos,Igfbp2,Ighg1,Ihh,Il10,Il13ra2,Il15,Il16,Il1a,Il1b,Il2rg,Itgal,Kmt5b,Lck,Lmo…	Enhancers_Liver_10357,Enhancers_Liver_10360,Enhancers_Liver_10374,Enhancers_Liver_11402,Enhancers_Liver_11793,Enhancers_Liver_118,Enhancers_Liver_12550,Enhancers_Liver_13958,Enhancers_Liver_13971,Enhancers_Liver_14079,Enhancers_Liver_14082,Enhancers_Liver_14086,Enhancers_Liver_14091,Enhancers_Liver_14094,Enhancers_Liver_14096,Enhancers_Liver_14139,Enhancers_Liver_14428,Enhancers_Liver_1466,Enhanc…
GO:0062013	positive regulation of small molecule metabolic process	1.84928	88	47.586	5.89e-06	1.56074	41	26.2696	0.0258	Abcg4,Akt2,App,Arpp19,Ces1c,Ces1c,Ces1c,Ces1e,Eno1,Fabp1,Fabp1,Fdps,Fgf1,Foxo1,Ghsr,Gpld1,Hif1a,Hmgb1,Il1b,Lpgat1,Mid1ip1,Mtor,Myc,Nr1h4,Nr4a3,Nucb2,P2ry1,P2ry6,Ppara,Ppargc1a,Prkce,Rdh16f2,Rgn,Sec14l2,Sirt1,Slc45a3,Sorbs1,Srebf1,Srebf2,Star,Wdr5	Enhancers_Liver_11089,Enhancers_Liver_11282,Enhancers_Liver_118,Enhancers_Liver_13073,Enhancers_Liver_18787,Enhancers_Liver_18795,Enhancers_Liver_18829,Enhancers_Liver_18833,Enhancers_Liver_18836,Enhancers_Liver_21457,Enhancers_Liver_30798,Enhancers_Liver_30859,Enhancers_Liver_31868,Enhancers_Liver_32116,Enhancers_Liver_32117,Enhancers_Liver_32119,Enhancers_Liver_32125,Enhancers_Liver_3503,Enhanc…
GO:0002685	regulation of leukocyte migration	1.74263	105	60.2536	5.89e-06	1.60379	56	34.9174	0.00417	Abl2,Abr,Ada,Adam17,Adam8,Adora3,Ano6,App,Ccl5,Ccn3,Chst2,Csf1,Cxcl12,Cxcl17,Cxcr3,Dapk2,Dusp1,Edn1,Grem1,Hmgb1,Il1a,Il1b,Il1r1,Itga2,Itgb3,Jam2,Jam3,Lrch1,Lyn,Mapk1,Msn,Mtus1,Padi2,Pawr,Pecam1,Pik3r1,Plcb1,Ptger4,Ptk2b,Ptn,Rhoh,Ripor2,Sell,Selp,Slamf1,Smpd3,Spns2,St3gal4,Stk10,Swap70,Tacr1,Tlr2,Tnfaip6,Tnfsf14,Vegfa,Vegfc	Enhancers_Liver_10357,Enhancers_Liver_10360,Enhancers_Liver_10374,Enhancers_Liver_118,Enhancers_Liver_12262,Enhancers_Liver_12550,Enhancers_Liver_13657,Enhancers_Liver_13666,Enhancers_Liver_13671,Enhancers_Liver_13672,Enhancers_Liver_13958,Enhancers_Liver_13971,Enhancers_Liver_14428,Enhancers_Liver_15718,Enhancers_Liver_15725,Enhancers_Liver_15726,Enhancers_Liver_15727,Enhancers_Liver_15818,Enhan…
GO:0051492	regulation of stress fiber assembly	2.01846	69	34.1845	5.89e-06	2.10882	32	15.1744	0.000798	Arap1,Arhgap6,Arhgef10,Arhgef5,Cdc42,Clasp1,Coro2b,Dlc1,Evl,Fermt2,Inpp5k,Mtor,Nrp1,Pfn2,Pik3r1,Ppm1f,Ppp1r9a,Prkcq,Ptger4,Pxn,Rapgef3,Rgcc,Rhpn2,S1pr1,Smad3,Sorbs3,Stmn1,Synpo,Tacr1,Tgfbr1,Ttc8,Wasf2	Enhancers_Liver_13882,Enhancers_Liver_13891,Enhancers_Liver_19984,Enhancers_Liver_19985,Enhancers_Liver_20020,Enhancers_Liver_20023,Enhancers_Liver_20030,Enhancers_Liver_20533,Enhancers_Liver_20536,Enhancers_Liver_24238,Enhancers_Liver_24239,Enhancers_Liver_24253,Enhancers_Liver_24258,Enhancers_Liver_24259,Enhancers_Liver_24261,Enhancers_Liver_24265,Enhancers_Liver_24266,Enhancers_Liver_24267,Enh…
GO:0001525	angiogenesis	1.38769	269	193.847	5.97e-06	1.77932	135	75.8718	2.01e-09	Ackr3,Adam8,Adamts9,Aimp1,Akt3,Amot,Amotl1,Amotl2,Angptl3,Aqp1,Arhgap22,Arhgap24,B4galt1,Bcas3,Bmp4,Bmper,Btg1c,C3,Calcrl,Ccbe1,Ccdc134,Ccl5,Ccn3,Cd34,Cd59b,Cdc42,Ceacam10,Cemip2,Col15a1,Creb3l1,Ctnnb1,Cxcl17,Cxcr3,Dab2ip,Dcn,Ddah1,Dicer1,Dll1,Eif2ak3,Enpp2,Epas1,Epn2,Esm1,Ets1,Fgf1,Fgfr1,Fgfr2,Fmnl3,Fzd8,Gab1,Gata4,Ghsr,Glul,Grem1,Hif1a,Hipk2,Hk2,Hmga2,Hmgb1,Il10,Il1a,Il1b,Itgav,Itgb3,Jam3,Jcad,…	Enhancers_Liver_10118,Enhancers_Liver_10121,Enhancers_Liver_10122,Enhancers_Liver_10142,Enhancers_Liver_10146,Enhancers_Liver_10545,Enhancers_Liver_10724,Enhancers_Liver_11726,Enhancers_Liver_11729,Enhancers_Liver_11730,Enhancers_Liver_118,Enhancers_Liver_12550,Enhancers_Liver_13151,Enhancers_Liver_13155,Enhancers_Liver_14428,Enhancers_Liver_14546,Enhancers_Liver_14555,Enhancers_Liver_14568,Enhan…
GO:0070633	transepithelial transport	2.95798	32	10.8182	6.87e-06	2.22864	12	5.38445	0.0433	Abcg2,Actb,Ahcyl1,Aqp1,Cldn19,Csf2,Cxadr,Edn1,Ednrb,Gpld1,Itpr1,P2ry6	Enhancers_Liver_12826,Enhancers_Liver_21457,Enhancers_Liver_22141,Enhancers_Liver_22160,Enhancers_Liver_28545,Enhancers_Liver_28546,Enhancers_Liver_28551,Enhancers_Liver_35557,Enhancers_Liver_35558,Enhancers_Liver_56163,Enhancers_Liver_56166,Enhancers_Liver_56168,Enhancers_Liver_56183,Enhancers_Liver_61494,Enhancers_Liver_68414,Enhancers_Liver_70660,Enhancers_Liver_70669,Enhancers_Liver_70675,Enh…
GO:0008610	lipid biosynthetic process	1.40462	248	176.56	6.99e-06	1.30399	130	99.694	0.0117	Abca8a,Abcd3,Abcg4,Abhd2,Abhd5,Abhd6,Acsl1,Acsl4,Agps,Aldh1a3,Aldh8a1,Amacr,Asah2,Atp1a1,B3galt1,B3gnt5,B4galt3,B4galt5,C3,Cbr4,Cdipt,Ceacam10,Cept1,Ces1c,Ces1c,Ces1c,Ces1e,Cish,Crebl2,Cwh43,Cyp2r1,Cyp7b1,Dgkg,Dgki,Dgkz,Dhrs11,Dhrs9,Dkk3,Edn1,Efr3b,Erg28,Erlin1,Erlin2,Etnk1,Fa2h,Fabp5,Fdps,Fdx1,Fgf1,Gm20431,Gpld1,H6pd,Hmgcr,Hpgds,Hrh1,Hsd17b12,Hsd17b3,Hsd17b7,Hsd3b7,Htr2c,Igfbp7,Il1a,Il1b,Inpp1,I…	Enhancers_Liver_1,Enhancers_Liver_1057,Enhancers_Liver_11089,Enhancers_Liver_1117,Enhancers_Liver_11282,Enhancers_Liver_1135,Enhancers_Liver_1137,Enhancers_Liver_13073,Enhancers_Liver_14512,Enhancers_Liver_14515,Enhancers_Liver_16106,Enhancers_Liver_16521,Enhancers_Liver_16525,Enhancers_Liver_16991,Enhancers_Liver_17285,Enhancers_Liver_17286,Enhancers_Liver_17287,Enhancers_Liver_17658,Enhancers_L…
GO:0032269	negative regulation of cellular protein metabolic process	1.3166	354	268.874	7.56e-06	1.22438	178	145.38	0.0231	Actb,Adora2a,Aida,Akap1,Akt2,App,Aqp1,Arpp19,Arrb1,Atg5,Bak1,Bcor,Bmp4,Bod1,Btg2,C9orf72,Cbl,Cblb,Cdk5rap3,Cdkn1c,Cdyl,Ceacam10,Chordc1,Clec16a,Cnksr3,Crb2,Cry1,Cry1,Cry2,Ctdspl,Ctnnb1,Dab2ip,Dbndd2,Dkk1,Dnajc10,Dtnbp1,Dusp1,Dusp10,Dusp16,Dusp6,Eif2ak3,Eif3h,Eif4a3l2,Enc1,Eprs,Fabp1,Fabp1,Fam72a,Fem1al,Fh1,Fmr1,Furin,Gadd45g,Gclc,Gfi1b,Gfra2,Ggnbp2,Gnai2,Gpi1,Grem1,Grk2,Gsk3b,Gskip,Gzmb,Hipk2,Hmg…	Enhancers_Liver_10194,Enhancers_Liver_10198,Enhancers_Liver_10243,Enhancers_Liver_11070,Enhancers_Liver_12174,Enhancers_Liver_13004,Enhancers_Liver_13882,Enhancers_Liver_13891,Enhancers_Liver_14515,Enhancers_Liver_14847,Enhancers_Liver_14848,Enhancers_Liver_14849,Enhancers_Liver_14851,Enhancers_Liver_15259,Enhancers_Liver_15688,Enhancers_Liver_15818,Enhancers_Liver_15825,Enhancers_Liver_16747,Enh…
GO:0070663	regulation of leukocyte proliferation	1.6344	128	78.316	7.65e-06	1.74375	68	38.9965	0.000138	Ada,Ahr,Bid,Blk,Blm,Bmi1,Bmp4,Cblb,Ccdc88b,Ccl5,Cd24a,Cd274,Cd276,Cd3e,Cd59b,Ceacam10,Crp,Csf1,Csf2,Ctnnb1,Dlg1,Dlg5,Efnb1,Foxj1,Gnrh1,Grem1,Gsk3b,H2-Aa,H2-DMb2,Hmgb1,Igfbp2,Ihh,Il10,Il15,Il1a,Il1b,Itgal,Kit,Lyn,Mad1l1,Mapk1,Mapk8ip1,Nck1,Nck1,Nck2,Nfatc2,Ocstamp,Pawr,Peli1,Prdm1,Prkcq,Pten,Rassf5,Rc3h1,Ripor2,Sash3,Sh3rf1,Slamf1,Sos2,Syk,Tacr1,Tgfbr2,Tmem131l,Tnfrsf1b,Vav3,Vcam1,Vsig4,Zc3h12d	Enhancers_Liver_10357,Enhancers_Liver_10360,Enhancers_Liver_10374,Enhancers_Liver_11793,Enhancers_Liver_118,Enhancers_Liver_12826,Enhancers_Liver_14428,Enhancers_Liver_16468,Enhancers_Liver_17813,Enhancers_Liver_17814,Enhancers_Liver_17836,Enhancers_Liver_17851,Enhancers_Liver_17857,Enhancers_Liver_17860,Enhancers_Liver_17861,Enhancers_Liver_17862,Enhancers_Liver_17867,Enhancers_Liver_17869,Enhan…
GO:0110020	regulation of actomyosin structure organization	1.89235	80	42.2754	7.65e-06	2.10129	36	17.1324	0.000345	Akap13,Arap1,Arhgap6,Arhgef10,Arhgef5,Bmp10,Cdc42,Clasp1,Coro2b,Dlc1,Edn1,Evl,Fermt2,Inpp5k,Mtor,Mylk3,Nrp1,Pfn2,Pik3r1,Ppm1f,Ppp1r9a,Prkcq,Ptger4,Pxn,Rapgef3,Rgcc,Rhpn2,S1pr1,Smad3,Sorbs3,Stmn1,Synpo,Tacr1,Tgfbr1,Ttc8,Wasf2	Enhancers_Liver_13882,Enhancers_Liver_13891,Enhancers_Liver_19984,Enhancers_Liver_19985,Enhancers_Liver_20020,Enhancers_Liver_20023,Enhancers_Liver_20030,Enhancers_Liver_20533,Enhancers_Liver_20536,Enhancers_Liver_22141,Enhancers_Liver_22160,Enhancers_Liver_24238,Enhancers_Liver_24239,Enhancers_Liver_24253,Enhancers_Liver_24258,Enhancers_Liver_24259,Enhancers_Liver_24261,Enhancers_Liver_24265,Enh…
GO:0031589	cell-substrate adhesion	1.47968	189	127.73	8.38e-06	1.52301	83	54.4972	0.00142	Abi3bp,Actn4,Adam8,Adamts9,Angptl3,Antxr1,Arhgap6,B4galt1,Bcar1,Bcas3,Bcl2l11,Bves,Cd34,Cd3e,Cdc42,Clasp1,Coro2b,Csf1,Ctnnb1,Dbn1,Dicer1,Dlc1,Dock5,Efna5,Egfl6,Enpp2,Epb41l5,Epha3,Fermt2,Fmn1,Fndc3b,Foxf1,Grem1,Gsk3b,Hsd17b12,Itga2,Itga9,Itgae,Itgal,Itgav,Itgb3,Itgb6,Itgb7,Jag1,Jam3,Jup,Kank1,Kdr,Lama5,Lamb3,Lims1,Lrp1,Mertk,Net1,Nid2,Npnt,Nrp1,Ntng1,Onecut1,Onecut2,Pecam1,Pik3r1,Plekha2,Ppm1f,Pr…	Enhancers_Liver_11070,Enhancers_Liver_12550,Enhancers_Liver_13726,Enhancers_Liver_14546,Enhancers_Liver_14555,Enhancers_Liver_14568,Enhancers_Liver_14571,Enhancers_Liver_14572,Enhancers_Liver_15453,Enhancers_Liver_15718,Enhancers_Liver_15725,Enhancers_Liver_15726,Enhancers_Liver_15727,Enhancers_Liver_15818,Enhancers_Liver_15825,Enhancers_Liver_19356,Enhancers_Liver_19385,Enhancers_Liver_19830,Enh…
GO:0040017	positive regulation of locomotion	1.34586	305	226.62	8.79e-06	1.57121	151	96.1043	8.5e-07	Abl2,Ackr3,Actn4,Acvr1,Adam17,Adam8,Adora3,Akt2,Akt3,Amot,Amotl1,Angptl3,Ano6,App,Aqp1,Arf6,Arhgap5,Arhgef2,Bcar1,Bcas3,Bmp4,Bves,Capn7,Ccbe1,Ccl5,Cd274,Cfap20,Clasp1,Cpne3,Csf1,Cxcl12,Cxcl17,Cxcr3,Dab2ip,Dapk2,Ddr2,Dicer1,Dock4,Dock5,Edn1,Enpp2,Epb41l5,Ets1,F2r,Fermt2,Fgf1,Fgfr1,Fgr,Foxf1,Foxp1,Furin,Gab1,Gab2,Gata3,Gnai2,Gpi1,Gpld1,Hdac7,Hif1a,Hmgb1,Igfbp5,Il16,Il1a,Il1b,Il1r1,Itga2,Itgav,Itgb3…	Enhancers_Liver_10357,Enhancers_Liver_10360,Enhancers_Liver_10374,Enhancers_Liver_11070,Enhancers_Liver_11085,Enhancers_Liver_118,Enhancers_Liver_12550,Enhancers_Liver_13121,Enhancers_Liver_13122,Enhancers_Liver_13374,Enhancers_Liver_13378,Enhancers_Liver_13390,Enhancers_Liver_13401,Enhancers_Liver_14030,Enhancers_Liver_14031,Enhancers_Liver_14040,Enhancers_Liver_14041,Enhancers_Liver_14054,Enhan…
GO:0030335	positive regulation of cell migration	1.35349	294	217.216	1.04e-05	1.5877	143	90.0672	1.04e-06	Abl2,Ackr3,Actn4,Acvr1,Adam17,Adam8,Adora3,Akt2,Akt3,Amot,Amotl1,Angptl3,Ano6,App,Aqp1,Arf6,Arhgap5,Arhgef2,Bcar1,Bcas3,Bmp4,Capn7,Ccbe1,Ccl5,Cd274,Clasp1,Cpne3,Csf1,Cxcl12,Cxcl17,Dab2ip,Dapk2,Ddr2,Dicer1,Dock4,Dock5,Edn1,Enpp2,Epb41l5,Ets1,F2r,Fermt2,Fgf1,Fgfr1,Fgr,Foxf1,Foxp1,Furin,Gab1,Gab2,Gata3,Gnai2,Gpi1,Gpld1,Hdac7,Hif1a,Hmgb1,Igfbp5,Il1a,Il1b,Il1r1,Itga2,Itgav,Itgb3,Jam2,Jam3,Jcad,Jun,Kdr…	Enhancers_Liver_10357,Enhancers_Liver_10360,Enhancers_Liver_10374,Enhancers_Liver_11070,Enhancers_Liver_118,Enhancers_Liver_12550,Enhancers_Liver_13121,Enhancers_Liver_13122,Enhancers_Liver_14030,Enhancers_Liver_14031,Enhancers_Liver_14040,Enhancers_Liver_14041,Enhancers_Liver_14054,Enhancers_Liver_14428,Enhancers_Liver_14546,Enhancers_Liver_14555,Enhancers_Liver_14568,Enhancers_Liver_14571,Enhan…
GO:0043087	regulation of GTPase activity	1.47088	192	130.534	1.04e-05	1.67987	91	54.1709	2.73e-05	Abr,Adrb1,Afdn,Akt2,Amot,Arap1,Arap2,Arap3,Arhgap15,Arhgap22,Arhgap24,Arhgap25,Arhgap29,Arhgap6,Arhgef10,Arhgef5,Arrb1,Asap1,Bcar3,Bcas3,Bves,C9orf72,Cblb,Ccl5,Chn2,Dab2ip,Dgki,Dock10,Dock9,Efna5,Epha3,F2r,Fermt2,Foxj1,Gapvd1,Garnl3,Gmip,Gsk3b,Iqgap2,Lims1,Lrch1,Mapre2,Mtor,Ndel1,Net1,Ntf3,Ntrk2,Pecam1,Picalm,Pkp4,Plxna1,Plxnb1,Prex1,Ptk2b,Rabgap1,Ralgps1,Ralgps2,Rap1a,Rapgef1,Rapgef2,Rapgef3,Ras…	Enhancers_Liver_13436,Enhancers_Liver_13438,Enhancers_Liver_13442,Enhancers_Liver_13775,Enhancers_Liver_13958,Enhancers_Liver_13971,Enhancers_Liver_14428,Enhancers_Liver_14546,Enhancers_Liver_14555,Enhancers_Liver_14568,Enhancers_Liver_14571,Enhancers_Liver_14572,Enhancers_Liver_15818,Enhancers_Liver_15825,Enhancers_Liver_16468,Enhancers_Liver_16728,Enhancers_Liver_16733,Enhancers_Liver_17813,Enh…
GO:0022407	regulation of cell-cell adhesion	1.41409	232	164.063	1.06e-05	1.51081	106	70.1611	0.000319	Abl2,Actb,Ada,Adam8,Adora2a,Afdn,Arid1b,Arid2,Blk,Blm,Bmi1,Bmp4,Cbfb,Cblb,Ccdc88b,Ccl5,Ccm2l,Cd24a,Cd274,Cd276,Cd3e,Cd59b,Cd83,Ceacam10,Chst2,Cxcl12,Cyrib,Dlg1,Dlg5,Dtx1,Dusp10,Efna5,Efnb1,Epb41l5,Ets1,Foxj1,Gata3,Gimap5,Gimap5,Gnrh1,H2-Aa,H2-DMb2,H2-Ob,Hlx,Hmgb1,Icos,Igfbp2,Ihh,Il10,Il15,Il1a,Il1b,Il2rg,Itgal,Jag1,Klf4,Lck,Lyn,Mad1l1,Magi1,Magi2,Map2k5,Myo10,Nck1,Nck1,Nck2,Nfkbiz,Nr4a3,Pag1,Pawr…	Enhancers_Liver_10357,Enhancers_Liver_10360,Enhancers_Liver_10374,Enhancers_Liver_11793,Enhancers_Liver_118,Enhancers_Liver_12550,Enhancers_Liver_14428,Enhancers_Liver_1466,Enhancers_Liver_16468,Enhancers_Liver_1851,Enhancers_Liver_1854,Enhancers_Liver_1855,Enhancers_Liver_2029,Enhancers_Liver_2030,Enhancers_Liver_20575,Enhancers_Liver_21409,Enhancers_Liver_21412,Enhancers_Liver_21417,Enhancers_L…
GO:0010243	response to organonitrogen compound	1.3279	323	243.24	1.14e-05	1.34945	168	124.495	0.000789	Abcc9,Actb,Acvr1c,Ada,Adcy8,Adora2a,Ahr,Akt2,Akt3,Amigo1,Ankrd26,App,Aqp1,Arhgef2,Asph,Atp2b1,Bcap31,Bcar1,Blm,C2cd5,Cacybp,Calcr,Casp7,Ccdc47,Cdk1,Cdo1,Ceacam10,Ces1c,Ces1c,Ces1c,Ces1e,Cracr2a,Crem,Cry1,Cry1,Cry2,Ctnnb1,Derl1,Dnajc10,Dnmt3a,Edem1,Edn1,Ednrb,Eif2ak3,Eif2b2,Eprs,Erlin1,Erlin2,Fdx1,Folr1,Foxo1,Ghsr,Gm10320,Gm45837,Gnai2,Gpi1,Gpld1,Grb14,Grk2,Grm5,Gsk3b,Hnrnpd,Hrh1,Igfbp5,Il1b,Inpp5…	Enhancers_Liver_10167,Enhancers_Liver_10172,Enhancers_Liver_10173,Enhancers_Liver_10174,Enhancers_Liver_10429,Enhancers_Liver_11070,Enhancers_Liver_118,Enhancers_Liver_13882,Enhancers_Liver_13891,Enhancers_Liver_14005,Enhancers_Liver_14610,Enhancers_Liver_14943,Enhancers_Liver_15163,Enhancers_Liver_15453,Enhancers_Liver_15758,Enhancers_Liver_16245,Enhancers_Liver_16258,Enhancers_Liver_16991,Enhan…
GO:0002683	negative regulation of immune system process	1.48545	182	122.522	1.14e-05	1.3829	88	63.6345	0.0128	Abr,Acod1,Ada,Adora2a,Ahr,Apcs,Atg12,Atg5,Blk,Bmp4,C9orf72,Cbfb,Cblb,Ccn3,Cd24a,Cd274,Cd276,Cd59b,Cd84,Ceacam10,Cr1l,Ctnnb1,Cxcl12,Dgkz,Dlg1,Dlg5,Dll1,Dtx1,Dusp1,Dusp10,Fgr,Foxf1,Foxj1,Gimap5,Gimap5,Gnrh1,Gpr68,Grem1,H2-Aa,H2-Ob,Hlx,Hmgb1,Ifi203,Ihh,Il10,Il13ra2,Inpp4b,Lrch1,Lyn,Mad1l1,Mertk,Myc,Nlrc3,Nmi,Padi2,Pag1,Pawr,Peli1,Pik3r1,Plcb1,Plcl2,Prdm1,Psma1,Pten,Ptger4,Rassf5,Rc3h1,Rhbdd3,Ripor2,…	Enhancers_Liver_10357,Enhancers_Liver_10360,Enhancers_Liver_10374,Enhancers_Liver_10914,Enhancers_Liver_11402,Enhancers_Liver_11793,Enhancers_Liver_118,Enhancers_Liver_13958,Enhancers_Liver_13971,Enhancers_Liver_16245,Enhancers_Liver_16258,Enhancers_Liver_16468,Enhancers_Liver_17813,Enhancers_Liver_17814,Enhancers_Liver_17836,Enhancers_Liver_17851,Enhancers_Liver_17857,Enhancers_Liver_17860,Enhan…
GO:0032945	negative regulation of mononuclear cell proliferation	2.32741	47	20.1941	1.14e-05	2.14904	27	12.5637	0.00176	Blk,Bmp4,Cblb,Cd24a,Cd274,Cd276,Ceacam10,Crp,Dlg1,Dlg5,Foxj1,Gnrh1,H2-Aa,Ihh,Il10,Lyn,Mad1l1,Pawr,Peli1,Prdm1,Pten,Rassf5,Rc3h1,Ripor2,Tmem131l,Vsig4,Zc3h12d	Enhancers_Liver_10357,Enhancers_Liver_10360,Enhancers_Liver_10374,Enhancers_Liver_11793,Enhancers_Liver_16468,Enhancers_Liver_2029,Enhancers_Liver_2030,Enhancers_Liver_21409,Enhancers_Liver_21412,Enhancers_Liver_21417,Enhancers_Liver_21420,Enhancers_Liver_25780,Enhancers_Liver_26722,Enhancers_Liver_27392,Enhancers_Liver_27410,Enhancers_Liver_27724,Enhancers_Liver_3397,Enhancers_Liver_3417,Enhance…
GO:0048872	homeostasis of number of cells	1.74879	99	56.6106	1.17e-05	1.49078	45	30.1856	0.0356	Afdn,Ahr,Akt3,Arhgef5,Bak1,Bcl2l11,Bmi1,Ccn3,Ccnb2,Cdh2,Col14a1,Csf1,Dock10,F2r,Fh1,Foxa3,Foxn1,Fstl1,Gata3,Gimap5,Gimap5,Gpi1,Hif1a,Jam3,Kras,Lyn,Mthfd1,Myct1,Nkx2-3,P2ry14,Pde4b,Rc3h1,Rpa1,Sash3,Sh2b3,Skil,Slc40a1,Sos2,Sox9,Spns2,Tnfaip3,Tnfrsf17,Vegfa,Zbtb18,Zfx	Enhancers_Liver_13657,Enhancers_Liver_13666,Enhancers_Liver_13671,Enhancers_Liver_13672,Enhancers_Liver_13838,Enhancers_Liver_14139,Enhancers_Liver_16245,Enhancers_Liver_16258,Enhancers_Liver_17813,Enhancers_Liver_17814,Enhancers_Liver_17836,Enhancers_Liver_17851,Enhancers_Liver_17857,Enhancers_Liver_17860,Enhancers_Liver_17861,Enhancers_Liver_17862,Enhancers_Liver_17867,Enhancers_Liver_17869,Enh…
GO:0002695	negative regulation of leukocyte activation	1.7537	97	55.3118	1.21e-05	1.60029	47	29.3697	0.0102	Abr,Adora2a,Blk,Bmp4,Cbfb,Cblb,Cd24a,Cd274,Cd276,Cd84,Ceacam10,Dlg1,Dlg5,Dtx1,Fgr,Foxf1,Foxj1,Gimap5,Gimap5,Gnrh1,H2-Aa,Hlx,Hmgb1,Ihh,Il10,Il13ra2,Lyn,Mad1l1,Mertk,Pag1,Pawr,Peli1,Prdm1,Pten,Rassf5,Rc3h1,Rhbdd3,Ripor2,Runx1,Socs1,Socs6,Thoc1,Tmem131l,Tnfaip3,Vsig4,Zc3h12d,Zfp608	Enhancers_Liver_10357,Enhancers_Liver_10360,Enhancers_Liver_10374,Enhancers_Liver_11402,Enhancers_Liver_11793,Enhancers_Liver_118,Enhancers_Liver_13958,Enhancers_Liver_13971,Enhancers_Liver_16468,Enhancers_Liver_2029,Enhancers_Liver_2030,Enhancers_Liver_21409,Enhancers_Liver_21412,Enhancers_Liver_21417,Enhancers_Liver_21420,Enhancers_Liver_25780,Enhancers_Liver_26722,Enhancers_Liver_27392,Enhance…
GO:0045987	positive regulation of smooth muscle contraction	2.70481	35	12.9399	1.21e-05	2.84549	13	4.56863	0.00485	Ada,Adra1a,Edn1,F2r,Ghsr,Itga2,Kit,Lck,Npnt,Pawr,Ptgs1,Spx,Tacr1	Enhancers_Liver_10357,Enhancers_Liver_10360,Enhancers_Liver_10374,Enhancers_Liver_22141,Enhancers_Liver_22160,Enhancers_Liver_23891,Enhancers_Liver_23896,Enhancers_Liver_23897,Enhancers_Liver_23906,Enhancers_Liver_23919,Enhancers_Liver_23921,Enhancers_Liver_24874,Enhancers_Liver_24889,Enhancers_Liver_24902,Enhancers_Liver_27686,Enhancers_Liver_47707,Enhancers_Liver_47711,Enhancers_Liver_47712,Enh…
GO:0045834	positive regulation of lipid metabolic process	1.78094	91	51.0965	1.3e-05	1.76591	51	28.8803	0.000928	Abcg4,Abhd5,Abhd6,Akt2,Angptl3,App,Cdc42,Ces1c,Ces1c,Ces1c,Ces1e,Crebl2,Dgkz,Fabp1,Fabp1,Fdps,Fgf1,Fgr,Ghsr,Gpld1,Htr2c,Il1a,Il1b,Lpgat1,Lyn,Mid1ip1,Mtor,Nr1h4,Nr4a3,Nucb2,Pcx,Pdgfra,Pik3r4,Ppara,Ppargc1a,Prkcd,Prkce,Ptk2b,Rab38,Rdh16f2,Rgn,Sec14l2,Sirt4,Slc45a3,Smpd3,Sorbs1,Srebf1,Srebf2,Star,Tek,Vav3	Enhancers_Liver_11089,Enhancers_Liver_11282,Enhancers_Liver_13073,Enhancers_Liver_19830,Enhancers_Liver_21457,Enhancers_Liver_25027,Enhancers_Liver_26135,Enhancers_Liver_27639,Enhancers_Liver_31868,Enhancers_Liver_32116,Enhancers_Liver_32117,Enhancers_Liver_32119,Enhancers_Liver_32125,Enhancers_Liver_3503,Enhancers_Liver_35648,Enhancers_Liver_35652,Enhancers_Liver_39434,Enhancers_Liver_39435,Enha…
GO:0010595	positive regulation of endothelial cell migration	1.75343	95	54.1796	1.37e-05	2.0077	38	18.9272	0.000554	Adam17,Akt3,Amot,Amotl1,Bcar1,Bcas3,Bmp4,Ccbe1,Dicer1,Ets1,Fgf1,Fgfr1,Foxp1,Gata3,Gpi1,Gpld1,Hdac7,Hif1a,Hmgb1,Itgb3,Jcad,Kdr,Lcn2,Map2k3,Nfe2l2,Nrp1,Pik3c2a,Pik3cg,Plk2,Plpp3,Ptk2b,Rhoj,Rin2,Sash1,Sirt1,Tek,Vegfa,Vegfc	Enhancers_Liver_118,Enhancers_Liver_13121,Enhancers_Liver_13122,Enhancers_Liver_14546,Enhancers_Liver_14555,Enhancers_Liver_14568,Enhancers_Liver_14571,Enhancers_Liver_14572,Enhancers_Liver_15718,Enhancers_Liver_15725,Enhancers_Liver_15726,Enhancers_Liver_15727,Enhancers_Liver_17420,Enhancers_Liver_17658,Enhancers_Liver_18787,Enhancers_Liver_18795,Enhancers_Liver_18829,Enhancers_Liver_18833,Enhan…
GO:1904951	positive regulation of establishment of protein localization	1.54594	149	96.3812	1.44e-05	1.34719	71	52.7024	0.0436	1700009N14Rik,A1cf,Acsl4,Adcy8,Adora2a,Adrb1,Akt2,App,Arf6,Arhgef5,Arrb1,Asph,Atp2c1,Bcap31,Bcas3,Blk,C1qtnf3,C2cd5,Cdc42,Cdk1,Coro2b,Crebrf,Edem1,Exph5,Frmd4a,Glud1,Glul,Gpld1,Gpr68,Gsk3b,Hcls1,Hif1a,Ice1,Il1a,Jup,Lrp1,Lrp2,Malrd1,Mapk1,Myh10,Myo18a,Nr1h4,Pcm1,Pcsk1,Pdcd10,Pik3r1,Ppm1a,Prkcd,Prkce,Prkcq,Ptger4,Ptp4a3,Rapgef3,Rbp4,Ripor1,Sar1b,Sirt1,Sorl1,Stxbp5l,Tek,Tgfb2,Tlr2,Tmed10,Tmem30a,Tom…	Enhancers_Liver_11070,Enhancers_Liver_12714,Enhancers_Liver_12716,Enhancers_Liver_13436,Enhancers_Liver_14079,Enhancers_Liver_14082,Enhancers_Liver_14086,Enhancers_Liver_14091,Enhancers_Liver_14094,Enhancers_Liver_14096,Enhancers_Liver_14546,Enhancers_Liver_14555,Enhancers_Liver_14568,Enhancers_Liver_14571,Enhancers_Liver_14572,Enhancers_Liver_15453,Enhancers_Liver_18458,Enhancers_Liver_18750,Enh…

## Sheet: Heart enhancers up ancestral mo
GO	Name	Binom Enrichment	# foreground regions	# expected regions	Binom BH p-value	Hyper Enrichment	# foreground genes	# expected genes	Hyper BH p-value	Genes		Regions
GO:0043467	regulation of generation of precursor metabolites and energy	2.36374	120	50.7669	1.01e-13	1.87371	46	24.5502	0.000279	Actn3,App,Bnip3,Cavin3,Cdk1,Cox7a2,Cycs,Dnajc15,Dyrk2,Enpp1,Esrrb,Gfpt1,Git1,Gm45837,Hdac4,Hif1a,Ifng,Igf1,Igf2,Inpp5k,Irs1,Iscu,Mfn2,Myc,Myo5a,Oas1b,Phlda2,Pik3ca,Pink1,Ppara,Ppargc1a,Ppif,Ppp1cb,Ppp1r3a,Ppp1r3b,Prkag2,Prxl2c,Psen1,Sco1,Shmt2,Sorbs1,Tigar,Trap1,Uqcc2,Vcp,Zbtb7a		Enhancers_Heart_10572,Enhancers_Heart_10907,Enhancers_Heart_10909,Enhancers_Heart_10910,Enhancers_Heart_10929,Enhancers_Heart_10930,Enhancers_Heart_10931,Enhancers_Heart_12078,Enhancers_Heart_12093,Enhancers_Heart_12372,Enhancers_Heart_14990,Enhancers_Heart_15623,Enhancers_Heart_15851,Enhancers_Heart_21078,Enhancers_Heart_21108,Enhancers_Heart_21114,Enhancers_Heart_21123,Enhancers_Heart_21125,Enh…
GO:0043457	regulation of cellular respiration	3.21403	65	20.2238	1.53e-12	1.99139	20	10.0433	0.0151	Actn3,Bnip3,Cox7a2,Cycs,Dnajc15,Gm45837,Hif1a,Ifng,Iscu,Mfn2,Myc,Oas1b,Pik3ca,Pink1,Ppargc1a,Ppif,Shmt2,Trap1,Uqcc2,Vcp		Enhancers_Heart_12078,Enhancers_Heart_12372,Enhancers_Heart_21078,Enhancers_Heart_21108,Enhancers_Heart_21114,Enhancers_Heart_21123,Enhancers_Heart_21125,Enhancers_Heart_21141,Enhancers_Heart_28481,Enhancers_Heart_28486,Enhancers_Heart_28496,Enhancers_Heart_28512,Enhancers_Heart_28513,Enhancers_Heart_28521,Enhancers_Heart_30920,Enhancers_Heart_30921,Enhancers_Heart_30926,Enhancers_Heart_30927,Enh…
GO:0045936	negative regulation of phosphate metabolic process	1.59249	314	197.176	1.78e-12	1.59642	125	78.3002	1.94e-06	Actn3,Adar,Adora2a,Ahr,Aida,Aida,Akap1,Angpt1,Arpp19,Atg14,Bag1,Bmp2,Bmp4,Bod1,C9orf72,Camk2n1,Cblc,Cdkn1a,Cdkn1c,Cdkn2b,Ceacam10,Cep85,Cib1,Cry2,Ctdsp2,Ctdspl,Dab2ip,Ddr2,Dkk1,Dnajc10,Dtnbp1,Dusp1,Dusp10,Dusp22,Dusp6,Enpp1,Ensa,Epm2a,Fam72a,Fbxo7,Foxa2,Gadd45g,Gfra2,Git1,Gprc5a,Gskip,Hdac4,Hgf,Hipk3,Hspa4,Hspb1,Ibtk,Ifng,Igf1,Ikbkb,Inpp5k,Jun,Kat2b,Lpin1,Lrp1,Lrp6,Macroh2a1,Mapt,Mfhas1,Mgat5,Mvp…		Enhancers_Heart_10108,Enhancers_Heart_10829,Enhancers_Heart_10833,Enhancers_Heart_10907,Enhancers_Heart_10909,Enhancers_Heart_10910,Enhancers_Heart_10929,Enhancers_Heart_10930,Enhancers_Heart_10931,Enhancers_Heart_11563,Enhancers_Heart_11573,Enhancers_Heart_11609,Enhancers_Heart_11612,Enhancers_Heart_12078,Enhancers_Heart_12333,Enhancers_Heart_12372,Enhancers_Heart_13424,Enhancers_Heart_13431,Enh…
GO:1901861	regulation of muscle tissue development	2.68603	80	29.7837	8.46e-12	2.1507	22	10.2292	0.00383	Actn3,Bmp4,Cdon,Ctnnb1,Dll1,Fgf3,Gja6,Hdac7,Hdac9,Igf2,Igfbp5,Jph2,Lef1,Mef2c,Mrtfb,Myf6,Ppargc1a,Shox2,Smad3,Sox15,Tgfb1,Tsc22d3		Enhancers_Heart_11726,Enhancers_Heart_15211,Enhancers_Heart_1967,Enhancers_Heart_19978,Enhancers_Heart_19980,Enhancers_Heart_19984,Enhancers_Heart_19985,Enhancers_Heart_19996,Enhancers_Heart_19997,Enhancers_Heart_20007,Enhancers_Heart_20013,Enhancers_Heart_20015,Enhancers_Heart_20023,Enhancers_Heart_20048,Enhancers_Heart_26195,Enhancers_Heart_26212,Enhancers_Heart_26213,Enhancers_Heart_26227,Enha…
GO:0008016	regulation of heart contraction	1.7743	191	107.648	6.6e-11	1.92463	63	32.7336	5.35e-06	Ada,Adra1a,Adrb1,Akap6,Atp1a1,Atp1b1,Bmp10,Cacna1c,Cacna2d1,Calm1,Calm2,Chrm2,Crhr2,Ctnna3,Dlg1,Edn1,Edn2,Ednrb,Ehd3,Epas1,Gata4,Gch1,Gja5,Gja6,Gnao1,Hcn4,Hdac4,Ifng,Irx5,Jup,Kcna5,Kcnj2,Kcnj5,Kcnq1,Mef2a,Myh6,Nos1ap,Nppa,Pde4b,Pde5a,Pebp1,Pik3r1,Pln,Pmch,Rgs2,Sema3a,Shox2,Slc4a3,Slc8a1,Slc9a1,Smad7,Sp4,Srebf1,Stc1,Tbx5,Tgfb2,Th,Thrb,Tmem161b,Tmem38b,Tmem65,Tpm1,Zc3h12a		Enhancers_Heart_10929,Enhancers_Heart_10930,Enhancers_Heart_10931,Enhancers_Heart_12078,Enhancers_Heart_14640,Enhancers_Heart_14641,Enhancers_Heart_14643,Enhancers_Heart_14655,Enhancers_Heart_17274,Enhancers_Heart_18039,Enhancers_Heart_18045,Enhancers_Heart_18046,Enhancers_Heart_18049,Enhancers_Heart_18057,Enhancers_Heart_18058,Enhancers_Heart_20479,Enhancers_Heart_2210,Enhancers_Heart_2211,Enhan…
GO:0046885	regulation of hormone biosynthetic process	3.01516	57	18.9044	4.05e-10	2.1507	12	5.57959	0.0461	Atp1a1,Bmp2,Dkk3,H6pd,Hif1a,Igf1,Igf1r,Igf2,Nr3c1,Por,Ppargc1a,Stc2		Enhancers_Heart_10907,Enhancers_Heart_10909,Enhancers_Heart_10910,Enhancers_Heart_10929,Enhancers_Heart_10930,Enhancers_Heart_10931,Enhancers_Heart_13424,Enhancers_Heart_13431,Enhancers_Heart_21078,Enhancers_Heart_21108,Enhancers_Heart_21114,Enhancers_Heart_21123,Enhancers_Heart_21125,Enhancers_Heart_21141,Enhancers_Heart_45131,Enhancers_Heart_45138,Enhancers_Heart_45147,Enhancers_Heart_45159,Enh…
GO:1901857	positive regulation of cellular respiration	4.18178	37	8.84791	4.49e-10	2.54688	9	3.53374	0.0383	Cycs,Ifng,Iscu,Mfn2,Myc,Oas1b,Pink1,Ppargc1a,Vcp		Enhancers_Heart_12078,Enhancers_Heart_33563,Enhancers_Heart_33564,Enhancers_Heart_67727,Enhancers_Heart_68264,Enhancers_Heart_68272,Enhancers_Heart_70495,Enhancers_Heart_70497,Enhancers_Heart_70502,Enhancers_Heart_70503,Enhancers_Heart_70504,Enhancers_Heart_70505,Enhancers_Heart_70506,Enhancers_Heart_70507,Enhancers_Heart_70509,Enhancers_Heart_70512,Enhancers_Heart_70514,Enhancers_Heart_70517,Enh…
GO:0060047	heart contraction	1.68776	205	121.463	5.12e-10	1.95011	70	35.8954	7.49e-07	Actc1,Ada,Adra1a,Adrb1,Akap6,Atp1a1,Atp1b1,Bmp10,Cacna1c,Cacna2d1,Calm1,Calm2,Cdc42,Chrm2,Crhr2,Ctnna3,Dlg1,Edn1,Edn2,Ednrb,Ehd3,Epas1,Ext1,Ext2,Gata4,Gch1,Gja5,Gja6,Gnao1,Hcn4,Hdac4,Ifng,Irx5,Jup,Kcna5,Kcnj2,Kcnj5,Kcnq1,Mef2a,Myh6,Nos1ap,Nppa,Pde4b,Pde5a,Pebp1,Pik3r1,Pln,Pmch,Rangrf,Rgs2,Rnls,Rps6ka2,Sema3a,Shox2,Slc4a3,Slc8a1,Slc9a1,Smad7,Sp4,Srebf1,Stc1,Tbx5,Tgfb2,Th,Thrb,Tmem161b,Tmem38b,Tmem…		Enhancers_Heart_10929,Enhancers_Heart_10930,Enhancers_Heart_10931,Enhancers_Heart_12078,Enhancers_Heart_14640,Enhancers_Heart_14641,Enhancers_Heart_14643,Enhancers_Heart_14655,Enhancers_Heart_15169,Enhancers_Heart_17274,Enhancers_Heart_18039,Enhancers_Heart_18045,Enhancers_Heart_18046,Enhancers_Heart_18049,Enhancers_Heart_18057,Enhancers_Heart_18058,Enhancers_Heart_20479,Enhancers_Heart_2210,Enha…
GO:0010675	regulation of cellular carbohydrate metabolic process	1.99946	125	62.5169	5.29e-10	1.60234	45	28.0839	0.00894	Actn3,Arpp19,Avpr1b,C1qtnf3,Cry1,Dusp12,Dyrk2,Enpp1,Esrrb,Foxa2,Foxk1,Foxo1,Gfpt1,Git1,Hdac4,Hif1a,Igf1,Igf2,Inpp5k,Irs1,Kat2b,Lep,Nfe2l1,Nln,Nr3c1,P2ry1,Pdk2,Pfkfb2,Phlda2,Pou1f1,Ppara,Ppargc1a,Ppp1cb,Ppp1r3a,Ppp1r3b,Prkce,Ptk2b,Rora,Rorc,Sik1,Slc45a3,Soga1,Sorbs1,Src,Tigar		Enhancers_Heart_10907,Enhancers_Heart_10909,Enhancers_Heart_10910,Enhancers_Heart_10929,Enhancers_Heart_10930,Enhancers_Heart_10931,Enhancers_Heart_12078,Enhancers_Heart_12093,Enhancers_Heart_15623,Enhancers_Heart_15851,Enhancers_Heart_16882,Enhancers_Heart_16884,Enhancers_Heart_16885,Enhancers_Heart_17028,Enhancers_Heart_21078,Enhancers_Heart_21108,Enhancers_Heart_21114,Enhancers_Heart_21123,Enh…
GO:0003015	heart process	1.67204	207	123.801	6.8e-10	1.91833	71	37.0113	1.13e-06	Actc1,Ada,Adra1a,Adrb1,Akap6,Atp1a1,Atp1b1,Bmp10,Cacna1c,Cacna2d1,Calm1,Calm2,Cdc42,Chrm2,Crhr2,Ctnna3,Dlg1,Edn1,Edn2,Ednrb,Ehd3,Epas1,Ext1,Ext2,Gata4,Gch1,Gja5,Gja6,Gnao1,Hcn4,Hdac4,Ifng,Irx5,Jup,Kcna5,Kcnj2,Kcnj5,Kcnq1,Mef2a,Myh6,Nos1ap,Nppa,Pde4b,Pde5a,Pebp1,Pik3r1,Pln,Pmch,Rangrf,Rgs2,Rnls,Rps6ka2,Sema3a,Shox2,Slc4a3,Slc8a1,Slc9a1,Smad7,Sp4,Srebf1,Stc1,Tbx5,Tgfb2,Th,Thrb,Tmem161b,Tmem38b,Tmem…		Enhancers_Heart_10929,Enhancers_Heart_10930,Enhancers_Heart_10931,Enhancers_Heart_12078,Enhancers_Heart_14640,Enhancers_Heart_14641,Enhancers_Heart_14643,Enhancers_Heart_14655,Enhancers_Heart_15169,Enhancers_Heart_17274,Enhancers_Heart_18039,Enhancers_Heart_18045,Enhancers_Heart_18046,Enhancers_Heart_18049,Enhancers_Heart_18057,Enhancers_Heart_18058,Enhancers_Heart_20479,Enhancers_Heart_2210,Enha…
GO:0006109	regulation of carbohydrate metabolic process	1.89141	143	75.6049	6.8e-10	1.64534	56	34.0355	0.00155	Actn3,App,Arpp19,Avpr1b,C1qtnf3,Cry1,Dusp12,Dyrk2,Enpp1,Esrrb,Foxa2,Foxk1,Foxo1,Gfpt1,Git1,Has2,Hdac4,Hif1a,Ifng,Igf1,Igf2,Inpp5k,Irs1,Kat2b,Lep,Myc,Nfe2l1,Nln,Nr1h4,Nr3c1,P2ry1,Pdk2,Pfkfb2,Phlda2,Pou1f1,Ppara,Ppargc1a,Ppp1cb,Ppp1r3a,Ppp1r3b,Prkag2,Prkce,Prxl2c,Psen1,Ptk2b,Rora,Rorc,Sik1,Slc45a3,Smpd3,Soga1,Sorbs1,Src,Tgfb1,Tigar,Zbtb7a		Enhancers_Heart_10572,Enhancers_Heart_10907,Enhancers_Heart_10909,Enhancers_Heart_10910,Enhancers_Heart_10929,Enhancers_Heart_10930,Enhancers_Heart_10931,Enhancers_Heart_11001,Enhancers_Heart_12078,Enhancers_Heart_12093,Enhancers_Heart_15623,Enhancers_Heart_15851,Enhancers_Heart_16882,Enhancers_Heart_16884,Enhancers_Heart_16885,Enhancers_Heart_17028,Enhancers_Heart_21078,Enhancers_Heart_21108,Enh…
GO:0042326	negative regulation of phosphorylation	1.54197	273	177.046	1.28e-09	1.57796	108	68.443	2.18e-05	Actn3,Adar,Adora2a,Aida,Aida,Angpt1,Atg14,Bag1,Bmp2,Bmp4,C9orf72,Camk2n1,Cblc,Cdkn1a,Cdkn1c,Cdkn2b,Ceacam10,Cep85,Cib1,Ctdsp2,Ctdspl,Dab2ip,Ddr2,Dkk1,Dnajc10,Dtnbp1,Dusp1,Dusp10,Dusp22,Dusp6,Enpp1,Epm2a,Fam72a,Fbxo7,Foxa2,Gadd45g,Gfra2,Git1,Gprc5a,Gskip,Hdac4,Hgf,Hipk3,Hspa4,Hspb1,Ibtk,Ifng,Igf1,Inpp5k,Jun,Kat2b,Lrp1,Lrp6,Macroh2a1,Mapt,Mvp,Myocd,Nck1,Nck1,Npm1,Nppa,Nr2f2,Ntf3,Pard3,Pbk,Pebp1,Pik…		Enhancers_Heart_10108,Enhancers_Heart_10829,Enhancers_Heart_10833,Enhancers_Heart_10907,Enhancers_Heart_10909,Enhancers_Heart_10910,Enhancers_Heart_10929,Enhancers_Heart_10930,Enhancers_Heart_10931,Enhancers_Heart_11563,Enhancers_Heart_11573,Enhancers_Heart_11609,Enhancers_Heart_11612,Enhancers_Heart_12078,Enhancers_Heart_12333,Enhancers_Heart_12372,Enhancers_Heart_14213,Enhancers_Heart_14919,Enh…
GO:0061036	positive regulation of cartilage development	2.63376	66	25.0592	1.48e-09	3.07242	16	5.20762	0.000263	Bmp1,Bmp10,Bmp2,Bmp4,Gli3,Loxl2,Pkdcc,Por,Runx2,Smad3,Smad7,Sox6,Sox9,Thrb,Wnt5a,Zbtb16		Enhancers_Heart_18073,Enhancers_Heart_23765,Enhancers_Heart_27884,Enhancers_Heart_27886,Enhancers_Heart_27887,Enhancers_Heart_27895,Enhancers_Heart_27899,Enhancers_Heart_27923,Enhancers_Heart_27925,Enhancers_Heart_27935,Enhancers_Heart_27941,Enhancers_Heart_27942,Enhancers_Heart_27943,Enhancers_Heart_27950,Enhancers_Heart_27951,Enhancers_Heart_27960,Enhancers_Heart_27965,Enhancers_Heart_28695,Enh…
GO:0044092	negative regulation of molecular function	1.34807	504	373.866	2.37e-09	1.31522	227	172.595	0.000132	Acod1,Adar,Adgrv1,Adora2a,Adora3,Ahr,Aida,Aida,Aip,Akap6,Amot,Ank3,Anxa1,App,Aqp1,Arhgap28,Arl6ip1,Atp2a3,Bcas3,Bmp2,Bmp4,Bod1,C9orf72,Calm1,Calm2,Camk1,Camk2a,Camk2d,Camk2n1,Cand1,Carm1,Cat,Cblc,Ccar2,Cd44,Cdkn1a,Cdkn1c,Ceacam10,Cep85,Chuk,Cln8,Cmklr1,Cnn3,Commd7,Crb2,Cry2,Dab2ip,Dact1,Dap,Ddit3,Ddr2,Dhrs7b,Disc1,Dkk1,Dtnbp1,Dusp1,Dusp10,Dusp22,E2f1,Eomes,Epb41l5,Epm2a,Erbin,Ercc4,Esr1,Fam72a,Fb…		Enhancers_Heart_10108,Enhancers_Heart_10829,Enhancers_Heart_10833,Enhancers_Heart_10864,Enhancers_Heart_10865,Enhancers_Heart_10907,Enhancers_Heart_10909,Enhancers_Heart_10910,Enhancers_Heart_10929,Enhancers_Heart_10930,Enhancers_Heart_10931,Enhancers_Heart_11001,Enhancers_Heart_12078,Enhancers_Heart_12093,Enhancers_Heart_12127,Enhancers_Heart_12354,Enhancers_Heart_13075,Enhancers_Heart_13080,Enh…
GO:0048534	hematopoietic or lymphoid organ development	1.42927	362	253.276	4.2e-09	1.45453	145	99.6886	4.16e-05	Ada,Adam17,Adar,Ahr,Ambra1,Angpt1,Anxa1,Arid1b,Arid2,Atg7,Bcl2l11,Bcr,Bmp4,Brd1,Cacnb4,Card11,Cartpt,Cd34,Cd40lg,Cd44,Cdc73,Cdh17,Cdkn2b,Ceacam10,Ciapin1,Cib1,Csf3r,Ctc1,Ctnnb1,Dll1,Dtx1,Dusp10,Epas1,Ephb3,Erbb2,Ets1,Etv2,Fas,Fbxo7,Fbxw7,Fgf3,Fgfr3,Fos,Foxp1,Gabpa,Gli3,Gnas,Gpr68,Hand2,Hcls1,Hif1a,Hlx,Hspa9,Hspb1,Ifng,Il10,Il15,Il17a,Inpp4b,Inpp5d,Jag1,Jarid2,Jun,Kat6a,Kat7,Kirrel3,Kitl,Klf13,Lag…		Enhancers_Heart_10078,Enhancers_Heart_10208,Enhancers_Heart_10572,Enhancers_Heart_10829,Enhancers_Heart_10833,Enhancers_Heart_11640,Enhancers_Heart_11641,Enhancers_Heart_12078,Enhancers_Heart_12593,Enhancers_Heart_12615,Enhancers_Heart_15169,Enhancers_Heart_15565,Enhancers_Heart_15570,Enhancers_Heart_15572,Enhancers_Heart_16896,Enhancers_Heart_16911,Enhancers_Heart_17154,Enhancers_Heart_18459,Enh…
GO:0002062	chondrocyte differentiation	1.84241	141	76.5301	4.2e-09	2.37039	41	17.2967	1.8e-06	Adamts7,Anxa6,Bmp2,Bmp4,Bmpr1a,Bmpr1b,Chadl,Creb3l2,Ctnnb1,Ext1,Ext2,Fgf9,Gli2,Gli3,Hif1a,Hmga2,Loxl2,Maf,Matn1,Mef2c,Mef2d,Mkx,Nfib,Pkdcc,Por,Pthlh,Rarb,Ror2,Runx2,Scube2,Shox2,Slc39a14,Smad3,Smad7,Snx19,Sox6,Sox9,Tgfb1,Thrb,Trps1,Zbtb16		Enhancers_Heart_12127,Enhancers_Heart_14365,Enhancers_Heart_18073,Enhancers_Heart_21078,Enhancers_Heart_21108,Enhancers_Heart_21114,Enhancers_Heart_21123,Enhancers_Heart_21125,Enhancers_Heart_21141,Enhancers_Heart_23765,Enhancers_Heart_25364,Enhancers_Heart_26195,Enhancers_Heart_26212,Enhancers_Heart_26213,Enhancers_Heart_26227,Enhancers_Heart_26239,Enhancers_Heart_26247,Enhancers_Heart_26248,Enh…
GO:0032269	negative regulation of cellular protein metabolic process	1.34723	489	362.967	4.81e-09	1.26725	210	165.714	0.002	Adar,Adgrb1,Adora2a,Aida,Aida,Akap1,Angpt1,Anks1,App,Aqp1,Aqp11,Arl6ip1,Arpp19,Atg14,Atg7,Bag1,Bank1,Bcor,Bmp2,Bmp4,Bod1,C9orf72,Camk2n1,Cblc,Ccar2,Cd44,Cdkn1a,Cdkn1c,Ceacam10,Cep85,Cib1,Clec16a,Cpeb4,Crb2,Cry1,Cry2,Ctdsp2,Ctdspl,Ctnnb1,Dab2ip,Dapk1,Dcun1d3,Dhx36,Dkk1,Dnajc10,Dtnbp1,Dusp1,Dusp10,Dusp22,Dusp6,Enc1,Enpp1,Ensa,Epha4,Epm2a,Eprs,Fam72a,Fbxo7,Fetub,Fnip1,Furin,Gabarapl2,Gadd45g,Gfra2,G…		Enhancers_Heart_10108,Enhancers_Heart_10208,Enhancers_Heart_10829,Enhancers_Heart_10833,Enhancers_Heart_10864,Enhancers_Heart_10865,Enhancers_Heart_10907,Enhancers_Heart_10909,Enhancers_Heart_10910,Enhancers_Heart_10929,Enhancers_Heart_10930,Enhancers_Heart_10931,Enhancers_Heart_11563,Enhancers_Heart_11573,Enhancers_Heart_11609,Enhancers_Heart_11612,Enhancers_Heart_12078,Enhancers_Heart_12333,Enh…
GO:0051248	negative regulation of protein metabolic process	1.32963	526	395.6	4.93e-09	1.23693	222	179.477	0.00451	Aatf,Adar,Adgrb1,Adora2a,Aida,Aida,Akap1,Angpt1,Anks1,App,Aqp1,Aqp11,Arl6ip1,Arpp19,Atg14,Atg7,Bag1,Bank1,Bcor,Bmp2,Bmp4,Bod1,C9orf72,Camk2n1,Cblc,Ccar2,Cd44,Cdkn1a,Cdkn1c,Ceacam10,Cep85,Cib1,Clec16a,Cpeb4,Crb2,Cry1,Cry2,Ctdsp2,Ctdspl,Ctnnb1,Dab2ip,Dapk1,Dcun1d3,Dhx36,Dkk1,Dnajc10,Dtnbp1,Dusp1,Dusp10,Dusp22,Dusp6,Edn1,Ednrb,Enc1,Enpp1,Ensa,Epha4,Epm2a,Eprs,Fam72a,Fbxo7,Fetub,Fnip1,Furin,Gabarapl2…		Enhancers_Heart_10108,Enhancers_Heart_10208,Enhancers_Heart_10829,Enhancers_Heart_10833,Enhancers_Heart_10864,Enhancers_Heart_10865,Enhancers_Heart_10907,Enhancers_Heart_10909,Enhancers_Heart_10910,Enhancers_Heart_10929,Enhancers_Heart_10930,Enhancers_Heart_10931,Enhancers_Heart_11563,Enhancers_Heart_11573,Enhancers_Heart_11609,Enhancers_Heart_11612,Enhancers_Heart_12078,Enhancers_Heart_12333,Enh…
GO:0071634	regulation of transforming growth factor beta production	2.92719	52	17.7645	4.93e-09	2.05581	13	6.32353	0.0498	Atp6ap2,Bmpr1a,Cd34,Furin,Hif1a,Hsp90ab1,Itgb6,Itgb8,Ltbp1,Ptgs2,Smad3,Smad4,Tgfb2		Enhancers_Heart_21078,Enhancers_Heart_21108,Enhancers_Heart_21114,Enhancers_Heart_21123,Enhancers_Heart_21125,Enhancers_Heart_21141,Enhancers_Heart_23358,Enhancers_Heart_23375,Enhancers_Heart_23376,Enhancers_Heart_23377,Enhancers_Heart_23378,Enhancers_Heart_29061,Enhancers_Heart_29065,Enhancers_Heart_29084,Enhancers_Heart_40998,Enhancers_Heart_42208,Enhancers_Heart_42211,Enhancers_Heart_42244,Enh…
GO:0001933	negative regulation of protein phosphorylation	1.54433	251	162.53	6.2e-09	1.55512	94	60.4455	0.000154	Adar,Adora2a,Aida,Aida,Angpt1,Atg14,Bag1,Bmp2,Bmp4,C9orf72,Camk2n1,Cblc,Cdkn1a,Cdkn1c,Ceacam10,Cep85,Cib1,Ctdsp2,Ctdspl,Dab2ip,Dkk1,Dnajc10,Dtnbp1,Dusp1,Dusp10,Dusp22,Dusp6,Enpp1,Epm2a,Fam72a,Fbxo7,Gadd45g,Gfra2,Gprc5a,Gskip,Hgf,Hipk3,Hspa4,Hspb1,Ibtk,Ifng,Igf1,Inpp5k,Jun,Kat2b,Lrp1,Lrp6,Macroh2a1,Mvp,Myocd,Nck1,Nck1,Npm1,Nppa,Nr2f2,Ntf3,Pard3,Pbk,Pebp1,Pik3cb,Pkig,Ppargc1a,Ppm1e,Ppm1f,Ppp1r15b,P…		Enhancers_Heart_10108,Enhancers_Heart_10829,Enhancers_Heart_10833,Enhancers_Heart_10907,Enhancers_Heart_10909,Enhancers_Heart_10910,Enhancers_Heart_10929,Enhancers_Heart_10930,Enhancers_Heart_10931,Enhancers_Heart_11563,Enhancers_Heart_11573,Enhancers_Heart_11609,Enhancers_Heart_11612,Enhancers_Heart_12078,Enhancers_Heart_12333,Enhancers_Heart_12372,Enhancers_Heart_14213,Enhancers_Heart_14919,Enh…
GO:1900038	negative regulation of cellular response to hypoxia	4.54603	29	6.37919	7.51e-09	3.30876	8	2.41782	0.0112	Cd34,Ddah1,Epha4,Map2k1,Nol3,Pik3cb,Pink1,Tmbim6		Enhancers_Heart_2264,Enhancers_Heart_2274,Enhancers_Heart_2294,Enhancers_Heart_2300,Enhancers_Heart_2301,Enhancers_Heart_2306,Enhancers_Heart_2307,Enhancers_Heart_2309,Enhancers_Heart_2310,Enhancers_Heart_35426,Enhancers_Heart_62689,Enhancers_Heart_62690,Enhancers_Heart_62692,Enhancers_Heart_62698,Enhancers_Heart_62699,Enhancers_Heart_62703,Enhancers_Heart_62715,Enhancers_Heart_67727,Enhancers_He…
GO:0061448	connective tissue development	2.07338	100	48.2304	8.23e-09	1.88535	27	14.3209	0.00791	Ap1s2,Arid5b,Arrdc3,Creb5,Dhrs7b,Ebf2,Enpp1,Foxa2,Guca2b,Hmga2,Klf7,Lep,Mkx,Nr1h4,Pgrmc2,Pik3ca,Ppargc1a,Pum2,Rarb,Rasal2,Rorc,Sh3pxd2b,Sorl1,Sptlc2,Tbl1xr1,Tgfb1,Tgfbr2		Enhancers_Heart_11001,Enhancers_Heart_12127,Enhancers_Heart_13529,Enhancers_Heart_13532,Enhancers_Heart_13533,Enhancers_Heart_13552,Enhancers_Heart_13557,Enhancers_Heart_14686,Enhancers_Heart_1687,Enhancers_Heart_1750,Enhancers_Heart_19158,Enhancers_Heart_22287,Enhancers_Heart_26153,Enhancers_Heart_26154,Enhancers_Heart_26155,Enhancers_Heart_26156,Enhancers_Heart_26161,Enhancers_Heart_26176,Enhan…
GO:0060612	adipose tissue development	2.28672	79	34.5474	8.24e-09	2.11229	22	10.4152	0.00486	Ap1s2,Arid5b,Arrdc3,Creb5,Dhrs7b,Ebf2,Enpp1,Guca2b,Hmga2,Klf7,Lep,Nr1h4,Pgrmc2,Pik3ca,Ppargc1a,Pum2,Rasal2,Rorc,Sh3pxd2b,Sorl1,Sptlc2,Tbl1xr1		Enhancers_Heart_11001,Enhancers_Heart_12127,Enhancers_Heart_13529,Enhancers_Heart_13532,Enhancers_Heart_13533,Enhancers_Heart_13552,Enhancers_Heart_13557,Enhancers_Heart_14686,Enhancers_Heart_1687,Enhancers_Heart_1750,Enhancers_Heart_19158,Enhancers_Heart_22287,Enhancers_Heart_26153,Enhancers_Heart_26154,Enhancers_Heart_26155,Enhancers_Heart_26156,Enhancers_Heart_26161,Enhancers_Heart_26176,Enhan…
GO:0015980	energy derivation by oxidation of organic compounds	1.74172	159	91.2891	9.96e-09	1.49949	70	46.6826	0.00399	Actn3,Adrb1,Adsl,Bnip3,Cat,Cavin3,Cox5a,Cox6c,Cox7a2,Cox7c,Cycs,Dnajc15,Dyrk2,Enpp1,Epm2a,Esrrb,Fxn,Gbe1,Gfpt1,Gm45837,Gnas,Gyg,Hif1a,Ifng,Igf1,Igf2,Inpp5k,Irs1,Iscu,Ldha,Lep,Mfn2,Mtfr2,Myc,Ndufa10,Ndufa8,Ndufs4,Ndufs6,Ndufv2,Nfatc3,Nr4a3,Oas1b,Pank2,Pgm1,Phka2,Phlda2,Pik3ca,Pink1,Ppargc1a,Ppif,Ppp1cb,Ppp1r3a,Ppp1r3b,Prkag2,Pygl,Pygm,Rb1cc1,S100b,Sdhb,Shmt2,Slc25a13,Sorbs1,Tigar,Trap1,Uqcc2,Uqcr1…		Enhancers_Heart_10219,Enhancers_Heart_10907,Enhancers_Heart_10909,Enhancers_Heart_10910,Enhancers_Heart_10929,Enhancers_Heart_10930,Enhancers_Heart_10931,Enhancers_Heart_12078,Enhancers_Heart_12093,Enhancers_Heart_12372,Enhancers_Heart_12658,Enhancers_Heart_15623,Enhancers_Heart_1750,Enhancers_Heart_20762,Enhancers_Heart_20764,Enhancers_Heart_20765,Enhancers_Heart_20767,Enhancers_Heart_21078,Enha…
GO:0030097	hemopoiesis	1.44039	330	229.105	1.05e-08	1.40605	125	88.9014	0.00077	Ada,Adar,Ahr,Ambra1,Angpt1,Anxa1,Arid1b,Arid2,Atg7,Bcr,Bmp4,Brd1,Card11,Cartpt,Cd34,Cd40lg,Cd44,Cdc73,Ceacam10,Ciapin1,Cib1,Csf3r,Ctnnb1,Dll1,Dtx1,Dusp10,Epas1,Erbb2,Ets1,Etv2,Fas,Fbxo7,Fbxw7,Fgfr3,Fos,Foxp1,Gabpa,Gli3,Gnas,Gpr68,Hcls1,Hif1a,Hlx,Hspa9,Hspb1,Ifng,Il10,Il15,Il17a,Inpp4b,Inpp5d,Jag1,Jun,Kat6a,Kat7,Kirrel3,Kitl,Klf13,Lag3,Lef1,Lep,Lif,Lrrc17,Mef2c,Mitf,Mmp14,Mturn,Myb,Myc,Myo1e,Notch…		Enhancers_Heart_10078,Enhancers_Heart_10208,Enhancers_Heart_10572,Enhancers_Heart_10829,Enhancers_Heart_10833,Enhancers_Heart_11640,Enhancers_Heart_11641,Enhancers_Heart_12078,Enhancers_Heart_12593,Enhancers_Heart_12615,Enhancers_Heart_15565,Enhancers_Heart_15570,Enhancers_Heart_15572,Enhancers_Heart_16896,Enhancers_Heart_16911,Enhancers_Heart_17154,Enhancers_Heart_18459,Enhancers_Heart_18469,Enh…
GO:0008217	regulation of blood pressure	1.72109	163	94.7076	1.08e-08	1.71801	54	31.4317	0.000718	Acta2,Adamts16,Adra1a,Adrb1,Ahr,Anpep,Ar,Atp1a1,Atp2b1,Avpr1b,Cacna1c,Camk2n1,Cartpt,Cd34,Col1a2,Corin,Crh,Crhr2,Ddah1,Dll1,Edn1,Edn2,Ednrb,Enpep,Ext1,Ext2,Gch1,Gja5,Gna12,Gnas,Guca2b,Gucy1a1,Kcnq1,Lep,Myh6,Nampt,Ncald,Nedd4l,Nppa,Npy,Nr2f2,Nr3c2,Pik3r1,Pmch,Ppara,Ptgs2,Rasl10b,Ren1,Rnls,Rps6ka2,Smad3,Stk39,Vegfc,Wnk1		Enhancers_Heart_10929,Enhancers_Heart_10930,Enhancers_Heart_10931,Enhancers_Heart_11533,Enhancers_Heart_11534,Enhancers_Heart_11547,Enhancers_Heart_11551,Enhancers_Heart_16194,Enhancers_Heart_16195,Enhancers_Heart_16196,Enhancers_Heart_16205,Enhancers_Heart_16206,Enhancers_Heart_19882,Enhancers_Heart_19889,Enhancers_Heart_20060,Enhancers_Heart_20064,Enhancers_Heart_20085,Enhancers_Heart_24673,Enh…
GO:1990874	vascular associated smooth muscle cell proliferation	2.12485	91	42.8266	1.17e-08	2.29408	32	13.949	7.22e-05	Adamts1,Bmpr1a,Camk2d,Cdkn1a,Cnn1,Ddit3,Ddr2,Edn1,Enpp1,Ern1,Fgf9,Gna12,Gnai3,Hpgd,Igf1,Igfbp5,Il10,Jun,Mef2c,Mef2d,Mfn2,Mmp9,Myocd,Nr4a3,Pak1,Ppargc1a,Prkg1,Pten,Src,Tafa5,Tgfb3,Tpm1		Enhancers_Heart_10907,Enhancers_Heart_10909,Enhancers_Heart_10910,Enhancers_Heart_10929,Enhancers_Heart_10930,Enhancers_Heart_10931,Enhancers_Heart_12354,Enhancers_Heart_14919,Enhancers_Heart_17696,Enhancers_Heart_1967,Enhancers_Heart_22111,Enhancers_Heart_22115,Enhancers_Heart_22118,Enhancers_Heart_24673,Enhancers_Heart_26195,Enhancers_Heart_26212,Enhancers_Heart_26213,Enhancers_Heart_26227,Enha…
GO:0031400	negative regulation of protein modification process	1.43542	331	230.594	1.36e-08	1.37394	127	92.4352	0.00162	Adar,Adgrb1,Adora2a,Aida,Aida,Akap1,Angpt1,Arpp19,Atg14,Atg7,Bag1,Bcor,Bmp2,Bmp4,Bod1,C9orf72,Camk2n1,Cblc,Cdkn1a,Cdkn1c,Ceacam10,Cep85,Cib1,Cry1,Cry2,Ctdsp2,Ctdspl,Ctnnb1,Dab2ip,Dcun1d3,Dkk1,Dnajc10,Dtnbp1,Dusp1,Dusp10,Dusp22,Dusp6,Enpp1,Ensa,Epm2a,Fam72a,Fbxo7,Gadd45g,Gfra2,Gprc5a,Gskip,Hdac8,Hgf,Hhatl,Hipk3,Hmg20a,Hspa4,Hspb1,Ibtk,Ifng,Igf1,Ikbkb,Inpp5k,Jarid2,Jun,Kat2b,Klhl40,Limk1,Lrp1,Lrp6,…		Enhancers_Heart_10108,Enhancers_Heart_10208,Enhancers_Heart_10829,Enhancers_Heart_10833,Enhancers_Heart_10907,Enhancers_Heart_10909,Enhancers_Heart_10910,Enhancers_Heart_10929,Enhancers_Heart_10930,Enhancers_Heart_10931,Enhancers_Heart_11563,Enhancers_Heart_11573,Enhancers_Heart_11609,Enhancers_Heart_11612,Enhancers_Heart_12078,Enhancers_Heart_12333,Enhancers_Heart_12372,Enhancers_Heart_13424,Enh…
GO:0051098	regulation of binding	1.48815	277	186.137	1.63e-08	1.54395	114	73.8366	3.17e-05	1700009N14Rik,Add1,Amfr,Angpt1,App,Arhgap28,Atp2a3,Bambi,Blk,Blm,Bmp2,Bmp4,C9orf72,Calm1,Camk1,Carm1,Cdc42,Cdkn1a,Cdon,Ctnnb1,Cycs,Dact1,Ddit3,Dhrs7b,Disc1,Dkk1,Dtnbp1,E2f1,Ebf2,Epb41l5,Epha4,Ercc4,Fbxw7,Habp4,Hand1,Hand2,Hdac4,Hey1,Hipk2,Hipk3,Hmbox1,Hmbox1,Hmga2,Hsp90ab1,Hspa4,Ifng,Igf1,Il10,Irf4,Jun,Lamtor5,Lef1,Lhx2,Lif,Lrp1,Mecp2,Mfn2,Mmp9,Myc,Myocd,Nek2,Nfib,Ngf,Niban2,Nmd3,Nphp3,Nucks1,P2r…		Enhancers_Heart_10572,Enhancers_Heart_10907,Enhancers_Heart_10909,Enhancers_Heart_10910,Enhancers_Heart_10929,Enhancers_Heart_10930,Enhancers_Heart_10931,Enhancers_Heart_12078,Enhancers_Heart_12127,Enhancers_Heart_12354,Enhancers_Heart_12372,Enhancers_Heart_12593,Enhancers_Heart_12615,Enhancers_Heart_1319,Enhancers_Heart_1324,Enhancers_Heart_1327,Enhancers_Heart_14213,Enhancers_Heart_14474,Enhanc…
GO:0061035	regulation of cartilage development	2.00678	103	51.326	1.66e-08	2.48775	31	12.4611	1.74e-05	Adamts7,Bmp1,Bmp10,Bmp2,Bmp4,Chadl,Ctnnb1,Frzb,Gli2,Gli3,Lep,Loxl2,Maf,Mkx,Pkdcc,Por,Pthlh,Rarb,Runx2,Shox2,Smad3,Smad7,Smpd3,Sox6,Sox9,Tgfb1,Tgfb2,Thrb,Trps1,Wnt5a,Zbtb16		Enhancers_Heart_18073,Enhancers_Heart_23765,Enhancers_Heart_27832,Enhancers_Heart_27833,Enhancers_Heart_27834,Enhancers_Heart_27845,Enhancers_Heart_27846,Enhancers_Heart_27869,Enhancers_Heart_27870,Enhancers_Heart_27884,Enhancers_Heart_27886,Enhancers_Heart_27887,Enhancers_Heart_27895,Enhancers_Heart_27899,Enhancers_Heart_27923,Enhancers_Heart_27925,Enhancers_Heart_27935,Enhancers_Heart_27941,Enh…
GO:0030029	actin filament-based process	1.35167	446	329.962	1.8e-08	1.68371	212	125.913	1.57e-12	1700009N14Rik,Ablim3,Abr,Acap2,Acta2,Actc1,Actn1,Actn3,Actn4,Add1,Adgrb1,Adrb1,Akap13,Akap6,Amot,Amotl1,Amotl2,Anxa1,Aqp1,Arap1,Arf6,Arhgap26,Arhgap26,Arhgap28,Arhgap35,Arhgap44,Arhgef10,Arhgef10l,Arpc5l,Atp1a1,Atp2c1,Auts2,Auts2,Bcas3,Bcr,Bmp10,C9orf72,Cacna1c,Camk2d,Capzb,Cavin3,Cavin4,Ccdc88c,Cdc42,Cdc42ep3,Celsr1,Cnn1,Cnn3,Coro2b,Ctnna3,Cttn,Cyria,Cyrib,Daam1,Daam2,Dbn1,Diaph2,Diaph3,Dlc1,Dlg…		Enhancers_Heart_10078,Enhancers_Heart_10108,Enhancers_Heart_1078,Enhancers_Heart_1087,Enhancers_Heart_10949,Enhancers_Heart_10980,Enhancers_Heart_10981,Enhancers_Heart_10983,Enhancers_Heart_11001,Enhancers_Heart_12372,Enhancers_Heart_13290,Enhancers_Heart_13529,Enhancers_Heart_13532,Enhancers_Heart_13533,Enhancers_Heart_13552,Enhancers_Heart_13557,Enhancers_Heart_14676,Enhancers_Heart_14919,Enhan…
GO:0032332	positive regulation of chondrocyte differentiation	2.7499	53	19.2735	1.93e-08	3.11285	11	3.53374	0.00357	Gli3,Loxl2,Pkdcc,Por,Runx2,Smad3,Smad7,Sox6,Sox9,Thrb,Zbtb16		Enhancers_Heart_18073,Enhancers_Heart_23765,Enhancers_Heart_27884,Enhancers_Heart_27886,Enhancers_Heart_27887,Enhancers_Heart_27895,Enhancers_Heart_27899,Enhancers_Heart_27923,Enhancers_Heart_27925,Enhancers_Heart_27935,Enhancers_Heart_27941,Enhancers_Heart_27942,Enhancers_Heart_27943,Enhancers_Heart_27950,Enhancers_Heart_27951,Enhancers_Heart_27960,Enhancers_Heart_27965,Enhancers_Heart_30419,Enh…
GO:0070482	response to oxygen levels	1.6874	168	99.5615	2.45e-08	1.4161	64	45.1947	0.0206	Ada,Adam17,Alkbh5,Aqp1,Arnt2,Atg7,Atp1b1,Bmp2,Bnip3,Camk2d,Cat,Cd34,Chrnb2,Cpeb4,Cr1l,Ddah1,Edn1,Egln3,Epas1,Epha4,Fas,Flt1,Fosl2,Foxo1,Gucy1a1,Gucy1b1,Hif1a,Itpr1,Kcnma1,Loxl2,Map2k1,Mecp2,Myc,Ndnf,Ndufs4,Nfatc3,Nol3,Pak1,Pgf,Pik3cb,Pink1,Ppara,Prkce,Pten,Ptgis,Pygm,Raf1,Rora,Rtn4,Scn2a,Slc8a1,Slc9a1,Smad3,Smad4,Tacc3,Tgfb2,Tgfb3,Th,Tigar,Tmbim6,Vegfa,Vegfc,Vldlr,Zfp36l1		Enhancers_Heart_13255,Enhancers_Heart_13265,Enhancers_Heart_13490,Enhancers_Heart_13495,Enhancers_Heart_13511,Enhancers_Heart_14676,Enhancers_Heart_19615,Enhancers_Heart_19616,Enhancers_Heart_20503,Enhancers_Heart_20514,Enhancers_Heart_20521,Enhancers_Heart_21078,Enhancers_Heart_21108,Enhancers_Heart_21114,Enhancers_Heart_21123,Enhancers_Heart_21125,Enhancers_Heart_21141,Enhancers_Heart_21489,Enh…
GO:0036293	response to decreased oxygen levels	1.71451	156	90.9883	3.04e-08	1.45725	58	39.8011	0.017	Ada,Adam17,Alkbh5,Aqp1,Arnt2,Atp1b1,Bmp2,Bnip3,Camk2d,Cat,Cd34,Chrnb2,Cpeb4,Cr1l,Ddah1,Edn1,Egln3,Epas1,Epha4,Flt1,Fosl2,Hif1a,Itpr1,Kcnma1,Loxl2,Map2k1,Mecp2,Myc,Ndnf,Nfatc3,Nol3,Pak1,Pgf,Pik3cb,Pink1,Ppara,Prkce,Pten,Ptgis,Pygm,Raf1,Rora,Rtn4,Scn2a,Slc8a1,Slc9a1,Smad3,Smad4,Tacc3,Tgfb2,Tgfb3,Th,Tigar,Tmbim6,Vegfa,Vegfc,Vldlr,Zfp36l1		Enhancers_Heart_13255,Enhancers_Heart_13265,Enhancers_Heart_13490,Enhancers_Heart_13495,Enhancers_Heart_13511,Enhancers_Heart_14676,Enhancers_Heart_19615,Enhancers_Heart_19616,Enhancers_Heart_20503,Enhancers_Heart_20514,Enhancers_Heart_20521,Enhancers_Heart_21078,Enhancers_Heart_21108,Enhancers_Heart_21114,Enhancers_Heart_21123,Enhancers_Heart_21125,Enhancers_Heart_21141,Enhancers_Heart_21489,Enh…
GO:0030334	regulation of cell migration	1.26717	641	505.853	3.55e-08	1.54855	269	173.711	8.82e-12	Abcc1,Abcc8,Abhd2,Abhd6,Abr,Ackr3,Acp5,Acta2,Actn4,Acvr1,Ada,Adam17,Adamts1,Adamts9,Adgrb1,Adgrg1,Adipor2,Adora3,Afdn,Akap12,Amot,Amotl1,Amotl2,Angpt1,Ano6,Anxa1,App,Appl1,Aqp1,Arap3,Arf6,Arhgap5,Arhgef2,Arhgef39,Arid2,Arid4a,Arsb,Bcas3,Bcr,Bmp10,Bmp2,Bmp4,Bmper,Bmpr1a,Camk2a,Camk2d,Capn7,Ccbe1,Ccl12,Cd40,Cdh13,Ceacam10,Cemip,Chst2,Cib1,Cmklr1,Ctsh,Cxcl12,Cxcl17,Cyp19a1,Cyrib,Dab2ip,Dach1,Dapk2,D…		Enhancers_Heart_10078,Enhancers_Heart_104,Enhancers_Heart_10907,Enhancers_Heart_10909,Enhancers_Heart_10910,Enhancers_Heart_10929,Enhancers_Heart_10930,Enhancers_Heart_10931,Enhancers_Heart_11640,Enhancers_Heart_11641,Enhancers_Heart_11906,Enhancers_Heart_11910,Enhancers_Heart_12078,Enhancers_Heart_12372,Enhancers_Heart_129,Enhancers_Heart_13255,Enhancers_Heart_13265,Enhancers_Heart_14466,Enhance…
GO:0030099	myeloid cell differentiation	1.51272	245	161.959	3.91e-08	1.44585	96	66.3971	0.00169	Actn1,Adar,Add1,Batf,Bmp4,Brd1,Cartpt,Cdc73,Cdkn1c,Ceacam10,Cebpe,Chuk,Cib1,Csf2,Csf3r,Ctnnb1,Dhrs7b,Dll1,Enpp1,Epas1,Epha2,Ets1,Etv2,Fas,Fbxw7,Fgfr3,Fos,Foxp1,Gabpa,Gnas,Gpc3,Gpr68,Hcls1,Hif1a,Hspa9,Ifng,Il15,Il17a,Il17c,Inpp4b,Inpp5d,Irf4,Irf8,Itgb6,Itgb8,Jag1,Jun,Kat6a,Kat7,Kcnq1,Kitl,Klf13,Kmt2e,Lef1,Lep,Lif,Lrrc17,Mef2c,Mfhas1,Mitf,Mturn,Myb,Myc,Nfe2l1,Notch2,Pik3r1,Plcb1,Pou4f1,Ppargc1b,Ppp…		Enhancers_Heart_10572,Enhancers_Heart_11640,Enhancers_Heart_11641,Enhancers_Heart_12078,Enhancers_Heart_12593,Enhancers_Heart_12615,Enhancers_Heart_14294,Enhancers_Heart_14686,Enhancers_Heart_16896,Enhancers_Heart_16911,Enhancers_Heart_17028,Enhancers_Heart_202,Enhancers_Heart_21078,Enhancers_Heart_21108,Enhancers_Heart_21114,Enhancers_Heart_21123,Enhancers_Heart_21125,Enhancers_Heart_21141,Enhan…
GO:1903522	regulation of blood circulation	1.55186	220	141.765	4.21e-08	1.73817	75	43.1488	2.45e-05	Ada,Adra1a,Adrb1,Ahr,Akap6,App,Atp1a1,Atp1b1,Atp2b1,Avpr1b,Bmp10,Cacna1c,Cacna2d1,Calm1,Calm2,Chrm2,Crhr2,Ctnna3,Dlg1,Dock4,Dock5,Edn1,Edn2,Ednrb,Ehd3,Epas1,Gata4,Gch1,Gja5,Gja6,Gnao1,Hcn4,Hdac4,Hif1a,Hrh2,Ifng,Irx5,Jup,Kcna5,Kcnj2,Kcnj5,Kcnq1,Lep,Map2k1,Mef2a,Myh6,Nos1ap,Nppa,Pde4b,Pde5a,Pebp1,Pik3r1,Pln,Pmch,Ptger2,Ptgs2,Rgs2,Sema3a,Shox2,Slc4a3,Slc8a1,Slc9a1,Smad7,Sp4,Srebf1,Stc1,Tbx5,Tgfb2,Th…		Enhancers_Heart_10929,Enhancers_Heart_10930,Enhancers_Heart_10931,Enhancers_Heart_11533,Enhancers_Heart_11534,Enhancers_Heart_11547,Enhancers_Heart_11551,Enhancers_Heart_12078,Enhancers_Heart_14640,Enhancers_Heart_14641,Enhancers_Heart_14643,Enhancers_Heart_14655,Enhancers_Heart_17274,Enhancers_Heart_18039,Enhancers_Heart_18045,Enhancers_Heart_18046,Enhancers_Heart_18049,Enhancers_Heart_18057,Enh…
GO:0003013	circulatory system process	1.43767	308	214.235	4.7e-08	1.72516	120	69.5589	4.98e-08	Abcc1,Abcc8,Abr,Acta2,Actc1,Ada,Adcy6,Adora2a,Adra1a,Adrb1,Ahr,Akap12,Akap6,Amot,Angpt1,App,Arhgap35,Atp1a1,Atp1b1,Atp2b1,Avpr1b,Bbs2,Bcr,Bmp10,Cacna1c,Cacna2d1,Calm1,Calm2,Cdc42,Ceacam10,Chd7,Chrm2,Crhr2,Crp,Ctnna3,Ddah1,Dlg1,Dock4,Dock5,Edn1,Edn2,Ednrb,Ehd3,Epas1,Ext1,Ext2,Fabp5,Fli1,Gata4,Gch1,Gja5,Gja6,Gm45837,Gnao1,Hcn4,Hdac4,Hif1a,Hrh2,Ifng,Immp2l,Irx5,Jup,Kcna5,Kcnj2,Kcnj5,Kcnma1,Kcnq1,Lep…		Enhancers_Heart_10078,Enhancers_Heart_10108,Enhancers_Heart_10929,Enhancers_Heart_10930,Enhancers_Heart_10931,Enhancers_Heart_11533,Enhancers_Heart_11534,Enhancers_Heart_11547,Enhancers_Heart_11551,Enhancers_Heart_12078,Enhancers_Heart_12372,Enhancers_Heart_14640,Enhancers_Heart_14641,Enhancers_Heart_14643,Enhancers_Heart_14655,Enhancers_Heart_15169,Enhancers_Heart_15729,Enhancers_Heart_15730,Enh…
GO:0001666	response to hypoxia	1.71343	153	89.2948	5.03e-08	1.52475	57	37.3832	0.00789	Ada,Adam17,Alkbh5,Aqp1,Arnt2,Atp1b1,Bmp2,Bnip3,Camk2d,Cat,Cd34,Chrnb2,Cr1l,Ddah1,Edn1,Egln3,Epas1,Epha4,Flt1,Fosl2,Hif1a,Itpr1,Kcnma1,Loxl2,Map2k1,Mecp2,Myc,Ndnf,Nfatc3,Nol3,Pak1,Pgf,Pik3cb,Pink1,Ppara,Prkce,Pten,Ptgis,Pygm,Raf1,Rora,Rtn4,Scn2a,Slc8a1,Slc9a1,Smad3,Smad4,Tacc3,Tgfb2,Tgfb3,Th,Tigar,Tmbim6,Vegfa,Vegfc,Vldlr,Zfp36l1		Enhancers_Heart_13255,Enhancers_Heart_13265,Enhancers_Heart_14676,Enhancers_Heart_19615,Enhancers_Heart_19616,Enhancers_Heart_20503,Enhancers_Heart_20514,Enhancers_Heart_20521,Enhancers_Heart_21078,Enhancers_Heart_21108,Enhancers_Heart_21114,Enhancers_Heart_21123,Enhancers_Heart_21125,Enhancers_Heart_21141,Enhancers_Heart_21489,Enhancers_Heart_21545,Enhancers_Heart_21547,Enhancers_Heart_22032,Enh…
GO:0001570	vasculogenesis	1.90509	110	57.7401	6.15e-08	2.56617	42	16.3668	1.05e-07	Ackr3,Amot,Angpt1,Cd34,Ceacam10,Ctnnb1,Enpp1,Epha2,Fbxw7,Fgf1,Fgf9,Foxf1,Fzd4,Gata4,Has2,Hdac7,Hey1,Itgb8,Myo18b,Myo1e,Myocd,Ntrk2,Pbrm1,Ptprj,Qki,Rap1a,Rapgef2,Rin2,Rtn4,T,Tgfb1,Tgfbr2,Tgfbr3,Tiparp,Tmem100,Wars2,Wnt7b,Wt1,Xdh,Zfp36l1,Zfpm2,Zmiz1		Enhancers_Heart_13255,Enhancers_Heart_13265,Enhancers_Heart_14919,Enhancers_Heart_16690,Enhancers_Heart_21489,Enhancers_Heart_21545,Enhancers_Heart_21547,Enhancers_Heart_23358,Enhancers_Heart_23375,Enhancers_Heart_23376,Enhancers_Heart_23377,Enhancers_Heart_23378,Enhancers_Heart_25620,Enhancers_Heart_25625,Enhancers_Heart_28319,Enhancers_Heart_28320,Enhancers_Heart_28323,Enhancers_Heart_28329,Enh…
GO:1904705	regulation of vascular associated smooth muscle cell proliferation	2.08161	87	41.7945	6.29e-08	2.20962	30	13.577	0.00028	Adamts1,Bmpr1a,Camk2d,Cdkn1a,Cnn1,Ddr2,Edn1,Ern1,Fgf9,Gna12,Gnai3,Hpgd,Igf1,Igfbp5,Il10,Jun,Mef2c,Mef2d,Mfn2,Mmp9,Myocd,Nr4a3,Pak1,Ppargc1a,Prkg1,Pten,Src,Tafa5,Tgfb3,Tpm1		Enhancers_Heart_10907,Enhancers_Heart_10909,Enhancers_Heart_10910,Enhancers_Heart_10929,Enhancers_Heart_10930,Enhancers_Heart_10931,Enhancers_Heart_14919,Enhancers_Heart_17696,Enhancers_Heart_1967,Enhancers_Heart_22111,Enhancers_Heart_22115,Enhancers_Heart_22118,Enhancers_Heart_24673,Enhancers_Heart_26195,Enhancers_Heart_26212,Enhancers_Heart_26213,Enhancers_Heart_26227,Enhancers_Heart_26239,Enha…
GO:0043551	regulation of phosphatidylinositol 3-kinase activity	2.7165	50	18.406	7.1e-08	2.41953	18	7.43945	0.00274	Ambra1,App,Atg14,Cdc42,Dab2ip,Fgfr3,Fgr,Flt1,Irs1,Pik3r1,Pik3r3,Pik3r4,Ptk2b,Rubcn,Src,Tgfb1,Tnfaip8l3,Vav3		Enhancers_Heart_2407,Enhancers_Heart_2411,Enhancers_Heart_2418,Enhancers_Heart_2423,Enhancers_Heart_26806,Enhancers_Heart_26841,Enhancers_Heart_26856,Enhancers_Heart_26857,Enhancers_Heart_26861,Enhancers_Heart_26886,Enhancers_Heart_26888,Enhancers_Heart_26889,Enhancers_Heart_26893,Enhancers_Heart_26897,Enhancers_Heart_26899,Enhancers_Heart_30210,Enhancers_Heart_37111,Enhancers_Heart_38371,Enhance…
GO:0044262	cellular carbohydrate metabolic process	1.59603	191	119.672	7.96e-08	1.53074	80	52.2621	0.00101	Actn3,Adrb1,Akr1b3,Aoah,Arpp19,Avpr1b,B3gnt2,B3gnt7,B4galt1,B4galt5,C1qtnf3,Cry1,Csgalnact1,Dusp12,Dyrk2,Enpp1,Epm2a,Esrrb,Ext1,Ext2,Fbp2,Fggy,Foxa2,Foxk1,Foxo1,Gbe1,Gfpt1,Git1,Gyg,Has2,Hdac4,Hif1a,Hs2st1,Idh2,Igf1,Igf2,Inpp1,Inpp4b,Inpp5a,Inpp5k,Irs1,Kat2b,Lep,Mecp2,Mtmr2,Ndst1,Neu2,Nfe2l1,Nln,Nr3c1,P2ry1,Pdk2,Pfkfb2,Pgm1,Phka2,Phlda2,Pla2g4a,Pou1f1,Ppara,Ppargc1a,Ppp1cb,Ppp1r3a,Ppp1r3b,Prkag2,P…		Enhancers_Heart_10907,Enhancers_Heart_10909,Enhancers_Heart_10910,Enhancers_Heart_10929,Enhancers_Heart_10930,Enhancers_Heart_10931,Enhancers_Heart_1171,Enhancers_Heart_12078,Enhancers_Heart_12093,Enhancers_Heart_13168,Enhancers_Heart_15623,Enhancers_Heart_15851,Enhancers_Heart_16882,Enhancers_Heart_16884,Enhancers_Heart_16885,Enhancers_Heart_17028,Enhancers_Heart_20762,Enhancers_Heart_20764,Enha…
GO:0071495	cellular response to endogenous stimulus	1.2979	522	402.189	9.13e-08	1.53621	222	144.511	1.81e-09	1700037H04Rik,Abcc1,Acaca,Acap2,Acod1,Acvr1,Adam17,Adamts7,Adcy6,Adcy8,Ahr,Akap6,Ano1,Anxa1,App,Aqp1,Ar,Arf6,Arhgef2,Arid4a,Atp1a1,Atp2b1,Bambi,Bcas3,Bglap2,Blm,Bmp2,Bmp4,Bmpr1a,Bmpr1b,Cacna2d1,Casp7,Castor1,Castor2,Cav2,Cd44,Cdkn1c,Cdkn2b,Ceacam10,Chmp5,Cib1,Cilp,Col1a2,Col4a6,Cpeb4,Crh,Crhr2,Ctnna1,Ctnnb1,Cyp11a1,Dab2ip,Dbn1,Dnmt3a,Dusp22,E2f1,Edn1,Efna5,Ehd1,Eme1,Enpp1,Epb41l5,Epha4,Eprs,Erbb2…		Enhancers_Heart_10572,Enhancers_Heart_10907,Enhancers_Heart_10909,Enhancers_Heart_10910,Enhancers_Heart_10929,Enhancers_Heart_10930,Enhancers_Heart_10931,Enhancers_Heart_11001,Enhancers_Heart_11533,Enhancers_Heart_11534,Enhancers_Heart_11547,Enhancers_Heart_11551,Enhancers_Heart_12372,Enhancers_Heart_12586,Enhancers_Heart_12593,Enhancers_Heart_13490,Enhancers_Heart_13495,Enhancers_Heart_13511,Enh…
GO:0008015	blood circulation	1.53041	222	145.059	9.82e-08	1.74744	78	44.6367	1.34e-05	Ada,Adra1a,Adrb1,Ahr,Akap6,App,Atp1a1,Atp1b1,Atp2b1,Avpr1b,Bmp10,Cacna1c,Cacna2d1,Calm1,Calm2,Chd7,Chrm2,Crhr2,Ctnna3,Dlg1,Dock4,Dock5,Edn1,Edn2,Ednrb,Ehd3,Epas1,Fli1,Gata4,Gch1,Gja5,Gja6,Gnao1,Hcn4,Hdac4,Hif1a,Hrh2,Ifng,Immp2l,Irx5,Jup,Kcna5,Kcnj2,Kcnj5,Kcnq1,Lep,Map2k1,Mef2a,Myh6,Nos1ap,Nppa,Pde4b,Pde5a,Pebp1,Pik3r1,Pln,Pmch,Ptger2,Ptgs2,Rgs2,Sema3a,Shox2,Slc4a3,Slc8a1,Slc9a1,Smad7,Sp4,Srebf1,S…		Enhancers_Heart_10929,Enhancers_Heart_10930,Enhancers_Heart_10931,Enhancers_Heart_11533,Enhancers_Heart_11534,Enhancers_Heart_11547,Enhancers_Heart_11551,Enhancers_Heart_12078,Enhancers_Heart_14640,Enhancers_Heart_14641,Enhancers_Heart_14643,Enhancers_Heart_14655,Enhancers_Heart_17274,Enhancers_Heart_18039,Enhancers_Heart_18045,Enhancers_Heart_18046,Enhancers_Heart_18049,Enhancers_Heart_18057,Enh…
GO:1904707	positive regulation of vascular associated smooth muscle cell proliferation	2.45093	59	24.0725	9.94e-08	2.49166	19	7.62544	0.00134	Adamts1,Bmpr1a,Camk2d,Ddr2,Edn1,Ern1,Fgf9,Gnai3,Hpgd,Igf1,Igfbp5,Jun,Mef2d,Mfn2,Mmp9,Nr4a3,Pak1,Ppargc1a,Src		Enhancers_Heart_10907,Enhancers_Heart_10909,Enhancers_Heart_10910,Enhancers_Heart_10929,Enhancers_Heart_10930,Enhancers_Heart_10931,Enhancers_Heart_17696,Enhancers_Heart_1967,Enhancers_Heart_24673,Enhancers_Heart_29061,Enhancers_Heart_29065,Enhancers_Heart_29084,Enhancers_Heart_29719,Enhancers_Heart_38437,Enhancers_Heart_38438,Enhancers_Heart_38442,Enhancers_Heart_56735,Enhancers_Heart_57164,Enha…
GO:0006006	glucose metabolic process	1.70887	145	84.8516	1.33e-07	1.38836	55	39.6151	0.047	Actn3,Arpp19,Atf3,C1qtnf3,Cry1,Dusp12,Dyrk2,Enpp1,Esrrb,Fabp5,Fbp2,Foxa2,Foxk1,Foxo1,Gfpt1,Gpi1,H6pd,Hif1a,Igf1,Igf2,Inpp5k,Irs1,Kat2b,Kcnj11,Kcnq1,Ldha,Lep,Myc,Nfe2l1,Nln,Nr3c1,Oas1b,Pdk2,Pfkfb2,Pfkp,Pgm1,Pgm5,Phlda2,Pik3ca,Pik3r1,Ppara,Ppargc1a,Ppp1cb,Ppp1r3a,Ppp1r3b,Rora,Rorc,Sds,Sik1,Slc39a14,Slc45a3,Soga1,Sorbs1,Src,Tigar		Enhancers_Heart_10907,Enhancers_Heart_10909,Enhancers_Heart_10910,Enhancers_Heart_10929,Enhancers_Heart_10930,Enhancers_Heart_10931,Enhancers_Heart_12078,Enhancers_Heart_12093,Enhancers_Heart_15623,Enhancers_Heart_16882,Enhancers_Heart_16884,Enhancers_Heart_16885,Enhancers_Heart_17028,Enhancers_Heart_1750,Enhancers_Heart_21078,Enhancers_Heart_21108,Enhancers_Heart_21114,Enhancers_Heart_21123,Enha…
GO:2000145	regulation of cell motility	1.25214	649	518.313	1.41e-07	1.51272	276	182.453	5.79e-11	Abcc1,Abcc8,Abhd2,Abhd6,Abr,Ackr3,Acp5,Acta2,Actn4,Acvr1,Ada,Adam17,Adamts1,Adamts9,Adgrb1,Adgrg1,Adipor2,Adora3,Afdn,Akap12,Amot,Amotl1,Amotl2,Angpt1,Ano6,Anxa1,App,Appl1,Aqp1,Arap3,Arf6,Arhgap5,Arhgef2,Arhgef39,Arid2,Arid4a,Arsb,Bbs1,Bbs2,Bcas3,Bcr,Bmp10,Bmp2,Bmp4,Bmper,Bmpr1a,Camk2a,Camk2d,Capn7,Ccbe1,Ccdc25,Ccl12,Cd40,Cdh13,Ceacam10,Cemip,Chst2,Cib1,Cmklr1,Ctnna1,Ctsh,Cxcl12,Cxcl17,Cyp19a1,Cy…		Enhancers_Heart_10078,Enhancers_Heart_104,Enhancers_Heart_10572,Enhancers_Heart_10907,Enhancers_Heart_10909,Enhancers_Heart_10910,Enhancers_Heart_10929,Enhancers_Heart_10930,Enhancers_Heart_10931,Enhancers_Heart_11640,Enhancers_Heart_11641,Enhancers_Heart_11906,Enhancers_Heart_11910,Enhancers_Heart_12078,Enhancers_Heart_12372,Enhancers_Heart_129,Enhancers_Heart_13255,Enhancers_Heart_13265,Enhance…
GO:0009719	response to endogenous stimulus	1.26577	596	470.861	1.63e-07	1.43343	261	182.081	2.6e-08	1700037H04Rik,Abcc1,Abhd2,Acaca,Acap2,Acod1,Acvr1,Adam17,Adamts7,Adcy6,Adcy8,Adra1a,Ahr,Akap6,Ano1,Anxa1,App,Aqp1,Ar,Areg,Arf6,Arhgef2,Arid4a,Arsb,Atp1a1,Atp2b1,Bambi,Bbs2,Bcas3,Bglap2,Blm,Bmp2,Bmp4,Bmpr1a,Bmpr1b,Cacna2d1,Casp7,Castor1,Castor2,Cav2,Cd44,Cdkn1c,Cdkn2b,Ceacam10,Chmp5,Chuk,Cib1,Cilp,Col1a2,Col4a6,Cpeb4,Crh,Crhr2,Crls1,Cry1,Cry2,Ctnna1,Ctnnb1,Cyp11a1,Dab2ip,Dbn1,Ddit3,Dnmt3a,Dusp22,E…		Enhancers_Heart_10572,Enhancers_Heart_10829,Enhancers_Heart_10833,Enhancers_Heart_10864,Enhancers_Heart_10865,Enhancers_Heart_10907,Enhancers_Heart_10909,Enhancers_Heart_10910,Enhancers_Heart_10929,Enhancers_Heart_10930,Enhancers_Heart_10931,Enhancers_Heart_11001,Enhancers_Heart_11533,Enhancers_Heart_11534,Enhancers_Heart_11547,Enhancers_Heart_11551,Enhancers_Heart_12354,Enhancers_Heart_12372,Enh…
GO:0045778	positive regulation of ossification	1.97713	92	46.5321	1.86e-07	2.30432	24	10.4152	0.000811	Actn3,Acvr1,Adgrv1,Ano6,Atp2b1,Bmp2,Bmp4,Bmpr1a,Bmpr1b,Fam20c,Fgfr3,Lrp6,Mef2c,Nipbl,Pkdcc,Ptn,Runx2,Scube2,Slc8a1,Smad3,Tent5a,Thrb,Wnt5a,Zbtb16		Enhancers_Heart_11533,Enhancers_Heart_11534,Enhancers_Heart_11547,Enhancers_Heart_11551,Enhancers_Heart_26153,Enhancers_Heart_26154,Enhancers_Heart_26155,Enhancers_Heart_26156,Enhancers_Heart_26161,Enhancers_Heart_26176,Enhancers_Heart_26195,Enhancers_Heart_26212,Enhancers_Heart_26213,Enhancers_Heart_26227,Enhancers_Heart_26239,Enhancers_Heart_26247,Enhancers_Heart_26248,Enhancers_Heart_27884,Enh…
GO:0032870	cellular response to hormone stimulus	1.48708	241	162.063	2.31e-07	1.52069	84	55.2379	0.000866	Acaca,Acod1,Adcy6,Adcy8,Anxa1,Aqp1,Ar,Atp1a1,Atp2b1,Bcas3,Bglap2,Bmp4,Ceacam10,Crhr2,Ctnnb1,Cyp11a1,Edn1,Efna5,Enpp1,Eprs,Esr1,Fbxo32,Foxo1,Gata4,Gdnf,Glp2r,Gnas,Grb14,Hdac9,Igf1,Igf1r,Igf2,Il17a,Inpp5k,Irs1,Kat2b,Klf9,Lep,Lpin1,Lpl,Mef2c,Mfn2,Myo1c,Myo5a,Nck1,Nck1,Nfe2l2,Nr1h4,Nr3c1,Nr4a3,Nucks1,Pak1,Parp1,Pcsk9,Pik3r1,Pip4k2a,Pip4k2b,Plcb1,Ppargc1a,Prkce,Prkcq,Pten,Ptger2,Ptgfr,Ptprj,Rab10,Rab1…		Enhancers_Heart_10907,Enhancers_Heart_10909,Enhancers_Heart_10910,Enhancers_Heart_10929,Enhancers_Heart_10930,Enhancers_Heart_10931,Enhancers_Heart_11001,Enhancers_Heart_11533,Enhancers_Heart_11534,Enhancers_Heart_11547,Enhancers_Heart_11551,Enhancers_Heart_14990,Enhancers_Heart_15046,Enhancers_Heart_15048,Enhancers_Heart_15049,Enhancers_Heart_15055,Enhancers_Heart_15056,Enhancers_Heart_15623,Enh…
GO:0071560	cellular response to transforming growth factor beta stimulus	1.65494	157	94.8677	2.49e-07	1.79225	57	31.8037	0.000139	1700037H04Rik,Adam17,Arid4a,Bambi,Bmp2,Cav2,Cdkn1c,Cdkn2b,Cilp,Dbn1,Epb41l5,Furin,Hipk2,Hsp90ab1,Htra1,Igf1r,Il17rd,Itga3,Lrp1,Ltbp1,Mef2c,Myocd,Npnt,Nr3c1,Nrep,Parp1,Pbld1,Ppara,Ppargc1a,Rasl11b,Rbbp4,Sap30,Sap30l,Serpine1,Sinhcaf,Smad2,Smad3,Smad4,Smad7,Smurf1,Snx1,Sox6,Sox9,Spry2,Src,Tgfb1,Tgfb3,Tgfbr3,Usp9x,Veph1,Wfikkn2,Wwox,Xcl1,Xcl1,Zbtb7a,Zeb2,Zfp36l1		Enhancers_Heart_10572,Enhancers_Heart_12372,Enhancers_Heart_14466,Enhancers_Heart_14919,Enhancers_Heart_16761,Enhancers_Heart_16764,Enhancers_Heart_16884,Enhancers_Heart_16885,Enhancers_Heart_18073,Enhancers_Heart_19615,Enhancers_Heart_19616,Enhancers_Heart_20863,Enhancers_Heart_21489,Enhancers_Heart_21545,Enhancers_Heart_21547,Enhancers_Heart_22111,Enhancers_Heart_22115,Enhancers_Heart_22118,Enh…
GO:0031032	actomyosin structure organization	1.67006	150	89.817	2.56e-07	1.82809	68	37.1973	1.26e-05	Actc1,Akap13,Arap1,Arhgap28,Arhgef10,Arhgef10l,Bmp10,Cavin4,Cdc42,Cnn1,Cnn3,Coro2b,Dlc1,Edn1,Epb41l2,Epb41l3,Epb41l4a,Epb41l5,Evl,Fhdc1,Fhod3,Frmd5,Frmd6,Gpr65,Inpp5k,Ldb3,Limk1,Lpar1,Mef2a,Mef2c,Mfn2,Myh6,Mylk3,Myo18a,Myom2,Myoz2,Mypn,Nrp1,Pak1,Pdlim1,Pfn2,Pgm5,Phactr1,Pik3r1,Ppm1e,Ppm1f,Prkcq,Prox1,Ptk2b,Rapgef3,Rhpn2,Rock1,S100a10,S1pr1,Sh3pxd2b,Smad3,Smad4,Sorbs1,Sorbs3,Src,Synpo,Tgfb3,Tjp1,T…		Enhancers_Heart_13529,Enhancers_Heart_13532,Enhancers_Heart_13533,Enhancers_Heart_13552,Enhancers_Heart_13557,Enhancers_Heart_15623,Enhancers_Heart_15882,Enhancers_Heart_1607,Enhancers_Heart_16438,Enhancers_Heart_20790,Enhancers_Heart_22111,Enhancers_Heart_22115,Enhancers_Heart_22118,Enhancers_Heart_22378,Enhancers_Heart_22380,Enhancers_Heart_22381,Enhancers_Heart_22920,Enhancers_Heart_24673,Enha…
GO:1901388	regulation of transforming growth factor beta activation	5.04338	21	4.16388	2.74e-07	3.84053	5	1.3019	0.0339	Furin,Hsp90ab1,Itgb6,Itgb8,Ltbp1		Enhancers_Heart_23358,Enhancers_Heart_23375,Enhancers_Heart_23376,Enhancers_Heart_23377,Enhancers_Heart_23378,Enhancers_Heart_40998,Enhancers_Heart_42208,Enhancers_Heart_42211,Enhancers_Heart_42244,Enhancers_Heart_42249,Enhancers_Heart_42263,Enhancers_Heart_42264,Enhancers_Heart_42265,Enhancers_Heart_42270,Enhancers_Heart_42275,Enhancers_Heart_42276,Enhancers_Heart_42290,Enhancers_Heart_42293,Enh…
GO:0043550	regulation of lipid kinase activity	2.47713	54	21.7994	3.09e-07	2.27477	22	9.67129	0.00177	Ambra1,App,Atg14,Cdc42,Dab2ip,Eef1a2,Fgfr3,Fgr,Flt1,Irs1,Nrbf2,Pik3r1,Pik3r3,Pik3r4,Pip4k2a,Pip4k2b,Ptk2b,Rubcn,Src,Tgfb1,Tnfaip8l3,Vav3		Enhancers_Heart_17084,Enhancers_Heart_2407,Enhancers_Heart_2411,Enhancers_Heart_2418,Enhancers_Heart_2423,Enhancers_Heart_26806,Enhancers_Heart_26841,Enhancers_Heart_26856,Enhancers_Heart_26857,Enhancers_Heart_26861,Enhancers_Heart_26886,Enhancers_Heart_26888,Enhancers_Heart_26889,Enhancers_Heart_26893,Enhancers_Heart_26897,Enhancers_Heart_26899,Enhancers_Heart_30210,Enhancers_Heart_37111,Enhance…
GO:0001816	cytokine production	1.35047	382	282.864	3.11e-07	1.21781	159	130.562	0.0336	Abcc8,Abcd2,Acod1,Acp5,Adam17,Adgrg1,Afap1l2,Akap12,Angpt1,Anxa1,App,Appl1,Aqp4,Arfgef2,Arhgef2,Atp2b1,Atp6ap2,Bank1,Batf,Bcl10,Bmpr1a,C1qtnf3,Cadm1,Card11,Ccbe1,Cd34,Cd40,Cd40lg,Ceacam10,Chuk,Cmklr1,Crhr2,Crp,Csf2,Cxcl17,Cyrib,Ddit3,Ddx1,Dhx36,Dlg1,Dll1,Enpp1,Eomes,Epha2,Erbin,Ereg,Ext1,Fgr,Flt1,Foxp1,Furin,Gadd45g,Gata4,Git1,Gprc5b,Hdac7,Hdac9,Hgf,Hif1a,Hsp90ab1,Hspb1,Ifng,Igf1,Il10,Il15,Il16,I…		Enhancers_Heart_10219,Enhancers_Heart_104,Enhancers_Heart_10907,Enhancers_Heart_10909,Enhancers_Heart_10910,Enhancers_Heart_10929,Enhancers_Heart_10930,Enhancers_Heart_10931,Enhancers_Heart_11001,Enhancers_Heart_11533,Enhancers_Heart_11534,Enhancers_Heart_11547,Enhancers_Heart_11551,Enhancers_Heart_12078,Enhancers_Heart_12354,Enhancers_Heart_12372,Enhancers_Heart_129,Enhancers_Heart_13075,Enhance…
GO:0090257	regulation of muscle system process	1.53499	204	132.9	3.25e-07	1.87017	80	42.7768	6.03e-07	Abcc8,Actn3,Ada,Adra1a,Adrb1,Akap1,Akap6,Anxa6,Atp1a1,Atp1b1,Atp2b1,Bmp10,Cacna1c,Cacna2d1,Calm1,Calm2,Camk2d,Chrm2,Ctnna3,Cttn,Dbn1,Dlg1,Dock4,Dock5,Edn1,Edn2,Ehd3,Fbxo32,Flt1,Foxo1,Foxp1,Gata4,Gja5,Gucy1a1,Hand2,Hcn4,Hdac4,Igf1,Igfbp5,Jarid2,Jup,Kcnj2,Kcnma1,Kcnq1,Map2k1,Mef2a,Mef2c,Mlip,Myocd,Nol3,Npnt,Nppa,Nr3c1,Nr4a3,Pak1,Parp1,Pde4b,Pde5a,Pde9a,Pln,Ppara,Ppp3ca,Prkg1,Ptgs2,Rgs2,Rock1,Scn4a,…		Enhancers_Heart_10907,Enhancers_Heart_10909,Enhancers_Heart_10910,Enhancers_Heart_10929,Enhancers_Heart_10930,Enhancers_Heart_10931,Enhancers_Heart_11533,Enhancers_Heart_11534,Enhancers_Heart_11547,Enhancers_Heart_11551,Enhancers_Heart_14365,Enhancers_Heart_14919,Enhancers_Heart_16620,Enhancers_Heart_17274,Enhancers_Heart_17672,Enhancers_Heart_18039,Enhancers_Heart_18045,Enhancers_Heart_18046,Enh…
GO:0009894	regulation of catabolic process	1.30726	462	353.41	3.62e-07	1.27281	214	168.132	0.0014	A1cf,Abcd2,Abhd5,Acer2,Actn3,Adgrb1,Adra1a,Agbl4,Agtpbp1,Aifm1,Alk,Alkbh5,Ambra1,Anks1,App,Aqp11,Arntl,Asb11,Atf6,Atg101,Atg14,Atg16l1,Atg7,Atp6v0a1,Bcap31,Bcl2l11,Bid,Bnip3,Boll,Btrc,C4bp,C9orf72,Ccar2,Cdc20b,Chmp4b,Clec16a,Cop1,Cttn,Dab2ip,Dact1,Dap,Dapk1,Dapl1,Dazl,Ddit3,Dhx36,Disc1,Dram1,E2f1,Enpp7,Epha4,Epm2a,Ercc4,Esrrb,Fam122a,Fastkd2,Fbxo7,Fbxw7,Fbxw8,Fez1,Fez2,Fmc1,Foxk1,Foxo1,Furin,Gaba…		Enhancers_Heart_10572,Enhancers_Heart_10829,Enhancers_Heart_10833,Enhancers_Heart_10864,Enhancers_Heart_10865,Enhancers_Heart_10907,Enhancers_Heart_10909,Enhancers_Heart_10910,Enhancers_Heart_10929,Enhancers_Heart_10930,Enhancers_Heart_10931,Enhancers_Heart_10948,Enhancers_Heart_10949,Enhancers_Heart_11640,Enhancers_Heart_11641,Enhancers_Heart_12078,Enhancers_Heart_12354,Enhancers_Heart_12372,Enh…
GO:0014912	negative regulation of smooth muscle cell migration	2.27691	62	27.2299	4.86e-07	2.24031	15	6.69551	0.0153	Abhd2,Bmpr1a,Gna12,Igfbp5,Lrp1,Mef2c,Myocd,Ndrg4,Nfe2l2,Ppargc1a,Prkg1,Serpine1,Tafa5,Tpm1,Trib1		Enhancers_Heart_12372,Enhancers_Heart_14919,Enhancers_Heart_1967,Enhancers_Heart_26195,Enhancers_Heart_26212,Enhancers_Heart_26213,Enhancers_Heart_26227,Enhancers_Heart_26239,Enhancers_Heart_26247,Enhancers_Heart_26248,Enhancers_Heart_29061,Enhancers_Heart_29065,Enhancers_Heart_29084,Enhancers_Heart_33520,Enhancers_Heart_33524,Enhancers_Heart_34978,Enhancers_Heart_34988,Enhancers_Heart_48757,Enha…
GO:0060048	cardiac muscle contraction	1.87116	100	53.4429	5.15e-07	1.93145	37	19.1566	0.000811	Actc1,Adra1a,Adrb1,Akap6,Atp1a1,Atp1b1,Bmp10,Cacna1c,Calm1,Calm2,Camk2d,Ctnna3,Dlg1,Ehd3,Gata4,Gja5,Hcn4,Hdac4,Jup,Kcnj2,Kcnq1,Map2k6,Myh6,Nppa,Pde4b,Pde5a,Pln,Rgs2,Slc8a1,Slc9a1,Smad5,Smad7,Stc1,Tmem38b,Tpm1,Ttn,Zc3h12a		Enhancers_Heart_17274,Enhancers_Heart_18011,Enhancers_Heart_18014,Enhancers_Heart_18015,Enhancers_Heart_18039,Enhancers_Heart_18045,Enhancers_Heart_18046,Enhancers_Heart_18049,Enhancers_Heart_18057,Enhancers_Heart_18058,Enhancers_Heart_20479,Enhancers_Heart_22502,Enhancers_Heart_22546,Enhancers_Heart_22551,Enhancers_Heart_22561,Enhancers_Heart_22569,Enhancers_Heart_25557,Enhancers_Heart_29581,Enh…
GO:0016051	carbohydrate biosynthetic process	1.65975	145	87.3623	6.55e-07	1.69792	60	35.3374	0.000413	Akr1a1,Akr1b3,Arpp19,Atf3,Avpr1b,B3galnt1,B3galt1,B3galt2,B3gat2,B3gnt2,B3gnt7,B4galt1,B4galt5,C1qtnf3,Chst9,Cry1,Csgalnact1,Dyrk2,Enpp1,Epm2a,Esrrb,Ext1,Ext2,Fbp2,Foxo1,Gbe1,Gfpt1,Gpi1,Gyg,Has2,Hif1a,Hs2st1,Igf1,Igf2,Inpp5k,Irs1,Kat2b,Lep,Mpdu1,Ndst1,Nln,Nr3c1,P2ry1,Pdk2,Pou1f1,Ppara,Ppargc1a,Ppp1cb,Ppp1r3a,Ppp1r3b,Ptk2b,Sds,Sik1,Slc39a14,Smpd3,Soga1,Sorbs1,St3gal4,St6galnac5,Tgfb1		Enhancers_Heart_10907,Enhancers_Heart_10909,Enhancers_Heart_10910,Enhancers_Heart_10929,Enhancers_Heart_10930,Enhancers_Heart_10931,Enhancers_Heart_12078,Enhancers_Heart_12093,Enhancers_Heart_13168,Enhancers_Heart_15211,Enhancers_Heart_15623,Enhancers_Heart_16882,Enhancers_Heart_16884,Enhancers_Heart_16885,Enhancers_Heart_21078,Enhancers_Heart_21108,Enhancers_Heart_21114,Enhancers_Heart_21123,Enh…
GO:0030278	regulation of ossification	1.66588	141	84.6398	7.52e-07	1.98322	45	22.6903	8.21e-05	Actn3,Acvr1,Adgrv1,Ank,Ano6,Atp2b1,Bcor,Bglap2,Bmp2,Bmp4,Bmpr1a,Bmpr1b,Ddr2,Dhrs3,Dkk1,Enpp1,Fam20c,Fgfr3,Gja6,Hif1a,Lrp6,Mapk1,Matn1,Mef2c,Mgp,Mkx,Nipbl,P2ry2,Pbx1,Pkdcc,Ptk2b,Ptn,Runx2,S1pr1,Scube2,Slc8a1,Smad3,Smad7,Smurf1,Sox9,Tent5a,Tgfb1,Thrb,Wnt5a,Zbtb16		Enhancers_Heart_11533,Enhancers_Heart_11534,Enhancers_Heart_11547,Enhancers_Heart_11551,Enhancers_Heart_18073,Enhancers_Heart_21078,Enhancers_Heart_21108,Enhancers_Heart_21114,Enhancers_Heart_21123,Enhancers_Heart_21125,Enhancers_Heart_21141,Enhancers_Heart_26153,Enhancers_Heart_26154,Enhancers_Heart_26155,Enhancers_Heart_26156,Enhancers_Heart_26161,Enhancers_Heart_26176,Enhancers_Heart_26195,Enh…
GO:0071559	response to transforming growth factor beta	1.60915	159	98.8098	7.87e-07	1.78201	58	32.5476	0.000139	1700037H04Rik,Adam17,Arid4a,Bambi,Bmp2,Cav2,Cdkn1c,Cdkn2b,Cilp,Dbn1,Epb41l5,Furin,Hipk2,Hsp90ab1,Htra1,Igf1r,Il17rd,Itga3,Lrp1,Ltbp1,Mef2c,Myocd,Npnt,Nr3c1,Nrep,Parp1,Pbld1,Ppara,Ppargc1a,Rasl11b,Rbbp4,Rock1,Sap30,Sap30l,Serpine1,Sinhcaf,Smad2,Smad3,Smad4,Smad7,Smurf1,Snx1,Sox6,Sox9,Spry2,Src,Tgfb1,Tgfb3,Tgfbr3,Usp9x,Veph1,Wfikkn2,Wwox,Xcl1,Xcl1,Zbtb7a,Zeb2,Zfp36l1		Enhancers_Heart_10572,Enhancers_Heart_12372,Enhancers_Heart_14466,Enhancers_Heart_14919,Enhancers_Heart_16761,Enhancers_Heart_16764,Enhancers_Heart_16884,Enhancers_Heart_16885,Enhancers_Heart_18073,Enhancers_Heart_19615,Enhancers_Heart_19616,Enhancers_Heart_20863,Enhancers_Heart_21489,Enhancers_Heart_21545,Enhancers_Heart_21547,Enhancers_Heart_22111,Enhancers_Heart_22115,Enhancers_Heart_22118,Enh…
GO:0030048	actin filament-based movement	1.90074	93	48.9282	8.18e-07	2.24031	40	17.8547	1.25e-05	Acta2,Actc1,Actn4,Adrb1,Akap6,Atp1a1,Cacna1c,Camk2d,Ccdc88c,Ctnna3,Dbn1,Dlg1,Epb41l5,Evl,Fnbp1l,Frmd6,Gata4,Gja5,Jup,Kcnj2,Myh2,Myh6,Myo1b,Myo1c,Myo1e,Myo5a,Myo5c,Pard3,Parva,Pde4b,Pik3ca,Pln,Rock1,Stc1,Sun2,Syne2,Tpm1,Wasf2,Wipf2,Wipf3		Enhancers_Heart_1078,Enhancers_Heart_1087,Enhancers_Heart_14997,Enhancers_Heart_15623,Enhancers_Heart_17185,Enhancers_Heart_17274,Enhancers_Heart_18039,Enhancers_Heart_18045,Enhancers_Heart_18046,Enhancers_Heart_18049,Enhancers_Heart_18057,Enhancers_Heart_18058,Enhancers_Heart_20479,Enhancers_Heart_20790,Enhancers_Heart_21238,Enhancers_Heart_21248,Enhancers_Heart_21249,Enhancers_Heart_22615,Enhan…
GO:0046854	phosphatidylinositol phosphate biosynthetic process	2.37453	55	23.1624	8.18e-07	2.16956	23	10.6012	0.00263	Atg14,Cish,Efr3b,Inpp1,Ip6k2,Itpkc,Pik3c2a,Pik3c2b,Pik3c2g,Pik3c3,Pik3ca,Pik3cb,Pik3cg,Pik3r1,Pik3r3,Pik3r4,Pip4k2a,Pip4k2b,Pip5k1b,Socs1,Socs5,Ttc7,Ttc7b		Enhancers_Heart_1171,Enhancers_Heart_17084,Enhancers_Heart_18979,Enhancers_Heart_19874,Enhancers_Heart_19882,Enhancers_Heart_19889,Enhancers_Heart_22502,Enhancers_Heart_22546,Enhancers_Heart_22551,Enhancers_Heart_22561,Enhancers_Heart_22569,Enhancers_Heart_26806,Enhancers_Heart_26841,Enhancers_Heart_26856,Enhancers_Heart_26857,Enhancers_Heart_26861,Enhancers_Heart_26886,Enhancers_Heart_26888,Enha…
GO:0043547	positive regulation of GTPase activity	1.54639	185	119.634	9.2e-07	1.87967	86	45.7526	1.49e-07	Abr,Adrb1,Afdn,Arap1,Arap2,Arap3,Arhgap24,Arhgap25,Arhgap29,Arhgap35,Arhgef10,Arhgef26,Asap1,Asap2,Bcar3,Bcas3,Bcr,C9orf72,Cav2,Ccl12,Ccl17,Cd40,Cdkl5,Chn2,Dennd1a,Dock9,Dvl3,Epha2,Erbb2,Gm49510,Gnao1,Gnas,Gpr65,Itga6,Map2k1,Map4k4,Mapre2,Mex3b,Mtss2,Net1,Ntf3,Ntrk1,Pkp4,Plxnb1,Ptk2b,Rabgap1l,Ralgapa2,Ralgps1,Ralgps2,Rap1a,Rapgef1,Rapgef2,Rapgef3,Rapgefl1,Rasgef1b,Rasgrf1,Rasgrf2,Rasgrp3,Rgma,Rgs…		Enhancers_Heart_10078,Enhancers_Heart_12586,Enhancers_Heart_15425,Enhancers_Heart_15430,Enhancers_Heart_15729,Enhancers_Heart_15730,Enhancers_Heart_1607,Enhancers_Heart_16176,Enhancers_Heart_16324,Enhancers_Heart_17154,Enhancers_Heart_17185,Enhancers_Heart_18715,Enhancers_Heart_18717,Enhancers_Heart_19608,Enhancers_Heart_19978,Enhancers_Heart_19980,Enhancers_Heart_19984,Enhancers_Heart_19985,Enha…
GO:0016202	regulation of striated muscle tissue development	2.96971	36	12.1224	1.16e-06	2.93277	12	4.0917	0.00374	Bmp4,Cdon,Fgf3,Gja6,Hdac7,Hdac9,Jph2,Lef1,Mrtfb,Smad3,Sox15,Tgfb1		Enhancers_Heart_15211,Enhancers_Heart_19978,Enhancers_Heart_19980,Enhancers_Heart_19984,Enhancers_Heart_19985,Enhancers_Heart_19996,Enhancers_Heart_19997,Enhancers_Heart_20007,Enhancers_Heart_20013,Enhancers_Heart_20015,Enhancers_Heart_20023,Enhancers_Heart_20048,Enhancers_Heart_29220,Enhancers_Heart_29243,Enhancers_Heart_29252,Enhancers_Heart_33738,Enhancers_Heart_36133,Enhancers_Heart_36185,Enh…
GO:0009725	response to hormone	1.36613	320	234.239	1.73e-06	1.35503	125	92.2492	0.00298	Abhd2,Acaca,Acod1,Adcy6,Adcy8,Adra1a,Anxa1,Aqp1,Ar,Areg,Arsb,Atp1a1,Atp2b1,Bbs2,Bcas3,Bglap2,Bmp4,Ceacam10,Chuk,Crhr2,Crls1,Cry1,Cry2,Ctnnb1,Cyp11a1,Edn1,Ednrb,Efna5,Enpp1,Eprs,Esr1,Fas,Fbxo32,Foxo1,Gata4,Gdnf,Glp2r,Gnas,Gnrh1,Grb14,Hcls1,Hdac8,Hdac9,Igf1,Igf1r,Igf2,Ikbkb,Il10,Il17a,Inpp5k,Irs1,Kat2b,Kcnma1,Kcnq1,Klf9,Lcat,Lep,Lpin1,Lpl,Map2k1,Mapk1,Mbp,Me1,Mef2c,Mfn2,Mme,Mmp14,Myo1c,Myo5a,Nck1,N…		Enhancers_Heart_10829,Enhancers_Heart_10833,Enhancers_Heart_10864,Enhancers_Heart_10865,Enhancers_Heart_10907,Enhancers_Heart_10909,Enhancers_Heart_10910,Enhancers_Heart_10929,Enhancers_Heart_10930,Enhancers_Heart_10931,Enhancers_Heart_11001,Enhancers_Heart_11533,Enhancers_Heart_11534,Enhancers_Heart_11547,Enhancers_Heart_11551,Enhancers_Heart_14990,Enhancers_Heart_15046,Enhancers_Heart_15048,Enh…
GO:0048771	tissue remodeling	1.63456	141	86.2619	2.1e-06	1.69449	52	30.6877	0.0013	Abr,Ahr,Bcr,Cartpt,Ceacam10,Chd7,Cyp19a1,Ddr2,Enpp1,Epas1,Epha2,Ext1,Fgfr3,Gata4,Gja5,Gja6,Hand2,Hif1a,Hrg,Igf1,Igfbp5,Inpp4b,Inpp5d,Jag1,Klf6,Lep,Lif,Lrp1,Lrp6,Mef2c,Mitf,Mmp14,Mmp9,Nfatc3,Nol3,Notch2,Pbrm1,Ppargc1b,Ppp3ca,Rassf2,Rock1,S1pr1,Spp2,Src,Suco,Syk,Tgfb2,Tgfbr3,Tnfrsf11b,Tnfsf11,Ubash3b,Vegfa		Enhancers_Heart_10078,Enhancers_Heart_10907,Enhancers_Heart_10909,Enhancers_Heart_10910,Enhancers_Heart_10929,Enhancers_Heart_10930,Enhancers_Heart_10931,Enhancers_Heart_12372,Enhancers_Heart_12593,Enhancers_Heart_12615,Enhancers_Heart_15729,Enhancers_Heart_15730,Enhancers_Heart_1967,Enhancers_Heart_20060,Enhancers_Heart_20064,Enhancers_Heart_20085,Enhancers_Heart_21078,Enhancers_Heart_21108,Enha…
GO:0019216	regulation of lipid metabolic process	1.46275	221	151.086	2.31e-06	1.35511	93	68.6289	0.0127	Abcd2,Abhd5,Abhd6,Acsl4,Alk,Ambra1,Anxa1,App,Asxl3,Atg14,Atg7,Atp1a1,Bmp2,Cdc42,Ceacam10,Dab2ip,Ddx20,Dhh,Disp3,Dkk3,Dnajc15,Eef1a2,Enpp7,Erbb4,Erlin2,Esr1,Fabp5,Fgf1,Fgfr3,Fgr,Flt1,Fmc1,Foxa2,Gal,H6pd,Ifng,Igf1,Igf1r,Igf2,Igfbp7,Irs1,Isx,Kcnma1,Lep,Lmf1,Lonp2,Macroh2a1,Mid1ip1,Mtmr2,Mtmr3,Nfe2l1,Nr1d2,Nr1h3,Nr1h4,Nr3c1,Nr4a3,Pank2,Pdgfa,Pdk2,Pik3cg,Pik3r4,Pip4k2a,Pip4k2b,Pla2g4a,Por,Ppara,Ppargc…		Enhancers_Heart_10907,Enhancers_Heart_10909,Enhancers_Heart_10910,Enhancers_Heart_10929,Enhancers_Heart_10930,Enhancers_Heart_10931,Enhancers_Heart_11001,Enhancers_Heart_12078,Enhancers_Heart_12405,Enhancers_Heart_12622,Enhancers_Heart_12623,Enhancers_Heart_14640,Enhancers_Heart_14641,Enhancers_Heart_14643,Enhancers_Heart_14655,Enhancers_Heart_16882,Enhancers_Heart_16884,Enhancers_Heart_16885,Enh…
GO:0055117	regulation of cardiac muscle contraction	1.93035	83	42.9975	2.62e-06	2.52035	30	11.9031	1.87e-05	Adra1a,Adrb1,Akap6,Atp1a1,Atp1b1,Bmp10,Cacna1c,Calm1,Calm2,Ctnna3,Dlg1,Ehd3,Gata4,Gja5,Hcn4,Hdac4,Jup,Kcnj2,Kcnq1,Nppa,Pde4b,Pde5a,Pln,Rgs2,Slc8a1,Slc9a1,Smad7,Stc1,Tmem38b,Zc3h12a		Enhancers_Heart_17274,Enhancers_Heart_18039,Enhancers_Heart_18045,Enhancers_Heart_18046,Enhancers_Heart_18049,Enhancers_Heart_18057,Enhancers_Heart_18058,Enhancers_Heart_20479,Enhancers_Heart_22502,Enhancers_Heart_22546,Enhancers_Heart_22551,Enhancers_Heart_22561,Enhancers_Heart_22569,Enhancers_Heart_29948,Enhancers_Heart_29958,Enhancers_Heart_30228,Enhancers_Heart_30232,Enhancers_Heart_30235,Enh…
GO:1990845	adaptive thermogenesis	1.66423	129	77.5132	2.7e-06	1.46638	42	28.6419	0.0453	Abhd6,Acot11,Actn3,Adam17,Adipor2,Adrb1,Arntl,Arrdc3,Clic5,Cmklr1,Ddit3,Dhrs7b,Dync1h1,Ebf2,Epas1,Esrrg,Fabp5,Gadd45g,Gja6,Gnas,Gpr3,Igf1r,Il15,Irf4,Lep,Lpin1,Map2k6,Mfn2,Nr1h3,Pctp,Pemt,Plcl1,Plcl2,Pm20d1,Ppargc1a,Ppargc1b,Pwwp2b,Rheb,Sorl1,Syk,Vegfa,Ybx2		Enhancers_Heart_12354,Enhancers_Heart_1319,Enhancers_Heart_1324,Enhancers_Heart_1327,Enhancers_Heart_14618,Enhancers_Heart_14686,Enhancers_Heart_15232,Enhancers_Heart_16660,Enhancers_Heart_16661,Enhancers_Heart_16668,Enhancers_Heart_18011,Enhancers_Heart_18014,Enhancers_Heart_18015,Enhancers_Heart_19404,Enhancers_Heart_19406,Enhancers_Heart_19432,Enhancers_Heart_19434,Enhancers_Heart_19438,Enhanc…
GO:0006942	regulation of striated muscle contraction	1.89855	85	44.7711	3.13e-06	2.20584	32	14.5069	0.000164	Actn3,Adra1a,Adrb1,Akap6,Atp1a1,Atp1b1,Bmp10,Cacna1c,Calm1,Calm2,Ctnna3,Dlg1,Ehd3,Gata4,Gja5,Hcn4,Hdac4,Jup,Kcnj2,Kcnq1,Nppa,Pde4b,Pde5a,Pln,Rgs2,Scn4a,Slc8a1,Slc9a1,Smad7,Stc1,Tmem38b,Zc3h12a		Enhancers_Heart_17274,Enhancers_Heart_17672,Enhancers_Heart_18039,Enhancers_Heart_18045,Enhancers_Heart_18046,Enhancers_Heart_18049,Enhancers_Heart_18057,Enhancers_Heart_18058,Enhancers_Heart_20479,Enhancers_Heart_22502,Enhancers_Heart_22546,Enhancers_Heart_22551,Enhancers_Heart_22561,Enhancers_Heart_22569,Enhancers_Heart_29948,Enhancers_Heart_29958,Enhancers_Heart_30228,Enhancers_Heart_30232,Enh…
GO:1900825	regulation of membrane depolarization during cardiac muscle cell action potential	5.90381	15	2.54073	3.95e-06	4.30139	4	0.929931	0.0453	Ank3,Gja5,Rangrf,Slmap		Enhancers_Heart_15169,Enhancers_Heart_28584,Enhancers_Heart_60874,Enhancers_Heart_60881,Enhancers_Heart_60885,Enhancers_Heart_9862,Enhancers_Heart_9876,Enhancers_Heart_9879,Enhancers_Heart_9883,Enhancers_Heart_9889,Enhancers_Heart_9901,Enhancers_Heart_9903,Enhancers_Heart_9935,Enhancers_Heart_9945,Enhancers_Heart_9946
GO:0070252	actin-mediated cell contraction	1.98083	74	37.358	4.36e-06	2.26831	27	11.9031	0.000413	Acta2,Actc1,Adrb1,Akap6,Atp1a1,Cacna1c,Camk2d,Ccdc88c,Ctnna3,Dbn1,Dlg1,Epb41l5,Frmd6,Gata4,Gja5,Jup,Kcnj2,Myh2,Myh6,Pard3,Parva,Pde4b,Pik3ca,Pln,Rock1,Stc1,Tpm1		Enhancers_Heart_14997,Enhancers_Heart_17274,Enhancers_Heart_18039,Enhancers_Heart_18045,Enhancers_Heart_18046,Enhancers_Heart_18049,Enhancers_Heart_18057,Enhancers_Heart_18058,Enhancers_Heart_20479,Enhancers_Heart_20790,Enhancers_Heart_22615,Enhancers_Heart_22629,Enhancers_Heart_25475,Enhancers_Heart_29581,Enhancers_Heart_29948,Enhancers_Heart_29958,Enhancers_Heart_30408,Enhancers_Heart_3548,Enha…
GO:0051216	cartilage development	1.57915	151	95.621	4.87e-06	2.02104	53	26.2241	8.56e-06	Adamts7,Bbs1,Bbs2,Bmp1,Bmp10,Bmp2,Bmp4,Bmpr1a,Bmpr1b,Chadl,Creb3l2,Csgalnact1,Ctnnb1,Dlx2,Edn1,Enpp1,Ext1,Fgfr3,Frzb,Gli2,Gli3,Gnas,Hif1a,Itgb8,Lep,Loxl2,Maf,Mgp,Mkx,Pax7,Pitx1,Pkdcc,Por,Pthlh,Rarb,Runx2,Shox2,Smad3,Smad5,Smad7,Smpd3,Sox6,Sox9,Sulf1,Tapt1,Tgfb1,Tgfb2,Tgfbr2,Thrb,Trps1,Wnt5a,Zbtb16,Zbtb7a		Enhancers_Heart_104,Enhancers_Heart_10572,Enhancers_Heart_129,Enhancers_Heart_18073,Enhancers_Heart_21078,Enhancers_Heart_21108,Enhancers_Heart_21114,Enhancers_Heart_21123,Enhancers_Heart_21125,Enhancers_Heart_21141,Enhancers_Heart_23358,Enhancers_Heart_23375,Enhancers_Heart_23376,Enhancers_Heart_23377,Enhancers_Heart_23378,Enhancers_Heart_23765,Enhancers_Heart_24673,Enhancers_Heart_25489,Enhance…
GO:0070997	neuron death	1.37313	288	209.74	4.87e-06	1.34736	106	78.6722	0.0085	Abcc1,Adora2a,Aifm1,Ambra1,Angpt1,Ap2b1,App,Atg7,Bag1,Bcl2l11,Bnip3,Casp7,Ccl12,Cd34,Cdc42,Chmp4b,Clcf1,Cln8,Cpeb4,Ctnnb1,Dcc,Ddit3,Ddr2,Dkk1,Dnajc5,Dtnbp1,Egln3,Enpp1,Epha7,Ephb1,Esr1,Fas,Fbxo7,Fbxw7,Fgfr3,Fos,Gabrb3,Gdnf,Gpi1,Gpr75,Hdac4,Hif1a,Hipk2,Hsp90ab1,Ifng,Igf1,Ikbkb,Il10,Inpp5a,Itpr1,Jun,Kcnma1,Lrp1,Mapt,Mecp2,Mef2c,Mfn2,Musk,Mybl2,Ncoa7,Ndnf,Ndufs4,Ngf,Nos1ap,Npm1,Npy,Nr3c1,Nr4a3,Nrp1,…		Enhancers_Heart_10108,Enhancers_Heart_10829,Enhancers_Heart_10833,Enhancers_Heart_10907,Enhancers_Heart_10909,Enhancers_Heart_10910,Enhancers_Heart_10929,Enhancers_Heart_10930,Enhancers_Heart_10931,Enhancers_Heart_12078,Enhancers_Heart_12354,Enhancers_Heart_12372,Enhancers_Heart_13387,Enhancers_Heart_13490,Enhancers_Heart_13495,Enhancers_Heart_13511,Enhancers_Heart_16176,Enhancers_Heart_16194,Enh…
GO:2001212	regulation of vasculogenesis	3.2723	28	8.55666	4.87e-06	3.22604	9	2.78979	0.00788	Cd34,Ceacam10,Hey1,Rap1a,Rapgef2,Rin2,Rtn4,Tmem100,Xdh		Enhancers_Heart_13255,Enhancers_Heart_13265,Enhancers_Heart_16690,Enhancers_Heart_42152,Enhancers_Heart_42158,Enhancers_Heart_42159,Enhancers_Heart_42160,Enhancers_Heart_42161,Enhancers_Heart_42163,Enhancers_Heart_42190,Enhancers_Heart_56039,Enhancers_Heart_56088,Enhancers_Heart_58141,Enhancers_Heart_58146,Enhancers_Heart_58147,Enhancers_Heart_58153,Enhancers_Heart_59961,Enhancers_Heart_61396,Enh…
GO:0006661	phosphatidylinositol biosynthetic process	1.96133	74	37.7295	5.27e-06	1.72265	33	19.1566	0.0111	Atg14,Cdipt,Cds1,Cish,Dpm1,Efr3b,Inpp1,Ip6k2,Itpkc,Pdgfa,Pgap1,Piga,Pigc,Pigh,Pigu,Pik3c2a,Pik3c2b,Pik3c2g,Pik3c3,Pik3ca,Pik3cb,Pik3cg,Pik3r1,Pik3r3,Pik3r4,Pip4k2a,Pip4k2b,Pip5k1b,Socs1,Socs5,Ttc7,Ttc7b,Vac14		Enhancers_Heart_1171,Enhancers_Heart_1249,Enhancers_Heart_1274,Enhancers_Heart_17084,Enhancers_Heart_18979,Enhancers_Heart_19874,Enhancers_Heart_19882,Enhancers_Heart_19889,Enhancers_Heart_21442,Enhancers_Heart_21443,Enhancers_Heart_22502,Enhancers_Heart_22546,Enhancers_Heart_22551,Enhancers_Heart_22561,Enhancers_Heart_22569,Enhancers_Heart_26806,Enhancers_Heart_26841,Enhancers_Heart_26856,Enhanc…
GO:0048662	negative regulation of smooth muscle cell proliferation	1.88513	83	44.0288	5.4e-06	1.73953	22	12.6471	0.0422	Bmp2,Cdkn1a,Cnn1,Esr1,Gna12,Ifng,Igfbp5,Il10,Il15,Mef2c,Mfn2,Myocd,Ndrg4,Pik3r1,Ppargc1a,Prkg1,Pten,Sf1,Tafa5,Tgfb3,Tpm1,Trib1		Enhancers_Heart_12078,Enhancers_Heart_14919,Enhancers_Heart_1967,Enhancers_Heart_22111,Enhancers_Heart_22115,Enhancers_Heart_22118,Enhancers_Heart_26195,Enhancers_Heart_26212,Enhancers_Heart_26213,Enhancers_Heart_26227,Enhancers_Heart_26239,Enhancers_Heart_26247,Enhancers_Heart_26248,Enhancers_Heart_26806,Enhancers_Heart_26841,Enhancers_Heart_26856,Enhancers_Heart_26857,Enhancers_Heart_26861,Enha…
GO:2001014	regulation of skeletal muscle cell differentiation	2.37736	48	20.1905	5.58e-06	2.81639	11	3.90571	0.0085	Arntl,Ephb1,Hdac4,Hdac9,Mef2c,Myocd,Nln,Nr1d2,Rbfox1,S100b,Uqcc2		Enhancers_Heart_10219,Enhancers_Heart_14919,Enhancers_Heart_19978,Enhancers_Heart_19980,Enhancers_Heart_19984,Enhancers_Heart_19985,Enhancers_Heart_19996,Enhancers_Heart_19997,Enhancers_Heart_20007,Enhancers_Heart_20013,Enhancers_Heart_20015,Enhancers_Heart_20023,Enhancers_Heart_20048,Enhancers_Heart_26195,Enhancers_Heart_26212,Enhancers_Heart_26213,Enhancers_Heart_26227,Enhancers_Heart_26239,Enh…
GO:0010632	regulation of epithelial cell migration	1.43813	226	157.148	5.66e-06	1.98896	91	45.7526	3.49e-09	Adam17,Adamts9,Adgrb1,Amot,Amotl1,Angpt1,Anxa1,Aqp1,Arf6,Arhgap5,Arsb,Bcas3,Bmp10,Bmp4,Bmper,Capn7,Ccbe1,Cd40,Ceacam10,Cib1,Ctsh,Dab2ip,Dock5,Dusp10,Epb41l5,Epha2,Ets1,Evl,Fbxw7,Fgf1,Foxp1,Glul,Gm49510,Gpi1,Has2,Hdac7,Hdac9,Hif1a,Hrg,Hspb1,Ifng,Igf1,Igf2,Irs1,Itga3,Jcad,Jun,Jup,Macir,Map4k4,Mapre2,Mecp2,Mef2c,Meox2,Mmp9,Nfe2l2,Nr2f2,Nrp1,Pfn2,Pik3c2a,Pik3cb,Pik3cg,Plk2,Ppm1f,Prkce,Prkd1,Prox1,Pte…		Enhancers_Heart_10907,Enhancers_Heart_10909,Enhancers_Heart_10910,Enhancers_Heart_10929,Enhancers_Heart_10930,Enhancers_Heart_10931,Enhancers_Heart_11906,Enhancers_Heart_11910,Enhancers_Heart_12078,Enhancers_Heart_13255,Enhancers_Heart_13265,Enhancers_Heart_16324,Enhancers_Heart_16884,Enhancers_Heart_16885,Enhancers_Heart_17274,Enhancers_Heart_18073,Enhancers_Heart_19615,Enhancers_Heart_19616,Enh…
GO:0010638	positive regulation of organelle organization	1.37037	284	207.244	6.98e-06	1.29208	124	95.9689	0.0143	Actr5,Ambra1,Ank1,Anxa1,Arf6,Arhgap35,Arhgef10,Arhgef10l,Asap1,Bcas3,Bcl2l11,Bid,Bmp10,Bnip3,Cdc42,Cdc42ep3,Cdk5rap2,Clec16a,Csf2,Ctnnb1,Cttn,Dazl,Ddhd1,Dhx36,Dlg1,Dmrt1,Dstn,Dync1h1,Edn1,Ereg,Evl,Fas,Fbxo7,Fchsd1,Fchsd2,Fscn1,Gda,Git1,Gm42878,Gpr65,Hif1a,Hmbox1,Hmbox1,Hnrnpd,Igf1,Igf1r,Igf2,Ino80d,Katnb1,Limk1,Lman1,Lpar1,Macroh2a1,Map1b,Map3k4,Mapk1,Mapt,Mecp2,Mmp9,Morc2b,Mul1,Mylk3,Myo1c,Ncapg…		Enhancers_Heart_10829,Enhancers_Heart_10833,Enhancers_Heart_10907,Enhancers_Heart_10909,Enhancers_Heart_10910,Enhancers_Heart_10929,Enhancers_Heart_10930,Enhancers_Heart_10931,Enhancers_Heart_12546,Enhancers_Heart_13529,Enhancers_Heart_13532,Enhancers_Heart_13533,Enhancers_Heart_13552,Enhancers_Heart_13557,Enhancers_Heart_14294,Enhancers_Heart_15623,Enhancers_Heart_15851,Enhancers_Heart_1607,Enha…
GO:0031329	regulation of cellular catabolic process	1.31043	372	283.877	6.98e-06	1.34054	184	137.258	0.000292	A1cf,Abcd2,Abhd5,Acer2,Adra1a,Agbl4,Agtpbp1,Aifm1,Alkbh5,Ambra1,Anks1,App,Aqp11,Atf6,Atg101,Atg14,Atg16l1,Atg7,Atp6v0a1,Bcap31,Bcl2l11,Bid,Bnip3,Boll,Btrc,C9orf72,Ccar2,Cdc20b,Chmp4b,Clec16a,Cop1,Cttn,Dab2ip,Dap,Dapk1,Dapl1,Dazl,Ddit3,Dhx36,Disc1,Dram1,E2f1,Enpp7,Epha4,Epm2a,Ercc4,Esrrb,Fam122a,Fastkd2,Fbxo7,Fbxw7,Fbxw8,Fez1,Fez2,Foxk1,Foxo1,Furin,Gabarapl2,Gata4,Gdnf,Git1,Gna12,Gnai3,Gtpbp1,Herc…		Enhancers_Heart_10829,Enhancers_Heart_10833,Enhancers_Heart_10864,Enhancers_Heart_10865,Enhancers_Heart_10907,Enhancers_Heart_10909,Enhancers_Heart_10910,Enhancers_Heart_10929,Enhancers_Heart_10930,Enhancers_Heart_10931,Enhancers_Heart_10948,Enhancers_Heart_10949,Enhancers_Heart_11640,Enhancers_Heart_11641,Enhancers_Heart_12078,Enhancers_Heart_12354,Enhancers_Heart_12372,Enhancers_Heart_12622,Enh…
GO:1901214	regulation of neuron death	1.39023	262	188.458	7.74e-06	1.36192	96	70.4888	0.00983	Abcc1,Adora2a,Aifm1,Ambra1,Angpt1,Ap2b1,App,Atg7,Bag1,Bcl2l11,Ccl12,Cd34,Cdc42,Chmp4b,Clcf1,Cln8,Cpeb4,Ctnnb1,Dcc,Ddit3,Ddr2,Dkk1,Dnajc5,Dtnbp1,Egln3,Epha7,Ephb1,Esr1,Fas,Fbxo7,Fbxw7,Fgfr3,Fos,Gabrb3,Gdnf,Gpi1,Gpr75,Hdac4,Hif1a,Hipk2,Hsp90ab1,Ifng,Igf1,Ikbkb,Il10,Inpp5a,Itpr1,Jun,Kcnma1,Lrp1,Mapt,Mecp2,Mef2c,Mfn2,Musk,Mybl2,Ncoa7,Ndnf,Ngf,Nos1ap,Npm1,Npy,Nr3c1,Nr4a3,Nrp1,Ntf3,Ntrk1,Ntrk2,Oxr1,Par…		Enhancers_Heart_10108,Enhancers_Heart_10829,Enhancers_Heart_10833,Enhancers_Heart_10907,Enhancers_Heart_10909,Enhancers_Heart_10910,Enhancers_Heart_10929,Enhancers_Heart_10930,Enhancers_Heart_10931,Enhancers_Heart_12078,Enhancers_Heart_12354,Enhancers_Heart_12372,Enhancers_Heart_13387,Enhancers_Heart_13490,Enhancers_Heart_13495,Enhancers_Heart_13511,Enhancers_Heart_16176,Enhancers_Heart_16194,Enh…
GO:0051100	negative regulation of binding	1.66453	118	70.8909	8.57e-06	1.56414	48	30.6877	0.0102	Arhgap28,Atp2a3,C9orf72,Camk1,Carm1,Cdkn1a,Dact1,Ddit3,Dhrs7b,Disc1,Dkk1,Dtnbp1,E2f1,Epb41l5,Ercc4,Fbxw7,Habp4,Hand1,Hand2,Hey1,Hmga2,Hspa4,Il10,Jun,Lef1,Lhx2,Mecp2,Myc,Nek2,Nfib,P2ry1,Pcsk9,Pex14,Pln,Ppara,Ppp3ca,Psen1,Psme3ip1,Ralb,Rgma,Rock1,Sorl1,Tmbim6,Tnks,Wfikkn2,Ybx2,Zfp462,Zfp90		Enhancers_Heart_12127,Enhancers_Heart_12354,Enhancers_Heart_14213,Enhancers_Heart_14474,Enhancers_Heart_14686,Enhancers_Heart_15232,Enhancers_Heart_15382,Enhancers_Heart_16761,Enhancers_Heart_16764,Enhancers_Heart_20880,Enhancers_Heart_20881,Enhancers_Heart_20882,Enhancers_Heart_20906,Enhancers_Heart_20908,Enhancers_Heart_20937,Enhancers_Heart_20974,Enhancers_Heart_21915,Enhancers_Heart_24891,Enh…
GO:0043087	regulation of GTPase activity	1.4017	247	176.215	8.59e-06	1.73287	107	61.7474	2.58e-07	Abr,Adrb1,Afdn,Amot,Arap1,Arap2,Arap3,Arhgap15,Arhgap24,Arhgap25,Arhgap29,Arhgap35,Arhgap44,Arhgef10,Arhgef26,Asap1,Asap2,Bcar3,Bcas3,Bcr,C9orf72,Cav2,Ccl12,Ccl17,Cd40,Cdkl5,Chn2,Dab2ip,Dennd1a,Dgki,Dock9,Dvl3,Efna5,Epha2,Epha4,Ephb3,Erbb2,Gm49510,Gnao1,Gnas,Gpr65,Itga6,Map2k1,Map4k4,Mapre2,Mex3b,Mtss2,Net1,Ntf3,Ntrk1,Ntrk2,Pkp4,Plxna1,Plxna2,Plxnb1,Prkg1,Ptk2b,Rabgap1l,Ralgapa2,Ralgps1,Ralgps2,R…		Enhancers_Heart_10078,Enhancers_Heart_12586,Enhancers_Heart_14919,Enhancers_Heart_15425,Enhancers_Heart_15430,Enhancers_Heart_15729,Enhancers_Heart_15730,Enhancers_Heart_1607,Enhancers_Heart_16176,Enhancers_Heart_16324,Enhancers_Heart_17154,Enhancers_Heart_17185,Enhancers_Heart_18715,Enhancers_Heart_18717,Enhancers_Heart_19608,Enhancers_Heart_19978,Enhancers_Heart_19980,Enhancers_Heart_19984,Enha…
GO:0032330	regulation of chondrocyte differentiation	1.86546	83	44.4931	8.68e-06	2.36577	22	9.29931	0.00103	Adamts7,Bmp4,Chadl,Ctnnb1,Gli2,Gli3,Loxl2,Maf,Mkx,Pkdcc,Por,Pthlh,Rarb,Runx2,Shox2,Smad3,Smad7,Sox6,Sox9,Thrb,Trps1,Zbtb16		Enhancers_Heart_18073,Enhancers_Heart_23765,Enhancers_Heart_27832,Enhancers_Heart_27833,Enhancers_Heart_27834,Enhancers_Heart_27845,Enhancers_Heart_27846,Enhancers_Heart_27869,Enhancers_Heart_27870,Enhancers_Heart_27884,Enhancers_Heart_27886,Enhancers_Heart_27887,Enhancers_Heart_27895,Enhancers_Heart_27899,Enhancers_Heart_27923,Enhancers_Heart_27925,Enhancers_Heart_27935,Enhancers_Heart_27941,Enh…
GO:0046488	phosphatidylinositol metabolic process	1.77143	96	54.1934	8.98e-06	1.59849	44	27.526	0.0102	Atg14,Cdipt,Cds1,Cish,Dpm1,Efr3b,Inpp1,Inpp4b,Inpp5a,Inpp5d,Inpp5k,Ip6k2,Itpkc,Lclat1,Mtmr10,Mtmr2,Mtmr3,Pdgfa,Pgap1,Piga,Pigc,Pigh,Pigu,Pik3c2a,Pik3c2b,Pik3c2g,Pik3c3,Pik3ca,Pik3cb,Pik3cg,Pik3r1,Pik3r3,Pik3r4,Pip4k2a,Pip4k2b,Pip5k1b,Plcb1,Pten,Socs1,Socs5,Synj2,Ttc7,Ttc7b,Vac14		Enhancers_Heart_1171,Enhancers_Heart_1249,Enhancers_Heart_12622,Enhancers_Heart_12623,Enhancers_Heart_1274,Enhancers_Heart_15623,Enhancers_Heart_17084,Enhancers_Heart_18979,Enhancers_Heart_19874,Enhancers_Heart_19882,Enhancers_Heart_19889,Enhancers_Heart_21442,Enhancers_Heart_21443,Enhancers_Heart_22502,Enhancers_Heart_22546,Enhancers_Heart_22551,Enhancers_Heart_22561,Enhancers_Heart_22569,Enhanc…
GO:0045670	regulation of osteoclast differentiation	1.90946	76	39.8018	9.73e-06	1.83941	26	14.135	0.0126	Cartpt,Ceacam10,Ctnnb1,Fbxw7,Fgfr3,Fos,Gnas,Gpr68,Ifng,Il17a,Inpp4b,Inpp5d,Lrrc17,Mitf,Notch2,Pik3r1,Pou4f1,Ppargc1b,Ppp3ca,Rassf2,Tjp2,Tmem178,Tnfrsf11b,Tnfsf11,Ubash3b,Zbtb7a		Enhancers_Heart_10572,Enhancers_Heart_12078,Enhancers_Heart_202,Enhancers_Heart_22066,Enhancers_Heart_22069,Enhancers_Heart_22072,Enhancers_Heart_22073,Enhancers_Heart_22074,Enhancers_Heart_22091,Enhancers_Heart_22603,Enhancers_Heart_22604,Enhancers_Heart_22615,Enhancers_Heart_22629,Enhancers_Heart_2660,Enhancers_Heart_26761,Enhancers_Heart_26763,Enhancers_Heart_26764,Enhancers_Heart_26765,Enhanc…
GO:0005975	carbohydrate metabolic process	1.36481	281	205.89	1.04e-05	1.28114	127	99.1307	0.0163	Actn3,Adrb1,Akr1a1,Akr1b3,Aoah,App,Arpp19,Atf3,Avpr1b,B3galnt1,B3galt1,B3galt2,B3gat2,B3gnt2,B3gnt7,B4galt1,B4galt3,B4galt5,C1qtnf3,Chst2,Chst9,Cry1,Csgalnact1,Dusp12,Dyrk2,Edem3,Enpp1,Epm2a,Esrrb,Ext1,Ext2,Fabp5,Fbp2,Fggy,Foxa2,Foxk1,Foxo1,Fpgt,Gbe1,Gfpt1,Git1,Gpi1,Gyg,H6pd,Has2,Hdac4,Hif1a,Hs2st1,Idh2,Ifng,Igf1,Igf2,Inpp1,Inpp4b,Inpp5a,Inpp5k,Irs1,Kat2b,Kcnj11,Kcnq1,Lancl2,Lancl3,Lctl,Ldha,Lep,…		Enhancers_Heart_10572,Enhancers_Heart_10907,Enhancers_Heart_10909,Enhancers_Heart_10910,Enhancers_Heart_10929,Enhancers_Heart_10930,Enhancers_Heart_10931,Enhancers_Heart_11001,Enhancers_Heart_1171,Enhancers_Heart_12078,Enhancers_Heart_12093,Enhancers_Heart_13168,Enhancers_Heart_15211,Enhancers_Heart_15623,Enhancers_Heart_15851,Enhancers_Heart_16882,Enhancers_Heart_16884,Enhancers_Heart_16885,Enha…
GO:0019637	organophosphate metabolic process	1.29812	383	295.042	1.04e-05	1.2203	197	161.436	0.0142	1700009N14Rik,Abhd12b,Abhd5,Abhd6,Acaca,Acadsb,Acot11,Acsl4,Acsl6,Actn3,Ada,Adcy6,Adcy8,Adcy9,Adsl,Agpat4,Ampd2,App,Atg14,Atp5o,Avpr1b,Baat,Cacnb4,Cdipt,Cds1,Chka,Cish,Ckmt2,Cln8,Crls1,Dgkb,Dgki,Dhodh,Dhrs7b,Dip2a,Dpm1,Efl1,Efr3b,Enpp1,Enpp3,Enpp5,Enpp7,Entpd4b,Entpd5,Epha2,Erbb4,Esrrb,Fabp5,Far1,Fbp2,Foxk1,Gda,Gfpt1,Git1,Gm45837,Gnai3,Gpi1,Grk3,Gtpbp1,Gucy1a1,Gucy1b1,H6pd,Haao,Hdac4,Hif1a,Hmgcs2…		Enhancers_Heart_10219,Enhancers_Heart_10572,Enhancers_Heart_10907,Enhancers_Heart_10909,Enhancers_Heart_10910,Enhancers_Heart_10929,Enhancers_Heart_10930,Enhancers_Heart_10931,Enhancers_Heart_11001,Enhancers_Heart_11356,Enhancers_Heart_11363,Enhancers_Heart_11368,Enhancers_Heart_11378,Enhancers_Heart_11394,Enhancers_Heart_1171,Enhancers_Heart_12078,Enhancers_Heart_1249,Enhancers_Heart_12622,Enhan…
GO:0031098	stress-activated protein kinase signaling cascade	1.46828	192	130.765	1.06e-05	1.65949	75	45.1947	0.000121	Aida,Aida,Akr1b3,App,Bmp2,Bmp4,Ccdc88c,Cdc42,Ceacam10,Crhr2,Dab2ip,Dact1,Dlg1,Dusp1,Dusp10,Dusp22,Ephb1,Fas,Fgfr3,Foxo1,Gadd45g,Gm28047,Hand2,Hgf,Hipk2,Hipk3,Igf1r,Irak1,Kat7,Lep,Lmnb1,Map2k1,Map2k2,Map2k6,Map3k4,Map4k4,Mapk1,Mapk10,Mapkapk2,Mecom,Mfhas1,Mid1,Mturn,Nppa,Pbk,Phlpp1,Plcb1,Ptk2b,Rapgef1,Rassf2,Rb1cc1,Rell1,Ror2,Sash1,Sh3rf1,Sirpb1c,Smad3,Spag9,Stk3,Stk39,Taok3,Tgfb2,Tlr3,Tnfrsf19,Tn…		Enhancers_Heart_10572,Enhancers_Heart_16761,Enhancers_Heart_16764,Enhancers_Heart_16896,Enhancers_Heart_16911,Enhancers_Heart_18011,Enhancers_Heart_18014,Enhancers_Heart_18015,Enhancers_Heart_20880,Enhancers_Heart_20881,Enhancers_Heart_20882,Enhancers_Heart_20906,Enhancers_Heart_20908,Enhancers_Heart_20937,Enhancers_Heart_20974,Enhancers_Heart_21489,Enhancers_Heart_21545,Enhancers_Heart_21547,Enh…
GO:0030335	positive regulation of cell migration	1.29932	381	293.23	1.1e-05	1.55848	160	102.664	2.05e-07	Abcc1,Ackr3,Acp5,Acta2,Actn4,Acvr1,Adam17,Adamts1,Adora3,Akap12,Amot,Amotl1,Angpt1,Ano6,Anxa1,App,Aqp1,Arf6,Arhgap5,Arhgef2,Arhgef39,Bcas3,Bmp2,Bmp4,Camk2d,Capn7,Ccbe1,Ccl12,Cd40,Cdh13,Cemip,Cib1,Cmklr1,Ctsh,Cxcl12,Cxcl17,Dab2ip,Dapk2,Ddr2,Dock4,Dock5,Edn1,Edn2,Epb41l5,Epha2,Epha4,Erbb4,Ets1,Fgf1,Fgf9,Fgr,Flt1,Foxf1,Foxp1,Furin,Fzd4,Gab1,Gpi1,Has2,Hdac4,Hdac7,Hdac9,Hgf,Hif1a,Hspb1,Ifng,Igf1,Igf1r…		Enhancers_Heart_10907,Enhancers_Heart_10909,Enhancers_Heart_10910,Enhancers_Heart_10929,Enhancers_Heart_10930,Enhancers_Heart_10931,Enhancers_Heart_11640,Enhancers_Heart_11641,Enhancers_Heart_12078,Enhancers_Heart_12372,Enhancers_Heart_13255,Enhancers_Heart_13265,Enhancers_Heart_15623,Enhancers_Heart_15813,Enhancers_Heart_16176,Enhancers_Heart_16324,Enhancers_Heart_16761,Enhancers_Heart_16764,Enh…
GO:0051272	positive regulation of cellular component movement	1.294	388	299.847	1.23e-05	1.50991	164	108.616	1.1e-06	Abcc1,Ackr3,Acp5,Acta2,Actn4,Acvr1,Adam17,Adamts1,Adora3,Akap12,Amot,Amotl1,Angpt1,Ano6,Anxa1,App,Aqp1,Arf6,Arhgap5,Arhgef2,Arhgef39,Bcas3,Bmp2,Bmp4,Camk2d,Capn7,Ccbe1,Ccdc25,Ccl12,Cd40,Cdh13,Cemip,Cib1,Cmklr1,Ctsh,Cxcl12,Cxcl17,Dab2ip,Dapk2,Ddr2,Dock4,Dock5,Edn1,Edn2,Epb41l5,Epha2,Epha4,Erbb4,Ets1,Fez1,Fgf1,Fgf9,Fgr,Flt1,Foxf1,Foxp1,Furin,Fzd4,Gab1,Gpi1,Has2,Hdac4,Hdac7,Hdac9,Hgf,Hif1a,Hspb1,Ifn…		Enhancers_Heart_10572,Enhancers_Heart_10907,Enhancers_Heart_10909,Enhancers_Heart_10910,Enhancers_Heart_10929,Enhancers_Heart_10930,Enhancers_Heart_10931,Enhancers_Heart_11640,Enhancers_Heart_11641,Enhancers_Heart_12078,Enhancers_Heart_12372,Enhancers_Heart_13255,Enhancers_Heart_13265,Enhancers_Heart_15623,Enhancers_Heart_15813,Enhancers_Heart_16176,Enhancers_Heart_16324,Enhancers_Heart_16761,Enh…
GO:0002027	regulation of heart rate	1.65724	116	69.9958	1.26e-05	1.74104	34	19.5286	0.00837	Ada,Adra1a,Adrb1,Cacna1c,Cacna2d1,Calm1,Calm2,Crhr2,Ctnna3,Edn1,Edn2,Ednrb,Epas1,Gch1,Gja5,Hcn4,Irx5,Jup,Kcna5,Kcnj2,Kcnj5,Kcnq1,Myh6,Nos1ap,Nppa,Pik3r1,Pln,Pmch,Sema3a,Shox2,Slc8a1,Srebf1,Tmem161b,Tpm1		Enhancers_Heart_10929,Enhancers_Heart_10930,Enhancers_Heart_10931,Enhancers_Heart_14640,Enhancers_Heart_14641,Enhancers_Heart_14643,Enhancers_Heart_14655,Enhancers_Heart_17274,Enhancers_Heart_18039,Enhancers_Heart_18045,Enhancers_Heart_18046,Enhancers_Heart_18049,Enhancers_Heart_18057,Enhancers_Heart_18058,Enhancers_Heart_22502,Enhancers_Heart_22546,Enhancers_Heart_22551,Enhancers_Heart_22561,Enh…
GO:2000147	positive regulation of cell motility	1.29436	384	296.671	1.26e-05	1.52013	162	106.57	8.48e-07	Abcc1,Ackr3,Acp5,Acta2,Actn4,Acvr1,Adam17,Adamts1,Adora3,Akap12,Amot,Amotl1,Angpt1,Ano6,Anxa1,App,Aqp1,Arf6,Arhgap5,Arhgef2,Arhgef39,Bcas3,Bmp2,Bmp4,Camk2d,Capn7,Ccbe1,Ccdc25,Ccl12,Cd40,Cdh13,Cemip,Cib1,Cmklr1,Ctsh,Cxcl12,Cxcl17,Dab2ip,Dapk2,Ddr2,Dock4,Dock5,Edn1,Edn2,Epb41l5,Epha2,Epha4,Erbb4,Ets1,Fgf1,Fgf9,Fgr,Flt1,Foxf1,Foxp1,Furin,Fzd4,Gab1,Gpi1,Has2,Hdac4,Hdac7,Hdac9,Hgf,Hif1a,Hspb1,Ifng,Igf…		Enhancers_Heart_10572,Enhancers_Heart_10907,Enhancers_Heart_10909,Enhancers_Heart_10910,Enhancers_Heart_10929,Enhancers_Heart_10930,Enhancers_Heart_10931,Enhancers_Heart_11640,Enhancers_Heart_11641,Enhancers_Heart_12078,Enhancers_Heart_12372,Enhancers_Heart_13255,Enhancers_Heart_13265,Enhancers_Heart_15623,Enhancers_Heart_15813,Enhancers_Heart_16176,Enhancers_Heart_16324,Enhancers_Heart_16761,Enh…
GO:0062012	regulation of small molecule metabolic process	1.44253	207	143.498	1.35e-05	1.31738	86	65.2812	0.0333	Abcd2,Acmsd,Acsl4,Actn3,Anxa1,App,Arpp19,Avpr1b,Bmp2,C1qtnf3,Cd320,Ceacam10,Cry1,Dkk3,Dusp12,Dyrk2,Enpp1,Erlin2,Esrrb,Fabp5,Fgf1,Foxa2,Foxk1,Foxo1,Gfpt1,Git1,H6pd,Hdac4,Hif1a,Ifng,Igf1,Igf2,Inpp5k,Irs1,Isx,Kat2b,Kcnma1,Lep,Lmf1,Lonp2,Map2k1,Mid1ip1,Myc,Nfe2l1,Nln,Nr1h3,Nr1h4,Nr3c1,Nr4a3,P2ry1,Pank2,Parp1,Pdk2,Pfkfb2,Phlda2,Pla2g4a,Por,Pou1f1,Ppara,Ppargc1a,Ppp1cb,Ppp1r3a,Ppp1r3b,Prkag2,Prkce,Prox…		Enhancers_Heart_10572,Enhancers_Heart_10907,Enhancers_Heart_10909,Enhancers_Heart_10910,Enhancers_Heart_10929,Enhancers_Heart_10930,Enhancers_Heart_10931,Enhancers_Heart_11001,Enhancers_Heart_12078,Enhancers_Heart_12093,Enhancers_Heart_12405,Enhancers_Heart_14640,Enhancers_Heart_14641,Enhancers_Heart_14643,Enhancers_Heart_14655,Enhancers_Heart_15623,Enhancers_Heart_15851,Enhancers_Heart_16882,Enh…
GO:0048382	mesendoderm development	3.54295	23	6.49176	1.38e-05	3.76372	7	1.85986	0.00893	Bmpr1a,Eomes,Foxa2,Otx2,Smad4,Ssbp3,Zfp36l1		Enhancers_Heart_21489,Enhancers_Heart_21545,Enhancers_Heart_21547,Enhancers_Heart_27772,Enhancers_Heart_29061,Enhancers_Heart_29065,Enhancers_Heart_29084,Enhancers_Heart_29421,Enhancers_Heart_29422,Enhancers_Heart_29423,Enhancers_Heart_29424,Enhancers_Heart_46746,Enhancers_Heart_56147,Enhancers_Heart_56168,Enhancers_Heart_56169,Enhancers_Heart_65977,Enhancers_Heart_65978,Enhancers_Heart_65985,Enh…
GO:0008286	insulin receptor signaling pathway	1.75996	94	53.4104	1.41e-05	1.59152	37	23.2483	0.0219	Appl1,Bcar3,Cav2,Dnai1,Enpp1,Foxo1,Grb14,Igf1r,Igf2,Inpp5k,Irs1,Lep,Mfn2,Nck1,Nck1,Nr1h4,Nucks1,Pak1,Pdk2,Pik3r1,Pik3r3,Pip4k2a,Pip4k2b,Plcb1,Prkcq,Ptpn1,Ptprj,Rpe65,Sh2b2,Sik2,Slc39a14,Socs1,Soga1,Sorbs1,Sorl1,Src,Srebf1		Enhancers_Heart_11001,Enhancers_Heart_14640,Enhancers_Heart_14641,Enhancers_Heart_14643,Enhancers_Heart_14655,Enhancers_Heart_15623,Enhancers_Heart_16882,Enhancers_Heart_16884,Enhancers_Heart_16885,Enhancers_Heart_17084,Enhancers_Heart_2407,Enhancers_Heart_2411,Enhancers_Heart_2418,Enhancers_Heart_2423,Enhancers_Heart_26806,Enhancers_Heart_26841,Enhancers_Heart_26856,Enhancers_Heart_26857,Enhance…
												Enhancers_Heart_10572,Enhancers_Heart_11640,Enhancers_Heart_11641,Enhancers_Heart_12078,Enhancers_Heart_12593,Enhancers_Heart_12615,Enhancers_Heart_16896,Enhancers_Heart_16911,Enhancers_Heart_202,Enhancers_Heart_21078,Enhancers_Heart_21108,Enhancers_Heart_21114,Enhancers_Heart_21123,Enhancers_Heart_21125,Enhancers_Heart_21141,Enhancers_Heart_21489,Enhancers_Heart_21545,Enhancers_Heart_21547,Enhan…
												Enhancers_Heart_10572,Enhancers_Heart_16761,Enhancers_Heart_16764,Enhancers_Heart_18011,Enhancers_Heart_18014,Enhancers_Heart_18015,Enhancers_Heart_20880,Enhancers_Heart_20881,Enhancers_Heart_20882,Enhancers_Heart_20906,Enhancers_Heart_20908,Enhancers_Heart_20937,Enhancers_Heart_20974,Enhancers_Heart_21489,Enhancers_Heart_21545,Enhancers_Heart_21547,Enhancers_Heart_24086,Enhancers_Heart_24094,Enh…
												Enhancers_Heart_10108,Enhancers_Heart_10219,Enhancers_Heart_10907,Enhancers_Heart_10909,Enhancers_Heart_10910,Enhancers_Heart_10929,Enhancers_Heart_10930,Enhancers_Heart_10931,Enhancers_Heart_1134,Enhancers_Heart_11533,Enhancers_Heart_11534,Enhancers_Heart_11547,Enhancers_Heart_11551,Enhancers_Heart_12078,Enhancers_Heart_12593,Enhancers_Heart_12615,Enhancers_Heart_13255,Enhancers_Heart_13265,Enha…
												Enhancers_Heart_12372,Enhancers_Heart_13290,Enhancers_Heart_22066,Enhancers_Heart_22069,Enhancers_Heart_22072,Enhancers_Heart_22073,Enhancers_Heart_22074,Enhancers_Heart_22091,Enhancers_Heart_22111,Enhancers_Heart_22115,Enhancers_Heart_22118,Enhancers_Heart_25364,Enhancers_Heart_25557,Enhancers_Heart_28319,Enhancers_Heart_28320,Enhancers_Heart_28323,Enhancers_Heart_28329,Enhancers_Heart_28339,Enh…
												Enhancers_Heart_10078,Enhancers_Heart_10907,Enhancers_Heart_10909,Enhancers_Heart_10910,Enhancers_Heart_10929,Enhancers_Heart_10930,Enhancers_Heart_10931,Enhancers_Heart_12372,Enhancers_Heart_12593,Enhancers_Heart_12615,Enhancers_Heart_15729,Enhancers_Heart_15730,Enhancers_Heart_20060,Enhancers_Heart_20064,Enhancers_Heart_20085,Enhancers_Heart_26195,Enhancers_Heart_26212,Enhancers_Heart_26213,Enh…
												Enhancers_Heart_10572,Enhancers_Heart_12078,Enhancers_Heart_202,Enhancers_Heart_22066,Enhancers_Heart_22069,Enhancers_Heart_22072,Enhancers_Heart_22073,Enhancers_Heart_22074,Enhancers_Heart_22091,Enhancers_Heart_22603,Enhancers_Heart_22604,Enhancers_Heart_22615,Enhancers_Heart_22629,Enhancers_Heart_2660,Enhancers_Heart_26761,Enhancers_Heart_26763,Enhancers_Heart_26764,Enhancers_Heart_26765,Enhanc…
												Enhancers_Heart_14990,Enhancers_Heart_14995,Enhancers_Heart_14997,Enhancers_Heart_17274,Enhancers_Heart_17672,Enhancers_Heart_18011,Enhancers_Heart_18014,Enhancers_Heart_18015,Enhancers_Heart_18039,Enhancers_Heart_18045,Enhancers_Heart_18046,Enhancers_Heart_18049,Enhancers_Heart_18057,Enhancers_Heart_18058,Enhancers_Heart_20479,Enhancers_Heart_22502,Enhancers_Heart_22546,Enhancers_Heart_22551,Enh…
												Enhancers_Heart_10829,Enhancers_Heart_10833,Enhancers_Heart_14640,Enhancers_Heart_14641,Enhancers_Heart_14643,Enhancers_Heart_14655,Enhancers_Heart_21078,Enhancers_Heart_21108,Enhancers_Heart_21114,Enhancers_Heart_21123,Enhancers_Heart_21125,Enhancers_Heart_21141,Enhancers_Heart_35993,Enhancers_Heart_36001,Enhancers_Heart_36005,Enhancers_Heart_53937,Enhancers_Heart_60252,Enhancers_Heart_60269,Enh…
												Enhancers_Heart_10907,Enhancers_Heart_10909,Enhancers_Heart_10910,Enhancers_Heart_10929,Enhancers_Heart_10930,Enhancers_Heart_10931,Enhancers_Heart_16620,Enhancers_Heart_20479,Enhancers_Heart_24673,Enhancers_Heart_24840,Enhancers_Heart_24891,Enhancers_Heart_26195,Enhancers_Heart_26212,Enhancers_Heart_26213,Enhancers_Heart_26227,Enhancers_Heart_26239,Enhancers_Heart_26247,Enhancers_Heart_26248,Enh…
												Enhancers_Heart_14640,Enhancers_Heart_14641,Enhancers_Heart_14643,Enhancers_Heart_14655,Enhancers_Heart_14919,Enhancers_Heart_18073,Enhancers_Heart_21078,Enhancers_Heart_21108,Enhancers_Heart_21114,Enhancers_Heart_21123,Enhancers_Heart_21125,Enhancers_Heart_21141,Enhancers_Heart_22066,Enhancers_Heart_22069,Enhancers_Heart_22072,Enhancers_Heart_22073,Enhancers_Heart_22074,Enhancers_Heart_22091,Enh…
												Enhancers_Heart_11726,Enhancers_Heart_15211,Enhancers_Heart_16324,Enhancers_Heart_18073,Enhancers_Heart_1967,Enhancers_Heart_19978,Enhancers_Heart_19980,Enhancers_Heart_19984,Enhancers_Heart_19985,Enhancers_Heart_19996,Enhancers_Heart_19997,Enhancers_Heart_20007,Enhancers_Heart_20013,Enhancers_Heart_20015,Enhancers_Heart_20023,Enhancers_Heart_20048,Enhancers_Heart_20060,Enhancers_Heart_20064,Enha…
												Enhancers_Heart_10572,Enhancers_Heart_20880,Enhancers_Heart_20881,Enhancers_Heart_20882,Enhancers_Heart_20906,Enhancers_Heart_20908,Enhancers_Heart_20937,Enhancers_Heart_20974,Enhancers_Heart_24086,Enhancers_Heart_24094,Enhancers_Heart_24095,Enhancers_Heart_25292,Enhancers_Heart_28695,Enhancers_Heart_28697,Enhancers_Heart_28698,Enhancers_Heart_29,Enhancers_Heart_29220,Enhancers_Heart_29243,Enhanc…
												Enhancers_Heart_10907,Enhancers_Heart_10909,Enhancers_Heart_10910,Enhancers_Heart_10929,Enhancers_Heart_10930,Enhancers_Heart_10931,Enhancers_Heart_11640,Enhancers_Heart_11641,Enhancers_Heart_12593,Enhancers_Heart_12615,Enhancers_Heart_16884,Enhancers_Heart_16885,Enhancers_Heart_23765,Enhancers_Heart_28695,Enhancers_Heart_28697,Enhancers_Heart_28698,Enhancers_Heart_29061,Enhancers_Heart_29065,Enh…
												Enhancers_Heart_1134,Enhancers_Heart_11533,Enhancers_Heart_11534,Enhancers_Heart_11547,Enhancers_Heart_11551,Enhancers_Heart_15851,Enhancers_Heart_18073,Enhancers_Heart_21078,Enhancers_Heart_21108,Enhancers_Heart_21114,Enhancers_Heart_21123,Enhancers_Heart_21125,Enhancers_Heart_21141,Enhancers_Heart_26153,Enhancers_Heart_26154,Enhancers_Heart_26155,Enhancers_Heart_26156,Enhancers_Heart_26161,Enha…
												Enhancers_Heart_12078,Enhancers_Heart_2660,Enhancers_Heart_26761,Enhancers_Heart_26763,Enhancers_Heart_26764,Enhancers_Heart_26765,Enhancers_Heart_26766,Enhancers_Heart_26769,Enhancers_Heart_26806,Enhancers_Heart_26841,Enhancers_Heart_26856,Enhancers_Heart_26857,Enhancers_Heart_26861,Enhancers_Heart_26886,Enhancers_Heart_26888,Enhancers_Heart_26889,Enhancers_Heart_26893,Enhancers_Heart_26897,Enha…
												Enhancers_Heart_15211,Enhancers_Heart_1967,Enhancers_Heart_19978,Enhancers_Heart_19980,Enhancers_Heart_19984,Enhancers_Heart_19985,Enhancers_Heart_19996,Enhancers_Heart_19997,Enhancers_Heart_20007,Enhancers_Heart_20013,Enhancers_Heart_20015,Enhancers_Heart_20023,Enhancers_Heart_20048,Enhancers_Heart_29220,Enhancers_Heart_29243,Enhancers_Heart_29252,Enhancers_Heart_33738,Enhancers_Heart_62293,Enha…
												Enhancers_Heart_21489,Enhancers_Heart_21545,Enhancers_Heart_21547,Enhancers_Heart_25292,Enhancers_Heart_29220,Enhancers_Heart_29243,Enhancers_Heart_29252,Enhancers_Heart_3385,Enhancers_Heart_3391,Enhancers_Heart_35698,Enhancers_Heart_35707,Enhancers_Heart_37004,Enhancers_Heart_37005,Enhancers_Heart_3799,Enhancers_Heart_3809,Enhancers_Heart_39509,Enhancers_Heart_39969,Enhancers_Heart_41012,Enhance…
												Enhancers_Heart_10907,Enhancers_Heart_10909,Enhancers_Heart_10910,Enhancers_Heart_10929,Enhancers_Heart_10930,Enhancers_Heart_10931,Enhancers_Heart_12078,Enhancers_Heart_12093,Enhancers_Heart_15623,Enhancers_Heart_22185,Enhancers_Heart_22200,Enhancers_Heart_2407,Enhancers_Heart_2411,Enhancers_Heart_2418,Enhancers_Heart_2423,Enhancers_Heart_49167,Enhancers_Heart_49168,Enhancers_Heart_69867,Enhance…
												Enhancers_Heart_10078,Enhancers_Heart_10108,Enhancers_Heart_10949,Enhancers_Heart_10980,Enhancers_Heart_10981,Enhancers_Heart_10983,Enhancers_Heart_11001,Enhancers_Heart_12372,Enhancers_Heart_13290,Enhancers_Heart_13529,Enhancers_Heart_13532,Enhancers_Heart_13533,Enhancers_Heart_13552,Enhancers_Heart_13557,Enhancers_Heart_14676,Enhancers_Heart_14919,Enhancers_Heart_15623,Enhancers_Heart_15729,Enh…
												Enhancers_Heart_10829,Enhancers_Heart_10833,Enhancers_Heart_10864,Enhancers_Heart_10865,Enhancers_Heart_1317,Enhancers_Heart_1318,Enhancers_Heart_1319,Enhancers_Heart_1324,Enhancers_Heart_1327,Enhancers_Heart_14474,Enhancers_Heart_14990,Enhancers_Heart_15232,Enhancers_Heart_18367,Enhancers_Heart_18651,Enhancers_Heart_19874,Enhancers_Heart_19882,Enhancers_Heart_19889,Enhancers_Heart_21915,Enhancer…
												Enhancers_Heart_11001,Enhancers_Heart_1171,Enhancers_Heart_1249,Enhancers_Heart_12622,Enhancers_Heart_12623,Enhancers_Heart_1274,Enhancers_Heart_14284,Enhancers_Heart_14311,Enhancers_Heart_14618,Enhancers_Heart_14640,Enhancers_Heart_14641,Enhancers_Heart_14643,Enhancers_Heart_14655,Enhancers_Heart_14686,Enhancers_Heart_15623,Enhancers_Heart_17084,Enhancers_Heart_18606,Enhancers_Heart_18979,Enhanc…
												Enhancers_Heart_10572,Enhancers_Heart_11640,Enhancers_Heart_11641,Enhancers_Heart_12078,Enhancers_Heart_12593,Enhancers_Heart_12615,Enhancers_Heart_14294,Enhancers_Heart_14686,Enhancers_Heart_202,Enhancers_Heart_21489,Enhancers_Heart_21545,Enhancers_Heart_21547,Enhancers_Heart_21915,Enhancers_Heart_22066,Enhancers_Heart_22069,Enhancers_Heart_22072,Enhancers_Heart_22073,Enhancers_Heart_22074,Enhan…
												Enhancers_Heart_10907,Enhancers_Heart_10909,Enhancers_Heart_10910,Enhancers_Heart_10929,Enhancers_Heart_10930,Enhancers_Heart_10931,Enhancers_Heart_11001,Enhancers_Heart_11533,Enhancers_Heart_11534,Enhancers_Heart_11547,Enhancers_Heart_11551,Enhancers_Heart_12372,Enhancers_Heart_14990,Enhancers_Heart_15046,Enhancers_Heart_15048,Enhancers_Heart_15049,Enhancers_Heart_15055,Enhancers_Heart_15056,Enh…
												Enhancers_Heart_10907,Enhancers_Heart_10909,Enhancers_Heart_10910,Enhancers_Heart_10929,Enhancers_Heart_10930,Enhancers_Heart_10931,Enhancers_Heart_16620,Enhancers_Heart_20479,Enhancers_Heart_24673,Enhancers_Heart_24840,Enhancers_Heart_24891,Enhancers_Heart_26195,Enhancers_Heart_26212,Enhancers_Heart_26213,Enhancers_Heart_26227,Enhancers_Heart_26239,Enhancers_Heart_26247,Enhancers_Heart_26248,Enh…
												Enhancers_Heart_10078,Enhancers_Heart_10108,Enhancers_Heart_10907,Enhancers_Heart_10909,Enhancers_Heart_10910,Enhancers_Heart_10929,Enhancers_Heart_10930,Enhancers_Heart_10931,Enhancers_Heart_12593,Enhancers_Heart_12615,Enhancers_Heart_13290,Enhancers_Heart_13666,Enhancers_Heart_14640,Enhancers_Heart_14641,Enhancers_Heart_14643,Enhancers_Heart_14655,Enhancers_Heart_15169,Enhancers_Heart_15524,Enh…
												Enhancers_Heart_10208,Enhancers_Heart_10572,Enhancers_Heart_10829,Enhancers_Heart_10833,Enhancers_Heart_11640,Enhancers_Heart_11641,Enhancers_Heart_12078,Enhancers_Heart_12593,Enhancers_Heart_12615,Enhancers_Heart_16896,Enhancers_Heart_16911,Enhancers_Heart_17154,Enhancers_Heart_202,Enhancers_Heart_21078,Enhancers_Heart_21108,Enhancers_Heart_21114,Enhancers_Heart_21123,Enhancers_Heart_21125,Enhan…
												Enhancers_Heart_104,Enhancers_Heart_129,Enhancers_Heart_13529,Enhancers_Heart_13532,Enhancers_Heart_13533,Enhancers_Heart_13552,Enhancers_Heart_13557,Enhancers_Heart_14618,Enhancers_Heart_16761,Enhancers_Heart_16764,Enhancers_Heart_16982,Enhancers_Heart_18073,Enhancers_Heart_19158,Enhancers_Heart_24673,Enhancers_Heart_25364,Enhancers_Heart_25489,Enhancers_Heart_28695,Enhancers_Heart_28697,Enhance…
												Enhancers_Heart_10907,Enhancers_Heart_10909,Enhancers_Heart_10910,Enhancers_Heart_10929,Enhancers_Heart_10930,Enhancers_Heart_10931,Enhancers_Heart_11001,Enhancers_Heart_1134,Enhancers_Heart_11533,Enhancers_Heart_11534,Enhancers_Heart_11547,Enhancers_Heart_11551,Enhancers_Heart_11726,Enhancers_Heart_12127,Enhancers_Heart_12593,Enhancers_Heart_12615,Enhancers_Heart_13529,Enhancers_Heart_13532,Enha…
												Enhancers_Heart_10907,Enhancers_Heart_10909,Enhancers_Heart_10910,Enhancers_Heart_10929,Enhancers_Heart_10930,Enhancers_Heart_10931,Enhancers_Heart_12078,Enhancers_Heart_12093,Enhancers_Heart_15623,Enhancers_Heart_16882,Enhancers_Heart_16884,Enhancers_Heart_16885,Enhancers_Heart_21078,Enhancers_Heart_21108,Enhancers_Heart_21114,Enhancers_Heart_21123,Enhancers_Heart_21125,Enhancers_Heart_21141,Enh…
												Enhancers_Heart_10907,Enhancers_Heart_10909,Enhancers_Heart_10910,Enhancers_Heart_10929,Enhancers_Heart_10930,Enhancers_Heart_10931,Enhancers_Heart_16620,Enhancers_Heart_1967,Enhancers_Heart_20479,Enhancers_Heart_24673,Enhancers_Heart_24840,Enhancers_Heart_24891,Enhancers_Heart_26195,Enhancers_Heart_26212,Enhancers_Heart_26213,Enhancers_Heart_26227,Enhancers_Heart_26239,Enhancers_Heart_26247,Enha…
												Enhancers_Heart_10078,Enhancers_Heart_10907,Enhancers_Heart_10909,Enhancers_Heart_10910,Enhancers_Heart_10929,Enhancers_Heart_10930,Enhancers_Heart_10931,Enhancers_Heart_11640,Enhancers_Heart_11641,Enhancers_Heart_13255,Enhancers_Heart_13265,Enhancers_Heart_14919,Enhancers_Heart_15169,Enhancers_Heart_15425,Enhancers_Heart_15430,Enhancers_Heart_15851,Enhancers_Heart_16884,Enhancers_Heart_16885,Enh…
												Enhancers_Heart_10572,Enhancers_Heart_10907,Enhancers_Heart_10909,Enhancers_Heart_10910,Enhancers_Heart_10929,Enhancers_Heart_10930,Enhancers_Heart_10931,Enhancers_Heart_11640,Enhancers_Heart_11641,Enhancers_Heart_12078,Enhancers_Heart_12372,Enhancers_Heart_13255,Enhancers_Heart_13265,Enhancers_Heart_15623,Enhancers_Heart_15813,Enhancers_Heart_16176,Enhancers_Heart_16324,Enhancers_Heart_16761,Enh…
												Enhancers_Heart_10208,Enhancers_Heart_10572,Enhancers_Heart_10829,Enhancers_Heart_10833,Enhancers_Heart_10948,Enhancers_Heart_12127,Enhancers_Heart_12372,Enhancers_Heart_13255,Enhancers_Heart_13265,Enhancers_Heart_15524,Enhancers_Heart_15565,Enhancers_Heart_15570,Enhancers_Heart_15572,Enhancers_Heart_15590,Enhancers_Heart_1673,Enhancers_Heart_1677,Enhancers_Heart_1678,Enhancers_Heart_16896,Enhanc…
												Enhancers_Heart_20790,Enhancers_Heart_22615,Enhancers_Heart_22629,Enhancers_Heart_3548,Enhancers_Heart_3549,Enhancers_Heart_3550,Enhancers_Heart_43827,Enhancers_Heart_43829,Enhancers_Heart_90765,Enhancers_Heart_90768,Enhancers_Heart_90771,Enhancers_Heart_90774,Enhancers_Heart_90787,Enhancers_Heart_90821,Enhancers_Heart_90822,Enhancers_Heart_90823,Enhancers_Heart_90836,Enhancers_Heart_90851
												Enhancers_Heart_10078,Enhancers_Heart_10907,Enhancers_Heart_10909,Enhancers_Heart_10910,Enhancers_Heart_10929,Enhancers_Heart_10930,Enhancers_Heart_10931,Enhancers_Heart_11640,Enhancers_Heart_11641,Enhancers_Heart_13255,Enhancers_Heart_13265,Enhancers_Heart_14919,Enhancers_Heart_15169,Enhancers_Heart_15425,Enhancers_Heart_15430,Enhancers_Heart_15851,Enhancers_Heart_16884,Enhancers_Heart_16885,Enh…
												Enhancers_Heart_10219,Enhancers_Heart_11726,Enhancers_Heart_14919,Enhancers_Heart_19978,Enhancers_Heart_19980,Enhancers_Heart_19984,Enhancers_Heart_19985,Enhancers_Heart_19996,Enhancers_Heart_19997,Enhancers_Heart_20007,Enhancers_Heart_20013,Enhancers_Heart_20015,Enhancers_Heart_20023,Enhancers_Heart_20048,Enhancers_Heart_22066,Enhancers_Heart_22069,Enhancers_Heart_22072,Enhancers_Heart_22073,Enh…
												Enhancers_Heart_11533,Enhancers_Heart_11534,Enhancers_Heart_11547,Enhancers_Heart_11551,Enhancers_Heart_18073,Enhancers_Heart_21078,Enhancers_Heart_21108,Enhancers_Heart_21114,Enhancers_Heart_21123,Enhancers_Heart_21125,Enhancers_Heart_21141,Enhancers_Heart_26153,Enhancers_Heart_26154,Enhancers_Heart_26155,Enhancers_Heart_26156,Enhancers_Heart_26161,Enhancers_Heart_26176,Enhancers_Heart_26195,Enh…
												Enhancers_Heart_10907,Enhancers_Heart_10909,Enhancers_Heart_10910,Enhancers_Heart_10929,Enhancers_Heart_10930,Enhancers_Heart_10931,Enhancers_Heart_12078,Enhancers_Heart_12093,Enhancers_Heart_15623,Enhancers_Heart_16882,Enhancers_Heart_16884,Enhancers_Heart_16885,Enhancers_Heart_17028,Enhancers_Heart_21078,Enhancers_Heart_21108,Enhancers_Heart_21114,Enhancers_Heart_21123,Enhancers_Heart_21125,Enh…
												Enhancers_Heart_104,Enhancers_Heart_10907,Enhancers_Heart_10909,Enhancers_Heart_10910,Enhancers_Heart_10929,Enhancers_Heart_10930,Enhancers_Heart_10931,Enhancers_Heart_11533,Enhancers_Heart_11534,Enhancers_Heart_11547,Enhancers_Heart_11551,Enhancers_Heart_129,Enhancers_Heart_14365,Enhancers_Heart_14919,Enhancers_Heart_14990,Enhancers_Heart_14995,Enhancers_Heart_14997,Enhancers_Heart_16324,Enhance…
												Enhancers_Heart_10907,Enhancers_Heart_10909,Enhancers_Heart_10910,Enhancers_Heart_10929,Enhancers_Heart_10930,Enhancers_Heart_10931,Enhancers_Heart_16620,Enhancers_Heart_1967,Enhancers_Heart_20479,Enhancers_Heart_24673,Enhancers_Heart_24840,Enhancers_Heart_24891,Enhancers_Heart_26195,Enhancers_Heart_26212,Enhancers_Heart_26213,Enhancers_Heart_26227,Enhancers_Heart_26239,Enhancers_Heart_26247,Enha…
												Enhancers_Heart_10078,Enhancers_Heart_10948,Enhancers_Heart_11299,Enhancers_Heart_12078,Enhancers_Heart_12586,Enhancers_Heart_13455,Enhancers_Heart_13464,Enhancers_Heart_13490,Enhancers_Heart_13495,Enhancers_Heart_15382,Enhancers_Heart_15425,Enhancers_Heart_15430,Enhancers_Heart_15729,Enhancers_Heart_15730,Enhancers_Heart_1607,Enhancers_Heart_16176,Enhancers_Heart_16324,Enhancers_Heart_17154,Enha…
												Enhancers_Heart_10907,Enhancers_Heart_10909,Enhancers_Heart_10910,Enhancers_Heart_10929,Enhancers_Heart_10930,Enhancers_Heart_10931,Enhancers_Heart_11726,Enhancers_Heart_14919,Enhancers_Heart_16761,Enhancers_Heart_16764,Enhancers_Heart_1967,Enhancers_Heart_19978,Enhancers_Heart_19980,Enhancers_Heart_19984,Enhancers_Heart_19985,Enhancers_Heart_19996,Enhancers_Heart_19997,Enhancers_Heart_20007,Enha…
												Enhancers_Heart_11533,Enhancers_Heart_11534,Enhancers_Heart_11547,Enhancers_Heart_11551,Enhancers_Heart_18073,Enhancers_Heart_21078,Enhancers_Heart_21108,Enhancers_Heart_21114,Enhancers_Heart_21123,Enhancers_Heart_21125,Enhancers_Heart_21141,Enhancers_Heart_26153,Enhancers_Heart_26154,Enhancers_Heart_26155,Enhancers_Heart_26156,Enhancers_Heart_26161,Enhancers_Heart_26176,Enhancers_Heart_26195,Enh…
												Enhancers_Heart_12593,Enhancers_Heart_12615,Enhancers_Heart_26195,Enhancers_Heart_26212,Enhancers_Heart_26213,Enhancers_Heart_26227,Enhancers_Heart_26239,Enhancers_Heart_26247,Enhancers_Heart_26248,Enhancers_Heart_29948,Enhancers_Heart_29958,Enhancers_Heart_73166,Enhancers_Heart_73170,Enhancers_Heart_73173,Enhancers_Heart_93500,Enhancers_Heart_93525,Enhancers_Heart_93548,Enhancers_Heart_93564,Enh…
												Enhancers_Heart_10907,Enhancers_Heart_10909,Enhancers_Heart_10910,Enhancers_Heart_10929,Enhancers_Heart_10930,Enhancers_Heart_10931,Enhancers_Heart_11640,Enhancers_Heart_11641,Enhancers_Heart_12372,Enhancers_Heart_12593,Enhancers_Heart_12615,Enhancers_Heart_13719,Enhancers_Heart_16176,Enhancers_Heart_16761,Enhancers_Heart_16764,Enhancers_Heart_17154,Enhancers_Heart_17696,Enhancers_Heart_18011,Enh…
												Enhancers_Heart_20060,Enhancers_Heart_20064,Enhancers_Heart_20085,Enhancers_Heart_26195,Enhancers_Heart_26212,Enhancers_Heart_26213,Enhancers_Heart_26227,Enhancers_Heart_26239,Enhancers_Heart_26247,Enhancers_Heart_26248,Enhancers_Heart_45986,Enhancers_Heart_45991,Enhancers_Heart_45994,Enhancers_Heart_46013,Enhancers_Heart_62327,Enhancers_Heart_6563,Enhancers_Heart_6575,Enhancers_Heart_6582,Enhanc…
												Enhancers_Heart_10829,Enhancers_Heart_10833,Enhancers_Heart_12078,Enhancers_Heart_17154,Enhancers_Heart_22603,Enhancers_Heart_22604,Enhancers_Heart_22615,Enhancers_Heart_22629,Enhancers_Heart_23765,Enhancers_Heart_2660,Enhancers_Heart_26761,Enhancers_Heart_26763,Enhancers_Heart_26764,Enhancers_Heart_26765,Enhancers_Heart_26766,Enhancers_Heart_26769,Enhancers_Heart_26806,Enhancers_Heart_26841,Enha…
												Enhancers_Heart_20085,Enhancers_Heart_28265,Enhancers_Heart_28271,Enhancers_Heart_28291,Enhancers_Heart_28292,Enhancers_Heart_43047,Enhancers_Heart_43058,Enhancers_Heart_43069,Enhancers_Heart_43103,Enhancers_Heart_43104,Enhancers_Heart_43122,Enhancers_Heart_43124,Enhancers_Heart_43138,Enhancers_Heart_44099,Enhancers_Heart_44103,Enhancers_Heart_44108,Enhancers_Heart_44111,Enhancers_Heart_49992,Enh…
												Enhancers_Heart_13529,Enhancers_Heart_13532,Enhancers_Heart_13533,Enhancers_Heart_13552,Enhancers_Heart_13557,Enhancers_Heart_1607,Enhancers_Heart_16438,Enhancers_Heart_22111,Enhancers_Heart_22115,Enhancers_Heart_22118,Enhancers_Heart_22378,Enhancers_Heart_22380,Enhancers_Heart_22381,Enhancers_Heart_22920,Enhancers_Heart_30498,Enhancers_Heart_30499,Enhancers_Heart_30501,Enhancers_Heart_35291,Enha…
												Enhancers_Heart_10907,Enhancers_Heart_10909,Enhancers_Heart_10910,Enhancers_Heart_10929,Enhancers_Heart_10930,Enhancers_Heart_10931,Enhancers_Heart_12078,Enhancers_Heart_12354,Enhancers_Heart_14919,Enhancers_Heart_16324,Enhancers_Heart_17696,Enhancers_Heart_1877,Enhancers_Heart_1967,Enhancers_Heart_19882,Enhancers_Heart_19889,Enhancers_Heart_21078,Enhancers_Heart_21108,Enhancers_Heart_21114,Enhan…
												Enhancers_Heart_10948,Enhancers_Heart_11640,Enhancers_Heart_11641,Enhancers_Heart_12372,Enhancers_Heart_14990,Enhancers_Heart_17028,Enhancers_Heart_18367,Enhancers_Heart_19404,Enhancers_Heart_19406,Enhancers_Heart_19432,Enhancers_Heart_19434,Enhancers_Heart_19438,Enhancers_Heart_21915,Enhancers_Heart_2264,Enhancers_Heart_2274,Enhancers_Heart_2294,Enhancers_Heart_2300,Enhancers_Heart_2301,Enhancer…
												Enhancers_Heart_10907,Enhancers_Heart_10909,Enhancers_Heart_10910,Enhancers_Heart_10929,Enhancers_Heart_10930,Enhancers_Heart_10931,Enhancers_Heart_12078,Enhancers_Heart_13255,Enhancers_Heart_13265,Enhancers_Heart_16324,Enhancers_Heart_16884,Enhancers_Heart_16885,Enhancers_Heart_18073,Enhancers_Heart_19615,Enhancers_Heart_19616,Enhancers_Heart_19874,Enhancers_Heart_19882,Enhancers_Heart_19889,Enh…
												Enhancers_Heart_10219,Enhancers_Heart_10907,Enhancers_Heart_10909,Enhancers_Heart_10910,Enhancers_Heart_10929,Enhancers_Heart_10930,Enhancers_Heart_10931,Enhancers_Heart_1134,Enhancers_Heart_12078,Enhancers_Heart_17154,Enhancers_Heart_19404,Enhancers_Heart_19406,Enhancers_Heart_19432,Enhancers_Heart_19434,Enhancers_Heart_19438,Enhancers_Heart_22370,Enhancers_Heart_25620,Enhancers_Heart_25625,Enha…
												Enhancers_Heart_11533,Enhancers_Heart_11534,Enhancers_Heart_11547,Enhancers_Heart_11551,Enhancers_Heart_18073,Enhancers_Heart_21078,Enhancers_Heart_21108,Enhancers_Heart_21114,Enhancers_Heart_21123,Enhancers_Heart_21125,Enhancers_Heart_21141,Enhancers_Heart_26153,Enhancers_Heart_26154,Enhancers_Heart_26155,Enhancers_Heart_26156,Enhancers_Heart_26161,Enhancers_Heart_26176,Enhancers_Heart_26195,Enh…
												Enhancers_Heart_11001,Enhancers_Heart_1171,Enhancers_Heart_1249,Enhancers_Heart_1274,Enhancers_Heart_14311,Enhancers_Heart_14618,Enhancers_Heart_14640,Enhancers_Heart_14641,Enhancers_Heart_14643,Enhancers_Heart_14655,Enhancers_Heart_14686,Enhancers_Heart_17084,Enhancers_Heart_18606,Enhancers_Heart_18979,Enhancers_Heart_19404,Enhancers_Heart_19406,Enhancers_Heart_19432,Enhancers_Heart_19434,Enhanc…
												Enhancers_Heart_10907,Enhancers_Heart_10909,Enhancers_Heart_10910,Enhancers_Heart_10929,Enhancers_Heart_10930,Enhancers_Heart_10931,Enhancers_Heart_11001,Enhancers_Heart_11533,Enhancers_Heart_11534,Enhancers_Heart_11547,Enhancers_Heart_11551,Enhancers_Heart_12372,Enhancers_Heart_14990,Enhancers_Heart_15046,Enhancers_Heart_15048,Enhancers_Heart_15049,Enhancers_Heart_15055,Enhancers_Heart_15056,Enh…
												Enhancers_Heart_10907,Enhancers_Heart_10909,Enhancers_Heart_10910,Enhancers_Heart_10929,Enhancers_Heart_10930,Enhancers_Heart_10931,Enhancers_Heart_12127,Enhancers_Heart_12372,Enhancers_Heart_13195,Enhancers_Heart_13202,Enhancers_Heart_13255,Enhancers_Heart_13265,Enhancers_Heart_13529,Enhancers_Heart_13532,Enhancers_Heart_13533,Enhancers_Heart_13552,Enhancers_Heart_13557,Enhancers_Heart_15211,Enh…
												Enhancers_Heart_10219,Enhancers_Heart_10907,Enhancers_Heart_10909,Enhancers_Heart_10910,Enhancers_Heart_10929,Enhancers_Heart_10930,Enhancers_Heart_10931,Enhancers_Heart_10948,Enhancers_Heart_11001,Enhancers_Heart_11533,Enhancers_Heart_11534,Enhancers_Heart_11547,Enhancers_Heart_11551,Enhancers_Heart_12078,Enhancers_Heart_13255,Enhancers_Heart_13265,Enhancers_Heart_13424,Enhancers_Heart_13431,Enh…
												Enhancers_Heart_10108,Enhancers_Heart_32896,Enhancers_Heart_32901,Enhancers_Heart_32931,Enhancers_Heart_32932,Enhancers_Heart_32952,Enhancers_Heart_41012,Enhancers_Heart_41047,Enhancers_Heart_45131,Enhancers_Heart_45138,Enhancers_Heart_45147,Enhancers_Heart_45159,Enhancers_Heart_45181,Enhancers_Heart_53829,Enhancers_Heart_62689,Enhancers_Heart_62690,Enhancers_Heart_62692,Enhancers_Heart_62698,Enh…
												Enhancers_Heart_24086,Enhancers_Heart_24094,Enhancers_Heart_24095,Enhancers_Heart_25292,Enhancers_Heart_28695,Enhancers_Heart_28697,Enhancers_Heart_28698,Enhancers_Heart_29,Enhancers_Heart_29220,Enhancers_Heart_29243,Enhancers_Heart_29252,Enhancers_Heart_29820,Enhancers_Heart_30210,Enhancers_Heart_30948,Enhancers_Heart_30950,Enhancers_Heart_32553,Enhancers_Heart_32570,Enhancers_Heart_34853,Enhanc…
												Enhancers_Heart_10078,Enhancers_Heart_10108,Enhancers_Heart_10219,Enhancers_Heart_10907,Enhancers_Heart_10909,Enhancers_Heart_10910,Enhancers_Heart_10929,Enhancers_Heart_10930,Enhancers_Heart_10931,Enhancers_Heart_10948,Enhancers_Heart_11640,Enhancers_Heart_11641,Enhancers_Heart_12354,Enhancers_Heart_12372,Enhancers_Heart_12593,Enhancers_Heart_12615,Enhancers_Heart_13075,Enhancers_Heart_13080,Enh…
												Enhancers_Heart_10572,Enhancers_Heart_12372,Enhancers_Heart_14466,Enhancers_Heart_14919,Enhancers_Heart_15933,Enhancers_Heart_16761,Enhancers_Heart_16764,Enhancers_Heart_16884,Enhancers_Heart_16885,Enhancers_Heart_19615,Enhancers_Heart_19616,Enhancers_Heart_20863,Enhancers_Heart_21408,Enhancers_Heart_22066,Enhancers_Heart_22069,Enhancers_Heart_22072,Enhancers_Heart_22073,Enhancers_Heart_22074,Enh…
												Enhancers_Heart_11533,Enhancers_Heart_11534,Enhancers_Heart_11547,Enhancers_Heart_11551,Enhancers_Heart_14365,Enhancers_Heart_14919,Enhancers_Heart_17274,Enhancers_Heart_17672,Enhancers_Heart_18039,Enhancers_Heart_18045,Enhancers_Heart_18046,Enhancers_Heart_18049,Enhancers_Heart_18057,Enhancers_Heart_18058,Enhancers_Heart_18073,Enhancers_Heart_20291,Enhancers_Heart_20305,Enhancers_Heart_20479,Enh…
												Enhancers_Heart_12127,Enhancers_Heart_12354,Enhancers_Heart_14213,Enhancers_Heart_14474,Enhancers_Heart_16761,Enhancers_Heart_16764,Enhancers_Heart_21915,Enhancers_Heart_25909,Enhancers_Heart_36123,Enhancers_Heart_36133,Enhancers_Heart_52180,Enhancers_Heart_56520,Enhancers_Heart_56521,Enhancers_Heart_56522,Enhancers_Heart_58141,Enhancers_Heart_58146,Enhancers_Heart_58147,Enhancers_Heart_58153,Enh…
												Enhancers_Heart_10572,Enhancers_Heart_10907,Enhancers_Heart_10909,Enhancers_Heart_10910,Enhancers_Heart_10929,Enhancers_Heart_10930,Enhancers_Heart_10931,Enhancers_Heart_12078,Enhancers_Heart_12127,Enhancers_Heart_12354,Enhancers_Heart_12593,Enhancers_Heart_12615,Enhancers_Heart_14213,Enhancers_Heart_14474,Enhancers_Heart_14919,Enhancers_Heart_16761,Enhancers_Heart_16764,Enhancers_Heart_21915,Enh…
												Enhancers_Heart_10907,Enhancers_Heart_10909,Enhancers_Heart_10910,Enhancers_Heart_10929,Enhancers_Heart_10930,Enhancers_Heart_10931,Enhancers_Heart_17274,Enhancers_Heart_19615,Enhancers_Heart_19616,Enhancers_Heart_19978,Enhancers_Heart_19980,Enhancers_Heart_19984,Enhancers_Heart_19985,Enhancers_Heart_19996,Enhancers_Heart_19997,Enhancers_Heart_20007,Enhancers_Heart_20013,Enhancers_Heart_20015,Enh…
												Enhancers_Heart_10078,Enhancers_Heart_10108,Enhancers_Heart_10829,Enhancers_Heart_10833,Enhancers_Heart_10907,Enhancers_Heart_10909,Enhancers_Heart_10910,Enhancers_Heart_10929,Enhancers_Heart_10930,Enhancers_Heart_10931,Enhancers_Heart_11640,Enhancers_Heart_11641,Enhancers_Heart_12078,Enhancers_Heart_13075,Enhancers_Heart_13080,Enhancers_Heart_15729,Enhancers_Heart_15730,Enhancers_Heart_16176,Enh…
												Enhancers_Heart_10907,Enhancers_Heart_10909,Enhancers_Heart_10910,Enhancers_Heart_10929,Enhancers_Heart_10930,Enhancers_Heart_10931,Enhancers_Heart_12078,Enhancers_Heart_12093,Enhancers_Heart_15623,Enhancers_Heart_22185,Enhancers_Heart_22200,Enhancers_Heart_2407,Enhancers_Heart_2411,Enhancers_Heart_2418,Enhancers_Heart_2423,Enhancers_Heart_33237,Enhancers_Heart_33239,Enhancers_Heart_49167,Enhance…
												Enhancers_Heart_10572,Enhancers_Heart_11640,Enhancers_Heart_11641,Enhancers_Heart_12078,Enhancers_Heart_12593,Enhancers_Heart_12615,Enhancers_Heart_202,Enhancers_Heart_21489,Enhancers_Heart_21545,Enhancers_Heart_21547,Enhancers_Heart_22066,Enhancers_Heart_22069,Enhancers_Heart_22072,Enhancers_Heart_22073,Enhancers_Heart_22074,Enhancers_Heart_22091,Enhancers_Heart_22603,Enhancers_Heart_22604,Enhan…
												Enhancers_Heart_10907,Enhancers_Heart_10909,Enhancers_Heart_10910,Enhancers_Heart_10929,Enhancers_Heart_10930,Enhancers_Heart_10931,Enhancers_Heart_17696,Enhancers_Heart_1967,Enhancers_Heart_19882,Enhancers_Heart_19889,Enhancers_Heart_21078,Enhancers_Heart_21108,Enhancers_Heart_21114,Enhancers_Heart_21123,Enhancers_Heart_21125,Enhancers_Heart_21141,Enhancers_Heart_24673,Enhancers_Heart_29061,Enha…
												Enhancers_Heart_10907,Enhancers_Heart_10909,Enhancers_Heart_10910,Enhancers_Heart_10929,Enhancers_Heart_10930,Enhancers_Heart_10931,Enhancers_Heart_12372,Enhancers_Heart_14919,Enhancers_Heart_1967,Enhancers_Heart_20291,Enhancers_Heart_20305,Enhancers_Heart_26195,Enhancers_Heart_26212,Enhancers_Heart_26213,Enhancers_Heart_26227,Enhancers_Heart_26239,Enhancers_Heart_26247,Enhancers_Heart_26248,Enha…
												Enhancers_Heart_25292,Enhancers_Heart_29220,Enhancers_Heart_29243,Enhancers_Heart_29252,Enhancers_Heart_3385,Enhancers_Heart_3391,Enhancers_Heart_37004,Enhancers_Heart_37005,Enhancers_Heart_39509,Enhancers_Heart_39969,Enhancers_Heart_41012,Enhancers_Heart_41047,Enhancers_Heart_42152,Enhancers_Heart_42158,Enhancers_Heart_42159,Enhancers_Heart_42160,Enhancers_Heart_42161,Enhancers_Heart_42163,Enhan…
												Enhancers_Heart_10907,Enhancers_Heart_10909,Enhancers_Heart_10910,Enhancers_Heart_10929,Enhancers_Heart_10930,Enhancers_Heart_10931,Enhancers_Heart_16620,Enhancers_Heart_1967,Enhancers_Heart_20479,Enhancers_Heart_24673,Enhancers_Heart_24840,Enhancers_Heart_24891,Enhancers_Heart_26195,Enhancers_Heart_26212,Enhancers_Heart_26213,Enhancers_Heart_26227,Enhancers_Heart_26239,Enhancers_Heart_26247,Enha…
												Enhancers_Heart_11001,Enhancers_Heart_1171,Enhancers_Heart_1249,Enhancers_Heart_12622,Enhancers_Heart_12623,Enhancers_Heart_1274,Enhancers_Heart_14618,Enhancers_Heart_14686,Enhancers_Heart_15623,Enhancers_Heart_17084,Enhancers_Heart_18606,Enhancers_Heart_18979,Enhancers_Heart_19404,Enhancers_Heart_19406,Enhancers_Heart_19432,Enhancers_Heart_19434,Enhancers_Heart_19438,Enhancers_Heart_19874,Enhanc…
												Enhancers_Heart_10907,Enhancers_Heart_10909,Enhancers_Heart_10910,Enhancers_Heart_10929,Enhancers_Heart_10930,Enhancers_Heart_10931,Enhancers_Heart_19615,Enhancers_Heart_19616,Enhancers_Heart_19978,Enhancers_Heart_19980,Enhancers_Heart_19984,Enhancers_Heart_19985,Enhancers_Heart_19996,Enhancers_Heart_19997,Enhancers_Heart_20007,Enhancers_Heart_20013,Enhancers_Heart_20015,Enhancers_Heart_20023,Enh…
												Enhancers_Heart_10907,Enhancers_Heart_10909,Enhancers_Heart_10910,Enhancers_Heart_10929,Enhancers_Heart_10930,Enhancers_Heart_10931,Enhancers_Heart_16324,Enhancers_Heart_17274,Enhancers_Heart_19615,Enhancers_Heart_19616,Enhancers_Heart_19874,Enhancers_Heart_19882,Enhancers_Heart_19889,Enhancers_Heart_19978,Enhancers_Heart_19980,Enhancers_Heart_19984,Enhancers_Heart_19985,Enhancers_Heart_19996,Enh…
												Enhancers_Heart_1607,Enhancers_Heart_20705,Enhancers_Heart_26806,Enhancers_Heart_26841,Enhancers_Heart_26856,Enhancers_Heart_26857,Enhancers_Heart_26861,Enhancers_Heart_26886,Enhancers_Heart_26888,Enhancers_Heart_26889,Enhancers_Heart_26893,Enhancers_Heart_26897,Enhancers_Heart_26899,Enhancers_Heart_3548,Enhancers_Heart_3549,Enhancers_Heart_3550,Enhancers_Heart_36334,Enhancers_Heart_36563,Enhance…
												Enhancers_Heart_10829,Enhancers_Heart_10833,Enhancers_Heart_12078,Enhancers_Heart_17154,Enhancers_Heart_22603,Enhancers_Heart_22604,Enhancers_Heart_22615,Enhancers_Heart_22629,Enhancers_Heart_23765,Enhancers_Heart_2660,Enhancers_Heart_26761,Enhancers_Heart_26763,Enhancers_Heart_26764,Enhancers_Heart_26765,Enhancers_Heart_26766,Enhancers_Heart_26769,Enhancers_Heart_26806,Enhancers_Heart_26841,Enha…
												Enhancers_Heart_14640,Enhancers_Heart_14641,Enhancers_Heart_14643,Enhancers_Heart_14655,Enhancers_Heart_14919,Enhancers_Heart_21078,Enhancers_Heart_21108,Enhancers_Heart_21114,Enhancers_Heart_21123,Enhancers_Heart_21125,Enhancers_Heart_21141,Enhancers_Heart_22066,Enhancers_Heart_22069,Enhancers_Heart_22072,Enhancers_Heart_22073,Enhancers_Heart_22074,Enhancers_Heart_22091,Enhancers_Heart_29061,Enh…
												Enhancers_Heart_22200,Enhancers_Heart_41012,Enhancers_Heart_41047,Enhancers_Heart_46416,Enhancers_Heart_46417,Enhancers_Heart_46421,Enhancers_Heart_46427,Enhancers_Heart_46428,Enhancers_Heart_46432,Enhancers_Heart_46436,Enhancers_Heart_46457,Enhancers_Heart_46458,Enhancers_Heart_46460,Enhancers_Heart_68017,Enhancers_Heart_68019,Enhancers_Heart_87298
												Enhancers_Heart_10078,Enhancers_Heart_10108,Enhancers_Heart_10949,Enhancers_Heart_12372,Enhancers_Heart_13290,Enhancers_Heart_13529,Enhancers_Heart_13532,Enhancers_Heart_13533,Enhancers_Heart_13552,Enhancers_Heart_13557,Enhancers_Heart_14919,Enhancers_Heart_15623,Enhancers_Heart_15813,Enhancers_Heart_1607,Enhancers_Heart_16324,Enhancers_Heart_16438,Enhancers_Heart_17274,Enhancers_Heart_18039,Enha…
												Enhancers_Heart_12078,Enhancers_Heart_14990,Enhancers_Heart_15169,Enhancers_Heart_15590,Enhancers_Heart_16361,Enhancers_Heart_18039,Enhancers_Heart_18045,Enhancers_Heart_18046,Enhancers_Heart_18049,Enhancers_Heart_18057,Enhancers_Heart_18058,Enhancers_Heart_19874,Enhancers_Heart_19882,Enhancers_Heart_19889,Enhancers_Heart_20060,Enhancers_Heart_20064,Enhancers_Heart_20085,Enhancers_Heart_20111,Enh…
												Enhancers_Heart_22111,Enhancers_Heart_22115,Enhancers_Heart_22118,Enhancers_Heart_29155,Enhancers_Heart_29158,Enhancers_Heart_29161,Enhancers_Heart_31270,Enhancers_Heart_31271,Enhancers_Heart_31272,Enhancers_Heart_47230,Enhancers_Heart_53870,Enhancers_Heart_56735,Enhancers_Heart_6563,Enhancers_Heart_6575,Enhancers_Heart_6582,Enhancers_Heart_6585,Enhancers_Heart_80718,Enhancers_Heart_80719,Enhance…
												Enhancers_Heart_26195,Enhancers_Heart_26212,Enhancers_Heart_26213,Enhancers_Heart_26227,Enhancers_Heart_26239,Enhancers_Heart_26247,Enhancers_Heart_26248,Enhancers_Heart_29581,Enhancers_Heart_29948,Enhancers_Heart_29958,Enhancers_Heart_59270,Enhancers_Heart_59274,Enhancers_Heart_59275,Enhancers_Heart_62436,Enhancers_Heart_62444,Enhancers_Heart_62463,Enhancers_Heart_68289,Enhancers_Heart_77259,Enh…
												Enhancers_Heart_11001,Enhancers_Heart_1171,Enhancers_Heart_1249,Enhancers_Heart_1274,Enhancers_Heart_14618,Enhancers_Heart_14686,Enhancers_Heart_17084,Enhancers_Heart_18606,Enhancers_Heart_18979,Enhancers_Heart_19874,Enhancers_Heart_19882,Enhancers_Heart_19889,Enhancers_Heart_20183,Enhancers_Heart_20204,Enhancers_Heart_21442,Enhancers_Heart_21443,Enhancers_Heart_22502,Enhancers_Heart_22546,Enhanc…
												Enhancers_Heart_26195,Enhancers_Heart_26212,Enhancers_Heart_26213,Enhancers_Heart_26227,Enhancers_Heart_26239,Enhancers_Heart_26247,Enhancers_Heart_26248,Enhancers_Heart_45986,Enhancers_Heart_45991,Enhancers_Heart_45994,Enhancers_Heart_46013,Enhancers_Heart_62327,Enhancers_Heart_93500,Enhancers_Heart_93525,Enhancers_Heart_93548,Enhancers_Heart_93564,Enhancers_Heart_93579
												Enhancers_Heart_10907,Enhancers_Heart_10909,Enhancers_Heart_10910,Enhancers_Heart_10929,Enhancers_Heart_10930,Enhancers_Heart_10931,Enhancers_Heart_12078,Enhancers_Heart_12354,Enhancers_Heart_14919,Enhancers_Heart_17696,Enhancers_Heart_1967,Enhancers_Heart_19882,Enhancers_Heart_19889,Enhancers_Heart_21078,Enhancers_Heart_21108,Enhancers_Heart_21114,Enhancers_Heart_21123,Enhancers_Heart_21125,Enha…
												Enhancers_Heart_10907,Enhancers_Heart_10909,Enhancers_Heart_10910,Enhancers_Heart_10929,Enhancers_Heart_10930,Enhancers_Heart_10931,Enhancers_Heart_12078,Enhancers_Heart_14919,Enhancers_Heart_17696,Enhancers_Heart_1967,Enhancers_Heart_19882,Enhancers_Heart_19889,Enhancers_Heart_21078,Enhancers_Heart_21108,Enhancers_Heart_21114,Enhancers_Heart_21123,Enhancers_Heart_21125,Enhancers_Heart_21141,Enha…
												Enhancers_Heart_13529,Enhancers_Heart_13532,Enhancers_Heart_13533,Enhancers_Heart_13552,Enhancers_Heart_13557,Enhancers_Heart_15623,Enhancers_Heart_1607,Enhancers_Heart_16438,Enhancers_Heart_22111,Enhancers_Heart_22115,Enhancers_Heart_22118,Enhancers_Heart_22378,Enhancers_Heart_22380,Enhancers_Heart_22381,Enhancers_Heart_22920,Enhancers_Heart_24673,Enhancers_Heart_26195,Enhancers_Heart_26212,Enha…
												Enhancers_Heart_10208,Enhancers_Heart_10572,Enhancers_Heart_10829,Enhancers_Heart_10833,Enhancers_Heart_11640,Enhancers_Heart_11641,Enhancers_Heart_12078,Enhancers_Heart_12593,Enhancers_Heart_12615,Enhancers_Heart_13195,Enhancers_Heart_13202,Enhancers_Heart_14294,Enhancers_Heart_14311,Enhancers_Heart_14686,Enhancers_Heart_16896,Enhancers_Heart_16911,Enhancers_Heart_17154,Enhancers_Heart_19615,Enh…
												Enhancers_Heart_10907,Enhancers_Heart_10909,Enhancers_Heart_10910,Enhancers_Heart_10929,Enhancers_Heart_10930,Enhancers_Heart_10931,Enhancers_Heart_12078,Enhancers_Heart_12093,Enhancers_Heart_13168,Enhancers_Heart_15623,Enhancers_Heart_22185,Enhancers_Heart_22200,Enhancers_Heart_2407,Enhancers_Heart_2411,Enhancers_Heart_2418,Enhancers_Heart_2423,Enhancers_Heart_2576,Enhancers_Heart_25789,Enhancer…
												Enhancers_Heart_10907,Enhancers_Heart_10909,Enhancers_Heart_10910,Enhancers_Heart_10929,Enhancers_Heart_10930,Enhancers_Heart_10931,Enhancers_Heart_12078,Enhancers_Heart_12372,Enhancers_Heart_1319,Enhancers_Heart_1324,Enhancers_Heart_1327,Enhancers_Heart_14213,Enhancers_Heart_14919,Enhancers_Heart_1607,Enhancers_Heart_20880,Enhancers_Heart_20881,Enhancers_Heart_20882,Enhancers_Heart_20906,Enhance…
												Enhancers_Heart_10078,Enhancers_Heart_10108,Enhancers_Heart_10698,Enhancers_Heart_10710,Enhancers_Heart_10729,Enhancers_Heart_10829,Enhancers_Heart_10833,Enhancers_Heart_10864,Enhancers_Heart_10865,Enhancers_Heart_10907,Enhancers_Heart_10909,Enhancers_Heart_10910,Enhancers_Heart_10929,Enhancers_Heart_10930,Enhancers_Heart_10931,Enhancers_Heart_10948,Enhancers_Heart_11299,Enhancers_Heart_12078,Enh…
												Enhancers_Heart_10208,Enhancers_Heart_1078,Enhancers_Heart_10829,Enhancers_Heart_10833,Enhancers_Heart_1087,Enhancers_Heart_11299,Enhancers_Heart_12127,Enhancers_Heart_12333,Enhancers_Heart_13455,Enhancers_Heart_13464,Enhancers_Heart_13490,Enhancers_Heart_13495,Enhancers_Heart_13666,Enhancers_Heart_15169,Enhancers_Heart_16074,Enhancers_Heart_16108,Enhancers_Heart_16176,Enhancers_Heart_19608,Enhan…
												Enhancers_Heart_22111,Enhancers_Heart_22115,Enhancers_Heart_22118,Enhancers_Heart_23765,Enhancers_Heart_45873,Enhancers_Heart_45901,Enhancers_Heart_6563,Enhancers_Heart_6575,Enhancers_Heart_6582,Enhancers_Heart_6585,Enhancers_Heart_7167,Enhancers_Heart_7169,Enhancers_Heart_7170,Enhancers_Heart_7173,Enhancers_Heart_7174,Enhancers_Heart_7207,Enhancers_Heart_7208,Enhancers_Heart_97246
												Enhancers_Heart_15211,Enhancers_Heart_16324,Enhancers_Heart_19978,Enhancers_Heart_19980,Enhancers_Heart_19984,Enhancers_Heart_19985,Enhancers_Heart_19996,Enhancers_Heart_19997,Enhancers_Heart_20007,Enhancers_Heart_20013,Enhancers_Heart_20015,Enhancers_Heart_20023,Enhancers_Heart_20048,Enhancers_Heart_29061,Enhancers_Heart_29065,Enhancers_Heart_29084,Enhancers_Heart_29220,Enhancers_Heart_29243,Enh…
												Enhancers_Heart_10208,Enhancers_Heart_10572,Enhancers_Heart_12127,Enhancers_Heart_12354,Enhancers_Heart_14919,Enhancers_Heart_16438,Enhancers_Heart_17274,Enhancers_Heart_20405,Enhancers_Heart_21078,Enhancers_Heart_21108,Enhancers_Heart_21114,Enhancers_Heart_21123,Enhancers_Heart_21125,Enhancers_Heart_21141,Enhancers_Heart_21390,Enhancers_Heart_21402,Enhancers_Heart_22603,Enhancers_Heart_22604,Enh…
												Enhancers_Heart_13529,Enhancers_Heart_13532,Enhancers_Heart_13533,Enhancers_Heart_13552,Enhancers_Heart_13557,Enhancers_Heart_1607,Enhancers_Heart_16438,Enhancers_Heart_22111,Enhancers_Heart_22115,Enhancers_Heart_22118,Enhancers_Heart_22378,Enhancers_Heart_22380,Enhancers_Heart_22381,Enhancers_Heart_22920,Enhancers_Heart_30498,Enhancers_Heart_30499,Enhancers_Heart_30501,Enhancers_Heart_35291,Enha…
												Enhancers_Heart_12372,Enhancers_Heart_1319,Enhancers_Heart_1324,Enhancers_Heart_1327,Enhancers_Heart_14213,Enhancers_Heart_14686,Enhancers_Heart_15382,Enhancers_Heart_16761,Enhancers_Heart_16764,Enhancers_Heart_20880,Enhancers_Heart_20881,Enhancers_Heart_20882,Enhancers_Heart_20906,Enhancers_Heart_20908,Enhancers_Heart_20937,Enhancers_Heart_20974,Enhancers_Heart_21915,Enhancers_Heart_24891,Enhanc…
												Enhancers_Heart_10219,Enhancers_Heart_10948,Enhancers_Heart_11533,Enhancers_Heart_11534,Enhancers_Heart_11547,Enhancers_Heart_11551,Enhancers_Heart_11691,Enhancers_Heart_11692,Enhancers_Heart_11696,Enhancers_Heart_11698,Enhancers_Heart_11699,Enhancers_Heart_11717,Enhancers_Heart_12078,Enhancers_Heart_13424,Enhancers_Heart_13431,Enhancers_Heart_14365,Enhancers_Heart_14990,Enhancers_Heart_15382,Enh…
												Enhancers_Heart_10948,Enhancers_Heart_11640,Enhancers_Heart_11641,Enhancers_Heart_12372,Enhancers_Heart_14990,Enhancers_Heart_17028,Enhancers_Heart_18367,Enhancers_Heart_19404,Enhancers_Heart_19406,Enhancers_Heart_19432,Enhancers_Heart_19434,Enhancers_Heart_19438,Enhancers_Heart_21915,Enhancers_Heart_2264,Enhancers_Heart_2274,Enhancers_Heart_2294,Enhancers_Heart_2300,Enhancers_Heart_2301,Enhancer…
												Enhancers_Heart_10108,Enhancers_Heart_11001,Enhancers_Heart_13075,Enhancers_Heart_13080,Enhancers_Heart_14474,Enhancers_Heart_15623,Enhancers_Heart_15787,Enhancers_Heart_16176,Enhancers_Heart_16240,Enhancers_Heart_16245,Enhancers_Heart_16247,Enhancers_Heart_16254,Enhancers_Heart_16256,Enhancers_Heart_17028,Enhancers_Heart_17134,Enhancers_Heart_17274,Enhancers_Heart_18073,Enhancers_Heart_18979,Enh…
												Enhancers_Heart_10907,Enhancers_Heart_10909,Enhancers_Heart_10910,Enhancers_Heart_10929,Enhancers_Heart_10930,Enhancers_Heart_10931,Enhancers_Heart_16620,Enhancers_Heart_1967,Enhancers_Heart_20479,Enhancers_Heart_24673,Enhancers_Heart_24840,Enhancers_Heart_24891,Enhancers_Heart_26195,Enhancers_Heart_26212,Enhancers_Heart_26213,Enhancers_Heart_26227,Enhancers_Heart_26239,Enhancers_Heart_26247,Enha…
												Enhancers_Heart_10907,Enhancers_Heart_10909,Enhancers_Heart_10910,Enhancers_Heart_10929,Enhancers_Heart_10930,Enhancers_Heart_10931,Enhancers_Heart_12078,Enhancers_Heart_12093,Enhancers_Heart_15623,Enhancers_Heart_22185,Enhancers_Heart_22200,Enhancers_Heart_2407,Enhancers_Heart_2411,Enhancers_Heart_2418,Enhancers_Heart_2423,Enhancers_Heart_49167,Enhancers_Heart_49168,Enhancers_Heart_69867,Enhance…
												Enhancers_Heart_10907,Enhancers_Heart_10909,Enhancers_Heart_10910,Enhancers_Heart_10929,Enhancers_Heart_10930,Enhancers_Heart_10931,Enhancers_Heart_11533,Enhancers_Heart_11534,Enhancers_Heart_11547,Enhancers_Heart_11551,Enhancers_Heart_18073,Enhancers_Heart_21078,Enhancers_Heart_21108,Enhancers_Heart_21114,Enhancers_Heart_21123,Enhancers_Heart_21125,Enhancers_Heart_21141,Enhancers_Heart_26153,Enh…
												Enhancers_Heart_10907,Enhancers_Heart_10909,Enhancers_Heart_10910,Enhancers_Heart_10929,Enhancers_Heart_10930,Enhancers_Heart_10931,Enhancers_Heart_12078,Enhancers_Heart_12093,Enhancers_Heart_13168,Enhancers_Heart_15623,Enhancers_Heart_22185,Enhancers_Heart_22200,Enhancers_Heart_2407,Enhancers_Heart_2411,Enhancers_Heart_2418,Enhancers_Heart_2423,Enhancers_Heart_2576,Enhancers_Heart_33033,Enhancer…
												Enhancers_Heart_2149,Enhancers_Heart_2150,Enhancers_Heart_2151,Enhancers_Heart_24673,Enhancers_Heart_29220,Enhancers_Heart_29243,Enhancers_Heart_29252,Enhancers_Heart_32952,Enhancers_Heart_33114,Enhancers_Heart_33116,Enhancers_Heart_40976,Enhancers_Heart_40978,Enhancers_Heart_40979,Enhancers_Heart_40980,Enhancers_Heart_40981,Enhancers_Heart_40983,Enhancers_Heart_40984,Enhancers_Heart_46213,Enhanc…
												Enhancers_Heart_2407,Enhancers_Heart_2411,Enhancers_Heart_2418,Enhancers_Heart_2423,Enhancers_Heart_30210,Enhancers_Heart_38371,Enhancers_Heart_38380,Enhancers_Heart_38388,Enhancers_Heart_38404,Enhancers_Heart_38421,Enhancers_Heart_51061,Enhancers_Heart_51062,Enhancers_Heart_53641,Enhancers_Heart_53937,Enhancers_Heart_56735,Enhancers_Heart_58078,Enhancers_Heart_61629,Enhancers_Heart_61649,Enhance…
												Enhancers_Heart_13424,Enhancers_Heart_13431,Enhancers_Heart_13455,Enhancers_Heart_13464,Enhancers_Heart_15623,Enhancers_Heart_16620,Enhancers_Heart_17134,Enhancers_Heart_19404,Enhancers_Heart_19406,Enhancers_Heart_19432,Enhancers_Heart_19434,Enhancers_Heart_19438,Enhancers_Heart_20060,Enhancers_Heart_20064,Enhancers_Heart_20085,Enhancers_Heart_21308,Enhancers_Heart_3639,Enhancers_Heart_3640,Enhan…
												Enhancers_Heart_10948,Enhancers_Heart_11640,Enhancers_Heart_11641,Enhancers_Heart_14990,Enhancers_Heart_17028,Enhancers_Heart_18367,Enhancers_Heart_19404,Enhancers_Heart_19406,Enhancers_Heart_19432,Enhancers_Heart_19434,Enhancers_Heart_19438,Enhancers_Heart_21915,Enhancers_Heart_2264,Enhancers_Heart_2274,Enhancers_Heart_2294,Enhancers_Heart_2300,Enhancers_Heart_2301,Enhancers_Heart_2306,Enhancers…
												Enhancers_Heart_12127,Enhancers_Heart_45131,Enhancers_Heart_45138,Enhancers_Heart_45147,Enhancers_Heart_45159,Enhancers_Heart_45181,Enhancers_Heart_46985,Enhancers_Heart_52226,Enhancers_Heart_54399,Enhancers_Heart_5682,Enhancers_Heart_5683,Enhancers_Heart_5695,Enhancers_Heart_5698,Enhancers_Heart_58305,Enhancers_Heart_58308,Enhancers_Heart_58309,Enhancers_Heart_58310,Enhancers_Heart_81906,Enhance…
												Enhancers_Heart_10219,Enhancers_Heart_10948,Enhancers_Heart_11533,Enhancers_Heart_11534,Enhancers_Heart_11547,Enhancers_Heart_11551,Enhancers_Heart_11691,Enhancers_Heart_11692,Enhancers_Heart_11696,Enhancers_Heart_11698,Enhancers_Heart_11699,Enhancers_Heart_11717,Enhancers_Heart_12078,Enhancers_Heart_13424,Enhancers_Heart_13431,Enhancers_Heart_14365,Enhancers_Heart_14990,Enhancers_Heart_15382,Enh…
												Enhancers_Heart_28695,Enhancers_Heart_28697,Enhancers_Heart_28698,Enhancers_Heart_29061,Enhancers_Heart_29065,Enhancers_Heart_29084,Enhancers_Heart_29220,Enhancers_Heart_29243,Enhancers_Heart_29252,Enhancers_Heart_39682,Enhancers_Heart_39696,Enhancers_Heart_39698,Enhancers_Heart_46317,Enhancers_Heart_46318,Enhancers_Heart_46323,Enhancers_Heart_48739,Enhancers_Heart_48753,Enhancers_Heart_52589,Enh…
												Enhancers_Heart_19978,Enhancers_Heart_19980,Enhancers_Heart_19984,Enhancers_Heart_19985,Enhancers_Heart_19996,Enhancers_Heart_19997,Enhancers_Heart_20007,Enhancers_Heart_20013,Enhancers_Heart_20015,Enhancers_Heart_20023,Enhancers_Heart_20048,Enhancers_Heart_27202,Enhancers_Heart_27205,Enhancers_Heart_33738,Enhancers_Heart_41012,Enhancers_Heart_41047,Enhancers_Heart_43462,Enhancers_Heart_43471,Enh…
												Enhancers_Heart_10174,Enhancers_Heart_1078,Enhancers_Heart_10829,Enhancers_Heart_10833,Enhancers_Heart_1087,Enhancers_Heart_11299,Enhancers_Heart_12127,Enhancers_Heart_12333,Enhancers_Heart_12593,Enhancers_Heart_12615,Enhancers_Heart_13455,Enhancers_Heart_13464,Enhancers_Heart_13490,Enhancers_Heart_13495,Enhancers_Heart_13666,Enhancers_Heart_14640,Enhancers_Heart_14641,Enhancers_Heart_14643,Enhan…
												Enhancers_Heart_14474,Enhancers_Heart_16324,Enhancers_Heart_21078,Enhancers_Heart_21108,Enhancers_Heart_21114,Enhancers_Heart_21123,Enhancers_Heart_21125,Enhancers_Heart_21141,Enhancers_Heart_21915,Enhancers_Heart_26195,Enhancers_Heart_26212,Enhancers_Heart_26213,Enhancers_Heart_26227,Enhancers_Heart_26239,Enhancers_Heart_26247,Enhancers_Heart_26248,Enhancers_Heart_28695,Enhancers_Heart_28697,Enh…
												Enhancers_Heart_2407,Enhancers_Heart_2411,Enhancers_Heart_2418,Enhancers_Heart_2423,Enhancers_Heart_30210,Enhancers_Heart_38371,Enhancers_Heart_38380,Enhancers_Heart_38388,Enhancers_Heart_38404,Enhancers_Heart_38421,Enhancers_Heart_51061,Enhancers_Heart_51062,Enhancers_Heart_53641,Enhancers_Heart_53937,Enhancers_Heart_56735,Enhancers_Heart_61629,Enhancers_Heart_61649,Enhancers_Heart_61650,Enhance…
												Enhancers_Heart_11001,Enhancers_Heart_11533,Enhancers_Heart_11534,Enhancers_Heart_11547,Enhancers_Heart_11551,Enhancers_Heart_14990,Enhancers_Heart_15623,Enhancers_Heart_17084,Enhancers_Heart_19404,Enhancers_Heart_19406,Enhancers_Heart_19432,Enhancers_Heart_19434,Enhancers_Heart_19438,Enhancers_Heart_19978,Enhancers_Heart_19980,Enhancers_Heart_19984,Enhancers_Heart_19985,Enhancers_Heart_19996,Enh…
												Enhancers_Heart_10078,Enhancers_Heart_10907,Enhancers_Heart_10909,Enhancers_Heart_10910,Enhancers_Heart_10929,Enhancers_Heart_10930,Enhancers_Heart_10931,Enhancers_Heart_11640,Enhancers_Heart_11641,Enhancers_Heart_13255,Enhancers_Heart_13265,Enhancers_Heart_14919,Enhancers_Heart_15851,Enhancers_Heart_16884,Enhancers_Heart_16885,Enhancers_Heart_17154,Enhancers_Heart_18651,Enhancers_Heart_19874,Enh…
												Enhancers_Heart_10078,Enhancers_Heart_10907,Enhancers_Heart_10909,Enhancers_Heart_10910,Enhancers_Heart_10929,Enhancers_Heart_10930,Enhancers_Heart_10931,Enhancers_Heart_11640,Enhancers_Heart_11641,Enhancers_Heart_13255,Enhancers_Heart_13265,Enhancers_Heart_14919,Enhancers_Heart_15851,Enhancers_Heart_16884,Enhancers_Heart_16885,Enhancers_Heart_17154,Enhancers_Heart_18651,Enhancers_Heart_19874,Enh…
												Enhancers_Heart_10907,Enhancers_Heart_10909,Enhancers_Heart_10910,Enhancers_Heart_10929,Enhancers_Heart_10930,Enhancers_Heart_10931,Enhancers_Heart_11001,Enhancers_Heart_11533,Enhancers_Heart_11534,Enhancers_Heart_11547,Enhancers_Heart_11551,Enhancers_Heart_14990,Enhancers_Heart_15046,Enhancers_Heart_15048,Enhancers_Heart_15049,Enhancers_Heart_15055,Enhancers_Heart_15056,Enhancers_Heart_15623,Enh…
												Enhancers_Heart_10078,Enhancers_Heart_10108,Enhancers_Heart_15729,Enhancers_Heart_15730,Enhancers_Heart_32896,Enhancers_Heart_32901,Enhancers_Heart_32931,Enhancers_Heart_32932,Enhancers_Heart_32952,Enhancers_Heart_41012,Enhancers_Heart_41047,Enhancers_Heart_45131,Enhancers_Heart_45138,Enhancers_Heart_45147,Enhancers_Heart_45159,Enhancers_Heart_45181,Enhancers_Heart_48296,Enhancers_Heart_53829,Enh…
												Enhancers_Heart_13666,Enhancers_Heart_13676,Enhancers_Heart_13684,Enhancers_Heart_18073,Enhancers_Heart_26195,Enhancers_Heart_26212,Enhancers_Heart_26213,Enhancers_Heart_26227,Enhancers_Heart_26239,Enhancers_Heart_26247,Enhancers_Heart_26248,Enhancers_Heart_29061,Enhancers_Heart_29065,Enhancers_Heart_29084,Enhancers_Heart_29220,Enhancers_Heart_29243,Enhancers_Heart_29252,Enhancers_Heart_29948,Enh…
												Enhancers_Heart_13666,Enhancers_Heart_13676,Enhancers_Heart_13684,Enhancers_Heart_29061,Enhancers_Heart_29065,Enhancers_Heart_29084,Enhancers_Heart_29948,Enhancers_Heart_29958,Enhancers_Heart_32815,Enhancers_Heart_32844,Enhancers_Heart_32850,Enhancers_Heart_32851,Enhancers_Heart_32852,Enhancers_Heart_32853,Enhancers_Heart_32854,Enhancers_Heart_32866,Enhancers_Heart_52589,Enhancers_Heart_55627,Enh…
												Enhancers_Heart_10907,Enhancers_Heart_10909,Enhancers_Heart_10910,Enhancers_Heart_10929,Enhancers_Heart_10930,Enhancers_Heart_10931,Enhancers_Heart_14919,Enhancers_Heart_20479,Enhancers_Heart_24673,Enhancers_Heart_29948,Enhancers_Heart_29958,Enhancers_Heart_30228,Enhancers_Heart_30232,Enhancers_Heart_30235,Enhancers_Heart_30243,Enhancers_Heart_34853,Enhancers_Heart_34882,Enhancers_Heart_34883,Enh…
												Enhancers_Heart_12078,Enhancers_Heart_14990,Enhancers_Heart_15169,Enhancers_Heart_16361,Enhancers_Heart_20479,Enhancers_Heart_22502,Enhancers_Heart_22546,Enhancers_Heart_22551,Enhancers_Heart_22561,Enhancers_Heart_22569,Enhancers_Heart_24673,Enhancers_Heart_25124,Enhancers_Heart_25126,Enhancers_Heart_25127,Enhancers_Heart_25663,Enhancers_Heart_26071,Enhancers_Heart_26072,Enhancers_Heart_26083,Enh…
												Enhancers_Heart_10907,Enhancers_Heart_10909,Enhancers_Heart_10910,Enhancers_Heart_10929,Enhancers_Heart_10930,Enhancers_Heart_10931,Enhancers_Heart_12078,Enhancers_Heart_12093,Enhancers_Heart_13168,Enhancers_Heart_15623,Enhancers_Heart_22185,Enhancers_Heart_22200,Enhancers_Heart_2407,Enhancers_Heart_2411,Enhancers_Heart_2418,Enhancers_Heart_2423,Enhancers_Heart_2576,Enhancers_Heart_33033,Enhancer…
												Enhancers_Heart_10078,Enhancers_Heart_10208,Enhancers_Heart_10219,Enhancers_Heart_104,Enhancers_Heart_10829,Enhancers_Heart_10833,Enhancers_Heart_10907,Enhancers_Heart_10909,Enhancers_Heart_10910,Enhancers_Heart_10929,Enhancers_Heart_10930,Enhancers_Heart_10931,Enhancers_Heart_12078,Enhancers_Heart_12127,Enhancers_Heart_12354,Enhancers_Heart_12593,Enhancers_Heart_12615,Enhancers_Heart_129,Enhance…
												Enhancers_Heart_29581,Enhancers_Heart_30228,Enhancers_Heart_30232,Enhancers_Heart_30235,Enhancers_Heart_30243,Enhancers_Heart_53519,Enhancers_Heart_53524,Enhancers_Heart_53536,Enhancers_Heart_63174,Enhancers_Heart_77259,Enhancers_Heart_77260,Enhancers_Heart_77261,Enhancers_Heart_87335,Enhancers_Heart_87339,Enhancers_Heart_87349,Enhancers_Heart_9234,Enhancers_Heart_9243,Enhancers_Heart_9246,Enhanc…
												Enhancers_Heart_20705,Enhancers_Heart_26806,Enhancers_Heart_26841,Enhancers_Heart_26856,Enhancers_Heart_26857,Enhancers_Heart_26861,Enhancers_Heart_26886,Enhancers_Heart_26888,Enhancers_Heart_26889,Enhancers_Heart_26893,Enhancers_Heart_26897,Enhancers_Heart_26899,Enhancers_Heart_44272,Enhancers_Heart_44278,Enhancers_Heart_44283,Enhancers_Heart_44328,Enhancers_Heart_731
												Enhancers_Heart_10174,Enhancers_Heart_10208,Enhancers_Heart_1078,Enhancers_Heart_10829,Enhancers_Heart_10833,Enhancers_Heart_1087,Enhancers_Heart_11299,Enhancers_Heart_12127,Enhancers_Heart_12333,Enhancers_Heart_13455,Enhancers_Heart_13464,Enhancers_Heart_13490,Enhancers_Heart_13495,Enhancers_Heart_13666,Enhancers_Heart_15169,Enhancers_Heart_16074,Enhancers_Heart_16108,Enhancers_Heart_16176,Enhan…
												Enhancers_Heart_10907,Enhancers_Heart_10909,Enhancers_Heart_10910,Enhancers_Heart_10929,Enhancers_Heart_10930,Enhancers_Heart_10931,Enhancers_Heart_12354,Enhancers_Heart_12372,Enhancers_Heart_14919,Enhancers_Heart_1967,Enhancers_Heart_20291,Enhancers_Heart_20305,Enhancers_Heart_2306,Enhancers_Heart_2307,Enhancers_Heart_2309,Enhancers_Heart_2310,Enhancers_Heart_23391,Enhancers_Heart_26195,Enhancer…
												Enhancers_Heart_18,Enhancers_Heart_27884,Enhancers_Heart_27886,Enhancers_Heart_27887,Enhancers_Heart_27895,Enhancers_Heart_27899,Enhancers_Heart_27923,Enhancers_Heart_27925,Enhancers_Heart_27935,Enhancers_Heart_27941,Enhancers_Heart_27942,Enhancers_Heart_27943,Enhancers_Heart_27950,Enhancers_Heart_27951,Enhancers_Heart_27960,Enhancers_Heart_27965,Enhancers_Heart_47423,Enhancers_Heart_48044,Enhanc…
												Enhancers_Heart_10572,Enhancers_Heart_10829,Enhancers_Heart_10833,Enhancers_Heart_10864,Enhancers_Heart_10865,Enhancers_Heart_10907,Enhancers_Heart_10909,Enhancers_Heart_10910,Enhancers_Heart_10929,Enhancers_Heart_10930,Enhancers_Heart_10931,Enhancers_Heart_11563,Enhancers_Heart_11573,Enhancers_Heart_11609,Enhancers_Heart_11612,Enhancers_Heart_11640,Enhancers_Heart_11641,Enhancers_Heart_11906,Enh…
												Enhancers_Heart_10219,Enhancers_Heart_10948,Enhancers_Heart_11533,Enhancers_Heart_11534,Enhancers_Heart_11547,Enhancers_Heart_11551,Enhancers_Heart_11691,Enhancers_Heart_11692,Enhancers_Heart_11696,Enhancers_Heart_11698,Enhancers_Heart_11699,Enhancers_Heart_11717,Enhancers_Heart_12078,Enhancers_Heart_13424,Enhancers_Heart_13431,Enhancers_Heart_14365,Enhancers_Heart_14990,Enhancers_Heart_15382,Enh…
												Enhancers_Heart_10219,Enhancers_Heart_10948,Enhancers_Heart_1134,Enhancers_Heart_11533,Enhancers_Heart_11534,Enhancers_Heart_11547,Enhancers_Heart_11551,Enhancers_Heart_11691,Enhancers_Heart_11692,Enhancers_Heart_11696,Enhancers_Heart_11698,Enhancers_Heart_11699,Enhancers_Heart_11717,Enhancers_Heart_12078,Enhancers_Heart_13424,Enhancers_Heart_13431,Enhancers_Heart_14365,Enhancers_Heart_14990,Enha…
												Enhancers_Heart_10907,Enhancers_Heart_10909,Enhancers_Heart_10910,Enhancers_Heart_10929,Enhancers_Heart_10930,Enhancers_Heart_10931,Enhancers_Heart_11001,Enhancers_Heart_1171,Enhancers_Heart_12078,Enhancers_Heart_12405,Enhancers_Heart_1249,Enhancers_Heart_1274,Enhancers_Heart_14311,Enhancers_Heart_14618,Enhancers_Heart_14640,Enhancers_Heart_14641,Enhancers_Heart_14643,Enhancers_Heart_14655,Enhanc…
												Enhancers_Heart_10108,Enhancers_Heart_10907,Enhancers_Heart_10909,Enhancers_Heart_10910,Enhancers_Heart_10929,Enhancers_Heart_10930,Enhancers_Heart_10931,Enhancers_Heart_11533,Enhancers_Heart_11534,Enhancers_Heart_11547,Enhancers_Heart_11551,Enhancers_Heart_18073,Enhancers_Heart_21078,Enhancers_Heart_21108,Enhancers_Heart_21114,Enhancers_Heart_21123,Enhancers_Heart_21125,Enhancers_Heart_21141,Enh…
												Enhancers_Heart_13529,Enhancers_Heart_13532,Enhancers_Heart_13533,Enhancers_Heart_13552,Enhancers_Heart_13557,Enhancers_Heart_15623,Enhancers_Heart_15851,Enhancers_Heart_1607,Enhancers_Heart_16438,Enhancers_Heart_17576,Enhancers_Heart_20705,Enhancers_Heart_21915,Enhancers_Heart_22111,Enhancers_Heart_22115,Enhancers_Heart_22118,Enhancers_Heart_22378,Enhancers_Heart_22380,Enhancers_Heart_22381,Enha…
												Enhancers_Heart_10907,Enhancers_Heart_10909,Enhancers_Heart_10910,Enhancers_Heart_10929,Enhancers_Heart_10930,Enhancers_Heart_10931,Enhancers_Heart_12127,Enhancers_Heart_12372,Enhancers_Heart_13195,Enhancers_Heart_13202,Enhancers_Heart_13255,Enhancers_Heart_13265,Enhancers_Heart_13529,Enhancers_Heart_13532,Enhancers_Heart_13533,Enhancers_Heart_13552,Enhancers_Heart_13557,Enhancers_Heart_15211,Enh…
												Enhancers_Heart_3919,Enhancers_Heart_55188,Enhancers_Heart_76075,Enhancers_Heart_76076,Enhancers_Heart_96369,Enhancers_Heart_96372,Enhancers_Heart_96373,Enhancers_Heart_96376
												Enhancers_Heart_12354,Enhancers_Heart_14640,Enhancers_Heart_14641,Enhancers_Heart_14643,Enhancers_Heart_14655,Enhancers_Heart_20085,Enhancers_Heart_26322,Enhancers_Heart_26323,Enhancers_Heart_29421,Enhancers_Heart_29422,Enhancers_Heart_29423,Enhancers_Heart_29424,Enhancers_Heart_4040,Enhancers_Heart_53455,Enhancers_Heart_55231,Enhancers_Heart_55237,Enhancers_Heart_55268,Enhancers_Heart_55289,Enha…
												Enhancers_Heart_10208,Enhancers_Heart_10572,Enhancers_Heart_11001,Enhancers_Heart_12127,Enhancers_Heart_12354,Enhancers_Heart_13075,Enhancers_Heart_13080,Enhancers_Heart_14474,Enhancers_Heart_14919,Enhancers_Heart_16438,Enhancers_Heart_16948,Enhancers_Heart_16953,Enhancers_Heart_17274,Enhancers_Heart_19404,Enhancers_Heart_19406,Enhancers_Heart_19432,Enhancers_Heart_19434,Enhancers_Heart_19438,Enh…
												Enhancers_Heart_10907,Enhancers_Heart_10909,Enhancers_Heart_10910,Enhancers_Heart_10929,Enhancers_Heart_10930,Enhancers_Heart_10931,Enhancers_Heart_12078,Enhancers_Heart_12093,Enhancers_Heart_15623,Enhancers_Heart_22185,Enhancers_Heart_22200,Enhancers_Heart_2407,Enhancers_Heart_2411,Enhancers_Heart_2418,Enhancers_Heart_2423,Enhancers_Heart_38211,Enhancers_Heart_38212,Enhancers_Heart_38216,Enhance…
												Enhancers_Heart_104,Enhancers_Heart_10572,Enhancers_Heart_12354,Enhancers_Heart_12372,Enhancers_Heart_129,Enhancers_Heart_14466,Enhancers_Heart_14919,Enhancers_Heart_15623,Enhancers_Heart_15851,Enhancers_Heart_16690,Enhancers_Heart_16761,Enhancers_Heart_16764,Enhancers_Heart_16884,Enhancers_Heart_16885,Enhancers_Heart_17154,Enhancers_Heart_17696,Enhancers_Heart_18073,Enhancers_Heart_1877,Enhancer…
												Enhancers_Heart_10078,Enhancers_Heart_12586,Enhancers_Heart_15425,Enhancers_Heart_15430,Enhancers_Heart_15729,Enhancers_Heart_15730,Enhancers_Heart_16324,Enhancers_Heart_18715,Enhancers_Heart_18717,Enhancers_Heart_21776,Enhancers_Heart_22378,Enhancers_Heart_22380,Enhancers_Heart_22381,Enhancers_Heart_24696,Enhancers_Heart_24705,Enhancers_Heart_24706,Enhancers_Heart_24728,Enhancers_Heart_28695,Enh…
												Enhancers_Heart_10174,Enhancers_Heart_10208,Enhancers_Heart_1078,Enhancers_Heart_10829,Enhancers_Heart_10833,Enhancers_Heart_1087,Enhancers_Heart_10907,Enhancers_Heart_10909,Enhancers_Heart_10910,Enhancers_Heart_10929,Enhancers_Heart_10930,Enhancers_Heart_10931,Enhancers_Heart_11299,Enhancers_Heart_12127,Enhancers_Heart_12333,Enhancers_Heart_12593,Enhancers_Heart_12615,Enhancers_Heart_13455,Enhan…
												Enhancers_Heart_10108,Enhancers_Heart_10929,Enhancers_Heart_10930,Enhancers_Heart_10931,Enhancers_Heart_14294,Enhancers_Heart_14618,Enhancers_Heart_15787,Enhancers_Heart_16658,Enhancers_Heart_17154,Enhancers_Heart_17329,Enhancers_Heart_19882,Enhancers_Heart_19889,Enhancers_Heart_20060,Enhancers_Heart_20064,Enhancers_Heart_20085,Enhancers_Heart_25364,Enhancers_Heart_26761,Enhancers_Heart_26763,Enh…
												Enhancers_Heart_10907,Enhancers_Heart_10909,Enhancers_Heart_10910,Enhancers_Heart_10929,Enhancers_Heart_10930,Enhancers_Heart_10931,Enhancers_Heart_12078,Enhancers_Heart_12093,Enhancers_Heart_15623,Enhancers_Heart_22185,Enhancers_Heart_22200,Enhancers_Heart_2407,Enhancers_Heart_2411,Enhancers_Heart_2418,Enhancers_Heart_2423,Enhancers_Heart_33237,Enhancers_Heart_33239,Enhancers_Heart_49167,Enhance…
												Enhancers_Heart_11726,Enhancers_Heart_15211,Enhancers_Heart_19978,Enhancers_Heart_19980,Enhancers_Heart_19984,Enhancers_Heart_19985,Enhancers_Heart_19996,Enhancers_Heart_19997,Enhancers_Heart_20007,Enhancers_Heart_20013,Enhancers_Heart_20015,Enhancers_Heart_20023,Enhancers_Heart_20048,Enhancers_Heart_20204,Enhancers_Heart_20209,Enhancers_Heart_20217,Enhancers_Heart_20228,Enhancers_Heart_20230,Enh…
												Enhancers_Heart_10907,Enhancers_Heart_10909,Enhancers_Heart_10910,Enhancers_Heart_10929,Enhancers_Heart_10930,Enhancers_Heart_10931,Enhancers_Heart_16324,Enhancers_Heart_19615,Enhancers_Heart_19616,Enhancers_Heart_19874,Enhancers_Heart_19882,Enhancers_Heart_19889,Enhancers_Heart_19978,Enhancers_Heart_19980,Enhancers_Heart_19984,Enhancers_Heart_19985,Enhancers_Heart_19996,Enhancers_Heart_19997,Enh…
												Enhancers_Heart_14919,Enhancers_Heart_2306,Enhancers_Heart_2307,Enhancers_Heart_2309,Enhancers_Heart_2310,Enhancers_Heart_26195,Enhancers_Heart_26212,Enhancers_Heart_26213,Enhancers_Heart_26227,Enhancers_Heart_26239,Enhancers_Heart_26247,Enhancers_Heart_26248,Enhancers_Heart_27832,Enhancers_Heart_27833,Enhancers_Heart_27834,Enhancers_Heart_27845,Enhancers_Heart_27846,Enhancers_Heart_27869,Enhance…
												Enhancers_Heart_10907,Enhancers_Heart_10909,Enhancers_Heart_10910,Enhancers_Heart_10929,Enhancers_Heart_10930,Enhancers_Heart_10931,Enhancers_Heart_11640,Enhancers_Heart_11641,Enhancers_Heart_11906,Enhancers_Heart_11910,Enhancers_Heart_12078,Enhancers_Heart_13255,Enhancers_Heart_13265,Enhancers_Heart_16324,Enhancers_Heart_16884,Enhancers_Heart_16885,Enhancers_Heart_17274,Enhancers_Heart_18073,Enh…
												Enhancers_Heart_2149,Enhancers_Heart_2150,Enhancers_Heart_2151,Enhancers_Heart_29220,Enhancers_Heart_29243,Enhancers_Heart_29252,Enhancers_Heart_32952,Enhancers_Heart_33114,Enhancers_Heart_33116,Enhancers_Heart_40976,Enhancers_Heart_40978,Enhancers_Heart_40979,Enhancers_Heart_40980,Enhancers_Heart_40981,Enhancers_Heart_40983,Enhancers_Heart_40984,Enhancers_Heart_46213,Enhancers_Heart_48523,Enhanc…
												Enhancers_Heart_10078,Enhancers_Heart_10108,Enhancers_Heart_104,Enhancers_Heart_10572,Enhancers_Heart_11726,Enhancers_Heart_11906,Enhancers_Heart_11910,Enhancers_Heart_12127,Enhancers_Heart_12593,Enhancers_Heart_12615,Enhancers_Heart_129,Enhancers_Heart_1290,Enhancers_Heart_1294,Enhancers_Heart_13255,Enhancers_Heart_13265,Enhancers_Heart_14474,Enhancers_Heart_15217,Enhancers_Heart_1615,Enhancers_…
												Enhancers_Heart_12078,Enhancers_Heart_14990,Enhancers_Heart_15169,Enhancers_Heart_16361,Enhancers_Heart_20479,Enhancers_Heart_22502,Enhancers_Heart_22546,Enhancers_Heart_22551,Enhancers_Heart_22561,Enhancers_Heart_22569,Enhancers_Heart_24673,Enhancers_Heart_25124,Enhancers_Heart_25126,Enhancers_Heart_25127,Enhancers_Heart_25663,Enhancers_Heart_26071,Enhancers_Heart_26072,Enhancers_Heart_26083,Enh…
												Enhancers_Heart_11001,Enhancers_Heart_1171,Enhancers_Heart_1249,Enhancers_Heart_12622,Enhancers_Heart_12623,Enhancers_Heart_1274,Enhancers_Heart_14311,Enhancers_Heart_14618,Enhancers_Heart_14686,Enhancers_Heart_15623,Enhancers_Heart_17084,Enhancers_Heart_18606,Enhancers_Heart_18704,Enhancers_Heart_18705,Enhancers_Heart_18706,Enhancers_Heart_1877,Enhancers_Heart_18979,Enhancers_Heart_19404,Enhance…
												Enhancers_Heart_14474,Enhancers_Heart_15565,Enhancers_Heart_15570,Enhancers_Heart_15572,Enhancers_Heart_15623,Enhancers_Heart_16236,Enhancers_Heart_16690,Enhancers_Heart_1673,Enhancers_Heart_1677,Enhancers_Heart_1678,Enhancers_Heart_16896,Enhancers_Heart_18331,Enhancers_Heart_18332,Enhancers_Heart_21489,Enhancers_Heart_21545,Enhancers_Heart_21547,Enhancers_Heart_2186,Enhancers_Heart_21915,Enhance…
												Enhancers_Heart_10698,Enhancers_Heart_10710,Enhancers_Heart_10729,Enhancers_Heart_11563,Enhancers_Heart_11573,Enhancers_Heart_11609,Enhancers_Heart_11612,Enhancers_Heart_1171,Enhancers_Heart_11906,Enhancers_Heart_11910,Enhancers_Heart_12078,Enhancers_Heart_12242,Enhancers_Heart_12258,Enhancers_Heart_12333,Enhancers_Heart_12622,Enhancers_Heart_12623,Enhancers_Heart_13424,Enhancers_Heart_13431,Enha…
												Enhancers_Heart_10108,Enhancers_Heart_10829,Enhancers_Heart_10833,Enhancers_Heart_10864,Enhancers_Heart_10865,Enhancers_Heart_10907,Enhancers_Heart_10909,Enhancers_Heart_10910,Enhancers_Heart_10929,Enhancers_Heart_10930,Enhancers_Heart_10931,Enhancers_Heart_12078,Enhancers_Heart_12093,Enhancers_Heart_13424,Enhancers_Heart_13431,Enhancers_Heart_13455,Enhancers_Heart_13464,Enhancers_Heart_14311,Enh…
												Enhancers_Heart_13529,Enhancers_Heart_13532,Enhancers_Heart_13533,Enhancers_Heart_13552,Enhancers_Heart_13557,Enhancers_Heart_15623,Enhancers_Heart_1607,Enhancers_Heart_16438,Enhancers_Heart_22111,Enhancers_Heart_22115,Enhancers_Heart_22118,Enhancers_Heart_22378,Enhancers_Heart_22380,Enhancers_Heart_22381,Enhancers_Heart_22920,Enhancers_Heart_26806,Enhancers_Heart_26841,Enhancers_Heart_26856,Enha…
												Enhancers_Heart_10572,Enhancers_Heart_11726,Enhancers_Heart_12372,Enhancers_Heart_12593,Enhancers_Heart_12615,Enhancers_Heart_13255,Enhancers_Heart_13265,Enhancers_Heart_15211,Enhancers_Heart_15565,Enhancers_Heart_15570,Enhancers_Heart_15572,Enhancers_Heart_15590,Enhancers_Heart_1877,Enhancers_Heart_19615,Enhancers_Heart_19616,Enhancers_Heart_2264,Enhancers_Heart_2274,Enhancers_Heart_2294,Enhance…
												Enhancers_Heart_31326,Enhancers_Heart_31327,Enhancers_Heart_32221,Enhancers_Heart_32224,Enhancers_Heart_32226,Enhancers_Heart_36225,Enhancers_Heart_36228,Enhancers_Heart_36230,Enhancers_Heart_40976,Enhancers_Heart_40978,Enhancers_Heart_40979,Enhancers_Heart_40980,Enhancers_Heart_40981,Enhancers_Heart_40983,Enhancers_Heart_40984,Enhancers_Heart_69955,Enhancers_Heart_71994,Enhancers_Heart_8207,Enha…
												Enhancers_Heart_10572,Enhancers_Heart_13529,Enhancers_Heart_13532,Enhancers_Heart_13533,Enhancers_Heart_13552,Enhancers_Heart_13557,Enhancers_Heart_14474,Enhancers_Heart_14919,Enhancers_Heart_1615,Enhancers_Heart_16194,Enhancers_Heart_16195,Enhancers_Heart_16196,Enhancers_Heart_16205,Enhancers_Heart_16206,Enhancers_Heart_1639,Enhancers_Heart_1673,Enhancers_Heart_1677,Enhancers_Heart_1678,Enhancer…
												Enhancers_Heart_10108,Enhancers_Heart_10829,Enhancers_Heart_10833,Enhancers_Heart_12078,Enhancers_Heart_14919,Enhancers_Heart_15623,Enhancers_Heart_16438,Enhancers_Heart_17084,Enhancers_Heart_17576,Enhancers_Heart_19874,Enhancers_Heart_21390,Enhancers_Heart_21402,Enhancers_Heart_21915,Enhancers_Heart_24086,Enhancers_Heart_24094,Enhancers_Heart_24095,Enhancers_Heart_24891,Enhancers_Heart_25292,Enh…
												Enhancers_Heart_16620,Enhancers_Heart_1967,Enhancers_Heart_24840,Enhancers_Heart_24891,Enhancers_Heart_33301,Enhancers_Heart_33305,Enhancers_Heart_33334,Enhancers_Heart_33335,Enhancers_Heart_34853,Enhancers_Heart_34882,Enhancers_Heart_34883,Enhancers_Heart_4560,Enhancers_Heart_46746,Enhancers_Heart_59270,Enhancers_Heart_59274,Enhancers_Heart_59275,Enhancers_Heart_77259,Enhancers_Heart_77260,Enhan…
												Enhancers_Heart_16620,Enhancers_Heart_24840,Enhancers_Heart_24891,Enhancers_Heart_33301,Enhancers_Heart_33305,Enhancers_Heart_33334,Enhancers_Heart_33335,Enhancers_Heart_34853,Enhancers_Heart_34882,Enhancers_Heart_34883,Enhancers_Heart_4560,Enhancers_Heart_46746,Enhancers_Heart_59270,Enhancers_Heart_59274,Enhancers_Heart_59275,Enhancers_Heart_77259,Enhancers_Heart_77260,Enhancers_Heart_77261,Enha…
												Enhancers_Heart_10208,Enhancers_Heart_10572,Enhancers_Heart_10829,Enhancers_Heart_10833,Enhancers_Heart_11640,Enhancers_Heart_11641,Enhancers_Heart_12078,Enhancers_Heart_12593,Enhancers_Heart_12615,Enhancers_Heart_17154,Enhancers_Heart_202,Enhancers_Heart_21489,Enhancers_Heart_21545,Enhancers_Heart_21547,Enhancers_Heart_22066,Enhancers_Heart_22069,Enhancers_Heart_22072,Enhancers_Heart_22073,Enhan…
												Enhancers_Heart_12354,Enhancers_Heart_12372,Enhancers_Heart_14919,Enhancers_Heart_1967,Enhancers_Heart_20291,Enhancers_Heart_20305,Enhancers_Heart_26195,Enhancers_Heart_26212,Enhancers_Heart_26213,Enhancers_Heart_26227,Enhancers_Heart_26239,Enhancers_Heart_26247,Enhancers_Heart_26248,Enhancers_Heart_29719,Enhancers_Heart_30380,Enhancers_Heart_34978,Enhancers_Heart_34988,Enhancers_Heart_38437,Enha…
												Enhancers_Heart_10078,Enhancers_Heart_10108,Enhancers_Heart_1078,Enhancers_Heart_1087,Enhancers_Heart_10949,Enhancers_Heart_10980,Enhancers_Heart_10981,Enhancers_Heart_10983,Enhancers_Heart_11001,Enhancers_Heart_13290,Enhancers_Heart_13529,Enhancers_Heart_13532,Enhancers_Heart_13533,Enhancers_Heart_13552,Enhancers_Heart_13557,Enhancers_Heart_15623,Enhancers_Heart_15813,Enhancers_Heart_1607,Enhanc…
												Enhancers_Heart_12372,Enhancers_Heart_14919,Enhancers_Heart_1967,Enhancers_Heart_20291,Enhancers_Heart_20305,Enhancers_Heart_26195,Enhancers_Heart_26212,Enhancers_Heart_26213,Enhancers_Heart_26227,Enhancers_Heart_26239,Enhancers_Heart_26247,Enhancers_Heart_26248,Enhancers_Heart_29719,Enhancers_Heart_30380,Enhancers_Heart_34978,Enhancers_Heart_34988,Enhancers_Heart_38437,Enhancers_Heart_38438,Enha…
												Enhancers_Heart_10907,Enhancers_Heart_10909,Enhancers_Heart_10910,Enhancers_Heart_10929,Enhancers_Heart_10930,Enhancers_Heart_10931,Enhancers_Heart_11640,Enhancers_Heart_11641,Enhancers_Heart_13255,Enhancers_Heart_13265,Enhancers_Heart_17154,Enhancers_Heart_19874,Enhancers_Heart_19882,Enhancers_Heart_19889,Enhancers_Heart_22378,Enhancers_Heart_22380,Enhancers_Heart_22381,Enhancers_Heart_23391,Enh…
												Enhancers_Heart_14474,Enhancers_Heart_16324,Enhancers_Heart_21078,Enhancers_Heart_21108,Enhancers_Heart_21114,Enhancers_Heart_21123,Enhancers_Heart_21125,Enhancers_Heart_21141,Enhancers_Heart_21915,Enhancers_Heart_26195,Enhancers_Heart_26212,Enhancers_Heart_26213,Enhancers_Heart_26227,Enhancers_Heart_26239,Enhancers_Heart_26247,Enhancers_Heart_26248,Enhancers_Heart_28695,Enhancers_Heart_28697,Enh…
												Enhancers_Heart_10907,Enhancers_Heart_10909,Enhancers_Heart_10910,Enhancers_Heart_10929,Enhancers_Heart_10930,Enhancers_Heart_10931,Enhancers_Heart_11563,Enhancers_Heart_11573,Enhancers_Heart_11609,Enhancers_Heart_11612,Enhancers_Heart_13719,Enhancers_Heart_15787,Enhancers_Heart_16324,Enhancers_Heart_1877,Enhancers_Heart_20060,Enhancers_Heart_20064,Enhancers_Heart_20085,Enhancers_Heart_20479,Enha…
												Enhancers_Heart_10907,Enhancers_Heart_10909,Enhancers_Heart_10910,Enhancers_Heart_10929,Enhancers_Heart_10930,Enhancers_Heart_10931,Enhancers_Heart_20479,Enhancers_Heart_24673,Enhancers_Heart_26195,Enhancers_Heart_26212,Enhancers_Heart_26213,Enhancers_Heart_26227,Enhancers_Heart_26239,Enhancers_Heart_26247,Enhancers_Heart_26248,Enhancers_Heart_30228,Enhancers_Heart_30232,Enhancers_Heart_30235,Enh…
												Enhancers_Heart_11533,Enhancers_Heart_11534,Enhancers_Heart_11547,Enhancers_Heart_11551,Enhancers_Heart_26153,Enhancers_Heart_26154,Enhancers_Heart_26155,Enhancers_Heart_26156,Enhancers_Heart_26161,Enhancers_Heart_26176,Enhancers_Heart_26195,Enhancers_Heart_26212,Enhancers_Heart_26213,Enhancers_Heart_26227,Enhancers_Heart_26239,Enhancers_Heart_26247,Enhancers_Heart_26248,Enhancers_Heart_29061,Enh…
												Enhancers_Heart_10907,Enhancers_Heart_10909,Enhancers_Heart_10910,Enhancers_Heart_10929,Enhancers_Heart_10930,Enhancers_Heart_10931,Enhancers_Heart_11726,Enhancers_Heart_14919,Enhancers_Heart_19978,Enhancers_Heart_19980,Enhancers_Heart_19984,Enhancers_Heart_19985,Enhancers_Heart_19996,Enhancers_Heart_19997,Enhancers_Heart_20007,Enhancers_Heart_20013,Enhancers_Heart_20015,Enhancers_Heart_20023,Enh…
												Enhancers_Heart_10078,Enhancers_Heart_10907,Enhancers_Heart_10909,Enhancers_Heart_10910,Enhancers_Heart_10929,Enhancers_Heart_10930,Enhancers_Heart_10931,Enhancers_Heart_11001,Enhancers_Heart_11533,Enhancers_Heart_11534,Enhancers_Heart_11547,Enhancers_Heart_11551,Enhancers_Heart_12078,Enhancers_Heart_12372,Enhancers_Heart_12586,Enhancers_Heart_12593,Enhancers_Heart_13490,Enhancers_Heart_13495,Enh…
												Enhancers_Heart_104,Enhancers_Heart_10907,Enhancers_Heart_10909,Enhancers_Heart_10910,Enhancers_Heart_10929,Enhancers_Heart_10930,Enhancers_Heart_10931,Enhancers_Heart_12127,Enhancers_Heart_12593,Enhancers_Heart_12615,Enhancers_Heart_129,Enhancers_Heart_13255,Enhancers_Heart_13265,Enhancers_Heart_17274,Enhancers_Heart_20305,Enhancers_Heart_20405,Enhancers_Heart_21078,Enhancers_Heart_21108,Enhance…
												Enhancers_Heart_104,Enhancers_Heart_10572,Enhancers_Heart_12372,Enhancers_Heart_129,Enhancers_Heart_14466,Enhancers_Heart_14919,Enhancers_Heart_15623,Enhancers_Heart_15851,Enhancers_Heart_16690,Enhancers_Heart_16761,Enhancers_Heart_16764,Enhancers_Heart_16884,Enhancers_Heart_16885,Enhancers_Heart_17154,Enhancers_Heart_17696,Enhancers_Heart_18073,Enhancers_Heart_1877,Enhancers_Heart_19615,Enhancer…
												Enhancers_Heart_10078,Enhancers_Heart_104,Enhancers_Heart_10572,Enhancers_Heart_10907,Enhancers_Heart_10909,Enhancers_Heart_10910,Enhancers_Heart_10929,Enhancers_Heart_10930,Enhancers_Heart_10931,Enhancers_Heart_11001,Enhancers_Heart_11906,Enhancers_Heart_11910,Enhancers_Heart_12372,Enhancers_Heart_12593,Enhancers_Heart_12615,Enhancers_Heart_129,Enhancers_Heart_13255,Enhancers_Heart_13265,Enhance…
												Enhancers_Heart_15590,Enhancers_Heart_15623,Enhancers_Heart_20060,Enhancers_Heart_20064,Enhancers_Heart_20085,Enhancers_Heart_22502,Enhancers_Heart_22546,Enhancers_Heart_22551,Enhancers_Heart_22561,Enhancers_Heart_22569,Enhancers_Heart_25124,Enhancers_Heart_25126,Enhancers_Heart_25127,Enhancers_Heart_25395,Enhancers_Heart_28481,Enhancers_Heart_28486,Enhancers_Heart_28496,Enhancers_Heart_28512,Enh…
												Enhancers_Heart_10907,Enhancers_Heart_10909,Enhancers_Heart_10910,Enhancers_Heart_10929,Enhancers_Heart_10930,Enhancers_Heart_10931,Enhancers_Heart_12078,Enhancers_Heart_12093,Enhancers_Heart_13168,Enhancers_Heart_15623,Enhancers_Heart_20762,Enhancers_Heart_20764,Enhancers_Heart_20765,Enhancers_Heart_20767,Enhancers_Heart_22185,Enhancers_Heart_22200,Enhancers_Heart_23852,Enhancers_Heart_2407,Enha…
												Enhancers_Heart_10078,Enhancers_Heart_12372,Enhancers_Heart_15729,Enhancers_Heart_15730,Enhancers_Heart_23438,Enhancers_Heart_23443,Enhancers_Heart_23469,Enhancers_Heart_23492,Enhancers_Heart_23512,Enhancers_Heart_23516,Enhancers_Heart_23522,Enhancers_Heart_23532,Enhancers_Heart_23536,Enhancers_Heart_23548,Enhancers_Heart_23550,Enhancers_Heart_23560,Enhancers_Heart_25330,Enhancers_Heart_2660,Enha…
												Enhancers_Heart_12372,Enhancers_Heart_13255,Enhancers_Heart_13265,Enhancers_Heart_14919,Enhancers_Heart_16324,Enhancers_Heart_24673,Enhancers_Heart_28319,Enhancers_Heart_28320,Enhancers_Heart_28323,Enhancers_Heart_28329,Enhancers_Heart_28339,Enhancers_Heart_28340,Enhancers_Heart_28382,Enhancers_Heart_28481,Enhancers_Heart_28486,Enhancers_Heart_28496,Enhancers_Heart_29061,Enhancers_Heart_29065,Enh…
												Enhancers_Heart_10572,Enhancers_Heart_10829,Enhancers_Heart_10833,Enhancers_Heart_10864,Enhancers_Heart_10865,Enhancers_Heart_10907,Enhancers_Heart_10909,Enhancers_Heart_10910,Enhancers_Heart_10929,Enhancers_Heart_10930,Enhancers_Heart_10931,Enhancers_Heart_11563,Enhancers_Heart_11573,Enhancers_Heart_11609,Enhancers_Heart_11612,Enhancers_Heart_11640,Enhancers_Heart_11641,Enhancers_Heart_11906,Enh…
												Enhancers_Heart_23765,Enhancers_Heart_27832,Enhancers_Heart_27833,Enhancers_Heart_27834,Enhancers_Heart_27845,Enhancers_Heart_27846,Enhancers_Heart_27869,Enhancers_Heart_27870,Enhancers_Heart_27884,Enhancers_Heart_27886,Enhancers_Heart_27887,Enhancers_Heart_27895,Enhancers_Heart_27899,Enhancers_Heart_27923,Enhancers_Heart_27925,Enhancers_Heart_29719,Enhancers_Heart_3513,Enhancers_Heart_3524,Enhan…
												Enhancers_Heart_11001,Enhancers_Heart_11533,Enhancers_Heart_11534,Enhancers_Heart_11547,Enhancers_Heart_11551,Enhancers_Heart_14990,Enhancers_Heart_15623,Enhancers_Heart_17084,Enhancers_Heart_19404,Enhancers_Heart_19406,Enhancers_Heart_19432,Enhancers_Heart_19434,Enhancers_Heart_19438,Enhancers_Heart_19978,Enhancers_Heart_19980,Enhancers_Heart_19984,Enhancers_Heart_19985,Enhancers_Heart_19996,Enh…
												Enhancers_Heart_10907,Enhancers_Heart_10909,Enhancers_Heart_10910,Enhancers_Heart_10929,Enhancers_Heart_10930,Enhancers_Heart_10931,Enhancers_Heart_12354,Enhancers_Heart_12372,Enhancers_Heart_14919,Enhancers_Heart_1967,Enhancers_Heart_20291,Enhancers_Heart_20305,Enhancers_Heart_26195,Enhancers_Heart_26212,Enhancers_Heart_26213,Enhancers_Heart_26227,Enhancers_Heart_26239,Enhancers_Heart_26247,Enha…
												Enhancers_Heart_12078,Enhancers_Heart_16361,Enhancers_Heart_20479,Enhancers_Heart_22502,Enhancers_Heart_22546,Enhancers_Heart_22551,Enhancers_Heart_22561,Enhancers_Heart_22569,Enhancers_Heart_24673,Enhancers_Heart_25124,Enhancers_Heart_25126,Enhancers_Heart_25127,Enhancers_Heart_26071,Enhancers_Heart_26072,Enhancers_Heart_26083,Enhancers_Heart_29220,Enhancers_Heart_29243,Enhancers_Heart_29252,Enh…
												Enhancers_Heart_10907,Enhancers_Heart_10909,Enhancers_Heart_10910,Enhancers_Heart_10929,Enhancers_Heart_10930,Enhancers_Heart_10931,Enhancers_Heart_11001,Enhancers_Heart_11533,Enhancers_Heart_11534,Enhancers_Heart_11547,Enhancers_Heart_11551,Enhancers_Heart_14990,Enhancers_Heart_15046,Enhancers_Heart_15048,Enhancers_Heart_15049,Enhancers_Heart_15055,Enhancers_Heart_15056,Enhancers_Heart_15623,Enh…
												Enhancers_Heart_10907,Enhancers_Heart_10909,Enhancers_Heart_10910,Enhancers_Heart_10929,Enhancers_Heart_10930,Enhancers_Heart_10931,Enhancers_Heart_12078,Enhancers_Heart_12093,Enhancers_Heart_21078,Enhancers_Heart_21108,Enhancers_Heart_21114,Enhancers_Heart_21123,Enhancers_Heart_21125,Enhancers_Heart_21141,Enhancers_Heart_21915,Enhancers_Heart_22185,Enhancers_Heart_22200,Enhancers_Heart_2407,Enha…
												Enhancers_Heart_18459,Enhancers_Heart_18469,Enhancers_Heart_18534,Enhancers_Heart_18546,Enhancers_Heart_27772,Enhancers_Heart_29061,Enhancers_Heart_29065,Enhancers_Heart_29084,Enhancers_Heart_29220,Enhancers_Heart_29243,Enhancers_Heart_29252,Enhancers_Heart_29421,Enhancers_Heart_29422,Enhancers_Heart_29423,Enhancers_Heart_29424,Enhancers_Heart_32896,Enhancers_Heart_32901,Enhancers_Heart_32931,Enh…
												Enhancers_Heart_10108,Enhancers_Heart_10829,Enhancers_Heart_10833,Enhancers_Heart_12078,Enhancers_Heart_14919,Enhancers_Heart_15623,Enhancers_Heart_16438,Enhancers_Heart_17084,Enhancers_Heart_17576,Enhancers_Heart_19874,Enhancers_Heart_21390,Enhancers_Heart_21402,Enhancers_Heart_21915,Enhancers_Heart_24086,Enhancers_Heart_24094,Enhancers_Heart_24095,Enhancers_Heart_24891,Enhancers_Heart_25292,Enh…
												Enhancers_Heart_10907,Enhancers_Heart_10909,Enhancers_Heart_10910,Enhancers_Heart_10929,Enhancers_Heart_10930,Enhancers_Heart_10931,Enhancers_Heart_11640,Enhancers_Heart_11641,Enhancers_Heart_11726,Enhancers_Heart_16761,Enhancers_Heart_16764,Enhancers_Heart_19978,Enhancers_Heart_19980,Enhancers_Heart_19984,Enhancers_Heart_19985,Enhancers_Heart_19996,Enhancers_Heart_19997,Enhancers_Heart_20007,Enh…
												Enhancers_Heart_10907,Enhancers_Heart_10909,Enhancers_Heart_10910,Enhancers_Heart_10929,Enhancers_Heart_10930,Enhancers_Heart_10931,Enhancers_Heart_11533,Enhancers_Heart_11534,Enhancers_Heart_11547,Enhancers_Heart_11551,Enhancers_Heart_18073,Enhancers_Heart_21078,Enhancers_Heart_21108,Enhancers_Heart_21114,Enhancers_Heart_21123,Enhancers_Heart_21125,Enhancers_Heart_21141,Enhancers_Heart_26153,Enh…
												Enhancers_Heart_10698,Enhancers_Heart_10710,Enhancers_Heart_10729,Enhancers_Heart_12078,Enhancers_Heart_12622,Enhancers_Heart_12623,Enhancers_Heart_13424,Enhancers_Heart_13431,Enhancers_Heart_13455,Enhancers_Heart_13464,Enhancers_Heart_15623,Enhancers_Heart_16620,Enhancers_Heart_17134,Enhancers_Heart_19404,Enhancers_Heart_19406,Enhancers_Heart_19432,Enhancers_Heart_19434,Enhancers_Heart_19438,Enh…
												Enhancers_Heart_10078,Enhancers_Heart_10108,Enhancers_Heart_13075,Enhancers_Heart_13080,Enhancers_Heart_17154,Enhancers_Heart_23765,Enhancers_Heart_23910,Enhancers_Heart_23933,Enhancers_Heart_24086,Enhancers_Heart_24094,Enhancers_Heart_24095,Enhancers_Heart_26806,Enhancers_Heart_26841,Enhancers_Heart_26856,Enhancers_Heart_26857,Enhancers_Heart_26861,Enhancers_Heart_26886,Enhancers_Heart_26888,Enh…
												Enhancers_Heart_10907,Enhancers_Heart_10909,Enhancers_Heart_10910,Enhancers_Heart_10929,Enhancers_Heart_10930,Enhancers_Heart_10931,Enhancers_Heart_11640,Enhancers_Heart_11641,Enhancers_Heart_11906,Enhancers_Heart_11910,Enhancers_Heart_12078,Enhancers_Heart_13255,Enhancers_Heart_13265,Enhancers_Heart_14365,Enhancers_Heart_1615,Enhancers_Heart_16178,Enhancers_Heart_16181,Enhancers_Heart_16324,Enha…
												Enhancers_Heart_10907,Enhancers_Heart_10909,Enhancers_Heart_10910,Enhancers_Heart_10929,Enhancers_Heart_10930,Enhancers_Heart_10931,Enhancers_Heart_12078,Enhancers_Heart_12093,Enhancers_Heart_13168,Enhancers_Heart_15623,Enhancers_Heart_20762,Enhancers_Heart_20764,Enhancers_Heart_20765,Enhancers_Heart_20767,Enhancers_Heart_22185,Enhancers_Heart_22200,Enhancers_Heart_23852,Enhancers_Heart_2407,Enha…
												Enhancers_Heart_11726,Enhancers_Heart_15211,Enhancers_Heart_19978,Enhancers_Heart_19980,Enhancers_Heart_19984,Enhancers_Heart_19985,Enhancers_Heart_19996,Enhancers_Heart_19997,Enhancers_Heart_20007,Enhancers_Heart_20013,Enhancers_Heart_20015,Enhancers_Heart_20023,Enhancers_Heart_20048,Enhancers_Heart_20204,Enhancers_Heart_20209,Enhancers_Heart_20217,Enhancers_Heart_20228,Enhancers_Heart_20230,Enh…
												Enhancers_Heart_11640,Enhancers_Heart_11641,Enhancers_Heart_14294,Enhancers_Heart_18308,Enhancers_Heart_18309,Enhancers_Heart_18459,Enhancers_Heart_18469,Enhancers_Heart_18534,Enhancers_Heart_18546,Enhancers_Heart_20060,Enhancers_Heart_20064,Enhancers_Heart_20085,Enhancers_Heart_21078,Enhancers_Heart_21108,Enhancers_Heart_21114,Enhancers_Heart_21123,Enhancers_Heart_21125,Enhancers_Heart_21141,Enh…
												Enhancers_Heart_10108,Enhancers_Heart_10829,Enhancers_Heart_10833,Enhancers_Heart_12078,Enhancers_Heart_14919,Enhancers_Heart_15623,Enhancers_Heart_16438,Enhancers_Heart_19874,Enhancers_Heart_21390,Enhancers_Heart_21402,Enhancers_Heart_21915,Enhancers_Heart_24086,Enhancers_Heart_24094,Enhancers_Heart_24095,Enhancers_Heart_24891,Enhancers_Heart_25292,Enhancers_Heart_25495,Enhancers_Heart_28027,Enh…
												Enhancers_Heart_12127,Enhancers_Heart_13255,Enhancers_Heart_13265,Enhancers_Heart_17274,Enhancers_Heart_20405,Enhancers_Heart_21078,Enhancers_Heart_21108,Enhancers_Heart_21114,Enhancers_Heart_21123,Enhancers_Heart_21125,Enhancers_Heart_21141,Enhancers_Heart_22032,Enhancers_Heart_23358,Enhancers_Heart_23375,Enhancers_Heart_23376,Enhancers_Heart_23377,Enhancers_Heart_23378,Enhancers_Heart_28695,Enh…
												Enhancers_Heart_10078,Enhancers_Heart_12372,Enhancers_Heart_1607,Enhancers_Heart_16324,Enhancers_Heart_2022,Enhancers_Heart_2024,Enhancers_Heart_2030,Enhancers_Heart_20705,Enhancers_Heart_2083,Enhancers_Heart_21642,Enhancers_Heart_24086,Enhancers_Heart_24094,Enhancers_Heart_24095,Enhancers_Heart_26806,Enhancers_Heart_26841,Enhancers_Heart_26856,Enhancers_Heart_26857,Enhancers_Heart_26861,Enhancer…
												Enhancers_Heart_10078,Enhancers_Heart_10108,Enhancers_Heart_10208,Enhancers_Heart_1078,Enhancers_Heart_1087,Enhancers_Heart_10949,Enhancers_Heart_10980,Enhancers_Heart_10981,Enhancers_Heart_10983,Enhancers_Heart_11001,Enhancers_Heart_13290,Enhancers_Heart_13529,Enhancers_Heart_13532,Enhancers_Heart_13533,Enhancers_Heart_13552,Enhancers_Heart_13557,Enhancers_Heart_15169,Enhancers_Heart_15623,Enhan…
												Enhancers_Heart_10108,Enhancers_Heart_10219,Enhancers_Heart_10829,Enhancers_Heart_10833,Enhancers_Heart_10864,Enhancers_Heart_10865,Enhancers_Heart_10948,Enhancers_Heart_11299,Enhancers_Heart_11563,Enhancers_Heart_11573,Enhancers_Heart_11609,Enhancers_Heart_11612,Enhancers_Heart_11844,Enhancers_Heart_11883,Enhancers_Heart_11885,Enhancers_Heart_12078,Enhancers_Heart_12127,Enhancers_Heart_12354,Enh…
												Enhancers_Heart_104,Enhancers_Heart_129,Enhancers_Heart_20405,Enhancers_Heart_20601,Enhancers_Heart_20606,Enhancers_Heart_20610,Enhancers_Heart_21078,Enhancers_Heart_21108,Enhancers_Heart_21114,Enhancers_Heart_21123,Enhancers_Heart_21125,Enhancers_Heart_21141,Enhancers_Heart_22032,Enhancers_Heart_29220,Enhancers_Heart_29243,Enhancers_Heart_29252,Enhancers_Heart_29719,Enhancers_Heart_30210,Enhance…
												Enhancers_Heart_10208,Enhancers_Heart_12354,Enhancers_Heart_19404,Enhancers_Heart_19406,Enhancers_Heart_19432,Enhancers_Heart_19434,Enhancers_Heart_19438,Enhancers_Heart_22091,Enhancers_Heart_22095,Enhancers_Heart_28695,Enhancers_Heart_28697,Enhancers_Heart_28698,Enhancers_Heart_32388,Enhancers_Heart_32815,Enhancers_Heart_32844,Enhancers_Heart_32850,Enhancers_Heart_32851,Enhancers_Heart_32852,Enh…
												Enhancers_Heart_18651,Enhancers_Heart_20705,Enhancers_Heart_28695,Enhancers_Heart_28697,Enhancers_Heart_28698,Enhancers_Heart_34345,Enhancers_Heart_41823,Enhancers_Heart_50367,Enhancers_Heart_53641,Enhancers_Heart_58141,Enhancers_Heart_58146,Enhancers_Heart_58147,Enhancers_Heart_58153,Enhancers_Heart_78023,Enhancers_Heart_78037,Enhancers_Heart_80900,Enhancers_Heart_80923,Enhancers_Heart_80924,Enh…
												Enhancers_Heart_10078,Enhancers_Heart_12372,Enhancers_Heart_15729,Enhancers_Heart_15730,Enhancers_Heart_36563,Enhancers_Heart_80529,Enhancers_Heart_80708,Enhancers_Heart_9234,Enhancers_Heart_9243,Enhancers_Heart_9246,Enhancers_Heart_9248,Enhancers_Heart_9270
												Enhancers_Heart_10698,Enhancers_Heart_10710,Enhancers_Heart_10729,Enhancers_Heart_12078,Enhancers_Heart_13424,Enhancers_Heart_13431,Enhancers_Heart_13455,Enhancers_Heart_13464,Enhancers_Heart_17134,Enhancers_Heart_19404,Enhancers_Heart_19406,Enhancers_Heart_19432,Enhancers_Heart_19434,Enhancers_Heart_19438,Enhancers_Heart_20060,Enhancers_Heart_20064,Enhancers_Heart_20085,Enhancers_Heart_21308,Enh…
												Enhancers_Heart_10208,Enhancers_Heart_1078,Enhancers_Heart_10829,Enhancers_Heart_10833,Enhancers_Heart_1087,Enhancers_Heart_11299,Enhancers_Heart_12127,Enhancers_Heart_12333,Enhancers_Heart_13455,Enhancers_Heart_13464,Enhancers_Heart_13490,Enhancers_Heart_13495,Enhancers_Heart_13666,Enhancers_Heart_15169,Enhancers_Heart_16074,Enhancers_Heart_16108,Enhancers_Heart_16176,Enhancers_Heart_19608,Enhan…
												Enhancers_Heart_104,Enhancers_Heart_11533,Enhancers_Heart_11534,Enhancers_Heart_11547,Enhancers_Heart_11551,Enhancers_Heart_129,Enhancers_Heart_14365,Enhancers_Heart_14919,Enhancers_Heart_14990,Enhancers_Heart_14995,Enhancers_Heart_14997,Enhancers_Heart_16324,Enhancers_Heart_17274,Enhancers_Heart_17672,Enhancers_Heart_18011,Enhancers_Heart_18014,Enhancers_Heart_18015,Enhancers_Heart_18039,Enhance…
												Enhancers_Heart_2186,Enhancers_Heart_28795,Enhancers_Heart_29061,Enhancers_Heart_29065,Enhancers_Heart_29084,Enhancers_Heart_29220,Enhancers_Heart_29243,Enhancers_Heart_29252,Enhancers_Heart_29581,Enhancers_Heart_36199,Enhancers_Heart_41012,Enhancers_Heart_41047,Enhancers_Heart_42601,Enhancers_Heart_42606,Enhancers_Heart_42608,Enhancers_Heart_42611,Enhancers_Heart_42612,Enhancers_Heart_42613,Enha…
												Enhancers_Heart_10907,Enhancers_Heart_10909,Enhancers_Heart_10910,Enhancers_Heart_10929,Enhancers_Heart_10930,Enhancers_Heart_10931,Enhancers_Heart_11640,Enhancers_Heart_11641,Enhancers_Heart_13255,Enhancers_Heart_13265,Enhancers_Heart_17154,Enhancers_Heart_19874,Enhancers_Heart_19882,Enhancers_Heart_19889,Enhancers_Heart_22378,Enhancers_Heart_22380,Enhancers_Heart_22381,Enhancers_Heart_23391,Enh…
												Enhancers_Heart_44364,Enhancers_Heart_44369,Enhancers_Heart_44377,Enhancers_Heart_44387,Enhancers_Heart_44388,Enhancers_Heart_44409,Enhancers_Heart_44443,Enhancers_Heart_44444,Enhancers_Heart_46746,Enhancers_Heart_53519,Enhancers_Heart_53524,Enhancers_Heart_53536,Enhancers_Heart_54561,Enhancers_Heart_54568,Enhancers_Heart_64034,Enhancers_Heart_64036,Enhancers_Heart_6756,Enhancers_Heart_81841,Enha…
												Enhancers_Heart_15623,Enhancers_Heart_1967,Enhancers_Heart_19874,Enhancers_Heart_19882,Enhancers_Heart_19889,Enhancers_Heart_20060,Enhancers_Heart_20064,Enhancers_Heart_20085,Enhancers_Heart_20479,Enhancers_Heart_21489,Enhancers_Heart_21545,Enhancers_Heart_21547,Enhancers_Heart_26806,Enhancers_Heart_26841,Enhancers_Heart_26856,Enhancers_Heart_26857,Enhancers_Heart_26861,Enhancers_Heart_26886,Enha…
												Enhancers_Heart_12078,Enhancers_Heart_20479,Enhancers_Heart_22502,Enhancers_Heart_22546,Enhancers_Heart_22551,Enhancers_Heart_22561,Enhancers_Heart_22569,Enhancers_Heart_24673,Enhancers_Heart_25663,Enhancers_Heart_26195,Enhancers_Heart_26212,Enhancers_Heart_26213,Enhancers_Heart_26227,Enhancers_Heart_26239,Enhancers_Heart_26247,Enhancers_Heart_26248,Enhancers_Heart_26358,Enhancers_Heart_26361,Enh…
												Enhancers_Heart_10829,Enhancers_Heart_10833,Enhancers_Heart_10864,Enhancers_Heart_10865,Enhancers_Heart_10907,Enhancers_Heart_10909,Enhancers_Heart_10910,Enhancers_Heart_10929,Enhancers_Heart_10930,Enhancers_Heart_10931,Enhancers_Heart_11563,Enhancers_Heart_11573,Enhancers_Heart_11609,Enhancers_Heart_11612,Enhancers_Heart_11906,Enhancers_Heart_11910,Enhancers_Heart_12372,Enhancers_Heart_12593,Enh…
												Enhancers_Heart_11533,Enhancers_Heart_11534,Enhancers_Heart_11547,Enhancers_Heart_11551,Enhancers_Heart_26153,Enhancers_Heart_26154,Enhancers_Heart_26155,Enhancers_Heart_26156,Enhancers_Heart_26161,Enhancers_Heart_26176,Enhancers_Heart_26195,Enhancers_Heart_26212,Enhancers_Heart_26213,Enhancers_Heart_26227,Enhancers_Heart_26239,Enhancers_Heart_26247,Enhancers_Heart_26248,Enhancers_Heart_29061,Enh…
												Enhancers_Heart_104,Enhancers_Heart_12127,Enhancers_Heart_12593,Enhancers_Heart_12615,Enhancers_Heart_129,Enhancers_Heart_13255,Enhancers_Heart_13265,Enhancers_Heart_17274,Enhancers_Heart_20405,Enhancers_Heart_21078,Enhancers_Heart_21108,Enhancers_Heart_21114,Enhancers_Heart_21123,Enhancers_Heart_21125,Enhancers_Heart_21141,Enhancers_Heart_22032,Enhancers_Heart_22200,Enhancers_Heart_22650,Enhance…
												Enhancers_Heart_17274,Enhancers_Heart_18039,Enhancers_Heart_18045,Enhancers_Heart_18046,Enhancers_Heart_18049,Enhancers_Heart_18057,Enhancers_Heart_18058,Enhancers_Heart_20479,Enhancers_Heart_25475,Enhancers_Heart_29948,Enhancers_Heart_29958,Enhancers_Heart_30408,Enhancers_Heart_37004,Enhancers_Heart_37005,Enhancers_Heart_48911,Enhancers_Heart_48914,Enhancers_Heart_48916,Enhancers_Heart_48919,Enh…
												Enhancers_Heart_18039,Enhancers_Heart_18045,Enhancers_Heart_18046,Enhancers_Heart_18049,Enhancers_Heart_18057,Enhancers_Heart_18058,Enhancers_Heart_20479,Enhancers_Heart_28265,Enhancers_Heart_28271,Enhancers_Heart_28291,Enhancers_Heart_28292,Enhancers_Heart_42601,Enhancers_Heart_42606,Enhancers_Heart_42608,Enhancers_Heart_42611,Enhancers_Heart_42612,Enhancers_Heart_42613,Enhancers_Heart_4560,Enha…
												Enhancers_Heart_20060,Enhancers_Heart_20064,Enhancers_Heart_20085,Enhancers_Heart_21078,Enhancers_Heart_21108,Enhancers_Heart_21114,Enhancers_Heart_21123,Enhancers_Heart_21125,Enhancers_Heart_21141,Enhancers_Heart_29061,Enhancers_Heart_29065,Enhancers_Heart_29084,Enhancers_Heart_29719,Enhancers_Heart_29948,Enhancers_Heart_29958,Enhancers_Heart_32692,Enhancers_Heart_32693,Enhancers_Heart_32715,Enh…
												Enhancers_Heart_10108,Enhancers_Heart_10219,Enhancers_Heart_10829,Enhancers_Heart_10833,Enhancers_Heart_10864,Enhancers_Heart_10865,Enhancers_Heart_10948,Enhancers_Heart_11299,Enhancers_Heart_11563,Enhancers_Heart_11573,Enhancers_Heart_11609,Enhancers_Heart_11612,Enhancers_Heart_11844,Enhancers_Heart_11883,Enhancers_Heart_11885,Enhancers_Heart_12078,Enhancers_Heart_12127,Enhancers_Heart_12354,Enh…
												Enhancers_Heart_13529,Enhancers_Heart_13532,Enhancers_Heart_13533,Enhancers_Heart_13552,Enhancers_Heart_13557,Enhancers_Heart_15623,Enhancers_Heart_1607,Enhancers_Heart_16438,Enhancers_Heart_22111,Enhancers_Heart_22115,Enhancers_Heart_22118,Enhancers_Heart_22378,Enhancers_Heart_22380,Enhancers_Heart_22381,Enhancers_Heart_22920,Enhancers_Heart_25475,Enhancers_Heart_26806,Enhancers_Heart_26841,Enha…
												Enhancers_Heart_10078,Enhancers_Heart_10108,Enhancers_Heart_10949,Enhancers_Heart_13290,Enhancers_Heart_13529,Enhancers_Heart_13532,Enhancers_Heart_13533,Enhancers_Heart_13552,Enhancers_Heart_13557,Enhancers_Heart_15169,Enhancers_Heart_15623,Enhancers_Heart_15813,Enhancers_Heart_15851,Enhancers_Heart_1607,Enhancers_Heart_16438,Enhancers_Heart_17576,Enhancers_Heart_18,Enhancers_Heart_19304,Enhance…
												Enhancers_Heart_10078,Enhancers_Heart_104,Enhancers_Heart_11906,Enhancers_Heart_11910,Enhancers_Heart_12372,Enhancers_Heart_129,Enhancers_Heart_14466,Enhancers_Heart_14919,Enhancers_Heart_15729,Enhancers_Heart_15730,Enhancers_Heart_16176,Enhancers_Heart_17274,Enhancers_Heart_1877,Enhancers_Heart_1967,Enhancers_Heart_20142,Enhancers_Heart_20144,Enhancers_Heart_20172,Enhancers_Heart_20183,Enhancers…
												Enhancers_Heart_10078,Enhancers_Heart_104,Enhancers_Heart_11906,Enhancers_Heart_11910,Enhancers_Heart_12372,Enhancers_Heart_129,Enhancers_Heart_14466,Enhancers_Heart_14919,Enhancers_Heart_15729,Enhancers_Heart_15730,Enhancers_Heart_16176,Enhancers_Heart_17274,Enhancers_Heart_1877,Enhancers_Heart_1967,Enhancers_Heart_20142,Enhancers_Heart_20144,Enhancers_Heart_20172,Enhancers_Heart_20183,Enhancers…
												Enhancers_Heart_30098,Enhancers_Heart_33033,Enhancers_Heart_33034,Enhancers_Heart_33053,Enhancers_Heart_33055,Enhancers_Heart_33101,Enhancers_Heart_33102,Enhancers_Heart_33104,Enhancers_Heart_45873,Enhancers_Heart_45901,Enhancers_Heart_467,Enhancers_Heart_54116,Enhancers_Heart_71005,Enhancers_Heart_84390,Enhancers_Heart_84396,Enhancers_Heart_84405,Enhancers_Heart_84429,Enhancers_Heart_84432,Enhan…
												Enhancers_Heart_10219,Enhancers_Heart_10907,Enhancers_Heart_10909,Enhancers_Heart_10910,Enhancers_Heart_10929,Enhancers_Heart_10930,Enhancers_Heart_10931,Enhancers_Heart_10948,Enhancers_Heart_11001,Enhancers_Heart_1134,Enhancers_Heart_11533,Enhancers_Heart_11534,Enhancers_Heart_11547,Enhancers_Heart_11551,Enhancers_Heart_11691,Enhancers_Heart_11692,Enhancers_Heart_11696,Enhancers_Heart_11698,Enha…
												Enhancers_Heart_10108,Enhancers_Heart_10219,Enhancers_Heart_10829,Enhancers_Heart_10833,Enhancers_Heart_10864,Enhancers_Heart_10865,Enhancers_Heart_10948,Enhancers_Heart_11299,Enhancers_Heart_11563,Enhancers_Heart_11573,Enhancers_Heart_11609,Enhancers_Heart_11612,Enhancers_Heart_11844,Enhancers_Heart_11883,Enhancers_Heart_11885,Enhancers_Heart_12078,Enhancers_Heart_12127,Enhancers_Heart_12354,Enh…
												Enhancers_Heart_14474,Enhancers_Heart_15565,Enhancers_Heart_15570,Enhancers_Heart_15572,Enhancers_Heart_15623,Enhancers_Heart_16690,Enhancers_Heart_18331,Enhancers_Heart_18332,Enhancers_Heart_21489,Enhancers_Heart_21545,Enhancers_Heart_21547,Enhancers_Heart_2186,Enhancers_Heart_22111,Enhancers_Heart_22115,Enhancers_Heart_22118,Enhancers_Heart_22185,Enhancers_Heart_22200,Enhancers_Heart_22885,Enha…
												Enhancers_Heart_10572,Enhancers_Heart_12372,Enhancers_Heart_14466,Enhancers_Heart_14919,Enhancers_Heart_16761,Enhancers_Heart_16764,Enhancers_Heart_16884,Enhancers_Heart_16885,Enhancers_Heart_19615,Enhancers_Heart_19616,Enhancers_Heart_20863,Enhancers_Heart_22111,Enhancers_Heart_22115,Enhancers_Heart_22118,Enhancers_Heart_28596,Enhancers_Heart_31379,Enhancers_Heart_31380,Enhancers_Heart_34853,Enh…
												Enhancers_Heart_30483,Enhancers_Heart_3548,Enhancers_Heart_3549,Enhancers_Heart_3550,Enhancers_Heart_66569,Enhancers_Heart_66571,Enhancers_Heart_92590,Enhancers_Heart_92598,Enhancers_Heart_92600,Enhancers_Heart_92602,Enhancers_Heart_92603,Enhancers_Heart_92604
												Enhancers_Heart_15623,Enhancers_Heart_1615,Enhancers_Heart_1639,Enhancers_Heart_1673,Enhancers_Heart_1677,Enhancers_Heart_1678,Enhancers_Heart_20405,Enhancers_Heart_22032,Enhancers_Heart_31379,Enhancers_Heart_31380,Enhancers_Heart_36563,Enhancers_Heart_38221,Enhancers_Heart_39682,Enhancers_Heart_39696,Enhancers_Heart_39698,Enhancers_Heart_41012,Enhancers_Heart_41047,Enhancers_Heart_42152,Enhancer…
												Enhancers_Heart_10219,Enhancers_Heart_10948,Enhancers_Heart_11533,Enhancers_Heart_11534,Enhancers_Heart_11547,Enhancers_Heart_11551,Enhancers_Heart_11691,Enhancers_Heart_11692,Enhancers_Heart_11696,Enhancers_Heart_11698,Enhancers_Heart_11699,Enhancers_Heart_11717,Enhancers_Heart_13424,Enhancers_Heart_13431,Enhancers_Heart_14365,Enhancers_Heart_15382,Enhancers_Heart_16176,Enhancers_Heart_202,Enhan…
												Enhancers_Heart_14311,Enhancers_Heart_26195,Enhancers_Heart_26212,Enhancers_Heart_26213,Enhancers_Heart_26227,Enhancers_Heart_26239,Enhancers_Heart_26247,Enhancers_Heart_26248,Enhancers_Heart_28695,Enhancers_Heart_28697,Enhancers_Heart_28698,Enhancers_Heart_29948,Enhancers_Heart_29958,Enhancers_Heart_33563,Enhancers_Heart_33564,Enhancers_Heart_3799,Enhancers_Heart_48044,Enhancers_Heart_54298,Enha…
												Enhancers_Heart_10219,Enhancers_Heart_10948,Enhancers_Heart_11533,Enhancers_Heart_11534,Enhancers_Heart_11547,Enhancers_Heart_11551,Enhancers_Heart_11691,Enhancers_Heart_11692,Enhancers_Heart_11696,Enhancers_Heart_11698,Enhancers_Heart_11699,Enhancers_Heart_11717,Enhancers_Heart_13424,Enhancers_Heart_13431,Enhancers_Heart_14365,Enhancers_Heart_15382,Enhancers_Heart_16176,Enhancers_Heart_202,Enhan…
												Enhancers_Heart_10078,Enhancers_Heart_10108,Enhancers_Heart_10949,Enhancers_Heart_12372,Enhancers_Heart_13290,Enhancers_Heart_13529,Enhancers_Heart_13532,Enhancers_Heart_13533,Enhancers_Heart_13552,Enhancers_Heart_13557,Enhancers_Heart_14919,Enhancers_Heart_15169,Enhancers_Heart_15623,Enhancers_Heart_15813,Enhancers_Heart_15851,Enhancers_Heart_1607,Enhancers_Heart_16324,Enhancers_Heart_16438,Enha…
												Enhancers_Heart_10208,Enhancers_Heart_10829,Enhancers_Heart_10833,Enhancers_Heart_11299,Enhancers_Heart_12333,Enhancers_Heart_13455,Enhancers_Heart_13464,Enhancers_Heart_13490,Enhancers_Heart_13495,Enhancers_Heart_16074,Enhancers_Heart_16176,Enhancers_Heart_19608,Enhancers_Heart_19615,Enhancers_Heart_19616,Enhancers_Heart_20880,Enhancers_Heart_20881,Enhancers_Heart_20882,Enhancers_Heart_20906,Enh…
												Enhancers_Heart_14294,Enhancers_Heart_15623,Enhancers_Heart_24673,Enhancers_Heart_31326,Enhancers_Heart_31327,Enhancers_Heart_33033,Enhancers_Heart_33034,Enhancers_Heart_33053,Enhancers_Heart_33055,Enhancers_Heart_33101,Enhancers_Heart_33102,Enhancers_Heart_33104,Enhancers_Heart_44099,Enhancers_Heart_44103,Enhancers_Heart_44108,Enhancers_Heart_44111,Enhancers_Heart_54116,Enhancers_Heart_55413,Enh…
												Enhancers_Heart_10208,Enhancers_Heart_10907,Enhancers_Heart_10909,Enhancers_Heart_10910,Enhancers_Heart_10929,Enhancers_Heart_10930,Enhancers_Heart_10931,Enhancers_Heart_11640,Enhancers_Heart_11641,Enhancers_Heart_12078,Enhancers_Heart_12593,Enhancers_Heart_12615,Enhancers_Heart_1581,Enhancers_Heart_1607,Enhancers_Heart_16884,Enhancers_Heart_16885,Enhancers_Heart_17004,Enhancers_Heart_17009,Enhan…
												Enhancers_Heart_10078,Enhancers_Heart_10108,Enhancers_Heart_104,Enhancers_Heart_129,Enhancers_Heart_15623,Enhancers_Heart_16884,Enhancers_Heart_16885,Enhancers_Heart_24673,Enhancers_Heart_28265,Enhancers_Heart_28271,Enhancers_Heart_28291,Enhancers_Heart_28292,Enhancers_Heart_29220,Enhancers_Heart_29243,Enhancers_Heart_29252,Enhancers_Heart_30228,Enhancers_Heart_30232,Enhancers_Heart_30235,Enhance…
												Enhancers_Heart_10078,Enhancers_Heart_104,Enhancers_Heart_11906,Enhancers_Heart_11910,Enhancers_Heart_12372,Enhancers_Heart_129,Enhancers_Heart_14466,Enhancers_Heart_14919,Enhancers_Heart_15729,Enhancers_Heart_15730,Enhancers_Heart_16176,Enhancers_Heart_17274,Enhancers_Heart_1877,Enhancers_Heart_1967,Enhancers_Heart_20142,Enhancers_Heart_20144,Enhancers_Heart_20172,Enhancers_Heart_20183,Enhancers…
												Enhancers_Heart_20060,Enhancers_Heart_20064,Enhancers_Heart_20085,Enhancers_Heart_21078,Enhancers_Heart_21108,Enhancers_Heart_21114,Enhancers_Heart_21123,Enhancers_Heart_21125,Enhancers_Heart_21141,Enhancers_Heart_29061,Enhancers_Heart_29065,Enhancers_Heart_29084,Enhancers_Heart_29719,Enhancers_Heart_29948,Enhancers_Heart_29958,Enhancers_Heart_32692,Enhancers_Heart_32693,Enhancers_Heart_32715,Enh…
												Enhancers_Heart_11001,Enhancers_Heart_15623,Enhancers_Heart_2407,Enhancers_Heart_2411,Enhancers_Heart_2418,Enhancers_Heart_2423,Enhancers_Heart_3934,Enhancers_Heart_3935,Enhancers_Heart_49167,Enhancers_Heart_49168,Enhancers_Heart_56735,Enhancers_Heart_68264,Enhancers_Heart_68272,Enhancers_Heart_75367,Enhancers_Heart_83206,Enhancers_Heart_85467,Enhancers_Heart_92205,Enhancers_Heart_92208,Enhancers…
												Enhancers_Heart_10907,Enhancers_Heart_10909,Enhancers_Heart_10910,Enhancers_Heart_10929,Enhancers_Heart_10930,Enhancers_Heart_10931,Enhancers_Heart_11563,Enhancers_Heart_11573,Enhancers_Heart_11609,Enhancers_Heart_11612,Enhancers_Heart_13719,Enhancers_Heart_15787,Enhancers_Heart_16324,Enhancers_Heart_1877,Enhancers_Heart_20060,Enhancers_Heart_20064,Enhancers_Heart_20085,Enhancers_Heart_20479,Enha…
												Enhancers_Heart_24673,Enhancers_Heart_29155,Enhancers_Heart_29158,Enhancers_Heart_29161,Enhancers_Heart_29312,Enhancers_Heart_29323,Enhancers_Heart_29324,Enhancers_Heart_30228,Enhancers_Heart_30232,Enhancers_Heart_30235,Enhancers_Heart_30243,Enhancers_Heart_4560,Enhancers_Heart_49992,Enhancers_Heart_50000,Enhancers_Heart_50001,Enhancers_Heart_57083,Enhancers_Heart_61068,Enhancers_Heart_61080,Enha…
												Enhancers_Heart_104,Enhancers_Heart_11906,Enhancers_Heart_11910,Enhancers_Heart_12127,Enhancers_Heart_12593,Enhancers_Heart_12615,Enhancers_Heart_129,Enhancers_Heart_13255,Enhancers_Heart_13265,Enhancers_Heart_14474,Enhancers_Heart_15217,Enhancers_Heart_1615,Enhancers_Heart_16176,Enhancers_Heart_16324,Enhancers_Heart_1639,Enhancers_Heart_16475,Enhancers_Heart_16690,Enhancers_Heart_1673,Enhancers_…
												Enhancers_Heart_10078,Enhancers_Heart_10108,Enhancers_Heart_10174,Enhancers_Heart_10907,Enhancers_Heart_10909,Enhancers_Heart_10910,Enhancers_Heart_10929,Enhancers_Heart_10930,Enhancers_Heart_10931,Enhancers_Heart_11001,Enhancers_Heart_12078,Enhancers_Heart_14365,Enhancers_Heart_14686,Enhancers_Heart_15729,Enhancers_Heart_15730,Enhancers_Heart_15851,Enhancers_Heart_16176,Enhancers_Heart_17028,Enh…
												Enhancers_Heart_13666,Enhancers_Heart_13676,Enhancers_Heart_13684,Enhancers_Heart_14474,Enhancers_Heart_1615,Enhancers_Heart_16324,Enhancers_Heart_1639,Enhancers_Heart_1673,Enhancers_Heart_1677,Enhancers_Heart_1678,Enhancers_Heart_23349,Enhancers_Heart_27832,Enhancers_Heart_27833,Enhancers_Heart_27834,Enhancers_Heart_27845,Enhancers_Heart_27846,Enhancers_Heart_27869,Enhancers_Heart_27870,Enhancer…
												Enhancers_Heart_10078,Enhancers_Heart_10108,Enhancers_Heart_10949,Enhancers_Heart_12372,Enhancers_Heart_13290,Enhancers_Heart_13529,Enhancers_Heart_13532,Enhancers_Heart_13533,Enhancers_Heart_13552,Enhancers_Heart_13557,Enhancers_Heart_14919,Enhancers_Heart_15623,Enhancers_Heart_15813,Enhancers_Heart_1607,Enhancers_Heart_16324,Enhancers_Heart_16438,Enhancers_Heart_19304,Enhancers_Heart_19305,Enha…
												Enhancers_Heart_10208,Enhancers_Heart_1078,Enhancers_Heart_10829,Enhancers_Heart_10833,Enhancers_Heart_1087,Enhancers_Heart_10907,Enhancers_Heart_10909,Enhancers_Heart_10910,Enhancers_Heart_10929,Enhancers_Heart_10930,Enhancers_Heart_10931,Enhancers_Heart_11299,Enhancers_Heart_12127,Enhancers_Heart_12333,Enhancers_Heart_12354,Enhancers_Heart_13290,Enhancers_Heart_13455,Enhancers_Heart_13464,Enhan…
												Enhancers_Heart_12372,Enhancers_Heart_16194,Enhancers_Heart_16195,Enhancers_Heart_16196,Enhancers_Heart_16205,Enhancers_Heart_16206,Enhancers_Heart_29220,Enhancers_Heart_29243,Enhancers_Heart_29252,Enhancers_Heart_31894,Enhancers_Heart_34480,Enhancers_Heart_35092,Enhancers_Heart_35093,Enhancers_Heart_38221,Enhancers_Heart_42208,Enhancers_Heart_42211,Enhancers_Heart_42244,Enhancers_Heart_42249,Enh…
												Enhancers_Heart_49134,Enhancers_Heart_49167,Enhancers_Heart_49168,Enhancers_Heart_53650,Enhancers_Heart_76560,Enhancers_Heart_80459
												Enhancers_Heart_10907,Enhancers_Heart_10909,Enhancers_Heart_10910,Enhancers_Heart_10929,Enhancers_Heart_10930,Enhancers_Heart_10931,Enhancers_Heart_12372,Enhancers_Heart_13195,Enhancers_Heart_13202,Enhancers_Heart_13255,Enhancers_Heart_13265,Enhancers_Heart_13666,Enhancers_Heart_13676,Enhancers_Heart_13684,Enhancers_Heart_14213,Enhancers_Heart_14919,Enhancers_Heart_16074,Enhancers_Heart_1615,Enha…
												Enhancers_Heart_10078,Enhancers_Heart_10108,Enhancers_Heart_104,Enhancers_Heart_11906,Enhancers_Heart_11910,Enhancers_Heart_12372,Enhancers_Heart_129,Enhancers_Heart_14466,Enhancers_Heart_14919,Enhancers_Heart_15729,Enhancers_Heart_15730,Enhancers_Heart_16176,Enhancers_Heart_17274,Enhancers_Heart_1877,Enhancers_Heart_1967,Enhancers_Heart_20142,Enhancers_Heart_20144,Enhancers_Heart_20172,Enhancers…
												Enhancers_Heart_10108,Enhancers_Heart_10907,Enhancers_Heart_10909,Enhancers_Heart_10910,Enhancers_Heart_10929,Enhancers_Heart_10930,Enhancers_Heart_10931,Enhancers_Heart_11533,Enhancers_Heart_11534,Enhancers_Heart_11547,Enhancers_Heart_11551,Enhancers_Heart_12078,Enhancers_Heart_13424,Enhancers_Heart_13431,Enhancers_Heart_15046,Enhancers_Heart_15048,Enhancers_Heart_15049,Enhancers_Heart_15055,Enh…
												Enhancers_Heart_10907,Enhancers_Heart_10909,Enhancers_Heart_10910,Enhancers_Heart_10929,Enhancers_Heart_10930,Enhancers_Heart_10931,Enhancers_Heart_11563,Enhancers_Heart_11573,Enhancers_Heart_11609,Enhancers_Heart_11612,Enhancers_Heart_11640,Enhancers_Heart_11641,Enhancers_Heart_11726,Enhancers_Heart_12078,Enhancers_Heart_12127,Enhancers_Heart_12372,Enhancers_Heart_13195,Enhancers_Heart_13202,Enh…
												Enhancers_Heart_10829,Enhancers_Heart_10833,Enhancers_Heart_10864,Enhancers_Heart_10865,Enhancers_Heart_10907,Enhancers_Heart_10909,Enhancers_Heart_10910,Enhancers_Heart_10929,Enhancers_Heart_10930,Enhancers_Heart_10931,Enhancers_Heart_11563,Enhancers_Heart_11573,Enhancers_Heart_11609,Enhancers_Heart_11612,Enhancers_Heart_11906,Enhancers_Heart_11910,Enhancers_Heart_12593,Enhancers_Heart_12615,Enh…
												Enhancers_Heart_10078,Enhancers_Heart_10108,Enhancers_Heart_10907,Enhancers_Heart_10909,Enhancers_Heart_10910,Enhancers_Heart_10929,Enhancers_Heart_10930,Enhancers_Heart_10931,Enhancers_Heart_11001,Enhancers_Heart_15729,Enhancers_Heart_15730,Enhancers_Heart_15851,Enhancers_Heart_23852,Enhancers_Heart_27941,Enhancers_Heart_27942,Enhancers_Heart_27943,Enhancers_Heart_27950,Enhancers_Heart_27951,Enh…
												Enhancers_Heart_10907,Enhancers_Heart_10909,Enhancers_Heart_10910,Enhancers_Heart_10929,Enhancers_Heart_10930,Enhancers_Heart_10931,Enhancers_Heart_11563,Enhancers_Heart_11573,Enhancers_Heart_11609,Enhancers_Heart_11612,Enhancers_Heart_12078,Enhancers_Heart_12127,Enhancers_Heart_12372,Enhancers_Heart_13195,Enhancers_Heart_13202,Enhancers_Heart_13255,Enhancers_Heart_13265,Enhancers_Heart_13424,Enh…
												Enhancers_Heart_10078,Enhancers_Heart_10108,Enhancers_Heart_10949,Enhancers_Heart_13290,Enhancers_Heart_13529,Enhancers_Heart_13532,Enhancers_Heart_13533,Enhancers_Heart_13552,Enhancers_Heart_13557,Enhancers_Heart_15623,Enhancers_Heart_15813,Enhancers_Heart_1607,Enhancers_Heart_16438,Enhancers_Heart_19304,Enhancers_Heart_19305,Enhancers_Heart_19316,Enhancers_Heart_20705,Enhancers_Heart_21327,Enha…
												Enhancers_Heart_10219,Enhancers_Heart_10948,Enhancers_Heart_11533,Enhancers_Heart_11534,Enhancers_Heart_11547,Enhancers_Heart_11551,Enhancers_Heart_13424,Enhancers_Heart_13431,Enhancers_Heart_14365,Enhancers_Heart_15382,Enhancers_Heart_16176,Enhancers_Heart_202,Enhancers_Heart_207,Enhancers_Heart_21915,Enhancers_Heart_22663,Enhancers_Heart_24673,Enhancers_Heart_28695,Enhancers_Heart_28697,Enhance…
												Enhancers_Heart_12372,Enhancers_Heart_1607,Enhancers_Heart_16324,Enhancers_Heart_20705,Enhancers_Heart_24086,Enhancers_Heart_24094,Enhancers_Heart_24095,Enhancers_Heart_26806,Enhancers_Heart_26841,Enhancers_Heart_26856,Enhancers_Heart_26857,Enhancers_Heart_26861,Enhancers_Heart_26886,Enhancers_Heart_26888,Enhancers_Heart_26889,Enhancers_Heart_26893,Enhancers_Heart_26897,Enhancers_Heart_26899,Enha…
												Enhancers_Heart_10572,Enhancers_Heart_10907,Enhancers_Heart_10909,Enhancers_Heart_10910,Enhancers_Heart_10929,Enhancers_Heart_10930,Enhancers_Heart_10931,Enhancers_Heart_12127,Enhancers_Heart_15169,Enhancers_Heart_18073,Enhancers_Heart_20060,Enhancers_Heart_20064,Enhancers_Heart_20085,Enhancers_Heart_20475,Enhancers_Heart_20705,Enhancers_Heart_2149,Enhancers_Heart_2150,Enhancers_Heart_2151,Enhanc…
												Enhancers_Heart_10219,Enhancers_Heart_10948,Enhancers_Heart_11533,Enhancers_Heart_11534,Enhancers_Heart_11547,Enhancers_Heart_11551,Enhancers_Heart_12078,Enhancers_Heart_13424,Enhancers_Heart_13431,Enhancers_Heart_14365,Enhancers_Heart_14990,Enhancers_Heart_15382,Enhancers_Heart_16176,Enhancers_Heart_17329,Enhancers_Heart_202,Enhancers_Heart_207,Enhancers_Heart_21078,Enhancers_Heart_21108,Enhance…
												Enhancers_Heart_1134,Enhancers_Heart_26195,Enhancers_Heart_26212,Enhancers_Heart_26213,Enhancers_Heart_26227,Enhancers_Heart_26239,Enhancers_Heart_26247,Enhancers_Heart_26248,Enhancers_Heart_29220,Enhancers_Heart_29243,Enhancers_Heart_29252,Enhancers_Heart_29533,Enhancers_Heart_33033,Enhancers_Heart_33034,Enhancers_Heart_33053,Enhancers_Heart_33055,Enhancers_Heart_33101,Enhancers_Heart_33102,Enha…
												Enhancers_Heart_10078,Enhancers_Heart_10108,Enhancers_Heart_11533,Enhancers_Heart_11534,Enhancers_Heart_11547,Enhancers_Heart_11551,Enhancers_Heart_12372,Enhancers_Heart_15729,Enhancers_Heart_15730,Enhancers_Heart_15787,Enhancers_Heart_20060,Enhancers_Heart_20064,Enhancers_Heart_20085,Enhancers_Heart_20291,Enhancers_Heart_20305,Enhancers_Heart_21078,Enhancers_Heart_21108,Enhancers_Heart_21114,Enh…
												Enhancers_Heart_10078,Enhancers_Heart_10108,Enhancers_Heart_10174,Enhancers_Heart_12127,Enhancers_Heart_13424,Enhancers_Heart_13431,Enhancers_Heart_13455,Enhancers_Heart_13464,Enhancers_Heart_13666,Enhancers_Heart_15309,Enhancers_Heart_15310,Enhancers_Heart_15851,Enhancers_Heart_1607,Enhancers_Heart_16108,Enhancers_Heart_1615,Enhancers_Heart_16178,Enhancers_Heart_16181,Enhancers_Heart_16236,Enhan…
												Enhancers_Heart_10907,Enhancers_Heart_10909,Enhancers_Heart_10910,Enhancers_Heart_10929,Enhancers_Heart_10930,Enhancers_Heart_10931,Enhancers_Heart_12078,Enhancers_Heart_14311,Enhancers_Heart_14990,Enhancers_Heart_15169,Enhancers_Heart_15590,Enhancers_Heart_15623,Enhancers_Heart_16361,Enhancers_Heart_17672,Enhancers_Heart_18011,Enhancers_Heart_18014,Enhancers_Heart_18015,Enhancers_Heart_18039,Enh…
												Enhancers_Heart_12372,Enhancers_Heart_1607,Enhancers_Heart_16324,Enhancers_Heart_16884,Enhancers_Heart_16885,Enhancers_Heart_17004,Enhancers_Heart_17009,Enhancers_Heart_17274,Enhancers_Heart_20503,Enhancers_Heart_23358,Enhancers_Heart_23375,Enhancers_Heart_23376,Enhancers_Heart_23377,Enhancers_Heart_23378,Enhancers_Heart_24086,Enhancers_Heart_24094,Enhancers_Heart_24095,Enhancers_Heart_26806,Enha…
												Enhancers_Heart_14474,Enhancers_Heart_15565,Enhancers_Heart_15570,Enhancers_Heart_15572,Enhancers_Heart_15623,Enhancers_Heart_16690,Enhancers_Heart_18331,Enhancers_Heart_18332,Enhancers_Heart_21489,Enhancers_Heart_21545,Enhancers_Heart_21547,Enhancers_Heart_2186,Enhancers_Heart_22111,Enhancers_Heart_22115,Enhancers_Heart_22118,Enhancers_Heart_22185,Enhancers_Heart_22200,Enhancers_Heart_22885,Enha…
												Enhancers_Heart_10907,Enhancers_Heart_10909,Enhancers_Heart_10910,Enhancers_Heart_10929,Enhancers_Heart_10930,Enhancers_Heart_10931,Enhancers_Heart_16324,Enhancers_Heart_1877,Enhancers_Heart_20479,Enhancers_Heart_24673,Enhancers_Heart_26195,Enhancers_Heart_26212,Enhancers_Heart_26213,Enhancers_Heart_26227,Enhancers_Heart_26239,Enhancers_Heart_26247,Enhancers_Heart_26248,Enhancers_Heart_29061,Enha…
												Enhancers_Heart_10174,Enhancers_Heart_1078,Enhancers_Heart_10829,Enhancers_Heart_10833,Enhancers_Heart_1087,Enhancers_Heart_11299,Enhancers_Heart_12127,Enhancers_Heart_12333,Enhancers_Heart_12593,Enhancers_Heart_12615,Enhancers_Heart_13455,Enhancers_Heart_13464,Enhancers_Heart_13490,Enhancers_Heart_13495,Enhancers_Heart_13666,Enhancers_Heart_14640,Enhancers_Heart_14641,Enhancers_Heart_14643,Enhan…
												Enhancers_Heart_1615,Enhancers_Heart_1639,Enhancers_Heart_1673,Enhancers_Heart_1677,Enhancers_Heart_1678,Enhancers_Heart_24673,Enhancers_Heart_26195,Enhancers_Heart_26212,Enhancers_Heart_26213,Enhancers_Heart_26227,Enhancers_Heart_26239,Enhancers_Heart_26247,Enhancers_Heart_26248,Enhancers_Heart_69165,Enhancers_Heart_6955,Enhancers_Heart_6991,Enhancers_Heart_6992,Enhancers_Heart_6998,Enhancers_He…
												Enhancers_Heart_10829,Enhancers_Heart_10833,Enhancers_Heart_10907,Enhancers_Heart_10909,Enhancers_Heart_10910,Enhancers_Heart_10929,Enhancers_Heart_10930,Enhancers_Heart_10931,Enhancers_Heart_10948,Enhancers_Heart_11640,Enhancers_Heart_11641,Enhancers_Heart_12078,Enhancers_Heart_12354,Enhancers_Heart_12372,Enhancers_Heart_14474,Enhancers_Heart_15217,Enhancers_Heart_15851,Enhancers_Heart_17084,Enh…
												Enhancers_Heart_104,Enhancers_Heart_10572,Enhancers_Heart_10598,Enhancers_Heart_12593,Enhancers_Heart_12615,Enhancers_Heart_129,Enhancers_Heart_13529,Enhancers_Heart_13532,Enhancers_Heart_13533,Enhancers_Heart_13552,Enhancers_Heart_13557,Enhancers_Heart_13666,Enhancers_Heart_13676,Enhancers_Heart_13684,Enhancers_Heart_14474,Enhancers_Heart_15787,Enhancers_Heart_1615,Enhancers_Heart_16324,Enhancer…
												Enhancers_Heart_15623,Enhancers_Heart_17696,Enhancers_Heart_20405,Enhancers_Heart_31379,Enhancers_Heart_31380,Enhancers_Heart_36563,Enhancers_Heart_3799,Enhancers_Heart_3809,Enhancers_Heart_38221,Enhancers_Heart_39682,Enhancers_Heart_39696,Enhancers_Heart_39698,Enhancers_Heart_41012,Enhancers_Heart_41047,Enhancers_Heart_42152,Enhancers_Heart_42158,Enhancers_Heart_42159,Enhancers_Heart_42160,Enhan…
												Enhancers_Heart_10108,Enhancers_Heart_10929,Enhancers_Heart_10930,Enhancers_Heart_10931,Enhancers_Heart_14294,Enhancers_Heart_14618,Enhancers_Heart_15787,Enhancers_Heart_16658,Enhancers_Heart_17329,Enhancers_Heart_19882,Enhancers_Heart_19889,Enhancers_Heart_20060,Enhancers_Heart_20064,Enhancers_Heart_20085,Enhancers_Heart_25364,Enhancers_Heart_26761,Enhancers_Heart_26763,Enhancers_Heart_26764,Enh…
												Enhancers_Heart_10572,Enhancers_Heart_11001,Enhancers_Heart_13529,Enhancers_Heart_13532,Enhancers_Heart_13533,Enhancers_Heart_14676,Enhancers_Heart_1491,Enhancers_Heart_16324,Enhancers_Heart_16690,Enhancers_Heart_18073,Enhancers_Heart_18308,Enhancers_Heart_18309,Enhancers_Heart_19615,Enhancers_Heart_19616,Enhancers_Heart_202,Enhancers_Heart_21915,Enhancers_Heart_28319,Enhancers_Heart_28320,Enhanc…
												Enhancers_Heart_10907,Enhancers_Heart_10909,Enhancers_Heart_10910,Enhancers_Heart_10929,Enhancers_Heart_10930,Enhancers_Heart_10931,Enhancers_Heart_11001,Enhancers_Heart_11533,Enhancers_Heart_11534,Enhancers_Heart_11547,Enhancers_Heart_11551,Enhancers_Heart_12372,Enhancers_Heart_12586,Enhancers_Heart_12593,Enhancers_Heart_13490,Enhancers_Heart_13495,Enhancers_Heart_13511,Enhancers_Heart_14474,Enh…
												Enhancers_Heart_1607,Enhancers_Heart_1615,Enhancers_Heart_16324,Enhancers_Heart_1639,Enhancers_Heart_16658,Enhancers_Heart_18651,Enhancers_Heart_20705,Enhancers_Heart_21308,Enhancers_Heart_23910,Enhancers_Heart_23933,Enhancers_Heart_26733,Enhancers_Heart_26741,Enhancers_Heart_26750,Enhancers_Heart_26761,Enhancers_Heart_26763,Enhancers_Heart_26764,Enhancers_Heart_26765,Enhancers_Heart_26766,Enhanc…
												Enhancers_Heart_10907,Enhancers_Heart_10909,Enhancers_Heart_10910,Enhancers_Heart_10929,Enhancers_Heart_10930,Enhancers_Heart_10931,Enhancers_Heart_11726,Enhancers_Heart_14919,Enhancers_Heart_16324,Enhancers_Heart_16761,Enhancers_Heart_16764,Enhancers_Heart_18073,Enhancers_Heart_1967,Enhancers_Heart_19978,Enhancers_Heart_19980,Enhancers_Heart_19984,Enhancers_Heart_19985,Enhancers_Heart_19996,Enha…
												Enhancers_Heart_25292,Enhancers_Heart_29220,Enhancers_Heart_29243,Enhancers_Heart_29252,Enhancers_Heart_39509,Enhancers_Heart_41012,Enhancers_Heart_41047,Enhancers_Heart_42152,Enhancers_Heart_42158,Enhancers_Heart_42159,Enhancers_Heart_42160,Enhancers_Heart_42161,Enhancers_Heart_42163,Enhancers_Heart_42190,Enhancers_Heart_53040,Enhancers_Heart_53044,Enhancers_Heart_53067,Enhancers_Heart_53082,Enh…
												Enhancers_Heart_10078,Enhancers_Heart_10108,Enhancers_Heart_10907,Enhancers_Heart_10909,Enhancers_Heart_10910,Enhancers_Heart_10929,Enhancers_Heart_10930,Enhancers_Heart_10931,Enhancers_Heart_11001,Enhancers_Heart_12078,Enhancers_Heart_14365,Enhancers_Heart_15729,Enhancers_Heart_15730,Enhancers_Heart_15851,Enhancers_Heart_17028,Enhancers_Heart_19874,Enhancers_Heart_19882,Enhancers_Heart_19889,Enh…
												Enhancers_Heart_14919,Enhancers_Heart_26195,Enhancers_Heart_26212,Enhancers_Heart_26213,Enhancers_Heart_26227,Enhancers_Heart_26239,Enhancers_Heart_26247,Enhancers_Heart_26248,Enhancers_Heart_34978,Enhancers_Heart_34988,Enhancers_Heart_48757,Enhancers_Heart_48758,Enhancers_Heart_48760,Enhancers_Heart_48769,Enhancers_Heart_48770,Enhancers_Heart_53455,Enhancers_Heart_74330,Enhancers_Heart_74332,Enh…
												Enhancers_Heart_10108,Enhancers_Heart_10572,Enhancers_Heart_10829,Enhancers_Heart_10833,Enhancers_Heart_10907,Enhancers_Heart_10909,Enhancers_Heart_10910,Enhancers_Heart_10929,Enhancers_Heart_10930,Enhancers_Heart_10931,Enhancers_Heart_11640,Enhancers_Heart_11641,Enhancers_Heart_12078,Enhancers_Heart_12127,Enhancers_Heart_14919,Enhancers_Heart_15409,Enhancers_Heart_15623,Enhancers_Heart_16438,Enh…
												Enhancers_Heart_14919,Enhancers_Heart_16324,Enhancers_Heart_2306,Enhancers_Heart_2307,Enhancers_Heart_2309,Enhancers_Heart_2310,Enhancers_Heart_26195,Enhancers_Heart_26212,Enhancers_Heart_26213,Enhancers_Heart_26227,Enhancers_Heart_26239,Enhancers_Heart_26247,Enhancers_Heart_26248,Enhancers_Heart_27772,Enhancers_Heart_27832,Enhancers_Heart_27833,Enhancers_Heart_27834,Enhancers_Heart_27845,Enhance…
												Enhancers_Heart_10572,Enhancers_Heart_12354,Enhancers_Heart_13195,Enhancers_Heart_13202,Enhancers_Heart_15590,Enhancers_Heart_1877,Enhancers_Heart_21078,Enhancers_Heart_21108,Enhancers_Heart_21114,Enhancers_Heart_21123,Enhancers_Heart_21125,Enhancers_Heart_21141,Enhancers_Heart_2149,Enhancers_Heart_2150,Enhancers_Heart_2151,Enhancers_Heart_22663,Enhancers_Heart_25663,Enhancers_Heart_28265,Enhance…
												Enhancers_Heart_13529,Enhancers_Heart_13532,Enhancers_Heart_13533,Enhancers_Heart_13552,Enhancers_Heart_13557,Enhancers_Heart_15623,Enhancers_Heart_15851,Enhancers_Heart_1607,Enhancers_Heart_16324,Enhancers_Heart_16438,Enhancers_Heart_17576,Enhancers_Heart_20705,Enhancers_Heart_22111,Enhancers_Heart_22115,Enhancers_Heart_22118,Enhancers_Heart_22378,Enhancers_Heart_22380,Enhancers_Heart_22381,Enha…
												Enhancers_Heart_13255,Enhancers_Heart_13265,Enhancers_Heart_14919,Enhancers_Heart_19874,Enhancers_Heart_19882,Enhancers_Heart_19889,Enhancers_Heart_20705,Enhancers_Heart_34345,Enhancers_Heart_44840,Enhancers_Heart_44847,Enhancers_Heart_62152,Enhancers_Heart_62155,Enhancers_Heart_62175,Enhancers_Heart_72096,Enhancers_Heart_72122,Enhancers_Heart_72123,Enhancers_Heart_72130,Enhancers_Heart_73752,Enh…
												Enhancers_Heart_16475,Enhancers_Heart_18073,Enhancers_Heart_20863,Enhancers_Heart_27531,Enhancers_Heart_27544,Enhancers_Heart_27551,Enhancers_Heart_27832,Enhancers_Heart_27833,Enhancers_Heart_27834,Enhancers_Heart_27845,Enhancers_Heart_27846,Enhancers_Heart_27869,Enhancers_Heart_27870,Enhancers_Heart_27884,Enhancers_Heart_27886,Enhancers_Heart_27887,Enhancers_Heart_27895,Enhancers_Heart_27899,Enh…
												Enhancers_Heart_10078,Enhancers_Heart_10108,Enhancers_Heart_10208,Enhancers_Heart_10907,Enhancers_Heart_10909,Enhancers_Heart_10910,Enhancers_Heart_10929,Enhancers_Heart_10930,Enhancers_Heart_10931,Enhancers_Heart_11640,Enhancers_Heart_11641,Enhancers_Heart_12078,Enhancers_Heart_13075,Enhancers_Heart_13080,Enhancers_Heart_1581,Enhancers_Heart_17004,Enhancers_Heart_17009,Enhancers_Heart_17154,Enha…
												Enhancers_Heart_10907,Enhancers_Heart_10909,Enhancers_Heart_10910,Enhancers_Heart_10929,Enhancers_Heart_10930,Enhancers_Heart_10931,Enhancers_Heart_17274,Enhancers_Heart_19615,Enhancers_Heart_19616,Enhancers_Heart_19978,Enhancers_Heart_19980,Enhancers_Heart_19984,Enhancers_Heart_19985,Enhancers_Heart_19996,Enhancers_Heart_19997,Enhancers_Heart_20007,Enhancers_Heart_20013,Enhancers_Heart_20015,Enh…
												Enhancers_Heart_11001,Enhancers_Heart_11533,Enhancers_Heart_11534,Enhancers_Heart_11547,Enhancers_Heart_11551,Enhancers_Heart_14990,Enhancers_Heart_15623,Enhancers_Heart_17084,Enhancers_Heart_2407,Enhancers_Heart_2411,Enhancers_Heart_2418,Enhancers_Heart_2423,Enhancers_Heart_29421,Enhancers_Heart_29422,Enhancers_Heart_29423,Enhancers_Heart_29424,Enhancers_Heart_35993,Enhancers_Heart_36001,Enhance…
												Enhancers_Heart_10108,Enhancers_Heart_10829,Enhancers_Heart_10833,Enhancers_Heart_10864,Enhancers_Heart_10865,Enhancers_Heart_10907,Enhancers_Heart_10909,Enhancers_Heart_10910,Enhancers_Heart_10929,Enhancers_Heart_10930,Enhancers_Heart_10931,Enhancers_Heart_10948,Enhancers_Heart_11299,Enhancers_Heart_11640,Enhancers_Heart_11641,Enhancers_Heart_12078,Enhancers_Heart_12093,Enhancers_Heart_12354,Enh…
												Enhancers_Heart_104,Enhancers_Heart_10572,Enhancers_Heart_12372,Enhancers_Heart_129,Enhancers_Heart_14466,Enhancers_Heart_14919,Enhancers_Heart_15933,Enhancers_Heart_16690,Enhancers_Heart_16761,Enhancers_Heart_16764,Enhancers_Heart_16884,Enhancers_Heart_16885,Enhancers_Heart_19615,Enhancers_Heart_19616,Enhancers_Heart_20863,Enhancers_Heart_21408,Enhancers_Heart_22066,Enhancers_Heart_22069,Enhance…
												Enhancers_Heart_17274,Enhancers_Heart_18039,Enhancers_Heart_18045,Enhancers_Heart_18046,Enhancers_Heart_18049,Enhancers_Heart_18057,Enhancers_Heart_18058,Enhancers_Heart_20479,Enhancers_Heart_29948,Enhancers_Heart_29958,Enhancers_Heart_30408,Enhancers_Heart_37004,Enhancers_Heart_37005,Enhancers_Heart_49992,Enhancers_Heart_50000,Enhancers_Heart_50001,Enhancers_Heart_58770,Enhancers_Heart_60874,Enh…
												Enhancers_Heart_13255,Enhancers_Heart_13265,Enhancers_Heart_23765,Enhancers_Heart_28319,Enhancers_Heart_28320,Enhancers_Heart_28323,Enhancers_Heart_28329,Enhancers_Heart_28339,Enhancers_Heart_28340,Enhancers_Heart_28382,Enhancers_Heart_28481,Enhancers_Heart_28486,Enhancers_Heart_28496,Enhancers_Heart_88917,Enhancers_Heart_88920,Enhancers_Heart_88923,Enhancers_Heart_88924,Enhancers_Heart_90492,Enh…
												Enhancers_Heart_15623,Enhancers_Heart_15787,Enhancers_Heart_1967,Enhancers_Heart_19874,Enhancers_Heart_19882,Enhancers_Heart_19889,Enhancers_Heart_20060,Enhancers_Heart_20064,Enhancers_Heart_20085,Enhancers_Heart_20479,Enhancers_Heart_21489,Enhancers_Heart_21545,Enhancers_Heart_21547,Enhancers_Heart_26806,Enhancers_Heart_26841,Enhancers_Heart_26856,Enhancers_Heart_26857,Enhancers_Heart_26861,Enha…
												Enhancers_Heart_10572,Enhancers_Heart_10829,Enhancers_Heart_10833,Enhancers_Heart_10864,Enhancers_Heart_10865,Enhancers_Heart_10907,Enhancers_Heart_10909,Enhancers_Heart_10910,Enhancers_Heart_10929,Enhancers_Heart_10930,Enhancers_Heart_10931,Enhancers_Heart_11563,Enhancers_Heart_11573,Enhancers_Heart_11609,Enhancers_Heart_11612,Enhancers_Heart_11906,Enhancers_Heart_11910,Enhancers_Heart_12372,Enh…
												Enhancers_Heart_35426,Enhancers_Heart_67727,Enhancers_Heart_85251,Enhancers_Heart_89132,Enhancers_Heart_93616,Enhancers_Heart_94981
												Enhancers_Heart_17274,Enhancers_Heart_18039,Enhancers_Heart_18045,Enhancers_Heart_18046,Enhancers_Heart_18049,Enhancers_Heart_18057,Enhancers_Heart_18058,Enhancers_Heart_20479,Enhancers_Heart_29948,Enhancers_Heart_29958,Enhancers_Heart_30408,Enhancers_Heart_37004,Enhancers_Heart_37005,Enhancers_Heart_49992,Enhancers_Heart_50000,Enhancers_Heart_50001,Enhancers_Heart_60874,Enhancers_Heart_60881,Enh…
												Enhancers_Heart_10907,Enhancers_Heart_10909,Enhancers_Heart_10910,Enhancers_Heart_10929,Enhancers_Heart_10930,Enhancers_Heart_10931,Enhancers_Heart_16324,Enhancers_Heart_17274,Enhancers_Heart_19615,Enhancers_Heart_19616,Enhancers_Heart_19874,Enhancers_Heart_19882,Enhancers_Heart_19889,Enhancers_Heart_19978,Enhancers_Heart_19980,Enhancers_Heart_19984,Enhancers_Heart_19985,Enhancers_Heart_19996,Enh…
												Enhancers_Heart_15623,Enhancers_Heart_31379,Enhancers_Heart_31380,Enhancers_Heart_36563,Enhancers_Heart_38221,Enhancers_Heart_39682,Enhancers_Heart_39696,Enhancers_Heart_39698,Enhancers_Heart_42152,Enhancers_Heart_42158,Enhancers_Heart_42159,Enhancers_Heart_42160,Enhancers_Heart_42161,Enhancers_Heart_42163,Enhancers_Heart_42190,Enhancers_Heart_43462,Enhancers_Heart_43471,Enhancers_Heart_43472,Enh…
												Enhancers_Heart_11001,Enhancers_Heart_1171,Enhancers_Heart_1249,Enhancers_Heart_1274,Enhancers_Heart_14311,Enhancers_Heart_14618,Enhancers_Heart_14686,Enhancers_Heart_17084,Enhancers_Heart_18606,Enhancers_Heart_1877,Enhancers_Heart_18979,Enhancers_Heart_19874,Enhancers_Heart_19882,Enhancers_Heart_19889,Enhancers_Heart_20183,Enhancers_Heart_20204,Enhancers_Heart_21442,Enhancers_Heart_21443,Enhance…
												Enhancers_Heart_10208,Enhancers_Heart_10829,Enhancers_Heart_10833,Enhancers_Heart_11299,Enhancers_Heart_12333,Enhancers_Heart_13455,Enhancers_Heart_13464,Enhancers_Heart_13490,Enhancers_Heart_13495,Enhancers_Heart_16074,Enhancers_Heart_16176,Enhancers_Heart_19608,Enhancers_Heart_19615,Enhancers_Heart_19616,Enhancers_Heart_20880,Enhancers_Heart_20881,Enhancers_Heart_20882,Enhancers_Heart_20906,Enh…
												Enhancers_Heart_10078,Enhancers_Heart_10108,Enhancers_Heart_10907,Enhancers_Heart_10909,Enhancers_Heart_10910,Enhancers_Heart_10929,Enhancers_Heart_10930,Enhancers_Heart_10931,Enhancers_Heart_11001,Enhancers_Heart_12372,Enhancers_Heart_12593,Enhancers_Heart_12615,Enhancers_Heart_13195,Enhancers_Heart_13202,Enhancers_Heart_13255,Enhancers_Heart_13265,Enhancers_Heart_13290,Enhancers_Heart_13666,Enh…
												Enhancers_Heart_32692,Enhancers_Heart_32693,Enhancers_Heart_32715,Enhancers_Heart_32722,Enhancers_Heart_33223,Enhancers_Heart_3548,Enhancers_Heart_3549,Enhancers_Heart_3550,Enhancers_Heart_39362,Enhancers_Heart_90091
												Enhancers_Heart_10208,Enhancers_Heart_10907,Enhancers_Heart_10909,Enhancers_Heart_10910,Enhancers_Heart_10929,Enhancers_Heart_10930,Enhancers_Heart_10931,Enhancers_Heart_12354,Enhancers_Heart_13529,Enhancers_Heart_13532,Enhancers_Heart_13533,Enhancers_Heart_13552,Enhancers_Heart_13557,Enhancers_Heart_19404,Enhancers_Heart_19406,Enhancers_Heart_19432,Enhancers_Heart_19434,Enhancers_Heart_19438,Enh…
												Enhancers_Heart_14474,Enhancers_Heart_26195,Enhancers_Heart_26212,Enhancers_Heart_26213,Enhancers_Heart_26227,Enhancers_Heart_26239,Enhancers_Heart_26247,Enhancers_Heart_26248,Enhancers_Heart_32952,Enhancers_Heart_34853,Enhancers_Heart_67044,Enhancers_Heart_67062,Enhancers_Heart_79633,Enhancers_Heart_87335,Enhancers_Heart_87339,Enhancers_Heart_87349
												Enhancers_Heart_10907,Enhancers_Heart_10909,Enhancers_Heart_10910,Enhancers_Heart_10929,Enhancers_Heart_10930,Enhancers_Heart_10931,Enhancers_Heart_11563,Enhancers_Heart_11573,Enhancers_Heart_11609,Enhancers_Heart_11612,Enhancers_Heart_16324,Enhancers_Heart_1877,Enhancers_Heart_20060,Enhancers_Heart_20064,Enhancers_Heart_20085,Enhancers_Heart_20479,Enhancers_Heart_24673,Enhancers_Heart_24840,Enha…
												Enhancers_Heart_10208,Enhancers_Heart_10572,Enhancers_Heart_10829,Enhancers_Heart_10833,Enhancers_Heart_12078,Enhancers_Heart_13195,Enhancers_Heart_13202,Enhancers_Heart_14294,Enhancers_Heart_14311,Enhancers_Heart_16896,Enhancers_Heart_16911,Enhancers_Heart_17154,Enhancers_Heart_19615,Enhancers_Heart_19616,Enhancers_Heart_19978,Enhancers_Heart_19980,Enhancers_Heart_19984,Enhancers_Heart_19985,Enh…
												Enhancers_Heart_73752,Enhancers_Heart_73753,Enhancers_Heart_73754,Enhancers_Heart_73755,Enhancers_Heart_73770,Enhancers_Heart_73774,Enhancers_Heart_75109,Enhancers_Heart_75110,Enhancers_Heart_75114,Enhancers_Heart_75115,Enhancers_Heart_75116,Enhancers_Heart_78084,Enhancers_Heart_78111,Enhancers_Heart_78118,Enhancers_Heart_78152,Enhancers_Heart_78159
												Enhancers_Heart_11001,Enhancers_Heart_2407,Enhancers_Heart_2411,Enhancers_Heart_2418,Enhancers_Heart_2423,Enhancers_Heart_3934,Enhancers_Heart_3935,Enhancers_Heart_49167,Enhancers_Heart_49168,Enhancers_Heart_56735,Enhancers_Heart_68264,Enhancers_Heart_68272,Enhancers_Heart_75367,Enhancers_Heart_83206,Enhancers_Heart_85467,Enhancers_Heart_92205,Enhancers_Heart_92208,Enhancers_Heart_92212,Enhancers…
												Enhancers_Heart_1615,Enhancers_Heart_16324,Enhancers_Heart_1639,Enhancers_Heart_1673,Enhancers_Heart_1677,Enhancers_Heart_1678,Enhancers_Heart_27832,Enhancers_Heart_27833,Enhancers_Heart_27834,Enhancers_Heart_27845,Enhancers_Heart_27846,Enhancers_Heart_27869,Enhancers_Heart_27870,Enhancers_Heart_27884,Enhancers_Heart_27886,Enhancers_Heart_27887,Enhancers_Heart_27895,Enhancers_Heart_27899,Enhancer…
												Enhancers_Heart_10078,Enhancers_Heart_10108,Enhancers_Heart_10949,Enhancers_Heart_13290,Enhancers_Heart_15623,Enhancers_Heart_15813,Enhancers_Heart_19304,Enhancers_Heart_19305,Enhancers_Heart_19316,Enhancers_Heart_20705,Enhancers_Heart_21327,Enhancers_Heart_21332,Enhancers_Heart_21334,Enhancers_Heart_21336,Enhancers_Heart_22920,Enhancers_Heart_25475,Enhancers_Heart_29421,Enhancers_Heart_29422,Enh…
												Enhancers_Heart_10208,Enhancers_Heart_10572,Enhancers_Heart_10907,Enhancers_Heart_10909,Enhancers_Heart_10910,Enhancers_Heart_10929,Enhancers_Heart_10930,Enhancers_Heart_10931,Enhancers_Heart_12127,Enhancers_Heart_12354,Enhancers_Heart_13529,Enhancers_Heart_13532,Enhancers_Heart_13533,Enhancers_Heart_13552,Enhancers_Heart_13557,Enhancers_Heart_14640,Enhancers_Heart_14641,Enhancers_Heart_14643,Enh…
												Enhancers_Heart_10219,Enhancers_Heart_10907,Enhancers_Heart_10909,Enhancers_Heart_10910,Enhancers_Heart_10929,Enhancers_Heart_10930,Enhancers_Heart_10931,Enhancers_Heart_11640,Enhancers_Heart_11641,Enhancers_Heart_11834,Enhancers_Heart_12078,Enhancers_Heart_12127,Enhancers_Heart_12372,Enhancers_Heart_12593,Enhancers_Heart_12615,Enhancers_Heart_13075,Enhancers_Heart_13080,Enhancers_Heart_13255,Enh…
												Enhancers_Heart_10829,Enhancers_Heart_10833,Enhancers_Heart_10864,Enhancers_Heart_10865,Enhancers_Heart_10907,Enhancers_Heart_10909,Enhancers_Heart_10910,Enhancers_Heart_10929,Enhancers_Heart_10930,Enhancers_Heart_10931,Enhancers_Heart_11563,Enhancers_Heart_11573,Enhancers_Heart_11609,Enhancers_Heart_11612,Enhancers_Heart_11906,Enhancers_Heart_11910,Enhancers_Heart_12593,Enhancers_Heart_12615,Enh…
												Enhancers_Heart_10907,Enhancers_Heart_10909,Enhancers_Heart_10910,Enhancers_Heart_10929,Enhancers_Heart_10930,Enhancers_Heart_10931,Enhancers_Heart_11001,Enhancers_Heart_11533,Enhancers_Heart_11534,Enhancers_Heart_11547,Enhancers_Heart_11551,Enhancers_Heart_12372,Enhancers_Heart_12586,Enhancers_Heart_12593,Enhancers_Heart_13490,Enhancers_Heart_13495,Enhancers_Heart_13511,Enhancers_Heart_14439,Enh…
												Enhancers_Heart_14294,Enhancers_Heart_21489,Enhancers_Heart_21545,Enhancers_Heart_21547,Enhancers_Heart_22603,Enhancers_Heart_22604,Enhancers_Heart_22615,Enhancers_Heart_22629,Enhancers_Heart_26195,Enhancers_Heart_26212,Enhancers_Heart_26213,Enhancers_Heart_26227,Enhancers_Heart_26239,Enhancers_Heart_26247,Enhancers_Heart_26248,Enhancers_Heart_2660,Enhancers_Heart_29220,Enhancers_Heart_29243,Enha…
												Enhancers_Heart_10907,Enhancers_Heart_10909,Enhancers_Heart_10910,Enhancers_Heart_10929,Enhancers_Heart_10930,Enhancers_Heart_10931,Enhancers_Heart_12372,Enhancers_Heart_13195,Enhancers_Heart_13202,Enhancers_Heart_13255,Enhancers_Heart_13265,Enhancers_Heart_17154,Enhancers_Heart_17576,Enhancers_Heart_19615,Enhancers_Heart_19616,Enhancers_Heart_20479,Enhancers_Heart_24673,Enhancers_Heart_25475,Enh…
												Enhancers_Heart_10907,Enhancers_Heart_10909,Enhancers_Heart_10910,Enhancers_Heart_10929,Enhancers_Heart_10930,Enhancers_Heart_10931,Enhancers_Heart_16324,Enhancers_Heart_1877,Enhancers_Heart_20479,Enhancers_Heart_24673,Enhancers_Heart_26195,Enhancers_Heart_26212,Enhancers_Heart_26213,Enhancers_Heart_26227,Enhancers_Heart_26239,Enhancers_Heart_26247,Enhancers_Heart_26248,Enhancers_Heart_29061,Enha…
												Enhancers_Heart_12078,Enhancers_Heart_14990,Enhancers_Heart_15169,Enhancers_Heart_15590,Enhancers_Heart_16361,Enhancers_Heart_17672,Enhancers_Heart_18011,Enhancers_Heart_18014,Enhancers_Heart_18015,Enhancers_Heart_18039,Enhancers_Heart_18045,Enhancers_Heart_18046,Enhancers_Heart_18049,Enhancers_Heart_18057,Enhancers_Heart_18058,Enhancers_Heart_19874,Enhancers_Heart_19882,Enhancers_Heart_19889,Enh…
												Enhancers_Heart_10078,Enhancers_Heart_10108,Enhancers_Heart_10208,Enhancers_Heart_10698,Enhancers_Heart_10710,Enhancers_Heart_10729,Enhancers_Heart_10907,Enhancers_Heart_10909,Enhancers_Heart_10910,Enhancers_Heart_10929,Enhancers_Heart_10930,Enhancers_Heart_10931,Enhancers_Heart_11640,Enhancers_Heart_11641,Enhancers_Heart_12078,Enhancers_Heart_12372,Enhancers_Heart_12593,Enhancers_Heart_12615,Enh…
												Enhancers_Heart_104,Enhancers_Heart_129,Enhancers_Heart_16690,Enhancers_Heart_16884,Enhancers_Heart_16885,Enhancers_Heart_22111,Enhancers_Heart_22115,Enhancers_Heart_22118,Enhancers_Heart_25364,Enhancers_Heart_25557,Enhancers_Heart_28695,Enhancers_Heart_28697,Enhancers_Heart_28698,Enhancers_Heart_29061,Enhancers_Heart_29065,Enhancers_Heart_29084,Enhancers_Heart_29220,Enhancers_Heart_29243,Enhance…
												Enhancers_Heart_12372,Enhancers_Heart_1607,Enhancers_Heart_16324,Enhancers_Heart_16884,Enhancers_Heart_16885,Enhancers_Heart_17004,Enhancers_Heart_17009,Enhancers_Heart_17274,Enhancers_Heart_18331,Enhancers_Heart_18332,Enhancers_Heart_20085,Enhancers_Heart_20503,Enhancers_Heart_23358,Enhancers_Heart_23375,Enhancers_Heart_23376,Enhancers_Heart_23377,Enhancers_Heart_23378,Enhancers_Heart_23391,Enha…
												Enhancers_Heart_24673,Enhancers_Heart_26195,Enhancers_Heart_26212,Enhancers_Heart_26213,Enhancers_Heart_26227,Enhancers_Heart_26239,Enhancers_Heart_26247,Enhancers_Heart_26248,Enhancers_Heart_69165,Enhancers_Heart_6955,Enhancers_Heart_6991,Enhancers_Heart_6992,Enhancers_Heart_6998,Enhancers_Heart_7011,Enhancers_Heart_7027,Enhancers_Heart_7028,Enhancers_Heart_7032,Enhancers_Heart_7054,Enhancers_He…
												Enhancers_Heart_12354,Enhancers_Heart_12372,Enhancers_Heart_16194,Enhancers_Heart_16195,Enhancers_Heart_16196,Enhancers_Heart_16205,Enhancers_Heart_16206,Enhancers_Heart_18308,Enhancers_Heart_18309,Enhancers_Heart_20060,Enhancers_Heart_20064,Enhancers_Heart_20085,Enhancers_Heart_21078,Enhancers_Heart_21108,Enhancers_Heart_21114,Enhancers_Heart_21123,Enhancers_Heart_21125,Enhancers_Heart_21141,Enh…
												Enhancers_Heart_10078,Enhancers_Heart_104,Enhancers_Heart_10907,Enhancers_Heart_10909,Enhancers_Heart_10910,Enhancers_Heart_10929,Enhancers_Heart_10930,Enhancers_Heart_10931,Enhancers_Heart_11001,Enhancers_Heart_11906,Enhancers_Heart_11910,Enhancers_Heart_12372,Enhancers_Heart_129,Enhancers_Heart_13255,Enhancers_Heart_13265,Enhancers_Heart_13650,Enhancers_Heart_14213,Enhancers_Heart_14640,Enhance…
												Enhancers_Heart_10108,Enhancers_Heart_10572,Enhancers_Heart_10829,Enhancers_Heart_10833,Enhancers_Heart_10907,Enhancers_Heart_10909,Enhancers_Heart_10910,Enhancers_Heart_10929,Enhancers_Heart_10930,Enhancers_Heart_10931,Enhancers_Heart_11640,Enhancers_Heart_11641,Enhancers_Heart_12078,Enhancers_Heart_12127,Enhancers_Heart_14919,Enhancers_Heart_15409,Enhancers_Heart_15623,Enhancers_Heart_16438,Enh…
												Enhancers_Heart_11640,Enhancers_Heart_11641,Enhancers_Heart_14311,Enhancers_Heart_19615,Enhancers_Heart_19616,Enhancers_Heart_21078,Enhancers_Heart_21108,Enhancers_Heart_21114,Enhancers_Heart_21123,Enhancers_Heart_21125,Enhancers_Heart_21141,Enhancers_Heart_26195,Enhancers_Heart_26212,Enhancers_Heart_26213,Enhancers_Heart_26227,Enhancers_Heart_26239,Enhancers_Heart_26247,Enhancers_Heart_26248,Enh…

## Sheet: Heart enhancers down ancestral 
GO	Name	Binom Enrichment	# foreground regions	# expected regions	Binom BH p-value	Hyper Enrichment	# foreground genes	# expected genes	Hyper BH p-value	Genes	Regions
GO:0038066	p38MAPK cascade	3.69418	33	8.93297	2.56e-07	2.7026	12	4.44017	0.0267	Dusp1,Dusp10,Gm28047,Hgf,Lep,Map3k3,Per1,Phlpp1,Rell1,Sash1,Vegfa,Zfp36l1	Enhancers_Liver_13457,Enhancers_Liver_15754,Enhancers_Liver_19112,Enhancers_Liver_19143,Enhancers_Liver_19144,Enhancers_Liver_19145,Enhancers_Liver_19163,Enhancers_Liver_19164,Enhancers_Liver_19167,Enhancers_Liver_19178,Enhancers_Liver_19179,Enhancers_Liver_19183,Enhancers_Liver_19195,Enhancers_Liver_19200,Enhancers_Liver_19206,Enhancers_Liver_19245,Enhancers_Liver_3022,Enhancers_Liver_3046,Enhan…
GO:0032675	regulation of interleukin-6 production	2.85758	46	16.0975	3.19e-07	2.14581	28	13.0487	0.00464	Afap1l2,App,Arhgef2,Arrb1,Arrb2,Bank1,C1qtnf3,Cd24a,Cd74,F2r,Ghsr,Grk2,Hgf,Hmgb1,Hspd1,Ifng,Il17ra,Isl1,Laptm5,Lep,Ptafr,Ptpn6,Scimp,Syk,Tlr1,Tlr3,Tnfaip3,Tyrobp	Enhancers_Liver_10666,Enhancers_Liver_13540,Enhancers_Liver_13592,Enhancers_Liver_13593,Enhancers_Liver_161,Enhancers_Liver_162,Enhancers_Liver_163,Enhancers_Liver_22721,Enhancers_Liver_22724,Enhancers_Liver_23880,Enhancers_Liver_23894,Enhancers_Liver_23900,Enhancers_Liver_23921,Enhancers_Liver_23931,Enhancers_Liver_24918,Enhancers_Liver_29327,Enhancers_Liver_35612,Enhancers_Liver_35637,Enhancers…
GO:0030029	actin filament-based process	1.60285	174	108.557	3.26e-07	1.84198	113	61.3469	3.42e-07	Abl2,Ablim3,Abr,Actb,Actb,Actn1,Actn4,Akap13,Amot,Amotl2,Aqp1,Arf6,Arhgap18,Arhgap26,Arhgap28,Arhgef18,Arrb1,Asb2,Bcar1,Bcas3,Camk2d,Cdc42ep2,Coro1c,Coro2b,Csrp2,Cyria,Cyrib,Daam1,Daam2,Diaph3,Dlc1,Dstn,Dtnbp1,Ehbp1,Epb41l2,Epb41l3,Farp1,Fgr,Flnb,Fmnl2,Fmnl3,Fnbp1l,Frmd6,Gab1,Gata4,Gmfb,Hck,Iqgap2,Itgb3,Jam3,Kank1,Kit,Lima1,Lmod3,Lpin1,Lrp1,Map3k1,Mef2a,Mef2c,Mfn2,Mical2,Mrtfa,Mtss1,Myh10,Myl6,My…	Enhancers_Liver_10399,Enhancers_Liver_11069,Enhancers_Liver_11150,Enhancers_Liver_11678,Enhancers_Liver_11875,Enhancers_Liver_12076,Enhancers_Liver_12137,Enhancers_Liver_13413,Enhancers_Liver_13971,Enhancers_Liver_13972,Enhancers_Liver_14555,Enhancers_Liver_15717,Enhancers_Liver_15720,Enhancers_Liver_15814,Enhancers_Liver_16363,Enhancers_Liver_17200,Enhancers_Liver_17284,Enhancers_Liver_17296,Enh…
GO:0001817	regulation of cytokine production	1.67884	138	82.1998	1.27e-06	1.651	95	57.541	0.000192	Abl2,Acod1,Afap1l2,Akap12,App,Arg1,Arhgef2,Arrb1,Arrb2,Atp2b1,Bank1,Bcl6b,C1qtnf3,C3,Cadm1,Ccbe1,Ccm2l,Cd24a,Cd274,Cd276,Cd74,Cd81,Cd83,Cebpg,Clec7a,Crebbp,Cxcl17,Cyrib,Eif2ak2,Eif2ak3,Elf1,Errfi1,F2r,Fcgr3,Fermt1,Fgr,Flt1,Foxp1,Gata4,Ghsr,Grk2,Hgf,Hif1a,Hmgb1,Homer2,Hspd1,Ifng,Igf1,Il17ra,Il1r1,Il1r2,Il5ra,Isl1,Itgb6,Kit,Laptm5,Lep,Litaf,Lrp1,Lum,Map3k7,Nr4a3,P2ry2,Pde4b,Per1,Pik3r1,Plcb1,Ppara,…	Enhancers_Liver_10145,Enhancers_Liver_10179,Enhancers_Liver_10666,Enhancers_Liver_10789,Enhancers_Liver_11069,Enhancers_Liver_12076,Enhancers_Liver_12137,Enhancers_Liver_13457,Enhancers_Liver_13535,Enhancers_Liver_13540,Enhancers_Liver_13592,Enhancers_Liver_13593,Enhancers_Liver_15392,Enhancers_Liver_161,Enhancers_Liver_162,Enhancers_Liver_163,Enhancers_Liver_17267,Enhancers_Liver_17284,Enhancers…
GO:0002252	immune effector process	1.81443	106	58.4205	1.96e-06	1.47141	72	48.9325	0.0167	Abr,Adora3,Ahr,Apcs,App,Arg1,Arrb2,Azgp1,C3,C8a,C8b,C9,Cadm1,Cd180,Cd24a,Cd5l,Cd74,Cd81,Cdh17,Cebpg,Csf2rb2,Ctsc,Cyrib,Dnase1l3,Dusp10,Fcgr3,Fgr,Foxp1,Fut7,Gab2,Hlx,Hmgb1,Hprt,Hspd1,Ifng,Ighg1,Il1r1,Itgal,Itm2a,Kit,Kmt2e,Laptm5,Lep,Litaf,Lrp1,Map3k7,Nfkbid,Nfkbiz,Nr4a3,Pgc,Phb2,Plcl2,Prg2,Prkcd,Prkce,Ptafr,Ptpn6,Rac2,Rara,Sash3,Scimp,Sema4a,Stx7,Sucnr1,Syk,Tgfb3,Tlr3,Tnfaip3,Tsc1,Tusc2,Tyrobp,Vam…	Enhancers_Liver_10666,Enhancers_Liver_11069,Enhancers_Liver_13455,Enhancers_Liver_13457,Enhancers_Liver_13540,Enhancers_Liver_13592,Enhancers_Liver_13593,Enhancers_Liver_13971,Enhancers_Liver_13972,Enhancers_Liver_15392,Enhancers_Liver_161,Enhancers_Liver_162,Enhancers_Liver_163,Enhancers_Liver_17871,Enhancers_Liver_19715,Enhancers_Liver_20781,Enhancers_Liver_22721,Enhancers_Liver_22724,Enhancers…
GO:0001816	cytokine production	1.61183	150	93.0616	2.49e-06	1.60346	102	63.6123	0.000248	Abl2,Acod1,Adgrg1,Afap1l2,Akap12,App,Arg1,Arhgef2,Arrb1,Arrb2,Atp2b1,Bank1,Bcl6b,C1qtnf3,C3,Cadm1,Ccbe1,Ccm2l,Cd24a,Cd274,Cd276,Cd74,Cd81,Cd83,Cebpg,Clec7a,Crebbp,Cxcl17,Cyrib,Eif2ak2,Eif2ak3,Elf1,Errfi1,F2r,Fcgr3,Fermt1,Fgr,Flt1,Foxp1,Gata4,Ghsr,Grk2,Hgf,Hif1a,Hmgb1,Homer2,Hspd1,Ifng,Igf1,Il17ra,Il1r1,Il1r2,Il5ra,Isl1,Itgb6,Kit,Laptm5,Lcp2,Lep,Litaf,Lrp1,Lum,Maf,Map3k7,Nfatc3,Nr4a3,P2ry2,Pde4b,P…	Enhancers_Liver_10145,Enhancers_Liver_10179,Enhancers_Liver_10666,Enhancers_Liver_10789,Enhancers_Liver_11069,Enhancers_Liver_12076,Enhancers_Liver_12137,Enhancers_Liver_12294,Enhancers_Liver_13457,Enhancers_Liver_13535,Enhancers_Liver_13540,Enhancers_Liver_13592,Enhancers_Liver_13593,Enhancers_Liver_15392,Enhancers_Liver_161,Enhancers_Liver_162,Enhancers_Liver_163,Enhancers_Liver_17267,Enhancers…
GO:0002684	positive regulation of immune system process	1.58039	160	101.241	2.52e-06	1.49281	107	71.6771	0.0013	Abl2,Acod1,Actb,Actb,Adora3,Apcs,App,Arg1,Arid1a,Azgp1,Bcar1,Bmi1,C3,C8a,C8b,C9,Cadm1,Cd24a,Cd274,Cd276,Cd5l,Cd74,Cd79b,Cd81,Cd83,Cdkn1a,Clec7a,Ctsc,Cxcl17,Cyrib,Dgkz,Dusp10,Elf1,Fcgr3,Fgr,Flot2,Fos,Foxp1,Fut7,Fyb,Gab2,Gfi1b,Hlx,Hmgb1,Hspd1,Ifng,Igf1,Igfbp2,Ighg1,Il1r1,Il6st,Itgal,Itgb3,Jam3,Kit,Laptm5,Lcp2,Lep,Map3k7,Mef2c,Nck1,Nck1,Nfkbid,Nfkbiz,Ninj1,Nr4a3,Pde4b,Pecam1,Pgc,Phb2,Pik3r1,Plcl2,Pl…	Enhancers_Liver_10666,Enhancers_Liver_10789,Enhancers_Liver_11150,Enhancers_Liver_12294,Enhancers_Liver_13085,Enhancers_Liver_13592,Enhancers_Liver_13593,Enhancers_Liver_14107,Enhancers_Liver_15392,Enhancers_Liver_15717,Enhancers_Liver_15720,Enhancers_Liver_15769,Enhancers_Liver_15770,Enhancers_Liver_15772,Enhancers_Liver_15814,Enhancers_Liver_161,Enhancers_Liver_162,Enhancers_Liver_163,Enhancers…
GO:0030036	actin cytoskeleton organization	1.59767	154	96.3906	2.82e-06	1.86363	102	54.7319	7.8e-07	Abl2,Ablim3,Abr,Actb,Actb,Actn1,Actn4,Akap13,Amot,Amotl2,Aqp1,Arf6,Arhgap18,Arhgap26,Arhgap28,Arhgef18,Arrb1,Asb2,Bcar1,Bcas3,Cdc42ep2,Coro1c,Coro2b,Csrp2,Cyria,Cyrib,Daam1,Daam2,Diaph3,Dlc1,Dstn,Dtnbp1,Ehbp1,Epb41l2,Epb41l3,Farp1,Fgr,Flnb,Fmnl2,Fmnl3,Frmd6,Gab1,Gmfb,Hck,Iqgap2,Itgb3,Jam3,Kank1,Kit,Lima1,Lmod3,Lpin1,Lrp1,Map3k1,Mef2a,Mef2c,Mfn2,Mical2,Mrtfa,Mtss1,Myh10,Myoz2,Nck1,Nck1,Parva,Pdgfb…	Enhancers_Liver_10399,Enhancers_Liver_11069,Enhancers_Liver_11678,Enhancers_Liver_11875,Enhancers_Liver_12076,Enhancers_Liver_12137,Enhancers_Liver_13413,Enhancers_Liver_13971,Enhancers_Liver_13972,Enhancers_Liver_14555,Enhancers_Liver_15717,Enhancers_Liver_15720,Enhancers_Liver_15814,Enhancers_Liver_16363,Enhancers_Liver_17200,Enhancers_Liver_17284,Enhancers_Liver_17296,Enhancers_Liver_18477,Enh…
GO:0007015	actin filament organization	1.749	113	64.6085	3.53e-06	1.77496	69	38.8742	0.000335	Abl2,Actn1,Actn4,Arf6,Arhgap18,Arhgap28,Arhgef18,Arhgef2,Arrb1,Bcar1,Cdc42ep2,Coro1c,Coro2b,Ctnna1,Cyria,Cyrib,Daam2,Diaph3,Dlc1,Dstn,Elmo2,Ghsr,Gmfb,Iqgap2,Kank1,Lima1,Lmod3,Map3k1,Mical2,Mical3,Mprip,Mtss1,Myh10,Myo1b,Myo5b,Nck1,Nck1,Pdlim1,Pecam1,Pfn2,Pik3r1,Plek,Ppargc1b,Ppp1r9a,Prkcd,Prkce,Pxn,Rac2,Rhobtb1,Rhobtb3,Rhod,Sorbs1,Sorbs2,Specc1l,Sptbn1,Ssh1,Ssh3,Synpo,Synpo2,Tacr1,Tgfb3,Tjp1,Tmsb…	Enhancers_Liver_11678,Enhancers_Liver_12076,Enhancers_Liver_12137,Enhancers_Liver_12988,Enhancers_Liver_13004,Enhancers_Liver_13413,Enhancers_Liver_15814,Enhancers_Liver_17200,Enhancers_Liver_18477,Enhancers_Liver_19245,Enhancers_Liver_19263,Enhancers_Liver_19282,Enhancers_Liver_19715,Enhancers_Liver_20023,Enhancers_Liver_20575,Enhancers_Liver_23426,Enhancers_Liver_23880,Enhancers_Liver_23894,Enh…
GO:0032868	response to insulin	2.19268	63	28.732	3.9e-06	1.71911	31	18.0325	0.0372	Atp2b1,Cry1,Foxo1,Ghsr,Gnai2,Grk2,Insig1,Insr,Kank1,Kat2b,Lep,Lmbrd1,Lpin1,Mfn2,Nck1,Nck1,Pik3r1,Pip4k2a,Ppara,Prkcd,Pten,Rab12,Rab31,Rab8b,Sesn2,Slc39a14,Sorbs1,Tsc1,Vamp2,Vps13c,Zfp36l1	Enhancers_Liver_10179,Enhancers_Liver_13455,Enhancers_Liver_13457,Enhancers_Liver_17284,Enhancers_Liver_17296,Enhancers_Liver_19112,Enhancers_Liver_19143,Enhancers_Liver_19144,Enhancers_Liver_19145,Enhancers_Liver_19163,Enhancers_Liver_19164,Enhancers_Liver_19167,Enhancers_Liver_19178,Enhancers_Liver_19179,Enhancers_Liver_19183,Enhancers_Liver_19195,Enhancers_Liver_19200,Enhancers_Liver_19206,Enh…
GO:0001775	cell activation	1.49649	187	124.959	5.51e-06	1.51352	127	83.9102	0.000248	Abl2,Abr,Actb,Actb,Adora2a,Adora3,Ahr,App,Arg1,Arid1a,Bank1,Bid,Bmi1,Cd180,Cd24a,Cd274,Cd276,Cd74,Cd79b,Cd81,Cd83,Cdh17,Cdkn1a,Chd7,Crip3,Ctsc,Cyp26b1,Cyrib,Ddr2,Dnase1l3,Dtx1,Dusp10,Elf4,F2r,Fcgr3,Fgr,Flot2,Foxn1,Foxp1,Fut7,Fzd8,Fzd9,Gab2,Gnrh1,Hectd1,Hlx,Hmgb1,Hprt,Hspd1,Ifng,Igf1,Igfbp2,Ighg1,Il17ra,Il2rb,Il6st,Itgal,Itgb3,Itgb6,Itm2a,Kat7,Kit,Klf5,Kmt2e,Laptm5,Lcp2,Lep,Lrp1,Mef2c,Myc,Nck1,Nck…	Enhancers_Liver_10666,Enhancers_Liver_10789,Enhancers_Liver_11069,Enhancers_Liver_11150,Enhancers_Liver_11678,Enhancers_Liver_12294,Enhancers_Liver_12988,Enhancers_Liver_13455,Enhancers_Liver_13457,Enhancers_Liver_13971,Enhancers_Liver_13972,Enhancers_Liver_14107,Enhancers_Liver_14137,Enhancers_Liver_14138,Enhancers_Liver_15123,Enhancers_Liver_15392,Enhancers_Liver_15717,Enhancers_Liver_15720,Enh…
GO:0032869	cellular response to insulin stimulus	2.26366	55	24.2969	7.47e-06	1.82755	26	14.2267	0.0356	Atp2b1,Foxo1,Ghsr,Gnai2,Grk2,Insig1,Insr,Kank1,Kat2b,Lep,Lmbrd1,Lpin1,Mfn2,Nck1,Nck1,Pik3r1,Pip4k2a,Prkcd,Pten,Rab12,Rab31,Rab8b,Slc39a14,Sorbs1,Vamp2,Zfp36l1	Enhancers_Liver_10179,Enhancers_Liver_13455,Enhancers_Liver_13457,Enhancers_Liver_17284,Enhancers_Liver_17296,Enhancers_Liver_19112,Enhancers_Liver_19143,Enhancers_Liver_19144,Enhancers_Liver_19145,Enhancers_Liver_19163,Enhancers_Liver_19164,Enhancers_Liver_19167,Enhancers_Liver_19178,Enhancers_Liver_19179,Enhancers_Liver_19183,Enhancers_Liver_19195,Enhancers_Liver_19200,Enhancers_Liver_19206,Enh…
GO:0019752	carboxylic acid metabolic process	1.5763	147	93.2562	8.2e-06	1.31533	100	76.0267	0.0437	Abcc2,Abhd2,Acaa2,Acadsb,Agxt2,Ahcy,Aldh18a1,Aldh1l1,Aldh8a1,Amacr,App,Arg1,Asah2,Ass1,Auh,Bckdhb,Bhmt,Bhmt2,Blmh,C3,Cbr4,Cd74,Cps1,Csad,Cyp26a1,Cyp26b1,Cyp4a12a,Ddah1,Dld,Echdc2,Eif2ak3,Eno4,Erlin1,Fa2h,Fabp2,Fbp1,Fpgs,Gars,Ggt1,Ghsr,Gldc,Gls2,Glul,Gne,Gstm4,Gstm4,Gsto2,Haao,Hao1,Hif1a,Idh1,Idnk,Ido2,Ifng,Igf1,Insig1,Insr,Kit,Lep,Lipe,Lpin1,Me3,Mgll,Mgst2,Mgst3,Mid1ip1,Mthfd1l,Myc,Nars2,Nr4a3,Nu…	Enhancers_Liver_10666,Enhancers_Liver_11064,Enhancers_Liver_11065,Enhancers_Liver_11069,Enhancers_Liver_11128,Enhancers_Liver_11130,Enhancers_Liver_13047,Enhancers_Liver_13085,Enhancers_Liver_13996,Enhancers_Liver_1694,Enhancers_Liver_1695,Enhancers_Liver_17284,Enhancers_Liver_17296,Enhancers_Liver_1739,Enhancers_Liver_1741,Enhancers_Liver_17630,Enhancers_Liver_18781,Enhancers_Liver_18789,Enhance…
GO:0001819	positive regulation of cytokine production	1.78271	99	55.5335	8.25e-06	1.74529	65	37.2431	0.000747	Abl2,Afap1l2,Akap12,App,Arhgef2,C1qtnf3,C3,Cadm1,Ccbe1,Ccm2l,Cd274,Cd276,Cd74,Cd81,Cd83,Cebpg,Clec7a,Cxcl17,Cyrib,Eif2ak2,Eif2ak3,F2r,Fcgr3,Fermt1,Fgr,Foxp1,Gata4,Grk2,Hgf,Hif1a,Hmgb1,Hspd1,Ifng,Il17ra,Il1r1,Isl1,Kit,Laptm5,Lep,Lrp1,Lum,Map3k7,Nr4a3,P2ry2,Pde4b,Pik3r1,Plcb1,Prg2,Ptafr,Rara,Runx1,Sash3,Scamp5,Scimp,Sptbn1,Syk,Tbk1,Tlr1,Tlr3,Tmed10,Tusc2,Txk,Tyrobp,Vtcn1,Zfpm1	Enhancers_Liver_10145,Enhancers_Liver_10666,Enhancers_Liver_10789,Enhancers_Liver_11069,Enhancers_Liver_12076,Enhancers_Liver_12137,Enhancers_Liver_13592,Enhancers_Liver_13593,Enhancers_Liver_15392,Enhancers_Liver_161,Enhancers_Liver_162,Enhancers_Liver_163,Enhancers_Liver_18781,Enhancers_Liver_18789,Enhancers_Liver_18807,Enhancers_Liver_19664,Enhancers_Liver_19682,Enhancers_Liver_22235,Enhancers…
GO:0045321	leukocyte activation	1.498	169	112.817	2.04e-05	1.51624	115	75.8454	0.000447	Abl2,Abr,Actb,Actb,Adora2a,Adora3,Ahr,App,Arg1,Arid1a,Bank1,Bid,Bmi1,Cd180,Cd24a,Cd274,Cd276,Cd74,Cd79b,Cd81,Cd83,Cdh17,Cdkn1a,Chd7,Crip3,Ctsc,Cyp26b1,Cyrib,Dnase1l3,Dtx1,Dusp10,Elf4,Fcgr3,Fgr,Flot2,Foxn1,Foxp1,Fut7,Fzd8,Fzd9,Gab2,Gnrh1,Hectd1,Hlx,Hmgb1,Hprt,Hspd1,Ifng,Igf1,Igfbp2,Ighg1,Il2rb,Il6st,Itgal,Itgb6,Itm2a,Kat7,Kit,Kmt2e,Laptm5,Lcp2,Lep,Mef2c,Myc,Nck1,Nck1,Nfatc3,Nfkbid,Nfkbiz,Nr4a3,Pde…	Enhancers_Liver_10666,Enhancers_Liver_10789,Enhancers_Liver_11150,Enhancers_Liver_12294,Enhancers_Liver_12988,Enhancers_Liver_13455,Enhancers_Liver_13457,Enhancers_Liver_13971,Enhancers_Liver_13972,Enhancers_Liver_14107,Enhancers_Liver_14137,Enhancers_Liver_14138,Enhancers_Liver_15123,Enhancers_Liver_15392,Enhancers_Liver_15769,Enhancers_Liver_15770,Enhancers_Liver_15772,Enhancers_Liver_161,Enhan…
GO:0071375	cellular response to peptide hormone stimulus	2.05037	63	30.7262	2.11e-05	1.75438	31	17.6701	0.0305	Atp2b1,Bcar1,Foxo1,Ghsr,Gnai2,Grk2,Igf1,Insig1,Insr,Kank1,Kat2b,Lep,Lmbrd1,Lpin1,Mfn2,Nck1,Nck1,Nfe2l2,Nr4a3,Pik3r1,Pip4k2a,Plcb1,Prkcd,Pten,Rab12,Rab31,Rab8b,Slc39a14,Sorbs1,Vamp2,Zfp36l1	Enhancers_Liver_10179,Enhancers_Liver_13455,Enhancers_Liver_13457,Enhancers_Liver_17284,Enhancers_Liver_17296,Enhancers_Liver_19112,Enhancers_Liver_19143,Enhancers_Liver_19144,Enhancers_Liver_19145,Enhancers_Liver_19163,Enhancers_Liver_19164,Enhancers_Liver_19167,Enhancers_Liver_19178,Enhancers_Liver_19179,Enhancers_Liver_19183,Enhancers_Liver_19195,Enhancers_Liver_19200,Enhancers_Liver_19206,Enh…
GO:0046649	lymphocyte activation	1.54159	148	96.0045	2.24e-05	1.57879	99	62.7061	0.000419	Abl2,Actb,Actb,Adora2a,Ahr,Arg1,Arid1a,Bank1,Bid,Bmi1,Cd180,Cd24a,Cd274,Cd276,Cd74,Cd79b,Cd81,Cd83,Cdh17,Cdkn1a,Chd7,Crip3,Cyp26b1,Cyrib,Dtx1,Dusp10,Elf4,Fcgr3,Fgr,Flot2,Foxn1,Foxp1,Fut7,Fzd8,Fzd9,Gnrh1,Hectd1,Hlx,Hmgb1,Hprt,Hspd1,Ifng,Igf1,Igfbp2,Ighg1,Il2rb,Il6st,Itgal,Itm2a,Kat7,Kit,Laptm5,Lep,Mef2c,Myc,Nck1,Nck1,Nfatc3,Nfkbid,Nfkbiz,Pde5a,Phb2,Pik3r1,Plcl2,Ppp3ca,Prdm1,Prex1,Prkcd,Prr7,Pten,P…	Enhancers_Liver_10666,Enhancers_Liver_10789,Enhancers_Liver_11150,Enhancers_Liver_12988,Enhancers_Liver_14107,Enhancers_Liver_14137,Enhancers_Liver_14138,Enhancers_Liver_15123,Enhancers_Liver_15392,Enhancers_Liver_15769,Enhancers_Liver_15770,Enhancers_Liver_15772,Enhancers_Liver_161,Enhancers_Liver_162,Enhancers_Liver_163,Enhancers_Liver_17871,Enhancers_Liver_18183,Enhancers_Liver_1835,Enhancers_…
GO:0031664	regulation of lipopolysaccharide-mediated signaling pathway	4.22478	19	4.49728	2.83e-05	3.86246	7	1.81232	0.0294	Acod1,Cd180,Prdm1,Sash1,Scimp,Tnfaip3,Trib1	Enhancers_Liver_13592,Enhancers_Liver_13593,Enhancers_Liver_24345,Enhancers_Liver_24347,Enhancers_Liver_24351,Enhancers_Liver_24359,Enhancers_Liver_24386,Enhancers_Liver_24387,Enhancers_Liver_28515,Enhancers_Liver_28516,Enhancers_Liver_30664,Enhancers_Liver_30675,Enhancers_Liver_6546,Enhancers_Liver_6565,Enhancers_Liver_6567,Enhancers_Liver_6923,Enhancers_Liver_6945,Enhancers_Liver_6964,Enhancers…
GO:0042110	T cell activation	1.65832	111	66.9353	2.91e-05	1.69595	71	41.8645	0.000747	Abl2,Actb,Actb,Adora2a,Arg1,Arid1a,Bid,Bmi1,Cd24a,Cd274,Cd276,Cd74,Cd81,Cd83,Chd7,Crip3,Cyp26b1,Cyrib,Dtx1,Dusp10,Elf4,Flot2,Foxn1,Foxp1,Fut7,Fzd8,Gnrh1,Hlx,Hmgb1,Hspd1,Ifng,Igf1,Igfbp2,Il6st,Itgal,Kit,Laptm5,Lep,Myc,Nck1,Nck1,Nfatc3,Nfkbid,Nfkbiz,Pde5a,Ppp3ca,Prdm1,Prex1,Prr7,Pten,Ptpn6,Rac2,Rara,Ripor2,Runx1,Sash3,Sema4a,Sh3rf1,Smarcc2,Sos2,Syk,Tnfrsf21,Tsc1,Tspan32,Txk,Vcam1,Vtcn1,Zbtb16,Zfp36…	Enhancers_Liver_10666,Enhancers_Liver_11150,Enhancers_Liver_14107,Enhancers_Liver_14137,Enhancers_Liver_14138,Enhancers_Liver_15392,Enhancers_Liver_161,Enhancers_Liver_162,Enhancers_Liver_163,Enhancers_Liver_1835,Enhancers_Liver_1842,Enhancers_Liver_18498,Enhancers_Liver_19112,Enhancers_Liver_19143,Enhancers_Liver_19144,Enhancers_Liver_19145,Enhancers_Liver_19163,Enhancers_Liver_19164,Enhancers_L…
GO:1901653	cellular response to peptide	1.90586	72	37.7781	3.32e-05	1.75461	38	21.6572	0.0149	App,Arhgef2,Atp2b1,Bcar1,Cacna2d1,Fcgr3,Foxo1,Ghsr,Gnai2,Grk2,Igf1,Insig1,Insr,Kank1,Kat2b,Lep,Lmbrd1,Lpin1,Lrp1,Mfn2,Nck1,Nck1,Nfe2l2,Nr4a3,Pik3r1,Pip4k2a,Plcb1,Prkcd,Pten,Rab12,Rab31,Rab8b,Slc39a14,Smpd3,Sorbs1,Vamp2,Vcam1,Zfp36l1	Enhancers_Liver_10179,Enhancers_Liver_11069,Enhancers_Liver_13455,Enhancers_Liver_13457,Enhancers_Liver_17284,Enhancers_Liver_17296,Enhancers_Liver_19112,Enhancers_Liver_19143,Enhancers_Liver_19144,Enhancers_Liver_19145,Enhancers_Liver_19163,Enhancers_Liver_19164,Enhancers_Liver_19167,Enhancers_Liver_19178,Enhancers_Liver_19179,Enhancers_Liver_19183,Enhancers_Liver_19195,Enhancers_Liver_19200,Enh…
GO:0150115	cell-substrate junction organization	2.50865	40	15.9449	3.32e-05	2.47738	22	8.88035	0.00344	Actn1,Arf6,Bcas3,Coro1c,Coro2b,Dlc1,Itgb3,Itgb4,Kdr,Lims1,Lrp1,Mapre2,Pik3r1,Pten,Pxn,Rab8b,Rhod,Sorbs1,Tns1,Tsc1,Vegfa,Whamm	Enhancers_Liver_11069,Enhancers_Liver_14555,Enhancers_Liver_15717,Enhancers_Liver_15720,Enhancers_Liver_16434,Enhancers_Liver_18477,Enhancers_Liver_19245,Enhancers_Liver_19263,Enhancers_Liver_19282,Enhancers_Liver_1949,Enhancers_Liver_24277,Enhancers_Liver_24333,Enhancers_Liver_37837,Enhancers_Liver_37842,Enhancers_Liver_37854,Enhancers_Liver_40520,Enhancers_Liver_40525,Enhancers_Liver_44543,Enha…
GO:0043255	regulation of carbohydrate biosynthetic process	2.59299	36	13.8836	4.04e-05	2.45236	22	8.97096	0.0039	C1qtnf3,Cry1,Dyrk2,Fbp1,Foxo1,Hif1a,Igf1,Insr,Kat2b,Lep,Mas1,Nr3c1,P2ry6,Pdgfb,Plek,Ppara,Ppp1r3a,Ppp1r3b,Ptafr,Sesn2,Smpd3,Sorbs1	Enhancers_Liver_10666,Enhancers_Liver_11678,Enhancers_Liver_18781,Enhancers_Liver_18789,Enhancers_Liver_18807,Enhancers_Liver_23093,Enhancers_Liver_29327,Enhancers_Liver_31697,Enhancers_Liver_31703,Enhancers_Liver_32125,Enhancers_Liver_36658,Enhancers_Liver_38160,Enhancers_Liver_41181,Enhancers_Liver_41668,Enhancers_Liver_41670,Enhancers_Liver_41672,Enhancers_Liver_41681,Enhancers_Liver_45000,Enh…
GO:0002443	leukocyte mediated immunity	2.00115	62	30.9821	4.69e-05	1.5988	41	25.6443	0.0348	Abr,Adora3,Ahr,Arg1,Arrb2,Azgp1,C3,Cadm1,Cd24a,Cd74,Cd81,Cebpg,Csf2rb2,Ctsc,Cyrib,Dnase1l3,Fcgr3,Fgr,Fut7,Gab2,Hmgb1,Hprt,Hspd1,Ifng,Ighg1,Il1r1,Kit,Kmt2e,Lep,Map3k7,Prkcd,Ptafr,Ptpn6,Rac2,Sash3,Scimp,Stx7,Syk,Tlr3,Tusc2,Tyrobp	Enhancers_Liver_10666,Enhancers_Liver_13540,Enhancers_Liver_13592,Enhancers_Liver_13593,Enhancers_Liver_13971,Enhancers_Liver_13972,Enhancers_Liver_161,Enhancers_Liver_162,Enhancers_Liver_163,Enhancers_Liver_17871,Enhancers_Liver_20781,Enhancers_Liver_22721,Enhancers_Liver_22724,Enhancers_Liver_24966,Enhancers_Liver_26133,Enhancers_Liver_26136,Enhancers_Liver_30925,Enhancers_Liver_30926,Enhancers…
GO:0032755	positive regulation of interleukin-6 production	2.82919	30	10.6037	5.49e-05	2.09096	18	8.6085	0.0372	App,Arhgef2,Cd74,F2r,Grk2,Hmgb1,Hspd1,Ifng,Il17ra,Isl1,Laptm5,Lep,Ptafr,Scimp,Syk,Tlr1,Tlr3,Tyrobp	Enhancers_Liver_10666,Enhancers_Liver_13592,Enhancers_Liver_13593,Enhancers_Liver_161,Enhancers_Liver_162,Enhancers_Liver_163,Enhancers_Liver_22721,Enhancers_Liver_22724,Enhancers_Liver_23880,Enhancers_Liver_23894,Enhancers_Liver_23900,Enhancers_Liver_23921,Enhancers_Liver_23931,Enhancers_Liver_24918,Enhancers_Liver_35612,Enhancers_Liver_35637,Enhancers_Liver_41933,Enhancers_Liver_41934,Enhancers…
GO:0031098	stress-activated protein kinase signaling cascade	1.81305	78	43.0215	5.98e-05	1.77115	39	22.0196	0.0121	Aida,App,Dact1,Dusp1,Dusp10,Dusp16,Egfr,Eif2ak2,Errfi1,Fcgr3,Fktn,Foxo1,Gm28047,Hgf,Hipk2,Hmgb1,Kat7,Lep,Map3k1,Map3k3,Map3k5,Map3k7,Mturn,Per1,Phlpp1,Plcb1,Rell1,Sash1,Scimp,Sh3rf1,Spag9,Taok3,Tlr3,Tpd52l1,Traf4,Trib1,Usp25,Vegfa,Zfp36l1	Enhancers_Liver_11669,Enhancers_Liver_13457,Enhancers_Liver_13592,Enhancers_Liver_13593,Enhancers_Liver_14123,Enhancers_Liver_15006,Enhancers_Liver_15123,Enhancers_Liver_15754,Enhancers_Liver_161,Enhancers_Liver_162,Enhancers_Liver_163,Enhancers_Liver_18640,Enhancers_Liver_18688,Enhancers_Liver_18689,Enhancers_Liver_18690,Enhancers_Liver_19112,Enhancers_Liver_19143,Enhancers_Liver_19144,Enhancers…
GO:0044283	small molecule biosynthetic process	1.64772	106	64.3315	6.7e-05	1.40608	66	46.939	0.0469	Abca2,Abhd2,Agxt2,Aldh18a1,Aldh8a1,Amacr,Asah2,Ass1,Bhmt,Bhmt2,C1qtnf3,Cbr4,Cd74,Chst15,Coq8a,Cry1,Csad,Cyp4a12a,Dhcr7,Dkk3,Erlin1,Fa2h,Fbp1,Foxo1,Ggt1,Gls2,Glul,Gstm4,Gstm4,Haao,Hao1,Hif1a,Hprt,Ifng,Insig1,Kat2b,Lep,Mas1,Mgll,Mgst2,Mgst3,Mid1ip1,Moxd1,Mthfd1l,Nr3c1,Otc,P2ry6,Pcx,Plek,Ppara,Ppargc1a,Prkag1,Ptafr,Ptges2,Qki,Rbp1,Scp2,Sec14l2,Sesn2,Shmt2,Slc39a14,Spr,Srebf1,Syk,Ugdh,Upb1	Enhancers_Liver_10666,Enhancers_Liver_11064,Enhancers_Liver_11065,Enhancers_Liver_11069,Enhancers_Liver_11128,Enhancers_Liver_11130,Enhancers_Liver_11282,Enhancers_Liver_11283,Enhancers_Liver_11678,Enhancers_Liver_13085,Enhancers_Liver_18781,Enhancers_Liver_18789,Enhancers_Liver_18807,Enhancers_Liver_22721,Enhancers_Liver_22724,Enhancers_Liver_23093,Enhancers_Liver_23765,Enhancers_Liver_27816,Enh…
[truncated: 74 more rows]
