# Supplementary material for: Phylogenetic modeling of enhancer shifts in African mole-rats reveals regulatory changes associated with tissue-specific traits
Source: HighWire-hosted journal article supplement (doi:10.1101/gr.277715.123), 2023-08-25
Supplement: Supplemental_Table_S7.xlsx [file Supplemental_Table_S7.xlsx]

## Sheet: Heart P. Enhancers gains nmrdmr
Supplemental Table S7. Gene ontology enrichments (TOP 100) for primed enhancers with gain and losses of activity as defined by parsimony in the ancestral mole-rat branch. Columns as in Table S4. Note that no significant enrichment was found for liver primed enhancer losses.
GO	Name	Binom Enrichment	# foreground regions	# expected regions	Binom BH p-value	Hyper Enrichment	# foreground genes	# expected genes	Hyper BH p-value	Genes	Gene_IDS	Regions
GO:0048732	gland development	2.32828	31	13.3145	0.00703	2.74055	22	8.02759	0.00655	Arhgap35,Arhgap5,Bmpr1a,Cdkn1c,Ext1,Gpat4,Igf1r,Itpr1,Jarid2,Lbh,Mad1l1,Med1,Nr3c1,Nr5a1,Ntn1,Pbx1,Psen2,Ptcd2,Rhbdd3,Runx1,Sp3,Tgfbr3	ENSFDAG00000000295,ENSFDAG00000002781,ENSFDAG00000002987,ENSFDAG00000006186,ENSFDAG00000006381,ENSFDAG00000006634,ENSFDAG00000007377,ENSFDAG00000009085,ENSFDAG00000009167,ENSFDAG00000009367,ENSFDAG00000012280,ENSFDAG00000012422,ENSFDAG00000012650,ENSFDAG00000014163,ENSFDAG00000015595,ENSFDAG00000016553,ENSFDAG00000017799,ENSFDAG00000018008,ENSFDAG00000018454,ENSFDAG00000018461,ENSFDAG00000019034,…	Primed-enhancers_Heart_11074,Primed-enhancers_Heart_11075,Primed-enhancers_Heart_13602,Primed-enhancers_Heart_14751,Primed-enhancers_Heart_16141,Primed-enhancers_Heart_18465,Primed-enhancers_Heart_21994,Primed-enhancers_Heart_24092,Primed-enhancers_Heart_25660,Primed-enhancers_Heart_29672,Primed-enhancers_Heart_30302,Primed-enhancers_Heart_3190,Primed-enhancers_Heart_3773,Primed-enhancers_Heart_4…
GO:0030099	myeloid cell differentiation	1.94055	33	17.0055	0.0348	2.35532	30	12.7371	0.00517	Actn1,Batf,Cdkn1c,Dll1,Gabpa,Gsk3b,Il15,Inpp4b,Itgb6,Itpkb,Jak2,Kcnq1,Klf10,Med1,Mef2c,Mitf,Nfatc1,Pik3r1,Plcb1,Psen2,Rassf2,Rbfox2,Runx1,Sp3,Tgfbr3,Tmem178,Trib1,Ubash3b,Zbtb16,Zfp36l1	ENSFDAG00000002781,ENSFDAG00000006204,ENSFDAG00000006634,ENSFDAG00000006848,ENSFDAG00000007714,ENSFDAG00000007799,ENSFDAG00000008006,ENSFDAG00000008095,ENSFDAG00000008332,ENSFDAG00000008970,ENSFDAG00000009085,ENSFDAG00000009688,ENSFDAG00000010085,ENSFDAG00000010623,ENSFDAG00000010725,ENSFDAG00000012280,ENSFDAG00000013725,ENSFDAG00000014165,ENSFDAG00000014727,ENSFDAG00000014938,ENSFDAG00000014978,…	Primed-enhancers_Heart_11574,Primed-enhancers_Heart_11586,Primed-enhancers_Heart_11916,Primed-enhancers_Heart_14433,Primed-enhancers_Heart_14803,Primed-enhancers_Heart_18272,Primed-enhancers_Heart_18696,Primed-enhancers_Heart_19207,Primed-enhancers_Heart_21358,Primed-enhancers_Heart_21789,Primed-enhancers_Heart_21994,Primed-enhancers_Heart_22626,Primed-enhancers_Heart_24338,Primed-enhancers_Heart…
GO:0043242	negative regulation of protein-containing complex disassembly	3.05562	13	4.25446	0.0353	3.42569	11	3.21104	0.048	Atxn7,Capzb,Clasp1,Map1b,Mid1ip1,Rubcn,Scaf4,Sptbn1,Tmem39a,Tpx2,Vill	ENSFDAG00000000042,ENSFDAG00000003511,ENSFDAG00000005883,ENSFDAG00000007432,ENSFDAG00000008360,ENSFDAG00000008435,ENSFDAG00000009775,ENSFDAG00000012205,ENSFDAG00000017317,ENSFDAG00000017780,ENSFDAG00000021274	Primed-enhancers_Heart_14751,Primed-enhancers_Heart_1528,Primed-enhancers_Heart_15408,Primed-enhancers_Heart_1963,Primed-enhancers_Heart_1968,Primed-enhancers_Heart_21130,Primed-enhancers_Heart_21381,Primed-enhancers_Heart_21883,Primed-enhancers_Heart_38700,Primed-enhancers_Heart_55590,Primed-enhancers_Heart_55779,Primed-enhancers_Heart_55790,Primed-enhancers_Heart_6950
GO:0090100	positive regulation of transmembrane receptor protein serine/threonine kinase signaling pathway	2.58879	16	6.18049	0.0411	3.17302	12	3.78189	0.0483	Acvr1,Bmpr1a,Cdkn1c,Crebbp,Gata4,Gdf10,Hipk2,Jak2,Stk11,Tgfb2,Tgfbr3,Zc3h3	ENSFDAG00000000501,ENSFDAG00000002781,ENSFDAG00000005173,ENSFDAG00000005671,ENSFDAG00000007195,ENSFDAG00000009085,ENSFDAG00000010085,ENSFDAG00000012435,ENSFDAG00000013552,ENSFDAG00000014534,ENSFDAG00000015595,ENSFDAG00000017737	Primed-enhancers_Heart_16099,Primed-enhancers_Heart_16141,Primed-enhancers_Heart_16625,Primed-enhancers_Heart_19096,Primed-enhancers_Heart_19101,Primed-enhancers_Heart_20260,Primed-enhancers_Heart_27547,Primed-enhancers_Heart_29894,Primed-enhancers_Heart_3631,Primed-enhancers_Heart_41218,Primed-enhancers_Heart_41227,Primed-enhancers_Heart_41228,Primed-enhancers_Heart_43541,Primed-enhancers_Heart_…

## Sheet: Heart P. Enhancers losses nmrdm
GO	Name	Binom Enrichment	# foreground regions	# expected regions	Binom BH p-value	Hyper Enrichment	# foreground genes	# expected genes	Hyper BH p-value	Genes	Gene_IDs	Regions
GO:0007178	transmembrane receptor protein serine/threonine kinase signaling pathway	2.17517	67	30.8022	1.03e-05	2.49002	47	18.8753	2.23e-06	Acvr1,Acvr1c,Acvr2a,Axin1,Bmp4,Bmp7,Bmper,Cdkn1c,Chrdl2,Crb2,Crebbp,Crim1,Dlx3,Ep300,Ext1,Fermt2,Fos,Glg1,Grem1,Hipk2,Hspa5,Itgb6,Lrp1,Map3k1,Map3k7,Nlk,Notch2,Nrep,Pakap,Ror2,Sirt1,Skor1,Smad1,Smad3,Smad4,Smad5,Smad7,Smurf1,Src,Tgfbr2,Trps1,Ube2o,Veph1,Wfikkn2,Xbp1,Zeb2,Zmiz1	ENSFDAG00000000501,ENSFDAG00000001117,ENSFDAG00000002571,ENSFDAG00000003167,ENSFDAG00000003601,ENSFDAG00000003824,ENSFDAG00000003851,ENSFDAG00000004474,ENSFDAG00000004686,ENSFDAG00000006607,ENSFDAG00000007144,ENSFDAG00000007193,ENSFDAG00000007195,ENSFDAG00000007494,ENSFDAG00000007714,ENSFDAG00000008064,ENSFDAG00000008134,ENSFDAG00000009044,ENSFDAG00000009085,ENSFDAG00000009892,ENSFDAG00000010131,…	Primed-enhancers_Heart_11907,Primed-enhancers_Heart_13993,Primed-enhancers_Heart_14097,Primed-enhancers_Heart_15037,Primed-enhancers_Heart_15810,Primed-enhancers_Heart_16223,Primed-enhancers_Heart_16230,Primed-enhancers_Heart_16231,Primed-enhancers_Heart_18413,Primed-enhancers_Heart_18461,Primed-enhancers_Heart_18491,Primed-enhancers_Heart_18506,Primed-enhancers_Heart_18509,Primed-enhancers_Heart…
GO:0030509	BMP signaling pathway	2.81917	40	14.1886	1.03e-05	2.64824	22	8.30741	0.0012	Acvr1,Acvr2a,Bmp4,Bmp7,Bmper,Chrdl2,Crb2,Crim1,Dlx3,Ext1,Grem1,Hipk2,Notch2,Ror2,Skor1,Smad1,Smad3,Smad4,Smad5,Smad7,Smurf1,Ube2o	ENSFDAG00000000501,ENSFDAG00000001117,ENSFDAG00000003601,ENSFDAG00000003851,ENSFDAG00000004474,ENSFDAG00000007193,ENSFDAG00000007195,ENSFDAG00000008134,ENSFDAG00000009044,ENSFDAG00000010213,ENSFDAG00000012174,ENSFDAG00000012650,ENSFDAG00000013284,ENSFDAG00000013494,ENSFDAG00000014357,ENSFDAG00000014421,ENSFDAG00000014859,ENSFDAG00000016306,ENSFDAG00000016851,ENSFDAG00000017680,ENSFDAG00000018554,…	Primed-enhancers_Heart_13993,Primed-enhancers_Heart_14097,Primed-enhancers_Heart_16230,Primed-enhancers_Heart_16231,Primed-enhancers_Heart_18461,Primed-enhancers_Heart_18491,Primed-enhancers_Heart_18506,Primed-enhancers_Heart_18509,Primed-enhancers_Heart_18511,Primed-enhancers_Heart_18517,Primed-enhancers_Heart_18520,Primed-enhancers_Heart_24211,Primed-enhancers_Heart_24212,Primed-enhancers_Heart…
GO:0014033	neural crest cell differentiation	8.58134	13	1.51491	1.03e-05	6.80579	5	0.734669	0.00933	Ext1,Mef2c,Six1,Smad4,Wnt10a	ENSFDAG00000005005,ENSFDAG00000008134,ENSFDAG00000008970,ENSFDAG00000010263,ENSFDAG00000012650	Primed-enhancers_Heart_11338,Primed-enhancers_Heart_1168,Primed-enhancers_Heart_14423,Primed-enhancers_Heart_14427,Primed-enhancers_Heart_14431,Primed-enhancers_Heart_18461,Primed-enhancers_Heart_18491,Primed-enhancers_Heart_18506,Primed-enhancers_Heart_18509,Primed-enhancers_Heart_18511,Primed-enhancers_Heart_18517,Primed-enhancers_Heart_18520,Primed-enhancers_Heart_26365
GO:0048733	sebaceous gland development	10.4448	10	0.957411	4.94e-05	7.07802	4	0.56513	0.0211	Ext1,Smad4,Tfap2c,Wnt10a	ENSFDAG00000008134,ENSFDAG00000008613,ENSFDAG00000010263,ENSFDAG00000012650	Primed-enhancers_Heart_1168,Primed-enhancers_Heart_18461,Primed-enhancers_Heart_18491,Primed-enhancers_Heart_18506,Primed-enhancers_Heart_18509,Primed-enhancers_Heart_18511,Primed-enhancers_Heart_18517,Primed-enhancers_Heart_18520,Primed-enhancers_Heart_26365,Primed-enhancers_Heart_32868
GO:0071847	TNFSF11-mediated signaling pathway	12.7987	9	0.703195	4.94e-05	8.84752	3	0.339078	0.0318	Cldn18,Ext1,Tnfsf11	ENSFDAG00000010109,ENSFDAG00000012650,ENSFDAG00000016943	Primed-enhancers_Heart_17137,Primed-enhancers_Heart_18461,Primed-enhancers_Heart_18491,Primed-enhancers_Heart_18506,Primed-enhancers_Heart_18509,Primed-enhancers_Heart_18511,Primed-enhancers_Heart_18517,Primed-enhancers_Heart_18520,Primed-enhancers_Heart_54955
GO:0003002	regionalization	2.14894	58	26.9901	5.55e-05	2.67711	41	15.315	2.23e-06	Acvr1,Acvr2a,Axin1,Bhlhe40,Bmp1,Bmp4,Cdx2,Crb2,Cyp26b1,Dll1,Dmrt2,Ep300,Ext1,Fgf1,Fgfr1,Gli2,Grem1,Hhip,Hipk2,Hoxc13,Hoxc4,Hoxd3,Map3k4,Mef2c,Mllt3,Otx1,Otx2,Pax1,Pbx1,Rnf220,Ror2,Shh,Six1,Six3,Smad3,Smad4,T,Tbx3,Ttc21b,Xrcc2,Zeb2	ENSFDAG00000000501,ENSFDAG00000001117,ENSFDAG00000002080,ENSFDAG00000003851,ENSFDAG00000004686,ENSFDAG00000005005,ENSFDAG00000006696,ENSFDAG00000007144,ENSFDAG00000007195,ENSFDAG00000007378,ENSFDAG00000007429,ENSFDAG00000007667,ENSFDAG00000008134,ENSFDAG00000008970,ENSFDAG00000009044,ENSFDAG00000009182,ENSFDAG00000010065,ENSFDAG00000010296,ENSFDAG00000010309,ENSFDAG00000010330,ENSFDAG00000010332,…	Primed-enhancers_Heart_11338,Primed-enhancers_Heart_13993,Primed-enhancers_Heart_14423,Primed-enhancers_Heart_14427,Primed-enhancers_Heart_14431,Primed-enhancers_Heart_16230,Primed-enhancers_Heart_16231,Primed-enhancers_Heart_16332,Primed-enhancers_Heart_16928,Primed-enhancers_Heart_18461,Primed-enhancers_Heart_18491,Primed-enhancers_Heart_18506,Primed-enhancers_Heart_18509,Primed-enhancers_Heart…
GO:0071773	cellular response to BMP stimulus	4.70831	18	3.82303	5.55e-05	4.56646	8	1.7519	0.00615	Acvr1,Acvr2a,Bmp4,Bmp7,Col2a1,Ext1,Smad1,Smad5	ENSFDAG00000001117,ENSFDAG00000007195,ENSFDAG00000009044,ENSFDAG00000011168,ENSFDAG00000012650,ENSFDAG00000013284,ENSFDAG00000014421,ENSFDAG00000016851	Primed-enhancers_Heart_14097,Primed-enhancers_Heart_16230,Primed-enhancers_Heart_16231,Primed-enhancers_Heart_18461,Primed-enhancers_Heart_18491,Primed-enhancers_Heart_18506,Primed-enhancers_Heart_18509,Primed-enhancers_Heart_18511,Primed-enhancers_Heart_18517,Primed-enhancers_Heart_18520,Primed-enhancers_Heart_19933,Primed-enhancers_Heart_29731,Primed-enhancers_Heart_29870,Primed-enhancers_Heart…
GO:0009887	animal organ morphogenesis	1.6498	102	61.8257	0.000188	2.39982	83	34.586	1.81e-10	Acvr2a,Akt3,Alx3,Ap3b1,Arid5b,Asxl3,Axin1,Bcor,Bmp4,Bmp7,Cdx2,Chd7,Col2a1,Col8a2,Cyp26b1,Dicer1,Dlc1,Dll1,Dlx3,Dspp,Ep300,Ext1,Fgf1,Fgfr1,Fgfr2,Flrt2,Flt1,Gaa,Glg1,Gli2,Grem1,Hhip,Hipk2,Hoxc13,Hoxc4,Hoxd3,Lama1,Lamb1,Lamb2,Lamb3,Mef2c,Meis1,Mfap2,Mllt3,Myc,Nectin1,Notch2,Nrp2,Ntn4,Otx2,Pax1,Pax8,Pax9,Pbx1,Pdgfa,Perp,Plekha1,Prkar1b,Pten,Rarb,Recql4,Rela,Ror2,Shh,Shox2,Six1,Six2,Smad3,Smad4,Src,St…	ENSFDAG00000000432,ENSFDAG00000000501,ENSFDAG00000000528,ENSFDAG00000001117,ENSFDAG00000001530,ENSFDAG00000001543,ENSFDAG00000001830,ENSFDAG00000002080,ENSFDAG00000002748,ENSFDAG00000002992,ENSFDAG00000003851,ENSFDAG00000004569,ENSFDAG00000004696,ENSFDAG00000004839,ENSFDAG00000005005,ENSFDAG00000005574,ENSFDAG00000005594,ENSFDAG00000006096,ENSFDAG00000006696,ENSFDAG00000006853,ENSFDAG00000007144,…	Primed-enhancers_Heart_10108,Primed-enhancers_Heart_10734,Primed-enhancers_Heart_11161,Primed-enhancers_Heart_11338,Primed-enhancers_Heart_1168,Primed-enhancers_Heart_12042,Primed-enhancers_Heart_12344,Primed-enhancers_Heart_13993,Primed-enhancers_Heart_14423,Primed-enhancers_Heart_14427,Primed-enhancers_Heart_14431,Primed-enhancers_Heart_14609,Primed-enhancers_Heart_14614,Primed-enhancers_Heart_…
GO:0003415	chondrocyte hypertrophy	7.23238	11	1.52094	0.000188	10.1115	4	0.395591	0.00694	Ext1,Mex3c,Smad7,Tgfbr2	ENSFDAG00000012384,ENSFDAG00000012650,ENSFDAG00000017680,ENSFDAG00000021094	Primed-enhancers_Heart_18461,Primed-enhancers_Heart_18491,Primed-enhancers_Heart_18506,Primed-enhancers_Heart_18509,Primed-enhancers_Heart_18511,Primed-enhancers_Heart_18517,Primed-enhancers_Heart_18520,Primed-enhancers_Heart_26365,Primed-enhancers_Heart_26415,Primed-enhancers_Heart_26427,Primed-enhancers_Heart_55479
GO:0003300	cardiac muscle hypertrophy	2.99939	26	8.66844	0.000288	2.41296	12	4.97314	0.0361	Camk2d,Foxo1,Foxp1,Jarid2,Lep,Mef2c,Nr4a3,Ppp3ca,Sirt1,Smad3,Smad4,Trim63	ENSFDAG00000000295,ENSFDAG00000008134,ENSFDAG00000008754,ENSFDAG00000008970,ENSFDAG00000009892,ENSFDAG00000012354,ENSFDAG00000013790,ENSFDAG00000014357,ENSFDAG00000014814,ENSFDAG00000015056,ENSFDAG00000019290,ENSFDAG00000020383	Primed-enhancers_Heart_13617,Primed-enhancers_Heart_13639,Primed-enhancers_Heart_13653,Primed-enhancers_Heart_14423,Primed-enhancers_Heart_14427,Primed-enhancers_Heart_14431,Primed-enhancers_Heart_26365,Primed-enhancers_Heart_33684,Primed-enhancers_Heart_33702,Primed-enhancers_Heart_35202,Primed-enhancers_Heart_35209,Primed-enhancers_Heart_35211,Primed-enhancers_Heart_35368,Primed-enhancers_Heart…
GO:0048598	embryonic morphogenesis	1.74036	82	47.1167	0.000288	2.41296	60	24.8657	1.89e-07	Acvr1,Acvr2a,Alx3,Axin1,Bmp4,Bmp7,Cacna1c,Cdkn1c,Chd7,Col2a1,Crb2,Cyp26b1,Dicer1,Dll1,Ext1,Fgfr1,Fgfr2,Flt1,Gli2,Grem1,Hipk2,Hmx2,Hoxc4,Hoxd3,Insig1,Kcnq1,Lbx1,Lmx1b,Lrig1,Mab21l2,Mef2c,Mfap2,Myc,Ncoa1,Notch2,Nr4a3,Otx1,Otx2,Pax8,Pbx1,Pdx1,Pitx1,Rarb,Reck,Ror2,Shh,Shox2,Six1,Six2,Six3,Smad3,Smad4,T,Tbx3,Tbx4,Tbx5,Tcf7,Tgfbr2,Ush1g,Zeb2	ENSFDAG00000000501,ENSFDAG00000000528,ENSFDAG00000000823,ENSFDAG00000001117,ENSFDAG00000002080,ENSFDAG00000002992,ENSFDAG00000003851,ENSFDAG00000004569,ENSFDAG00000004686,ENSFDAG00000004839,ENSFDAG00000005005,ENSFDAG00000005594,ENSFDAG00000006096,ENSFDAG00000006202,ENSFDAG00000006696,ENSFDAG00000007144,ENSFDAG00000007195,ENSFDAG00000007667,ENSFDAG00000008134,ENSFDAG00000008165,ENSFDAG00000008197,…	Primed-enhancers_Heart_10340,Primed-enhancers_Heart_11338,Primed-enhancers_Heart_12344,Primed-enhancers_Heart_13993,Primed-enhancers_Heart_14076,Primed-enhancers_Heart_14423,Primed-enhancers_Heart_14427,Primed-enhancers_Heart_14431,Primed-enhancers_Heart_15454,Primed-enhancers_Heart_16230,Primed-enhancers_Heart_16231,Primed-enhancers_Heart_16332,Primed-enhancers_Heart_18461,Primed-enhancers_Heart…
GO:0060351	cartilage development involved in endochondral bone morphogenesis	5.97287	12	2.00909	0.000288	5.58791	6	1.07375	0.00898	Col2a1,Ext1,Rarb,Shox2,Tgfbr2,Trpv4	ENSFDAG00000005594,ENSFDAG00000006096,ENSFDAG00000011168,ENSFDAG00000012384,ENSFDAG00000012650,ENSFDAG00000013461	Primed-enhancers_Heart_15454,Primed-enhancers_Heart_18461,Primed-enhancers_Heart_18491,Primed-enhancers_Heart_18506,Primed-enhancers_Heart_18509,Primed-enhancers_Heart_18511,Primed-enhancers_Heart_18517,Primed-enhancers_Heart_18520,Primed-enhancers_Heart_19933,Primed-enhancers_Heart_33952,Primed-enhancers_Heart_41492,Primed-enhancers_Heart_55479
GO:0042886	amide transport	1.98251	55	27.7427	0.000383	1.84323	35	18.9884	0.00723	Acvr1c,Adcy8,BC048507,Cacna1c,Chd7,Crh,Ffar4,Foxo1,Ghrhr,Ghsr,Gipr,Gltp,Gpr68,Ildr1,Kcnq1,Lep,Lrp1,Pax8,Pde1c,Pdx1,Ppp3ca,Prkce,Ptprn2,Sidt2,Sirt1,Slc14a2,Slc15a1,Slc16a10,Slc5a6,Slco3a1,Snx19,Tfr2,Tnfsf11,Trpa1,Trpv4	ENSFDAG00000000528,ENSFDAG00000001023,ENSFDAG00000003167,ENSFDAG00000005064,ENSFDAG00000005386,ENSFDAG00000007389,ENSFDAG00000007942,ENSFDAG00000009139,ENSFDAG00000009892,ENSFDAG00000010109,ENSFDAG00000010623,ENSFDAG00000010941,ENSFDAG00000011238,ENSFDAG00000011980,ENSFDAG00000012230,ENSFDAG00000012370,ENSFDAG00000012391,ENSFDAG00000013461,ENSFDAG00000013524,ENSFDAG00000013790,ENSFDAG00000014584,…	Primed-enhancers_Heart_12209,Primed-enhancers_Heart_12344,Primed-enhancers_Heart_12673,Primed-enhancers_Heart_135,Primed-enhancers_Heart_17137,Primed-enhancers_Heart_17486,Primed-enhancers_Heart_18814,Primed-enhancers_Heart_19038,Primed-enhancers_Heart_21313,Primed-enhancers_Heart_24541,Primed-enhancers_Heart_24557,Primed-enhancers_Heart_24564,Primed-enhancers_Heart_26605,Primed-enhancers_Heart_2…
GO:0007167	enzyme-linked receptor protein signaling pathway	1.50503	126	83.7193	0.000442	2.03713	102	50.0705	3.86e-09	Acvr1,Acvr1c,Acvr2a,Adgra2,Afap1l2,Anks1,Arid5b,Atxn1,Axin1,Axl,Bcar3,Bmp4,Bmp7,Bmper,Cdkn1c,Chrdl2,Crb2,Crebbp,Crim1,Dab2ip,Dll1,Dlx3,Dok2,Ep300,Ephb3,Esr1,Ext1,Fam72a,Fermt2,Fgf1,Fgfr1,Fgfr2,Flrt1,Flrt2,Flt1,Fos,Foxo1,Garem1,Ghrhr,Ghsr,Git1,Glg1,Grem1,Hhip,Hipk2,Hspa5,Itgb3,Itgb6,Lep,Lifr,Lrp1,Map3k1,Map3k7,Mmp9,Nck1,Ncoa5,Neu3,Nlk,Notch2,Nr4a3,Nrep,Nrg1,Nrp2,Pakap,Pdgfa,Plekha1,Pten,Rapgef1,Ra…	ENSFDAG00000000432,ENSFDAG00000000501,ENSFDAG00000001117,ENSFDAG00000001530,ENSFDAG00000001543,ENSFDAG00000002080,ENSFDAG00000002571,ENSFDAG00000002748,ENSFDAG00000003167,ENSFDAG00000003601,ENSFDAG00000003824,ENSFDAG00000003851,ENSFDAG00000004238,ENSFDAG00000004474,ENSFDAG00000004686,ENSFDAG00000004696,ENSFDAG00000005064,ENSFDAG00000005088,ENSFDAG00000005324,ENSFDAG00000005729,ENSFDAG00000006607,…	Primed-enhancers_Heart_11907,Primed-enhancers_Heart_12042,Primed-enhancers_Heart_13706,Primed-enhancers_Heart_13718,Primed-enhancers_Heart_13993,Primed-enhancers_Heart_14097,Primed-enhancers_Heart_15037,Primed-enhancers_Heart_15810,Primed-enhancers_Heart_16223,Primed-enhancers_Heart_16230,Primed-enhancers_Heart_16231,Primed-enhancers_Heart_16947,Primed-enhancers_Heart_17643,Primed-enhancers_Heart…
GO:0030252	growth hormone secretion	6.14279	11	1.79072	0.000442	4.42376	5	1.13026	0.0391	Cacna1c,Chd7,Ghrhr,Ghsr,Sirt1	ENSFDAG00000000528,ENSFDAG00000005064,ENSFDAG00000009139,ENSFDAG00000009892,ENSFDAG00000019741	Primed-enhancers_Heart_33319,Primed-enhancers_Heart_35887,Primed-enhancers_Heart_35890,Primed-enhancers_Heart_35891,Primed-enhancers_Heart_35892,Primed-enhancers_Heart_43926,Primed-enhancers_Heart_45388,Primed-enhancers_Heart_45433,Primed-enhancers_Heart_45437,Primed-enhancers_Heart_45463,Primed-enhancers_Heart_5067
GO:0007389	pattern specification process	1.79586	69	38.4218	0.000502	2.46687	52	21.0793	7.35e-07	Acvr1,Acvr2a,Alx3,Axin1,Bcor,Bhlhe40,Bmp1,Bmp4,Bmp7,Cdx2,Crb2,Cyp26b1,Dll1,Dmrt2,Dnah11,Ep300,Ext1,Fgf1,Fgfr1,Fgfr2,Gli2,Grem1,Hhip,Hipk2,Hoxc13,Hoxc4,Hoxd3,Map3k4,Mef2c,Meis1,Mllt3,Notch2,Otx1,Otx2,Pax1,Pbx1,Rnf220,Ror2,Shh,Sim2,Six1,Six2,Six3,Smad3,Smad4,T,Tbx3,Tbx5,Ttc21b,Wls,Xrcc2,Zeb2	ENSFDAG00000000501,ENSFDAG00000001071,ENSFDAG00000001117,ENSFDAG00000002080,ENSFDAG00000003851,ENSFDAG00000004569,ENSFDAG00000004686,ENSFDAG00000005005,ENSFDAG00000006696,ENSFDAG00000007144,ENSFDAG00000007195,ENSFDAG00000007378,ENSFDAG00000007429,ENSFDAG00000007667,ENSFDAG00000008134,ENSFDAG00000008970,ENSFDAG00000009044,ENSFDAG00000009182,ENSFDAG00000010065,ENSFDAG00000010296,ENSFDAG00000010309,…	Primed-enhancers_Heart_11338,Primed-enhancers_Heart_12711,Primed-enhancers_Heart_13993,Primed-enhancers_Heart_14423,Primed-enhancers_Heart_14427,Primed-enhancers_Heart_14431,Primed-enhancers_Heart_16230,Primed-enhancers_Heart_16231,Primed-enhancers_Heart_16332,Primed-enhancers_Heart_16928,Primed-enhancers_Heart_18461,Primed-enhancers_Heart_18491,Primed-enhancers_Heart_18506,Primed-enhancers_Heart…
GO:0048732	gland development	2.08641	46	22.0475	0.000517	2.83121	36	12.7154	3.87e-06	Ada,Arid5b,B4galt1,Bmp4,Cadm1,Cdkn1c,Crh,Ephb3,Ext1,Fgfr2,Ghrhr,Gli2,Hoxd3,Itpr1,Jarid2,Mad1l1,Notch2,Pax1,Pax8,Pbx1,Pdx1,Pitx1,Pkd1,Rela,Runx1,Shh,Six1,Six3,Smad3,Smad4,Tbx3,Tfap2c,Tfcp2l1,Wls,Wnt10a,Xbp1	ENSFDAG00000000295,ENSFDAG00000000362,ENSFDAG00000001543,ENSFDAG00000005005,ENSFDAG00000005064,ENSFDAG00000006696,ENSFDAG00000007429,ENSFDAG00000008134,ENSFDAG00000008613,ENSFDAG00000009044,ENSFDAG00000009085,ENSFDAG00000010248,ENSFDAG00000010263,ENSFDAG00000010330,ENSFDAG00000011238,ENSFDAG00000012280,ENSFDAG00000012403,ENSFDAG00000012545,ENSFDAG00000012650,ENSFDAG00000012722,ENSFDAG00000013185,…	Primed-enhancers_Heart_11338,Primed-enhancers_Heart_1168,Primed-enhancers_Heart_13617,Primed-enhancers_Heart_13639,Primed-enhancers_Heart_13653,Primed-enhancers_Heart_14076,Primed-enhancers_Heart_16230,Primed-enhancers_Heart_16231,Primed-enhancers_Heart_18461,Primed-enhancers_Heart_18491,Primed-enhancers_Heart_18506,Primed-enhancers_Heart_18509,Primed-enhancers_Heart_18511,Primed-enhancers_Heart_…
GO:0001501	skeletal system development	2.32642	37	15.9042	0.000568	3.23994	26	8.02485	1.66e-05	Acvr2a,Bcan,Bmp4,Cdkn1c,Chd7,Col2a1,Dmrt2,Etl4,Ext1,Gli2,Hoxc4,Hoxd1,Mmp9,Notch2,Pax1,Pbx1,Pitx1,Recql4,Ror2,Runx1,Shh,Smad3,T,Tbx3,Trps1,Wfikkn2	ENSFDAG00000000528,ENSFDAG00000001117,ENSFDAG00000003574,ENSFDAG00000006696,ENSFDAG00000007429,ENSFDAG00000009044,ENSFDAG00000009085,ENSFDAG00000009815,ENSFDAG00000010065,ENSFDAG00000011158,ENSFDAG00000011168,ENSFDAG00000012104,ENSFDAG00000012150,ENSFDAG00000012280,ENSFDAG00000012545,ENSFDAG00000012650,ENSFDAG00000013494,ENSFDAG00000014357,ENSFDAG00000014859,ENSFDAG00000014917,ENSFDAG00000015648,…	Primed-enhancers_Heart_13993,Primed-enhancers_Heart_14076,Primed-enhancers_Heart_16230,Primed-enhancers_Heart_16231,Primed-enhancers_Heart_18413,Primed-enhancers_Heart_18461,Primed-enhancers_Heart_18491,Primed-enhancers_Heart_18506,Primed-enhancers_Heart_18509,Primed-enhancers_Heart_18511,Primed-enhancers_Heart_18517,Primed-enhancers_Heart_18520,Primed-enhancers_Heart_19169,Primed-enhancers_Heart…
GO:0070848	response to growth factor	1.66532	85	51.0412	0.000568	2.08802	59	28.2565	1.14e-05	Acvr1,Acvr1c,Acvr2a,Adgra2,Axin1,Bmp4,Bmp7,Bmper,Cdkn1c,Chrdl2,Col2a1,Crb2,Crebbp,Crim1,Dab2ip,Dll1,Ep300,Ext1,Fgf1,Fgfr1,Flt1,Garem1,Git1,Glg1,Grem1,Hhip,Hipk2,Hspa5,Itgb3,Lrp1,Map2k5,Mef2c,Notch2,Nrep,Pax9,Prkce,Rapgef1,Rapgef2,Rela,Runx1,Sema6a,Sirt1,Skor1,Smad1,Smad3,Smad4,Smad5,Smad7,Smurf1,Spry4,Src,Tgfbr2,Ube2o,Vegfa,Veph1,Wfikkn2,Xbp1,Zeb2,Zfhx3	ENSFDAG00000000501,ENSFDAG00000001117,ENSFDAG00000002080,ENSFDAG00000002748,ENSFDAG00000003167,ENSFDAG00000003601,ENSFDAG00000003851,ENSFDAG00000004238,ENSFDAG00000004474,ENSFDAG00000004686,ENSFDAG00000007144,ENSFDAG00000007193,ENSFDAG00000007195,ENSFDAG00000007494,ENSFDAG00000007919,ENSFDAG00000008134,ENSFDAG00000008165,ENSFDAG00000008970,ENSFDAG00000009044,ENSFDAG00000009085,ENSFDAG00000009107,…	Primed-enhancers_Heart_11161,Primed-enhancers_Heart_14097,Primed-enhancers_Heart_14423,Primed-enhancers_Heart_14427,Primed-enhancers_Heart_14431,Primed-enhancers_Heart_16230,Primed-enhancers_Heart_16231,Primed-enhancers_Heart_18461,Primed-enhancers_Heart_18491,Primed-enhancers_Heart_18506,Primed-enhancers_Heart_18509,Primed-enhancers_Heart_18511,Primed-enhancers_Heart_18517,Primed-enhancers_Heart…
GO:0045669	positive regulation of osteoblast differentiation	2.83963	25	8.80395	0.000568	3.33385	13	3.8994	0.00352	Acvr1,Acvr2a,Atraid,Bmp4,Bmp7,Fermt2,Ffar4,Mef2c,Ppp3ca,Smad1,Smad5,Vegfa,Wwtr1	ENSFDAG00000001117,ENSFDAG00000002748,ENSFDAG00000006607,ENSFDAG00000007195,ENSFDAG00000007937,ENSFDAG00000008970,ENSFDAG00000009044,ENSFDAG00000013284,ENSFDAG00000014421,ENSFDAG00000016074,ENSFDAG00000016730,ENSFDAG00000016851,ENSFDAG00000019290	Primed-enhancers_Heart_14097,Primed-enhancers_Heart_14423,Primed-enhancers_Heart_14427,Primed-enhancers_Heart_14431,Primed-enhancers_Heart_16223,Primed-enhancers_Heart_16230,Primed-enhancers_Heart_16231,Primed-enhancers_Heart_23513,Primed-enhancers_Heart_27784,Primed-enhancers_Heart_29731,Primed-enhancers_Heart_29870,Primed-enhancers_Heart_29882,Primed-enhancers_Heart_29883,Primed-enhancers_Heart…
GO:0007498	mesoderm development	3.55446	18	5.06406	0.000616	3.2921	8	2.43006	0.0281	Acvr1,Acvr2a,Axin1,Ext1,Fgfr1,Smad4,T,Vegfa	ENSFDAG00000001117,ENSFDAG00000002080,ENSFDAG00000002748,ENSFDAG00000007144,ENSFDAG00000007195,ENSFDAG00000008134,ENSFDAG00000010065,ENSFDAG00000012650	Primed-enhancers_Heart_18461,Primed-enhancers_Heart_18491,Primed-enhancers_Heart_18506,Primed-enhancers_Heart_18509,Primed-enhancers_Heart_18511,Primed-enhancers_Heart_18517,Primed-enhancers_Heart_18520,Primed-enhancers_Heart_22425,Primed-enhancers_Heart_22833,Primed-enhancers_Heart_22834,Primed-enhancers_Heart_23513,Primed-enhancers_Heart_26365,Primed-enhancers_Heart_29731,Primed-enhancers_Heart…
GO:0071363	cellular response to growth factor stimulus	1.66858	82	49.1436	0.000699	2.12487	58	27.2958	8.52e-06	Acvr1,Acvr1c,Acvr2a,Adgra2,Axin1,Bmp4,Bmp7,Bmper,Cdkn1c,Chrdl2,Col2a1,Crb2,Crebbp,Crim1,Dab2ip,Dll1,Ep300,Ext1,Fgf1,Fgfr1,Flt1,Garem1,Git1,Glg1,Grem1,Hhip,Hipk2,Hspa5,Itgb3,Lrp1,Map2k5,Mef2c,Notch2,Nrep,Pax9,Prkce,Rapgef1,Rapgef2,Rela,Runx1,Sema6a,Sirt1,Skor1,Smad1,Smad3,Smad4,Smad5,Smad7,Smurf1,Spry4,Src,Tgfbr2,Ube2o,Vegfa,Veph1,Wfikkn2,Xbp1,Zeb2	ENSFDAG00000000501,ENSFDAG00000001117,ENSFDAG00000002080,ENSFDAG00000002748,ENSFDAG00000003167,ENSFDAG00000003601,ENSFDAG00000003851,ENSFDAG00000004238,ENSFDAG00000004474,ENSFDAG00000004686,ENSFDAG00000007144,ENSFDAG00000007193,ENSFDAG00000007195,ENSFDAG00000007494,ENSFDAG00000007919,ENSFDAG00000008134,ENSFDAG00000008165,ENSFDAG00000008970,ENSFDAG00000009044,ENSFDAG00000009085,ENSFDAG00000009107,…	Primed-enhancers_Heart_11161,Primed-enhancers_Heart_14097,Primed-enhancers_Heart_14423,Primed-enhancers_Heart_14427,Primed-enhancers_Heart_14431,Primed-enhancers_Heart_16230,Primed-enhancers_Heart_16231,Primed-enhancers_Heart_18461,Primed-enhancers_Heart_18491,Primed-enhancers_Heart_18506,Primed-enhancers_Heart_18509,Primed-enhancers_Heart_18511,Primed-enhancers_Heart_18517,Primed-enhancers_Heart…
GO:0030072	peptide hormone secretion	2.02362	48	23.7199	0.000761	1.93741	30	15.4846	0.00797	Acvr1c,Adcy8,BC048507,Cacna1c,Chd7,Crh,Ffar4,Foxo1,Ghrhr,Ghsr,Gipr,Gpr68,Ildr1,Kcnq1,Lep,Lrp1,Pax8,Pde1c,Pdx1,Ppp3ca,Prkce,Ptprn2,Sidt2,Sirt1,Slc16a10,Snx19,Tfr2,Tnfsf11,Trpa1,Trpv4	ENSFDAG00000000528,ENSFDAG00000003167,ENSFDAG00000005064,ENSFDAG00000005386,ENSFDAG00000007389,ENSFDAG00000009139,ENSFDAG00000009892,ENSFDAG00000010109,ENSFDAG00000010623,ENSFDAG00000010941,ENSFDAG00000011238,ENSFDAG00000011980,ENSFDAG00000012391,ENSFDAG00000013461,ENSFDAG00000013524,ENSFDAG00000013790,ENSFDAG00000014584,ENSFDAG00000015492,ENSFDAG00000016041,ENSFDAG00000016704,ENSFDAG00000016730,…	Primed-enhancers_Heart_12209,Primed-enhancers_Heart_12344,Primed-enhancers_Heart_12673,Primed-enhancers_Heart_135,Primed-enhancers_Heart_17137,Primed-enhancers_Heart_18814,Primed-enhancers_Heart_19038,Primed-enhancers_Heart_21313,Primed-enhancers_Heart_24541,Primed-enhancers_Heart_24557,Primed-enhancers_Heart_24564,Primed-enhancers_Heart_27784,Primed-enhancers_Heart_28978,Primed-enhancers_Heart_2…
GO:0015833	peptide transport	1.95088	51	26.1421	0.000774	1.86878	32	17.1234	0.00923	Acvr1c,Adcy8,BC048507,Cacna1c,Chd7,Crh,Ffar4,Foxo1,Ghrhr,Ghsr,Gipr,Gpr68,Ildr1,Kcnq1,Lep,Lrp1,Pax8,Pde1c,Pdx1,Ppp3ca,Prkce,Ptprn2,Sidt2,Sirt1,Slc15a1,Slc16a10,Slco3a1,Snx19,Tfr2,Tnfsf11,Trpa1,Trpv4	ENSFDAG00000000528,ENSFDAG00000001023,ENSFDAG00000003167,ENSFDAG00000005064,ENSFDAG00000005386,ENSFDAG00000007389,ENSFDAG00000009139,ENSFDAG00000009892,ENSFDAG00000010109,ENSFDAG00000010623,ENSFDAG00000010941,ENSFDAG00000011238,ENSFDAG00000011980,ENSFDAG00000012370,ENSFDAG00000012391,ENSFDAG00000013461,ENSFDAG00000013524,ENSFDAG00000013790,ENSFDAG00000014584,ENSFDAG00000015492,ENSFDAG00000016041,…	Primed-enhancers_Heart_12209,Primed-enhancers_Heart_12344,Primed-enhancers_Heart_12673,Primed-enhancers_Heart_135,Primed-enhancers_Heart_17137,Primed-enhancers_Heart_17486,Primed-enhancers_Heart_18814,Primed-enhancers_Heart_19038,Primed-enhancers_Heart_21313,Primed-enhancers_Heart_24541,Primed-enhancers_Heart_24557,Primed-enhancers_Heart_24564,Primed-enhancers_Heart_27784,Primed-enhancers_Heart_2…
GO:0031069	hair follicle morphogenesis	4.02103	15	3.73038	0.000774	4.56646	8	1.7519	0.00615	Dicer1,Dlx3,Ext1,Fgfr2,Gli2,Runx1,Shh,Wnt10a	ENSFDAG00000006696,ENSFDAG00000010263,ENSFDAG00000012280,ENSFDAG00000012545,ENSFDAG00000012650,ENSFDAG00000018458,ENSFDAG00000020762,ENSFDAG00000021287	Primed-enhancers_Heart_1168,Primed-enhancers_Heart_12344,Primed-enhancers_Heart_18461,Primed-enhancers_Heart_18491,Primed-enhancers_Heart_18506,Primed-enhancers_Heart_18509,Primed-enhancers_Heart_18511,Primed-enhancers_Heart_18517,Primed-enhancers_Heart_18520,Primed-enhancers_Heart_1998,Primed-enhancers_Heart_21978,Primed-enhancers_Heart_39730,Primed-enhancers_Heart_48945,Primed-enhancers_Heart_9…
GO:0007179	transforming growth factor beta receptor signaling pathway	2.22948	37	16.5958	0.000792	2.83878	30	10.5679	3.08e-05	Acvr1,Axin1,Cdkn1c,Crebbp,Ep300,Fermt2,Fos,Glg1,Hipk2,Hspa5,Itgb6,Lrp1,Map3k1,Map3k7,Nlk,Nrep,Sirt1,Smad1,Smad3,Smad4,Smad5,Smad7,Smurf1,Src,Tgfbr2,Veph1,Wfikkn2,Xbp1,Zeb2,Zmiz1	ENSFDAG00000000501,ENSFDAG00000002571,ENSFDAG00000004686,ENSFDAG00000006607,ENSFDAG00000007144,ENSFDAG00000007195,ENSFDAG00000007494,ENSFDAG00000007714,ENSFDAG00000008064,ENSFDAG00000008134,ENSFDAG00000009085,ENSFDAG00000009892,ENSFDAG00000010131,ENSFDAG00000010213,ENSFDAG00000011718,ENSFDAG00000012384,ENSFDAG00000012722,ENSFDAG00000014357,ENSFDAG00000014421,ENSFDAG00000014464,ENSFDAG00000014534,…	Primed-enhancers_Heart_11907,Primed-enhancers_Heart_14097,Primed-enhancers_Heart_15037,Primed-enhancers_Heart_15810,Primed-enhancers_Heart_16223,Primed-enhancers_Heart_19445,Primed-enhancers_Heart_20271,Primed-enhancers_Heart_22833,Primed-enhancers_Heart_22834,Primed-enhancers_Heart_25316,Primed-enhancers_Heart_26365,Primed-enhancers_Heart_26415,Primed-enhancers_Heart_26427,Primed-enhancers_Heart…
GO:0051216	cartilage development	2.22553	37	16.6253	0.000796	3.38841	27	7.96833	5.13e-06	Bmp1,Bmp4,Bmp7,Chrdl2,Col2a1,Dicer1,Dspp,Ep300,Ext1,Glg1,Gli2,Grem1,Hoxc4,Hoxd3,Lep,Pitx1,Rarb,Rela,Shox2,Six2,Smad1,Smad3,Smad5,Smad7,Tgfbr2,Trps1,Trpv4	ENSFDAG00000003601,ENSFDAG00000003851,ENSFDAG00000004569,ENSFDAG00000005594,ENSFDAG00000006096,ENSFDAG00000009044,ENSFDAG00000010131,ENSFDAG00000010330,ENSFDAG00000011158,ENSFDAG00000011168,ENSFDAG00000012104,ENSFDAG00000012384,ENSFDAG00000012545,ENSFDAG00000012650,ENSFDAG00000013284,ENSFDAG00000013461,ENSFDAG00000013790,ENSFDAG00000014357,ENSFDAG00000014421,ENSFDAG00000014827,ENSFDAG00000015145,…	Primed-enhancers_Heart_12344,Primed-enhancers_Heart_14076,Primed-enhancers_Heart_14097,Primed-enhancers_Heart_15454,Primed-enhancers_Heart_16230,Primed-enhancers_Heart_16231,Primed-enhancers_Heart_16928,Primed-enhancers_Heart_18413,Primed-enhancers_Heart_18461,Primed-enhancers_Heart_18491,Primed-enhancers_Heart_18506,Primed-enhancers_Heart_18509,Primed-enhancers_Heart_18511,Primed-enhancers_Heart…
GO:0046879	hormone secretion	1.84572	58	31.4241	0.000805	2.02229	40	19.7795	0.000918	Acvr1c,Acvr2a,Adcy8,BC048507,C1qtnf3,Cacna1c,Chd7,Crh,Cry1,Ffar4,Fgfr1,Foxo1,Ghrhr,Ghsr,Gipr,Gpr68,Ildr1,Kcnq1,Lep,Lrp1,Nrg1,P2ry1,Pax8,Pde1c,Pdx1,Ppp3ca,Prkce,Ptprn2,Runx1,Sidt2,Sirt1,Slc16a10,Smad4,Snx19,Tbx3,Tfr2,Tnfsf11,Trpa1,Trpv4,Ywhaz	ENSFDAG00000000130,ENSFDAG00000000528,ENSFDAG00000001117,ENSFDAG00000002080,ENSFDAG00000003167,ENSFDAG00000003809,ENSFDAG00000005064,ENSFDAG00000005386,ENSFDAG00000007389,ENSFDAG00000008011,ENSFDAG00000008134,ENSFDAG00000009137,ENSFDAG00000009139,ENSFDAG00000009892,ENSFDAG00000010109,ENSFDAG00000010623,ENSFDAG00000010941,ENSFDAG00000011238,ENSFDAG00000011980,ENSFDAG00000012280,ENSFDAG00000012391,…	Primed-enhancers_Heart_12209,Primed-enhancers_Heart_12344,Primed-enhancers_Heart_12673,Primed-enhancers_Heart_135,Primed-enhancers_Heart_17137,Primed-enhancers_Heart_17728,Primed-enhancers_Heart_18231,Primed-enhancers_Heart_18814,Primed-enhancers_Heart_19038,Primed-enhancers_Heart_21313,Primed-enhancers_Heart_21978,Primed-enhancers_Heart_24541,Primed-enhancers_Heart_24557,Primed-enhancers_Heart_2…
GO:0090183	regulation of kidney development	3.57355	17	4.75717	0.000812	4.56646	8	1.7519	0.00615	Bmp4,Grem1,Myc,Pax8,Ppp3ca,Six1,Six2,Vegfa	ENSFDAG00000002748,ENSFDAG00000003851,ENSFDAG00000004569,ENSFDAG00000004839,ENSFDAG00000005005,ENSFDAG00000009044,ENSFDAG00000011238,ENSFDAG00000019290	Primed-enhancers_Heart_11338,Primed-enhancers_Heart_16230,Primed-enhancers_Heart_16231,Primed-enhancers_Heart_18736,Primed-enhancers_Heart_23513,Primed-enhancers_Heart_24511,Primed-enhancers_Heart_24521,Primed-enhancers_Heart_28978,Primed-enhancers_Heart_28988,Primed-enhancers_Heart_31046,Primed-enhancers_Heart_35368,Primed-enhancers_Heart_35370,Primed-enhancers_Heart_35392,Primed-enhancers_Heart…
GO:0060393	regulation of pathway-restricted SMAD protein phosphorylation	3.26726	18	5.5092	0.00139	3.81658	11	2.88216	0.00338	Acvr1,Acvr2a,Bmp4,Bmp7,Bmper,Grem1,Lrp1,Smad4,Smad7,Tgfbr2,Xbp1	ENSFDAG00000001117,ENSFDAG00000003851,ENSFDAG00000007195,ENSFDAG00000008134,ENSFDAG00000009044,ENSFDAG00000012384,ENSFDAG00000012722,ENSFDAG00000013284,ENSFDAG00000016306,ENSFDAG00000017680,ENSFDAG00000017848	Primed-enhancers_Heart_16230,Primed-enhancers_Heart_16231,Primed-enhancers_Heart_26365,Primed-enhancers_Heart_26415,Primed-enhancers_Heart_26427,Primed-enhancers_Heart_29731,Primed-enhancers_Heart_29870,Primed-enhancers_Heart_29882,Primed-enhancers_Heart_29883,Primed-enhancers_Heart_29896,Primed-enhancers_Heart_31046,Primed-enhancers_Heart_32868,Primed-enhancers_Heart_35202,Primed-enhancers_Heart…
GO:0002062	chondrocyte differentiation	2.32977	31	13.306	0.00155	3.80539	20	5.25571	2.92e-05	Bmp4,Chrdl2,Col2a1,Ext1,Fgfr1,Glg1,Gli2,Grem1,Mef2c,Nfib,Rarb,Rela,Ror2,Runx1,Shox2,Six2,Smad3,Smad7,Snx19,Trps1	ENSFDAG00000002080,ENSFDAG00000003601,ENSFDAG00000003851,ENSFDAG00000004569,ENSFDAG00000005594,ENSFDAG00000006096,ENSFDAG00000008970,ENSFDAG00000009044,ENSFDAG00000010131,ENSFDAG00000011168,ENSFDAG00000012104,ENSFDAG00000012167,ENSFDAG00000012280,ENSFDAG00000012545,ENSFDAG00000012650,ENSFDAG00000013494,ENSFDAG00000014357,ENSFDAG00000015145,ENSFDAG00000017680,ENSFDAG00000019398	Primed-enhancers_Heart_13993,Primed-enhancers_Heart_14423,Primed-enhancers_Heart_14427,Primed-enhancers_Heart_14431,Primed-enhancers_Heart_15454,Primed-enhancers_Heart_16230,Primed-enhancers_Heart_16231,Primed-enhancers_Heart_18413,Primed-enhancers_Heart_18461,Primed-enhancers_Heart_18491,Primed-enhancers_Heart_18506,Primed-enhancers_Heart_18509,Primed-enhancers_Heart_18511,Primed-enhancers_Heart…
GO:0035850	epithelial cell differentiation involved in kidney development	3.35566	17	5.06607	0.00159	4.27122	7	1.63888	0.0141	Bmp4,Ext1,Grem1,Mef2c,Mmp9,Pax8,Wwtr1	ENSFDAG00000003851,ENSFDAG00000008970,ENSFDAG00000009044,ENSFDAG00000011238,ENSFDAG00000012650,ENSFDAG00000016074,ENSFDAG00000021416	Primed-enhancers_Heart_14423,Primed-enhancers_Heart_14427,Primed-enhancers_Heart_14431,Primed-enhancers_Heart_16230,Primed-enhancers_Heart_16231,Primed-enhancers_Heart_18461,Primed-enhancers_Heart_18491,Primed-enhancers_Heart_18506,Primed-enhancers_Heart_18509,Primed-enhancers_Heart_18511,Primed-enhancers_Heart_18517,Primed-enhancers_Heart_18520,Primed-enhancers_Heart_28978,Primed-enhancers_Heart…
GO:0001525	angiogenesis	1.64842	75	45.4981	0.00189	2.28323	60	26.2785	7.35e-07	Adamts9,Adgra2,Adgrb1,Akt3,B4galt1,Bmp4,Bmper,Ccl12,Col8a2,Dab2ip,Dicer1,Dll1,Epas1,Ephb3,Erap1,Fgf1,Fgfr1,Fgfr2,Flt1,Ghsr,Grem1,Hhip,Hipk2,Hmgb1,Itgb3,Klf5,Lep,Map3k7,Meis1,Mmp9,Nrp2,Pak4,Pdcd10,Pdgfa,Ppp1r16b,Prok2,Pten,Ptn,Ptprm,Reck,Robo4,Rora,Runx1,Sash1,Sema6a,Shh,Sirt1,Smad1,Smad5,Srpk2,Tafa5,Tbx4,Tgfbr2,Thy1,Tlr3,Vav2,Vegfa,Wasf2,Xbp1,Ywhaz	ENSFDAG00000000501,ENSFDAG00000000823,ENSFDAG00000000917,ENSFDAG00000001830,ENSFDAG00000002080,ENSFDAG00000002571,ENSFDAG00000002748,ENSFDAG00000002992,ENSFDAG00000003851,ENSFDAG00000004238,ENSFDAG00000004696,ENSFDAG00000005242,ENSFDAG00000005395,ENSFDAG00000005565,ENSFDAG00000005950,ENSFDAG00000006696,ENSFDAG00000007633,ENSFDAG00000008165,ENSFDAG00000009044,ENSFDAG00000009137,ENSFDAG00000009317,…	Primed-enhancers_Heart_108,Primed-enhancers_Heart_12344,Primed-enhancers_Heart_14097,Primed-enhancers_Heart_16230,Primed-enhancers_Heart_16231,Primed-enhancers_Heart_17236,Primed-enhancers_Heart_18231,Primed-enhancers_Heart_19072,Primed-enhancers_Heart_19702,Primed-enhancers_Heart_20803,Primed-enhancers_Heart_21324,Primed-enhancers_Heart_21978,Primed-enhancers_Heart_22618,Primed-enhancers_Heart_2…
GO:0090092	regulation of transmembrane receptor protein serine/threonine kinase signaling pathway	1.95123	45	23.0623	0.00189	2.23896	31	13.8457	0.00107	Acvr1,Acvr2a,Axin1,Bmp4,Bmp7,Bmper,Cdkn1c,Chrdl2,Crb2,Crebbp,Crim1,Ep300,Glg1,Grem1,Hipk2,Hspa5,Lrp1,Notch2,Nrep,Sirt1,Skor1,Smad3,Smad4,Smad7,Smurf1,Tgfbr2,Ube2o,Veph1,Wfikkn2,Xbp1,Zeb2	ENSFDAG00000000501,ENSFDAG00000001117,ENSFDAG00000003601,ENSFDAG00000003851,ENSFDAG00000004474,ENSFDAG00000004686,ENSFDAG00000007144,ENSFDAG00000007193,ENSFDAG00000007195,ENSFDAG00000007494,ENSFDAG00000008134,ENSFDAG00000009044,ENSFDAG00000009085,ENSFDAG00000009892,ENSFDAG00000010131,ENSFDAG00000010213,ENSFDAG00000012174,ENSFDAG00000012384,ENSFDAG00000012722,ENSFDAG00000013284,ENSFDAG00000014357,…	Primed-enhancers_Heart_16230,Primed-enhancers_Heart_16231,Primed-enhancers_Heart_19445,Primed-enhancers_Heart_20271,Primed-enhancers_Heart_22833,Primed-enhancers_Heart_22834,Primed-enhancers_Heart_24211,Primed-enhancers_Heart_24212,Primed-enhancers_Heart_25316,Primed-enhancers_Heart_26365,Primed-enhancers_Heart_26415,Primed-enhancers_Heart_26427,Primed-enhancers_Heart_29491,Primed-enhancers_Heart…
GO:0061005	cell differentiation involved in kidney development	2.91446	20	6.86234	0.00199	4.08347	9	2.20401	0.00633	Bmp4,Ext1,Grem1,Mef2c,Mmp9,Pax8,Shh,Six2,Wwtr1	ENSFDAG00000003851,ENSFDAG00000004569,ENSFDAG00000006696,ENSFDAG00000008970,ENSFDAG00000009044,ENSFDAG00000011238,ENSFDAG00000012650,ENSFDAG00000016074,ENSFDAG00000021416	Primed-enhancers_Heart_14423,Primed-enhancers_Heart_14427,Primed-enhancers_Heart_14431,Primed-enhancers_Heart_16230,Primed-enhancers_Heart_16231,Primed-enhancers_Heart_18461,Primed-enhancers_Heart_18491,Primed-enhancers_Heart_18506,Primed-enhancers_Heart_18509,Primed-enhancers_Heart_18511,Primed-enhancers_Heart_18517,Primed-enhancers_Heart_18520,Primed-enhancers_Heart_24511,Primed-enhancers_Heart…
GO:0097553	calcium ion transmembrane import into cytosol	2.15602	35	16.2336	0.00237	1.93037	18	9.32464	0.0451	Adcyap1r1,Bmp4,Cacna1c,Camk2d,Chd7,Gp1ba,Grin2b,Itgb3,Itpr1,Lime1,P2rx1,P2ry6,Ppp3ca,Prkce,Slc24a2,Thy1,Trpa1,Trpv4	ENSFDAG00000000528,ENSFDAG00000004238,ENSFDAG00000009044,ENSFDAG00000009139,ENSFDAG00000009672,ENSFDAG00000011003,ENSFDAG00000011544,ENSFDAG00000013461,ENSFDAG00000013524,ENSFDAG00000013892,ENSFDAG00000014163,ENSFDAG00000015008,ENSFDAG00000015056,ENSFDAG00000015150,ENSFDAG00000016403,ENSFDAG00000016677,ENSFDAG00000019290,ENSFDAG00000021085	Primed-enhancers_Heart_135,Primed-enhancers_Heart_16230,Primed-enhancers_Heart_16231,Primed-enhancers_Heart_24541,Primed-enhancers_Heart_24557,Primed-enhancers_Heart_24564,Primed-enhancers_Heart_33085,Primed-enhancers_Heart_35202,Primed-enhancers_Heart_35209,Primed-enhancers_Heart_35211,Primed-enhancers_Heart_35368,Primed-enhancers_Heart_35370,Primed-enhancers_Heart_35392,Primed-enhancers_Heart_3…
GO:0001707	mesoderm formation	3.49465	15	4.29228	0.00247	4.0216	10	2.48657	0.00403	Acvr1,Axin1,Bmp4,Bmp7,Crb2,Exoc4,Nr4a3,Smad3,T,Wls	ENSFDAG00000007144,ENSFDAG00000007195,ENSFDAG00000009044,ENSFDAG00000010065,ENSFDAG00000012174,ENSFDAG00000012199,ENSFDAG00000012403,ENSFDAG00000013284,ENSFDAG00000014357,ENSFDAG00000014814	Primed-enhancers_Heart_16230,Primed-enhancers_Heart_16231,Primed-enhancers_Heart_22425,Primed-enhancers_Heart_22833,Primed-enhancers_Heart_22834,Primed-enhancers_Heart_29601,Primed-enhancers_Heart_29870,Primed-enhancers_Heart_29882,Primed-enhancers_Heart_29883,Primed-enhancers_Heart_29896,Primed-enhancers_Heart_32868,Primed-enhancers_Heart_35803,Primed-enhancers_Heart_36455,Primed-enhancers_Heart…
GO:0032868	response to insulin	2.17334	33	15.184	0.00255	2.57867	29	11.2461	0.00021	Aanat,Acvr1c,Akt3,Atp2b1,Cry1,Foxo1,Ghrhr,Ghsr,Insig1,Kbtbd2,Kcnq1,Lep,Nck1,Ncoa1,Ncoa5,Pten,Rab12,Rela,Rhoq,Sgk1,Sirt1,Src,Srsf5,Tbc1d4,Trpv4,Tsc1,Tsc2,Vps13c,Xbp1	ENSFDAG00000001780,ENSFDAG00000003167,ENSFDAG00000004027,ENSFDAG00000004517,ENSFDAG00000004696,ENSFDAG00000005064,ENSFDAG00000008011,ENSFDAG00000009517,ENSFDAG00000009699,ENSFDAG00000009892,ENSFDAG00000010623,ENSFDAG00000011408,ENSFDAG00000011562,ENSFDAG00000012722,ENSFDAG00000013461,ENSFDAG00000013790,ENSFDAG00000015133,ENSFDAG00000015145,ENSFDAG00000015163,ENSFDAG00000015291,ENSFDAG00000017412,…	Primed-enhancers_Heart_10340,Primed-enhancers_Heart_11636,Primed-enhancers_Heart_17275,Primed-enhancers_Heart_22737,Primed-enhancers_Heart_23935,Primed-enhancers_Heart_23967,Primed-enhancers_Heart_23984,Primed-enhancers_Heart_24619,Primed-enhancers_Heart_25928,Primed-enhancers_Heart_26975,Primed-enhancers_Heart_27681,Primed-enhancers_Heart_29180,Primed-enhancers_Heart_29870,Primed-enhancers_Heart…
GO:0022603	regulation of anatomical structure morphogenesis	1.41465	128	90.4819	0.0029	1.87845	100	53.2352	3.55e-07	Ada,Adamts9,Adgra2,Adgrb1,Akt3,Arap3,Bmp4,Bmp7,Bmper,Ccl12,Cdc42se2,Cdx2,Crb2,Cux1,Cyrib,Dab2ip,Ddhd1,Dicer1,Disc1,Dlc1,Dll1,Dmrt2,Dtnbp1,Ephb3,Erap1,Esr1,Fermt2,Fgf1,Fgfr1,Fgfr2,Flt1,Foxp1,Ghsr,Grem1,Hecw1,Hhip,Hipk2,Hmgb1,Islr2,Itgb3,Itsn2,Kif13b,Lep,Lrp1,Mapt,Mef2c,Mllt3,Mmp9,Myo10,Ntn4,Otx2,P2ry1,Pak4,Pakap,Pax8,Pax9,Pdcd10,Pdgfa,Ppp1r16b,Ppp3ca,Prag1,Prex1,Pten,Ptn,Ptprm,Rapgef2,Reck,Rhoq,Ri…	ENSFDAG00000000247,ENSFDAG00000000501,ENSFDAG00000000589,ENSFDAG00000000823,ENSFDAG00000000859,ENSFDAG00000000917,ENSFDAG00000002080,ENSFDAG00000002748,ENSFDAG00000003809,ENSFDAG00000003824,ENSFDAG00000003851,ENSFDAG00000004238,ENSFDAG00000004569,ENSFDAG00000004686,ENSFDAG00000004696,ENSFDAG00000005005,ENSFDAG00000005242,ENSFDAG00000005565,ENSFDAG00000005594,ENSFDAG00000005790,ENSFDAG00000005950,…	Primed-enhancers_Heart_10340,Primed-enhancers_Heart_108,Primed-enhancers_Heart_11161,Primed-enhancers_Heart_11338,Primed-enhancers_Heart_1168,Primed-enhancers_Heart_12344,Primed-enhancers_Heart_12977,Primed-enhancers_Heart_13617,Primed-enhancers_Heart_13639,Primed-enhancers_Heart_13653,Primed-enhancers_Heart_13993,Primed-enhancers_Heart_14423,Primed-enhancers_Heart_14427,Primed-enhancers_Heart_14…
GO:0000122	negative regulation of transcription by RNA polymerase II	1.47449	105	71.2108	0.00297	1.93037	90	46.6232	6e-07	Apbb1,Arid5b,Atxn1,Bach2,Barx2,Bcor,Bhlhe40,Bmp4,Cbfa2t2,Cbx4,Cbx8,Cdkn1c,Cdx2,Ciita,Cnot2,Crebbp,Cry1,Cux1,Dab2ip,Dicer1,Dlx4,Ep300,Epas1,Esr1,Fgfr1,Fgfr2,Foxp1,Gfi1b,Gli2,Hipk2,Hmgb1,Ikzf5,Jarid2,Jdp2,Klf12,Klf5,Lep,Map2k5,Max,Mef2c,Mnt,Mxd4,Myc,Nck1,Nfib,Nfil3,Nkx6-2,Notch2,Nr4a3,Pdx1,Pias1,Pkig,Rarb,Rela,Runx1,Rybp,Scaf8,Sfpq,Shh,Shox2,Sim2,Sirt1,Six1,Skor1,Smad3,Smad4,Smad5,Smad7,T,Tbx3,Tcf7…	ENSFDAG00000000295,ENSFDAG00000000457,ENSFDAG00000000501,ENSFDAG00000000997,ENSFDAG00000001423,ENSFDAG00000001543,ENSFDAG00000002080,ENSFDAG00000002748,ENSFDAG00000004686,ENSFDAG00000004839,ENSFDAG00000004922,ENSFDAG00000005005,ENSFDAG00000005020,ENSFDAG00000005238,ENSFDAG00000005594,ENSFDAG00000005626,ENSFDAG00000006096,ENSFDAG00000006171,ENSFDAG00000006288,ENSFDAG00000006696,ENSFDAG00000007522,…	Primed-enhancers_Heart_10090,Primed-enhancers_Heart_10102,Primed-enhancers_Heart_108,Primed-enhancers_Heart_11338,Primed-enhancers_Heart_11514,Primed-enhancers_Heart_11846,Primed-enhancers_Heart_11907,Primed-enhancers_Heart_12344,Primed-enhancers_Heart_13617,Primed-enhancers_Heart_13639,Primed-enhancers_Heart_13653,Primed-enhancers_Heart_13706,Primed-enhancers_Heart_13718,Primed-enhancers_Heart_1…
GO:1903670	regulation of sprouting angiogenesis	3.22573	16	4.96012	0.00324	5.17904	12	2.31703	0.00016	Adamts9,Bmper,Dll1,Fgf1,Flt1,Ghsr,Hmgb1,Ppp1r16b,Sema6a,Shh,Smad1,Vegfa	ENSFDAG00000002748,ENSFDAG00000006696,ENSFDAG00000008165,ENSFDAG00000009317,ENSFDAG00000010332,ENSFDAG00000013109,ENSFDAG00000014165,ENSFDAG00000014421,ENSFDAG00000014660,ENSFDAG00000016306,ENSFDAG00000017607,ENSFDAG00000019741	Primed-enhancers_Heart_108,Primed-enhancers_Heart_22618,Primed-enhancers_Heart_23513,Primed-enhancers_Heart_25595,Primed-enhancers_Heart_25809,Primed-enhancers_Heart_25826,Primed-enhancers_Heart_32387,Primed-enhancers_Heart_33319,Primed-enhancers_Heart_35202,Primed-enhancers_Heart_35209,Primed-enhancers_Heart_35211,Primed-enhancers_Heart_39730,Primed-enhancers_Heart_42629,Primed-enhancers_Heart_4…
GO:0010817	regulation of hormone levels	1.63276	72	44.0972	0.00327	1.74269	52	29.8389	0.00236	Aanat,Acvr1c,Acvr2a,Adcy8,BC048507,C1qtnf3,Cacna1c,Cacna1h,Chd7,Chst8,Crh,Cry1,Cyp26b1,Cyp2s1,Esr1,Ffar4,Fgfr1,Foxo1,Ghrhr,Ghsr,Gipr,Gpr68,H6pd,Ildr1,Iyd,Kcnq1,Lep,Lrp1,Nrg1,P2ry1,Pax8,Pde1c,Pdx1,Plekha1,Ppp3ca,Prkce,Ptprn2,Runx1,Shh,Sidt2,Sirt1,Slc16a10,Slco4a1,Smad4,Snx19,Tbx3,Tfr2,Tiparp,Tnfsf11,Trpa1,Trpv4,Ywhaz	ENSFDAG00000000130,ENSFDAG00000000432,ENSFDAG00000000528,ENSFDAG00000001117,ENSFDAG00000002080,ENSFDAG00000003167,ENSFDAG00000003809,ENSFDAG00000004027,ENSFDAG00000005064,ENSFDAG00000005386,ENSFDAG00000006696,ENSFDAG00000006712,ENSFDAG00000007389,ENSFDAG00000007687,ENSFDAG00000008011,ENSFDAG00000008134,ENSFDAG00000008747,ENSFDAG00000009137,ENSFDAG00000009139,ENSFDAG00000009302,ENSFDAG00000009892,…	Primed-enhancers_Heart_12209,Primed-enhancers_Heart_12344,Primed-enhancers_Heart_12673,Primed-enhancers_Heart_135,Primed-enhancers_Heart_17137,Primed-enhancers_Heart_17728,Primed-enhancers_Heart_18231,Primed-enhancers_Heart_18814,Primed-enhancers_Heart_19038,Primed-enhancers_Heart_21313,Primed-enhancers_Heart_21978,Primed-enhancers_Heart_22774,Primed-enhancers_Heart_24541,Primed-enhancers_Heart_2…
GO:0001654	eye development	2.27429	28	12.3116	0.00387	3.21728	20	6.21643	0.000247	Abcb5,Bmp4,Bmp7,Cacna1c,Cdkn1c,Chd7,Cryba4,Hmgb1,Lama1,Lmx1b,Mab21l2,Map3k1,Meis1,Pbx1,Shh,Six3,Six6,Smoc1,Vegfa,Vsx2	ENSFDAG00000000528,ENSFDAG00000002748,ENSFDAG00000006696,ENSFDAG00000009044,ENSFDAG00000009068,ENSFDAG00000009085,ENSFDAG00000009139,ENSFDAG00000009206,ENSFDAG00000009317,ENSFDAG00000012688,ENSFDAG00000013284,ENSFDAG00000013603,ENSFDAG00000014188,ENSFDAG00000014286,ENSFDAG00000016296,ENSFDAG00000017835,ENSFDAG00000018008,ENSFDAG00000018113,ENSFDAG00000019790,ENSFDAG00000020695	Primed-enhancers_Heart_108,Primed-enhancers_Heart_11338,Primed-enhancers_Heart_11636,Primed-enhancers_Heart_11846,Primed-enhancers_Heart_12715,Primed-enhancers_Heart_15037,Primed-enhancers_Heart_16230,Primed-enhancers_Heart_16231,Primed-enhancers_Heart_23513,Primed-enhancers_Heart_24001,Primed-enhancers_Heart_24501,Primed-enhancers_Heart_24511,Primed-enhancers_Heart_29428,Primed-enhancers_Heart_3…
GO:0030326	embryonic limb morphogenesis	2.31839	27	11.646	0.00387	4.0216	20	4.97314	1.35e-05	Alx3,Bmp4,Bmp7,Cacna1c,Chd7,Cyp26b1,Dicer1,Fgfr1,Grem1,Lmx1b,Notch2,Pbx1,Pitx1,Rarb,Reck,Shh,Shox2,Tbx3,Tbx4,Tbx5	ENSFDAG00000000528,ENSFDAG00000000823,ENSFDAG00000002080,ENSFDAG00000002992,ENSFDAG00000003851,ENSFDAG00000005594,ENSFDAG00000006096,ENSFDAG00000006696,ENSFDAG00000009044,ENSFDAG00000009068,ENSFDAG00000009139,ENSFDAG00000011430,ENSFDAG00000012216,ENSFDAG00000012808,ENSFDAG00000013284,ENSFDAG00000014859,ENSFDAG00000018008,ENSFDAG00000019044,ENSFDAG00000019062,ENSFDAG00000021287	Primed-enhancers_Heart_12344,Primed-enhancers_Heart_14076,Primed-enhancers_Heart_15454,Primed-enhancers_Heart_16230,Primed-enhancers_Heart_16231,Primed-enhancers_Heart_29428,Primed-enhancers_Heart_31046,Primed-enhancers_Heart_3152,Primed-enhancers_Heart_32868,Primed-enhancers_Heart_33952,Primed-enhancers_Heart_34606,Primed-enhancers_Heart_34920,Primed-enhancers_Heart_34921,Primed-enhancers_Heart_…
GO:1905562	regulation of vascular endothelial cell proliferation	4.26084	11	2.58165	0.00387	5.68769	9	1.58236	0.000802	Akt3,Ccl12,Dicer1,Fgfr1,Flt1,Ghsr,Hmgb1,Mef2c,Tsc2	ENSFDAG00000000917,ENSFDAG00000002080,ENSFDAG00000008165,ENSFDAG00000008970,ENSFDAG00000009317,ENSFDAG00000018495,ENSFDAG00000018752,ENSFDAG00000019741,ENSFDAG00000021287	Primed-enhancers_Heart_108,Primed-enhancers_Heart_12344,Primed-enhancers_Heart_14423,Primed-enhancers_Heart_14427,Primed-enhancers_Heart_14431,Primed-enhancers_Heart_22737,Primed-enhancers_Heart_33319,Primed-enhancers_Heart_3371,Primed-enhancers_Heart_42629,Primed-enhancers_Heart_49981,Primed-enhancers_Heart_8670
GO:0090278	negative regulation of peptide hormone secretion	2.87809	18	6.25416	0.0042	2.85404	10	3.50381	0.0272	Acvr1c,Crh,Ffar4,Foxo1,Ghsr,Kcnq1,Lep,Pde1c,Ppp3ca,Sirt1	ENSFDAG00000003167,ENSFDAG00000005386,ENSFDAG00000009892,ENSFDAG00000010623,ENSFDAG00000013790,ENSFDAG00000016730,ENSFDAG00000018370,ENSFDAG00000019290,ENSFDAG00000019741,ENSFDAG00000020383	Primed-enhancers_Heart_27784,Primed-enhancers_Heart_29870,Primed-enhancers_Heart_33235,Primed-enhancers_Heart_33319,Primed-enhancers_Heart_33684,Primed-enhancers_Heart_33702,Primed-enhancers_Heart_35368,Primed-enhancers_Heart_35370,Primed-enhancers_Heart_35392,Primed-enhancers_Heart_35396,Primed-enhancers_Heart_35419,Primed-enhancers_Heart_35421,Primed-enhancers_Heart_35422,Primed-enhancers_Heart…
GO:0001655	urogenital system development	5.85725	8	1.36583	0.00425	5.05573	4	0.791182	0.0491	Acvr1,Ephb3,Pax8,Pbx1	ENSFDAG00000007195,ENSFDAG00000010248,ENSFDAG00000011238,ENSFDAG00000018008	Primed-enhancers_Heart_20803,Primed-enhancers_Heart_28978,Primed-enhancers_Heart_28988,Primed-enhancers_Heart_29870,Primed-enhancers_Heart_29882,Primed-enhancers_Heart_29883,Primed-enhancers_Heart_29896,Primed-enhancers_Heart_3152
GO:0007159	leukocyte cell-cell adhesion	1.78359	50	28.0333	0.00464	1.63111	33	20.2317	0.0362	Ada,Ambra1,Ap3b1,Arid1b,Bmp4,Bmp7,Cd40lg,Cyrib,Ext1,Golph3,Gp1ba,Hmgb1,Jam2,Kitl,Lep,Mad1l1,Nck1,Nr4a3,Ppp3ca,Pten,Rela,Runx1,Shh,Sirpb1c,Smad7,Socs5,Tgfbr2,Thy1,Tnfsf11,Tsc2,Xbp1,Zfp608,Zmiz1	ENSFDAG00000001885,ENSFDAG00000004696,ENSFDAG00000005600,ENSFDAG00000006696,ENSFDAG00000007522,ENSFDAG00000009044,ENSFDAG00000009317,ENSFDAG00000009672,ENSFDAG00000010109,ENSFDAG00000010798,ENSFDAG00000011718,ENSFDAG00000011816,ENSFDAG00000011899,ENSFDAG00000012280,ENSFDAG00000012384,ENSFDAG00000012650,ENSFDAG00000012722,ENSFDAG00000013284,ENSFDAG00000013790,ENSFDAG00000014814,ENSFDAG00000015145,…	Primed-enhancers_Heart_108,Primed-enhancers_Heart_14609,Primed-enhancers_Heart_14614,Primed-enhancers_Heart_15810,Primed-enhancers_Heart_16230,Primed-enhancers_Heart_16231,Primed-enhancers_Heart_17137,Primed-enhancers_Heart_17784,Primed-enhancers_Heart_18461,Primed-enhancers_Heart_18491,Primed-enhancers_Heart_18506,Primed-enhancers_Heart_18509,Primed-enhancers_Heart_18511,Primed-enhancers_Heart_1…
GO:0048562	embryonic organ morphogenesis	2.16284	30	13.8707	0.00495	2.94917	21	7.12064	0.000465	Alx3,Axin1,Bmp4,Bmp7,Chd7,Col2a1,Fgfr2,Hipk2,Hoxc4,Hoxd3,Mef2c,Mfap2,Rarb,Ror2,Shh,Shox2,Six1,Six2,Smad3,Tcf7,Tgfbr2	ENSFDAG00000000501,ENSFDAG00000000528,ENSFDAG00000004569,ENSFDAG00000005005,ENSFDAG00000005594,ENSFDAG00000006096,ENSFDAG00000006696,ENSFDAG00000007144,ENSFDAG00000008970,ENSFDAG00000009044,ENSFDAG00000010330,ENSFDAG00000011158,ENSFDAG00000011168,ENSFDAG00000012384,ENSFDAG00000012808,ENSFDAG00000012984,ENSFDAG00000013284,ENSFDAG00000013494,ENSFDAG00000014357,ENSFDAG00000016092,ENSFDAG00000018458	Primed-enhancers_Heart_11338,Primed-enhancers_Heart_13993,Primed-enhancers_Heart_14423,Primed-enhancers_Heart_14427,Primed-enhancers_Heart_14431,Primed-enhancers_Heart_15454,Primed-enhancers_Heart_16230,Primed-enhancers_Heart_16231,Primed-enhancers_Heart_19933,Primed-enhancers_Heart_20204,Primed-enhancers_Heart_22833,Primed-enhancers_Heart_22834,Primed-enhancers_Heart_24511,Primed-enhancers_Heart…
GO:0048706	embryonic skeletal system development	2.87425	17	5.91459	0.00613	3.31782	9	2.71262	0.018	Acvr2a,Bmp4,Dmrt2,Etl4,Ext1,Hoxd1,Pbx1,Shh,T	ENSFDAG00000001117,ENSFDAG00000003574,ENSFDAG00000006696,ENSFDAG00000009044,ENSFDAG00000010065,ENSFDAG00000012150,ENSFDAG00000012650,ENSFDAG00000015648,ENSFDAG00000018008	Primed-enhancers_Heart_16230,Primed-enhancers_Heart_16231,Primed-enhancers_Heart_18461,Primed-enhancers_Heart_18491,Primed-enhancers_Heart_18506,Primed-enhancers_Heart_18509,Primed-enhancers_Heart_18511,Primed-enhancers_Heart_18517,Primed-enhancers_Heart_18520,Primed-enhancers_Heart_22425,Primed-enhancers_Heart_27468,Primed-enhancers_Heart_28910,Primed-enhancers_Heart_29731,Primed-enhancers_Heart…
GO:0009953	dorsal/ventral pattern formation	2.59881	20	7.69583	0.00615	3.19494	13	4.06894	0.00478	Acvr1,Axin1,Bmp1,Bmp4,Gli2,Grem1,Hhip,Map3k4,Otx2,Rnf220,Shh,Six3,Ttc21b	ENSFDAG00000003851,ENSFDAG00000006696,ENSFDAG00000007144,ENSFDAG00000007195,ENSFDAG00000007378,ENSFDAG00000007667,ENSFDAG00000009044,ENSFDAG00000009182,ENSFDAG00000010296,ENSFDAG00000010853,ENSFDAG00000012545,ENSFDAG00000014286,ENSFDAG00000017022	Primed-enhancers_Heart_16230,Primed-enhancers_Heart_16231,Primed-enhancers_Heart_16332,Primed-enhancers_Heart_16928,Primed-enhancers_Heart_1998,Primed-enhancers_Heart_22522,Primed-enhancers_Heart_22833,Primed-enhancers_Heart_22834,Primed-enhancers_Heart_24501,Primed-enhancers_Heart_24511,Primed-enhancers_Heart_29870,Primed-enhancers_Heart_29882,Primed-enhancers_Heart_29883,Primed-enhancers_Heart_…
GO:0023061	signal release	1.54988	77	49.6813	0.00656	1.80897	55	30.404	0.000784	Acvr1c,Acvr2a,Adcy8,BC048507,C1qtnf3,Cacna1c,Chd7,Cplx4,Crh,Cry1,Dgki,Dtnbp1,Ffar4,Fgfr1,Foxo1,Ghrhr,Ghsr,Gipr,Git1,Gpr68,Grm2,Ildr1,Kcnq1,Lep,Lrp1,Mef2c,Nrg1,P2rx1,P2ry1,P2ry2,Pax8,Pde1c,Pdx1,Ppp3ca,Prkce,Ptprn2,Rims1,Rims4,Runx1,Sidt2,Sirt1,Slc16a10,Slc6a9,Smad4,Snx19,Sptbn2,Syt13,Tbx3,Tfr2,Tnfsf11,Trpa1,Trpv4,Wls,Xbp1,Ywhaz	ENSFDAG00000000130,ENSFDAG00000000528,ENSFDAG00000001117,ENSFDAG00000002080,ENSFDAG00000003167,ENSFDAG00000003809,ENSFDAG00000005064,ENSFDAG00000005386,ENSFDAG00000007099,ENSFDAG00000007389,ENSFDAG00000008011,ENSFDAG00000008121,ENSFDAG00000008134,ENSFDAG00000008970,ENSFDAG00000009137,ENSFDAG00000009139,ENSFDAG00000009275,ENSFDAG00000009892,ENSFDAG00000010109,ENSFDAG00000010623,ENSFDAG00000010941,…	Primed-enhancers_Heart_12209,Primed-enhancers_Heart_12344,Primed-enhancers_Heart_12673,Primed-enhancers_Heart_135,Primed-enhancers_Heart_13617,Primed-enhancers_Heart_13639,Primed-enhancers_Heart_13653,Primed-enhancers_Heart_14423,Primed-enhancers_Heart_14427,Primed-enhancers_Heart_14431,Primed-enhancers_Heart_17137,Primed-enhancers_Heart_17728,Primed-enhancers_Heart_18231,Primed-enhancers_Heart_1…
GO:0048646	anatomical structure formation involved in morphogenesis	1.3862	125	90.1743	0.00679	1.81074	101	55.7783	1.08e-06	Acvr1,Ada,Adamts15,Adamts9,Adgra2,Adgrb1,Akt3,Axin1,B4galt1,Bmp4,Bmp7,Bmper,Ccl12,Cdx2,Col8a2,Crb2,Dab2ip,Dicer1,Dlc1,Dll1,Dmrt2,Dspp,Dusp4,Ep300,Epas1,Ephb3,Erap1,Exoc4,Fgf1,Fgfr1,Fgfr2,Flt1,Ghsr,Gli2,Grem1,Hhip,Hipk2,Hmgb1,Itgb3,Kbtbd8,Klf5,Lep,Map3k7,Mef2c,Meis1,Mfap2,Mmp9,Nbeal2,Nfib,Nr4a3,Nrp2,Otx2,Pak4,Pax1,Pax8,Pdcd10,Pdgfa,Perp,Ppp1r16b,Prickle1,Prok2,Pten,Ptn,Ptprm,Reck,Robo4,Ror2,Rora,R…	ENSFDAG00000000093,ENSFDAG00000000501,ENSFDAG00000000823,ENSFDAG00000000917,ENSFDAG00000001830,ENSFDAG00000002080,ENSFDAG00000002571,ENSFDAG00000002748,ENSFDAG00000002992,ENSFDAG00000003851,ENSFDAG00000003873,ENSFDAG00000003999,ENSFDAG00000004238,ENSFDAG00000004686,ENSFDAG00000004696,ENSFDAG00000005005,ENSFDAG00000005242,ENSFDAG00000005395,ENSFDAG00000005565,ENSFDAG00000005950,ENSFDAG00000006696,…	Primed-enhancers_Heart_108,Primed-enhancers_Heart_11338,Primed-enhancers_Heart_12344,Primed-enhancers_Heart_13993,Primed-enhancers_Heart_14097,Primed-enhancers_Heart_14423,Primed-enhancers_Heart_14427,Primed-enhancers_Heart_14431,Primed-enhancers_Heart_16230,Primed-enhancers_Heart_16231,Primed-enhancers_Heart_16332,Primed-enhancers_Heart_17236,Primed-enhancers_Heart_18231,Primed-enhancers_Heart_1…
GO:0030163	protein catabolic process	1.51918	83	54.6349	0.00679	1.50644	67	44.4757	0.00903	Adgrb1,Anks1,Ate1,Atraid,Axin1,Birc2,Ccar2,Chek2,Dab2ip,Dennd3,Derl1,Disc1,Edem3,Erap1,Ext1,Fbxl3,Fbxl4,Fbxl7,Foxo1,Hecw1,Hipk2,Hspa5,Klhl22,Laptm4b,Lnpep,Lrp1,Lypla1,Mmp9,Mylip,Nccrp1,Nrg1,Nsfl1c,Pias1,Pkd1,Prickle1,Psma2,Pten,Rab12,Rbx1,Rela,Rnf103,Rnf139,Rnf40,Rybp,Sec22b,Senp1,Sh3rf1,Sh3rf2,Shh,Sirt1,Skp1,Smad3,Smad4,Smad7,Smurf1,Socs5,Spsb1,Tiparp,Tmtc3,Tnfaip3,Trim63,Ube2h,Usp19,Usp25,Wwtr1…	ENSFDAG00000000501,ENSFDAG00000000540,ENSFDAG00000000589,ENSFDAG00000000659,ENSFDAG00000002313,ENSFDAG00000004696,ENSFDAG00000005362,ENSFDAG00000005687,ENSFDAG00000005800,ENSFDAG00000005967,ENSFDAG00000006696,ENSFDAG00000007089,ENSFDAG00000007144,ENSFDAG00000007494,ENSFDAG00000007937,ENSFDAG00000007962,ENSFDAG00000008134,ENSFDAG00000008528,ENSFDAG00000008716,ENSFDAG00000008747,ENSFDAG00000008754,…	Primed-enhancers_Heart_12042,Primed-enhancers_Heart_12739,Primed-enhancers_Heart_12977,Primed-enhancers_Heart_13678,Primed-enhancers_Heart_16910,Primed-enhancers_Heart_17304,Primed-enhancers_Heart_17521,Primed-enhancers_Heart_17969,Primed-enhancers_Heart_17975,Primed-enhancers_Heart_18143,Primed-enhancers_Heart_18461,Primed-enhancers_Heart_18491,Primed-enhancers_Heart_18506,Primed-enhancers_Heart…
GO:0016567	protein ubiquitination	1.55937	73	46.8137	0.00747	1.52067	55	36.1683	0.0173	Adgrb1,Ambra1,Axin1,Babam2,Bcor,Birc2,Bub3,Cbx8,Cry1,Dcun1d5,Derl1,Fbxl3,Fbxl7,Fbxo28,Hecw1,Herc3,Herc4,Hspa5,Kbtbd8,Klhl22,Klhl24,Lonrf1,Map3k1,Med27,Med30,Mgrn1,Mylip,Otub1,Prickle1,Prkce,Pten,Rbx1,Rnf103,Rnf139,Rnf220,Rnf40,Rybp,Sash1,Sh3rf1,Sh3rf2,Sirt1,Skp1,Smad7,Smurf1,Socs7,Spsb1,Tnfaip3,Tnks,Trim55,Trim63,Ube2h,Ube2o,Ube3b,Wwtr1,Znrf3	ENSFDAG00000002313,ENSFDAG00000002916,ENSFDAG00000003999,ENSFDAG00000004474,ENSFDAG00000004696,ENSFDAG00000005242,ENSFDAG00000005362,ENSFDAG00000005523,ENSFDAG00000005798,ENSFDAG00000006105,ENSFDAG00000006525,ENSFDAG00000007089,ENSFDAG00000007144,ENSFDAG00000007494,ENSFDAG00000007717,ENSFDAG00000007962,ENSFDAG00000008011,ENSFDAG00000008528,ENSFDAG00000008742,ENSFDAG00000008754,ENSFDAG00000009028,…	Primed-enhancers_Heart_10090,Primed-enhancers_Heart_12977,Primed-enhancers_Heart_13678,Primed-enhancers_Heart_15037,Primed-enhancers_Heart_17304,Primed-enhancers_Heart_17969,Primed-enhancers_Heart_17975,Primed-enhancers_Heart_18461,Primed-enhancers_Heart_18491,Primed-enhancers_Heart_18506,Primed-enhancers_Heart_18509,Primed-enhancers_Heart_18511,Primed-enhancers_Heart_18517,Primed-enhancers_Heart…
GO:0002521	leukocyte differentiation	1.60928	66	41.0122	0.00747	1.65684	50	30.1779	0.00685	Ada,Ambra1,Ap3b1,Arid1b,Axl,Bmp4,Cd40lg,Chd7,Cldn18,Cyp26b1,Dicer1,Dll1,Ep300,Fos,Foxp1,Gadd45g,Gfi1b,Gpr68,Hmgb1,Itgb3,Itgb6,Kitl,Lep,Mef2c,Mr1,Myc,Nfil3,Notch2,Pax1,Pbx1,Ppp3ca,Prex1,Ror2,Rora,Runx1,Sh3rf1,Shh,Sirt1,Smad7,Socs5,Tcf7,Tgfbr2,Tnfaip3,Tnfsf11,Tsc1,Vegfa,Xbp1,Zbtb46,Zfp608,Zmiz1	ENSFDAG00000000528,ENSFDAG00000000997,ENSFDAG00000002748,ENSFDAG00000004238,ENSFDAG00000004839,ENSFDAG00000005395,ENSFDAG00000005603,ENSFDAG00000005626,ENSFDAG00000006063,ENSFDAG00000006696,ENSFDAG00000007429,ENSFDAG00000007522,ENSFDAG00000007714,ENSFDAG00000008064,ENSFDAG00000008970,ENSFDAG00000009028,ENSFDAG00000009044,ENSFDAG00000009317,ENSFDAG00000009892,ENSFDAG00000010109,ENSFDAG00000011430,…	Primed-enhancers_Heart_108,Primed-enhancers_Heart_11907,Primed-enhancers_Heart_12209,Primed-enhancers_Heart_12344,Primed-enhancers_Heart_13955,Primed-enhancers_Heart_13986,Primed-enhancers_Heart_13993,Primed-enhancers_Heart_14423,Primed-enhancers_Heart_14427,Primed-enhancers_Heart_14431,Primed-enhancers_Heart_14609,Primed-enhancers_Heart_14614,Primed-enhancers_Heart_15810,Primed-enhancers_Heart_1…
GO:0007264	small GTPase mediated signal transduction	1.66337	57	34.2678	0.00772	1.94214	45	23.1703	0.000802	Adcyap1r1,Akap13,Arap3,Arfgef2,Arhgap26,Arhgap32,Bcar3,Camk2d,Ccdc88c,Cdc42bpa,Cdc42se2,Cyrib,Dab2ip,Dennd3,Dgki,Dlc1,Dock4,Dock9,Dok2,Garnl3,Git1,Kitl,Notch2,Nradd,Nrg1,Prag1,Psd3,Rab12,Ralgapa2,Rapgef1,Rapgef2,Rapgef6,Rasa2,Rheb,Rhoq,Rnd1,Sh2b2,Sh2d3c,Sipa1,Spry4,Src,Srgap1,Tsc2,Vav2,Wasf2	ENSFDAG00000003230,ENSFDAG00000003839,ENSFDAG00000005299,ENSFDAG00000005790,ENSFDAG00000007578,ENSFDAG00000007589,ENSFDAG00000007919,ENSFDAG00000008084,ENSFDAG00000008256,ENSFDAG00000009181,ENSFDAG00000009280,ENSFDAG00000009473,ENSFDAG00000009617,ENSFDAG00000009699,ENSFDAG00000010074,ENSFDAG00000010798,ENSFDAG00000010998,ENSFDAG00000011003,ENSFDAG00000011303,ENSFDAG00000011579,ENSFDAG00000012660,…	Primed-enhancers_Heart_10973,Primed-enhancers_Heart_10983,Primed-enhancers_Heart_12209,Primed-enhancers_Heart_16947,Primed-enhancers_Heart_17486,Primed-enhancers_Heart_18790,Primed-enhancers_Heart_19038,Primed-enhancers_Heart_19950,Primed-enhancers_Heart_22737,Primed-enhancers_Heart_23935,Primed-enhancers_Heart_23967,Primed-enhancers_Heart_23984,Primed-enhancers_Heart_24619,Primed-enhancers_Heart…
GO:0001503	ossification	1.82706	43	23.5351	0.00772	2.2218	28	12.6024	0.00235	Acvr1,Acvr2a,Ank,Atp2b1,Atraid,Bcor,Bmp1,Bmp4,Bmp7,Chrdl2,Col2a1,Ext1,Git1,Grem1,Kremen1,Mef2c,Mmp9,Mn1,Nab1,P2ry2,Pbx1,Ptn,Runx1,Six2,Smad3,Smad7,Smurf1,Tnfsf11	ENSFDAG00000001117,ENSFDAG00000001780,ENSFDAG00000003009,ENSFDAG00000003601,ENSFDAG00000003851,ENSFDAG00000004569,ENSFDAG00000005565,ENSFDAG00000005876,ENSFDAG00000007195,ENSFDAG00000007937,ENSFDAG00000008970,ENSFDAG00000009044,ENSFDAG00000009051,ENSFDAG00000009958,ENSFDAG00000010109,ENSFDAG00000010213,ENSFDAG00000011168,ENSFDAG00000012280,ENSFDAG00000012650,ENSFDAG00000013284,ENSFDAG00000014357,…	Primed-enhancers_Heart_14423,Primed-enhancers_Heart_14427,Primed-enhancers_Heart_14431,Primed-enhancers_Heart_16230,Primed-enhancers_Heart_16231,Primed-enhancers_Heart_16928,Primed-enhancers_Heart_17137,Primed-enhancers_Heart_17969,Primed-enhancers_Heart_17975,Primed-enhancers_Heart_18461,Primed-enhancers_Heart_18491,Primed-enhancers_Heart_18506,Primed-enhancers_Heart_18509,Primed-enhancers_Heart…
GO:0009888	tissue development	1.43404	103	71.8252	0.00772	1.85612	75	40.4068	2.09e-05	Acvr1,Acvr2a,Ada,Adamts9,Ambra1,Ank,Ap3b1,Arid5b,Atp2b1,Atraid,Axin1,Bcor,Bmp4,Bmp7,Ccnt2,Chd7,Creb5,Dicer1,Dll1,Dspp,Ep300,Ext1,Fgf1,Fgfr1,Fgfr2,Foxp1,Gaa,Ghsr,Gli2,Grem1,Guca2b,Itgb6,Lama1,Lamb1,Lamb2,Lamb3,Lep,Lmx1b,Mbnl1,Mef2c,Nab1,Ncoa1,Nectin1,Nrg1,Nrp2,Ntn4,Otx2,Pax8,Pax9,Pdcd10,Pitx1,Ppp3ca,Pten,Ptn,Rarb,Sema3f,Shh,Shox2,Sirt1,Six1,Smad3,Smad4,T,Tbx3,Tbx5,Tcf7,Tfap2c,Tgfbr2,Tgm3,Tiparp,Us…	ENSFDAG00000000528,ENSFDAG00000001117,ENSFDAG00000001331,ENSFDAG00000001346,ENSFDAG00000001543,ENSFDAG00000001780,ENSFDAG00000002080,ENSFDAG00000002748,ENSFDAG00000003009,ENSFDAG00000003851,ENSFDAG00000004696,ENSFDAG00000005005,ENSFDAG00000005565,ENSFDAG00000005574,ENSFDAG00000005594,ENSFDAG00000005950,ENSFDAG00000005967,ENSFDAG00000006096,ENSFDAG00000006696,ENSFDAG00000007144,ENSFDAG00000007195,…	Primed-enhancers_Heart_10108,Primed-enhancers_Heart_10340,Primed-enhancers_Heart_10734,Primed-enhancers_Heart_11161,Primed-enhancers_Heart_11338,Primed-enhancers_Heart_12344,Primed-enhancers_Heart_14076,Primed-enhancers_Heart_14423,Primed-enhancers_Heart_14427,Primed-enhancers_Heart_14431,Primed-enhancers_Heart_14609,Primed-enhancers_Heart_14614,Primed-enhancers_Heart_15454,Primed-enhancers_Heart…
GO:0046883	regulation of hormone secretion	1.7837	47	26.3497	0.00772	2.02756	33	16.2757	0.003	Acvr1c,Acvr2a,Adcy8,BC048507,C1qtnf3,Chd7,Crh,Cry1,Ffar4,Fgfr1,Foxo1,Ghrhr,Ghsr,Gipr,Gpr68,Ildr1,Kcnq1,Lep,Lrp1,Nrg1,P2ry1,Pax8,Pde1c,Pdx1,Ppp3ca,Prkce,Runx1,Sidt2,Sirt1,Smad4,Tfr2,Tnfsf11,Trpa1	ENSFDAG00000000130,ENSFDAG00000000528,ENSFDAG00000001117,ENSFDAG00000002080,ENSFDAG00000003167,ENSFDAG00000003809,ENSFDAG00000005064,ENSFDAG00000005386,ENSFDAG00000007389,ENSFDAG00000008011,ENSFDAG00000008134,ENSFDAG00000009892,ENSFDAG00000010109,ENSFDAG00000010623,ENSFDAG00000010941,ENSFDAG00000011238,ENSFDAG00000011980,ENSFDAG00000012280,ENSFDAG00000012391,ENSFDAG00000013524,ENSFDAG00000013790,…	Primed-enhancers_Heart_12209,Primed-enhancers_Heart_12344,Primed-enhancers_Heart_135,Primed-enhancers_Heart_17137,Primed-enhancers_Heart_17728,Primed-enhancers_Heart_18814,Primed-enhancers_Heart_19038,Primed-enhancers_Heart_21313,Primed-enhancers_Heart_21978,Primed-enhancers_Heart_24541,Primed-enhancers_Heart_24557,Primed-enhancers_Heart_24564,Primed-enhancers_Heart_25928,Primed-enhancers_Heart_2…
GO:0030324	lung development	2.14272	28	13.0675	0.00794	3.89616	24	6.15992	2.23e-06	Ada,Ap3b1,Bmp4,Crh,Cux1,Dicer1,Ep300,Epas1,Fgf1,Fgfr1,Fgfr2,Foxp1,Gli2,Hmgb1,Nfib,Shh,Sim2,Stk40,Tbx4,Tbx5,Tgfbr2,Tmtc3,Vegfa,Ywhaz	ENSFDAG00000002080,ENSFDAG00000002748,ENSFDAG00000002992,ENSFDAG00000005687,ENSFDAG00000006696,ENSFDAG00000006853,ENSFDAG00000009044,ENSFDAG00000009137,ENSFDAG00000009317,ENSFDAG00000010332,ENSFDAG00000012167,ENSFDAG00000012216,ENSFDAG00000012354,ENSFDAG00000012384,ENSFDAG00000012545,ENSFDAG00000013267,ENSFDAG00000014827,ENSFDAG00000016290,ENSFDAG00000017254,ENSFDAG00000018370,ENSFDAG00000018458,…	Primed-enhancers_Heart_108,Primed-enhancers_Heart_12344,Primed-enhancers_Heart_14609,Primed-enhancers_Heart_14614,Primed-enhancers_Heart_16230,Primed-enhancers_Heart_16231,Primed-enhancers_Heart_18231,Primed-enhancers_Heart_19445,Primed-enhancers_Heart_1998,Primed-enhancers_Heart_22013,Primed-enhancers_Heart_23513,Primed-enhancers_Heart_24541,Primed-enhancers_Heart_24557,Primed-enhancers_Heart_24…
GO:0030099	myeloid cell differentiation	1.7401	49	28.1593	0.008	1.78437	36	20.1751	0.00976	Acvr2a,Ap3b1,Bmp4,Cdkn1c,Cldn18,Dll1,Ep300,Epas1,Fos,Foxp1,Gfi1b,Gpr68,Hmgb1,Itgb3,Itgb6,Kcnq1,Kitl,Kmt2e,Lep,Mb,Mef2c,Meis1,Mfap2,Myc,Nbeal2,Notch2,Ppp3ca,Ror2,Runx1,Senp1,Sirt1,Smad5,Tgfbr2,Tnfsf11,Vegfa,Zbtb46	ENSFDAG00000001117,ENSFDAG00000002748,ENSFDAG00000004238,ENSFDAG00000004839,ENSFDAG00000005626,ENSFDAG00000007652,ENSFDAG00000007714,ENSFDAG00000008064,ENSFDAG00000008970,ENSFDAG00000009044,ENSFDAG00000009085,ENSFDAG00000009317,ENSFDAG00000009892,ENSFDAG00000010109,ENSFDAG00000010623,ENSFDAG00000011032,ENSFDAG00000012280,ENSFDAG00000012354,ENSFDAG00000012384,ENSFDAG00000012456,ENSFDAG00000012688,…	Primed-enhancers_Heart_108,Primed-enhancers_Heart_11907,Primed-enhancers_Heart_12209,Primed-enhancers_Heart_13993,Primed-enhancers_Heart_14097,Primed-enhancers_Heart_14423,Primed-enhancers_Heart_14427,Primed-enhancers_Heart_14431,Primed-enhancers_Heart_14609,Primed-enhancers_Heart_14614,Primed-enhancers_Heart_16230,Primed-enhancers_Heart_16231,Primed-enhancers_Heart_17137,Primed-enhancers_Heart_1…
GO:0032874	positive regulation of stress-activated MAPK cascade	2.24539	25	11.1339	0.008	2.56646	19	7.4032	0.00412	Axin1,Bmp4,Dab2ip,Gadd45g,Hipk2,Hmgb1,Lep,Map3k1,Map3k4,Map3k5,Map3k7,Pdcd10,Sash1,Sh3rf1,Sh3rf2,Tlr3,Tnfsf11,Trpv4,Vegfa	ENSFDAG00000000501,ENSFDAG00000002571,ENSFDAG00000002748,ENSFDAG00000003960,ENSFDAG00000005242,ENSFDAG00000005950,ENSFDAG00000007144,ENSFDAG00000007378,ENSFDAG00000007962,ENSFDAG00000009044,ENSFDAG00000009317,ENSFDAG00000009437,ENSFDAG00000010109,ENSFDAG00000013461,ENSFDAG00000013790,ENSFDAG00000017614,ENSFDAG00000018113,ENSFDAG00000020994,ENSFDAG00000021114	Primed-enhancers_Heart_108,Primed-enhancers_Heart_13955,Primed-enhancers_Heart_15037,Primed-enhancers_Heart_16230,Primed-enhancers_Heart_16231,Primed-enhancers_Heart_17137,Primed-enhancers_Heart_21324,Primed-enhancers_Heart_22522,Primed-enhancers_Heart_22833,Primed-enhancers_Heart_22834,Primed-enhancers_Heart_23513,Primed-enhancers_Heart_25678,Primed-enhancers_Heart_29564,Primed-enhancers_Heart_3…
GO:0042542	response to hydrogen peroxide	2.85703	16	5.60022	0.00818	2.60769	14	5.36873	0.0133	Axl,Map3k5,Mb,Nr4a3,Pdcd10,Plekha1,Ppif,Rela,Sirpb1c,Sirt1,Src,Tnfaip3,Trpa1,Zfp277	ENSFDAG00000000432,ENSFDAG00000003960,ENSFDAG00000005600,ENSFDAG00000005950,ENSFDAG00000009004,ENSFDAG00000009028,ENSFDAG00000009892,ENSFDAG00000014814,ENSFDAG00000014880,ENSFDAG00000015133,ENSFDAG00000015145,ENSFDAG00000015250,ENSFDAG00000015893,ENSFDAG00000021085	Primed-enhancers_Heart_10973,Primed-enhancers_Heart_135,Primed-enhancers_Heart_15810,Primed-enhancers_Heart_21324,Primed-enhancers_Heart_26975,Primed-enhancers_Heart_31415,Primed-enhancers_Heart_31428,Primed-enhancers_Heart_32328,Primed-enhancers_Heart_36455,Primed-enhancers_Heart_4273,Primed-enhancers_Heart_4291,Primed-enhancers_Heart_46082,Primed-enhancers_Heart_46083,Primed-enhancers_Heart_464…
GO:0048762	mesenchymal cell differentiation	1.88886	38	20.1179	0.00855	2.62149	24	9.15511	0.000784	Acvr1,Bmp4,Bmp7,Crb2,Dab2ip,Ext1,Fermt2,Fgfr1,Fgfr2,Grem1,Kbtbd8,Mef2c,Pten,Six1,Six2,Smad3,Smad4,Smad7,Tbx3,Tgfbr2,Tsc2,Vegfa,Wnt10a,Wwtr1	ENSFDAG00000002080,ENSFDAG00000002748,ENSFDAG00000003851,ENSFDAG00000003999,ENSFDAG00000004569,ENSFDAG00000004696,ENSFDAG00000005005,ENSFDAG00000006607,ENSFDAG00000007195,ENSFDAG00000008134,ENSFDAG00000008970,ENSFDAG00000009044,ENSFDAG00000010263,ENSFDAG00000012174,ENSFDAG00000012384,ENSFDAG00000012650,ENSFDAG00000013284,ENSFDAG00000014357,ENSFDAG00000016074,ENSFDAG00000017614,ENSFDAG00000017680,…	Primed-enhancers_Heart_11338,Primed-enhancers_Heart_1168,Primed-enhancers_Heart_14423,Primed-enhancers_Heart_14427,Primed-enhancers_Heart_14431,Primed-enhancers_Heart_16223,Primed-enhancers_Heart_16230,Primed-enhancers_Heart_16231,Primed-enhancers_Heart_18461,Primed-enhancers_Heart_18491,Primed-enhancers_Heart_18506,Primed-enhancers_Heart_18509,Primed-enhancers_Heart_18511,Primed-enhancers_Heart_…
GO:1903672	positive regulation of sprouting angiogenesis	4.04236	10	2.4738	0.00867	6.1548	8	1.2998	0.00111	Bmper,Dll1,Fgf1,Ghsr,Hmgb1,Shh,Smad1,Vegfa	ENSFDAG00000002748,ENSFDAG00000006696,ENSFDAG00000009317,ENSFDAG00000010332,ENSFDAG00000014165,ENSFDAG00000014421,ENSFDAG00000016306,ENSFDAG00000019741	Primed-enhancers_Heart_108,Primed-enhancers_Heart_22618,Primed-enhancers_Heart_23513,Primed-enhancers_Heart_25595,Primed-enhancers_Heart_33319,Primed-enhancers_Heart_35202,Primed-enhancers_Heart_35209,Primed-enhancers_Heart_35211,Primed-enhancers_Heart_39730,Primed-enhancers_Heart_50976
GO:0002065	columnar/cuboidal epithelial cell differentiation	2.30231	23	9.98997	0.00977	3.2369	15	4.63407	0.00195	Bmp4,Bmp7,Cbfa2t2,Cdx2,Dll1,Dlx3,Dspp,Ext1,Fgfr2,Foxp1,Nfib,Nkx2-2,Nkx6-2,Otx2,Pdx1	ENSFDAG00000005020,ENSFDAG00000007667,ENSFDAG00000009044,ENSFDAG00000009250,ENSFDAG00000011502,ENSFDAG00000012167,ENSFDAG00000012354,ENSFDAG00000012650,ENSFDAG00000013284,ENSFDAG00000014165,ENSFDAG00000014569,ENSFDAG00000014584,ENSFDAG00000018458,ENSFDAG00000020762,ENSFDAG00000020851	Primed-enhancers_Heart_16230,Primed-enhancers_Heart_16231,Primed-enhancers_Heart_16332,Primed-enhancers_Heart_18461,Primed-enhancers_Heart_18491,Primed-enhancers_Heart_18506,Primed-enhancers_Heart_18509,Primed-enhancers_Heart_18511,Primed-enhancers_Heart_18517,Primed-enhancers_Heart_18520,Primed-enhancers_Heart_22618,Primed-enhancers_Heart_31937,Primed-enhancers_Heart_31939,Primed-enhancers_Heart…
GO:0044262	cellular carbohydrate metabolic process	1.87438	39	20.8069	0.00977	1.70024	27	15.8802	0.0426	Adcyap1r1,B4galt1,C1qtnf3,Cry1,Ep300,Ext1,Foxo1,Gaa,Gbe1,Git1,Hmgb1,Inpp5a,Inpp5e,Lep,P2ry1,P2ry6,Pcdh12,Prkag2,Prkce,Pten,Rora,Rubcnl,Sirt1,Soga1,Src,Stk40,Tpi1	ENSFDAG00000000130,ENSFDAG00000003809,ENSFDAG00000004696,ENSFDAG00000005395,ENSFDAG00000005729,ENSFDAG00000006853,ENSFDAG00000008011,ENSFDAG00000009317,ENSFDAG00000009892,ENSFDAG00000010285,ENSFDAG00000011003,ENSFDAG00000011351,ENSFDAG00000012474,ENSFDAG00000012650,ENSFDAG00000013185,ENSFDAG00000013383,ENSFDAG00000013524,ENSFDAG00000013790,ENSFDAG00000014130,ENSFDAG00000014827,ENSFDAG00000014833,…	Primed-enhancers_Heart_10108,Primed-enhancers_Heart_108,Primed-enhancers_Heart_12715,Primed-enhancers_Heart_17033,Primed-enhancers_Heart_17047,Primed-enhancers_Heart_17728,Primed-enhancers_Heart_18461,Primed-enhancers_Heart_18491,Primed-enhancers_Heart_18506,Primed-enhancers_Heart_18509,Primed-enhancers_Heart_18511,Primed-enhancers_Heart_18517,Primed-enhancers_Heart_18520,Primed-enhancers_Heart_1…
GO:0098751	bone cell development	3.63659	11	3.02481	0.00977	5.12225	11	2.14749	0.000348	Cldn18,Ep300,Foxp1,Gp1ba,Gpr68,Meis1,Nbeal2,Notch2,Src,Tnfsf11,Wasf2	ENSFDAG00000009672,ENSFDAG00000010109,ENSFDAG00000012354,ENSFDAG00000012456,ENSFDAG00000012688,ENSFDAG00000014827,ENSFDAG00000014859,ENSFDAG00000015133,ENSFDAG00000016943,ENSFDAG00000018478,ENSFDAG00000019931	Primed-enhancers_Heart_12209,Primed-enhancers_Heart_17137,Primed-enhancers_Heart_19445,Primed-enhancers_Heart_32328,Primed-enhancers_Heart_34606,Primed-enhancers_Heart_38343,Primed-enhancers_Heart_44876,Primed-enhancers_Heart_54955,Primed-enhancers_Heart_55337,Primed-enhancers_Heart_6723,Primed-enhancers_Heart_8181
GO:0032446	protein modification by small protein conjugation	1.51927	77	50.6822	0.0098	1.53647	60	39.0505	0.00994	Adgrb1,Ambra1,Axin1,Babam2,Bcor,Birc2,Bub3,Cbx4,Cbx8,Cry1,Dcun1d5,Derl1,Epas1,Fbxl3,Fbxl7,Fbxo28,Hecw1,Herc3,Herc4,Hspa5,Kbtbd8,Klhl22,Klhl24,Lonrf1,Map3k1,Med27,Med30,Mgrn1,Mylip,Otub1,Pias1,Prickle1,Prkce,Pten,Rbx1,Rela,Rnf103,Rnf139,Rnf220,Rnf40,Rybp,Sash1,Sh3rf1,Sh3rf2,Sirt1,Skp1,Smad7,Smurf1,Socs7,Spsb1,Tnfaip3,Tnks,Trim55,Trim63,Ube2h,Ube2o,Ube3b,Wwtr1,Zmiz1,Znrf3	ENSFDAG00000002313,ENSFDAG00000002916,ENSFDAG00000003999,ENSFDAG00000004474,ENSFDAG00000004696,ENSFDAG00000005238,ENSFDAG00000005242,ENSFDAG00000005362,ENSFDAG00000005523,ENSFDAG00000005798,ENSFDAG00000006105,ENSFDAG00000006525,ENSFDAG00000007089,ENSFDAG00000007144,ENSFDAG00000007494,ENSFDAG00000007717,ENSFDAG00000007962,ENSFDAG00000008011,ENSFDAG00000008528,ENSFDAG00000008742,ENSFDAG00000008754,…	Primed-enhancers_Heart_10090,Primed-enhancers_Heart_10102,Primed-enhancers_Heart_12977,Primed-enhancers_Heart_13678,Primed-enhancers_Heart_15037,Primed-enhancers_Heart_15810,Primed-enhancers_Heart_17304,Primed-enhancers_Heart_17969,Primed-enhancers_Heart_17975,Primed-enhancers_Heart_18461,Primed-enhancers_Heart_18491,Primed-enhancers_Heart_18506,Primed-enhancers_Heart_18509,Primed-enhancers_Heart…
GO:0090101	negative regulation of transmembrane receptor protein serine/threonine kinase signaling pathway	2.18674	26	11.8898	0.0098	2.11284	16	7.57274	0.0346	Acvr1,Bmper,Chrdl2,Crim1,Glg1,Grem1,Hipk2,Hspa5,Lrp1,Sirt1,Skor1,Smad7,Smurf1,Veph1,Wfikkn2,Xbp1	ENSFDAG00000000501,ENSFDAG00000003601,ENSFDAG00000003851,ENSFDAG00000007193,ENSFDAG00000007195,ENSFDAG00000007494,ENSFDAG00000009892,ENSFDAG00000010131,ENSFDAG00000010213,ENSFDAG00000012722,ENSFDAG00000016306,ENSFDAG00000017205,ENSFDAG00000017680,ENSFDAG00000017848,ENSFDAG00000018554,ENSFDAG00000018786	Primed-enhancers_Heart_24211,Primed-enhancers_Heart_24212,Primed-enhancers_Heart_26415,Primed-enhancers_Heart_26427,Primed-enhancers_Heart_29491,Primed-enhancers_Heart_29870,Primed-enhancers_Heart_29882,Primed-enhancers_Heart_29883,Primed-enhancers_Heart_29896,Primed-enhancers_Heart_31046,Primed-enhancers_Heart_33952,Primed-enhancers_Heart_35202,Primed-enhancers_Heart_35209,Primed-enhancers_Heart…
GO:0045636	positive regulation of melanocyte differentiation	5.61069	7	1.24762	0.0098	17.695	4	0.226052	0.000623	Adamts20,Adamts9,Kitl,Zeb2	ENSFDAG00000004686,ENSFDAG00000007646,ENSFDAG00000017607,ENSFDAG00000018188	Primed-enhancers_Heart_19809,Primed-enhancers_Heart_29699,Primed-enhancers_Heart_29700,Primed-enhancers_Heart_29708,Primed-enhancers_Heart_44655,Primed-enhancers_Heart_44708,Primed-enhancers_Heart_5911
GO:0022405	hair cycle process	2.35261	22	9.35131	0.0104	2.79395	15	5.36873	0.00647	Dicer1,Dlx3,Ext1,Fgfr2,Gli2,Hoxc13,Lrig1,Pdgfa,Rela,Runx1,Shh,Smad4,Tfap2c,Trps1,Wnt10a	ENSFDAG00000006696,ENSFDAG00000008134,ENSFDAG00000008197,ENSFDAG00000008613,ENSFDAG00000010263,ENSFDAG00000010309,ENSFDAG00000012104,ENSFDAG00000012280,ENSFDAG00000012545,ENSFDAG00000012650,ENSFDAG00000014474,ENSFDAG00000015145,ENSFDAG00000018458,ENSFDAG00000020762,ENSFDAG00000021287	Primed-enhancers_Heart_1168,Primed-enhancers_Heart_12344,Primed-enhancers_Heart_18413,Primed-enhancers_Heart_18461,Primed-enhancers_Heart_18491,Primed-enhancers_Heart_18506,Primed-enhancers_Heart_18509,Primed-enhancers_Heart_18511,Primed-enhancers_Heart_18517,Primed-enhancers_Heart_18520,Primed-enhancers_Heart_1998,Primed-enhancers_Heart_20191,Primed-enhancers_Heart_21978,Primed-enhancers_Heart_2…
GO:1903706	regulation of hemopoiesis	1.66814	53	31.772	0.0104	1.78288	40	22.4357	0.0065	Acvr2a,Ada,Ambra1,Ap3b1,Arid1b,Axl,Bmp4,Cd40lg,Cldn18,Cyp26b1,Dicer1,Dll1,Fos,Foxp1,Gfi1b,Gpr68,Hmgb1,Itgb3,Kitl,Lep,Mef2c,Meis1,Myc,Notch2,Ppp3ca,Ptn,Ror2,Runx1,Senp1,Sh3rf1,Shh,Smad7,Socs5,Tcf7,Tgfbr2,Tnfsf11,Xbp1,Zbtb46,Zfp608,Zmiz1	ENSFDAG00000001117,ENSFDAG00000004238,ENSFDAG00000004839,ENSFDAG00000005565,ENSFDAG00000005626,ENSFDAG00000006696,ENSFDAG00000007522,ENSFDAG00000008064,ENSFDAG00000008970,ENSFDAG00000009044,ENSFDAG00000009317,ENSFDAG00000010109,ENSFDAG00000011032,ENSFDAG00000011430,ENSFDAG00000011718,ENSFDAG00000011816,ENSFDAG00000012280,ENSFDAG00000012354,ENSFDAG00000012384,ENSFDAG00000012688,ENSFDAG00000012722,…	Primed-enhancers_Heart_108,Primed-enhancers_Heart_11907,Primed-enhancers_Heart_12209,Primed-enhancers_Heart_12344,Primed-enhancers_Heart_13993,Primed-enhancers_Heart_14423,Primed-enhancers_Heart_14427,Primed-enhancers_Heart_14431,Primed-enhancers_Heart_14609,Primed-enhancers_Heart_14614,Primed-enhancers_Heart_15810,Primed-enhancers_Heart_16230,Primed-enhancers_Heart_16231,Primed-enhancers_Heart_1…
GO:0030878	thyroid gland development	4.75382	8	1.68286	0.0107	4.42376	6	1.35631	0.0224	Hoxd3,Pax8,Shh,Six1,Six3,Smad3	ENSFDAG00000005005,ENSFDAG00000006696,ENSFDAG00000010330,ENSFDAG00000011238,ENSFDAG00000014286,ENSFDAG00000014357	Primed-enhancers_Heart_11338,Primed-enhancers_Heart_24501,Primed-enhancers_Heart_24511,Primed-enhancers_Heart_28978,Primed-enhancers_Heart_28988,Primed-enhancers_Heart_30366,Primed-enhancers_Heart_39730,Primed-enhancers_Heart_54101
GO:0060395	SMAD protein signal transduction	2.47401	19	7.67983	0.0109	3.62429	17	4.69058	0.000247	Bmp4,Bmp7,Fos,Hipk2,Itgb6,Lnpep,Lrp1,Ror2,Smad1,Smad3,Smad4,Smad5,Smad7,T,Veph1,Wwtr1,Zmiz1	ENSFDAG00000000501,ENSFDAG00000007714,ENSFDAG00000008064,ENSFDAG00000008134,ENSFDAG00000009044,ENSFDAG00000010065,ENSFDAG00000011718,ENSFDAG00000013284,ENSFDAG00000013454,ENSFDAG00000013494,ENSFDAG00000014357,ENSFDAG00000014421,ENSFDAG00000016074,ENSFDAG00000016851,ENSFDAG00000017205,ENSFDAG00000017680,ENSFDAG00000017848	Primed-enhancers_Heart_11907,Primed-enhancers_Heart_13993,Primed-enhancers_Heart_14097,Primed-enhancers_Heart_15810,Primed-enhancers_Heart_16230,Primed-enhancers_Heart_16231,Primed-enhancers_Heart_22425,Primed-enhancers_Heart_22669,Primed-enhancers_Heart_26365,Primed-enhancers_Heart_26415,Primed-enhancers_Heart_26427,Primed-enhancers_Heart_30006,Primed-enhancers_Heart_32868,Primed-enhancers_Heart…
GO:0045667	regulation of osteoblast differentiation	1.99425	31	15.5447	0.0122	2.35934	18	7.62925	0.0102	Acvr1,Acvr2a,Atraid,Bmp4,Bmp7,Crim1,Fermt2,Ffar4,Fgfr1,Grem1,Mef2c,Ppp3ca,Smad1,Smad3,Smad5,Smoc1,Vegfa,Wwtr1	ENSFDAG00000001117,ENSFDAG00000002080,ENSFDAG00000002748,ENSFDAG00000003851,ENSFDAG00000006607,ENSFDAG00000007193,ENSFDAG00000007195,ENSFDAG00000007937,ENSFDAG00000008970,ENSFDAG00000009044,ENSFDAG00000013284,ENSFDAG00000014357,ENSFDAG00000014421,ENSFDAG00000016074,ENSFDAG00000016296,ENSFDAG00000016730,ENSFDAG00000016851,ENSFDAG00000019290	Primed-enhancers_Heart_11636,Primed-enhancers_Heart_14097,Primed-enhancers_Heart_14423,Primed-enhancers_Heart_14427,Primed-enhancers_Heart_14431,Primed-enhancers_Heart_16223,Primed-enhancers_Heart_16230,Primed-enhancers_Heart_16231,Primed-enhancers_Heart_23513,Primed-enhancers_Heart_24211,Primed-enhancers_Heart_24212,Primed-enhancers_Heart_27784,Primed-enhancers_Heart_29731,Primed-enhancers_Heart…
GO:0043010	camera-type eye development	2.39063	21	8.78428	0.0124	2.94917	13	4.40801	0.00797	Bmp4,Cacna1c,Cdkn1c,Chd7,Cryba4,Lama1,Lmx1b,Mab21l2,Map3k1,Shh,Six3,Vegfa,Vsx2	ENSFDAG00000000528,ENSFDAG00000002748,ENSFDAG00000006696,ENSFDAG00000009044,ENSFDAG00000009068,ENSFDAG00000009085,ENSFDAG00000009139,ENSFDAG00000009206,ENSFDAG00000014188,ENSFDAG00000014286,ENSFDAG00000017835,ENSFDAG00000018113,ENSFDAG00000019790	Primed-enhancers_Heart_11846,Primed-enhancers_Heart_15037,Primed-enhancers_Heart_16230,Primed-enhancers_Heart_16231,Primed-enhancers_Heart_23513,Primed-enhancers_Heart_24001,Primed-enhancers_Heart_24501,Primed-enhancers_Heart_24511,Primed-enhancers_Heart_29428,Primed-enhancers_Heart_34211,Primed-enhancers_Heart_35887,Primed-enhancers_Heart_35890,Primed-enhancers_Heart_35891,Primed-enhancers_Heart…
GO:0002763	positive regulation of myeloid leukocyte differentiation	2.69314	16	5.94102	0.0124	2.60221	10	3.84288	0.0412	Fos,Gfi1b,Gpr68,Itgb3,Kitl,Notch2,Ppp3ca,Ror2,Runx1,Tnfsf11	ENSFDAG00000004238,ENSFDAG00000008064,ENSFDAG00000010109,ENSFDAG00000012280,ENSFDAG00000013494,ENSFDAG00000014842,ENSFDAG00000014859,ENSFDAG00000018188,ENSFDAG00000019290,ENSFDAG00000019931	Primed-enhancers_Heart_11907,Primed-enhancers_Heart_12209,Primed-enhancers_Heart_13993,Primed-enhancers_Heart_17137,Primed-enhancers_Heart_21978,Primed-enhancers_Heart_29180,Primed-enhancers_Heart_34606,Primed-enhancers_Heart_35368,Primed-enhancers_Heart_35370,Primed-enhancers_Heart_35392,Primed-enhancers_Heart_35396,Primed-enhancers_Heart_35419,Primed-enhancers_Heart_35421,Primed-enhancers_Heart…
GO:0043410	positive regulation of MAPK cascade	1.54231	69	44.7382	0.0126	1.91298	52	27.1828	0.00034	Adra1d,Akap13,Axin1,Bank1,Bcar3,Bmp4,Bmper,C1qtnf3,Camk2d,Ccl12,Dab2ip,Esr1,Fermt2,Ffar4,Fgf1,Fgfr1,Fgfr2,Flt1,Gadd45g,Garem1,Hipk2,Hmgb1,Itgb3,Kitl,Lep,Lrp1,Map2k5,Map3k1,Map3k4,Map3k5,Map3k7,Notch2,Nrg1,P2ry1,P2ry6,Pdcd10,Pdgfa,Prkce,Pten,Rapgef1,Rapgef2,Ror2,Sash1,Sh3rf1,Sh3rf2,Spag9,Src,Tlr3,Tnfsf11,Trpv4,Vegfa,Zeb2	ENSFDAG00000000130,ENSFDAG00000000501,ENSFDAG00000000917,ENSFDAG00000001180,ENSFDAG00000002080,ENSFDAG00000002571,ENSFDAG00000002748,ENSFDAG00000003809,ENSFDAG00000003960,ENSFDAG00000004238,ENSFDAG00000004686,ENSFDAG00000004696,ENSFDAG00000005242,ENSFDAG00000005950,ENSFDAG00000006607,ENSFDAG00000006711,ENSFDAG00000007144,ENSFDAG00000007378,ENSFDAG00000007919,ENSFDAG00000007962,ENSFDAG00000008165,…	Primed-enhancers_Heart_108,Primed-enhancers_Heart_13955,Primed-enhancers_Heart_13993,Primed-enhancers_Heart_15037,Primed-enhancers_Heart_16223,Primed-enhancers_Heart_16230,Primed-enhancers_Heart_16231,Primed-enhancers_Heart_17137,Primed-enhancers_Heart_17728,Primed-enhancers_Heart_21324,Primed-enhancers_Heart_22522,Primed-enhancers_Heart_22833,Primed-enhancers_Heart_22834,Primed-enhancers_Heart_2…
GO:1902533	positive regulation of intracellular signal transduction	1.40198	102	72.7541	0.013	1.58551	81	51.0877	0.00107	Ada,Adcyap1r1,Adra1d,Akap13,Akt3,Axin1,Axl,Bank1,Bcar3,Bid,Bmp4,Bmper,C1qtnf3,Camk2d,Ccar2,Ccl12,Cpne1,Crebbp,Crh,Dab2ip,Dgki,Ep300,Esr1,Exoc4,Fermt2,Ffar4,Fgf1,Fgfr1,Fgfr2,Flt1,Gadd45g,Garem1,Gipr,Golph3,Grem1,Hipk2,Hmgb1,Itgb3,Kitl,Klhl22,Lep,Lrp1,Lurap1l,Mad1l1,Map2k5,Map3k1,Map3k4,Map3k5,Map3k7,Myc,Nck1,Notch2,Nrg1,P2ry1,P2ry6,Pdcd10,Pdgfa,Phlpp1,Ppp3ca,Prag1,Prkce,Pten,Rapgef1,Rapgef2,Rela,R…	ENSFDAG00000000130,ENSFDAG00000000501,ENSFDAG00000000917,ENSFDAG00000001180,ENSFDAG00000001885,ENSFDAG00000002080,ENSFDAG00000002313,ENSFDAG00000002571,ENSFDAG00000002748,ENSFDAG00000003557,ENSFDAG00000003809,ENSFDAG00000003851,ENSFDAG00000003960,ENSFDAG00000004238,ENSFDAG00000004686,ENSFDAG00000004696,ENSFDAG00000004839,ENSFDAG00000005242,ENSFDAG00000005790,ENSFDAG00000005892,ENSFDAG00000005950,…	Primed-enhancers_Heart_108,Primed-enhancers_Heart_13955,Primed-enhancers_Heart_13993,Primed-enhancers_Heart_15037,Primed-enhancers_Heart_16223,Primed-enhancers_Heart_16230,Primed-enhancers_Heart_16231,Primed-enhancers_Heart_16910,Primed-enhancers_Heart_17137,Primed-enhancers_Heart_17728,Primed-enhancers_Heart_17784,Primed-enhancers_Heart_18736,Primed-enhancers_Heart_19445,Primed-enhancers_Heart_1…
GO:0032940	secretion by cell	1.40839	99	70.2928	0.0134	1.56071	74	47.4144	0.00285	Acvr1c,Acvr2a,Adcy8,Apbb1,Arfgef2,Axl,BC048507,C1qtnf3,Cacna1c,Cacna1h,Ccl12,Chd7,Cplx4,Crh,Cry1,Dgki,Dtnbp1,Exoc2,Exoc4,Exoc6b,Ffar4,Fgfr1,Foxo1,Frmd4a,Ghrhr,Ghsr,Gipr,Git1,Golph3,Gpr68,Grin2b,Grm2,Grp,Ildr1,Kcnq1,Lep,Lgi3,Lrp1,Mef2c,Mical3,Nr4a3,Nrg1,P2rx1,P2ry1,P2ry2,Pax8,Pde1c,Pdx1,Ppp3ca,Prkce,Ptprn2,Rab12,Rims1,Rims4,Runx1,Scrn1,Sergef,Sidt2,Sirt1,Slc16a10,Slc6a9,Smad4,Snx19,Sptbn2,Syt13,Tb…	ENSFDAG00000000064,ENSFDAG00000000130,ENSFDAG00000000528,ENSFDAG00000000917,ENSFDAG00000001117,ENSFDAG00000001458,ENSFDAG00000001885,ENSFDAG00000002080,ENSFDAG00000003167,ENSFDAG00000003809,ENSFDAG00000005064,ENSFDAG00000005386,ENSFDAG00000005402,ENSFDAG00000007099,ENSFDAG00000007389,ENSFDAG00000008011,ENSFDAG00000008121,ENSFDAG00000008134,ENSFDAG00000008970,ENSFDAG00000009137,ENSFDAG00000009139,…	Primed-enhancers_Heart_12209,Primed-enhancers_Heart_12344,Primed-enhancers_Heart_12673,Primed-enhancers_Heart_13268,Primed-enhancers_Heart_135,Primed-enhancers_Heart_13617,Primed-enhancers_Heart_13639,Primed-enhancers_Heart_13653,Primed-enhancers_Heart_14423,Primed-enhancers_Heart_14427,Primed-enhancers_Heart_14431,Primed-enhancers_Heart_16931,Primed-enhancers_Heart_17137,Primed-enhancers_Heart_1…
GO:0035116	embryonic hindlimb morphogenesis	2.89655	14	4.83334	0.0134	4.82592	9	1.86493	0.00236	Alx3,Bmp4,Chd7,Dicer1,Pitx1,Rarb,Shh,Tbx3,Tbx4	ENSFDAG00000000528,ENSFDAG00000002992,ENSFDAG00000006096,ENSFDAG00000006696,ENSFDAG00000009044,ENSFDAG00000012808,ENSFDAG00000019044,ENSFDAG00000019062,ENSFDAG00000021287	Primed-enhancers_Heart_12344,Primed-enhancers_Heart_14076,Primed-enhancers_Heart_15454,Primed-enhancers_Heart_16230,Primed-enhancers_Heart_16231,Primed-enhancers_Heart_34920,Primed-enhancers_Heart_34921,Primed-enhancers_Heart_35887,Primed-enhancers_Heart_35890,Primed-enhancers_Heart_35891,Primed-enhancers_Heart_35892,Primed-enhancers_Heart_39730,Primed-enhancers_Heart_41725,Primed-enhancers_Heart…
GO:0042110	T cell activation	1.61138	57	35.3734	0.0134	1.57034	41	26.109	0.0298	Ada,Ambra1,Ap3b1,Arid1b,Bid,Bmp4,Cd40lg,Chd7,Cyp26b1,Cyrib,Dicer1,Foxp1,Gadd45g,Hmgb1,Kitl,Lep,Mad1l1,Mr1,Myc,Nck1,Pax1,Ppp3ca,Prex1,Pten,Rora,Runx1,Sh3rf1,Shh,Sirpb1c,Smad3,Smad7,Socs5,Tcf7,Tgfbr2,Thy1,Tnfsf11,Tsc1,Tsc2,Xbp1,Zfp608,Zmiz1	ENSFDAG00000000528,ENSFDAG00000003557,ENSFDAG00000004696,ENSFDAG00000004839,ENSFDAG00000005395,ENSFDAG00000005600,ENSFDAG00000005603,ENSFDAG00000006063,ENSFDAG00000006696,ENSFDAG00000007429,ENSFDAG00000007522,ENSFDAG00000009044,ENSFDAG00000009317,ENSFDAG00000010109,ENSFDAG00000010798,ENSFDAG00000011430,ENSFDAG00000011718,ENSFDAG00000011816,ENSFDAG00000012280,ENSFDAG00000012354,ENSFDAG00000012384,…	Primed-enhancers_Heart_108,Primed-enhancers_Heart_12344,Primed-enhancers_Heart_13955,Primed-enhancers_Heart_14609,Primed-enhancers_Heart_14614,Primed-enhancers_Heart_15810,Primed-enhancers_Heart_16230,Primed-enhancers_Heart_16231,Primed-enhancers_Heart_17137,Primed-enhancers_Heart_18736,Primed-enhancers_Heart_18790,Primed-enhancers_Heart_21978,Primed-enhancers_Heart_22291,Primed-enhancers_Heart_2…
GO:0007423	sensory organ development	1.94978	31	15.8992	0.0139	3.0774	24	7.79879	9.36e-05	Abcb5,Bmp4,Bmp7,Cacna1c,Cdkn1c,Chd7,Cryba4,Fgfr1,Grin2b,Hmgb1,Lama1,Lmx1b,Mab21l2,Map3k1,Meis1,Pbx1,Shh,Six1,Six3,Six6,Smoc1,Vegfa,Vsx2,Wnt10a	ENSFDAG00000000528,ENSFDAG00000002080,ENSFDAG00000002748,ENSFDAG00000005005,ENSFDAG00000006696,ENSFDAG00000009044,ENSFDAG00000009068,ENSFDAG00000009085,ENSFDAG00000009139,ENSFDAG00000009206,ENSFDAG00000009317,ENSFDAG00000010263,ENSFDAG00000012688,ENSFDAG00000013284,ENSFDAG00000013603,ENSFDAG00000014188,ENSFDAG00000014286,ENSFDAG00000015008,ENSFDAG00000016296,ENSFDAG00000017835,ENSFDAG00000018008,…	Primed-enhancers_Heart_108,Primed-enhancers_Heart_11338,Primed-enhancers_Heart_11636,Primed-enhancers_Heart_1168,Primed-enhancers_Heart_11846,Primed-enhancers_Heart_12715,Primed-enhancers_Heart_15037,Primed-enhancers_Heart_16230,Primed-enhancers_Heart_16231,Primed-enhancers_Heart_23513,Primed-enhancers_Heart_24001,Primed-enhancers_Heart_24501,Primed-enhancers_Heart_24511,Primed-enhancers_Heart_29…
GO:0030511	positive regulation of transforming growth factor beta receptor signaling pathway	3.66993	10	2.72485	0.0139	3.99566	7	1.7519	0.0198	Axin1,Cdkn1c,Crebbp,Ep300,Hipk2,Smad4,Zeb2	ENSFDAG00000000501,ENSFDAG00000004686,ENSFDAG00000007144,ENSFDAG00000008134,ENSFDAG00000009085,ENSFDAG00000014534,ENSFDAG00000014827	Primed-enhancers_Heart_19445,Primed-enhancers_Heart_20271,Primed-enhancers_Heart_22833,Primed-enhancers_Heart_22834,Primed-enhancers_Heart_26365,Primed-enhancers_Heart_29699,Primed-enhancers_Heart_29700,Primed-enhancers_Heart_29708,Primed-enhancers_Heart_43546,Primed-enhancers_Heart_49456
GO:0001704	formation of primary germ layer	2.63823	16	6.06466	0.014	3.35596	11	3.27775	0.00723	Acvr1,Axin1,Bmp4,Bmp7,Crb2,Dusp4,Exoc4,Nr4a3,Smad3,T,Wls	ENSFDAG00000007144,ENSFDAG00000007195,ENSFDAG00000009044,ENSFDAG00000010065,ENSFDAG00000012174,ENSFDAG00000012199,ENSFDAG00000012403,ENSFDAG00000013284,ENSFDAG00000014357,ENSFDAG00000014814,ENSFDAG00000014885	Primed-enhancers_Heart_16230,Primed-enhancers_Heart_16231,Primed-enhancers_Heart_22425,Primed-enhancers_Heart_22833,Primed-enhancers_Heart_22834,Primed-enhancers_Heart_29601,Primed-enhancers_Heart_29870,Primed-enhancers_Heart_29882,Primed-enhancers_Heart_29883,Primed-enhancers_Heart_29896,Primed-enhancers_Heart_32868,Primed-enhancers_Heart_35803,Primed-enhancers_Heart_36455,Primed-enhancers_Heart…
GO:0009952	anterior/posterior pattern specification	1.99866	30	15.01	0.0141	2.83995	26	9.15511	0.000137	Acvr2a,Bhlhe40,Bmp4,Cdx2,Crb2,Dll1,Dmrt2,Ep300,Gli2,Hipk2,Hoxc13,Hoxc4,Hoxd3,Mllt3,Otx1,Otx2,Pax1,Pbx1,Ror2,Shh,Six3,Smad3,Smad4,T,Xrcc2,Zeb2	ENSFDAG00000000501,ENSFDAG00000001117,ENSFDAG00000004686,ENSFDAG00000006696,ENSFDAG00000007429,ENSFDAG00000007667,ENSFDAG00000008134,ENSFDAG00000009044,ENSFDAG00000010065,ENSFDAG00000010309,ENSFDAG00000010330,ENSFDAG00000011158,ENSFDAG00000011502,ENSFDAG00000012150,ENSFDAG00000012169,ENSFDAG00000012174,ENSFDAG00000012545,ENSFDAG00000013494,ENSFDAG00000013549,ENSFDAG00000014165,ENSFDAG00000014286,…	Primed-enhancers_Heart_13993,Primed-enhancers_Heart_16230,Primed-enhancers_Heart_16231,Primed-enhancers_Heart_16332,Primed-enhancers_Heart_19445,Primed-enhancers_Heart_1998,Primed-enhancers_Heart_20191,Primed-enhancers_Heart_20204,Primed-enhancers_Heart_22425,Primed-enhancers_Heart_22618,Primed-enhancers_Heart_24501,Primed-enhancers_Heart_24511,Primed-enhancers_Heart_26365,Primed-enhancers_Heart_…
GO:0007628	adult walking behavior	2.62125	16	6.10397	0.0148	3.0774	8	2.5996	0.0362	Axin1,Cacna1c,Chd7,Hipk2,Mapt,Npc1,Scn1a,Sptbn4	ENSFDAG00000000501,ENSFDAG00000000528,ENSFDAG00000004247,ENSFDAG00000007144,ENSFDAG00000008358,ENSFDAG00000009139,ENSFDAG00000009997,ENSFDAG00000016452	Primed-enhancers_Heart_22833,Primed-enhancers_Heart_22834,Primed-enhancers_Heart_24959,Primed-enhancers_Heart_30103,Primed-enhancers_Heart_35887,Primed-enhancers_Heart_35890,Primed-enhancers_Heart_35891,Primed-enhancers_Heart_35892,Primed-enhancers_Heart_43546,Primed-enhancers_Heart_45388,Primed-enhancers_Heart_45433,Primed-enhancers_Heart_45437,Primed-enhancers_Heart_45463,Primed-enhancers_Heart…
GO:1903131	mononuclear cell differentiation	1.62978	53	32.5198	0.0148	1.7652	41	23.2268	0.0067	Ada,Ambra1,Ap3b1,Arid1b,Axl,Bmp4,Cd40lg,Chd7,Cyp26b1,Dicer1,Dll1,Ep300,Foxp1,Gadd45g,Gpr68,Hmgb1,Itgb6,Lep,Mef2c,Mr1,Myc,Nfil3,Notch2,Pax1,Pbx1,Prex1,Rora,Runx1,Sh3rf1,Shh,Smad7,Socs5,Tcf7,Tgfbr2,Tnfaip3,Tsc1,Vegfa,Xbp1,Zbtb46,Zfp608,Zmiz1	ENSFDAG00000000528,ENSFDAG00000000997,ENSFDAG00000002748,ENSFDAG00000004839,ENSFDAG00000005395,ENSFDAG00000005603,ENSFDAG00000005626,ENSFDAG00000006063,ENSFDAG00000006696,ENSFDAG00000007429,ENSFDAG00000007522,ENSFDAG00000007714,ENSFDAG00000008970,ENSFDAG00000009028,ENSFDAG00000009044,ENSFDAG00000009317,ENSFDAG00000011430,ENSFDAG00000011718,ENSFDAG00000011816,ENSFDAG00000012280,ENSFDAG00000012354,…	Primed-enhancers_Heart_108,Primed-enhancers_Heart_12209,Primed-enhancers_Heart_12344,Primed-enhancers_Heart_13955,Primed-enhancers_Heart_13986,Primed-enhancers_Heart_13993,Primed-enhancers_Heart_14423,Primed-enhancers_Heart_14427,Primed-enhancers_Heart_14431,Primed-enhancers_Heart_14609,Primed-enhancers_Heart_14614,Primed-enhancers_Heart_15810,Primed-enhancers_Heart_16230,Primed-enhancers_Heart_1…
GO:0090257	regulation of muscle system process	1.77437	41	23.1068	0.0154	1.7695	23	12.998	0.0452	Ada,Atp2b1,Cacna1c,Cacna1h,Camk2d,Dock4,Flt1,Foxo1,Foxp1,Ghsr,Jarid2,Kcnq1,Mef2c,Nr4a3,P2rx1,Ppp3ca,Prok2,Sirt1,Smad3,Smad4,Smad7,Trim63,Trpv4	ENSFDAG00000000295,ENSFDAG00000001780,ENSFDAG00000008134,ENSFDAG00000008165,ENSFDAG00000008754,ENSFDAG00000008970,ENSFDAG00000009139,ENSFDAG00000009181,ENSFDAG00000009892,ENSFDAG00000010377,ENSFDAG00000010623,ENSFDAG00000011544,ENSFDAG00000012354,ENSFDAG00000013461,ENSFDAG00000013718,ENSFDAG00000014357,ENSFDAG00000014814,ENSFDAG00000015056,ENSFDAG00000017680,ENSFDAG00000018798,ENSFDAG00000019290,…	Primed-enhancers_Heart_10973,Primed-enhancers_Heart_10983,Primed-enhancers_Heart_13617,Primed-enhancers_Heart_13639,Primed-enhancers_Heart_13653,Primed-enhancers_Heart_14423,Primed-enhancers_Heart_14427,Primed-enhancers_Heart_14431,Primed-enhancers_Heart_22774,Primed-enhancers_Heart_26365,Primed-enhancers_Heart_26415,Primed-enhancers_Heart_26427,Primed-enhancers_Heart_32564,Primed-enhancers_Heart…
GO:0048589	developmental growth	1.39076	102	73.341	0.0155	1.84798	73	39.5026	3.24e-05	Akap13,Arid5b,Bcan,Bin3,Bmp4,Cacna1c,Cadm1,Camk2d,Cdkn1c,Chd7,Cpne1,Dicer1,Disc1,Dll1,Dspp,Ep300,Esr1,Ext1,Fgf1,Fgfr1,Fgfr2,Flrt1,Foxp1,Ghrhr,Ghsr,Gli2,Guca2b,Islr2,Itsn2,Jarid2,Klf5,Lamb2,Lep,Lmx1b,Lrp1,Map7,Mapt,Mef2c,Meis1,Mex3c,Notch2,Nrg1,Nrp2,Plekha1,Pten,Ptn,Rarb,Rims1,Sema3f,Sema6a,Shh,Sirt1,Six1,Six3,Slc12a5,Smad3,Smad4,Smad7,Smurf1,Sorbs2,Sptbn2,Sptbn4,Src,St8sia2,Stk40,Tbx5,Tgfbr2,Tmtc…	ENSFDAG00000000295,ENSFDAG00000000362,ENSFDAG00000000432,ENSFDAG00000000528,ENSFDAG00000000589,ENSFDAG00000001346,ENSFDAG00000001543,ENSFDAG00000002080,ENSFDAG00000002748,ENSFDAG00000004686,ENSFDAG00000004696,ENSFDAG00000004856,ENSFDAG00000005005,ENSFDAG00000005064,ENSFDAG00000005565,ENSFDAG00000005687,ENSFDAG00000006096,ENSFDAG00000006323,ENSFDAG00000006696,ENSFDAG00000006853,ENSFDAG00000007633,…	Primed-enhancers_Heart_10340,Primed-enhancers_Heart_11338,Primed-enhancers_Heart_12344,Primed-enhancers_Heart_13617,Primed-enhancers_Heart_13639,Primed-enhancers_Heart_13653,Primed-enhancers_Heart_14423,Primed-enhancers_Heart_14427,Primed-enhancers_Heart_14431,Primed-enhancers_Heart_15454,Primed-enhancers_Heart_15810,Primed-enhancers_Heart_16230,Primed-enhancers_Heart_16231,Primed-enhancers_Heart…
GO:0045765	regulation of angiogenesis	1.71573	45	26.2278	0.0155	2.20401	35	15.8802	0.000565	Adamts9,Adgra2,Adgrb1,Akt3,Bmper,Dab2ip,Dll1,Erap1,Fgf1,Flt1,Ghsr,Grem1,Hhip,Hipk2,Hmgb1,Itgb3,Lep,Mmp9,Pak4,Pdcd10,Ppp1r16b,Ptn,Ptprm,Reck,Runx1,Sash1,Sema6a,Shh,Sirt1,Smad1,Tafa5,Tgfbr2,Tlr3,Vegfa,Xbp1	ENSFDAG00000000501,ENSFDAG00000000823,ENSFDAG00000002748,ENSFDAG00000003851,ENSFDAG00000004238,ENSFDAG00000005242,ENSFDAG00000005565,ENSFDAG00000005950,ENSFDAG00000006696,ENSFDAG00000008165,ENSFDAG00000009317,ENSFDAG00000009437,ENSFDAG00000009892,ENSFDAG00000010332,ENSFDAG00000010853,ENSFDAG00000011352,ENSFDAG00000011869,ENSFDAG00000012280,ENSFDAG00000012384,ENSFDAG00000012722,ENSFDAG00000013109,…	Primed-enhancers_Heart_108,Primed-enhancers_Heart_19072,Primed-enhancers_Heart_19702,Primed-enhancers_Heart_21324,Primed-enhancers_Heart_21978,Primed-enhancers_Heart_22618,Primed-enhancers_Heart_22669,Primed-enhancers_Heart_23513,Primed-enhancers_Heart_23935,Primed-enhancers_Heart_23967,Primed-enhancers_Heart_23984,Primed-enhancers_Heart_24001,Primed-enhancers_Heart_25595,Primed-enhancers_Heart_2…
GO:0061138	morphogenesis of a branching epithelium	1.75673	41	23.3388	0.0159	2.64514	29	10.9635	0.000147	Acvr1,B4galt1,Bmp4,Bmp7,Dicer1,Dspp,Esr1,Ext1,Fgfr1,Fgfr2,Flt1,Gli2,Grem1,Hhip,Lama1,Myc,Ntn4,Pax8,Pbx1,Pdgfa,Pkd1,Shh,Six1,Six2,Smad4,Src,Tbx3,Tgfbr2,Vegfa	ENSFDAG00000002080,ENSFDAG00000002748,ENSFDAG00000003851,ENSFDAG00000004569,ENSFDAG00000004839,ENSFDAG00000005005,ENSFDAG00000006696,ENSFDAG00000007195,ENSFDAG00000008134,ENSFDAG00000008165,ENSFDAG00000009044,ENSFDAG00000009080,ENSFDAG00000010853,ENSFDAG00000011238,ENSFDAG00000012384,ENSFDAG00000012545,ENSFDAG00000012650,ENSFDAG00000013185,ENSFDAG00000013284,ENSFDAG00000014474,ENSFDAG00000015133,…	Primed-enhancers_Heart_11338,Primed-enhancers_Heart_12344,Primed-enhancers_Heart_16230,Primed-enhancers_Heart_16231,Primed-enhancers_Heart_18461,Primed-enhancers_Heart_18491,Primed-enhancers_Heart_18506,Primed-enhancers_Heart_18509,Primed-enhancers_Heart_18511,Primed-enhancers_Heart_18517,Primed-enhancers_Heart_18520,Primed-enhancers_Heart_18736,Primed-enhancers_Heart_1998,Primed-enhancers_Heart_…
GO:0051056	regulation of small GTPase mediated signal transduction	1.80662	37	20.4803	0.0161	2.28323	28	12.2633	0.00164	Adcyap1r1,Akap13,Arap3,Arfgef2,Arhgap26,Camk2d,Cdc42bpa,Cdc42se2,Cyrib,Dab2ip,Dennd3,Dgki,Dlc1,Garnl3,Git1,Kitl,Notch2,Nrg1,Prag1,Psd3,Ralgapa2,Rapgef1,Rasa2,Sh2b2,Sipa1,Spry4,Src,Tsc2	ENSFDAG00000003839,ENSFDAG00000005790,ENSFDAG00000007589,ENSFDAG00000008256,ENSFDAG00000009280,ENSFDAG00000009473,ENSFDAG00000010074,ENSFDAG00000010798,ENSFDAG00000010998,ENSFDAG00000011003,ENSFDAG00000011303,ENSFDAG00000012660,ENSFDAG00000013386,ENSFDAG00000013643,ENSFDAG00000014736,ENSFDAG00000014859,ENSFDAG00000015056,ENSFDAG00000015133,ENSFDAG00000015464,ENSFDAG00000015508,ENSFDAG00000015929,…	Primed-enhancers_Heart_18790,Primed-enhancers_Heart_19038,Primed-enhancers_Heart_22737,Primed-enhancers_Heart_25537,Primed-enhancers_Heart_25542,Primed-enhancers_Heart_25595,Primed-enhancers_Heart_25608,Primed-enhancers_Heart_25609,Primed-enhancers_Heart_26975,Primed-enhancers_Heart_29209,Primed-enhancers_Heart_29229,Primed-enhancers_Heart_29389,Primed-enhancers_Heart_29564,Primed-enhancers_Heart…
GO:0046888	negative regulation of hormone secretion	2.34894	20	8.51446	0.0164	2.46908	12	4.86012	0.0318	Acvr1c,Crh,Cry1,Ffar4,Foxo1,Ghsr,Kcnq1,Lep,Nrg1,Pde1c,Ppp3ca,Sirt1	ENSFDAG00000003167,ENSFDAG00000005386,ENSFDAG00000008011,ENSFDAG00000009892,ENSFDAG00000010623,ENSFDAG00000013790,ENSFDAG00000016730,ENSFDAG00000018370,ENSFDAG00000019290,ENSFDAG00000019741,ENSFDAG00000019969,ENSFDAG00000020383	Primed-enhancers_Heart_25928,Primed-enhancers_Heart_27784,Primed-enhancers_Heart_29870,Primed-enhancers_Heart_33235,Primed-enhancers_Heart_33319,Primed-enhancers_Heart_33684,Primed-enhancers_Heart_33702,Primed-enhancers_Heart_35368,Primed-enhancers_Heart_35370,Primed-enhancers_Heart_35392,Primed-enhancers_Heart_35396,Primed-enhancers_Heart_35419,Primed-enhancers_Heart_35421,Primed-enhancers_Heart…
GO:0043408	regulation of MAPK cascade	1.43393	88	61.37	0.017	1.80883	69	38.1463	0.000122	Adra1d,Akap13,Axin1,Bank1,Bcar3,Bmp4,Bmp7,Bmper,C1qtnf3,Camk2d,Ccl12,Dab2ip,Dok2,Dusp4,Esr1,Fermt2,Ffar4,Fgf1,Fgfr1,Fgfr2,Flt1,Foxo1,Gadd45g,Garem1,Grin2b,Hipk2,Hmgb1,Hrh4,Itgb3,Kitl,Lep,Lrp1,Map2k5,Map3k1,Map3k4,Map3k5,Map3k7,Notch2,Nrg1,P2ry1,P2ry6,Pak4,Pdcd10,Pdgfa,Phlpp1,Prdm11,Prkce,Pten,Rapgef1,Rapgef2,Ror2,Sash1,Sema6a,Sh3rf1,Sh3rf2,Sirpb1c,Smad4,Spag9,Spry4,Src,Stk40,Tlr3,Tnfsf11,Trpv4,Ts…	ENSFDAG00000000130,ENSFDAG00000000501,ENSFDAG00000000917,ENSFDAG00000001180,ENSFDAG00000002080,ENSFDAG00000002571,ENSFDAG00000002748,ENSFDAG00000003809,ENSFDAG00000003960,ENSFDAG00000004238,ENSFDAG00000004686,ENSFDAG00000004696,ENSFDAG00000005242,ENSFDAG00000005600,ENSFDAG00000005950,ENSFDAG00000006607,ENSFDAG00000006711,ENSFDAG00000006853,ENSFDAG00000007144,ENSFDAG00000007378,ENSFDAG00000007919,…	Primed-enhancers_Heart_108,Primed-enhancers_Heart_13955,Primed-enhancers_Heart_13993,Primed-enhancers_Heart_15037,Primed-enhancers_Heart_16223,Primed-enhancers_Heart_16230,Primed-enhancers_Heart_16231,Primed-enhancers_Heart_16947,Primed-enhancers_Heart_17137,Primed-enhancers_Heart_17728,Primed-enhancers_Heart_18231,Primed-enhancers_Heart_1947,Primed-enhancers_Heart_21324,Primed-enhancers_Heart_22…
GO:2000109	regulation of macrophage apoptotic process	5.74804	6	1.04383	0.017	6.43456	4	0.621643	0.0275	Ghsr,Mef2c,Pten,Sirt1	ENSFDAG00000004696,ENSFDAG00000008970,ENSFDAG00000009892,ENSFDAG00000019741	Primed-enhancers_Heart_14423,Primed-enhancers_Heart_14427,Primed-enhancers_Heart_14431,Primed-enhancers_Heart_27681,Primed-enhancers_Heart_33319,Primed-enhancers_Heart_5067
GO:0048754	branching morphogenesis of an epithelial tube	1.79202	38	21.2051	0.0177	2.77151	26	9.38116	0.000182	Acvr1,B4galt1,Bmp4,Bmp7,Dicer1,Dspp,Esr1,Ext1,Fgfr2,Flt1,Gli2,Grem1,Hhip,Lama1,Myc,Pax8,Pbx1,Pkd1,Shh,Six1,Six2,Smad4,Src,Tbx3,Tgfbr2,Vegfa	ENSFDAG00000002748,ENSFDAG00000003851,ENSFDAG00000004569,ENSFDAG00000004839,ENSFDAG00000005005,ENSFDAG00000006696,ENSFDAG00000007195,ENSFDAG00000008134,ENSFDAG00000008165,ENSFDAG00000009044,ENSFDAG00000010853,ENSFDAG00000011238,ENSFDAG00000012384,ENSFDAG00000012545,ENSFDAG00000012650,ENSFDAG00000013185,ENSFDAG00000013284,ENSFDAG00000015133,ENSFDAG00000017835,ENSFDAG00000018008,ENSFDAG00000018458,…	Primed-enhancers_Heart_11338,Primed-enhancers_Heart_12344,Primed-enhancers_Heart_16230,Primed-enhancers_Heart_16231,Primed-enhancers_Heart_18461,Primed-enhancers_Heart_18491,Primed-enhancers_Heart_18506,Primed-enhancers_Heart_18509,Primed-enhancers_Heart_18511,Primed-enhancers_Heart_18517,Primed-enhancers_Heart_18520,Primed-enhancers_Heart_18736,Primed-enhancers_Heart_1998,Primed-enhancers_Heart_…
GO:1902107	positive regulation of leukocyte differentiation	1.91952	30	15.6289	0.0177	2.13082	23	10.794	0.00925	Ada,Ambra1,Ap3b1,Arid1b,Axl,Cd40lg,Fos,Gfi1b,Gpr68,Hmgb1,Itgb3,Kitl,Notch2,Ppp3ca,Ror2,Runx1,Shh,Socs5,Tgfbr2,Tnfsf11,Xbp1,Zbtb46,Zmiz1	ENSFDAG00000004238,ENSFDAG00000005626,ENSFDAG00000006696,ENSFDAG00000008064,ENSFDAG00000009317,ENSFDAG00000010109,ENSFDAG00000011718,ENSFDAG00000011816,ENSFDAG00000012280,ENSFDAG00000012384,ENSFDAG00000012722,ENSFDAG00000013494,ENSFDAG00000014842,ENSFDAG00000014859,ENSFDAG00000015740,ENSFDAG00000015893,ENSFDAG00000015972,ENSFDAG00000016290,ENSFDAG00000016496,ENSFDAG00000018188,ENSFDAG00000018798,…	Primed-enhancers_Heart_108,Primed-enhancers_Heart_11907,Primed-enhancers_Heart_12209,Primed-enhancers_Heart_13993,Primed-enhancers_Heart_14609,Primed-enhancers_Heart_14614,Primed-enhancers_Heart_15810,Primed-enhancers_Heart_17137,Primed-enhancers_Heart_21978,Primed-enhancers_Heart_22291,Primed-enhancers_Heart_24624,Primed-enhancers_Heart_29180,Primed-enhancers_Heart_30616,Primed-enhancers_Heart_3…
GO:0048705	skeletal system morphogenesis	2.00737	27	13.4505	0.0177	3.04587	21	6.89459	0.000309	Alx3,Arid5b,Axin1,Bmp4,Bmp7,Col2a1,Fgfr2,Hhip,Hoxc4,Hoxd3,Mef2c,Myc,Plekha1,Recql4,Shox2,Six1,Six2,Smad3,Tbx4,Tgfbr2,Tiparp	ENSFDAG00000000432,ENSFDAG00000001543,ENSFDAG00000002992,ENSFDAG00000004569,ENSFDAG00000004839,ENSFDAG00000005005,ENSFDAG00000005594,ENSFDAG00000007144,ENSFDAG00000008747,ENSFDAG00000008970,ENSFDAG00000009044,ENSFDAG00000010330,ENSFDAG00000010853,ENSFDAG00000011158,ENSFDAG00000011168,ENSFDAG00000012384,ENSFDAG00000012808,ENSFDAG00000013284,ENSFDAG00000014357,ENSFDAG00000014917,ENSFDAG00000018458	Primed-enhancers_Heart_11338,Primed-enhancers_Heart_14423,Primed-enhancers_Heart_14427,Primed-enhancers_Heart_14431,Primed-enhancers_Heart_16230,Primed-enhancers_Heart_16231,Primed-enhancers_Heart_18736,Primed-enhancers_Heart_19169,Primed-enhancers_Heart_19933,Primed-enhancers_Heart_20204,Primed-enhancers_Heart_22833,Primed-enhancers_Heart_22834,Primed-enhancers_Heart_24511,Primed-enhancers_Heart…
GO:1905563	negative regulation of vascular endothelial cell proliferation	5.65842	6	1.06037	0.0177	10.1115	4	0.395591	0.00694	Ccl12,Flt1,Mef2c,Tsc2	ENSFDAG00000000917,ENSFDAG00000008165,ENSFDAG00000008970,ENSFDAG00000018495	Primed-enhancers_Heart_14423,Primed-enhancers_Heart_14427,Primed-enhancers_Heart_14431,Primed-enhancers_Heart_22737,Primed-enhancers_Heart_42629,Primed-enhancers_Heart_8670
GO:0000165	MAPK cascade	1.39923	95	67.8942	0.0177	1.76712	74	41.8761	0.000122	Adra1d,Akap13,Axin1,Bank1,Bcar3,Bmp4,Bmp7,Bmper,C1qtnf3,Camk2d,Ccl12,Dab2ip,Dok2,Dusp4,Esr1,Fermt2,Ffar4,Fgf1,Fgfr1,Fgfr2,Flt1,Foxo1,Gadd45g,Garem1,Grin2b,Hipk2,Hmgb1,Hrh4,Itgb3,Kitl,Lep,Lrp1,Map2k5,Map3k1,Map3k4,Map3k5,Map3k6,Map3k7,Mef2c,Myc,Notch2,Nrg1,P2ry1,P2ry6,Pak4,Pdcd10,Pdgfa,Phlpp1,Prdm11,Prkce,Pten,Rapgef1,Rapgef2,Ror2,Sash1,Sema6a,Sh3rf1,Sh3rf2,Sirpb1c,Smad1,Smad3,Smad4,Spag9,Spry4,Sr…	ENSFDAG00000000130,ENSFDAG00000000501,ENSFDAG00000000917,ENSFDAG00000001180,ENSFDAG00000002080,ENSFDAG00000002571,ENSFDAG00000002748,ENSFDAG00000003809,ENSFDAG00000003960,ENSFDAG00000004238,ENSFDAG00000004686,ENSFDAG00000004696,ENSFDAG00000004839,ENSFDAG00000005242,ENSFDAG00000005600,ENSFDAG00000005950,ENSFDAG00000006607,ENSFDAG00000006711,ENSFDAG00000006853,ENSFDAG00000007144,ENSFDAG00000007378,…	Primed-enhancers_Heart_108,Primed-enhancers_Heart_13955,Primed-enhancers_Heart_13993,Primed-enhancers_Heart_14423,Primed-enhancers_Heart_14427,Primed-enhancers_Heart_14431,Primed-enhancers_Heart_15037,Primed-enhancers_Heart_16223,Primed-enhancers_Heart_16230,Primed-enhancers_Heart_16231,Primed-enhancers_Heart_16947,Primed-enhancers_Heart_17137,Primed-enhancers_Heart_17728,Primed-enhancers_Heart_1…
GO:0030510	regulation of BMP signaling pathway	2.21679	21	9.47317	0.0179	2.50039	13	5.1992	0.0237	Bmp4,Bmper,Chrdl2,Crb2,Crim1,Grem1,Hipk2,Notch2,Skor1,Smad4,Smad7,Smurf1,Ube2o	ENSFDAG00000000501,ENSFDAG00000003601,ENSFDAG00000003851,ENSFDAG00000004474,ENSFDAG00000007193,ENSFDAG00000008134,ENSFDAG00000009044,ENSFDAG00000010213,ENSFDAG00000012174,ENSFDAG00000014859,ENSFDAG00000016306,ENSFDAG00000017680,ENSFDAG00000018554	Primed-enhancers_Heart_16230,Primed-enhancers_Heart_16231,Primed-enhancers_Heart_24211,Primed-enhancers_Heart_24212,Primed-enhancers_Heart_26365,Primed-enhancers_Heart_26415,Primed-enhancers_Heart_26427,Primed-enhancers_Heart_29601,Primed-enhancers_Heart_31046,Primed-enhancers_Heart_34606,Primed-enhancers_Heart_35202,Primed-enhancers_Heart_35209,Primed-enhancers_Heart_35211,Primed-enhancers_Heart…
GO:0060272	embryonic skeletal joint morphogenesis	4.74763	7	1.47442	0.0179	7.37294	5	0.678156	0.00703	Axin1,Bmp4,Bmp7,Col2a1,Shox2	ENSFDAG00000005594,ENSFDAG00000007144,ENSFDAG00000009044,ENSFDAG00000011168,ENSFDAG00000013284	Primed-enhancers_Heart_16230,Primed-enhancers_Heart_16231,Primed-enhancers_Heart_19933,Primed-enhancers_Heart_22833,Primed-enhancers_Heart_22834,Primed-enhancers_Heart_32868,Primed-enhancers_Heart_33952
GO:0070647	protein modification by small protein conjugation or removal	1.44308	83	57.516	0.0179	1.41126	65	46.0581	0.0308	Adgrb1,Ambra1,Axin1,Babam2,Bcor,Birc2,Bub3,Cbx4,Cbx8,Cry1,Dcun1d5,Derl1,Epas1,Fbxl3,Fbxl7,Fbxo28,Hecw1,Herc3,Herc4,Hspa5,Kbtbd8,Klhl22,Klhl24,Lonrf1,Map3k1,Med27,Med30,Mgrn1,Mylip,Otub1,Pias1,Prickle1,Prkce,Pten,Rbx1,Rela,Rnf103,Rnf139,Rnf220,Rnf40,Rybp,Sash1,Senp1,Senp6,Sh3rf1,Sh3rf2,Shmt2,Sirt1,Skp1,Smad7,Smurf1,Socs7,Spsb1,Tnfaip3,Tnks,Trim55,Trim63,Ube2h,Ube2o,Ube3b,Usp19,Usp25,Wwtr1,Zmiz1,Zn…	ENSFDAG00000002313,ENSFDAG00000002916,ENSFDAG00000003999,ENSFDAG00000004474,ENSFDAG00000004696,ENSFDAG00000005238,ENSFDAG00000005242,ENSFDAG00000005362,ENSFDAG00000005523,ENSFDAG00000005798,ENSFDAG00000005967,ENSFDAG00000006105,ENSFDAG00000006525,ENSFDAG00000007089,ENSFDAG00000007144,ENSFDAG00000007494,ENSFDAG00000007717,ENSFDAG00000007962,ENSFDAG00000008011,ENSFDAG00000008528,ENSFDAG00000008742,…	Primed-enhancers_Heart_10090,Primed-enhancers_Heart_10102,Primed-enhancers_Heart_12977,Primed-enhancers_Heart_13678,Primed-enhancers_Heart_15037,Primed-enhancers_Heart_15810,Primed-enhancers_Heart_17304,Primed-enhancers_Heart_17969,Primed-enhancers_Heart_17975,Primed-enhancers_Heart_18461,Primed-enhancers_Heart_18491,Primed-enhancers_Heart_18506,Primed-enhancers_Heart_18509,Primed-enhancers_Heart…
GO:0010596	negative regulation of endothelial cell migration	2.44187	17	6.96189	0.0179	2.65426	9	3.39078	0.0485	Adamts9,Adgrb1,Dab2ip,Hmgb1,Map2k5,Mef2c,Pdcd10,Ptprm,Robo4	ENSFDAG00000005950,ENSFDAG00000008970,ENSFDAG00000009107,ENSFDAG00000009317,ENSFDAG00000011352,ENSFDAG00000017607,ENSFDAG00000017614,ENSFDAG00000021090,ENSFDAG00000021459	Primed-enhancers_Heart_108,Primed-enhancers_Heart_14423,Primed-enhancers_Heart_14427,Primed-enhancers_Heart_14431,Primed-enhancers_Heart_19072,Primed-enhancers_Heart_21324,Primed-enhancers_Heart_23935,Primed-enhancers_Heart_23967,Primed-enhancers_Heart_23984,Primed-enhancers_Heart_24001,Primed-enhancers_Heart_29564,Primed-enhancers_Heart_44655,Primed-enhancers_Heart_44708,Primed-enhancers_Heart_5…
GO:0001935	endothelial cell proliferation	1.9498	29	14.8733	0.0179	2.17117	20	9.21162	0.0135	Akt3,Bmp4,Bmper,Ccl12,Dicer1,Fgfr1,Flt1,Ghsr,Hmgb1,Itgb3,Lep,Mef2c,Pdcd10,Ppp1r16b,Prok2,Ptprm,Sirt1,Tsc2,Vegfa,Xbp1	ENSFDAG00000000917,ENSFDAG00000002080,ENSFDAG00000002748,ENSFDAG00000004238,ENSFDAG00000005950,ENSFDAG00000008165,ENSFDAG00000008970,ENSFDAG00000009044,ENSFDAG00000009317,ENSFDAG00000009892,ENSFDAG00000011352,ENSFDAG00000012722,ENSFDAG00000013109,ENSFDAG00000013718,ENSFDAG00000013790,ENSFDAG00000016306,ENSFDAG00000018495,ENSFDAG00000018752,ENSFDAG00000019741,ENSFDAG00000021287	Primed-enhancers_Heart_108,Primed-enhancers_Heart_12344,Primed-enhancers_Heart_14423,Primed-enhancers_Heart_14427,Primed-enhancers_Heart_14431,Primed-enhancers_Heart_16230,Primed-enhancers_Heart_16231,Primed-enhancers_Heart_21324,Primed-enhancers_Heart_22737,Primed-enhancers_Heart_23513,Primed-enhancers_Heart_23935,Primed-enhancers_Heart_23967,Primed-enhancers_Heart_23984,Primed-enhancers_Heart_2…
GO:1903362	regulation of cellular protein catabolic process	1.86343	32	17.1726	0.0181	2.12644	28	13.1675	0.00394	Anks1,Axin1,Ccar2,Dab2ip,Disc1,Hipk2,Laptm4b,Lrp1,Mylip,Pias1,Pkd1,Prickle1,Pten,Rbx1,Rnf139,Rnf40,Rybp,Senp1,Sh3rf1,Sh3rf2,Shh,Smad7,Smurf1,Socs5,Tmtc3,Usp19,Usp25,Xbp1	ENSFDAG00000000501,ENSFDAG00000000589,ENSFDAG00000004696,ENSFDAG00000005687,ENSFDAG00000005967,ENSFDAG00000006696,ENSFDAG00000007144,ENSFDAG00000007962,ENSFDAG00000008825,ENSFDAG00000009969,ENSFDAG00000010213,ENSFDAG00000011032,ENSFDAG00000012183,ENSFDAG00000012722,ENSFDAG00000012933,ENSFDAG00000013121,ENSFDAG00000015033,ENSFDAG00000015059,ENSFDAG00000016496,ENSFDAG00000017209,ENSFDAG00000017614,…	Primed-enhancers_Heart_13678,Primed-enhancers_Heart_16910,Primed-enhancers_Heart_18143,Primed-enhancers_Heart_18636,Primed-enhancers_Heart_19445,Primed-enhancers_Heart_19809,Primed-enhancers_Heart_19933,Primed-enhancers_Heart_21746,Primed-enhancers_Heart_21749,Primed-enhancers_Heart_22737,Primed-enhancers_Heart_22833,Primed-enhancers_Heart_22834,Primed-enhancers_Heart_22925,Primed-enhancers_Heart…
GO:0071711	basement membrane organization	2.83292	13	4.5889	0.0186	3.25961	7	2.14749	0.0423	Ext1,Flrt2,Lama1,Lamb1,Lamb2,Lamb3,Ntn4	ENSFDAG00000001530,ENSFDAG00000008752,ENSFDAG00000009080,ENSFDAG00000010302,ENSFDAG00000012019,ENSFDAG00000012650,ENSFDAG00000017835	Primed-enhancers_Heart_10734,Primed-enhancers_Heart_12042,Primed-enhancers_Heart_18461,Primed-enhancers_Heart_18491,Primed-enhancers_Heart_18506,Primed-enhancers_Heart_18509,Primed-enhancers_Heart_18511,Primed-enhancers_Heart_18517,Primed-enhancers_Heart_18520,Primed-enhancers_Heart_24001,Primed-enhancers_Heart_3820,Primed-enhancers_Heart_55247,Primed-enhancers_Heart_5745
GO:1902105	regulation of leukocyte differentiation	1.69632	43	25.3489	0.0205	1.85377	33	17.8016	0.00898	Ada,Ambra1,Ap3b1,Arid1b,Axl,Bmp4,Cd40lg,Cldn18,Cyp26b1,Dicer1,Fos,Foxp1,Gfi1b,Gpr68,Hmgb1,Itgb3,Kitl,Myc,Notch2,Ppp3ca,Ror2,Runx1,Sh3rf1,Shh,Smad7,Socs5,Tcf7,Tgfbr2,Tnfsf11,Xbp1,Zbtb46,Zfp608,Zmiz1	ENSFDAG00000004238,ENSFDAG00000004839,ENSFDAG00000005626,ENSFDAG00000006696,ENSFDAG00000007522,ENSFDAG00000008064,ENSFDAG00000009044,ENSFDAG00000009317,ENSFDAG00000010109,ENSFDAG00000011430,ENSFDAG00000011718,ENSFDAG00000011816,ENSFDAG00000012280,ENSFDAG00000012354,ENSFDAG00000012384,ENSFDAG00000012722,ENSFDAG00000013494,ENSFDAG00000014842,ENSFDAG00000014859,ENSFDAG00000015740,ENSFDAG00000015893,…	Primed-enhancers_Heart_108,Primed-enhancers_Heart_11907,Primed-enhancers_Heart_12209,Primed-enhancers_Heart_12344,Primed-enhancers_Heart_13993,Primed-enhancers_Heart_14609,Primed-enhancers_Heart_14614,Primed-enhancers_Heart_15810,Primed-enhancers_Heart_16230,Primed-enhancers_Heart_16231,Primed-enhancers_Heart_17137,Primed-enhancers_Heart_18736,Primed-enhancers_Heart_21978,Primed-enhancers_Heart_2…
GO:0050863	regulation of T cell activation	1.69809	43	25.3226	0.0205	1.69829	31	18.2537	0.0298	Ada,Ambra1,Ap3b1,Arid1b,Bid,Bmp4,Cd40lg,Cyp26b1,Cyrib,Dicer1,Hmgb1,Kitl,Lep,Mad1l1,Nck1,Ppp3ca,Pten,Runx1,Sh3rf1,Shh,Sirpb1c,Smad7,Socs5,Tcf7,Tgfbr2,Thy1,Tnfsf11,Tsc2,Xbp1,Zfp608,Zmiz1	ENSFDAG00000003557,ENSFDAG00000004696,ENSFDAG00000005600,ENSFDAG00000006696,ENSFDAG00000007522,ENSFDAG00000009044,ENSFDAG00000009317,ENSFDAG00000010109,ENSFDAG00000010798,ENSFDAG00000011430,ENSFDAG00000011718,ENSFDAG00000011816,ENSFDAG00000012280,ENSFDAG00000012384,ENSFDAG00000012722,ENSFDAG00000013790,ENSFDAG00000015740,ENSFDAG00000015972,ENSFDAG00000016092,ENSFDAG00000016290,ENSFDAG00000016496,…	Primed-enhancers_Heart_108,Primed-enhancers_Heart_12344,Primed-enhancers_Heart_14609,Primed-enhancers_Heart_14614,Primed-enhancers_Heart_15810,Primed-enhancers_Heart_16230,Primed-enhancers_Heart_16231,Primed-enhancers_Heart_17137,Primed-enhancers_Heart_18790,Primed-enhancers_Heart_21978,Primed-enhancers_Heart_22291,Primed-enhancers_Heart_22737,Primed-enhancers_Heart_24624,Primed-enhancers_Heart_2…
GO:0060349	bone morphogenesis	2.79313	13	4.65427	0.0205	3.25961	7	2.14749	0.0423	Cyp26b1,Dspp,Ext1,Fgfr2,Glg1,Pax1,T	ENSFDAG00000007429,ENSFDAG00000010065,ENSFDAG00000010131,ENSFDAG00000011430,ENSFDAG00000012650,ENSFDAG00000018458,ENSFDAG00000020851	Primed-enhancers_Heart_18461,Primed-enhancers_Heart_18491,Primed-enhancers_Heart_18506,Primed-enhancers_Heart_18509,Primed-enhancers_Heart_18511,Primed-enhancers_Heart_18517,Primed-enhancers_Heart_18520,Primed-enhancers_Heart_22425,Primed-enhancers_Heart_31939,Primed-enhancers_Heart_41120,Primed-enhancers_Heart_44306,Primed-enhancers_Heart_48945,Primed-enhancers_Heart_51737
GO:0070169	positive regulation of biomineral tissue development	2.45638	16	6.51364	0.0213	3.53901	10	2.82565	0.00816	Acvr1,Acvr2a,Atp2b1,Atraid,Bmp4,Bmp7,Dspp,Mef2c,Ptn,Smad3	ENSFDAG00000001117,ENSFDAG00000001780,ENSFDAG00000005565,ENSFDAG00000007195,ENSFDAG00000007937,ENSFDAG00000008970,ENSFDAG00000009044,ENSFDAG00000013284,ENSFDAG00000014357,ENSFDAG00000020851	Primed-enhancers_Heart_14423,Primed-enhancers_Heart_14427,Primed-enhancers_Heart_14431,Primed-enhancers_Heart_16230,Primed-enhancers_Heart_16231,Primed-enhancers_Heart_29731,Primed-enhancers_Heart_29870,Primed-enhancers_Heart_29882,Primed-enhancers_Heart_29883,Primed-enhancers_Heart_29896,Primed-enhancers_Heart_32868,Primed-enhancers_Heart_41120,Primed-enhancers_Heart_43467,Primed-enhancers_Heart…
GO:0035239	tube morphogenesis	1.47918	71	47.9995	0.0219	2.09941	49	23.3399	8.45e-05	Acvr1,Adamts9,Adgrb1,Akt3,B4galt1,Bmp4,Bmp7,Chd7,Dab2ip,Dicer1,Dll1,Dspp,Ephb3,Esr1,Ext1,Fgf1,Fgfr1,Fgfr2,Flt1,Foxp1,Gli2,Grem1,Hhip,Lama1,Lbx1,Lrp1,Mef2c,Meis1,Myc,Notch2,Nr4a3,Pax8,Pbx1,Pkd1,Ptn,Ptprm,Sema6a,Shh,Six1,Six2,Smad3,Smad4,Smad7,Src,Tafa5,Tbx3,Tgfbr2,Vegfa,Zmiz1	ENSFDAG00000000528,ENSFDAG00000002080,ENSFDAG00000002748,ENSFDAG00000003851,ENSFDAG00000004569,ENSFDAG00000004839,ENSFDAG00000005005,ENSFDAG00000005565,ENSFDAG00000006696,ENSFDAG00000007195,ENSFDAG00000008134,ENSFDAG00000008165,ENSFDAG00000008970,ENSFDAG00000009044,ENSFDAG00000010248,ENSFDAG00000010332,ENSFDAG00000010853,ENSFDAG00000011238,ENSFDAG00000011352,ENSFDAG00000011718,ENSFDAG00000012354,…	Primed-enhancers_Heart_11338,Primed-enhancers_Heart_12344,Primed-enhancers_Heart_14423,Primed-enhancers_Heart_14427,Primed-enhancers_Heart_14431,Primed-enhancers_Heart_15810,Primed-enhancers_Heart_16230,Primed-enhancers_Heart_16231,Primed-enhancers_Heart_18461,Primed-enhancers_Heart_18491,Primed-enhancers_Heart_18506,Primed-enhancers_Heart_18509,Primed-enhancers_Heart_18511,Primed-enhancers_Heart…
GO:0001568	blood vessel development	1.89998	30	15.7896	0.0222	2.13766	18	8.42044	0.0229	Bmp4,Bmper,Cdx2,Chd7,Dlx3,Foxo1,Lep,Lrp1,Mef2c,Notch2,Pkd1,Prickle1,Prok2,Rapgef1,Rapgef2,Shh,Tbx3,Vegfa	ENSFDAG00000000528,ENSFDAG00000002748,ENSFDAG00000006696,ENSFDAG00000007919,ENSFDAG00000008970,ENSFDAG00000009044,ENSFDAG00000010074,ENSFDAG00000011502,ENSFDAG00000013718,ENSFDAG00000013790,ENSFDAG00000014859,ENSFDAG00000016306,ENSFDAG00000017848,ENSFDAG00000018888,ENSFDAG00000019062,ENSFDAG00000020339,ENSFDAG00000020383,ENSFDAG00000020762	Primed-enhancers_Heart_14423,Primed-enhancers_Heart_14427,Primed-enhancers_Heart_14431,Primed-enhancers_Heart_16230,Primed-enhancers_Heart_16231,Primed-enhancers_Heart_19809,Primed-enhancers_Heart_22737,Primed-enhancers_Heart_23513,Primed-enhancers_Heart_29209,Primed-enhancers_Heart_29229,Primed-enhancers_Heart_33684,Primed-enhancers_Heart_33702,Primed-enhancers_Heart_34043,Primed-enhancers_Heart…
GO:0001649	osteoblast differentiation	1.77761	35	19.6893	0.0222	2.12727	22	10.3419	0.0108	Acvr1,Acvr2a,Atraid,Bmp4,Bmp7,Crim1,Fermt2,Ffar4,Fgfr1,Gli2,Grem1,Map3k7,Mef2c,Ppp3ca,Shox2,Smad1,Smad3,Smad4,Smad5,Smoc1,Vegfa,Wwtr1	ENSFDAG00000001117,ENSFDAG00000002080,ENSFDAG00000002571,ENSFDAG00000002748,ENSFDAG00000003851,ENSFDAG00000005594,ENSFDAG00000006607,ENSFDAG00000007193,ENSFDAG00000007195,ENSFDAG00000007937,ENSFDAG00000008134,ENSFDAG00000008970,ENSFDAG00000009044,ENSFDAG00000012545,ENSFDAG00000013284,ENSFDAG00000014357,ENSFDAG00000014421,ENSFDAG00000016074,ENSFDAG00000016296,ENSFDAG00000016730,ENSFDAG00000016851,…	Primed-enhancers_Heart_11636,Primed-enhancers_Heart_14097,Primed-enhancers_Heart_14423,Primed-enhancers_Heart_14427,Primed-enhancers_Heart_14431,Primed-enhancers_Heart_16223,Primed-enhancers_Heart_16230,Primed-enhancers_Heart_16231,Primed-enhancers_Heart_1998,Primed-enhancers_Heart_23513,Primed-enhancers_Heart_24211,Primed-enhancers_Heart_24212,Primed-enhancers_Heart_26365,Primed-enhancers_Heart_…
GO:0090100	positive regulation of transmembrane receptor protein serine/threonine kinase signaling pathway	2.14965	22	10.2342	0.0222	2.50402	15	5.99038	0.0135	Acvr1,Acvr2a,Axin1,Bmp4,Bmp7,Cdkn1c,Crb2,Crebbp,Ep300,Hipk2,Notch2,Smad4,Tgfbr2,Ube2o,Zeb2	ENSFDAG00000000501,ENSFDAG00000001117,ENSFDAG00000004474,ENSFDAG00000004686,ENSFDAG00000007144,ENSFDAG00000007195,ENSFDAG00000008134,ENSFDAG00000009044,ENSFDAG00000009085,ENSFDAG00000012174,ENSFDAG00000012384,ENSFDAG00000013284,ENSFDAG00000014534,ENSFDAG00000014827,ENSFDAG00000014859	Primed-enhancers_Heart_16230,Primed-enhancers_Heart_16231,Primed-enhancers_Heart_19445,Primed-enhancers_Heart_20271,Primed-enhancers_Heart_22833,Primed-enhancers_Heart_22834,Primed-enhancers_Heart_26365,Primed-enhancers_Heart_29601,Primed-enhancers_Heart_29699,Primed-enhancers_Heart_29700,Primed-enhancers_Heart_29708,Primed-enhancers_Heart_29731,Primed-enhancers_Heart_29870,Primed-enhancers_Heart…
GO:0045639	positive regulation of myeloid cell differentiation	2.19904	20	9.09486	0.0222	2.17015	13	5.99038	0.05	Acvr2a,Fos,Gfi1b,Gpr68,Hmgb1,Itgb3,Kitl,Lep,Notch2,Ppp3ca,Ror2,Runx1,Tnfsf11	ENSFDAG00000001117,ENSFDAG00000004238,ENSFDAG00000008064,ENSFDAG00000009317,ENSFDAG00000010109,ENSFDAG00000012280,ENSFDAG00000013494,ENSFDAG00000013790,ENSFDAG00000014842,ENSFDAG00000014859,ENSFDAG00000018188,ENSFDAG00000019290,ENSFDAG00000019931	Primed-enhancers_Heart_108,Primed-enhancers_Heart_11907,Primed-enhancers_Heart_12209,Primed-enhancers_Heart_13993,Primed-enhancers_Heart_17137,Primed-enhancers_Heart_21978,Primed-enhancers_Heart_29180,Primed-enhancers_Heart_29731,Primed-enhancers_Heart_34606,Primed-enhancers_Heart_35368,Primed-enhancers_Heart_35370,Primed-enhancers_Heart_35392,Primed-enhancers_Heart_35396,Primed-enhancers_Heart_3…
GO:0044257	cellular protein catabolic process	1.80591	33	18.2733	0.0224	2.04445	29	14.1848	0.00531	Anks1,Axin1,Ccar2,Dab2ip,Disc1,Hipk2,Laptm4b,Lrp1,Mylip,Pias1,Pkd1,Prickle1,Pten,Rbx1,Rnf139,Rnf40,Rybp,Senp1,Sh3rf1,Sh3rf2,Shh,Smad7,Smurf1,Socs5,Tmtc3,Usp19,Usp25,Xbp1,Yme1l1	ENSFDAG00000000501,ENSFDAG00000000589,ENSFDAG00000000659,ENSFDAG00000004696,ENSFDAG00000005687,ENSFDAG00000005967,ENSFDAG00000006696,ENSFDAG00000007144,ENSFDAG00000007962,ENSFDAG00000008825,ENSFDAG00000009969,ENSFDAG00000010213,ENSFDAG00000011032,ENSFDAG00000012183,ENSFDAG00000012722,ENSFDAG00000012933,ENSFDAG00000013121,ENSFDAG00000015033,ENSFDAG00000015059,ENSFDAG00000016496,ENSFDAG00000017209,…	Primed-enhancers_Heart_12739,Primed-enhancers_Heart_13678,Primed-enhancers_Heart_16910,Primed-enhancers_Heart_18143,Primed-enhancers_Heart_18636,Primed-enhancers_Heart_19445,Primed-enhancers_Heart_19809,Primed-enhancers_Heart_19933,Primed-enhancers_Heart_21746,Primed-enhancers_Heart_21749,Primed-enhancers_Heart_22737,Primed-enhancers_Heart_22833,Primed-enhancers_Heart_22834,Primed-enhancers_Heart…
GO:0048534	hematopoietic or lymphoid organ development	1.49877	66	44.0361	0.0227	1.61764	49	30.291	0.0102	Acvr2a,Ada,Ambra1,Ap3b1,Arid1b,Axl,Bmp4,Cd40lg,Cldn18,Cyp26b1,Dicer1,Dll1,Epas1,Ephb3,Fos,Foxp1,Gfi1b,Gpr68,Hmgb1,Itgb3,Jarid2,Kitl,Lep,Mad1l1,Mef2c,Meis1,Myc,Notch2,Pax1,Pbx1,Ppp3ca,Ptn,Ror2,Runx1,Senp1,Sh3rf1,Shh,Six1,Smad7,Socs5,Tcf7,Tgfbr2,Tiparp,Tlx1,Tnfsf11,Xbp1,Zbtb46,Zfp608,Zmiz1	ENSFDAG00000000295,ENSFDAG00000001117,ENSFDAG00000004238,ENSFDAG00000004839,ENSFDAG00000005005,ENSFDAG00000005565,ENSFDAG00000005626,ENSFDAG00000006696,ENSFDAG00000007429,ENSFDAG00000007522,ENSFDAG00000008064,ENSFDAG00000008747,ENSFDAG00000008970,ENSFDAG00000009044,ENSFDAG00000009317,ENSFDAG00000010109,ENSFDAG00000010154,ENSFDAG00000010248,ENSFDAG00000011032,ENSFDAG00000011430,ENSFDAG00000011718,…	Primed-enhancers_Heart_108,Primed-enhancers_Heart_11338,Primed-enhancers_Heart_11907,Primed-enhancers_Heart_12209,Primed-enhancers_Heart_12344,Primed-enhancers_Heart_13617,Primed-enhancers_Heart_13639,Primed-enhancers_Heart_13653,Primed-enhancers_Heart_13993,Primed-enhancers_Heart_14423,Primed-enhancers_Heart_14427,Primed-enhancers_Heart_14431,Primed-enhancers_Heart_14609,Primed-enhancers_Heart_1…
GO:0001890	placenta development	3.25398	10	3.07316	0.0227	3.01192	8	2.65611	0.0399	Ada,Birc2,Cdkn1c,Cdx2,Dlx3,Lep,Map3k4,Notch2	ENSFDAG00000007378,ENSFDAG00000009085,ENSFDAG00000011502,ENSFDAG00000013790,ENSFDAG00000014859,ENSFDAG00000018798,ENSFDAG00000020762,ENSFDAG00000020987	Primed-enhancers_Heart_22522,Primed-enhancers_Heart_32564,Primed-enhancers_Heart_34606,Primed-enhancers_Heart_42604,Primed-enhancers_Heart_43074,Primed-enhancers_Heart_43087,Primed-enhancers_Heart_49456,Primed-enhancers_Heart_52525,Primed-enhancers_Heart_9035,Primed-enhancers_Heart_9036
GO:0017015	regulation of transforming growth factor beta receptor signaling pathway	2.10006	22	10.4759	0.0252	2.46908	18	7.29018	0.00718	Axin1,Cdkn1c,Crebbp,Ep300,Glg1,Hipk2,Hspa5,Lrp1,Nrep,Sirt1,Smad3,Smad4,Smad7,Smurf1,Veph1,Wfikkn2,Xbp1,Zeb2	ENSFDAG00000000501,ENSFDAG00000004686,ENSFDAG00000007144,ENSFDAG00000007494,ENSFDAG00000008134,ENSFDAG00000009085,ENSFDAG00000009892,ENSFDAG00000010131,ENSFDAG00000010213,ENSFDAG00000012722,ENSFDAG00000014357,ENSFDAG00000014464,ENSFDAG00000014534,ENSFDAG00000014827,ENSFDAG00000017205,ENSFDAG00000017680,ENSFDAG00000017848,ENSFDAG00000018786	Primed-enhancers_Heart_19445,Primed-enhancers_Heart_20271,Primed-enhancers_Heart_22833,Primed-enhancers_Heart_22834,Primed-enhancers_Heart_25316,Primed-enhancers_Heart_26365,Primed-enhancers_Heart_26415,Primed-enhancers_Heart_26427,Primed-enhancers_Heart_29491,Primed-enhancers_Heart_29699,Primed-enhancers_Heart_29700,Primed-enhancers_Heart_29708,Primed-enhancers_Heart_33952,Primed-enhancers_Heart…
GO:0070301	cellular response to hydrogen peroxide	2.81118	12	4.26866	0.0262	3.13944	11	3.50381	0.0107	Axl,Map3k5,Plekha1,Ppif,Rela,Sirpb1c,Sirt1,Src,Tnfaip3,Trpa1,Zfp277	ENSFDAG00000000432,ENSFDAG00000003960,ENSFDAG00000005600,ENSFDAG00000009004,ENSFDAG00000009028,ENSFDAG00000009892,ENSFDAG00000014880,ENSFDAG00000015133,ENSFDAG00000015145,ENSFDAG00000015893,ENSFDAG00000021085	Primed-enhancers_Heart_10973,Primed-enhancers_Heart_135,Primed-enhancers_Heart_15810,Primed-enhancers_Heart_26975,Primed-enhancers_Heart_31415,Primed-enhancers_Heart_31428,Primed-enhancers_Heart_32328,Primed-enhancers_Heart_4273,Primed-enhancers_Heart_4291,Primed-enhancers_Heart_46412,Primed-enhancers_Heart_48988,Primed-enhancers_Heart_5067
GO:0045165	cell fate commitment	1.68853	40	23.6892	0.0264	2.54131	27	10.6244	0.000465	Acvr1,Bmp4,Dll1,Epas1,Ext1,Fgfr1,Fgfr2,Lbx1,Mef2c,Nkx2-2,Nkx6-2,Nrg1,Otx2,Pitx1,Ror2,Runx1,Shh,Smad1,Smad4,Smad5,Tbx3,Tbx5,Tfap2c,Tlx1,Vsx2,Wnt10a,Zfp521	ENSFDAG00000002080,ENSFDAG00000005020,ENSFDAG00000006696,ENSFDAG00000007195,ENSFDAG00000007667,ENSFDAG00000008134,ENSFDAG00000008613,ENSFDAG00000008970,ENSFDAG00000009044,ENSFDAG00000009250,ENSFDAG00000010154,ENSFDAG00000010263,ENSFDAG00000012216,ENSFDAG00000012280,ENSFDAG00000012650,ENSFDAG00000013494,ENSFDAG00000014165,ENSFDAG00000014188,ENSFDAG00000014421,ENSFDAG00000016560,ENSFDAG00000016851,…	Primed-enhancers_Heart_1168,Primed-enhancers_Heart_11846,Primed-enhancers_Heart_13993,Primed-enhancers_Heart_14076,Primed-enhancers_Heart_14097,Primed-enhancers_Heart_14423,Primed-enhancers_Heart_14427,Primed-enhancers_Heart_14431,Primed-enhancers_Heart_16230,Primed-enhancers_Heart_16231,Primed-enhancers_Heart_16332,Primed-enhancers_Heart_18461,Primed-enhancers_Heart_18491,Primed-enhancers_Heart_…
GO:0034505	tooth mineralization	3.14254	10	3.18214	0.0278	4.42376	8	1.80842	0.007	Ank,Bcor,Dicer1,Dspp,Fgfr1,Itgb6,Nectin1,Wls	ENSFDAG00000002080,ENSFDAG00000003009,ENSFDAG00000005574,ENSFDAG00000007714,ENSFDAG00000012403,ENSFDAG00000019082,ENSFDAG00000020851,ENSFDAG00000021287	Primed-enhancers_Heart_12344,Primed-enhancers_Heart_17969,Primed-enhancers_Heart_17975,Primed-enhancers_Heart_30006,Primed-enhancers_Heart_35803,Primed-enhancers_Heart_41120,Primed-enhancers_Heart_49981,Primed-enhancers_Heart_53269,Primed-enhancers_Heart_53275,Primed-enhancers_Heart_55816
GO:0035265	organ growth	1.75537	34	19.3691	0.0289	2.28323	20	8.75951	0.00898	Cacna1c,Dll1,Dspp,Esr1,Ext1,Fgfr1,Fgfr2,Foxp1,Jarid2,Lep,Lmx1b,Map7,Mef2c,Meis1,Nrg1,Pten,Shh,Sirt1,Tbx5,Tgfbr2	ENSFDAG00000000295,ENSFDAG00000002080,ENSFDAG00000004696,ENSFDAG00000006696,ENSFDAG00000008966,ENSFDAG00000008970,ENSFDAG00000009068,ENSFDAG00000009139,ENSFDAG00000009892,ENSFDAG00000012216,ENSFDAG00000012354,ENSFDAG00000012384,ENSFDAG00000012650,ENSFDAG00000012688,ENSFDAG00000013790,ENSFDAG00000014165,ENSFDAG00000018458,ENSFDAG00000019132,ENSFDAG00000019969,ENSFDAG00000020851	Primed-enhancers_Heart_13617,Primed-enhancers_Heart_13639,Primed-enhancers_Heart_13653,Primed-enhancers_Heart_14423,Primed-enhancers_Heart_14427,Primed-enhancers_Heart_14431,Primed-enhancers_Heart_18461,Primed-enhancers_Heart_18491,Primed-enhancers_Heart_18506,Primed-enhancers_Heart_18509,Primed-enhancers_Heart_18511,Primed-enhancers_Heart_18517,Primed-enhancers_Heart_18520,Primed-enhancers_Heart…
GO:0030501	positive regulation of bone mineralization	2.42331	15	6.18989	0.0296	3.7918	9	2.37355	0.00898	Acvr1,Acvr2a,Atp2b1,Atraid,Bmp4,Bmp7,Mef2c,Ptn,Smad3	ENSFDAG00000001117,ENSFDAG00000001780,ENSFDAG00000005565,ENSFDAG00000007195,ENSFDAG00000007937,ENSFDAG00000008970,ENSFDAG00000009044,ENSFDAG00000013284,ENSFDAG00000014357	Primed-enhancers_Heart_14423,Primed-enhancers_Heart_14427,Primed-enhancers_Heart_14431,Primed-enhancers_Heart_16230,Primed-enhancers_Heart_16231,Primed-enhancers_Heart_29731,Primed-enhancers_Heart_29870,Primed-enhancers_Heart_29882,Primed-enhancers_Heart_29883,Primed-enhancers_Heart_29896,Primed-enhancers_Heart_32868,Primed-enhancers_Heart_43467,Primed-enhancers_Heart_50754,Primed-enhancers_Heart…
GO:0001944	vasculature development	1.59815	48	30.0348	0.0298	2.0524	37	18.0276	0.0012	Adamts9,Adgra2,Adgrb1,Akt3,Bmp4,Bmper,Dab2ip,Dll1,Erap1,Fgf1,Flt1,Ghsr,Grem1,Hhip,Hipk2,Hmgb1,Immp2l,Itgb3,Lep,Mmp9,Pak4,Pdcd10,Ppp1r16b,Ptn,Ptprm,Reck,Runx1,Sash1,Sema6a,Shh,Sirt1,Smad1,Tafa5,Tgfbr2,Tlr3,Vegfa,Xbp1	ENSFDAG00000000501,ENSFDAG00000000823,ENSFDAG00000002748,ENSFDAG00000003851,ENSFDAG00000004238,ENSFDAG00000005242,ENSFDAG00000005565,ENSFDAG00000005950,ENSFDAG00000006696,ENSFDAG00000008165,ENSFDAG00000009044,ENSFDAG00000009317,ENSFDAG00000009437,ENSFDAG00000009892,ENSFDAG00000010332,ENSFDAG00000010853,ENSFDAG00000011352,ENSFDAG00000011869,ENSFDAG00000012280,ENSFDAG00000012384,ENSFDAG00000012722,…	Primed-enhancers_Heart_108,Primed-enhancers_Heart_10983,Primed-enhancers_Heart_16230,Primed-enhancers_Heart_16231,Primed-enhancers_Heart_19072,Primed-enhancers_Heart_19702,Primed-enhancers_Heart_21324,Primed-enhancers_Heart_21978,Primed-enhancers_Heart_22618,Primed-enhancers_Heart_22669,Primed-enhancers_Heart_23513,Primed-enhancers_Heart_23935,Primed-enhancers_Heart_23967,Primed-enhancers_Heart_2…
GO:1900745	positive regulation of p38MAPK cascade	3.3403	9	2.69437	0.0298	3.93223	6	1.52585	0.0331	Bmp4,Gadd45g,Lep,Map3k4,Sash1,Vegfa	ENSFDAG00000002748,ENSFDAG00000005242,ENSFDAG00000007378,ENSFDAG00000009044,ENSFDAG00000013790,ENSFDAG00000021114	Primed-enhancers_Heart_13955,Primed-enhancers_Heart_16230,Primed-enhancers_Heart_16231,Primed-enhancers_Heart_22522,Primed-enhancers_Heart_23513,Primed-enhancers_Heart_4050,Primed-enhancers_Heart_4070,Primed-enhancers_Heart_43074,Primed-enhancers_Heart_43087
GO:0060441	epithelial tube branching involved in lung morphogenesis	2.60907	13	4.98261	0.0298	3.7918	6	1.58236	0.038	Bmp4,Ext1,Fgfr2,Hhip,Lama1,Shh	ENSFDAG00000006696,ENSFDAG00000009044,ENSFDAG00000010853,ENSFDAG00000012650,ENSFDAG00000017835,ENSFDAG00000018458	Primed-enhancers_Heart_16230,Primed-enhancers_Heart_16231,Primed-enhancers_Heart_18461,Primed-enhancers_Heart_18491,Primed-enhancers_Heart_18506,Primed-enhancers_Heart_18509,Primed-enhancers_Heart_18511,Primed-enhancers_Heart_18517,Primed-enhancers_Heart_18520,Primed-enhancers_Heart_24001,Primed-enhancers_Heart_39730,Primed-enhancers_Heart_48945,Primed-enhancers_Heart_50986
GO:0070167	regulation of biomineral tissue development	2.11593	21	9.92471	0.0298	2.72231	14	5.14268	0.00986	Acvr1,Acvr2a,Ank,Atp2b1,Atraid,Bcor,Bmp4,Bmp7,Dicer1,Dspp,Grem1,Mef2c,Ptn,Smad3	ENSFDAG00000001117,ENSFDAG00000001780,ENSFDAG00000003009,ENSFDAG00000003851,ENSFDAG00000005565,ENSFDAG00000007195,ENSFDAG00000007937,ENSFDAG00000008970,ENSFDAG00000009044,ENSFDAG00000013284,ENSFDAG00000014357,ENSFDAG00000019082,ENSFDAG00000020851,ENSFDAG00000021287	Primed-enhancers_Heart_12344,Primed-enhancers_Heart_14423,Primed-enhancers_Heart_14427,Primed-enhancers_Heart_14431,Primed-enhancers_Heart_16230,Primed-enhancers_Heart_16231,Primed-enhancers_Heart_17969,Primed-enhancers_Heart_17975,Primed-enhancers_Heart_29731,Primed-enhancers_Heart_29870,Primed-enhancers_Heart_29882,Primed-enhancers_Heart_29883,Primed-enhancers_Heart_29896,Primed-enhancers_Heart…
GO:0090596	sensory organ morphogenesis	2.23177	18	8.06535	0.0303	3.23994	13	4.01242	0.00433	Bmp4,Bmp7,Chd7,Col8a2,Cyp26b1,Flt1,Hipk2,Hoxc13,Mfap2,Nectin1,Rarb,Shh,Vegfa	ENSFDAG00000000501,ENSFDAG00000000528,ENSFDAG00000001830,ENSFDAG00000002748,ENSFDAG00000005574,ENSFDAG00000006096,ENSFDAG00000006696,ENSFDAG00000008165,ENSFDAG00000009044,ENSFDAG00000010309,ENSFDAG00000011430,ENSFDAG00000012984,ENSFDAG00000013284	Primed-enhancers_Heart_15454,Primed-enhancers_Heart_16230,Primed-enhancers_Heart_16231,Primed-enhancers_Heart_20191,Primed-enhancers_Heart_23513,Primed-enhancers_Heart_32868,Primed-enhancers_Heart_35887,Primed-enhancers_Heart_35890,Primed-enhancers_Heart_35891,Primed-enhancers_Heart_35892,Primed-enhancers_Heart_38059,Primed-enhancers_Heart_38762,Primed-enhancers_Heart_39730,Primed-enhancers_Heart…
GO:0045785	positive regulation of cell adhesion	1.49712	61	40.7448	0.031	1.77723	46	25.883	0.00339	Ada,Ambra1,Ap3b1,Arid1b,Bmp7,Cd40lg,Cyrib,Dicer1,Disc1,Fermt2,Gp1ba,Hmgb1,Itgb3,Kitl,Lama1,Lamb1,Lamb2,Lep,Magi1,Mex3b,Myo10,Nck1,Nr4a3,Nrg1,Ppp3ca,Prex1,Prkce,Ptn,Rela,Runx1,Shh,Sirpb1c,Smad3,Smad7,Smoc1,Socs5,Src,Tgfbr2,Thy1,Tnfsf11,Tsc1,Tsc2,Vegfa,Xbp1,Zfhx3,Zmiz1	ENSFDAG00000000589,ENSFDAG00000002748,ENSFDAG00000004238,ENSFDAG00000005565,ENSFDAG00000005600,ENSFDAG00000006063,ENSFDAG00000006607,ENSFDAG00000006696,ENSFDAG00000009317,ENSFDAG00000009672,ENSFDAG00000010109,ENSFDAG00000010302,ENSFDAG00000010798,ENSFDAG00000011718,ENSFDAG00000011816,ENSFDAG00000012019,ENSFDAG00000012280,ENSFDAG00000012384,ENSFDAG00000012722,ENSFDAG00000013284,ENSFDAG00000013524,…	Primed-enhancers_Heart_10734,Primed-enhancers_Heart_108,Primed-enhancers_Heart_11636,Primed-enhancers_Heart_12344,Primed-enhancers_Heart_14609,Primed-enhancers_Heart_14614,Primed-enhancers_Heart_15810,Primed-enhancers_Heart_16223,Primed-enhancers_Heart_17137,Primed-enhancers_Heart_17894,Primed-enhancers_Heart_18790,Primed-enhancers_Heart_21978,Primed-enhancers_Heart_22291,Primed-enhancers_Heart_2…
GO:0021978	telencephalon regionalization	4.64461	6	1.29182	0.0329	8.84752	4	0.452104	0.0102	Bmp4,Otx2,Shh,Six3	ENSFDAG00000006696,ENSFDAG00000007667,ENSFDAG00000009044,ENSFDAG00000014286	Primed-enhancers_Heart_16230,Primed-enhancers_Heart_16231,Primed-enhancers_Heart_16332,Primed-enhancers_Heart_24501,Primed-enhancers_Heart_24511,Primed-enhancers_Heart_39730
GO:0097168	mesenchymal stem cell proliferation	5.63815	5	0.886815	0.0335	8.84752	3	0.339078	0.0318	Bmp4,Fermt2,Six2	ENSFDAG00000004569,ENSFDAG00000006607,ENSFDAG00000009044	Primed-enhancers_Heart_16223,Primed-enhancers_Heart_16230,Primed-enhancers_Heart_16231,Primed-enhancers_Heart_24511,Primed-enhancers_Heart_24521
GO:0035108	limb morphogenesis	1.87205	28	14.9569	0.0338	3.28846	21	6.38597	0.000131	Alx3,Bmp4,Bmp7,Cacna1c,Chd7,Col2a1,Cyp26b1,Dicer1,Fgfr1,Grem1,Lmx1b,Notch2,Pbx1,Pitx1,Rarb,Reck,Shh,Shox2,Tbx3,Tbx4,Tbx5	ENSFDAG00000000528,ENSFDAG00000000823,ENSFDAG00000002080,ENSFDAG00000002992,ENSFDAG00000003851,ENSFDAG00000005594,ENSFDAG00000006096,ENSFDAG00000006696,ENSFDAG00000009044,ENSFDAG00000009068,ENSFDAG00000009139,ENSFDAG00000011168,ENSFDAG00000011430,ENSFDAG00000012216,ENSFDAG00000012808,ENSFDAG00000013284,ENSFDAG00000014859,ENSFDAG00000018008,ENSFDAG00000019044,ENSFDAG00000019062,ENSFDAG00000021287	Primed-enhancers_Heart_12344,Primed-enhancers_Heart_14076,Primed-enhancers_Heart_15454,Primed-enhancers_Heart_16230,Primed-enhancers_Heart_16231,Primed-enhancers_Heart_19933,Primed-enhancers_Heart_29428,Primed-enhancers_Heart_31046,Primed-enhancers_Heart_3152,Primed-enhancers_Heart_32868,Primed-enhancers_Heart_33952,Primed-enhancers_Heart_34606,Primed-enhancers_Heart_34920,Primed-enhancers_Heart_…
GO:0030901	midbrain development	2.81691	11	3.90498	0.0345	5.72487	11	1.92144	0.000147	En2,Fgfr1,Fgfr2,Lmx1a,Lmx1b,Otx1,Otx2,Rfx4,Shh,Smad1,Wls	ENSFDAG00000002080,ENSFDAG00000006696,ENSFDAG00000007667,ENSFDAG00000008105,ENSFDAG00000009068,ENSFDAG00000011329,ENSFDAG00000012403,ENSFDAG00000013549,ENSFDAG00000014421,ENSFDAG00000018458,ENSFDAG00000020515	Primed-enhancers_Heart_16332,Primed-enhancers_Heart_29428,Primed-enhancers_Heart_3152,Primed-enhancers_Heart_35803,Primed-enhancers_Heart_39701,Primed-enhancers_Heart_39730,Primed-enhancers_Heart_48945,Primed-enhancers_Heart_49981,Primed-enhancers_Heart_50976,Primed-enhancers_Heart_5578,Primed-enhancers_Heart_6834
GO:0140352	export from cell	1.34338	100	74.4393	0.0356	1.48282	75	50.5791	0.00723	Acvr1c,Acvr2a,Adcy8,Apbb1,Arfgef2,Atp2b1,Axl,BC048507,C1qtnf3,Cacna1c,Cacna1h,Ccl12,Chd7,Cplx4,Crh,Cry1,Dgki,Dtnbp1,Exoc2,Exoc4,Exoc6b,Ffar4,Fgfr1,Foxo1,Frmd4a,Ghrhr,Ghsr,Gipr,Git1,Golph3,Gpr68,Grin2b,Grm2,Grp,Ildr1,Kcnq1,Lep,Lgi3,Lrp1,Mef2c,Mical3,Nr4a3,Nrg1,P2rx1,P2ry1,P2ry2,Pax8,Pde1c,Pdx1,Ppp3ca,Prkce,Ptprn2,Rab12,Rims1,Rims4,Runx1,Scrn1,Sergef,Sidt2,Sirt1,Slc16a10,Slc6a9,Smad4,Snx19,Sptbn2,S…	ENSFDAG00000000064,ENSFDAG00000000130,ENSFDAG00000000528,ENSFDAG00000000917,ENSFDAG00000001117,ENSFDAG00000001458,ENSFDAG00000001780,ENSFDAG00000001885,ENSFDAG00000002080,ENSFDAG00000003167,ENSFDAG00000003809,ENSFDAG00000005064,ENSFDAG00000005386,ENSFDAG00000005402,ENSFDAG00000007099,ENSFDAG00000007389,ENSFDAG00000008011,ENSFDAG00000008121,ENSFDAG00000008134,ENSFDAG00000008970,ENSFDAG00000009137,…	Primed-enhancers_Heart_12209,Primed-enhancers_Heart_12344,Primed-enhancers_Heart_12673,Primed-enhancers_Heart_13268,Primed-enhancers_Heart_135,Primed-enhancers_Heart_13617,Primed-enhancers_Heart_13639,Primed-enhancers_Heart_13653,Primed-enhancers_Heart_14423,Primed-enhancers_Heart_14427,Primed-enhancers_Heart_14431,Primed-enhancers_Heart_16931,Primed-enhancers_Heart_17137,Primed-enhancers_Heart_1…
GO:0010614	negative regulation of cardiac muscle hypertrophy	3.20756	9	2.80587	0.0356	3.66104	6	1.63888	0.0426	Foxo1,Foxp1,Jarid2,Smad3,Smad4,Trim63	ENSFDAG00000000295,ENSFDAG00000008134,ENSFDAG00000008754,ENSFDAG00000012354,ENSFDAG00000014357,ENSFDAG00000020383	Primed-enhancers_Heart_13617,Primed-enhancers_Heart_13639,Primed-enhancers_Heart_13653,Primed-enhancers_Heart_26365,Primed-enhancers_Heart_33684,Primed-enhancers_Heart_33702,Primed-enhancers_Heart_38410,Primed-enhancers_Heart_44876,Primed-enhancers_Heart_54101
GO:0110148	biomineralization	1.8173	30	16.508	0.0356	2.2521	21	9.32464	0.00812	Acvr1,Acvr2a,Ada,Ank,Atp2b1,Atraid,Bcor,Bmp4,Bmp7,Dicer1,Dspp,Fgfr1,Fgfr2,Grem1,Itgb6,Lep,Mef2c,Nectin1,Ptn,Smad3,Wls	ENSFDAG00000001117,ENSFDAG00000001780,ENSFDAG00000002080,ENSFDAG00000003009,ENSFDAG00000003851,ENSFDAG00000005565,ENSFDAG00000005574,ENSFDAG00000007195,ENSFDAG00000007714,ENSFDAG00000007937,ENSFDAG00000008970,ENSFDAG00000009044,ENSFDAG00000012403,ENSFDAG00000013284,ENSFDAG00000013790,ENSFDAG00000014357,ENSFDAG00000018458,ENSFDAG00000018798,ENSFDAG00000019082,ENSFDAG00000020851,ENSFDAG00000021287	Primed-enhancers_Heart_12344,Primed-enhancers_Heart_14423,Primed-enhancers_Heart_14427,Primed-enhancers_Heart_14431,Primed-enhancers_Heart_16230,Primed-enhancers_Heart_16231,Primed-enhancers_Heart_17969,Primed-enhancers_Heart_17975,Primed-enhancers_Heart_29731,Primed-enhancers_Heart_29870,Primed-enhancers_Heart_29882,Primed-enhancers_Heart_29883,Primed-enhancers_Heart_29896,Primed-enhancers_Heart…
GO:0048704	embryonic skeletal system morphogenesis	2.10755	20	9.48969	0.0373	3.02111	14	4.63407	0.00498	Alx3,Axin1,Bmp4,Bmp7,Col2a1,Fgfr2,Hoxc4,Hoxd3,Mef2c,Shox2,Six1,Six2,Smad3,Tgfbr2	ENSFDAG00000004569,ENSFDAG00000005005,ENSFDAG00000005594,ENSFDAG00000007144,ENSFDAG00000008970,ENSFDAG00000009044,ENSFDAG00000010330,ENSFDAG00000011158,ENSFDAG00000011168,ENSFDAG00000012384,ENSFDAG00000012808,ENSFDAG00000013284,ENSFDAG00000014357,ENSFDAG00000018458	Primed-enhancers_Heart_11338,Primed-enhancers_Heart_14423,Primed-enhancers_Heart_14427,Primed-enhancers_Heart_14431,Primed-enhancers_Heart_16230,Primed-enhancers_Heart_16231,Primed-enhancers_Heart_19933,Primed-enhancers_Heart_20204,Primed-enhancers_Heart_22833,Primed-enhancers_Heart_22834,Primed-enhancers_Heart_24511,Primed-enhancers_Heart_24521,Primed-enhancers_Heart_30366,Primed-enhancers_Heart…
GO:0031098	stress-activated protein kinase signaling cascade	1.67138	38	22.7356	0.0373	2.03894	28	13.7327	0.00647	Axin1,Bmp4,Ccdc88c,Dab2ip,Foxo1,Gadd45g,Hipk2,Hmgb1,Lep,Map3k1,Map3k4,Map3k5,Map3k7,Pdcd10,Phlpp1,Rapgef1,Ror2,Sash1,Sh3rf1,Sh3rf2,Sirpb1c,Smad3,Spag9,Tlr3,Tnfsf11,Trpv4,Usp25,Vegfa	ENSFDAG00000000501,ENSFDAG00000002571,ENSFDAG00000002748,ENSFDAG00000003960,ENSFDAG00000005242,ENSFDAG00000005600,ENSFDAG00000005950,ENSFDAG00000006711,ENSFDAG00000007144,ENSFDAG00000007378,ENSFDAG00000007962,ENSFDAG00000009044,ENSFDAG00000009317,ENSFDAG00000009437,ENSFDAG00000009617,ENSFDAG00000010074,ENSFDAG00000010109,ENSFDAG00000011556,ENSFDAG00000013121,ENSFDAG00000013461,ENSFDAG00000013494,…	Primed-enhancers_Heart_108,Primed-enhancers_Heart_12209,Primed-enhancers_Heart_13955,Primed-enhancers_Heart_13993,Primed-enhancers_Heart_15037,Primed-enhancers_Heart_16230,Primed-enhancers_Heart_16231,Primed-enhancers_Heart_17137,Primed-enhancers_Heart_1947,Primed-enhancers_Heart_21324,Primed-enhancers_Heart_21746,Primed-enhancers_Heart_21749,Primed-enhancers_Heart_22522,Primed-enhancers_Heart_22…
GO:0010594	regulation of endothelial cell migration	1.727	34	19.6873	0.0383	2.16273	22	10.1723	0.00965	Adamts9,Adgra2,Adgrb1,Akt3,Bmp4,Bmper,Dab2ip,Dicer1,Fgf1,Fgfr1,Foxp1,Hmgb1,Itgb3,Map2k5,Mef2c,Pdcd10,Ptprm,Robo4,Sash1,Shh,Sirt1,Vegfa	ENSFDAG00000002080,ENSFDAG00000002748,ENSFDAG00000004238,ENSFDAG00000005242,ENSFDAG00000005950,ENSFDAG00000006696,ENSFDAG00000008970,ENSFDAG00000009044,ENSFDAG00000009107,ENSFDAG00000009317,ENSFDAG00000009892,ENSFDAG00000010332,ENSFDAG00000011352,ENSFDAG00000011869,ENSFDAG00000012354,ENSFDAG00000016306,ENSFDAG00000017607,ENSFDAG00000017614,ENSFDAG00000018752,ENSFDAG00000021090,ENSFDAG00000021287,…	Primed-enhancers_Heart_108,Primed-enhancers_Heart_12344,Primed-enhancers_Heart_14423,Primed-enhancers_Heart_14427,Primed-enhancers_Heart_14431,Primed-enhancers_Heart_16230,Primed-enhancers_Heart_16231,Primed-enhancers_Heart_19072,Primed-enhancers_Heart_21324,Primed-enhancers_Heart_23513,Primed-enhancers_Heart_23935,Primed-enhancers_Heart_23967,Primed-enhancers_Heart_23984,Primed-enhancers_Heart_2…
GO:0032872	regulation of stress-activated MAPK cascade	1.7553	32	18.2305	0.0385	2.07646	23	11.0765	0.0113	Axin1,Bmp4,Dab2ip,Foxo1,Gadd45g,Hipk2,Hmgb1,Lep,Map3k1,Map3k4,Map3k5,Map3k7,Pdcd10,Phlpp1,Rapgef1,Sash1,Sh3rf1,Sh3rf2,Sirpb1c,Tlr3,Tnfsf11,Trpv4,Vegfa	ENSFDAG00000000501,ENSFDAG00000002571,ENSFDAG00000002748,ENSFDAG00000003960,ENSFDAG00000005242,ENSFDAG00000005600,ENSFDAG00000005950,ENSFDAG00000007144,ENSFDAG00000007378,ENSFDAG00000007962,ENSFDAG00000009044,ENSFDAG00000009317,ENSFDAG00000009437,ENSFDAG00000010074,ENSFDAG00000010109,ENSFDAG00000011556,ENSFDAG00000013461,ENSFDAG00000013790,ENSFDAG00000017614,ENSFDAG00000018113,ENSFDAG00000020383,…	Primed-enhancers_Heart_108,Primed-enhancers_Heart_13955,Primed-enhancers_Heart_15037,Primed-enhancers_Heart_16230,Primed-enhancers_Heart_16231,Primed-enhancers_Heart_17137,Primed-enhancers_Heart_1947,Primed-enhancers_Heart_21324,Primed-enhancers_Heart_22522,Primed-enhancers_Heart_22833,Primed-enhancers_Heart_22834,Primed-enhancers_Heart_23513,Primed-enhancers_Heart_25678,Primed-enhancers_Heart_29…
GO:0060681	branch elongation involved in ureteric bud branching	7.10763	4	0.562776	0.0385	10.617	3	0.282565	0.0211	Bmp4,Fgf1,Six1	ENSFDAG00000005005,ENSFDAG00000009044,ENSFDAG00000010332	Primed-enhancers_Heart_11338,Primed-enhancers_Heart_16230,Primed-enhancers_Heart_16231,Primed-enhancers_Heart_25595
GO:0007182	common-partner SMAD protein phosphorylation	4.39801	6	1.36425	0.0401	7.58359	3	0.395591	0.0437	Bmp4,Bmper,Tgfbr2	ENSFDAG00000009044,ENSFDAG00000012384,ENSFDAG00000016306	Primed-enhancers_Heart_16230,Primed-enhancers_Heart_16231,Primed-enhancers_Heart_35202,Primed-enhancers_Heart_35209,Primed-enhancers_Heart_35211,Primed-enhancers_Heart_55479
GO:0055007	cardiac muscle cell differentiation	2.33498	16	6.85232	0.0408	4.42376	14	3.16473	0.000174	Akap13,Bmp4,Dll1,Foxp1,Grem1,Mef2c,Nrg1,Rarb,Shox2,Smad4,T,Tbx3,Tbx5,Tsc1	ENSFDAG00000003851,ENSFDAG00000005594,ENSFDAG00000006096,ENSFDAG00000008134,ENSFDAG00000008970,ENSFDAG00000009044,ENSFDAG00000010065,ENSFDAG00000012216,ENSFDAG00000012354,ENSFDAG00000014165,ENSFDAG00000015163,ENSFDAG00000019062,ENSFDAG00000019749,ENSFDAG00000019969	Primed-enhancers_Heart_14423,Primed-enhancers_Heart_14427,Primed-enhancers_Heart_14431,Primed-enhancers_Heart_15454,Primed-enhancers_Heart_16230,Primed-enhancers_Heart_16231,Primed-enhancers_Heart_22425,Primed-enhancers_Heart_22618,Primed-enhancers_Heart_26365,Primed-enhancers_Heart_29180,Primed-enhancers_Heart_31046,Primed-enhancers_Heart_33952,Primed-enhancers_Heart_41725,Primed-enhancers_Heart…
GO:1903367	positive regulation of fear response	4.34797	6	1.37996	0.0418	7.07802	4	0.56513	0.0211	Crh,Grp,Mef2c,Prkar1b	ENSFDAG00000008970,ENSFDAG00000012394,ENSFDAG00000014506,ENSFDAG00000018370	Primed-enhancers_Heart_14423,Primed-enhancers_Heart_14427,Primed-enhancers_Heart_14431,Primed-enhancers_Heart_26219,Primed-enhancers_Heart_33235,Primed-enhancers_Heart_42309
GO:0042118	endothelial cell activation	4.34154	6	1.382	0.0419	7.07802	4	0.56513	0.0211	Bmper,Foxp1,Smad4,Socs5	ENSFDAG00000008134,ENSFDAG00000012354,ENSFDAG00000016306,ENSFDAG00000016496	Primed-enhancers_Heart_24624,Primed-enhancers_Heart_26365,Primed-enhancers_Heart_35202,Primed-enhancers_Heart_35209,Primed-enhancers_Heart_35211,Primed-enhancers_Heart_44876
GO:0060290	transdifferentiation	5.23165	5	0.955721	0.0421	7.58359	3	0.395591	0.0437	Mef2c,Smad3,Tbx5	ENSFDAG00000008970,ENSFDAG00000012216,ENSFDAG00000014357	Primed-enhancers_Heart_14423,Primed-enhancers_Heart_14427,Primed-enhancers_Heart_14431,Primed-enhancers_Heart_41725,Primed-enhancers_Heart_54101
GO:0042472	inner ear morphogenesis	2.0479	20	9.76609	0.0421	4.28971	16	3.72986	7.48e-05	Chd7,Col2a1,Dll1,Fgfr1,Fgfr2,Hmx2,Insig1,Kcnq1,Nr4a3,Otx1,Otx2,Pax8,Ror2,Six1,Tbx3,Ush1g	ENSFDAG00000000528,ENSFDAG00000002080,ENSFDAG00000005005,ENSFDAG00000006202,ENSFDAG00000007667,ENSFDAG00000010623,ENSFDAG00000011168,ENSFDAG00000011238,ENSFDAG00000012195,ENSFDAG00000013494,ENSFDAG00000013549,ENSFDAG00000014165,ENSFDAG00000014814,ENSFDAG00000018458,ENSFDAG00000019062,ENSFDAG00000020989	Primed-enhancers_Heart_11338,Primed-enhancers_Heart_13993,Primed-enhancers_Heart_16332,Primed-enhancers_Heart_19933,Primed-enhancers_Heart_22618,Primed-enhancers_Heart_28978,Primed-enhancers_Heart_28988,Primed-enhancers_Heart_35887,Primed-enhancers_Heart_35890,Primed-enhancers_Heart_35891,Primed-enhancers_Heart_35892,Primed-enhancers_Heart_36455,Primed-enhancers_Heart_39701,Primed-enhancers_Heart…
GO:0031648	protein destabilization	2.70815	11	4.06181	0.0423	3.46962	10	2.88216	0.00922	Ccdc88c,Crebbp,Derl1,Ep300,Fbxl3,Mylip,Rnf139,Sirt1,Src,Xbp1	ENSFDAG00000009617,ENSFDAG00000009892,ENSFDAG00000012722,ENSFDAG00000013567,ENSFDAG00000014534,ENSFDAG00000014827,ENSFDAG00000015033,ENSFDAG00000015133,ENSFDAG00000015207,ENSFDAG00000020325	Primed-enhancers_Heart_12209,Primed-enhancers_Heart_13678,Primed-enhancers_Heart_17304,Primed-enhancers_Heart_18589,Primed-enhancers_Heart_18607,Primed-enhancers_Heart_18636,Primed-enhancers_Heart_19445,Primed-enhancers_Heart_20271,Primed-enhancers_Heart_32328,Primed-enhancers_Heart_5067,Primed-enhancers_Heart_6573
GO:0060394	negative regulation of pathway-restricted SMAD protein phosphorylation	5.19245	5	0.962936	0.0423	7.07802	4	0.56513	0.0211	Grem1,Lrp1,Smad7,Xbp1	ENSFDAG00000003851,ENSFDAG00000012722,ENSFDAG00000017680,ENSFDAG00000017848	Primed-enhancers_Heart_26415,Primed-enhancers_Heart_26427,Primed-enhancers_Heart_31046,Primed-enhancers_Heart_6339,Primed-enhancers_Heart_6573
GO:0030224	monocyte differentiation	2.8606	10	3.49576	0.0431	4.42376	7	1.58236	0.0117	Bmp4,Foxp1,Gpr68,Mef2c,Myc,Vegfa,Zbtb46	ENSFDAG00000002748,ENSFDAG00000004839,ENSFDAG00000005626,ENSFDAG00000008970,ENSFDAG00000009044,ENSFDAG00000012354,ENSFDAG00000019931	Primed-enhancers_Heart_12209,Primed-enhancers_Heart_14423,Primed-enhancers_Heart_14427,Primed-enhancers_Heart_14431,Primed-enhancers_Heart_16230,Primed-enhancers_Heart_16231,Primed-enhancers_Heart_18736,Primed-enhancers_Heart_23513,Primed-enhancers_Heart_33085,Primed-enhancers_Heart_44876
GO:0022409	positive regulation of cell-cell adhesion	1.63379	39	23.8709	0.0434	1.80825	28	15.4846	0.0221	Ada,Ambra1,Ap3b1,Arid1b,Bmp7,Cd40lg,Cyrib,Gp1ba,Hmgb1,Kitl,Lep,Magi1,Mex3b,Myo10,Nck1,Nr4a3,Ppp3ca,Rela,Runx1,Shh,Sirpb1c,Smad7,Socs5,Tgfbr2,Thy1,Tnfsf11,Xbp1,Zmiz1	ENSFDAG00000005600,ENSFDAG00000006696,ENSFDAG00000009317,ENSFDAG00000009672,ENSFDAG00000010109,ENSFDAG00000010798,ENSFDAG00000011718,ENSFDAG00000011816,ENSFDAG00000012280,ENSFDAG00000012384,ENSFDAG00000012722,ENSFDAG00000013284,ENSFDAG00000013790,ENSFDAG00000014492,ENSFDAG00000014814,ENSFDAG00000015145,ENSFDAG00000015740,ENSFDAG00000015972,ENSFDAG00000016290,ENSFDAG00000016496,ENSFDAG00000016677,…	Primed-enhancers_Heart_108,Primed-enhancers_Heart_14609,Primed-enhancers_Heart_14614,Primed-enhancers_Heart_15810,Primed-enhancers_Heart_17137,Primed-enhancers_Heart_17894,Primed-enhancers_Heart_18790,Primed-enhancers_Heart_21978,Primed-enhancers_Heart_22291,Primed-enhancers_Heart_24624,Primed-enhancers_Heart_26415,Primed-enhancers_Heart_26427,Primed-enhancers_Heart_26975,Primed-enhancers_Heart_3…
GO:0030278	regulation of ossification	1.83474	27	14.716	0.0434	2.61074	18	6.89459	0.00464	Acvr1,Acvr2a,Ank,Atp2b1,Atraid,Bcor,Bmp4,Bmp7,Grem1,Kremen1,Mef2c,P2ry2,Pbx1,Ptn,Six2,Smad3,Smad7,Smurf1	ENSFDAG00000001117,ENSFDAG00000001780,ENSFDAG00000003009,ENSFDAG00000003851,ENSFDAG00000004569,ENSFDAG00000005565,ENSFDAG00000007195,ENSFDAG00000007937,ENSFDAG00000008970,ENSFDAG00000009044,ENSFDAG00000009051,ENSFDAG00000010213,ENSFDAG00000013284,ENSFDAG00000014357,ENSFDAG00000017680,ENSFDAG00000018008,ENSFDAG00000019082,ENSFDAG00000019199	Primed-enhancers_Heart_14423,Primed-enhancers_Heart_14427,Primed-enhancers_Heart_14431,Primed-enhancers_Heart_16230,Primed-enhancers_Heart_16231,Primed-enhancers_Heart_17969,Primed-enhancers_Heart_17975,Primed-enhancers_Heart_24511,Primed-enhancers_Heart_24521,Primed-enhancers_Heart_26415,Primed-enhancers_Heart_26427,Primed-enhancers_Heart_29731,Primed-enhancers_Heart_29870,Primed-enhancers_Heart…
GO:0031214	biomineral tissue development	1.79678	29	16.14	0.0438	2.25415	20	8.87254	0.0098	Acvr1,Acvr2a,Ank,Atp2b1,Atraid,Bcor,Bmp4,Bmp7,Dicer1,Dspp,Fgfr1,Fgfr2,Grem1,Itgb6,Lep,Mef2c,Nectin1,Ptn,Smad3,Wls	ENSFDAG00000001117,ENSFDAG00000001780,ENSFDAG00000002080,ENSFDAG00000003009,ENSFDAG00000003851,ENSFDAG00000005565,ENSFDAG00000005574,ENSFDAG00000007195,ENSFDAG00000007714,ENSFDAG00000007937,ENSFDAG00000008970,ENSFDAG00000009044,ENSFDAG00000012403,ENSFDAG00000013284,ENSFDAG00000013790,ENSFDAG00000014357,ENSFDAG00000018458,ENSFDAG00000019082,ENSFDAG00000020851,ENSFDAG00000021287	Primed-enhancers_Heart_12344,Primed-enhancers_Heart_14423,Primed-enhancers_Heart_14427,Primed-enhancers_Heart_14431,Primed-enhancers_Heart_16230,Primed-enhancers_Heart_16231,Primed-enhancers_Heart_17969,Primed-enhancers_Heart_17975,Primed-enhancers_Heart_29731,Primed-enhancers_Heart_29870,Primed-enhancers_Heart_29882,Primed-enhancers_Heart_29883,Primed-enhancers_Heart_29896,Primed-enhancers_Heart…
GO:0072038	mesenchymal stem cell maintenance involved in nephron morphogenesis	5.03955	5	0.992152	0.0457	7.58359	3	0.395591	0.0437	Bmp7,Pax8,Six2	ENSFDAG00000004569,ENSFDAG00000011238,ENSFDAG00000013284	Primed-enhancers_Heart_24511,Primed-enhancers_Heart_24521,Primed-enhancers_Heart_28978,Primed-enhancers_Heart_28988,Primed-enhancers_Heart_32868
GO:0001763	morphogenesis of a branching structure	1.59697	42	26.2998	0.0462	2.46908	30	12.1503	0.000304	Acvr1,B4galt1,Bmp4,Bmp7,Dicer1,Dspp,Esr1,Ext1,Fgfr1,Fgfr2,Flt1,Gli2,Grem1,Hhip,Lama1,Myc,Ntn4,Pax8,Pbx1,Pdgfa,Pkd1,Shh,Shox2,Six1,Six2,Smad4,Src,Tbx3,Tgfbr2,Vegfa	ENSFDAG00000002080,ENSFDAG00000002748,ENSFDAG00000003851,ENSFDAG00000004569,ENSFDAG00000004839,ENSFDAG00000005005,ENSFDAG00000005594,ENSFDAG00000006696,ENSFDAG00000007195,ENSFDAG00000008134,ENSFDAG00000008165,ENSFDAG00000009044,ENSFDAG00000009080,ENSFDAG00000010853,ENSFDAG00000011238,ENSFDAG00000012384,ENSFDAG00000012545,ENSFDAG00000012650,ENSFDAG00000013185,ENSFDAG00000013284,ENSFDAG00000014474,…	Primed-enhancers_Heart_11338,Primed-enhancers_Heart_12344,Primed-enhancers_Heart_16230,Primed-enhancers_Heart_16231,Primed-enhancers_Heart_18461,Primed-enhancers_Heart_18491,Primed-enhancers_Heart_18506,Primed-enhancers_Heart_18509,Primed-enhancers_Heart_18511,Primed-enhancers_Heart_18517,Primed-enhancers_Heart_18520,Primed-enhancers_Heart_18736,Primed-enhancers_Heart_1998,Primed-enhancers_Heart_…
GO:0046903	secretion	1.31863	104	78.8695	0.0473	1.43176	78	54.4785	0.0118	Acvr1c,Acvr2a,Ada,Adcy8,Apbb1,Arfgef2,Axl,BC048507,C1qtnf3,Cacna1c,Cacna1h,Ccl12,Chd7,Cplx4,Crh,Cry1,Dgki,Dtnbp1,Exoc2,Exoc4,Exoc6b,Ffar4,Fgfr1,Foxo1,Frmd4a,Ghrhr,Ghsr,Gipr,Git1,Golph3,Gpr68,Grin2b,Grm2,Grp,Guca2b,Ildr1,Kcnq1,Lep,Lgi3,Lrp1,Mef2c,Mical3,Myc,Nr4a3,Nrg1,P2rx1,P2ry1,P2ry2,Pax8,Pde1c,Pdx1,Ppp3ca,Prkce,Ptprn2,Rab12,Rims1,Rims4,Runx1,Scrn1,Sergef,Sidt2,Sirt1,Slc16a10,Slc6a9,Smad4,Snx19,…	ENSFDAG00000000064,ENSFDAG00000000130,ENSFDAG00000000528,ENSFDAG00000000917,ENSFDAG00000001117,ENSFDAG00000001346,ENSFDAG00000001458,ENSFDAG00000001885,ENSFDAG00000002080,ENSFDAG00000002748,ENSFDAG00000003167,ENSFDAG00000003809,ENSFDAG00000004839,ENSFDAG00000005064,ENSFDAG00000005386,ENSFDAG00000005402,ENSFDAG00000007099,ENSFDAG00000007389,ENSFDAG00000008011,ENSFDAG00000008121,ENSFDAG00000008134,…	Primed-enhancers_Heart_12209,Primed-enhancers_Heart_12344,Primed-enhancers_Heart_12673,Primed-enhancers_Heart_13268,Primed-enhancers_Heart_135,Primed-enhancers_Heart_13617,Primed-enhancers_Heart_13639,Primed-enhancers_Heart_13653,Primed-enhancers_Heart_14423,Primed-enhancers_Heart_14427,Primed-enhancers_Heart_14431,Primed-enhancers_Heart_16931,Primed-enhancers_Heart_17137,Primed-enhancers_Heart_1…
GO:0007252	I-kappaB phosphorylation	3.25671	8	2.45647	0.0477	4.0216	5	1.24329	0.05	Dab2ip,Map3k7,Sirpb1c,Tlr3,Usp25	ENSFDAG00000002571,ENSFDAG00000005600,ENSFDAG00000009437,ENSFDAG00000013121,ENSFDAG00000017614	Primed-enhancers_Heart_21746,Primed-enhancers_Heart_21749,Primed-enhancers_Heart_29564,Primed-enhancers_Heart_31415,Primed-enhancers_Heart_31428,Primed-enhancers_Heart_36118,Primed-enhancers_Heart_50289,Primed-enhancers_Heart_50291
GO:0030500	regulation of bone mineralization	2.06698	19	9.19217	0.0478	2.83121	12	4.23847	0.0142	Acvr1,Acvr2a,Ank,Atp2b1,Atraid,Bcor,Bmp4,Bmp7,Grem1,Mef2c,Ptn,Smad3	ENSFDAG00000001117,ENSFDAG00000001780,ENSFDAG00000003009,ENSFDAG00000003851,ENSFDAG00000005565,ENSFDAG00000007195,ENSFDAG00000007937,ENSFDAG00000008970,ENSFDAG00000009044,ENSFDAG00000013284,ENSFDAG00000014357,ENSFDAG00000019082	Primed-enhancers_Heart_14423,Primed-enhancers_Heart_14427,Primed-enhancers_Heart_14431,Primed-enhancers_Heart_16230,Primed-enhancers_Heart_16231,Primed-enhancers_Heart_17969,Primed-enhancers_Heart_17975,Primed-enhancers_Heart_29731,Primed-enhancers_Heart_29870,Primed-enhancers_Heart_29882,Primed-enhancers_Heart_29883,Primed-enhancers_Heart_29896,Primed-enhancers_Heart_31046,Primed-enhancers_Heart…
GO:0060688	regulation of morphogenesis of a branching structure	2.11766	17	8.02774	0.0491	3.99566	14	3.50381	0.000459	Bmp4,Bmp7,Esr1,Fgfr1,Fgfr2,Grem1,Ntn4,Pax8,Pdgfa,Shh,Shox2,Six1,Six2,Vegfa	ENSFDAG00000002080,ENSFDAG00000002748,ENSFDAG00000003851,ENSFDAG00000004569,ENSFDAG00000005005,ENSFDAG00000005594,ENSFDAG00000006696,ENSFDAG00000009044,ENSFDAG00000009080,ENSFDAG00000011238,ENSFDAG00000013284,ENSFDAG00000014474,ENSFDAG00000018458,ENSFDAG00000019132	Primed-enhancers_Heart_11338,Primed-enhancers_Heart_16230,Primed-enhancers_Heart_16231,Primed-enhancers_Heart_23513,Primed-enhancers_Heart_24511,Primed-enhancers_Heart_24521,Primed-enhancers_Heart_28978,Primed-enhancers_Heart_28988,Primed-enhancers_Heart_31046,Primed-enhancers_Heart_32868,Primed-enhancers_Heart_33952,Primed-enhancers_Heart_3946,Primed-enhancers_Heart_39730,Primed-enhancers_Heart_…
GO:1900744	regulation of p38MAPK cascade	2.61987	11	4.19869	0.0491	3.45269	8	2.31703	0.0226	Bmp4,Dab2ip,Gadd45g,Lep,Map3k4,Phlpp1,Sash1,Vegfa	ENSFDAG00000002748,ENSFDAG00000005242,ENSFDAG00000007378,ENSFDAG00000009044,ENSFDAG00000011556,ENSFDAG00000013790,ENSFDAG00000017614,ENSFDAG00000021114	Primed-enhancers_Heart_13955,Primed-enhancers_Heart_16230,Primed-enhancers_Heart_16231,Primed-enhancers_Heart_1947,Primed-enhancers_Heart_22522,Primed-enhancers_Heart_23513,Primed-enhancers_Heart_29564,Primed-enhancers_Heart_4050,Primed-enhancers_Heart_4070,Primed-enhancers_Heart_43074,Primed-enhancers_Heart_43087
GO:1903050	regulation of proteolysis involved in cellular protein catabolic process	1.74976	29	16.5737	0.0491	2.01998	25	12.3763	0.0107	Anks1,Axin1,Ccar2,Dab2ip,Disc1,Hipk2,Pias1,Pkd1,Prickle1,Pten,Rbx1,Rnf139,Rnf40,Rybp,Senp1,Sh3rf1,Sh3rf2,Shh,Smad7,Smurf1,Socs5,Tmtc3,Usp19,Usp25,Xbp1	ENSFDAG00000000501,ENSFDAG00000000589,ENSFDAG00000004696,ENSFDAG00000005687,ENSFDAG00000005967,ENSFDAG00000006696,ENSFDAG00000007144,ENSFDAG00000007962,ENSFDAG00000008825,ENSFDAG00000009969,ENSFDAG00000010213,ENSFDAG00000011032,ENSFDAG00000012183,ENSFDAG00000012722,ENSFDAG00000013121,ENSFDAG00000015059,ENSFDAG00000016496,ENSFDAG00000017209,ENSFDAG00000017614,ENSFDAG00000017680,ENSFDAG00000018888,…	Primed-enhancers_Heart_16910,Primed-enhancers_Heart_18636,Primed-enhancers_Heart_19445,Primed-enhancers_Heart_19809,Primed-enhancers_Heart_19933,Primed-enhancers_Heart_21746,Primed-enhancers_Heart_21749,Primed-enhancers_Heart_22737,Primed-enhancers_Heart_22833,Primed-enhancers_Heart_22834,Primed-enhancers_Heart_22925,Primed-enhancers_Heart_24624,Primed-enhancers_Heart_25678,Primed-enhancers_Heart…

## Sheet: Liver P. Enhancers gains nmrdmr
GO	Name	Binom Enrichment	# foreground regions	# expected regions	Binom BH p-value	Hyper Enrichment	# foreground genes	# expected genes	Hyper BH p-value	Genes	Gene_IDS	Regions
GO:0061036	positive regulation of cartilage development	3.67377	41	11.1602	1.06e-08	3.71229	12	3.2325	0.00126	Bmp2,Bmp4,Gli3,Smad1,Smad3,Smad7,Sox5,Sox6,Sox9,Thrb,Wnt5a,Zbtb16	ENSFDAG00000005890,ENSFDAG00000008006,ENSFDAG00000009044,ENSFDAG00000011655,ENSFDAG00000012886,ENSFDAG00000014357,ENSFDAG00000014421,ENSFDAG00000014810,ENSFDAG00000016628,ENSFDAG00000017680,ENSFDAG00000018863,ENSFDAG00000021387	Primed-enhancers_Liver_13448,Primed-enhancers_Liver_13470,Primed-enhancers_Liver_17758,Primed-enhancers_Liver_17763,Primed-enhancers_Liver_21312,Primed-enhancers_Liver_21317,Primed-enhancers_Liver_21346,Primed-enhancers_Liver_21350,Primed-enhancers_Liver_21381,Primed-enhancers_Liver_21386,Primed-enhancers_Liver_21917,Primed-enhancers_Liver_22351,Primed-enhancers_Liver_22352,Primed-enhancers_Liver…
GO:0061035	regulation of cartilage development	2.62488	60	22.8582	9.14e-08	2.97353	23	7.73492	9.51e-05	Bmp2,Bmp4,Ctnnb1,Gli2,Gli3,Lep,Lnpk,Maf,Mkx,Rarb,Six2,Smad1,Smad3,Smad7,Sox5,Sox6,Sox9,Tgfb1,Tgfb2,Thrb,Trps1,Wnt5a,Zbtb16	ENSFDAG00000004569,ENSFDAG00000005890,ENSFDAG00000006096,ENSFDAG00000008006,ENSFDAG00000008083,ENSFDAG00000009044,ENSFDAG00000009384,ENSFDAG00000010014,ENSFDAG00000011655,ENSFDAG00000012104,ENSFDAG00000012415,ENSFDAG00000012435,ENSFDAG00000012545,ENSFDAG00000012886,ENSFDAG00000013790,ENSFDAG00000014357,ENSFDAG00000014421,ENSFDAG00000014810,ENSFDAG00000015084,ENSFDAG00000016628,ENSFDAG00000017680,…	Primed-enhancers_Liver_13448,Primed-enhancers_Liver_13470,Primed-enhancers_Liver_17758,Primed-enhancers_Liver_17763,Primed-enhancers_Liver_21294,Primed-enhancers_Liver_21297,Primed-enhancers_Liver_21300,Primed-enhancers_Liver_21304,Primed-enhancers_Liver_21312,Primed-enhancers_Liver_21317,Primed-enhancers_Liver_21346,Primed-enhancers_Liver_21350,Primed-enhancers_Liver_21381,Primed-enhancers_Liver…
GO:0032874	positive regulation of stress-activated MAPK cascade	2.38436	68	28.5192	2.17e-07	2.31428	35	15.1235	0.000114	App,Bmp2,Bmp4,Ccl19,Dab2,Dab2ip,Hand2,Hipk2,Hmgb1,Hmgcr,Lep,Map3k1,Map3k5,Map3k7,Map4k2,Mfhas1,Mid1,Nod1,Oprk1,Pja2,Plcb1,Rell1,Ripk2,Sash1,Serpinf2,Sh3rf1,Stk3,Taok3,Tgfb2,Tlr3,Tnfsf11,Vegfa,Wnt16,Wnt5a,Zfp622	ENSFDAG00000000501,ENSFDAG00000002571,ENSFDAG00000002748,ENSFDAG00000003960,ENSFDAG00000005242,ENSFDAG00000005504,ENSFDAG00000005890,ENSFDAG00000006229,ENSFDAG00000008260,ENSFDAG00000008823,ENSFDAG00000009044,ENSFDAG00000009317,ENSFDAG00000009437,ENSFDAG00000009453,ENSFDAG00000009708,ENSFDAG00000010109,ENSFDAG00000010372,ENSFDAG00000011300,ENSFDAG00000011655,ENSFDAG00000011699,ENSFDAG00000012435,…	Primed-enhancers_Liver_11446,Primed-enhancers_Liver_190,Primed-enhancers_Liver_199,Primed-enhancers_Liver_20094,Primed-enhancers_Liver_20737,Primed-enhancers_Liver_218,Primed-enhancers_Liver_21917,Primed-enhancers_Liver_22351,Primed-enhancers_Liver_22352,Primed-enhancers_Liver_23645,Primed-enhancers_Liver_23646,Primed-enhancers_Liver_24601,Primed-enhancers_Liver_24995,Primed-enhancers_Liver_25243…
GO:0060510	type II pneumocyte differentiation	7.09723	17	2.3953	8.43e-07	5.77468	4	0.69268	0.0295	Fgf10,Fndc3b,Igf1,Nfib	ENSFDAG00000010527,ENSFDAG00000012167,ENSFDAG00000017616,ENSFDAG00000017805	Primed-enhancers_Liver_20961,Primed-enhancers_Liver_20962,Primed-enhancers_Liver_20965,Primed-enhancers_Liver_20966,Primed-enhancers_Liver_20967,Primed-enhancers_Liver_45793,Primed-enhancers_Liver_45803,Primed-enhancers_Liver_45814,Primed-enhancers_Liver_45831,Primed-enhancers_Liver_45839,Primed-enhancers_Liver_45856,Primed-enhancers_Liver_45859,Primed-enhancers_Liver_51521,Primed-enhancers_Liver…
GO:0071559	response to transforming growth factor beta	1.99976	88	44.0052	1.82e-06	2.12838	43	20.2032	0.000105	Actr3,Apaf1,Bmp2,Cdkn2b,Crebbp,Dab2,Dlx1,Fermt1,Got1,Hipk2,Igf1r,Itga3,Lats1,Npnt,Nrep,Onecut1,Onecut2,Pparg,Ppargc1a,Ppm1a,Ptk2,Rasl11b,Rock1,Rock2,Runx1,Sap30,Sin3a,Smad2,Smad3,Smad7,Sox5,Sox6,Sox9,Spry2,Strap,Suds3,Tgfb1,Tgfb3,Wfikkn2,Wwox,Yes1,Zfhx3,Zfp36l1	ENSFDAG00000000501,ENSFDAG00000000810,ENSFDAG00000002894,ENSFDAG00000003278,ENSFDAG00000004743,ENSFDAG00000004755,ENSFDAG00000005659,ENSFDAG00000006381,ENSFDAG00000007952,ENSFDAG00000008083,ENSFDAG00000008711,ENSFDAG00000010167,ENSFDAG00000010372,ENSFDAG00000010876,ENSFDAG00000010997,ENSFDAG00000011655,ENSFDAG00000011692,ENSFDAG00000012059,ENSFDAG00000012253,ENSFDAG00000012280,ENSFDAG00000012484,…	Primed-enhancers_Liver_12365,Primed-enhancers_Liver_12381,Primed-enhancers_Liver_12439,Primed-enhancers_Liver_12443,Primed-enhancers_Liver_13448,Primed-enhancers_Liver_13470,Primed-enhancers_Liver_14369,Primed-enhancers_Liver_15680,Primed-enhancers_Liver_16024,Primed-enhancers_Liver_16027,Primed-enhancers_Liver_16028,Primed-enhancers_Liver_16029,Primed-enhancers_Liver_16036,Primed-enhancers_Liver…
GO:0032332	positive regulation of chondrocyte differentiation	3.61158	31	8.58349	1.82e-06	3.64716	8	2.19349	0.0141	Gli3,Smad3,Smad7,Sox5,Sox6,Sox9,Thrb,Zbtb16	ENSFDAG00000008006,ENSFDAG00000012886,ENSFDAG00000014357,ENSFDAG00000014810,ENSFDAG00000016628,ENSFDAG00000017680,ENSFDAG00000018863,ENSFDAG00000021387	Primed-enhancers_Liver_13448,Primed-enhancers_Liver_13470,Primed-enhancers_Liver_17758,Primed-enhancers_Liver_17763,Primed-enhancers_Liver_21312,Primed-enhancers_Liver_21317,Primed-enhancers_Liver_21346,Primed-enhancers_Liver_21350,Primed-enhancers_Liver_21381,Primed-enhancers_Liver_21386,Primed-enhancers_Liver_36159,Primed-enhancers_Liver_36179,Primed-enhancers_Liver_36189,Primed-enhancers_Liver…
GO:0009888	tissue development	1.42408	262	183.978	3.49e-06	1.78086	147	82.5443	1.57e-09	Acvr1,Acvr2a,Adamts9,Ahr,Angpt1,Ank,Ano6,Ap3b1,Asxl1,Asxl2,Atp2c1,Atrn,Bcor,Bmp2,Bmp2k,Bmp4,Cdon,Cftr,Chd7,Chrd,Col1a1,Creb5,Ctnnb1,Dab2,Dact1,Dicer1,Dlg1,Dlk1,Dll1,Egflam,Eif2ak3,Elf5,Enam,Fam20c,Fbxw8,Fgf10,Fgf3,Fgfr1,Fgfr2,Foxp1,Fto,Fzd9,Gab1,Gata4,Ghsr,Gja6,Gli2,Gli3,Gpc3,Greb1l,Hand2,Hdac7,Hdac9,Hmgcr,Igf1,Igf1r,Inka1,Itgb6,Jak2,Jph2,Klf4,Klf7,Lamb1,Lep,Lhx2,Lmod3,Lrp5,Mbnl1,Meox2,Mettl8,Mkx…	ENSFDAG00000000528,ENSFDAG00000000548,ENSFDAG00000001117,ENSFDAG00000001188,ENSFDAG00000001288,ENSFDAG00000001331,ENSFDAG00000001467,ENSFDAG00000001807,ENSFDAG00000002076,ENSFDAG00000002080,ENSFDAG00000002280,ENSFDAG00000002748,ENSFDAG00000002894,ENSFDAG00000003009,ENSFDAG00000003226,ENSFDAG00000003992,ENSFDAG00000004129,ENSFDAG00000004447,ENSFDAG00000004696,ENSFDAG00000004743,ENSFDAG00000005565,…	Primed-enhancers_Liver_10472,Primed-enhancers_Liver_11051,Primed-enhancers_Liver_11069,Primed-enhancers_Liver_11083,Primed-enhancers_Liver_12421,Primed-enhancers_Liver_12958,Primed-enhancers_Liver_1304,Primed-enhancers_Liver_1305,Primed-enhancers_Liver_1307,Primed-enhancers_Liver_13448,Primed-enhancers_Liver_13470,Primed-enhancers_Liver_1354,Primed-enhancers_Liver_13710,Primed-enhancers_Liver_137…
GO:0007178	transmembrane receptor protein serine/threonine kinase signaling pathway	1.6857	133	78.8989	4.72e-06	1.94506	75	38.5592	3.09e-06	Acvr1,Acvr1c,Acvr2a,Bmp2,Bmp3,Bmp4,Cdkn2b,Chrd,Crb2,Crebbp,Crim1,Ctdspl2,Dab2,Dact2,Dcp1a,Dlx1,Dlx3,Dlx5,Fam83g,Fermt1,Fgf10,Gata4,Gdf10,Got1,Gpc3,Hipk2,Inhba,Inhbb,Itga3,Itgb6,Itgb8,Jak2,Lats1,Magi2,Map3k1,Map3k7,Nlk,Npnt,Nrep,Onecut1,Onecut2,Pakap,Pakap,Pelo,Pml,Pparg,Ppm1a,Ppm1l,Ptk2,Ptprk,Rasl11b,Rnf165,Sap30,Sin3a,Skor1,Skor2,Smad1,Smad2,Smad3,Smad7,Sorl1,Spry2,Strap,Suds3,Tgfb1,Tgfb2,Tgfb3,…	ENSFDAG00000000057,ENSFDAG00000000501,ENSFDAG00000000530,ENSFDAG00000000810,ENSFDAG00000001117,ENSFDAG00000002076,ENSFDAG00000002571,ENSFDAG00000002894,ENSFDAG00000003104,ENSFDAG00000003167,ENSFDAG00000003278,ENSFDAG00000003824,ENSFDAG00000004399,ENSFDAG00000004474,ENSFDAG00000004743,ENSFDAG00000005173,ENSFDAG00000005588,ENSFDAG00000005671,ENSFDAG00000005890,ENSFDAG00000006304,ENSFDAG00000007193,…	Primed-enhancers_Liver_10908,Primed-enhancers_Liver_11704,Primed-enhancers_Liver_12365,Primed-enhancers_Liver_12381,Primed-enhancers_Liver_12439,Primed-enhancers_Liver_12443,Primed-enhancers_Liver_13667,Primed-enhancers_Liver_1564,Primed-enhancers_Liver_15680,Primed-enhancers_Liver_16500,Primed-enhancers_Liver_17492,Primed-enhancers_Liver_17763,Primed-enhancers_Liver_17781,Primed-enhancers_Liver_…
GO:0048534	hematopoietic or lymphoid organ development	1.54259	174	112.797	9.91e-06	1.4706	91	61.8794	0.0031	Acvr2a,Adar,Ahr,Angpt1,Ap3b1,Arid1a,Arid1b,Arid2,Asxl1,Asxl2,Atp11c,Bcl2l11,Bmp4,Braf,Ccl19,Ccr7,Cd44,Cdkn2b,Crip2,Csf3,Ctnnb1,Cyp26b1,Dicer1,Dlk1,Dll1,Drosha,Epas1,Ephb3,Ercc1,Ets1,Fgf10,Fgf3,Foxp1,Fshr,Gabpa,Gli3,Gpr68,Hand2,Hmgb1,Hspa9,Ifng,Inhba,Itpkb,Jak1,Jak2,Jarid2,Kat6a,Klf4,Lep,Lmo4,Lrp5,Lyl1,Meis1,Myc,Nfkb2,Nkx2-3,Onecut1,Pik3r1,Ppargc1b,Ppp3ca,Psen1,Ptn,Rbfox2,Ripk2,Rorc,Runx1,Sh3rf1,S…	ENSFDAG00000000295,ENSFDAG00000000334,ENSFDAG00000001117,ENSFDAG00000001188,ENSFDAG00000001807,ENSFDAG00000004662,ENSFDAG00000004839,ENSFDAG00000005217,ENSFDAG00000005504,ENSFDAG00000005565,ENSFDAG00000005632,ENSFDAG00000005741,ENSFDAG00000005748,ENSFDAG00000006204,ENSFDAG00000006438,ENSFDAG00000006826,ENSFDAG00000007522,ENSFDAG00000008006,ENSFDAG00000008083,ENSFDAG00000008095,ENSFDAG00000008332,…	Primed-enhancers_Liver_12720,Primed-enhancers_Liver_12754,Primed-enhancers_Liver_13710,Primed-enhancers_Liver_13720,Primed-enhancers_Liver_13721,Primed-enhancers_Liver_14034,Primed-enhancers_Liver_14771,Primed-enhancers_Liver_15900,Primed-enhancers_Liver_15903,Primed-enhancers_Liver_16024,Primed-enhancers_Liver_16027,Primed-enhancers_Liver_16028,Primed-enhancers_Liver_16029,Primed-enhancers_Liver…
GO:0071560	cellular response to transforming growth factor beta stimulus	1.94085	82	42.2496	1.23e-05	2.0262	40	19.7414	0.000509	Actr3,Apaf1,Bmp2,Cdkn2b,Crebbp,Dab2,Dlx1,Fermt1,Got1,Hipk2,Igf1r,Itga3,Lats1,Npnt,Nrep,Onecut1,Onecut2,Pparg,Ppargc1a,Ppm1a,Ptk2,Rasl11b,Runx1,Sap30,Sin3a,Smad2,Smad3,Smad7,Sox5,Sox6,Sox9,Spry2,Strap,Suds3,Tgfb1,Tgfb3,Wfikkn2,Wwox,Yes1,Zfp36l1	ENSFDAG00000000501,ENSFDAG00000000810,ENSFDAG00000002894,ENSFDAG00000003278,ENSFDAG00000004743,ENSFDAG00000004755,ENSFDAG00000005659,ENSFDAG00000006381,ENSFDAG00000007952,ENSFDAG00000008083,ENSFDAG00000008711,ENSFDAG00000010167,ENSFDAG00000010372,ENSFDAG00000010876,ENSFDAG00000010997,ENSFDAG00000011655,ENSFDAG00000011692,ENSFDAG00000012059,ENSFDAG00000012253,ENSFDAG00000012280,ENSFDAG00000012886,…	Primed-enhancers_Liver_12365,Primed-enhancers_Liver_12381,Primed-enhancers_Liver_12439,Primed-enhancers_Liver_12443,Primed-enhancers_Liver_13448,Primed-enhancers_Liver_13470,Primed-enhancers_Liver_15680,Primed-enhancers_Liver_16024,Primed-enhancers_Liver_16027,Primed-enhancers_Liver_16028,Primed-enhancers_Liver_16029,Primed-enhancers_Liver_16036,Primed-enhancers_Liver_16500,Primed-enhancers_Liver…
GO:0051056	regulation of small GTPase mediated signal transduction	1.81092	95	52.4596	2.25e-05	2.07569	52	25.0519	3.09e-05	Abca1,Abl2,Abra,Arfgef2,Arhgap26,Arhgap28,Arhgap35,Arhgef2,Arhgef28,Auts2,Auts2,Cbl,Cdc42bpa,Cdh2,Cdon,Chn1,Cul3,Dab2ip,Dennd1a,Dennd4a,Dgki,Dlc1,Dock2,Eps8,Fgf10,Garnl3,Igf1,Iqsec3,Itga3,Itpkb,Mapkap1,Mapre2,Net1,Nrg1,Nrp1,Ophn1,Pik3cg,Prag1,Psd,Psd3,Ralgapa2,Ralgps2,Rap1gap2,Rasgrf1,Robo1,Sh2b2,Sipa1l1,Sipa1l2,Slit2,Spry2,Syngap1,Tgfb2	ENSFDAG00000001218,ENSFDAG00000002280,ENSFDAG00000002693,ENSFDAG00000002987,ENSFDAG00000003325,ENSFDAG00000004026,ENSFDAG00000004497,ENSFDAG00000004907,ENSFDAG00000005706,ENSFDAG00000005790,ENSFDAG00000006090,ENSFDAG00000007589,ENSFDAG00000007610,ENSFDAG00000007990,ENSFDAG00000008214,ENSFDAG00000008256,ENSFDAG00000008332,ENSFDAG00000009150,ENSFDAG00000009219,ENSFDAG00000009429,ENSFDAG00000009473,…	Primed-enhancers_Liver_10091,Primed-enhancers_Liver_11353,Primed-enhancers_Liver_12439,Primed-enhancers_Liver_12443,Primed-enhancers_Liver_14627,Primed-enhancers_Liver_16193,Primed-enhancers_Liver_16198,Primed-enhancers_Liver_16246,Primed-enhancers_Liver_16250,Primed-enhancers_Liver_17523,Primed-enhancers_Liver_17526,Primed-enhancers_Liver_1959,Primed-enhancers_Liver_1973,Primed-enhancers_Liver_2…
GO:0008356	asymmetric cell division	4.21582	21	4.98124	2.25e-05	4.33101	8	1.84715	0.00491	Actr3,Arhgef2,Dicer1,Etv5,Insc,Sox5,Wnt9b,Zbtb16	ENSFDAG00000003568,ENSFDAG00000004755,ENSFDAG00000008006,ENSFDAG00000012478,ENSFDAG00000015155,ENSFDAG00000015784,ENSFDAG00000021287,ENSFDAG00000021387	Primed-enhancers_Liver_12958,Primed-enhancers_Liver_17039,Primed-enhancers_Liver_28472,Primed-enhancers_Liver_28473,Primed-enhancers_Liver_2942,Primed-enhancers_Liver_47384,Primed-enhancers_Liver_63185,Primed-enhancers_Liver_63187,Primed-enhancers_Liver_63209,Primed-enhancers_Liver_63210,Primed-enhancers_Liver_63223,Primed-enhancers_Liver_63241,Primed-enhancers_Liver_63264,Primed-enhancers_Liver_…
GO:0060348	bone development	2.31184	51	22.0604	2.4e-05	2.11269	20	9.46662	0.0154	Asxl1,Bmp2,Bmp4,Cadm1,Dym,Fgfr2,Gja6,Gli3,Itgb6,Lrp5,Map2k6,Map3k7,Pdgfa,Rarb,Rpl13,Sh3pxd2b,Smad1,Sparc,Tmem38b,Tnfsf11	ENSFDAG00000000362,ENSFDAG00000002571,ENSFDAG00000005632,ENSFDAG00000006096,ENSFDAG00000007714,ENSFDAG00000009044,ENSFDAG00000010109,ENSFDAG00000011119,ENSFDAG00000011310,ENSFDAG00000011476,ENSFDAG00000011655,ENSFDAG00000013212,ENSFDAG00000013347,ENSFDAG00000014421,ENSFDAG00000014474,ENSFDAG00000016065,ENSFDAG00000017357,ENSFDAG00000018033,ENSFDAG00000018458,ENSFDAG00000018863	Primed-enhancers_Liver_10617,Primed-enhancers_Liver_13389,Primed-enhancers_Liver_13390,Primed-enhancers_Liver_13392,Primed-enhancers_Liver_17758,Primed-enhancers_Liver_17763,Primed-enhancers_Liver_21294,Primed-enhancers_Liver_21297,Primed-enhancers_Liver_21300,Primed-enhancers_Liver_21304,Primed-enhancers_Liver_21312,Primed-enhancers_Liver_21317,Primed-enhancers_Liver_21346,Primed-enhancers_Liver…
GO:0150115	cell-substrate junction organization	2.31653	50	21.584	2.91e-05	2.03292	23	11.3138	0.0128	Clasp1,Cttn,Dlc1,Dst,Efna5,Itga2,Mapre2,Nrp1,Pdpk1,Peak1,Pik3r1,Pten,Ptk2,Ptpra,Ptprk,Rhod,Rock1,Smad3,Sorbs1,Thy1,Tns1,Vegfa,Whamm	ENSFDAG00000000042,ENSFDAG00000002175,ENSFDAG00000002748,ENSFDAG00000004696,ENSFDAG00000004907,ENSFDAG00000006304,ENSFDAG00000007035,ENSFDAG00000008095,ENSFDAG00000008883,ENSFDAG00000009240,ENSFDAG00000010167,ENSFDAG00000011943,ENSFDAG00000012484,ENSFDAG00000012890,ENSFDAG00000012942,ENSFDAG00000013054,ENSFDAG00000013386,ENSFDAG00000013772,ENSFDAG00000014357,ENSFDAG00000016677,ENSFDAG00000016928,…	Primed-enhancers_Liver_1683,Primed-enhancers_Liver_1684,Primed-enhancers_Liver_1685,Primed-enhancers_Liver_1707,Primed-enhancers_Liver_20301,Primed-enhancers_Liver_20334,Primed-enhancers_Liver_20342,Primed-enhancers_Liver_20904,Primed-enhancers_Liver_26335,Primed-enhancers_Liver_2809,Primed-enhancers_Liver_31319,Primed-enhancers_Liver_32246,Primed-enhancers_Liver_32685,Primed-enhancers_Liver_3396…
GO:0016311	dephosphorylation	1.66322	118	70.9467	3.7e-05	1.81115	69	38.0974	7.87e-05	Acp6,Acpp,Ahr,Bmp2,Btrc,Ctdspl2,Dlc1,Dusp11,Dusp14,Dusp26,Dusp27,Dusp4,Eya3,Eya4,Fbxw11,Gna12,Ifng,Itga2,Jak2,Magi2,Mfhas1,Mgat5,Mtm1,Mtmr12,Mtmr9,Nck1,Npnt,Nt5c,Pawr,Phlpp1,Plek,Plpp1,Plpp3,Pp2d1,Ppargc1b,Ppm1a,Ppm1h,Ppm1l,Ppp1cb,Ppp2ca,Ppp2ca,Ppp2r1a,Ppp2r1b,Ppp2r2a,Ppp2r3a,Ppp2r5c,Ppp3ca,Ppp6r3,Pten,Ptpn20,Ptpra,Ptprk,Ptprr,Ptprt,Pxylp1,Rock1,Rock2,Sgpp2,Smad3,Sppl3,Ssh1,Swap70,Synj2,Tgfb1,Tgf…	ENSFDAG00000001497,ENSFDAG00000001511,ENSFDAG00000002642,ENSFDAG00000003992,ENSFDAG00000004002,ENSFDAG00000004399,ENSFDAG00000004696,ENSFDAG00000005130,ENSFDAG00000005166,ENSFDAG00000005537,ENSFDAG00000005741,ENSFDAG00000005940,ENSFDAG00000005951,ENSFDAG00000006046,ENSFDAG00000006304,ENSFDAG00000006673,ENSFDAG00000007035,ENSFDAG00000007271,ENSFDAG00000008083,ENSFDAG00000008260,ENSFDAG00000008398,…	Primed-enhancers_Liver_10023,Primed-enhancers_Liver_10025,Primed-enhancers_Liver_10472,Primed-enhancers_Liver_11956,Primed-enhancers_Liver_13582,Primed-enhancers_Liver_14369,Primed-enhancers_Liver_14771,Primed-enhancers_Liver_15680,Primed-enhancers_Liver_17207,Primed-enhancers_Liver_1891,Primed-enhancers_Liver_19776,Primed-enhancers_Liver_19779,Primed-enhancers_Liver_20806,Primed-enhancers_Liver_…
GO:0032330	regulation of chondrocyte differentiation	2.37193	47	19.8151	3.82e-05	2.94508	17	5.77233	0.00117	Bmp4,Ctnnb1,Gli2,Gli3,Lnpk,Maf,Mkx,Rarb,Six2,Smad3,Smad7,Sox5,Sox6,Sox9,Thrb,Trps1,Zbtb16	ENSFDAG00000004569,ENSFDAG00000006096,ENSFDAG00000008006,ENSFDAG00000009044,ENSFDAG00000009384,ENSFDAG00000010014,ENSFDAG00000012104,ENSFDAG00000012415,ENSFDAG00000012545,ENSFDAG00000012886,ENSFDAG00000014357,ENSFDAG00000014810,ENSFDAG00000015084,ENSFDAG00000016628,ENSFDAG00000017680,ENSFDAG00000018863,ENSFDAG00000021387	Primed-enhancers_Liver_13448,Primed-enhancers_Liver_13470,Primed-enhancers_Liver_17758,Primed-enhancers_Liver_17763,Primed-enhancers_Liver_21294,Primed-enhancers_Liver_21297,Primed-enhancers_Liver_21300,Primed-enhancers_Liver_21304,Primed-enhancers_Liver_21312,Primed-enhancers_Liver_21317,Primed-enhancers_Liver_21346,Primed-enhancers_Liver_21350,Primed-enhancers_Liver_21381,Primed-enhancers_Liver…
GO:0030324	lung development	2.00167	67	33.472	4.07e-05	2.2251	28	12.5837	0.00138	Ap3b1,Bmp4,Cftr,Clcn2,Ctnnb1,Cux1,Dicer1,Epas1,Fgf10,Fgfr1,Fgfr2,Foxp1,Gli2,Gli3,Gpc3,Hmgb1,Igf1,Itga3,Nfib,Nkx2-9,Nphp3,Smad2,Sp3,Sparc,Spry2,Tshz3,Vegfa,Wnt5a	ENSFDAG00000002080,ENSFDAG00000002748,ENSFDAG00000002894,ENSFDAG00000003152,ENSFDAG00000005890,ENSFDAG00000006135,ENSFDAG00000007616,ENSFDAG00000009044,ENSFDAG00000009317,ENSFDAG00000009384,ENSFDAG00000010527,ENSFDAG00000012167,ENSFDAG00000012354,ENSFDAG00000012545,ENSFDAG00000013267,ENSFDAG00000014114,ENSFDAG00000014315,ENSFDAG00000016290,ENSFDAG00000017616,ENSFDAG00000017883,ENSFDAG00000018033,…	Primed-enhancers_Liver_10617,Primed-enhancers_Liver_12439,Primed-enhancers_Liver_12443,Primed-enhancers_Liver_15279,Primed-enhancers_Liver_17039,Primed-enhancers_Liver_17758,Primed-enhancers_Liver_17763,Primed-enhancers_Liver_190,Primed-enhancers_Liver_199,Primed-enhancers_Liver_19984,Primed-enhancers_Liver_19996,Primed-enhancers_Liver_20961,Primed-enhancers_Liver_20962,Primed-enhancers_Liver_209…
GO:0090092	regulation of transmembrane receptor protein serine/threonine kinase signaling pathway	1.70974	101	59.0734	7.83e-05	1.90918	54	28.2844	0.000141	Acvr1,Acvr2a,Bmp2,Bmp3,Bmp4,Cdkn2b,Chrd,Crb2,Crebbp,Crim1,Ctdspl2,Dab2,Dact2,Dlx1,Fermt1,Fgf10,Gata4,Gdf10,Got1,Gpc3,Hipk2,Inhba,Inhbb,Itga3,Jak2,Lats1,Magi2,Npnt,Nrep,Onecut1,Onecut2,Pelo,Pparg,Ppm1a,Rasl11b,Rnf165,Sap30,Sin3a,Skor1,Skor2,Smad2,Smad3,Smad7,Sorl1,Spry2,Strap,Suds3,Tgfb1,Tgfb2,Tgfb3,Ube2o,Vwc2l,Wfikkn2,Wnt5a	ENSFDAG00000000501,ENSFDAG00000000530,ENSFDAG00000000810,ENSFDAG00000001117,ENSFDAG00000002076,ENSFDAG00000002894,ENSFDAG00000003278,ENSFDAG00000004399,ENSFDAG00000004474,ENSFDAG00000004743,ENSFDAG00000005173,ENSFDAG00000005671,ENSFDAG00000005890,ENSFDAG00000007193,ENSFDAG00000007195,ENSFDAG00000007952,ENSFDAG00000008083,ENSFDAG00000008711,ENSFDAG00000009044,ENSFDAG00000010085,ENSFDAG00000010372,…	Primed-enhancers_Liver_12365,Primed-enhancers_Liver_12381,Primed-enhancers_Liver_12439,Primed-enhancers_Liver_12443,Primed-enhancers_Liver_13667,Primed-enhancers_Liver_1564,Primed-enhancers_Liver_15680,Primed-enhancers_Liver_16500,Primed-enhancers_Liver_17763,Primed-enhancers_Liver_17781,Primed-enhancers_Liver_17791,Primed-enhancers_Liver_17804,Primed-enhancers_Liver_17806,Primed-enhancers_Liver_…
GO:0043547	positive regulation of GTPase activity	1.74552	93	53.2792	8.2e-05	1.86621	53	28.3999	0.000313	Afdn,Arap1,Arhgap29,Arhgap35,Asap1,Asap2,Bin1,Ccl17,Ccl19,Ccr7,Cdkl5,Chn1,Chn2,Dennd1a,Dennd1b,Dock10,Dock11,Dock7,Eif5,Garnl3,Gnao1,Iqsec3,Mapre2,Mex3b,Mmut,Net1,Prex1,Rab3gap1,Rabgap1l,Ralgapa2,Ralgps2,Rap1a,Rap1gap2,Rasgrf1,Rgs4,Rgs6,Ric1,Sipa1l1,Sipa1l2,Snx13,Snx18,Srgap2,Tbc1d1,Tbc1d17,Tbc1d22a,Tbc1d30,Tbc1d4,Tbc1d5,Tbc1d8b,Tbck,Thy1,Usp6nl,Wnt5a	ENSFDAG00000001552,ENSFDAG00000002693,ENSFDAG00000002934,ENSFDAG00000002987,ENSFDAG00000004497,ENSFDAG00000004907,ENSFDAG00000005890,ENSFDAG00000006063,ENSFDAG00000006373,ENSFDAG00000006591,ENSFDAG00000006956,ENSFDAG00000007742,ENSFDAG00000008159,ENSFDAG00000008196,ENSFDAG00000008256,ENSFDAG00000009150,ENSFDAG00000009219,ENSFDAG00000009238,ENSFDAG00000010313,ENSFDAG00000010354,ENSFDAG00000010405,…	Primed-enhancers_Liver_11353,Primed-enhancers_Liver_12754,Primed-enhancers_Liver_14426,Primed-enhancers_Liver_14722,Primed-enhancers_Liver_14726,Primed-enhancers_Liver_14771,Primed-enhancers_Liver_16193,Primed-enhancers_Liver_16198,Primed-enhancers_Liver_16246,Primed-enhancers_Liver_16250,Primed-enhancers_Liver_16253,Primed-enhancers_Liver_16255,Primed-enhancers_Liver_16256,Primed-enhancers_Liver…
GO:0048009	insulin-like growth factor receptor signaling pathway	2.90729	30	10.3189	8.2e-05	3.14982	12	3.80974	0.00517	Ar,Atxn1,Atxn7,Bmp2,Eif2ak3,Ghsr,Igf1,Igf1r,Irs1,Pik3r1,Plcb1,Pou1f1	ENSFDAG00000006381,ENSFDAG00000008095,ENSFDAG00000010527,ENSFDAG00000010961,ENSFDAG00000011655,ENSFDAG00000012205,ENSFDAG00000017230,ENSFDAG00000018035,ENSFDAG00000018194,ENSFDAG00000018637,ENSFDAG00000019741,ENSFDAG00000020905	Primed-enhancers_Liver_18689,Primed-enhancers_Liver_18695,Primed-enhancers_Liver_2001,Primed-enhancers_Liver_2013,Primed-enhancers_Liver_20301,Primed-enhancers_Liver_20334,Primed-enhancers_Liver_20342,Primed-enhancers_Liver_21250,Primed-enhancers_Liver_29741,Primed-enhancers_Liver_43490,Primed-enhancers_Liver_43508,Primed-enhancers_Liver_43510,Primed-enhancers_Liver_43515,Primed-enhancers_Liver_4…
GO:0046578	regulation of Ras protein signal transduction	1.84545	78	42.2662	8.46e-05	1.91969	41	21.3576	0.00123	Abca1,Abl2,Abra,Arfgef2,Arhgap35,Arhgef2,Arhgef28,Auts2,Auts2,Cbl,Cdh2,Cul3,Dab2ip,Dennd1a,Dennd4a,Dgki,Dlc1,Dock2,Eps8,Fgf10,Igf1,Iqsec3,Itga3,Itpkb,Mapkap1,Mapre2,Net1,Nrg1,Nrp1,Ophn1,Pik3cg,Prag1,Psd,Psd3,Ralgps2,Rasgrf1,Robo1,Sh2b2,Spry2,Syngap1,Tgfb2	ENSFDAG00000001218,ENSFDAG00000002987,ENSFDAG00000003325,ENSFDAG00000004026,ENSFDAG00000004497,ENSFDAG00000004907,ENSFDAG00000005706,ENSFDAG00000005790,ENSFDAG00000006090,ENSFDAG00000007589,ENSFDAG00000007990,ENSFDAG00000008214,ENSFDAG00000008332,ENSFDAG00000009150,ENSFDAG00000009429,ENSFDAG00000010192,ENSFDAG00000010527,ENSFDAG00000010642,ENSFDAG00000010998,ENSFDAG00000011298,ENSFDAG00000011303,…	Primed-enhancers_Liver_10091,Primed-enhancers_Liver_12439,Primed-enhancers_Liver_12443,Primed-enhancers_Liver_14627,Primed-enhancers_Liver_17523,Primed-enhancers_Liver_17526,Primed-enhancers_Liver_1959,Primed-enhancers_Liver_1973,Primed-enhancers_Liver_20126,Primed-enhancers_Liver_20961,Primed-enhancers_Liver_20962,Primed-enhancers_Liver_20965,Primed-enhancers_Liver_20966,Primed-enhancers_Liver_2…
GO:0003383	apical constriction	6.02302	13	2.15839	8.46e-05	6.92961	4	0.577233	0.0149	Ccdc88c,Frmd6,Pard3,Rock1	ENSFDAG00000009617,ENSFDAG00000012484,ENSFDAG00000014158,ENSFDAG00000015988	Primed-enhancers_Liver_15548,Primed-enhancers_Liver_16881,Primed-enhancers_Liver_16886,Primed-enhancers_Liver_33969,Primed-enhancers_Liver_33980,Primed-enhancers_Liver_33981,Primed-enhancers_Liver_33986,Primed-enhancers_Liver_71201,Primed-enhancers_Liver_71263,Primed-enhancers_Liver_71272,Primed-enhancers_Liver_71273,Primed-enhancers_Liver_71282,Primed-enhancers_Liver_71283
GO:0010862	positive regulation of pathway-restricted SMAD protein phosphorylation	2.80624	31	11.0468	9.31e-05	2.6811	13	4.84876	0.0127	Acvr1,Acvr2a,Bmp2,Bmp3,Bmp4,Dab2,Gdf10,Inhba,Inhbb,Pparg,Tgfb1,Tgfb2,Tgfb3	ENSFDAG00000000530,ENSFDAG00000000810,ENSFDAG00000001117,ENSFDAG00000004743,ENSFDAG00000005173,ENSFDAG00000007195,ENSFDAG00000008083,ENSFDAG00000009044,ENSFDAG00000010372,ENSFDAG00000011655,ENSFDAG00000012435,ENSFDAG00000017432,ENSFDAG00000021196	Primed-enhancers_Liver_16500,Primed-enhancers_Liver_17763,Primed-enhancers_Liver_17781,Primed-enhancers_Liver_17791,Primed-enhancers_Liver_17804,Primed-enhancers_Liver_17806,Primed-enhancers_Liver_22137,Primed-enhancers_Liver_22351,Primed-enhancers_Liver_22352,Primed-enhancers_Liver_24601,Primed-enhancers_Liver_2852,Primed-enhancers_Liver_40677,Primed-enhancers_Liver_40694,Primed-enhancers_Liver_…
GO:0060395	SMAD protein signal transduction	2.28756	45	19.6716	9.8e-05	2.50468	24	9.58207	0.000719	Bmp2,Bmp3,Bmp4,Dab2,Gata4,Gdf10,Hipk2,Hnf1a,Inhba,Inhbb,Itgb6,Jak2,Magi2,Pparg,Smad1,Smad2,Smad3,Smad7,Sub1,Tgfb1,Tgfb2,Tgfb3,Wwtr1,Zmiz1	ENSFDAG00000000501,ENSFDAG00000000530,ENSFDAG00000000810,ENSFDAG00000002894,ENSFDAG00000004743,ENSFDAG00000005173,ENSFDAG00000005671,ENSFDAG00000007068,ENSFDAG00000007714,ENSFDAG00000008083,ENSFDAG00000009044,ENSFDAG00000010085,ENSFDAG00000010372,ENSFDAG00000011655,ENSFDAG00000011718,ENSFDAG00000012435,ENSFDAG00000014357,ENSFDAG00000014421,ENSFDAG00000016074,ENSFDAG00000017179,ENSFDAG00000017432,…	Primed-enhancers_Liver_16500,Primed-enhancers_Liver_17763,Primed-enhancers_Liver_17781,Primed-enhancers_Liver_17791,Primed-enhancers_Liver_17804,Primed-enhancers_Liver_17806,Primed-enhancers_Liver_21723,Primed-enhancers_Liver_22137,Primed-enhancers_Liver_22351,Primed-enhancers_Liver_22352,Primed-enhancers_Liver_22974,Primed-enhancers_Liver_24601,Primed-enhancers_Liver_24845,Primed-enhancers_Liver…
GO:0007167	enzyme-linked receptor protein signaling pathway	1.32902	285	214.444	0.000101	1.69134	173	102.286	1.57e-09	Abl2,Acvr1,Acvr1c,Acvr2a,Afap1l2,Angpt1,Angptl1,Anks1b,Ar,Atxn1,Atxn7,Bcar1,Blk,Bmp2,Bmp3,Bmp4,Braf,Cbl,Cblb,Cd59b,Cdkn2b,Chn1,Chrd,Col1a1,Crb2,Crebbp,Crim1,Ctdspl2,Ctnnb1,Dab2,Dab2ip,Dact2,Dcp1a,Dll1,Dlx1,Dlx3,Dlx5,Efna5,Efnb1,Eif2ak3,Epgn,Epha4,Ephb1,Ephb3,Ereg,Esr1,Fam20c,Fam72a,Fam83g,Fat4,Fermt1,Fgf10,Fgf3,Fgfr1,Fgfr2,Fshr,Gab1,Garem1,Gata4,Gdf10,Gfra2,Ghsr,Got1,Gpc3,Gprc5a,Grb14,Hhip,Hipk2,…	ENSFDAG00000000057,ENSFDAG00000000501,ENSFDAG00000000530,ENSFDAG00000000810,ENSFDAG00000001117,ENSFDAG00000001188,ENSFDAG00000002076,ENSFDAG00000002080,ENSFDAG00000002571,ENSFDAG00000002693,ENSFDAG00000002748,ENSFDAG00000002894,ENSFDAG00000003104,ENSFDAG00000003167,ENSFDAG00000003278,ENSFDAG00000003357,ENSFDAG00000003824,ENSFDAG00000004129,ENSFDAG00000004399,ENSFDAG00000004474,ENSFDAG00000004696,…	Primed-enhancers_Liver_10908,Primed-enhancers_Liver_11704,Primed-enhancers_Liver_12365,Primed-enhancers_Liver_12381,Primed-enhancers_Liver_12421,Primed-enhancers_Liver_12439,Primed-enhancers_Liver_12443,Primed-enhancers_Liver_12616,Primed-enhancers_Liver_1304,Primed-enhancers_Liver_1305,Primed-enhancers_Liver_1307,Primed-enhancers_Liver_13448,Primed-enhancers_Liver_13470,Primed-enhancers_Liver_13…
GO:0032924	activin receptor signaling pathway	2.90181	29	9.99376	0.000101	2.38205	11	4.61786	0.0469	Acvr1,Acvr1c,Acvr2a,Dact2,Fgf10,Inhba,Inhbb,Magi2,Smad2,Smad3,Smad7	ENSFDAG00000001117,ENSFDAG00000002894,ENSFDAG00000003167,ENSFDAG00000007195,ENSFDAG00000013313,ENSFDAG00000014357,ENSFDAG00000017432,ENSFDAG00000017616,ENSFDAG00000017680,ENSFDAG00000018047,ENSFDAG00000021196	Primed-enhancers_Liver_17763,Primed-enhancers_Liver_17781,Primed-enhancers_Liver_17791,Primed-enhancers_Liver_17804,Primed-enhancers_Liver_17806,Primed-enhancers_Liver_20961,Primed-enhancers_Liver_20962,Primed-enhancers_Liver_20965,Primed-enhancers_Liver_20966,Primed-enhancers_Liver_20967,Primed-enhancers_Liver_2852,Primed-enhancers_Liver_31168,Primed-enhancers_Liver_31170,Primed-enhancers_Liver_…
GO:0051345	positive regulation of hydrolase activity	1.49494	158	105.69	0.000106	1.69775	98	57.7233	1.54e-05	Abl2,Acvr1c,Afdn,Akirin2,Apaf1,App,Arap1,Arhgap29,Arhgap35,Asap1,Asap2,Bcl2l11,Bin1,Bmp2,Ccl17,Ccl19,Ccr7,Cdkl5,Chn1,Chn2,Cycs,Ddx3x,Dennd1a,Dennd1b,Dlc1,Dock10,Dock11,Dock7,Eif2ak3,Eif5,Epha4,Esr1,Fgfr1,Fgfr2,Garnl3,Gna12,Gnao1,Hmgb1,Hspd1,Ifng,Iqsec3,Itga2,Jak2,Magi2,Map3k5,Mapre2,Mex3b,Mmut,Mtmr9,Myc,Net1,Nod1,Npnt,Pawr,Plek,Pml,Pparg,Ppargc1b,Ppp2ca,Ppp2ca,Prex1,Prkd2,Prss22,Rab3gap1,Rabgap1l…	ENSFDAG00000001496,ENSFDAG00000001552,ENSFDAG00000002080,ENSFDAG00000002693,ENSFDAG00000002748,ENSFDAG00000002934,ENSFDAG00000002987,ENSFDAG00000003167,ENSFDAG00000003960,ENSFDAG00000004497,ENSFDAG00000004743,ENSFDAG00000004839,ENSFDAG00000004907,ENSFDAG00000005504,ENSFDAG00000005748,ENSFDAG00000005890,ENSFDAG00000005951,ENSFDAG00000006063,ENSFDAG00000006373,ENSFDAG00000006591,ENSFDAG00000006956,…	Primed-enhancers_Liver_10472,Primed-enhancers_Liver_11353,Primed-enhancers_Liver_12754,Primed-enhancers_Liver_14369,Primed-enhancers_Liver_14426,Primed-enhancers_Liver_14722,Primed-enhancers_Liver_14726,Primed-enhancers_Liver_14771,Primed-enhancers_Liver_16193,Primed-enhancers_Liver_16198,Primed-enhancers_Liver_16246,Primed-enhancers_Liver_16250,Primed-enhancers_Liver_16253,Primed-enhancers_Liver…
GO:0007044	cell-substrate junction assembly	2.28696	44	19.2395	0.000119	1.9772	21	10.6211	0.0233	Clasp1,Cttn,Dlc1,Dst,Efna5,Itga2,Nrp1,Pdpk1,Peak1,Pten,Ptk2,Ptpra,Ptprk,Rhod,Rock1,Smad3,Sorbs1,Thy1,Tns1,Vegfa,Whamm	ENSFDAG00000000042,ENSFDAG00000002175,ENSFDAG00000002748,ENSFDAG00000004696,ENSFDAG00000006304,ENSFDAG00000007035,ENSFDAG00000008883,ENSFDAG00000009240,ENSFDAG00000010167,ENSFDAG00000011943,ENSFDAG00000012484,ENSFDAG00000012890,ENSFDAG00000012942,ENSFDAG00000013054,ENSFDAG00000013386,ENSFDAG00000013772,ENSFDAG00000014357,ENSFDAG00000016677,ENSFDAG00000016928,ENSFDAG00000016945,ENSFDAG00000018081	Primed-enhancers_Liver_1683,Primed-enhancers_Liver_1684,Primed-enhancers_Liver_1685,Primed-enhancers_Liver_1707,Primed-enhancers_Liver_20904,Primed-enhancers_Liver_26335,Primed-enhancers_Liver_2809,Primed-enhancers_Liver_31319,Primed-enhancers_Liver_32246,Primed-enhancers_Liver_32685,Primed-enhancers_Liver_33969,Primed-enhancers_Liver_33980,Primed-enhancers_Liver_33981,Primed-enhancers_Liver_3398…
GO:0038066	p38MAPK cascade	2.64632	32	12.0922	0.000174	2.65164	15	5.65688	0.00705	Bmp2,Bmp4,Dab2ip,Dlg1,Gm28047,Hand2,Lep,Mfhas1,Oprk1,Phlpp1,Pja2,Rell1,Sash1,Vegfa,Zfp36l1	ENSFDAG00000002748,ENSFDAG00000005242,ENSFDAG00000006229,ENSFDAG00000007182,ENSFDAG00000008260,ENSFDAG00000009044,ENSFDAG00000009453,ENSFDAG00000011556,ENSFDAG00000011655,ENSFDAG00000013374,ENSFDAG00000013790,ENSFDAG00000014938,ENSFDAG00000016565,ENSFDAG00000016684,ENSFDAG00000017614	Primed-enhancers_Liver_16024,Primed-enhancers_Liver_16027,Primed-enhancers_Liver_16028,Primed-enhancers_Liver_16029,Primed-enhancers_Liver_16036,Primed-enhancers_Liver_22351,Primed-enhancers_Liver_22352,Primed-enhancers_Liver_2732,Primed-enhancers_Liver_27676,Primed-enhancers_Liver_28757,Primed-enhancers_Liver_32246,Primed-enhancers_Liver_32752,Primed-enhancers_Liver_32753,Primed-enhancers_Liver_…
GO:0051336	regulation of hydrolase activity	1.36014	234	172.041	0.000228	1.41359	141	99.7458	0.00054	Abl2,Acvr1c,Afdn,Ahr,Akirin2,Apaf1,App,Aqp1,Arap1,Arhgap29,Arhgap35,Asap1,Asap2,Bcl2l11,Bin1,Bmp2,Cblb,Ccl17,Ccl19,Ccr7,Cd44,Cdkl5,Chn1,Chn2,Crb2,Cycs,Dab2ip,Ddx3x,Dennd1a,Dennd1b,Dgki,Dlc1,Dock10,Dock11,Dock7,Efna5,Eif2ak3,Eif5,Epha4,Ephb3,Esr1,Fgfr1,Fgfr2,Gapvd1,Garnl3,Gna12,Gnao1,Gpc3,Hdac9,Hmgb1,Hnf1a,Hspd1,Ifng,Igf1,Iqsec3,Itga2,Jak2,Klf4,Magi2,Map2k5,Map3k5,Mapre2,Mex3b,Mgat5,Mmut,Mtmr9,Myc…	ENSFDAG00000000095,ENSFDAG00000000786,ENSFDAG00000001288,ENSFDAG00000001496,ENSFDAG00000001552,ENSFDAG00000002080,ENSFDAG00000002642,ENSFDAG00000002693,ENSFDAG00000002748,ENSFDAG00000002934,ENSFDAG00000002987,ENSFDAG00000003167,ENSFDAG00000003960,ENSFDAG00000004497,ENSFDAG00000004743,ENSFDAG00000004839,ENSFDAG00000004907,ENSFDAG00000005504,ENSFDAG00000005741,ENSFDAG00000005748,ENSFDAG00000005890,…	Primed-enhancers_Liver_10472,Primed-enhancers_Liver_11353,Primed-enhancers_Liver_11446,Primed-enhancers_Liver_12365,Primed-enhancers_Liver_12381,Primed-enhancers_Liver_12754,Primed-enhancers_Liver_14369,Primed-enhancers_Liver_14426,Primed-enhancers_Liver_14718,Primed-enhancers_Liver_14722,Primed-enhancers_Liver_14726,Primed-enhancers_Liver_14771,Primed-enhancers_Liver_16193,Primed-enhancers_Liver…
GO:0031098	stress-activated protein kinase signaling cascade	1.66562	97	58.2366	0.00023	1.88925	53	28.0535	0.000225	App,Bmp2,Bmp4,Ccdc88c,Ccl19,Dab2,Dab2ip,Dact1,Dlg1,Ephb1,Fgf14,Gm28047,Grik2,Hacd3,Hand2,Hipk2,Hmgb1,Hmgcr,Igf1r,Lep,Map2k6,Map3k1,Map3k13,Map3k5,Map3k7,Map4k2,Mfhas1,Mid1,Nod1,Oprk1,Pbk,Phlpp1,Pja2,Plcb1,Ptk2,Rell1,Ripk2,Sash1,Serpinf2,Sh3rf1,Smad3,Spag9,Stk3,Taok3,Tgfb2,Tlr3,Tnfsf11,Usp25,Vegfa,Wnt16,Wnt5a,Zfp36l1,Zfp622	ENSFDAG00000000501,ENSFDAG00000002571,ENSFDAG00000002702,ENSFDAG00000002748,ENSFDAG00000003960,ENSFDAG00000005242,ENSFDAG00000005440,ENSFDAG00000005504,ENSFDAG00000005890,ENSFDAG00000006183,ENSFDAG00000006229,ENSFDAG00000006381,ENSFDAG00000006711,ENSFDAG00000006872,ENSFDAG00000007182,ENSFDAG00000007439,ENSFDAG00000008260,ENSFDAG00000008823,ENSFDAG00000009044,ENSFDAG00000009317,ENSFDAG00000009437,…	Primed-enhancers_Liver_11446,Primed-enhancers_Liver_12365,Primed-enhancers_Liver_13389,Primed-enhancers_Liver_13390,Primed-enhancers_Liver_13392,Primed-enhancers_Liver_15615,Primed-enhancers_Liver_16024,Primed-enhancers_Liver_16027,Primed-enhancers_Liver_16028,Primed-enhancers_Liver_16029,Primed-enhancers_Liver_16036,Primed-enhancers_Liver_16881,Primed-enhancers_Liver_16886,Primed-enhancers_Liver…
GO:0051098	regulation of binding	1.54409	128	82.8965	0.000237	1.74549	80	45.8323	5.78e-05	Abl2,Ace,Actr3,Add1,Amfr,Angpt1,Aplp2,App,Arhgap28,Atp2a2,Blk,Bmp2,Bmp4,Btaf1,Cblb,Cdon,Crtac1,Csf3,Ctnnb1,Cycs,Dab2,Dact1,Disc1,Dtnbp1,Eif2ak3,Eif3e,Epb41,Epha4,Hand2,Hipk2,Hmbox1,Hmbox1,Hmgb1,Ide,Ifng,Igf1,Isl1,Itga2,Jak2,Klf4,Lhx2,Mapre3,Mark3,Myc,Neurod1,Nfib,Nphp3,P2ry1,Pdx1,Pex14,Plcl1,Plcl2,Pparg,Ppp2ca,Ppp2ca,Ppp3ca,Psen1,Psme3ip1,Ralb,Ripk2,Rnf220,Rock1,Runx1t1,Sin3a,Smad2,Smad3,Snapin,S…	ENSFDAG00000000501,ENSFDAG00000000589,ENSFDAG00000002894,ENSFDAG00000003190,ENSFDAG00000003407,ENSFDAG00000003809,ENSFDAG00000004743,ENSFDAG00000004755,ENSFDAG00000004839,ENSFDAG00000005217,ENSFDAG00000005504,ENSFDAG00000005827,ENSFDAG00000005890,ENSFDAG00000005951,ENSFDAG00000006049,ENSFDAG00000006183,ENSFDAG00000006703,ENSFDAG00000006826,ENSFDAG00000007035,ENSFDAG00000007370,ENSFDAG00000007610,…	Primed-enhancers_Liver_10472,Primed-enhancers_Liver_1075,Primed-enhancers_Liver_1077,Primed-enhancers_Liver_1078,Primed-enhancers_Liver_12365,Primed-enhancers_Liver_12381,Primed-enhancers_Liver_12720,Primed-enhancers_Liver_13060,Primed-enhancers_Liver_15615,Primed-enhancers_Liver_16311,Primed-enhancers_Liver_17293,Primed-enhancers_Liver_17295,Primed-enhancers_Liver_17299,Primed-enhancers_Liver_17…
GO:0090100	positive regulation of transmembrane receptor protein serine/threonine kinase signaling pathway	2.02177	53	26.2147	0.000304	2.20636	27	12.2373	0.002	Acvr1,Acvr2a,Bmp2,Bmp3,Bmp4,Cdkn2b,Crb2,Crebbp,Dab2,Fermt1,Gata4,Gdf10,Got1,Gpc3,Hipk2,Inhba,Inhbb,Jak2,Npnt,Pelo,Pparg,Rnf165,Smad2,Tgfb1,Tgfb2,Tgfb3,Ube2o	ENSFDAG00000000501,ENSFDAG00000000530,ENSFDAG00000000810,ENSFDAG00000001117,ENSFDAG00000002076,ENSFDAG00000002894,ENSFDAG00000004474,ENSFDAG00000004743,ENSFDAG00000005173,ENSFDAG00000005671,ENSFDAG00000007195,ENSFDAG00000007952,ENSFDAG00000008083,ENSFDAG00000008711,ENSFDAG00000009044,ENSFDAG00000010085,ENSFDAG00000010372,ENSFDAG00000011655,ENSFDAG00000011692,ENSFDAG00000012174,ENSFDAG00000012435,…	Primed-enhancers_Liver_13667,Primed-enhancers_Liver_16500,Primed-enhancers_Liver_17763,Primed-enhancers_Liver_17781,Primed-enhancers_Liver_17791,Primed-enhancers_Liver_17804,Primed-enhancers_Liver_17806,Primed-enhancers_Liver_20904,Primed-enhancers_Liver_22137,Primed-enhancers_Liver_22351,Primed-enhancers_Liver_22352,Primed-enhancers_Liver_22974,Primed-enhancers_Liver_24601,Primed-enhancers_Liver…
GO:1904177	regulation of adipose tissue development	4.75623	14	2.9435	0.000304	4.33101	6	1.38536	0.0196	Klf7,Ncoa1,Ncoa2,Pparg,Sh3pxd2b,Sorl1	ENSFDAG00000004743,ENSFDAG00000007436,ENSFDAG00000011476,ENSFDAG00000014292,ENSFDAG00000017412,ENSFDAG00000019085	Primed-enhancers_Liver_1400,Primed-enhancers_Liver_1404,Primed-enhancers_Liver_1407,Primed-enhancers_Liver_14098,Primed-enhancers_Liver_14102,Primed-enhancers_Liver_190,Primed-enhancers_Liver_62303,Primed-enhancers_Liver_72244,Primed-enhancers_Liver_72263,Primed-enhancers_Liver_72277,Primed-enhancers_Liver_72279,Primed-enhancers_Liver_72280,Primed-enhancers_Liver_72294,Primed-enhancers_Liver_9990
GO:0098880	maintenance of postsynaptic specialization structure	4.74879	14	2.94812	0.000304	4.94972	4	0.808126	0.047	Cadm1,Ophn1,Shank2,Syngap1	ENSFDAG00000000362,ENSFDAG00000009429,ENSFDAG00000015077,ENSFDAG00000019409	Primed-enhancers_Liver_31504,Primed-enhancers_Liver_67475,Primed-enhancers_Liver_72617,Primed-enhancers_Liver_72643,Primed-enhancers_Liver_72673,Primed-enhancers_Liver_72681,Primed-enhancers_Liver_72683,Primed-enhancers_Liver_72684,Primed-enhancers_Liver_72692,Primed-enhancers_Liver_72710,Primed-enhancers_Liver_72712,Primed-enhancers_Liver_72720,Primed-enhancers_Liver_72724,Primed-enhancers_Liver…
GO:0006470	protein dephosphorylation	1.68275	90	53.4839	0.000306	1.76849	49	27.7072	0.00184	Btrc,Ctdspl2,Dlc1,Dusp11,Dusp14,Dusp26,Dusp27,Dusp4,Eya3,Eya4,Fbxw11,Gna12,Jak2,Magi2,Mfhas1,Mgat5,Mtm1,Nck1,Pawr,Phlpp1,Pp2d1,Ppm1a,Ppm1h,Ppm1l,Ppp1cb,Ppp2ca,Ppp2ca,Ppp2r1a,Ppp2r1b,Ppp2r2a,Ppp2r3a,Ppp2r5c,Ppp3ca,Ppp6r3,Pten,Ptpn20,Ptpra,Ptprk,Ptprr,Ptprt,Rock1,Rock2,Sppl3,Ssh1,Swap70,Tgfb1,Tns2,Ubash3b,Vcan	ENSFDAG00000001511,ENSFDAG00000002642,ENSFDAG00000003992,ENSFDAG00000004399,ENSFDAG00000004696,ENSFDAG00000005130,ENSFDAG00000005166,ENSFDAG00000005537,ENSFDAG00000005940,ENSFDAG00000005951,ENSFDAG00000006046,ENSFDAG00000006304,ENSFDAG00000006673,ENSFDAG00000007271,ENSFDAG00000008083,ENSFDAG00000008260,ENSFDAG00000008659,ENSFDAG00000008877,ENSFDAG00000008883,ENSFDAG00000009628,ENSFDAG00000010071,…	Primed-enhancers_Liver_10023,Primed-enhancers_Liver_10025,Primed-enhancers_Liver_10472,Primed-enhancers_Liver_11956,Primed-enhancers_Liver_14369,Primed-enhancers_Liver_15680,Primed-enhancers_Liver_17207,Primed-enhancers_Liver_19776,Primed-enhancers_Liver_19779,Primed-enhancers_Liver_22137,Primed-enhancers_Liver_23207,Primed-enhancers_Liver_23694,Primed-enhancers_Liver_2732,Primed-enhancers_Liver_…
GO:0051403	stress-activated MAPK cascade	1.67142	93	55.6414	0.000317	1.89598	51	26.8991	0.000296	App,Bmp2,Bmp4,Ccl19,Dab2,Dab2ip,Dact1,Dlg1,Ephb1,Fgf14,Gm28047,Grik2,Hacd3,Hand2,Hipk2,Hmgb1,Hmgcr,Igf1r,Lep,Map2k6,Map3k1,Map3k13,Map3k5,Map3k7,Map4k2,Mfhas1,Mid1,Nod1,Oprk1,Pbk,Phlpp1,Pja2,Plcb1,Ptk2,Rell1,Ripk2,Sash1,Serpinf2,Sh3rf1,Smad3,Spag9,Stk3,Taok3,Tgfb2,Tlr3,Tnfsf11,Vegfa,Wnt16,Wnt5a,Zfp36l1,Zfp622	ENSFDAG00000000501,ENSFDAG00000002571,ENSFDAG00000002702,ENSFDAG00000002748,ENSFDAG00000003960,ENSFDAG00000005242,ENSFDAG00000005440,ENSFDAG00000005504,ENSFDAG00000005890,ENSFDAG00000006183,ENSFDAG00000006229,ENSFDAG00000006381,ENSFDAG00000006711,ENSFDAG00000006872,ENSFDAG00000007182,ENSFDAG00000007439,ENSFDAG00000008260,ENSFDAG00000008823,ENSFDAG00000009044,ENSFDAG00000009317,ENSFDAG00000009437,…	Primed-enhancers_Liver_11446,Primed-enhancers_Liver_12365,Primed-enhancers_Liver_13389,Primed-enhancers_Liver_13390,Primed-enhancers_Liver_13392,Primed-enhancers_Liver_15615,Primed-enhancers_Liver_16024,Primed-enhancers_Liver_16027,Primed-enhancers_Liver_16028,Primed-enhancers_Liver_16029,Primed-enhancers_Liver_16036,Primed-enhancers_Liver_190,Primed-enhancers_Liver_199,Primed-enhancers_Liver_200…
GO:1900745	positive regulation of p38MAPK cascade	3.1877	22	6.90153	0.000353	3.20815	10	3.11706	0.0114	Bmp2,Bmp4,Hand2,Lep,Mfhas1,Oprk1,Pja2,Rell1,Sash1,Vegfa	ENSFDAG00000002748,ENSFDAG00000005242,ENSFDAG00000006229,ENSFDAG00000008260,ENSFDAG00000009044,ENSFDAG00000009453,ENSFDAG00000011655,ENSFDAG00000013790,ENSFDAG00000016565,ENSFDAG00000016684	Primed-enhancers_Liver_22351,Primed-enhancers_Liver_22352,Primed-enhancers_Liver_32246,Primed-enhancers_Liver_32752,Primed-enhancers_Liver_32753,Primed-enhancers_Liver_32763,Primed-enhancers_Liver_43490,Primed-enhancers_Liver_43508,Primed-enhancers_Liver_43510,Primed-enhancers_Liver_43515,Primed-enhancers_Liver_43519,Primed-enhancers_Liver_43522,Primed-enhancers_Liver_47,Primed-enhancers_Liver_48…
GO:0008544	epidermis development	2.12357	46	21.6617	0.000374	1.93513	21	10.852	0.0288	Ap3b1,Atp2c1,Bmp4,Dll1,Fgf10,Gab1,Igf1r,Klf4,Klf7,Nab1,Ppard,Ppp3ca,Prkch,Rock1,Rock2,Satb1,Srsf6,Svep1,Tgfb2,Vdr,Zfp36l1	ENSFDAG00000005761,ENSFDAG00000006381,ENSFDAG00000007236,ENSFDAG00000007436,ENSFDAG00000009044,ENSFDAG00000009122,ENSFDAG00000009305,ENSFDAG00000009326,ENSFDAG00000009958,ENSFDAG00000010886,ENSFDAG00000012191,ENSFDAG00000012435,ENSFDAG00000012484,ENSFDAG00000014165,ENSFDAG00000014938,ENSFDAG00000015366,ENSFDAG00000016290,ENSFDAG00000017276,ENSFDAG00000017616,ENSFDAG00000018891,ENSFDAG00000019290	Primed-enhancers_Liver_1400,Primed-enhancers_Liver_1404,Primed-enhancers_Liver_1407,Primed-enhancers_Liver_14369,Primed-enhancers_Liver_15749,Primed-enhancers_Liver_16024,Primed-enhancers_Liver_16027,Primed-enhancers_Liver_16028,Primed-enhancers_Liver_16029,Primed-enhancers_Liver_16036,Primed-enhancers_Liver_19984,Primed-enhancers_Liver_19996,Primed-enhancers_Liver_20269,Primed-enhancers_Liver_20…
GO:0046330	positive regulation of JNK cascade	2.13809	45	21.0468	0.000415	2.1883	24	10.9674	0.00445	App,Ccl19,Dab2,Dab2ip,Hipk2,Hmgb1,Map3k1,Map3k5,Map3k7,Map4k2,Mfhas1,Nod1,Pja2,Plcb1,Ripk2,Serpinf2,Sh3rf1,Stk3,Taok3,Tlr3,Tnfsf11,Wnt16,Wnt5a,Zfp622	ENSFDAG00000000501,ENSFDAG00000002571,ENSFDAG00000003960,ENSFDAG00000005504,ENSFDAG00000005890,ENSFDAG00000008260,ENSFDAG00000009317,ENSFDAG00000009437,ENSFDAG00000009708,ENSFDAG00000010109,ENSFDAG00000010372,ENSFDAG00000011300,ENSFDAG00000011699,ENSFDAG00000012779,ENSFDAG00000016684,ENSFDAG00000016710,ENSFDAG00000017230,ENSFDAG00000017614,ENSFDAG00000017855,ENSFDAG00000017911,ENSFDAG00000018113,…	Primed-enhancers_Liver_11446,Primed-enhancers_Liver_190,Primed-enhancers_Liver_199,Primed-enhancers_Liver_20737,Primed-enhancers_Liver_218,Primed-enhancers_Liver_21917,Primed-enhancers_Liver_23645,Primed-enhancers_Liver_23646,Primed-enhancers_Liver_24601,Primed-enhancers_Liver_24995,Primed-enhancers_Liver_25243,Primed-enhancers_Liver_30110,Primed-enhancers_Liver_30127,Primed-enhancers_Liver_30128…
GO:0048041	focal adhesion assembly	2.26417	39	17.2248	0.000418	1.98287	19	9.58207	0.0317	Clasp1,Cttn,Dlc1,Efna5,Itga2,Nrp1,Pdpk1,Peak1,Pten,Ptk2,Ptpra,Ptprk,Rhod,Rock1,Smad3,Sorbs1,Thy1,Vegfa,Whamm	ENSFDAG00000000042,ENSFDAG00000002748,ENSFDAG00000004696,ENSFDAG00000006304,ENSFDAG00000007035,ENSFDAG00000008883,ENSFDAG00000010167,ENSFDAG00000011943,ENSFDAG00000012484,ENSFDAG00000012890,ENSFDAG00000012942,ENSFDAG00000013054,ENSFDAG00000013386,ENSFDAG00000013772,ENSFDAG00000014357,ENSFDAG00000016677,ENSFDAG00000016928,ENSFDAG00000016945,ENSFDAG00000018081	Primed-enhancers_Liver_20904,Primed-enhancers_Liver_26335,Primed-enhancers_Liver_2809,Primed-enhancers_Liver_31319,Primed-enhancers_Liver_32246,Primed-enhancers_Liver_32685,Primed-enhancers_Liver_33969,Primed-enhancers_Liver_33980,Primed-enhancers_Liver_33981,Primed-enhancers_Liver_33986,Primed-enhancers_Liver_36683,Primed-enhancers_Liver_37845,Primed-enhancers_Liver_37854,Primed-enhancers_Liver_…
GO:0030855	epithelial cell differentiation	1.45723	153	104.994	0.000454	1.71951	80	46.525	8.84e-05	Abl2,Add1,Afdn,Ar,Basp1,Bmp2,Bmp4,Ccnd1,Cdh2,Clcn2,Ctnnb1,Cux1,Dab2,Dicer1,Dlg5,Dll1,Dlx3,Dlx5,Dlx6,Ehf,Elf5,Enam,Ercc3,Fam20c,Fat4,Fgf10,Fgfr2,Fndc3b,Foxb1,Foxp1,Gata4,Gli2,Ifng,Ift20,Igf1,Insc,Kcnma1,Klf4,Klf7,Lats1,Maf,Neurod1,Nfib,Nr5a1,Nrg1,Onecut1,Ophn1,Pax8,Pcdh15,Pdx1,Pelo,Plcb1,Pparg,Ppp3ca,Prkch,Prlr,Rfx3,Rock1,Rock2,Six2,Smad3,Sox9,Spry2,Srsf6,St14,Tgfb1,Tgfb2,Thrb,Tmem38b,Ttc8,Ugcg,Vd…	ENSFDAG00000000860,ENSFDAG00000001288,ENSFDAG00000002076,ENSFDAG00000002748,ENSFDAG00000003152,ENSFDAG00000003568,ENSFDAG00000004569,ENSFDAG00000004743,ENSFDAG00000005671,ENSFDAG00000005890,ENSFDAG00000006090,ENSFDAG00000006503,ENSFDAG00000006573,ENSFDAG00000007110,ENSFDAG00000007236,ENSFDAG00000007436,ENSFDAG00000008068,ENSFDAG00000008083,ENSFDAG00000008207,ENSFDAG00000008214,ENSFDAG00000008404,…	Primed-enhancers_Liver_12159,Primed-enhancers_Liver_12161,Primed-enhancers_Liver_12443,Primed-enhancers_Liver_12958,Primed-enhancers_Liver_13448,Primed-enhancers_Liver_13470,Primed-enhancers_Liver_1400,Primed-enhancers_Liver_1404,Primed-enhancers_Liver_1407,Primed-enhancers_Liver_14369,Primed-enhancers_Liver_15749,Primed-enhancers_Liver_16024,Primed-enhancers_Liver_16027,Primed-enhancers_Liver_16…
GO:1902992	negative regulation of amyloid precursor protein catabolic process	3.7811	17	4.49604	0.000454	3.19127	7	2.19349	0.0426	Bin1,Igf1,Ntrk2,Rock1,Rtn3,Sorl1,Tmed10	ENSFDAG00000008196,ENSFDAG00000009281,ENSFDAG00000010527,ENSFDAG00000012484,ENSFDAG00000014292,ENSFDAG00000015918,ENSFDAG00000016244	Primed-enhancers_Liver_16453,Primed-enhancers_Liver_19238,Primed-enhancers_Liver_33969,Primed-enhancers_Liver_33980,Primed-enhancers_Liver_33981,Primed-enhancers_Liver_33986,Primed-enhancers_Liver_34488,Primed-enhancers_Liver_36791,Primed-enhancers_Liver_36886,Primed-enhancers_Liver_36887,Primed-enhancers_Liver_72244,Primed-enhancers_Liver_72263,Primed-enhancers_Liver_72277,Primed-enhancers_Liver…
GO:0060393	regulation of pathway-restricted SMAD protein phosphorylation	2.40936	34	14.1116	0.00046	2.37781	14	5.88778	0.0228	Acvr1,Acvr2a,Bmp2,Bmp3,Bmp4,Dab2,Gdf10,Inhba,Inhbb,Pparg,Smad7,Tgfb1,Tgfb2,Tgfb3	ENSFDAG00000000530,ENSFDAG00000000810,ENSFDAG00000001117,ENSFDAG00000004743,ENSFDAG00000005173,ENSFDAG00000007195,ENSFDAG00000008083,ENSFDAG00000009044,ENSFDAG00000010372,ENSFDAG00000011655,ENSFDAG00000012435,ENSFDAG00000017432,ENSFDAG00000017680,ENSFDAG00000021196	Primed-enhancers_Liver_16500,Primed-enhancers_Liver_17763,Primed-enhancers_Liver_17781,Primed-enhancers_Liver_17791,Primed-enhancers_Liver_17804,Primed-enhancers_Liver_17806,Primed-enhancers_Liver_22137,Primed-enhancers_Liver_22351,Primed-enhancers_Liver_22352,Primed-enhancers_Liver_24601,Primed-enhancers_Liver_2852,Primed-enhancers_Liver_36159,Primed-enhancers_Liver_36179,Primed-enhancers_Liver_…
GO:0060389	pathway-restricted SMAD protein phosphorylation	2.3552	35	14.8607	0.00049	2.36237	15	6.34956	0.0186	Acvr1,Acvr2a,Bmp2,Bmp3,Bmp4,Dab2,Gdf10,Inhba,Inhbb,Pparg,Smad7,Tgfb1,Tgfb2,Tgfb3,Usp15	ENSFDAG00000000530,ENSFDAG00000000810,ENSFDAG00000001117,ENSFDAG00000004743,ENSFDAG00000005173,ENSFDAG00000007195,ENSFDAG00000008083,ENSFDAG00000009044,ENSFDAG00000010372,ENSFDAG00000011474,ENSFDAG00000011655,ENSFDAG00000012435,ENSFDAG00000017432,ENSFDAG00000017680,ENSFDAG00000021196	Primed-enhancers_Liver_16500,Primed-enhancers_Liver_17763,Primed-enhancers_Liver_17781,Primed-enhancers_Liver_17791,Primed-enhancers_Liver_17804,Primed-enhancers_Liver_17806,Primed-enhancers_Liver_22137,Primed-enhancers_Liver_22351,Primed-enhancers_Liver_22352,Primed-enhancers_Liver_24601,Primed-enhancers_Liver_2852,Primed-enhancers_Liver_36159,Primed-enhancers_Liver_36179,Primed-enhancers_Liver_…
GO:0070848	response to growth factor	1.39972	183	130.74	0.000497	1.71508	99	57.7233	1e-05	Actr3,Acvr1,Acvr1c,Acvr2a,Angpt1,Apaf1,Bcar1,Bmp2,Bmp4,Cask,Cd44,Cd59b,Cdkn2b,Chrd,Crb2,Crebbp,Crim1,Ctdspl2,Ctnnb1,Dab2,Dab2ip,Dll1,Dlx1,Dlx5,Fam20c,Fermt1,Fgf10,Fgfr1,Gab1,Garem1,Gata4,Got1,Gpc3,Hhip,Hipk2,Igf1r,Itga3,Klf4,Lats1,Magi2,Map2k5,Myof,Npnt,Nptn,Nrep,Nrp1,Ntrk2,Onecut1,Onecut2,Pax9,Pelo,Pparg,Ppargc1a,Ppm1a,Prkce,Prkd2,Ptk2,Rap1a,Rasl11b,Rnf165,Robo1,Rock1,Rock2,Runx1,Sap30,Sema6a,Sh…	ENSFDAG00000000501,ENSFDAG00000000810,ENSFDAG00000001117,ENSFDAG00000002076,ENSFDAG00000002080,ENSFDAG00000002280,ENSFDAG00000002748,ENSFDAG00000002894,ENSFDAG00000003167,ENSFDAG00000003278,ENSFDAG00000003357,ENSFDAG00000004399,ENSFDAG00000004474,ENSFDAG00000004743,ENSFDAG00000004755,ENSFDAG00000005550,ENSFDAG00000005659,ENSFDAG00000005671,ENSFDAG00000005890,ENSFDAG00000006381,ENSFDAG00000006457,…	Primed-enhancers_Liver_10617,Primed-enhancers_Liver_12365,Primed-enhancers_Liver_12381,Primed-enhancers_Liver_12439,Primed-enhancers_Liver_12443,Primed-enhancers_Liver_13448,Primed-enhancers_Liver_13470,Primed-enhancers_Liver_13667,Primed-enhancers_Liver_14369,Primed-enhancers_Liver_15279,Primed-enhancers_Liver_1564,Primed-enhancers_Liver_15680,Primed-enhancers_Liver_16024,Primed-enhancers_Liver_…
GO:0043410	positive regulation of MAPK cascade	1.43112	164	114.595	0.000507	1.69278	94	55.5298	2.87e-05	Abl2,Ackr3,Angpt1,App,Ar,Bank1,Bmp2,Bmp4,Braf,C1qtnf3,Calcr,Ccl17,Ccl19,Ccr7,Cd44,Cdh2,Cdon,Ctnnb1,Cxcl12,Dab2,Dab2ip,Drd4,Epgn,Epha4,Esr1,Fgf10,Fgfr1,Fgfr2,Fshr,Fzd8,Gab1,Garem1,Gata4,Hand2,Hipk2,Hmgb1,Hmgcr,Igf1,Igf1r,Jak2,Klb,Lep,Map2k5,Map2k6,Map3k1,Map3k13,Map3k5,Map3k7,Map4k2,Mfhas1,Mid1,Nelfe,Nod1,Npnt,Nptn,Npy,Nrg1,Nrp1,Ntrk2,Oprk1,P2ry1,Pdgfa,Pik3cg,Pik3r5,Pja2,Plcb1,Prkce,Prkd2,Psen1,Pt…	ENSFDAG00000000130,ENSFDAG00000000501,ENSFDAG00000000810,ENSFDAG00000001180,ENSFDAG00000002080,ENSFDAG00000002571,ENSFDAG00000002748,ENSFDAG00000003809,ENSFDAG00000003960,ENSFDAG00000004696,ENSFDAG00000005217,ENSFDAG00000005242,ENSFDAG00000005440,ENSFDAG00000005504,ENSFDAG00000005581,ENSFDAG00000005671,ENSFDAG00000005890,ENSFDAG00000006090,ENSFDAG00000006229,ENSFDAG00000006381,ENSFDAG00000006711,…	Primed-enhancers_Liver_11083,Primed-enhancers_Liver_11446,Primed-enhancers_Liver_12365,Primed-enhancers_Liver_12754,Primed-enhancers_Liver_13389,Primed-enhancers_Liver_13390,Primed-enhancers_Liver_13392,Primed-enhancers_Liver_14369,Primed-enhancers_Liver_14627,Primed-enhancers_Liver_16311,Primed-enhancers_Liver_16500,Primed-enhancers_Liver_1864,Primed-enhancers_Liver_1865,Primed-enhancers_Liver_1…
GO:0097191	extrinsic apoptotic signaling pathway	1.705	80	46.9209	0.000603	1.53991	40	25.9755	0.04	Acvr1,Ar,Bcl2l11,Bmp4,Ctnna1,Cttn,Dab2,Dab2ip,Ddx3x,Eya3,Eya4,Fgf10,Fgfr1,Ifng,Igf1,Inhba,Itm2b,Jak2,Map2k5,Nrg1,Nrp1,Pak2,Pik3r1,Pml,Ppp2r1a,Ppp2r1b,Pten,Rock2,Sgms1,Sh3rf1,Smad3,Stk3,Tgfb1,Tgfb2,Tlr3,Tnfaip3,Tnfrsf1b,Trps1,Vegfa,Wwox	ENSFDAG00000001511,ENSFDAG00000002080,ENSFDAG00000002748,ENSFDAG00000004696,ENSFDAG00000005748,ENSFDAG00000007195,ENSFDAG00000007598,ENSFDAG00000008083,ENSFDAG00000008095,ENSFDAG00000009028,ENSFDAG00000009044,ENSFDAG00000009107,ENSFDAG00000009437,ENSFDAG00000009628,ENSFDAG00000010085,ENSFDAG00000010372,ENSFDAG00000010527,ENSFDAG00000010757,ENSFDAG00000010876,ENSFDAG00000010878,ENSFDAG00000010961,…	Primed-enhancers_Liver_14369,Primed-enhancers_Liver_17763,Primed-enhancers_Liver_17781,Primed-enhancers_Liver_17791,Primed-enhancers_Liver_17804,Primed-enhancers_Liver_17806,Primed-enhancers_Liver_20301,Primed-enhancers_Liver_20334,Primed-enhancers_Liver_20342,Primed-enhancers_Liver_20961,Primed-enhancers_Liver_20962,Primed-enhancers_Liver_20965,Primed-enhancers_Liver_20966,Primed-enhancers_Liver…
GO:1902959	regulation of aspartic-type endopeptidase activity involved in amyloid precursor protein catabolic process	4.0681	15	3.68722	0.000609	5.19721	6	1.15447	0.00774	App,Bin1,Epha4,Rock2,Sorl1,Tmed10	ENSFDAG00000007737,ENSFDAG00000008196,ENSFDAG00000009281,ENSFDAG00000014292,ENSFDAG00000018450,ENSFDAG00000018891	Primed-enhancers_Liver_14369,Primed-enhancers_Liver_16453,Primed-enhancers_Liver_1864,Primed-enhancers_Liver_1865,Primed-enhancers_Liver_1873,Primed-enhancers_Liver_30110,Primed-enhancers_Liver_30127,Primed-enhancers_Liver_30128,Primed-enhancers_Liver_34488,Primed-enhancers_Liver_72244,Primed-enhancers_Liver_72263,Primed-enhancers_Liver_72277,Primed-enhancers_Liver_72279,Primed-enhancers_Liver_72…
GO:0043393	regulation of protein binding	1.71766	77	44.8284	0.00072	1.83385	47	25.6291	0.00118	Abl2,Ace,Actr3,Add1,Amfr,Angpt1,Aplp2,App,Atp2a2,Blk,Bmp2,Bmp4,Cblb,Cdon,Crtac1,Csf3,Cycs,Dab2,Dact1,Disc1,Dtnbp1,Eif2ak3,Epb41,Hipk2,Ide,Mapre3,Mark3,Myc,Nphp3,Pex14,Plcl1,Plcl2,Ppp2ca,Ppp2ca,Psen1,Psme3ip1,Ralb,Ripk2,Rock1,Snapin,Sorl1,Sppl3,Stk3,Tnfsf11,Ubash3b,Wfikkn2,Wnt5a	ENSFDAG00000000501,ENSFDAG00000000589,ENSFDAG00000003407,ENSFDAG00000004755,ENSFDAG00000004839,ENSFDAG00000005217,ENSFDAG00000005504,ENSFDAG00000005827,ENSFDAG00000005890,ENSFDAG00000005951,ENSFDAG00000006183,ENSFDAG00000006826,ENSFDAG00000007610,ENSFDAG00000008068,ENSFDAG00000008214,ENSFDAG00000008393,ENSFDAG00000008461,ENSFDAG00000008493,ENSFDAG00000008902,ENSFDAG00000009044,ENSFDAG00000009629,…	Primed-enhancers_Liver_10472,Primed-enhancers_Liver_1075,Primed-enhancers_Liver_1077,Primed-enhancers_Liver_1078,Primed-enhancers_Liver_12365,Primed-enhancers_Liver_12381,Primed-enhancers_Liver_12720,Primed-enhancers_Liver_13060,Primed-enhancers_Liver_15615,Primed-enhancers_Liver_16311,Primed-enhancers_Liver_17293,Primed-enhancers_Liver_17295,Primed-enhancers_Liver_17299,Primed-enhancers_Liver_17…
GO:0071363	cellular response to growth factor stimulus	1.39816	176	125.88	0.00073	1.70371	95	55.7607	1.95e-05	Actr3,Acvr1,Acvr1c,Acvr2a,Angpt1,Apaf1,Bcar1,Bmp2,Bmp4,Cask,Cd44,Cd59b,Cdkn2b,Chrd,Crb2,Crebbp,Crim1,Ctdspl2,Ctnnb1,Dab2,Dab2ip,Dll1,Dlx1,Dlx5,Fam20c,Fermt1,Fgf10,Fgfr1,Gab1,Garem1,Gata4,Got1,Gpc3,Hhip,Hipk2,Igf1r,Itga3,Klf4,Lats1,Magi2,Map2k5,Myof,Npnt,Nptn,Nrep,Nrp1,Ntrk2,Onecut1,Onecut2,Pax9,Pelo,Pparg,Ppargc1a,Ppm1a,Prkce,Prkd2,Ptk2,Rap1a,Rasl11b,Rnf165,Robo1,Runx1,Sap30,Sema6a,Shisa2,Sin3a,S…	ENSFDAG00000000501,ENSFDAG00000000810,ENSFDAG00000001117,ENSFDAG00000002076,ENSFDAG00000002080,ENSFDAG00000002280,ENSFDAG00000002748,ENSFDAG00000002894,ENSFDAG00000003167,ENSFDAG00000003278,ENSFDAG00000003357,ENSFDAG00000004399,ENSFDAG00000004474,ENSFDAG00000004743,ENSFDAG00000004755,ENSFDAG00000005550,ENSFDAG00000005659,ENSFDAG00000005671,ENSFDAG00000005890,ENSFDAG00000006381,ENSFDAG00000006457,…	Primed-enhancers_Liver_10617,Primed-enhancers_Liver_12365,Primed-enhancers_Liver_12381,Primed-enhancers_Liver_12439,Primed-enhancers_Liver_12443,Primed-enhancers_Liver_13448,Primed-enhancers_Liver_13470,Primed-enhancers_Liver_13667,Primed-enhancers_Liver_15279,Primed-enhancers_Liver_1564,Primed-enhancers_Liver_15680,Primed-enhancers_Liver_16024,Primed-enhancers_Liver_16027,Primed-enhancers_Liver_…
GO:0071495	cellular response to endogenous stimulus	1.32317	237	179.116	0.000754	1.44924	130	89.702	0.000386	Aanat,Acaca,Actr3,Acvr1,Acvr2a,Adcy8,Ahr,Ano1,Apaf1,App,Aqp1,Ar,Arhgef2,Bcar1,Bmp2,Bmp4,Cd44,Cdkn2b,Cftr,Col1a1,Cpeb3,Cpeb4,Crebbp,Ctnna1,Ctnnb1,Cyp11a1,Dab2,Dab2ip,Dlx1,Dlx5,Dnmt3a,Efna5,Epha4,Eprs,Esr1,Fermt1,Fshr,Gabpa,Garem1,Gata4,Ghsr,Gja6,Gm45837,Got1,Grb14,Grin2a,Hdac8,Hdac9,Hipk2,Hnf1a,Igf1,Igf1r,Inhba,Irs1,Itga3,Itpr2,Jak2,Lats1,Lep,Lhcgr,Lmbrd1,Magi2,Nck1,Ncoa1,Ncoa2,Neurl1a,Nod1,Npnt,N…	ENSFDAG00000000501,ENSFDAG00000000810,ENSFDAG00000001117,ENSFDAG00000002280,ENSFDAG00000002894,ENSFDAG00000003278,ENSFDAG00000003809,ENSFDAG00000004027,ENSFDAG00000004129,ENSFDAG00000004696,ENSFDAG00000004743,ENSFDAG00000004755,ENSFDAG00000005130,ENSFDAG00000005217,ENSFDAG00000005223,ENSFDAG00000005504,ENSFDAG00000005550,ENSFDAG00000005659,ENSFDAG00000005671,ENSFDAG00000005741,ENSFDAG00000006071,…	Primed-enhancers_Liver_11968,Primed-enhancers_Liver_11969,Primed-enhancers_Liver_12365,Primed-enhancers_Liver_12381,Primed-enhancers_Liver_12421,Primed-enhancers_Liver_12439,Primed-enhancers_Liver_12443,Primed-enhancers_Liver_13448,Primed-enhancers_Liver_13470,Primed-enhancers_Liver_13667,Primed-enhancers_Liver_14072,Primed-enhancers_Liver_14098,Primed-enhancers_Liver_14102,Primed-enhancers_Liver…
GO:0043087	regulation of GTPase activity	1.51635	119	78.4779	0.000754	1.80024	69	38.3283	9.01e-05	Afdn,Arap1,Arhgap29,Arhgap35,Asap1,Asap2,Bin1,Cblb,Ccl17,Ccl19,Ccr7,Cdkl5,Chn1,Chn2,Dab2ip,Dennd1a,Dennd1b,Dgki,Dock10,Dock11,Dock7,Efna5,Eif5,Epha4,Ephb3,Gapvd1,Garnl3,Gnao1,Iqsec3,Mapre2,Mex3b,Mmut,Net1,Ntrk2,Plxna1,Plxnb3,Prex1,Rab3gap1,Rabgap1l,Ralgapa2,Ralgps2,Rap1a,Rap1gap2,Rasgrf1,Rdx,Rgs4,Rgs6,Ric1,Rictor,Sbf2,Sipa1l1,Sipa1l2,Snx13,Snx18,Spry2,Srgap2,Syngap1,Tbc1d1,Tbc1d17,Tbc1d22a,Tbc1d3…	ENSFDAG00000000095,ENSFDAG00000000786,ENSFDAG00000001288,ENSFDAG00000001552,ENSFDAG00000002693,ENSFDAG00000002934,ENSFDAG00000002987,ENSFDAG00000004497,ENSFDAG00000004907,ENSFDAG00000005890,ENSFDAG00000006063,ENSFDAG00000006373,ENSFDAG00000006591,ENSFDAG00000006956,ENSFDAG00000007737,ENSFDAG00000007742,ENSFDAG00000008159,ENSFDAG00000008196,ENSFDAG00000008256,ENSFDAG00000009150,ENSFDAG00000009219,…	Primed-enhancers_Liver_11353,Primed-enhancers_Liver_12754,Primed-enhancers_Liver_14426,Primed-enhancers_Liver_14722,Primed-enhancers_Liver_14726,Primed-enhancers_Liver_14771,Primed-enhancers_Liver_16193,Primed-enhancers_Liver_16198,Primed-enhancers_Liver_16246,Primed-enhancers_Liver_16250,Primed-enhancers_Liver_16253,Primed-enhancers_Liver_16255,Primed-enhancers_Liver_16256,Primed-enhancers_Liver…
GO:0034110	regulation of homotypic cell-cell adhesion	3.04646	21	6.89324	0.000798	2.80242	11	3.92518	0.0185	Abat,Adamts18,Ank3,Blk,Cd9,Jak1,Jak2,Prkcq,Rdx,Tnfsf11,Ubash3b	ENSFDAG00000005711,ENSFDAG00000005862,ENSFDAG00000008423,ENSFDAG00000009944,ENSFDAG00000010085,ENSFDAG00000010109,ENSFDAG00000011249,ENSFDAG00000012973,ENSFDAG00000013126,ENSFDAG00000013725,ENSFDAG00000019069	Primed-enhancers_Liver_22974,Primed-enhancers_Liver_23645,Primed-enhancers_Liver_23646,Primed-enhancers_Liver_27923,Primed-enhancers_Liver_37616,Primed-enhancers_Liver_39373,Primed-enhancers_Liver_39374,Primed-enhancers_Liver_52032,Primed-enhancers_Liver_62714,Primed-enhancers_Liver_70557,Primed-enhancers_Liver_70565,Primed-enhancers_Liver_72244,Primed-enhancers_Liver_72263,Primed-enhancers_Liver…
GO:1904179	positive regulation of adipose tissue development	5.31121	11	2.07109	0.000807	5.41376	5	0.923573	0.0154	Ncoa1,Ncoa2,Pparg,Sh3pxd2b,Sorl1	ENSFDAG00000004743,ENSFDAG00000011476,ENSFDAG00000014292,ENSFDAG00000017412,ENSFDAG00000019085	Primed-enhancers_Liver_14098,Primed-enhancers_Liver_14102,Primed-enhancers_Liver_190,Primed-enhancers_Liver_62303,Primed-enhancers_Liver_72244,Primed-enhancers_Liver_72263,Primed-enhancers_Liver_72277,Primed-enhancers_Liver_72279,Primed-enhancers_Liver_72280,Primed-enhancers_Liver_72294,Primed-enhancers_Liver_9990
GO:0002062	chondrocyte differentiation	1.81909	62	34.0829	0.00084	2.14222	23	10.7365	0.00713	Bmp2,Bmp4,Creb3l2,Ctnnb1,Fgfr1,Gli2,Gli3,Lnpk,Maf,Mkx,Nfib,Rarb,Runx1,Six2,Smad3,Smad7,Sox5,Sox6,Sox9,Tgfb1,Thrb,Trps1,Zbtb16	ENSFDAG00000002080,ENSFDAG00000004569,ENSFDAG00000006096,ENSFDAG00000008006,ENSFDAG00000008083,ENSFDAG00000009044,ENSFDAG00000009384,ENSFDAG00000010014,ENSFDAG00000011655,ENSFDAG00000012035,ENSFDAG00000012104,ENSFDAG00000012167,ENSFDAG00000012280,ENSFDAG00000012415,ENSFDAG00000012545,ENSFDAG00000012886,ENSFDAG00000014357,ENSFDAG00000014810,ENSFDAG00000015084,ENSFDAG00000016628,ENSFDAG00000017680,…	Primed-enhancers_Liver_13448,Primed-enhancers_Liver_13470,Primed-enhancers_Liver_17758,Primed-enhancers_Liver_17763,Primed-enhancers_Liver_21294,Primed-enhancers_Liver_21297,Primed-enhancers_Liver_21300,Primed-enhancers_Liver_21304,Primed-enhancers_Liver_21312,Primed-enhancers_Liver_21317,Primed-enhancers_Liver_21346,Primed-enhancers_Liver_21350,Primed-enhancers_Liver_21381,Primed-enhancers_Liver…
GO:0007264	small GTPase mediated signal transduction	1.48105	130	87.7758	0.000889	1.58451	75	47.3331	0.00138	Abca1,Abl2,Abra,Arfgef2,Arhgap26,Arhgap28,Arhgap30,Arhgap35,Arhgef11,Arhgef2,Arhgef28,Auts2,Auts2,Cbl,Ccdc88c,Cdc42bpa,Cdh2,Cdon,Chn1,Cul3,Dab2ip,Dennd1a,Dennd4a,Dgki,Dlc1,Dock10,Dock11,Dock2,Dock4,Dock7,Eps8,Farp2,Fgf10,Garnl3,Gna12,Hacd3,Igf1,Iqsec3,Itga3,Itpkb,Mapkap1,Mapre2,Net1,Nradd,Nrg1,Nrp1,Ntn1,Ophn1,Phactr4,Pik3cg,Prag1,Psd,Psd3,Ralb,Ralgapa2,Ralgps2,Rap1a,Rap1gap2,Rasgrf1,Rhobtb1,Rhod,…	ENSFDAG00000001218,ENSFDAG00000002280,ENSFDAG00000002693,ENSFDAG00000002987,ENSFDAG00000003292,ENSFDAG00000003325,ENSFDAG00000004026,ENSFDAG00000004497,ENSFDAG00000004907,ENSFDAG00000005299,ENSFDAG00000005706,ENSFDAG00000005790,ENSFDAG00000006090,ENSFDAG00000006377,ENSFDAG00000007589,ENSFDAG00000007610,ENSFDAG00000007990,ENSFDAG00000008214,ENSFDAG00000008256,ENSFDAG00000008332,ENSFDAG00000008393,…	Primed-enhancers_Liver_10091,Primed-enhancers_Liver_11051,Primed-enhancers_Liver_11069,Primed-enhancers_Liver_11083,Primed-enhancers_Liver_11353,Primed-enhancers_Liver_12439,Primed-enhancers_Liver_12443,Primed-enhancers_Liver_14369,Primed-enhancers_Liver_14627,Primed-enhancers_Liver_14921,Primed-enhancers_Liver_14954,Primed-enhancers_Liver_16193,Primed-enhancers_Liver_16198,Primed-enhancers_Liver…
GO:0051099	positive regulation of binding	1.71332	74	43.1909	0.000889	2.1094	47	22.2812	6.24e-05	Abl2,Ace,Actr3,Add1,Amfr,App,Blk,Bmp2,Bmp4,Csf3,Ctnnb1,Dact1,Eif2ak3,Eif3e,Epb41,Epha4,Hand2,Hipk2,Hmbox1,Hmbox1,Hmgb1,Ide,Ifng,Igf1,Isl1,Itga2,Jak2,Klf4,Mapre3,Mark3,Myc,Neurod1,Nphp3,Pdx1,Plcl1,Plcl2,Pparg,Ppp2ca,Ppp2ca,Psen1,Ralb,Ripk2,Sppl3,Stk3,Tgfb1,Tgfb2,Wnt5a	ENSFDAG00000000501,ENSFDAG00000003190,ENSFDAG00000003407,ENSFDAG00000004743,ENSFDAG00000004755,ENSFDAG00000004839,ENSFDAG00000005217,ENSFDAG00000005504,ENSFDAG00000005890,ENSFDAG00000005951,ENSFDAG00000006049,ENSFDAG00000006183,ENSFDAG00000007035,ENSFDAG00000007737,ENSFDAG00000008068,ENSFDAG00000008083,ENSFDAG00000008214,ENSFDAG00000008393,ENSFDAG00000008461,ENSFDAG00000008493,ENSFDAG00000009044,…	Primed-enhancers_Liver_10472,Primed-enhancers_Liver_1075,Primed-enhancers_Liver_1077,Primed-enhancers_Liver_1078,Primed-enhancers_Liver_12720,Primed-enhancers_Liver_13060,Primed-enhancers_Liver_15615,Primed-enhancers_Liver_16311,Primed-enhancers_Liver_17293,Primed-enhancers_Liver_17295,Primed-enhancers_Liver_17299,Primed-enhancers_Liver_17305,Primed-enhancers_Liver_1864,Primed-enhancers_Liver_186…
GO:0030097	hemopoiesis	1.43091	146	102.033	0.00127	1.37722	76	55.1835	0.0299	Acvr2a,Adar,Ahr,Angpt1,Ap3b1,Arid1a,Arid1b,Arid2,Asxl1,Asxl2,Atp11c,Bmp4,Braf,Ccl19,Ccr7,Cd44,Crip2,Csf3,Ctnnb1,Cyp26b1,Dicer1,Dlk1,Dll1,Drosha,Epas1,Ercc1,Ets1,Foxp1,Fshr,Gabpa,Gli3,Gpr68,Hmgb1,Hspa9,Ifng,Inhba,Itpkb,Jak1,Jak2,Kat6a,Klf4,Lep,Lyl1,Meis1,Myc,Pik3r1,Ppargc1b,Ppp3ca,Ptn,Rbfox2,Ripk2,Rorc,Runx1,Sh3rf1,Smad7,Smarca2,Smarce1,Sox6,Sp3,Sptb,Stk3,Tesc,Tgfb1,Tgfb2,Tiparp,Tmem178,Tnfsf11,Tn…	ENSFDAG00000000334,ENSFDAG00000001117,ENSFDAG00000001807,ENSFDAG00000004839,ENSFDAG00000005504,ENSFDAG00000005565,ENSFDAG00000005632,ENSFDAG00000005741,ENSFDAG00000006204,ENSFDAG00000006438,ENSFDAG00000006826,ENSFDAG00000007522,ENSFDAG00000008006,ENSFDAG00000008083,ENSFDAG00000008095,ENSFDAG00000008332,ENSFDAG00000008341,ENSFDAG00000008670,ENSFDAG00000008719,ENSFDAG00000008747,ENSFDAG00000009044,…	Primed-enhancers_Liver_12720,Primed-enhancers_Liver_12754,Primed-enhancers_Liver_13710,Primed-enhancers_Liver_13720,Primed-enhancers_Liver_13721,Primed-enhancers_Liver_14034,Primed-enhancers_Liver_14771,Primed-enhancers_Liver_15900,Primed-enhancers_Liver_15903,Primed-enhancers_Liver_16024,Primed-enhancers_Liver_16027,Primed-enhancers_Liver_16028,Primed-enhancers_Liver_16029,Primed-enhancers_Liver…
GO:2001236	regulation of extrinsic apoptotic signaling pathway	1.75054	66	37.7026	0.00135	1.64182	29	17.6633	0.0479	Acvr1,Ar,Bmp4,Ctnna1,Cttn,Dab2,Ddx3x,Eya3,Eya4,Fgf10,Fgfr1,Igf1,Inhba,Map2k5,Nrg1,Nrp1,Pak2,Pml,Ppp2r1a,Ppp2r1b,Pten,Sgms1,Sh3rf1,Stk3,Tgfb2,Tnfaip3,Trps1,Vegfa,Wwox	ENSFDAG00000001511,ENSFDAG00000002080,ENSFDAG00000002748,ENSFDAG00000004696,ENSFDAG00000007195,ENSFDAG00000009028,ENSFDAG00000009044,ENSFDAG00000009107,ENSFDAG00000009628,ENSFDAG00000010372,ENSFDAG00000010527,ENSFDAG00000010757,ENSFDAG00000010876,ENSFDAG00000010961,ENSFDAG00000011290,ENSFDAG00000011500,ENSFDAG00000011943,ENSFDAG00000012001,ENSFDAG00000012104,ENSFDAG00000012435,ENSFDAG00000012550,…	Primed-enhancers_Liver_17763,Primed-enhancers_Liver_17781,Primed-enhancers_Liver_17791,Primed-enhancers_Liver_17804,Primed-enhancers_Liver_17806,Primed-enhancers_Liver_20961,Primed-enhancers_Liver_20962,Primed-enhancers_Liver_20965,Primed-enhancers_Liver_20966,Primed-enhancers_Liver_20967,Primed-enhancers_Liver_22351,Primed-enhancers_Liver_22352,Primed-enhancers_Liver_24601,Primed-enhancers_Liver…
GO:2000045	regulation of G1/S transition of mitotic cell cycle	1.77621	62	34.9058	0.00142	1.76448	33	18.7023	0.0149	Acvr1,Arid1a,Arid1b,Arid2,Ccnd1,Ccnh,Cdkn2b,Cpsf3,Crebbp,Ctdspl,Dact1,Dcun1d3,Ddx3x,Dlg1,Dpf3,Fgf10,Fhl1,Inhba,Jade1,Klf4,Mnat1,Muc1,Plcb1,Pml,Ppp2ca,Ppp2ca,Ppp2r5c,Pten,Rdx,Rrm1,Smarca2,Smarce1,Ube2e2	ENSFDAG00000000334,ENSFDAG00000003637,ENSFDAG00000004395,ENSFDAG00000004696,ENSFDAG00000005436,ENSFDAG00000005951,ENSFDAG00000006183,ENSFDAG00000006317,ENSFDAG00000006438,ENSFDAG00000007182,ENSFDAG00000007195,ENSFDAG00000007707,ENSFDAG00000007850,ENSFDAG00000008341,ENSFDAG00000010071,ENSFDAG00000010481,ENSFDAG00000010502,ENSFDAG00000010598,ENSFDAG00000010886,ENSFDAG00000010914,ENSFDAG00000011383,…	Primed-enhancers_Liver_10472,Primed-enhancers_Liver_12754,Primed-enhancers_Liver_14426,Primed-enhancers_Liver_15615,Primed-enhancers_Liver_15721,Primed-enhancers_Liver_16253,Primed-enhancers_Liver_16255,Primed-enhancers_Liver_16256,Primed-enhancers_Liver_16290,Primed-enhancers_Liver_16297,Primed-enhancers_Liver_17207,Primed-enhancers_Liver_17763,Primed-enhancers_Liver_17781,Primed-enhancers_Liver…
GO:0032092	positive regulation of protein binding	1.95142	46	23.5725	0.00164	2.42536	28	11.5447	0.000354	Abl2,Ace,Actr3,Add1,Amfr,App,Blk,Bmp2,Bmp4,Csf3,Dact1,Eif2ak3,Epb41,Hipk2,Ide,Mapre3,Mark3,Nphp3,Plcl1,Plcl2,Ppp2ca,Ppp2ca,Psen1,Ralb,Ripk2,Sppl3,Stk3,Wnt5a	ENSFDAG00000000501,ENSFDAG00000003407,ENSFDAG00000004755,ENSFDAG00000005217,ENSFDAG00000005504,ENSFDAG00000005890,ENSFDAG00000005951,ENSFDAG00000006183,ENSFDAG00000008068,ENSFDAG00000008214,ENSFDAG00000008393,ENSFDAG00000008461,ENSFDAG00000008493,ENSFDAG00000009044,ENSFDAG00000009629,ENSFDAG00000010481,ENSFDAG00000011655,ENSFDAG00000012451,ENSFDAG00000014285,ENSFDAG00000014315,ENSFDAG00000017748,…	Primed-enhancers_Liver_10472,Primed-enhancers_Liver_1075,Primed-enhancers_Liver_1077,Primed-enhancers_Liver_1078,Primed-enhancers_Liver_12720,Primed-enhancers_Liver_13060,Primed-enhancers_Liver_15615,Primed-enhancers_Liver_16311,Primed-enhancers_Liver_17293,Primed-enhancers_Liver_17295,Primed-enhancers_Liver_17299,Primed-enhancers_Liver_17305,Primed-enhancers_Liver_21917,Primed-enhancers_Liver_22…
GO:2001239	regulation of extrinsic apoptotic signaling pathway in absence of ligand	2.40234	29	12.0716	0.00164	2.47486	12	4.84876	0.0295	Ctnna1,Eya3,Eya4,Fgf10,Fgfr1,Inhba,Map2k5,Nrg1,Ppp2r1a,Ppp2r1b,Tgfb2,Wwox	ENSFDAG00000001511,ENSFDAG00000002080,ENSFDAG00000009107,ENSFDAG00000009628,ENSFDAG00000010757,ENSFDAG00000010876,ENSFDAG00000011290,ENSFDAG00000012001,ENSFDAG00000012435,ENSFDAG00000017616,ENSFDAG00000019969,ENSFDAG00000021196	Primed-enhancers_Liver_17763,Primed-enhancers_Liver_17781,Primed-enhancers_Liver_17791,Primed-enhancers_Liver_17804,Primed-enhancers_Liver_17806,Primed-enhancers_Liver_20961,Primed-enhancers_Liver_20962,Primed-enhancers_Liver_20965,Primed-enhancers_Liver_20966,Primed-enhancers_Liver_20967,Primed-enhancers_Liver_34608,Primed-enhancers_Liver_473,Primed-enhancers_Liver_5068,Primed-enhancers_Liver_50…
GO:0042476	odontogenesis	1.8868	52	27.5599	0.00164	2.40135	28	11.6601	0.000417	Acvr2a,Bcl2l11,Bcor,Bmp2,Bmp4,Cftr,Ctnnb1,Dicer1,Dll1,Dlx1,Dlx3,Enam,Fam20c,Fgf10,Fgfr2,Gli2,Gli3,Hand2,Inhba,Lamb1,Nkx2-3,Pax9,Phex,Rspo2,Tcirg1,Tgfb1,Wnt10a,Wnt6	ENSFDAG00000001117,ENSFDAG00000004447,ENSFDAG00000005748,ENSFDAG00000006573,ENSFDAG00000007616,ENSFDAG00000008083,ENSFDAG00000009044,ENSFDAG00000009384,ENSFDAG00000009453,ENSFDAG00000010263,ENSFDAG00000010907,ENSFDAG00000011655,ENSFDAG00000012019,ENSFDAG00000012545,ENSFDAG00000012995,ENSFDAG00000013279,ENSFDAG00000014165,ENSFDAG00000015976,ENSFDAG00000017546,ENSFDAG00000017616,ENSFDAG00000017927,…	Primed-enhancers_Liver_12443,Primed-enhancers_Liver_14573,Primed-enhancers_Liver_14580,Primed-enhancers_Liver_14581,Primed-enhancers_Liver_15279,Primed-enhancers_Liver_17039,Primed-enhancers_Liver_1756,Primed-enhancers_Liver_17758,Primed-enhancers_Liver_17763,Primed-enhancers_Liver_17781,Primed-enhancers_Liver_17791,Primed-enhancers_Liver_17804,Primed-enhancers_Liver_17806,Primed-enhancers_Liver_…
GO:0010463	mesenchymal cell proliferation	1.92582	48	24.9244	0.00164	3.68938	23	6.23412	3.01e-06	Bmp2,Bmp4,Chrd,Ctnnb1,Fat4,Fgfr1,Fgfr2,Foxp1,Gpc3,Hand2,Hmgb1,Irs1,Lrp5,Myc,Nfib,Pdgfa,Ptn,Six2,Sox9,Tbx18,Vegfa,Wnt2,Wnt5a	ENSFDAG00000002080,ENSFDAG00000002748,ENSFDAG00000004569,ENSFDAG00000004839,ENSFDAG00000005565,ENSFDAG00000005890,ENSFDAG00000007215,ENSFDAG00000008466,ENSFDAG00000009044,ENSFDAG00000009317,ENSFDAG00000009384,ENSFDAG00000009453,ENSFDAG00000011119,ENSFDAG00000011655,ENSFDAG00000012167,ENSFDAG00000012332,ENSFDAG00000012354,ENSFDAG00000012886,ENSFDAG00000014474,ENSFDAG00000018458,ENSFDAG00000018637,…	Primed-enhancers_Liver_13448,Primed-enhancers_Liver_13470,Primed-enhancers_Liver_190,Primed-enhancers_Liver_199,Primed-enhancers_Liver_2001,Primed-enhancers_Liver_2013,Primed-enhancers_Liver_218,Primed-enhancers_Liver_21917,Primed-enhancers_Liver_22351,Primed-enhancers_Liver_22352,Primed-enhancers_Liver_26005,Primed-enhancers_Liver_28400,Primed-enhancers_Liver_32246,Primed-enhancers_Liver_33516,P…
GO:0002068	glandular epithelial cell development	2.7633	22	7.9615	0.00167	2.68821	9	3.34795	0.0442	Arntl,Bmp4,Cdh2,Cftr,Dll1,Pdpk1,Rarb,Rfx3,Wnt5a	ENSFDAG00000005695,ENSFDAG00000005890,ENSFDAG00000006090,ENSFDAG00000006096,ENSFDAG00000007616,ENSFDAG00000009044,ENSFDAG00000013054,ENSFDAG00000014165,ENSFDAG00000017243	Primed-enhancers_Liver_21294,Primed-enhancers_Liver_21297,Primed-enhancers_Liver_21300,Primed-enhancers_Liver_21304,Primed-enhancers_Liver_21312,Primed-enhancers_Liver_21317,Primed-enhancers_Liver_21346,Primed-enhancers_Liver_21350,Primed-enhancers_Liver_21917,Primed-enhancers_Liver_22351,Primed-enhancers_Liver_22352,Primed-enhancers_Liver_31211,Primed-enhancers_Liver_31319,Primed-enhancers_Liver…
GO:0002066	columnar/cuboidal epithelial cell development	2.43215	28	11.5125	0.00192	2.47486	12	4.84876	0.0295	Arntl,Bmp4,Cdh2,Cftr,Dicer1,Dll1,Il6st,Klf5,Pdpk1,Rarb,Rfx3,Wnt5a	ENSFDAG00000004944,ENSFDAG00000005695,ENSFDAG00000005890,ENSFDAG00000006090,ENSFDAG00000006096,ENSFDAG00000007616,ENSFDAG00000009044,ENSFDAG00000013054,ENSFDAG00000014165,ENSFDAG00000016309,ENSFDAG00000017243,ENSFDAG00000021287	Primed-enhancers_Liver_17039,Primed-enhancers_Liver_20766,Primed-enhancers_Liver_21294,Primed-enhancers_Liver_21297,Primed-enhancers_Liver_21300,Primed-enhancers_Liver_21304,Primed-enhancers_Liver_21312,Primed-enhancers_Liver_21317,Primed-enhancers_Liver_21346,Primed-enhancers_Liver_21350,Primed-enhancers_Liver_21917,Primed-enhancers_Liver_22351,Primed-enhancers_Liver_22352,Primed-enhancers_Liver…
GO:0009719	response to endogenous stimulus	1.27325	267	209.699	0.00198	1.34487	152	113.022	0.00234	Aanat,Acaca,Actr3,Acvr1,Acvr1c,Acvr2a,Adcy8,Ahr,Ano1,Apaf1,App,Aqp1,Ar,Arhgef2,Arsb,Atp2a2,Bcar1,Bmp2,Bmp4,Calcr,Capn1,Ccl19,Ccnd1,Ccr7,Cd44,Cd9,Cdkn2b,Cftr,Cntnap2,Col1a1,Cpeb3,Cpeb4,Crebbp,Cry1,Ctnna1,Ctnnb1,Cyp11a1,Dab2,Dab2ip,Dlx1,Dlx5,Dnmt3a,Efna5,Epha4,Eprs,Esr1,Fermt1,Fshr,Gabpa,Garem1,Gata4,Ghsr,Gja6,Gm45837,Got1,Grb14,Grin2a,Hdac8,Hdac9,Hipk2,Hmgb1,Hnf1a,Igf1,Igf1r,Inhba,Irs1,Itga3,Itpr2…	ENSFDAG00000000501,ENSFDAG00000000810,ENSFDAG00000001117,ENSFDAG00000002280,ENSFDAG00000002894,ENSFDAG00000003167,ENSFDAG00000003278,ENSFDAG00000003809,ENSFDAG00000004027,ENSFDAG00000004129,ENSFDAG00000004696,ENSFDAG00000004743,ENSFDAG00000004755,ENSFDAG00000005130,ENSFDAG00000005217,ENSFDAG00000005223,ENSFDAG00000005504,ENSFDAG00000005550,ENSFDAG00000005659,ENSFDAG00000005671,ENSFDAG00000005741,…	Primed-enhancers_Liver_11968,Primed-enhancers_Liver_11969,Primed-enhancers_Liver_12365,Primed-enhancers_Liver_12381,Primed-enhancers_Liver_12421,Primed-enhancers_Liver_12439,Primed-enhancers_Liver_12443,Primed-enhancers_Liver_12754,Primed-enhancers_Liver_13448,Primed-enhancers_Liver_13470,Primed-enhancers_Liver_13667,Primed-enhancers_Liver_14072,Primed-enhancers_Liver_14098,Primed-enhancers_Liver…
GO:0042982	amyloid precursor protein metabolic process	2.21192	33	14.9192	0.00198	2.25966	18	7.96581	0.0128	Aatf,Ago2,App,Bin1,Dlg1,Dyrk1a,Epha4,Ifng,Igf1,Itm2b,Ntrk2,Pawr,Psen1,Rock1,Rock2,Rtn3,Sorl1,Tmed10	ENSFDAG00000004759,ENSFDAG00000005217,ENSFDAG00000007182,ENSFDAG00000007271,ENSFDAG00000007737,ENSFDAG00000008196,ENSFDAG00000009281,ENSFDAG00000010527,ENSFDAG00000010878,ENSFDAG00000012484,ENSFDAG00000012724,ENSFDAG00000013789,ENSFDAG00000014292,ENSFDAG00000015213,ENSFDAG00000015918,ENSFDAG00000016244,ENSFDAG00000018450,ENSFDAG00000018891	Primed-enhancers_Liver_11968,Primed-enhancers_Liver_11969,Primed-enhancers_Liver_14369,Primed-enhancers_Liver_16311,Primed-enhancers_Liver_16453,Primed-enhancers_Liver_1864,Primed-enhancers_Liver_1865,Primed-enhancers_Liver_1873,Primed-enhancers_Liver_19238,Primed-enhancers_Liver_26335,Primed-enhancers_Liver_27374,Primed-enhancers_Liver_28757,Primed-enhancers_Liver_30110,Primed-enhancers_Liver_30…
GO:0045597	positive regulation of cell differentiation	1.25767	289	229.79	0.00208	1.49668	160	106.904	1.38e-05	Abi3bp,Ace,Actr3,Acvr1,Acvr2a,Adamts9,Add1,Afdn,Ap3b1,App,Ar,Arhgef2,Arid1a,Arid1b,Arid2,Arntl,Asxl2,Atp11c,Atxn1,Bcl11a,Bin1,Bmp2,Bmp4,Braf,Brinp2,Cask,Ccl19,Ccr7,Cdkl5,Cdon,Cds1,Cftr,Col1a1,Crb2,Csf3,Ctnnb1,Cux1,Cxcl12,Cyp26b1,Dab2,Dact1,Dicer1,Disc1,Dlk1,Dlx1,Dlx5,Dpf3,Efna5,Epha4,Ets1,Etv5,Fam20c,Fbxw8,Fgfr1,Fndc3b,Gdf10,Gli2,Gli3,Gpr68,Hmgb1,Hoxd3,Ifng,Igf1,Il6st,Inhba,Isl1,Islr2,Itpkb,Jak2,…	ENSFDAG00000000334,ENSFDAG00000000589,ENSFDAG00000000810,ENSFDAG00000001117,ENSFDAG00000001493,ENSFDAG00000002080,ENSFDAG00000002748,ENSFDAG00000002894,ENSFDAG00000003357,ENSFDAG00000003760,ENSFDAG00000003960,ENSFDAG00000004129,ENSFDAG00000004696,ENSFDAG00000004743,ENSFDAG00000004755,ENSFDAG00000004839,ENSFDAG00000004944,ENSFDAG00000005173,ENSFDAG00000005250,ENSFDAG00000005440,ENSFDAG00000005504,…	Primed-enhancers_Liver_11051,Primed-enhancers_Liver_11069,Primed-enhancers_Liver_11083,Primed-enhancers_Liver_11446,Primed-enhancers_Liver_12159,Primed-enhancers_Liver_12161,Primed-enhancers_Liver_12365,Primed-enhancers_Liver_12421,Primed-enhancers_Liver_12720,Primed-enhancers_Liver_12754,Primed-enhancers_Liver_13020,Primed-enhancers_Liver_13060,Primed-enhancers_Liver_13448,Primed-enhancers_Liver…
GO:0045165	cell fate commitment	1.54913	94	60.6792	0.00228	2.30373	50	21.704	3.15e-06	Acvr1,Ar,Arhgef2,Barhl2,Bmp2,Bmp4,Braf,Chrd,Ctnnb1,Dll1,Dlx1,Elf5,Epas1,Fgf10,Fgfr1,Fgfr2,Gata4,Gli3,Isl1,Lats1,Lbx1,Lmo4,Neurod1,Nrg1,Onecut1,Onecut2,Pax3,Pml,Pparg,Runx1,Sh3pxd2b,Smad1,Smad2,Sox5,Sox6,Sox9,Spry2,Tbx18,Tgfb1,Tgfb2,Tlx1,Tox,Vsx2,Wnt10a,Wnt10b,Wnt16,Wnt2,Wnt5a,Wnt6,Wnt9b	ENSFDAG00000002080,ENSFDAG00000002894,ENSFDAG00000004743,ENSFDAG00000005671,ENSFDAG00000005890,ENSFDAG00000006049,ENSFDAG00000007195,ENSFDAG00000007215,ENSFDAG00000008083,ENSFDAG00000008466,ENSFDAG00000009044,ENSFDAG00000009384,ENSFDAG00000010097,ENSFDAG00000010154,ENSFDAG00000010263,ENSFDAG00000010961,ENSFDAG00000011166,ENSFDAG00000011300,ENSFDAG00000011476,ENSFDAG00000011645,ENSFDAG00000011655,…	Primed-enhancers_Liver_12958,Primed-enhancers_Liver_13448,Primed-enhancers_Liver_13470,Primed-enhancers_Liver_16397,Primed-enhancers_Liver_1756,Primed-enhancers_Liver_17758,Primed-enhancers_Liver_17763,Primed-enhancers_Liver_1864,Primed-enhancers_Liver_1865,Primed-enhancers_Liver_1873,Primed-enhancers_Liver_20931,Primed-enhancers_Liver_20961,Primed-enhancers_Liver_20962,Primed-enhancers_Liver_209…
GO:1902991	regulation of amyloid precursor protein catabolic process	2.49482	25	10.0208	0.00228	2.38205	11	4.61786	0.0469	App,Bin1,Epha4,Ifng,Igf1,Ntrk2,Rock1,Rock2,Rtn3,Sorl1,Tmed10	ENSFDAG00000007737,ENSFDAG00000008196,ENSFDAG00000009281,ENSFDAG00000010527,ENSFDAG00000010878,ENSFDAG00000012484,ENSFDAG00000014292,ENSFDAG00000015918,ENSFDAG00000016244,ENSFDAG00000018450,ENSFDAG00000018891	Primed-enhancers_Liver_14369,Primed-enhancers_Liver_16453,Primed-enhancers_Liver_1864,Primed-enhancers_Liver_1865,Primed-enhancers_Liver_1873,Primed-enhancers_Liver_19238,Primed-enhancers_Liver_30110,Primed-enhancers_Liver_30127,Primed-enhancers_Liver_30128,Primed-enhancers_Liver_33969,Primed-enhancers_Liver_33980,Primed-enhancers_Liver_33981,Primed-enhancers_Liver_33986,Primed-enhancers_Liver_34…
GO:0007179	transforming growth factor beta receptor signaling pathway	1.67021	71	42.5097	0.0023	1.89916	41	21.5885	0.00149	Acvr1,Bmp2,Cdkn2b,Crebbp,Dab2,Dcp1a,Fermt1,Got1,Hipk2,Itga3,Itgb6,Itgb8,Lats1,Map3k1,Map3k7,Nlk,Npnt,Nrep,Onecut1,Onecut2,Pml,Pparg,Ppm1a,Ptk2,Ptprk,Rasl11b,Sap30,Sin3a,Smad1,Smad2,Smad3,Smad7,Spry2,Strap,Suds3,Tgfb1,Tgfb2,Tgfb3,Usp15,Wfikkn2,Zmiz1	ENSFDAG00000000501,ENSFDAG00000000810,ENSFDAG00000002571,ENSFDAG00000002894,ENSFDAG00000003104,ENSFDAG00000003278,ENSFDAG00000004743,ENSFDAG00000005588,ENSFDAG00000006304,ENSFDAG00000007195,ENSFDAG00000007714,ENSFDAG00000007952,ENSFDAG00000008083,ENSFDAG00000008711,ENSFDAG00000010167,ENSFDAG00000010372,ENSFDAG00000010997,ENSFDAG00000011474,ENSFDAG00000011655,ENSFDAG00000011692,ENSFDAG00000011718,…	Primed-enhancers_Liver_11704,Primed-enhancers_Liver_12365,Primed-enhancers_Liver_12381,Primed-enhancers_Liver_12439,Primed-enhancers_Liver_12443,Primed-enhancers_Liver_15680,Primed-enhancers_Liver_16500,Primed-enhancers_Liver_17492,Primed-enhancers_Liver_20737,Primed-enhancers_Liver_21723,Primed-enhancers_Liver_21966,Primed-enhancers_Liver_21970,Primed-enhancers_Liver_24109,Primed-enhancers_Liver…
GO:1902960	negative regulation of aspartic-type endopeptidase activity involved in amyloid precursor protein catabolic process	6.41892	8	1.24631	0.00233	8.66201	3	0.34634	0.0231	Bin1,Sorl1,Tmed10	ENSFDAG00000008196,ENSFDAG00000009281,ENSFDAG00000014292	Primed-enhancers_Liver_16453,Primed-enhancers_Liver_34488,Primed-enhancers_Liver_72244,Primed-enhancers_Liver_72263,Primed-enhancers_Liver_72277,Primed-enhancers_Liver_72279,Primed-enhancers_Liver_72280,Primed-enhancers_Liver_72294
GO:0030509	BMP signaling pathway	1.73345	63	36.3436	0.00234	2.06238	35	16.9706	0.00101	Acvr1,Acvr2a,Bmp2,Bmp4,Chrd,Crb2,Crim1,Ctdspl2,Dlx1,Dlx3,Dlx5,Fam83g,Gata4,Gpc3,Hipk2,Itga3,Pelo,Pparg,Ppm1a,Rnf165,Skor1,Skor2,Smad1,Smad2,Smad3,Smad7,Sorl1,Tgfb1,Tgfb2,Tgfb3,Ube2o,Usp15,Vwc2l,Wnt5a,Zcchc12	ENSFDAG00000000057,ENSFDAG00000000501,ENSFDAG00000000810,ENSFDAG00000001117,ENSFDAG00000002076,ENSFDAG00000002894,ENSFDAG00000004399,ENSFDAG00000004474,ENSFDAG00000004743,ENSFDAG00000005671,ENSFDAG00000005890,ENSFDAG00000007193,ENSFDAG00000007195,ENSFDAG00000008083,ENSFDAG00000009044,ENSFDAG00000010997,ENSFDAG00000011474,ENSFDAG00000011655,ENSFDAG00000012174,ENSFDAG00000012332,ENSFDAG00000012435,…	Primed-enhancers_Liver_10908,Primed-enhancers_Liver_12439,Primed-enhancers_Liver_12443,Primed-enhancers_Liver_13667,Primed-enhancers_Liver_1564,Primed-enhancers_Liver_15680,Primed-enhancers_Liver_16500,Primed-enhancers_Liver_20904,Primed-enhancers_Liver_21917,Primed-enhancers_Liver_22351,Primed-enhancers_Liver_22352,Primed-enhancers_Liver_22974,Primed-enhancers_Liver_28400,Primed-enhancers_Liver_…
GO:0030522	intracellular receptor signaling pathway	1.62022	78	48.1417	0.00237	1.78214	43	24.1283	0.00352	Ar,Arid1a,Arntl,Asxl1,Asxl2,Bmp2,Clpb,Cry1,Cyp26a1,Cyp26b1,Dab2,Ddx17,Esr1,Esrrg,Foxp1,Fshr,Igf1,Isl1,Jak2,Kdm3a,Lacc1,Lats1,Lep,Mn1,Ncoa1,Ncoa2,Nr3c2,Ntrk2,Pml,Pparg,Ppargc1b,Pum1,Rarb,Rbfox2,Ripk2,Rora,Thrb,Tnfaip3,Usp15,Vdr,Zfp366,Zfp536,Zmiz1	ENSFDAG00000003286,ENSFDAG00000004743,ENSFDAG00000005395,ENSFDAG00000005504,ENSFDAG00000005632,ENSFDAG00000005695,ENSFDAG00000005876,ENSFDAG00000006049,ENSFDAG00000006096,ENSFDAG00000006204,ENSFDAG00000008011,ENSFDAG00000008341,ENSFDAG00000008515,ENSFDAG00000008670,ENSFDAG00000008719,ENSFDAG00000009028,ENSFDAG00000009326,ENSFDAG00000009967,ENSFDAG00000010085,ENSFDAG00000010372,ENSFDAG00000010527,…	Primed-enhancers_Liver_14034,Primed-enhancers_Liver_14098,Primed-enhancers_Liver_14102,Primed-enhancers_Liver_190,Primed-enhancers_Liver_19238,Primed-enhancers_Liver_20238,Primed-enhancers_Liver_20931,Primed-enhancers_Liver_21294,Primed-enhancers_Liver_21297,Primed-enhancers_Liver_21300,Primed-enhancers_Liver_21304,Primed-enhancers_Liver_21312,Primed-enhancers_Liver_21317,Primed-enhancers_Liver_2…
GO:0050435	amyloid-beta metabolic process	2.35366	28	11.8963	0.00237	2.20488	14	6.34956	0.0371	Ace,Bin1,Dyrk1a,Epha4,Ide,Ifng,Igf1,Ntrk2,Psen1,Rock1,Rock2,Rtn3,Sorl1,Tmed10	ENSFDAG00000005217,ENSFDAG00000007737,ENSFDAG00000008196,ENSFDAG00000009281,ENSFDAG00000009629,ENSFDAG00000010527,ENSFDAG00000010878,ENSFDAG00000012451,ENSFDAG00000012484,ENSFDAG00000013789,ENSFDAG00000014292,ENSFDAG00000015918,ENSFDAG00000016244,ENSFDAG00000018891	Primed-enhancers_Liver_13060,Primed-enhancers_Liver_14369,Primed-enhancers_Liver_16311,Primed-enhancers_Liver_16453,Primed-enhancers_Liver_1864,Primed-enhancers_Liver_1865,Primed-enhancers_Liver_1873,Primed-enhancers_Liver_19238,Primed-enhancers_Liver_30476,Primed-enhancers_Liver_33969,Primed-enhancers_Liver_33980,Primed-enhancers_Liver_33981,Primed-enhancers_Liver_33986,Primed-enhancers_Liver_34…
GO:0031016	pancreas development	2.80932	20	7.11915	0.00241	3.20815	10	3.11706	0.0114	Ctnnb1,Eif2ak3,Fgf10,Hnf1a,Invs,Isl1,Onecut1,Onecut2,Pdx1,Smad2	ENSFDAG00000002894,ENSFDAG00000003921,ENSFDAG00000006049,ENSFDAG00000007068,ENSFDAG00000009384,ENSFDAG00000014584,ENSFDAG00000014957,ENSFDAG00000016915,ENSFDAG00000017616,ENSFDAG00000018035	Primed-enhancers_Liver_20931,Primed-enhancers_Liver_20961,Primed-enhancers_Liver_20962,Primed-enhancers_Liver_20965,Primed-enhancers_Liver_20966,Primed-enhancers_Liver_20967,Primed-enhancers_Liver_35766,Primed-enhancers_Liver_35767,Primed-enhancers_Liver_35775,Primed-enhancers_Liver_36243,Primed-enhancers_Liver_36258,Primed-enhancers_Liver_36263,Primed-enhancers_Liver_50763,Primed-enhancers_Liver…
GO:0032872	regulation of stress-activated MAPK cascade	1.62752	76	46.6967	0.00246	1.85615	42	22.6275	0.00194	App,Bmp2,Bmp4,Ccl19,Dab2,Dab2ip,Dact1,Dlg1,Ephb1,Grik2,Hand2,Hipk2,Hmgb1,Hmgcr,Igf1r,Lep,Map3k1,Map3k5,Map3k7,Map4k2,Mfhas1,Mid1,Nod1,Oprk1,Pbk,Phlpp1,Pja2,Plcb1,Rell1,Ripk2,Sash1,Serpinf2,Sh3rf1,Stk3,Taok3,Tgfb2,Tlr3,Tnfsf11,Vegfa,Wnt16,Wnt5a,Zfp622	ENSFDAG00000000501,ENSFDAG00000002571,ENSFDAG00000002748,ENSFDAG00000003960,ENSFDAG00000005242,ENSFDAG00000005504,ENSFDAG00000005890,ENSFDAG00000006183,ENSFDAG00000006229,ENSFDAG00000006381,ENSFDAG00000006872,ENSFDAG00000007182,ENSFDAG00000007439,ENSFDAG00000008260,ENSFDAG00000008823,ENSFDAG00000009044,ENSFDAG00000009317,ENSFDAG00000009437,ENSFDAG00000009453,ENSFDAG00000009708,ENSFDAG00000010109,…	Primed-enhancers_Liver_11446,Primed-enhancers_Liver_15615,Primed-enhancers_Liver_190,Primed-enhancers_Liver_199,Primed-enhancers_Liver_20094,Primed-enhancers_Liver_20737,Primed-enhancers_Liver_218,Primed-enhancers_Liver_21917,Primed-enhancers_Liver_22351,Primed-enhancers_Liver_22352,Primed-enhancers_Liver_23134,Primed-enhancers_Liver_23645,Primed-enhancers_Liver_23646,Primed-enhancers_Liver_24601…
GO:0030856	regulation of epithelial cell differentiation	1.67311	70	41.8383	0.00252	1.85188	31	16.7398	0.0101	Add1,Bmp2,Bmp4,Ccnd1,Ctnnb1,Dicer1,Dll1,Fat4,Fgf10,Foxp1,Ifng,Klf7,Pax8,Plcb1,Prkch,Prlr,Rfx3,Rock1,Rock2,Six2,Sox9,Spry2,Srsf6,Tgfb2,Vdr,Vegfa,Vezf1,Wnt10b,Wnt9b,Wwtr1,Zfp36l1	ENSFDAG00000002748,ENSFDAG00000004569,ENSFDAG00000007236,ENSFDAG00000007436,ENSFDAG00000008068,ENSFDAG00000009044,ENSFDAG00000009326,ENSFDAG00000009384,ENSFDAG00000010026,ENSFDAG00000010878,ENSFDAG00000010914,ENSFDAG00000011238,ENSFDAG00000011655,ENSFDAG00000012191,ENSFDAG00000012354,ENSFDAG00000012435,ENSFDAG00000012484,ENSFDAG00000012886,ENSFDAG00000014165,ENSFDAG00000014938,ENSFDAG00000015306,…	Primed-enhancers_Liver_12159,Primed-enhancers_Liver_12161,Primed-enhancers_Liver_12958,Primed-enhancers_Liver_13448,Primed-enhancers_Liver_13470,Primed-enhancers_Liver_1400,Primed-enhancers_Liver_1404,Primed-enhancers_Liver_1407,Primed-enhancers_Liver_14369,Primed-enhancers_Liver_15749,Primed-enhancers_Liver_16024,Primed-enhancers_Liver_16027,Primed-enhancers_Liver_16028,Primed-enhancers_Liver_16…
GO:0030866	cortical actin cytoskeleton organization	3.07673	17	5.52534	0.0028	2.88734	12	4.15608	0.0101	Dlg1,Epb41,Epb41l1,Epb41l2,Epb41l3,Fmnl2,Fmnl3,Plek,Pls1,Rock1,Rock2,Vil1	ENSFDAG00000007182,ENSFDAG00000008680,ENSFDAG00000009788,ENSFDAG00000011012,ENSFDAG00000012153,ENSFDAG00000012484,ENSFDAG00000014407,ENSFDAG00000016001,ENSFDAG00000017748,ENSFDAG00000018438,ENSFDAG00000018891,ENSFDAG00000020446	Primed-enhancers_Liver_14369,Primed-enhancers_Liver_1740,Primed-enhancers_Liver_27466,Primed-enhancers_Liver_28757,Primed-enhancers_Liver_32895,Primed-enhancers_Liver_33969,Primed-enhancers_Liver_33980,Primed-enhancers_Liver_33981,Primed-enhancers_Liver_33986,Primed-enhancers_Liver_40896,Primed-enhancers_Liver_40898,Primed-enhancers_Liver_40903,Primed-enhancers_Liver_44390,Primed-enhancers_Liver_…
GO:0000122	negative regulation of transcription by RNA polymerase II	1.28835	235	182.404	0.00291	1.54341	147	95.2434	8.42e-06	Ahr,Akirin2,App,Ar,Arid1a,Asxl2,Atxn1,Bach1,Bach2,Bcl11a,Bcl6b,Bcor,Bin1,Bmp2,Bmp4,Cbx4,Ccnd1,Cpeb3,Crebbp,Cry1,Ctnnb1,Cul3,Cux1,Dab2,Dab2ip,Dact1,Deaf1,Dicer1,Dlg1,Dlx1,Dmap1,Dnmt3a,Dusp26,Epas1,Esr1,Etv5,Etv6,Fgfr1,Fgfr2,Foxp1,Gabpa,Gata4,Gli2,Gli3,Glis3,Gm28047,Gm45837,Gtf2ird1,Hba-x,Hbp1,Hdac7,Hdac9,Hipk2,Hmbox1,Hmbox1,Hmg20a,Hmgb1,Hnf1a,Hoxb13,Ifng,Isl1,Jarid2,Jph2,Klf12,Klf3,Klf4,Klf5,Klf7,…	ENSFDAG00000000054,ENSFDAG00000000295,ENSFDAG00000000501,ENSFDAG00000001423,ENSFDAG00000001807,ENSFDAG00000002080,ENSFDAG00000002328,ENSFDAG00000002748,ENSFDAG00000003190,ENSFDAG00000003357,ENSFDAG00000004743,ENSFDAG00000004839,ENSFDAG00000004922,ENSFDAG00000005217,ENSFDAG00000005238,ENSFDAG00000005537,ENSFDAG00000005671,ENSFDAG00000005741,ENSFDAG00000005761,ENSFDAG00000005951,ENSFDAG00000006049,…	Primed-enhancers_Liver_10472,Primed-enhancers_Liver_10701,Primed-enhancers_Liver_11193,Primed-enhancers_Liver_11634,Primed-enhancers_Liver_12134,Primed-enhancers_Liver_12471,Primed-enhancers_Liver_12472,Primed-enhancers_Liver_12538,Primed-enhancers_Liver_13448,Primed-enhancers_Liver_13470,Primed-enhancers_Liver_13811,Primed-enhancers_Liver_1400,Primed-enhancers_Liver_14034,Primed-enhancers_Liver_…
GO:0010921	regulation of phosphatase activity	1.96462	42	21.3782	0.00291	2.35265	22	9.35117	0.00308	Ahr,Bmp2,Gna12,Ifng,Itga2,Jak2,Magi2,Mgat5,Mtmr9,Npnt,Pawr,Plek,Ppargc1b,Ppp2ca,Ppp2ca,Ppp6r3,Rock1,Rock2,Smad3,Tgfb2,Uri1,Vcan	ENSFDAG00000002642,ENSFDAG00000005741,ENSFDAG00000005951,ENSFDAG00000007035,ENSFDAG00000007271,ENSFDAG00000008680,ENSFDAG00000008719,ENSFDAG00000010085,ENSFDAG00000010323,ENSFDAG00000010481,ENSFDAG00000010878,ENSFDAG00000011655,ENSFDAG00000011692,ENSFDAG00000011926,ENSFDAG00000012435,ENSFDAG00000012484,ENSFDAG00000014357,ENSFDAG00000017588,ENSFDAG00000018047,ENSFDAG00000018627,ENSFDAG00000018891,…	Primed-enhancers_Liver_10472,Primed-enhancers_Liver_14369,Primed-enhancers_Liver_14771,Primed-enhancers_Liver_19776,Primed-enhancers_Liver_19779,Primed-enhancers_Liver_20904,Primed-enhancers_Liver_22993,Primed-enhancers_Liver_2995,Primed-enhancers_Liver_3002,Primed-enhancers_Liver_3012,Primed-enhancers_Liver_3020,Primed-enhancers_Liver_33969,Primed-enhancers_Liver_33980,Primed-enhancers_Liver_339…
GO:0048536	spleen development	2.54151	23	9.04975	0.00291	2.57519	11	4.27152	0.0306	Ahr,Bcl2l11,Cdkn2b,Dicer1,Fgf10,Jarid2,Nfkb2,Nkx2-3,Onecut1,Slc40a1,Tlx1	ENSFDAG00000000295,ENSFDAG00000004662,ENSFDAG00000005741,ENSFDAG00000005748,ENSFDAG00000010154,ENSFDAG00000013373,ENSFDAG00000014957,ENSFDAG00000015224,ENSFDAG00000017546,ENSFDAG00000017616,ENSFDAG00000021287	Primed-enhancers_Liver_14771,Primed-enhancers_Liver_17039,Primed-enhancers_Liver_18600,Primed-enhancers_Liver_18612,Primed-enhancers_Liver_18633,Primed-enhancers_Liver_18634,Primed-enhancers_Liver_20961,Primed-enhancers_Liver_20962,Primed-enhancers_Liver_20965,Primed-enhancers_Liver_20966,Primed-enhancers_Liver_20967,Primed-enhancers_Liver_38331,Primed-enhancers_Liver_38337,Primed-enhancers_Liver…
GO:0007097	nuclear migration	3.19049	16	5.0149	0.00291	2.68821	9	3.34795	0.0442	Cdc42bpa,Clmn,Dock7,Dync1h1,Fbxw11,Ntn1,Ptk2,Syne2,Tacc2	ENSFDAG00000006517,ENSFDAG00000009167,ENSFDAG00000009473,ENSFDAG00000009932,ENSFDAG00000010167,ENSFDAG00000011130,ENSFDAG00000011716,ENSFDAG00000015365,ENSFDAG00000017101	Primed-enhancers_Liver_10023,Primed-enhancers_Liver_10025,Primed-enhancers_Liver_11051,Primed-enhancers_Liver_11069,Primed-enhancers_Liver_11083,Primed-enhancers_Liver_15857,Primed-enhancers_Liver_15858,Primed-enhancers_Liver_15865,Primed-enhancers_Liver_17050,Primed-enhancers_Liver_17207,Primed-enhancers_Liver_26335,Primed-enhancers_Liver_4868,Primed-enhancers_Liver_51946,Primed-enhancers_Liver_…
GO:0060592	mammary gland formation	3.98888	12	3.00836	0.00297	8.66201	4	0.461786	0.00502	Bmp4,Fgf10,Gli3,Pax3	ENSFDAG00000009044,ENSFDAG00000017616,ENSFDAG00000018863,ENSFDAG00000019521	Primed-enhancers_Liver_17758,Primed-enhancers_Liver_17763,Primed-enhancers_Liver_1864,Primed-enhancers_Liver_1865,Primed-enhancers_Liver_1873,Primed-enhancers_Liver_20961,Primed-enhancers_Liver_20962,Primed-enhancers_Liver_20965,Primed-enhancers_Liver_20966,Primed-enhancers_Liver_20967,Primed-enhancers_Liver_22351,Primed-enhancers_Liver_22352
GO:1900744	regulation of p38MAPK cascade	2.41752	26	10.7548	0.00304	2.74649	13	4.73331	0.0102	Bmp2,Bmp4,Dab2ip,Dlg1,Hand2,Lep,Mfhas1,Oprk1,Phlpp1,Pja2,Rell1,Sash1,Vegfa	ENSFDAG00000002748,ENSFDAG00000005242,ENSFDAG00000006229,ENSFDAG00000007182,ENSFDAG00000008260,ENSFDAG00000009044,ENSFDAG00000009453,ENSFDAG00000011556,ENSFDAG00000011655,ENSFDAG00000013790,ENSFDAG00000016565,ENSFDAG00000016684,ENSFDAG00000017614	Primed-enhancers_Liver_22351,Primed-enhancers_Liver_22352,Primed-enhancers_Liver_2732,Primed-enhancers_Liver_28757,Primed-enhancers_Liver_32246,Primed-enhancers_Liver_32752,Primed-enhancers_Liver_32753,Primed-enhancers_Liver_32763,Primed-enhancers_Liver_40339,Primed-enhancers_Liver_40342,Primed-enhancers_Liver_43490,Primed-enhancers_Liver_43508,Primed-enhancers_Liver_43510,Primed-enhancers_Liver_…
GO:0046541	saliva secretion	3.46063	14	4.04551	0.00329	4.33101	7	1.61625	0.00971	Aqp1,Aqp5,Fgf10,Kcnma1,Oprk1,Ppp3ca,Trpc1	ENSFDAG00000006229,ENSFDAG00000007314,ENSFDAG00000008207,ENSFDAG00000011525,ENSFDAG00000017616,ENSFDAG00000018762,ENSFDAG00000019290	Primed-enhancers_Liver_20961,Primed-enhancers_Liver_20962,Primed-enhancers_Liver_20965,Primed-enhancers_Liver_20966,Primed-enhancers_Liver_20967,Primed-enhancers_Liver_21659,Primed-enhancers_Liver_21665,Primed-enhancers_Liver_27487,Primed-enhancers_Liver_47,Primed-enhancers_Liver_48,Primed-enhancers_Liver_48967,Primed-enhancers_Liver_49002,Primed-enhancers_Liver_60587,Primed-enhancers_Liver_74609
GO:0007265	Ras protein signal transduction	1.49665	102	68.1522	0.00346	1.48415	55	37.0584	0.0247	Abca1,Abl2,Abra,Arfgef2,Arhgap35,Arhgef11,Arhgef2,Arhgef28,Auts2,Auts2,Cbl,Cdh2,Cul3,Dab2ip,Dennd1a,Dennd4a,Dgki,Dlc1,Dock2,Eps8,Farp2,Fgf10,Gna12,Hacd3,Igf1,Iqsec3,Itga3,Itpkb,Mapkap1,Mapre2,Net1,Nradd,Nrg1,Nrp1,Ntn1,Ophn1,Phactr4,Pik3cg,Prag1,Psd,Psd3,Ralb,Ralgapa2,Ralgps2,Rap1a,Rasgrf1,Robo1,Rock1,Rock2,Sh2b2,Spry2,Syngap1,Tgfb2,Usp28,Wasf2	ENSFDAG00000001218,ENSFDAG00000002987,ENSFDAG00000003325,ENSFDAG00000004026,ENSFDAG00000004497,ENSFDAG00000004907,ENSFDAG00000005299,ENSFDAG00000005706,ENSFDAG00000005790,ENSFDAG00000006090,ENSFDAG00000006377,ENSFDAG00000007589,ENSFDAG00000007990,ENSFDAG00000008214,ENSFDAG00000008332,ENSFDAG00000008393,ENSFDAG00000009150,ENSFDAG00000009167,ENSFDAG00000009429,ENSFDAG00000009505,ENSFDAG00000010192,…	Primed-enhancers_Liver_10091,Primed-enhancers_Liver_11051,Primed-enhancers_Liver_11069,Primed-enhancers_Liver_11083,Primed-enhancers_Liver_12439,Primed-enhancers_Liver_12443,Primed-enhancers_Liver_14369,Primed-enhancers_Liver_14627,Primed-enhancers_Liver_17523,Primed-enhancers_Liver_17526,Primed-enhancers_Liver_1959,Primed-enhancers_Liver_1973,Primed-enhancers_Liver_20126,Primed-enhancers_Liver_2…
GO:0060594	mammary gland specification	4.59939	10	2.1742	0.00348	8.66201	3	0.34634	0.0231	Fgf10,Gli3,Pax3	ENSFDAG00000017616,ENSFDAG00000018863,ENSFDAG00000019521	Primed-enhancers_Liver_17758,Primed-enhancers_Liver_17763,Primed-enhancers_Liver_1864,Primed-enhancers_Liver_1865,Primed-enhancers_Liver_1873,Primed-enhancers_Liver_20961,Primed-enhancers_Liver_20962,Primed-enhancers_Liver_20965,Primed-enhancers_Liver_20966,Primed-enhancers_Liver_20967
GO:0070374	positive regulation of ERK1 and ERK2 cascade	1.61088	74	45.9377	0.0035	1.78336	42	23.5511	0.00396	Abl2,Ackr3,Angpt1,App,Bmp2,Bmp4,Braf,C1qtnf3,Calcr,Ccl17,Ccl19,Cd44,Cxcl12,Esr1,Fgf10,Fgfr2,Fshr,Garem1,Gata4,Hand2,Hmgb1,Hmgcr,Igf1,Mfhas1,Nelfe,Nod1,Npnt,Nptn,Npy,Nrg1,Nrp1,P2ry1,Pdgfa,Prkd2,Pten,Rap1a,Ripk2,Serpinf2,Spry2,Tgfb1,Tnfsf11,Vegfa	ENSFDAG00000000130,ENSFDAG00000002748,ENSFDAG00000003809,ENSFDAG00000004696,ENSFDAG00000005504,ENSFDAG00000005671,ENSFDAG00000006826,ENSFDAG00000008083,ENSFDAG00000008214,ENSFDAG00000008260,ENSFDAG00000008823,ENSFDAG00000009044,ENSFDAG00000009317,ENSFDAG00000009440,ENSFDAG00000009453,ENSFDAG00000009708,ENSFDAG00000010109,ENSFDAG00000010527,ENSFDAG00000010574,ENSFDAG00000011166,ENSFDAG00000011589,…	Primed-enhancers_Liver_11446,Primed-enhancers_Liver_190,Primed-enhancers_Liver_199,Primed-enhancers_Liver_20094,Primed-enhancers_Liver_20961,Primed-enhancers_Liver_20962,Primed-enhancers_Liver_20965,Primed-enhancers_Liver_20966,Primed-enhancers_Liver_20967,Primed-enhancers_Liver_218,Primed-enhancers_Liver_22351,Primed-enhancers_Liver_22352,Primed-enhancers_Liver_22974,Primed-enhancers_Liver_23645…
GO:0007617	mating behavior	2.61951	21	8.01677	0.0035	3.46481	10	2.88616	0.00666	Abat,Aplp2,App,Ar,Cyp11a1,Dmrta1,Ncoa1,Ncoa2,Pten,Thrb	ENSFDAG00000004696,ENSFDAG00000005827,ENSFDAG00000005854,ENSFDAG00000010961,ENSFDAG00000011788,ENSFDAG00000013126,ENSFDAG00000014810,ENSFDAG00000017412,ENSFDAG00000018450,ENSFDAG00000019085	Primed-enhancers_Liver_14098,Primed-enhancers_Liver_14102,Primed-enhancers_Liver_190,Primed-enhancers_Liver_21312,Primed-enhancers_Liver_21317,Primed-enhancers_Liver_21346,Primed-enhancers_Liver_21350,Primed-enhancers_Liver_21381,Primed-enhancers_Liver_21386,Primed-enhancers_Liver_27923,Primed-enhancers_Liver_30110,Primed-enhancers_Liver_30127,Primed-enhancers_Liver_30128,Primed-enhancers_Liver_3…
GO:2000112	regulation of cellular macromolecule biosynthetic process	1.46535	109	74.3849	0.00397	1.38119	70	50.6811	0.0367	Aatf,Ago2,App,Bank1,Barhl2,Boll,Bzw2,Ccl19,Ccr7,Cnot6l,Cpeb3,Cpeb4,Csde1,Ctif,Ctnnb1,Ddx3x,Ddx6,Dph5,Dyrk2,Eif1,Eif2ak3,Eif2s3x,Eif3e,Eif4e3,Eif4ebp3,Eif5,Eif5a2,Elavl4,Enc1,Eprs,Fastkd2,Fech,Fto,Igf1,Irs1,Itga2,Itm2b,Kbtbd8,Klf4,Mettl8,Mrps27,Nat10,Nck1,Neurl1a,Npm1,Nsun3,Paip2,Pawr,Pelo,Plcb1,Pml,Ppp1cb,Ppp1r3b,Ppp1r3f,Prr16,Pum1,Pum3,Pxylp1,Rab3gap1,Rbms3,Rock1,Rock2,Serp1,Sorbs1,Srp9,Tnrc6c,T…	ENSFDAG00000001180,ENSFDAG00000001381,ENSFDAG00000001546,ENSFDAG00000002076,ENSFDAG00000002735,ENSFDAG00000003815,ENSFDAG00000003999,ENSFDAG00000004759,ENSFDAG00000006089,ENSFDAG00000006187,ENSFDAG00000006329,ENSFDAG00000006336,ENSFDAG00000007035,ENSFDAG00000007271,ENSFDAG00000007719,ENSFDAG00000007742,ENSFDAG00000007882,ENSFDAG00000008278,ENSFDAG00000008813,ENSFDAG00000009263,ENSFDAG00000009384,…	Primed-enhancers_Liver_1075,Primed-enhancers_Liver_1077,Primed-enhancers_Liver_1078,Primed-enhancers_Liver_11968,Primed-enhancers_Liver_11969,Primed-enhancers_Liver_12754,Primed-enhancers_Liver_13710,Primed-enhancers_Liver_13720,Primed-enhancers_Liver_13721,Primed-enhancers_Liver_1400,Primed-enhancers_Liver_1404,Primed-enhancers_Liver_14369,Primed-enhancers_Liver_14803,Primed-enhancers_Liver_1602…
GO:0061614	miRNA transcription	1.95857	40	20.4231	0.00438	2.1655	17	7.85037	0.023	App,Bmp2,Bmp4,Ddx17,Ets1,Klf4,Klf5,Myc,Nfib,Ppard,Pparg,Smad1,Smad3,Sox9,Tead1,Tgfb1,Tgfb2	ENSFDAG00000004743,ENSFDAG00000004839,ENSFDAG00000005761,ENSFDAG00000008083,ENSFDAG00000009044,ENSFDAG00000009967,ENSFDAG00000010886,ENSFDAG00000011655,ENSFDAG00000012167,ENSFDAG00000012435,ENSFDAG00000012886,ENSFDAG00000013477,ENSFDAG00000014357,ENSFDAG00000014421,ENSFDAG00000015541,ENSFDAG00000016309,ENSFDAG00000018450	Primed-enhancers_Liver_13448,Primed-enhancers_Liver_13470,Primed-enhancers_Liver_22351,Primed-enhancers_Liver_22352,Primed-enhancers_Liver_23892,Primed-enhancers_Liver_23900,Primed-enhancers_Liver_23903,Primed-enhancers_Liver_23923,Primed-enhancers_Liver_26005,Primed-enhancers_Liver_26661,Primed-enhancers_Liver_30110,Primed-enhancers_Liver_30127,Primed-enhancers_Liver_30128,Primed-enhancers_Liver…
GO:0048566	embryonic digestive tract development	2.69858	19	7.04075	0.00459	3.46481	6	1.7317	0.047	Fgf10,Gli2,Gli3,Pcsk5,Rarb,Rarres2	ENSFDAG00000006096,ENSFDAG00000006541,ENSFDAG00000012545,ENSFDAG00000015179,ENSFDAG00000017616,ENSFDAG00000018863	Primed-enhancers_Liver_17758,Primed-enhancers_Liver_17763,Primed-enhancers_Liver_20961,Primed-enhancers_Liver_20962,Primed-enhancers_Liver_20965,Primed-enhancers_Liver_20966,Primed-enhancers_Liver_20967,Primed-enhancers_Liver_21294,Primed-enhancers_Liver_21297,Primed-enhancers_Liver_21300,Primed-enhancers_Liver_21304,Primed-enhancers_Liver_21312,Primed-enhancers_Liver_21317,Primed-enhancers_Liver…
GO:0010001	glial cell differentiation	1.61821	69	42.6396	0.00459	1.87585	34	18.1251	0.00548	Abl2,Actr3,Afdn,Bin1,Bmp2,Bmp4,Cdh2,Crb1,Ctnnb1,Dicer1,Dlx1,Epha4,Exoc4,Fgf10,Gli3,Igf1,Il6st,Lingo1,Nab1,Nfib,Nfix,Nrg1,Ntrk2,Plpp3,Pparg,Ptn,Ptpra,Slc8a3,Sox5,Sox6,Sox9,Tenm4,Tgfb1,Tnfrsf1b	ENSFDAG00000004743,ENSFDAG00000004755,ENSFDAG00000004944,ENSFDAG00000005428,ENSFDAG00000005565,ENSFDAG00000006090,ENSFDAG00000007598,ENSFDAG00000007737,ENSFDAG00000008083,ENSFDAG00000008196,ENSFDAG00000008214,ENSFDAG00000008883,ENSFDAG00000009044,ENSFDAG00000009384,ENSFDAG00000009958,ENSFDAG00000010527,ENSFDAG00000011655,ENSFDAG00000012167,ENSFDAG00000012199,ENSFDAG00000012886,ENSFDAG00000014923,…	Primed-enhancers_Liver_13448,Primed-enhancers_Liver_13470,Primed-enhancers_Liver_16134,Primed-enhancers_Liver_17039,Primed-enhancers_Liver_17758,Primed-enhancers_Liver_17763,Primed-enhancers_Liver_1864,Primed-enhancers_Liver_1865,Primed-enhancers_Liver_1873,Primed-enhancers_Liver_19238,Primed-enhancers_Liver_20766,Primed-enhancers_Liver_20961,Primed-enhancers_Liver_20962,Primed-enhancers_Liver_20…
GO:0051216	cartilage development	1.62028	69	42.5851	0.00459	1.84298	30	16.278	0.0128	Bmp2,Bmp3,Bmp4,Col1a1,Creb3l2,Ctnnb1,Dicer1,Gli2,Gli3,Hoxd3,Itgb8,Lep,Lnpk,Maf,Mkx,Rarb,Six2,Smad1,Smad3,Smad7,Sox5,Sox6,Sox9,Tgfb1,Tgfb2,Thbs3,Thrb,Trps1,Wnt5a,Zbtb16	ENSFDAG00000000530,ENSFDAG00000003104,ENSFDAG00000004129,ENSFDAG00000004569,ENSFDAG00000005890,ENSFDAG00000006096,ENSFDAG00000008006,ENSFDAG00000008083,ENSFDAG00000009044,ENSFDAG00000009384,ENSFDAG00000010014,ENSFDAG00000010330,ENSFDAG00000011655,ENSFDAG00000012035,ENSFDAG00000012104,ENSFDAG00000012415,ENSFDAG00000012435,ENSFDAG00000012545,ENSFDAG00000012886,ENSFDAG00000013790,ENSFDAG00000014357,…	Primed-enhancers_Liver_12421,Primed-enhancers_Liver_13448,Primed-enhancers_Liver_13470,Primed-enhancers_Liver_17039,Primed-enhancers_Liver_17492,Primed-enhancers_Liver_17758,Primed-enhancers_Liver_17763,Primed-enhancers_Liver_21294,Primed-enhancers_Liver_21297,Primed-enhancers_Liver_21300,Primed-enhancers_Liver_21304,Primed-enhancers_Liver_21312,Primed-enhancers_Liver_21317,Primed-enhancers_Liver…
GO:0031018	endocrine pancreas development	2.89187	17	5.87855	0.00459	4.33101	9	2.07804	0.0024	Eif2ak3,Gipr,Neurod1,Onecut1,Onecut2,Pde3b,Pdx1,Rfx3,Sox9	ENSFDAG00000009191,ENSFDAG00000012194,ENSFDAG00000012886,ENSFDAG00000014584,ENSFDAG00000014957,ENSFDAG00000016041,ENSFDAG00000016915,ENSFDAG00000017243,ENSFDAG00000018035	Primed-enhancers_Liver_13448,Primed-enhancers_Liver_13470,Primed-enhancers_Liver_35766,Primed-enhancers_Liver_35767,Primed-enhancers_Liver_35775,Primed-enhancers_Liver_37556,Primed-enhancers_Liver_37559,Primed-enhancers_Liver_41973,Primed-enhancers_Liver_58664,Primed-enhancers_Liver_60783,Primed-enhancers_Liver_63695,Primed-enhancers_Liver_66263,Primed-enhancers_Liver_66264,Primed-enhancers_Liver…
GO:0010922	positive regulation of phosphatase activity	2.28722	26	11.3675	0.00463	3.93728	15	3.80974	0.000111	Bmp2,Gna12,Ifng,Itga2,Jak2,Magi2,Mtmr9,Npnt,Pawr,Plek,Ppargc1b,Ppp2ca,Ppp2ca,Rock1,Smad3	ENSFDAG00000005951,ENSFDAG00000007035,ENSFDAG00000007271,ENSFDAG00000008680,ENSFDAG00000008719,ENSFDAG00000010085,ENSFDAG00000010481,ENSFDAG00000010878,ENSFDAG00000011655,ENSFDAG00000011692,ENSFDAG00000012484,ENSFDAG00000014357,ENSFDAG00000017588,ENSFDAG00000018047,ENSFDAG00000021126	Primed-enhancers_Liver_10472,Primed-enhancers_Liver_20904,Primed-enhancers_Liver_22993,Primed-enhancers_Liver_33969,Primed-enhancers_Liver_33980,Primed-enhancers_Liver_33981,Primed-enhancers_Liver_33986,Primed-enhancers_Liver_35618,Primed-enhancers_Liver_35619,Primed-enhancers_Liver_37616,Primed-enhancers_Liver_43490,Primed-enhancers_Liver_43508,Primed-enhancers_Liver_43510,Primed-enhancers_Liver…
GO:0034205	amyloid-beta formation	2.42154	24	9.91105	0.00483	2.41731	12	4.9642	0.0337	Bin1,Dyrk1a,Epha4,Ifng,Igf1,Ntrk2,Psen1,Rock1,Rock2,Rtn3,Sorl1,Tmed10	ENSFDAG00000005217,ENSFDAG00000007737,ENSFDAG00000008196,ENSFDAG00000009281,ENSFDAG00000010527,ENSFDAG00000010878,ENSFDAG00000012484,ENSFDAG00000013789,ENSFDAG00000014292,ENSFDAG00000015918,ENSFDAG00000016244,ENSFDAG00000018891	Primed-enhancers_Liver_14369,Primed-enhancers_Liver_16311,Primed-enhancers_Liver_16453,Primed-enhancers_Liver_1864,Primed-enhancers_Liver_1865,Primed-enhancers_Liver_1873,Primed-enhancers_Liver_19238,Primed-enhancers_Liver_30476,Primed-enhancers_Liver_33969,Primed-enhancers_Liver_33980,Primed-enhancers_Liver_33981,Primed-enhancers_Liver_33986,Primed-enhancers_Liver_34488,Primed-enhancers_Liver_36…
GO:0002064	epithelial cell development	1.64496	66	40.1226	0.00493	1.7324	32	18.4715	0.0209	Add1,Afdn,Arntl,Asxl1,Bmp4,Cdh2,Cftr,Dicer1,Dll1,Esr1,Fgfr2,Fshr,Gm45837,Il6st,Klf5,Map7,Onecut1,Onecut2,Palld,Pdpk1,Plcb1,Rap1a,Rarb,Rdx,Rfx3,Rock1,Rock2,Sox9,Tjp1,Vegfa,Vezf1,Wnt5a	ENSFDAG00000002748,ENSFDAG00000004944,ENSFDAG00000005632,ENSFDAG00000005695,ENSFDAG00000005890,ENSFDAG00000005925,ENSFDAG00000006090,ENSFDAG00000006096,ENSFDAG00000007616,ENSFDAG00000008068,ENSFDAG00000008966,ENSFDAG00000009044,ENSFDAG00000010026,ENSFDAG00000010574,ENSFDAG00000012484,ENSFDAG00000012886,ENSFDAG00000012973,ENSFDAG00000013054,ENSFDAG00000013505,ENSFDAG00000014165,ENSFDAG00000014656,…	Primed-enhancers_Liver_12159,Primed-enhancers_Liver_12161,Primed-enhancers_Liver_13448,Primed-enhancers_Liver_13470,Primed-enhancers_Liver_14369,Primed-enhancers_Liver_17039,Primed-enhancers_Liver_20766,Primed-enhancers_Liver_21294,Primed-enhancers_Liver_21297,Primed-enhancers_Liver_21300,Primed-enhancers_Liver_21304,Primed-enhancers_Liver_21312,Primed-enhancers_Liver_21317,Primed-enhancers_Liver…
GO:0009887	animal organ morphogenesis	1.29448	205	158.365	0.00511	1.71259	121	70.6533	7.06e-07	Abl2,Acvr2a,Afdn,Ahr,Alpk2,Ap3b1,Aqp1,Aqp5,Ar,Arid2,Asxl1,Asxl2,Atrn,Bcl2l11,Bcor,Bmp2,Bmp4,Cdh2,Cftr,Chd7,Col1a1,Ctnnb1,Cul3,Cyp26b1,Dab2,Dact1,Dicer1,Dlc1,Dlg1,Dll1,Dlx1,Dlx3,Dlx5,Egflam,Enam,Ephb1,Ereg,Etv5,Fam20c,Fat4,Fbxw11,Fgf10,Fgf3,Fgfr1,Fgfr2,Fras1,Fzd6,Gata4,Gli2,Gli3,Gpc3,Hand2,Hhip,Hipk2,Hoxb1,Hoxd13,Hoxd3,Hoxd4,Igf1r,Inhba,Irx5,Isl1,Itga2,Kat6a,Lamb1,Lrp5,Meis1,Mllt3,Myc,Nectin1,Neur…	ENSFDAG00000000334,ENSFDAG00000000368,ENSFDAG00000000501,ENSFDAG00000000528,ENSFDAG00000000810,ENSFDAG00000001117,ENSFDAG00000001188,ENSFDAG00000002080,ENSFDAG00000002523,ENSFDAG00000002748,ENSFDAG00000002894,ENSFDAG00000004129,ENSFDAG00000004447,ENSFDAG00000004569,ENSFDAG00000004696,ENSFDAG00000004839,ENSFDAG00000005217,ENSFDAG00000005574,ENSFDAG00000005632,ENSFDAG00000005671,ENSFDAG00000005741,…	Primed-enhancers_Liver_10023,Primed-enhancers_Liver_10025,Primed-enhancers_Liver_11051,Primed-enhancers_Liver_11069,Primed-enhancers_Liver_11083,Primed-enhancers_Liver_12421,Primed-enhancers_Liver_12443,Primed-enhancers_Liver_12562,Primed-enhancers_Liver_12958,Primed-enhancers_Liver_1304,Primed-enhancers_Liver_1305,Primed-enhancers_Liver_1307,Primed-enhancers_Liver_13448,Primed-enhancers_Liver_13…
GO:0007229	integrin-mediated signaling pathway	1.99712	35	17.5252	0.00512	2.3285	25	10.7365	0.00155	Arhgap35,Bcar1,Ctnna1,Cul3,Dab2,Fermt1,Fyb,Itga2,Itga3,Itga9,Itgb6,Itgb7,Itgb8,Lamb1,Nrp1,Pcsk5,Phactr4,Plek,Plpp3,Pram1,Ptk2,Ptn,Ptpra,Thy1,Txk	ENSFDAG00000002987,ENSFDAG00000003104,ENSFDAG00000005565,ENSFDAG00000006541,ENSFDAG00000007035,ENSFDAG00000007714,ENSFDAG00000008160,ENSFDAG00000008680,ENSFDAG00000008711,ENSFDAG00000008883,ENSFDAG00000010167,ENSFDAG00000010192,ENSFDAG00000010372,ENSFDAG00000012001,ENSFDAG00000012019,ENSFDAG00000012888,ENSFDAG00000013884,ENSFDAG00000014905,ENSFDAG00000014923,ENSFDAG00000015596,ENSFDAG00000016677,…	Primed-enhancers_Liver_12439,Primed-enhancers_Liver_12443,Primed-enhancers_Liver_14573,Primed-enhancers_Liver_14580,Primed-enhancers_Liver_14581,Primed-enhancers_Liver_17492,Primed-enhancers_Liver_1959,Primed-enhancers_Liver_1973,Primed-enhancers_Liver_20904,Primed-enhancers_Liver_24601,Primed-enhancers_Liver_24608,Primed-enhancers_Liver_26335,Primed-enhancers_Liver_27643,Primed-enhancers_Liver_3…
GO:1902003	regulation of amyloid-beta formation	2.43871	22	9.02116	0.0053	2.54765	10	3.92518	0.043	Bin1,Epha4,Ifng,Igf1,Ntrk2,Rock1,Rock2,Rtn3,Sorl1,Tmed10	ENSFDAG00000007737,ENSFDAG00000008196,ENSFDAG00000009281,ENSFDAG00000010527,ENSFDAG00000010878,ENSFDAG00000012484,ENSFDAG00000014292,ENSFDAG00000015918,ENSFDAG00000016244,ENSFDAG00000018891	Primed-enhancers_Liver_14369,Primed-enhancers_Liver_16453,Primed-enhancers_Liver_1864,Primed-enhancers_Liver_1865,Primed-enhancers_Liver_1873,Primed-enhancers_Liver_19238,Primed-enhancers_Liver_33969,Primed-enhancers_Liver_33980,Primed-enhancers_Liver_33981,Primed-enhancers_Liver_33986,Primed-enhancers_Liver_34488,Primed-enhancers_Liver_36791,Primed-enhancers_Liver_36886,Primed-enhancers_Liver_36…
GO:0006930	substrate-dependent cell migration, cell extension	3.59365	12	3.33922	0.00565	4.33101	5	1.15447	0.0367	Abl2,Cttn,Nck1,Nrp1,Ntn1	ENSFDAG00000008214,ENSFDAG00000009167,ENSFDAG00000011943,ENSFDAG00000016928,ENSFDAG00000020869	Primed-enhancers_Liver_11051,Primed-enhancers_Liver_11069,Primed-enhancers_Liver_11083,Primed-enhancers_Liver_3976,Primed-enhancers_Liver_46735,Primed-enhancers_Liver_67475,Primed-enhancers_Liver_71263,Primed-enhancers_Liver_71272,Primed-enhancers_Liver_71273,Primed-enhancers_Liver_71282,Primed-enhancers_Liver_71283,Primed-enhancers_Liver_75811
GO:1902893	regulation of miRNA transcription	1.91533	39	20.362	0.00572	2.09988	16	7.61947	0.0352	App,Bmp2,Bmp4,Ets1,Klf4,Klf5,Myc,Nfib,Ppard,Pparg,Smad1,Smad3,Sox9,Tead1,Tgfb1,Tgfb2	ENSFDAG00000004743,ENSFDAG00000004839,ENSFDAG00000005761,ENSFDAG00000008083,ENSFDAG00000009044,ENSFDAG00000010886,ENSFDAG00000011655,ENSFDAG00000012167,ENSFDAG00000012435,ENSFDAG00000012886,ENSFDAG00000013477,ENSFDAG00000014357,ENSFDAG00000014421,ENSFDAG00000015541,ENSFDAG00000016309,ENSFDAG00000018450	Primed-enhancers_Liver_13448,Primed-enhancers_Liver_13470,Primed-enhancers_Liver_22351,Primed-enhancers_Liver_22352,Primed-enhancers_Liver_23892,Primed-enhancers_Liver_23900,Primed-enhancers_Liver_23903,Primed-enhancers_Liver_23923,Primed-enhancers_Liver_26005,Primed-enhancers_Liver_30110,Primed-enhancers_Liver_30127,Primed-enhancers_Liver_30128,Primed-enhancers_Liver_31591,Primed-enhancers_Liver…
GO:0010817	regulation of hormone levels	1.35454	153	112.954	0.00591	1.5257	93	60.9558	0.000913	Aanat,Abat,Ace,Acvr1c,Acvr2a,Adcy8,Adh6a,Adora3,Aldh8a1,Ano1,Aqp1,Arntl,Atp6ap2,BC048507,Blk,Bmp2,C1qtnf3,Cacna1c,Cacna1h,Cask,Cftr,Chd7,Clcn2,Corin,Cpa3,Cpq,Cry1,Cyp11a1,Cyp26a1,Cyp26b1,Dab2,Efna5,Esr1,Fgfr1,Fshr,Gal,Ghsr,Gipr,Gja6,Glul,Gpr68,Hmgcr,Hnf1a,Ide,Ifng,Igf1,Igf1r,Inhba,Inhbb,Irs1,Isl1,Iyd,Jak2,Kcnj6,Kcnma1,Klf7,Lep,Lhcgr,Lrp5,Mtnr1a,Mtnr1b,Neurod1,Npvf,Nr5a1,Nrg1,Oprk1,P2ry1,Pax8,Pcsk…	ENSFDAG00000000130,ENSFDAG00000000528,ENSFDAG00000001117,ENSFDAG00000001783,ENSFDAG00000002080,ENSFDAG00000002233,ENSFDAG00000002894,ENSFDAG00000002995,ENSFDAG00000003152,ENSFDAG00000003167,ENSFDAG00000003809,ENSFDAG00000004027,ENSFDAG00000004453,ENSFDAG00000004743,ENSFDAG00000005202,ENSFDAG00000005659,ENSFDAG00000005695,ENSFDAG00000005761,ENSFDAG00000006049,ENSFDAG00000006229,ENSFDAG00000006381,…	Primed-enhancers_Liver_13060,Primed-enhancers_Liver_13667,Primed-enhancers_Liver_1400,Primed-enhancers_Liver_1404,Primed-enhancers_Liver_1407,Primed-enhancers_Liver_16881,Primed-enhancers_Liver_16886,Primed-enhancers_Liver_17039,Primed-enhancers_Liver_17763,Primed-enhancers_Liver_17781,Primed-enhancers_Liver_17791,Primed-enhancers_Liver_17804,Primed-enhancers_Liver_17806,Primed-enhancers_Liver_19…
GO:0061312	BMP signaling pathway involved in heart development	3.82177	11	2.87825	0.00596	5.77468	4	0.69268	0.0295	Acvr1,Bmp2,Bmp4,Chrd	ENSFDAG00000007195,ENSFDAG00000009044,ENSFDAG00000011655,ENSFDAG00000012332	Primed-enhancers_Liver_22351,Primed-enhancers_Liver_22352,Primed-enhancers_Liver_28400,Primed-enhancers_Liver_40999,Primed-enhancers_Liver_41000,Primed-enhancers_Liver_43490,Primed-enhancers_Liver_43508,Primed-enhancers_Liver_43510,Primed-enhancers_Liver_43515,Primed-enhancers_Liver_43519,Primed-enhancers_Liver_43522
GO:0051093	negative regulation of developmental process	1.22649	289	235.632	0.00685	1.45588	159	109.212	6.1e-05	Actr3,Adamts9,Adgrb1,Adgrb3,Ahr,Alpk2,App,Arhgef2,Arntl,Asap1,Asxl1,Bcar1,Bcl11a,Bcor,Bmp2,Bmp4,Ccl17,Ccnd1,Cd44,Cd59b,Cdkn2b,Cftr,Chrd,Cntn4,Crim1,Ctnna1,Ctnnb1,Cxcl14,Dab2ip,Ddx6,Dicer1,Dlk1,Dll1,Dlx1,Dpysl5,Dtnbp1,Efna5,Elf5,Epha4,Ephb1,Ereg,Fat3,Fermt1,Fgf10,Fgf3,Fgfr1,Fndc3b,Foxp1,Gabpa,Gdf10,Gja6,Gli2,Gli3,Gpr68,Grb14,Hand2,Hbp1,Hdac7,Hdac8,Hdac9,Hhip,Hmg20a,Hmgb1,Hspa9,Ifng,Igf1,Inhba,Isl1…	ENSFDAG00000000295,ENSFDAG00000000368,ENSFDAG00000001153,ENSFDAG00000001188,ENSFDAG00000002080,ENSFDAG00000002280,ENSFDAG00000002748,ENSFDAG00000003357,ENSFDAG00000004569,ENSFDAG00000004696,ENSFDAG00000004743,ENSFDAG00000004755,ENSFDAG00000004839,ENSFDAG00000005173,ENSFDAG00000005217,ENSFDAG00000005395,ENSFDAG00000005565,ENSFDAG00000005632,ENSFDAG00000005659,ENSFDAG00000005695,ENSFDAG00000005741,…	Primed-enhancers_Liver_10472,Primed-enhancers_Liver_10617,Primed-enhancers_Liver_10800,Primed-enhancers_Liver_10804,Primed-enhancers_Liver_11051,Primed-enhancers_Liver_11069,Primed-enhancers_Liver_11083,Primed-enhancers_Liver_11629,Primed-enhancers_Liver_11634,Primed-enhancers_Liver_12958,Primed-enhancers_Liver_13020,Primed-enhancers_Liver_13448,Primed-enhancers_Liver_13470,Primed-enhancers_Liver…
GO:0035303	regulation of dephosphorylation	1.75687	49	27.8904	0.00705	1.90142	27	14.1999	0.0137	Ahr,Bmp2,Dlc1,Gna12,Ifng,Itga2,Jak2,Magi2,Mfhas1,Mgat5,Mtmr9,Npnt,Pawr,Plek,Ppargc1b,Ppp2ca,Ppp2ca,Ppp6r3,Rock1,Rock2,Smad3,Sppl3,Swap70,Tgfb1,Tgfb2,Uri1,Vcan	ENSFDAG00000002642,ENSFDAG00000005741,ENSFDAG00000005951,ENSFDAG00000007035,ENSFDAG00000007271,ENSFDAG00000008083,ENSFDAG00000008260,ENSFDAG00000008680,ENSFDAG00000008719,ENSFDAG00000010085,ENSFDAG00000010323,ENSFDAG00000010481,ENSFDAG00000010878,ENSFDAG00000011655,ENSFDAG00000011692,ENSFDAG00000011926,ENSFDAG00000012435,ENSFDAG00000012484,ENSFDAG00000013386,ENSFDAG00000013695,ENSFDAG00000014285,…	Primed-enhancers_Liver_10472,Primed-enhancers_Liver_14369,Primed-enhancers_Liver_14771,Primed-enhancers_Liver_19776,Primed-enhancers_Liver_19779,Primed-enhancers_Liver_20904,Primed-enhancers_Liver_22993,Primed-enhancers_Liver_2995,Primed-enhancers_Liver_3002,Primed-enhancers_Liver_3012,Primed-enhancers_Liver_3020,Primed-enhancers_Liver_33969,Primed-enhancers_Liver_33980,Primed-enhancers_Liver_339…
GO:0043954	cellular component maintenance	1.88665	40	21.2016	0.00723	2.13412	17	7.96581	0.0254	Abl2,Adgrb3,Afdn,App,Cadm1,Cntnap2,Cttn,Epb41l3,Igf1r,Itga3,Lnpk,Ophn1,Plekha7,Shank2,Syngap1,Tanc1,Tjp1	ENSFDAG00000000093,ENSFDAG00000000362,ENSFDAG00000006381,ENSFDAG00000008214,ENSFDAG00000009429,ENSFDAG00000011943,ENSFDAG00000012415,ENSFDAG00000013037,ENSFDAG00000013391,ENSFDAG00000015077,ENSFDAG00000016072,ENSFDAG00000017270,ENSFDAG00000018168,ENSFDAG00000018360,ENSFDAG00000018450,ENSFDAG00000019409,ENSFDAG00000020446	Primed-enhancers_Liver_12439,Primed-enhancers_Liver_12443,Primed-enhancers_Liver_30110,Primed-enhancers_Liver_30127,Primed-enhancers_Liver_30128,Primed-enhancers_Liver_31150,Primed-enhancers_Liver_31151,Primed-enhancers_Liver_31504,Primed-enhancers_Liver_32895,Primed-enhancers_Liver_3976,Primed-enhancers_Liver_41083,Primed-enhancers_Liver_41084,Primed-enhancers_Liver_41087,Primed-enhancers_Liver_…
GO:0048565	digestive tract development	2.08683	30	14.3759	0.00732	3.19127	14	4.38697	0.00184	Dicer1,Fat4,Fgf10,Fgfr2,Gli2,Gli3,Hrh2,Nkx2-3,Pcsk5,Pdgfa,Pdx1,Rarb,Rarres2,Wnt5a	ENSFDAG00000005890,ENSFDAG00000006096,ENSFDAG00000006541,ENSFDAG00000012390,ENSFDAG00000012545,ENSFDAG00000014474,ENSFDAG00000014584,ENSFDAG00000015179,ENSFDAG00000017546,ENSFDAG00000017616,ENSFDAG00000018458,ENSFDAG00000018863,ENSFDAG00000020454,ENSFDAG00000021287	Primed-enhancers_Liver_17039,Primed-enhancers_Liver_17758,Primed-enhancers_Liver_17763,Primed-enhancers_Liver_19018,Primed-enhancers_Liver_20961,Primed-enhancers_Liver_20962,Primed-enhancers_Liver_20965,Primed-enhancers_Liver_20966,Primed-enhancers_Liver_20967,Primed-enhancers_Liver_21294,Primed-enhancers_Liver_21297,Primed-enhancers_Liver_21300,Primed-enhancers_Liver_21304,Primed-enhancers_Liver…
GO:0002521	leukocyte differentiation	1.36124	143	105.052	0.00745	1.39501	86	61.6485	0.0149	Abl2,Ahr,Ap3b1,Arid1a,Arid1b,Arid2,Asxl2,Atp11c,Batf2,Bcl11a,Blk,Bmp4,Braf,Calcr,Ccl19,Ccr6,Ccr7,Cd44,Chd7,Csf3,Ctnnb1,Cyp26b1,Dicer1,Dlk1,Dll1,Dnajb9,Dock10,Dock11,Drosha,Farp2,Foxp1,Fshr,Fzd8,Fzd9,Gli3,Gpc3,Gpr68,Hdac7,Hdac9,Hectd1,Hmgb1,Ifng,Itgb6,Itgb8,Itpkb,Lep,Lyl1,Myc,Nkx2-3,Onecut1,Patz1,Pik3r1,Plcb1,Plcl2,Pou1f1,Pparg,Ppargc1b,Ppp3ca,Prex1,Psen1,Ripk2,Rora,Rorc,Runx1,Satb1,Sh3rf1,Smad7,S…	ENSFDAG00000000334,ENSFDAG00000000528,ENSFDAG00000001807,ENSFDAG00000002748,ENSFDAG00000003104,ENSFDAG00000004101,ENSFDAG00000004743,ENSFDAG00000004839,ENSFDAG00000005217,ENSFDAG00000005395,ENSFDAG00000005504,ENSFDAG00000005614,ENSFDAG00000005741,ENSFDAG00000006063,ENSFDAG00000006377,ENSFDAG00000006438,ENSFDAG00000006493,ENSFDAG00000006824,ENSFDAG00000007522,ENSFDAG00000007714,ENSFDAG00000008006,…	Primed-enhancers_Liver_12720,Primed-enhancers_Liver_12754,Primed-enhancers_Liver_14034,Primed-enhancers_Liver_14718,Primed-enhancers_Liver_14722,Primed-enhancers_Liver_14726,Primed-enhancers_Liver_14771,Primed-enhancers_Liver_15014,Primed-enhancers_Liver_15149,Primed-enhancers_Liver_16024,Primed-enhancers_Liver_16027,Primed-enhancers_Liver_16028,Primed-enhancers_Liver_16029,Primed-enhancers_Liver…
GO:0070166	enamel mineralization	3.21875	13	4.03883	0.008	4.33101	10	2.30893	0.00118	Cftr,Dicer1,Enam,Fam20c,Itgb6,Nectin1,Stim1,Tcirg1,Tgfb1,Wdr72	ENSFDAG00000005574,ENSFDAG00000006573,ENSFDAG00000007616,ENSFDAG00000007714,ENSFDAG00000008083,ENSFDAG00000010907,ENSFDAG00000012995,ENSFDAG00000015203,ENSFDAG00000018300,ENSFDAG00000021287	Primed-enhancers_Liver_17039,Primed-enhancers_Liver_36648,Primed-enhancers_Liver_41167,Primed-enhancers_Liver_56400,Primed-enhancers_Liver_58257,Primed-enhancers_Liver_59223,Primed-enhancers_Liver_59225,Primed-enhancers_Liver_63848,Primed-enhancers_Liver_65865,Primed-enhancers_Liver_65868,Primed-enhancers_Liver_72407,Primed-enhancers_Liver_72420,Primed-enhancers_Liver_74063
GO:0045444	fat cell differentiation	1.47827	93	62.9113	0.00805	1.67417	46	27.4763	0.00723	Arntl,Arxes2,Asxl1,Asxl2,Bmp2,Ccnd1,Cds1,Cntnap2,Creb5,Dact1,Dlk1,Eif2ak3,Fgf10,Fndc3b,Fto,Gdf10,Igf1,Klf4,Klf5,Lep,Lrp5,Mettl8,Mkx,Nudt7,Plcb1,Ppard,Pparg,Rarres2,Rora,Rorc,Runx1t1,Sh2b2,Sh3pxd2b,Smad3,Socs7,Stk3,Tgfb1,Trio,Vegfa,Wnt10b,Wnt5a,Wwtr1,Zbtb16,Zbtb7c,Zfp36l1,Zfp516	ENSFDAG00000001331,ENSFDAG00000001807,ENSFDAG00000002748,ENSFDAG00000004743,ENSFDAG00000005173,ENSFDAG00000005395,ENSFDAG00000005632,ENSFDAG00000005695,ENSFDAG00000005761,ENSFDAG00000005890,ENSFDAG00000006183,ENSFDAG00000007343,ENSFDAG00000007370,ENSFDAG00000008006,ENSFDAG00000008083,ENSFDAG00000008670,ENSFDAG00000008859,ENSFDAG00000010014,ENSFDAG00000010527,ENSFDAG00000010886,ENSFDAG00000010914,…	Primed-enhancers_Liver_12616,Primed-enhancers_Liver_14034,Primed-enhancers_Liver_15615,Primed-enhancers_Liver_16024,Primed-enhancers_Liver_16027,Primed-enhancers_Liver_16028,Primed-enhancers_Liver_16029,Primed-enhancers_Liver_16036,Primed-enhancers_Liver_17189,Primed-enhancers_Liver_20961,Primed-enhancers_Liver_20962,Primed-enhancers_Liver_20965,Primed-enhancers_Liver_20966,Primed-enhancers_Liver…
GO:1905203	regulation of connective tissue replacement	3.64749	11	3.01577	0.00811	7.57926	7	0.923573	0.00015	Abi3bp,Gata4,Klf6,Pparg,Ppp3ca,Rock1,Rock2	ENSFDAG00000004743,ENSFDAG00000005671,ENSFDAG00000012484,ENSFDAG00000012934,ENSFDAG00000017042,ENSFDAG00000018891,ENSFDAG00000019290	Primed-enhancers_Liver_14369,Primed-enhancers_Liver_17577,Primed-enhancers_Liver_22974,Primed-enhancers_Liver_29600,Primed-enhancers_Liver_33969,Primed-enhancers_Liver_33980,Primed-enhancers_Liver_33981,Primed-enhancers_Liver_33986,Primed-enhancers_Liver_48967,Primed-enhancers_Liver_49002,Primed-enhancers_Liver_62303
GO:0034505	tooth mineralization	2.4537	20	8.15096	0.00818	4.06032	15	3.69429	8.84e-05	Ank,Bcor,Cftr,Col1a1,Dicer1,Enam,Fam20c,Fgfr1,Itgb6,Nectin1,Stim1,Tcirg1,Tgfb1,Wdr72,Wnt6	ENSFDAG00000002080,ENSFDAG00000003009,ENSFDAG00000004129,ENSFDAG00000005574,ENSFDAG00000006573,ENSFDAG00000007616,ENSFDAG00000007714,ENSFDAG00000008083,ENSFDAG00000010907,ENSFDAG00000012995,ENSFDAG00000015203,ENSFDAG00000015976,ENSFDAG00000018300,ENSFDAG00000019082,ENSFDAG00000021287	Primed-enhancers_Liver_12421,Primed-enhancers_Liver_17039,Primed-enhancers_Liver_1756,Primed-enhancers_Liver_25011,Primed-enhancers_Liver_36648,Primed-enhancers_Liver_41167,Primed-enhancers_Liver_56400,Primed-enhancers_Liver_58257,Primed-enhancers_Liver_59223,Primed-enhancers_Liver_59225,Primed-enhancers_Liver_63848,Primed-enhancers_Liver_65865,Primed-enhancers_Liver_65868,Primed-enhancers_Liver_…
GO:2001241	positive regulation of extrinsic apoptotic signaling pathway in absence of ligand	2.90496	15	5.16359	0.00818	3.46481	6	1.7317	0.047	Ctnna1,Inhba,Ppp2r1a,Ppp2r1b,Tgfb2,Wwox	ENSFDAG00000001511,ENSFDAG00000009628,ENSFDAG00000010876,ENSFDAG00000012001,ENSFDAG00000012435,ENSFDAG00000021196	Primed-enhancers_Liver_17763,Primed-enhancers_Liver_17781,Primed-enhancers_Liver_17791,Primed-enhancers_Liver_17804,Primed-enhancers_Liver_17806,Primed-enhancers_Liver_34608,Primed-enhancers_Liver_473,Primed-enhancers_Liver_5068,Primed-enhancers_Liver_5069,Primed-enhancers_Liver_5090,Primed-enhancers_Liver_70602,Primed-enhancers_Liver_70603,Primed-enhancers_Liver_70606,Primed-enhancers_Liver_7285…
GO:2000095	regulation of Wnt signaling pathway, planar cell polarity pathway	3.20542	13	4.05564	0.00818	3.46481	6	1.7317	0.047	Abl2,Dab2,Dact1,Gpc3,Mllt3,Znrf3	ENSFDAG00000006183,ENSFDAG00000008214,ENSFDAG00000010372,ENSFDAG00000010794,ENSFDAG00000019133,ENSFDAG00000021297	Primed-enhancers_Liver_15615,Primed-enhancers_Liver_24601,Primed-enhancers_Liver_3976,Primed-enhancers_Liver_51665,Primed-enhancers_Liver_51682,Primed-enhancers_Liver_76389,Primed-enhancers_Liver_76400,Primed-enhancers_Liver_76404,Primed-enhancers_Liver_76405,Primed-enhancers_Liver_9289,Primed-enhancers_Liver_9293,Primed-enhancers_Liver_9309,Primed-enhancers_Liver_9315
GO:0110148	biomineralization	1.5845	67	42.2846	0.00835	2.15238	41	19.0487	0.000115	Acvr1,Acvr2a,Ank,Ano6,Asxl2,Bcor,Bmp2,Bmp2k,Bmp4,Cftr,Col1a1,Dicer1,Dlk1,Eif2ak3,Enam,Fam20c,Fgfr1,Fgfr2,Fzd9,Gja6,Gpc3,Igf1,Itgb6,Lep,Nectin1,Nt5e,Phex,Ptn,Rspo2,Slc24a3,Smad3,Sox9,Stim1,Tcirg1,Tent5a,Tgfb1,Tmem38b,Vdr,Wdr72,Wnt10b,Wnt6	ENSFDAG00000001117,ENSFDAG00000002080,ENSFDAG00000003009,ENSFDAG00000003226,ENSFDAG00000004129,ENSFDAG00000004447,ENSFDAG00000005565,ENSFDAG00000005574,ENSFDAG00000006573,ENSFDAG00000007195,ENSFDAG00000007477,ENSFDAG00000007616,ENSFDAG00000007714,ENSFDAG00000008083,ENSFDAG00000008174,ENSFDAG00000008670,ENSFDAG00000009044,ENSFDAG00000009326,ENSFDAG00000010160,ENSFDAG00000010527,ENSFDAG00000010907,…	Primed-enhancers_Liver_12421,Primed-enhancers_Liver_13448,Primed-enhancers_Liver_13470,Primed-enhancers_Liver_14034,Primed-enhancers_Liver_17039,Primed-enhancers_Liver_17189,Primed-enhancers_Liver_1756,Primed-enhancers_Liver_22351,Primed-enhancers_Liver_22352,Primed-enhancers_Liver_25011,Primed-enhancers_Liver_25491,Primed-enhancers_Liver_27294,Primed-enhancers_Liver_27295,Primed-enhancers_Liver_…
GO:0045661	regulation of myoblast differentiation	1.80691	42	23.2441	0.00887	2.11514	21	9.92841	0.0127	Arid1a,Arid1b,Arid2,Bmp4,Ccl17,Cdon,Cxcl14,Dll1,Dpf3,Map3k5,Mkx,Pik3r1,Plcb1,Ppard,Smarca2,Smarce1,Sox9,Tgfb1,Xkr8,Zfhx3,Zfp36l1	ENSFDAG00000000334,ENSFDAG00000003960,ENSFDAG00000005761,ENSFDAG00000006438,ENSFDAG00000007610,ENSFDAG00000007850,ENSFDAG00000008083,ENSFDAG00000008095,ENSFDAG00000008341,ENSFDAG00000009044,ENSFDAG00000010014,ENSFDAG00000010114,ENSFDAG00000010502,ENSFDAG00000012886,ENSFDAG00000014165,ENSFDAG00000014938,ENSFDAG00000015740,ENSFDAG00000015753,ENSFDAG00000016266,ENSFDAG00000016918,ENSFDAG00000017230	Primed-enhancers_Liver_12754,Primed-enhancers_Liver_13448,Primed-enhancers_Liver_13470,Primed-enhancers_Liver_16024,Primed-enhancers_Liver_16027,Primed-enhancers_Liver_16028,Primed-enhancers_Liver_16029,Primed-enhancers_Liver_16036,Primed-enhancers_Liver_16253,Primed-enhancers_Liver_16255,Primed-enhancers_Liver_16256,Primed-enhancers_Liver_16290,Primed-enhancers_Liver_16297,Primed-enhancers_Liver…
GO:1904000	positive regulation of eating behavior	4.76855	8	1.67766	0.00915	6.92961	4	0.577233	0.0149	Ghsr,Npy,Oprk1,Sgip1	ENSFDAG00000003429,ENSFDAG00000006229,ENSFDAG00000009440,ENSFDAG00000019741	Primed-enhancers_Liver_45793,Primed-enhancers_Liver_45803,Primed-enhancers_Liver_45814,Primed-enhancers_Liver_45831,Primed-enhancers_Liver_47,Primed-enhancers_Liver_48,Primed-enhancers_Liver_52064,Primed-enhancers_Liver_60216
GO:0060561	apoptotic process involved in morphogenesis	2.98653	14	4.68771	0.00944	2.88734	9	3.11706	0.0312	Bcl2l11,Hand2,Lrp5,Pax8,Pml,Ppp2r1b,Tgfb2,Tnfrsf1b,Vdr	ENSFDAG00000005748,ENSFDAG00000007598,ENSFDAG00000009326,ENSFDAG00000009453,ENSFDAG00000009628,ENSFDAG00000011119,ENSFDAG00000011238,ENSFDAG00000012435,ENSFDAG00000018757	Primed-enhancers_Liver_27401,Primed-enhancers_Liver_27407,Primed-enhancers_Liver_27408,Primed-enhancers_Liver_36630,Primed-enhancers_Liver_39743,Primed-enhancers_Liver_43254,Primed-enhancers_Liver_5068,Primed-enhancers_Liver_5069,Primed-enhancers_Liver_5090,Primed-enhancers_Liver_53938,Primed-enhancers_Liver_68791,Primed-enhancers_Liver_72858,Primed-enhancers_Liver_72859,Primed-enhancers_Liver_73…
GO:0046883	regulation of hormone secretion	1.45198	98	67.4938	0.00946	1.68428	56	33.2486	0.00222	Abat,Acvr1c,Acvr2a,Adcy8,Ano1,Arntl,BC048507,Blk,C1qtnf3,Cask,Cftr,Chd7,Cry1,Dab2,Efna5,Fgfr1,Gal,Ghsr,Gipr,Gja6,Glul,Gpr68,Hmgcr,Hnf1a,Ifng,Inhba,Inhbb,Irs1,Isl1,Jak2,Klf7,Lep,Lrp5,Mtnr1a,Mtnr1b,Npvf,Nrg1,Oprk1,P2ry1,Pax8,Pde3b,Pde8b,Pdx1,Pex5l,Ppard,Pparg,Ppp3ca,Prkce,Rfx3,Runx1,Serp1,Sybu,Tbc1d1,Tcirg1,Tnfsf11,Vdr	ENSFDAG00000000130,ENSFDAG00000000528,ENSFDAG00000001117,ENSFDAG00000002080,ENSFDAG00000002233,ENSFDAG00000002995,ENSFDAG00000003167,ENSFDAG00000003809,ENSFDAG00000004453,ENSFDAG00000004743,ENSFDAG00000005202,ENSFDAG00000005695,ENSFDAG00000005761,ENSFDAG00000006049,ENSFDAG00000006229,ENSFDAG00000007068,ENSFDAG00000007389,ENSFDAG00000007436,ENSFDAG00000007616,ENSFDAG00000008011,ENSFDAG00000008823,…	Primed-enhancers_Liver_1400,Primed-enhancers_Liver_1404,Primed-enhancers_Liver_1407,Primed-enhancers_Liver_16881,Primed-enhancers_Liver_16886,Primed-enhancers_Liver_17039,Primed-enhancers_Liver_17763,Primed-enhancers_Liver_17781,Primed-enhancers_Liver_17791,Primed-enhancers_Liver_17804,Primed-enhancers_Liver_17806,Primed-enhancers_Liver_2001,Primed-enhancers_Liver_20019,Primed-enhancers_Liver_200…
GO:0022603	regulation of anatomical structure morphogenesis	1.22106	283	231.767	0.00947	1.66436	181	108.751	1.57e-09	Abl2,Actr3,Adamts9,Add1,Adgrb1,Adgrb3,Afdn,Aggf1,Ago2,Aqp1,Ar,Arap1,Arhgap35,Bcar1,Bcl11a,Bmp2,Bmp4,Braf,Capzb,Cask,Cd44,Cd59b,Cdh2,Cdkl5,Cfdp1,Chn1,Chrnb2,Clasp1,Crb2,Ctnnb1,Cux1,Cxcl12,Cxcr2,Dab2,Dab2ip,Dact1,Ddhd1,Dicer1,Disc1,Dlc1,Dlg1,Dll1,Dmrt2,Dnmbp,Dpysl5,Dtnbp1,Efna5,Enam,Epb41,Epb41l2,Epb41l3,Epha4,Ephb3,Eps8,Esr1,Ets1,Etv5,Fam171a1,Fbxw8,Fgf10,Fgf3,Fgfr1,Fgfr2,Fmnl2,Fmnl3,Foxp1,Fzd6,Ga…	ENSFDAG00000000042,ENSFDAG00000000501,ENSFDAG00000000579,ENSFDAG00000000589,ENSFDAG00000000859,ENSFDAG00000001188,ENSFDAG00000002080,ENSFDAG00000002280,ENSFDAG00000002693,ENSFDAG00000002748,ENSFDAG00000002987,ENSFDAG00000002990,ENSFDAG00000003104,ENSFDAG00000003292,ENSFDAG00000003357,ENSFDAG00000003760,ENSFDAG00000003809,ENSFDAG00000003824,ENSFDAG00000004569,ENSFDAG00000004696,ENSFDAG00000004743,…	Primed-enhancers_Liver_1018,Primed-enhancers_Liver_10617,Primed-enhancers_Liver_11051,Primed-enhancers_Liver_11069,Primed-enhancers_Liver_11083,Primed-enhancers_Liver_12644,Primed-enhancers_Liver_12958,Primed-enhancers_Liver_13020,Primed-enhancers_Liver_13448,Primed-enhancers_Liver_13470,Primed-enhancers_Liver_14098,Primed-enhancers_Liver_14102,Primed-enhancers_Liver_14369,Primed-enhancers_Liver_…
GO:0001837	epithelial to mesenchymal transition	1.56448	68	43.465	0.00967	2.28925	37	16.1625	9.59e-05	Acvr1,Bmp2,Bmp4,Chrd,Clasp1,Col1a1,Crb2,Ctnnb1,Dab2,Dab2ip,Ddx17,Dlg5,Epha4,Fgfr1,Fgfr2,Gja6,Isl1,Kbtbd8,Pawr,Ppp2ca,Ppp2ca,Pten,Rock1,Rock2,Smad2,Smad3,Smad7,Sox9,Spry2,Tgfb1,Tgfb2,Tgfb3,Vegfa,Wnt16,Wnt2,Wnt5a,Wwtr1	ENSFDAG00000000042,ENSFDAG00000000810,ENSFDAG00000002080,ENSFDAG00000002748,ENSFDAG00000002894,ENSFDAG00000003999,ENSFDAG00000004129,ENSFDAG00000004696,ENSFDAG00000005890,ENSFDAG00000005951,ENSFDAG00000006049,ENSFDAG00000007195,ENSFDAG00000007215,ENSFDAG00000007271,ENSFDAG00000007737,ENSFDAG00000008083,ENSFDAG00000009044,ENSFDAG00000009384,ENSFDAG00000009967,ENSFDAG00000010372,ENSFDAG00000010481,…	Primed-enhancers_Liver_10472,Primed-enhancers_Liver_12421,Primed-enhancers_Liver_13448,Primed-enhancers_Liver_13470,Primed-enhancers_Liver_14369,Primed-enhancers_Liver_16500,Primed-enhancers_Liver_1864,Primed-enhancers_Liver_1865,Primed-enhancers_Liver_1873,Primed-enhancers_Liver_20931,Primed-enhancers_Liver_21693,Primed-enhancers_Liver_21917,Primed-enhancers_Liver_22351,Primed-enhancers_Liver_22…
GO:1902806	regulation of cell cycle G1/S phase transition	1.59781	64	40.0548	0.00979	1.60059	34	21.2422	0.0411	Acvr1,Arid1a,Arid1b,Arid2,Ccnd1,Ccnh,Cdkn2b,Cpsf3,Crebbp,Ctdspl,Dact1,Dcun1d3,Ddx3x,Dlg1,Dpf3,Fgf10,Fhl1,Inhba,Jade1,Klf4,Mn1,Mnat1,Muc1,Plcb1,Pml,Ppp2ca,Ppp2ca,Ppp2r5c,Pten,Rdx,Rrm1,Smarca2,Smarce1,Ube2e2	ENSFDAG00000000334,ENSFDAG00000003637,ENSFDAG00000004395,ENSFDAG00000004696,ENSFDAG00000005436,ENSFDAG00000005876,ENSFDAG00000005951,ENSFDAG00000006183,ENSFDAG00000006317,ENSFDAG00000006438,ENSFDAG00000007182,ENSFDAG00000007195,ENSFDAG00000007707,ENSFDAG00000007850,ENSFDAG00000008341,ENSFDAG00000010071,ENSFDAG00000010481,ENSFDAG00000010502,ENSFDAG00000010598,ENSFDAG00000010886,ENSFDAG00000010914,…	Primed-enhancers_Liver_10472,Primed-enhancers_Liver_12754,Primed-enhancers_Liver_14426,Primed-enhancers_Liver_15615,Primed-enhancers_Liver_15721,Primed-enhancers_Liver_16253,Primed-enhancers_Liver_16255,Primed-enhancers_Liver_16256,Primed-enhancers_Liver_16290,Primed-enhancers_Liver_16297,Primed-enhancers_Liver_17207,Primed-enhancers_Liver_17763,Primed-enhancers_Liver_17781,Primed-enhancers_Liver…
GO:0000082	G1/S transition of mitotic cell cycle	1.56663	69	44.0435	0.00997	1.67382	40	23.8974	0.0138	Acvr1,Arid1a,Arid1b,Arid2,Cables1,Ccnd1,Ccnh,Cdkn2b,Cpsf3,Crebbp,Ctdspl,Dact1,Dcun1d3,Ddx3x,Dlg1,Dpf3,Fgf10,Fhl1,Inhba,Jade1,Klf4,Lats1,Mnat1,Muc1,Myc,Plcb1,Pml,Ppp2ca,Ppp2ca,Ppp2r5c,Ppp3ca,Pten,Rbbp8,Rdx,Rrm1,Smarca2,Smarce1,Ube2e2,Usp26,Usp37	ENSFDAG00000000334,ENSFDAG00000003637,ENSFDAG00000004395,ENSFDAG00000004696,ENSFDAG00000004839,ENSFDAG00000004972,ENSFDAG00000005436,ENSFDAG00000005951,ENSFDAG00000006183,ENSFDAG00000006317,ENSFDAG00000006438,ENSFDAG00000007182,ENSFDAG00000007195,ENSFDAG00000007707,ENSFDAG00000007850,ENSFDAG00000008341,ENSFDAG00000010071,ENSFDAG00000010140,ENSFDAG00000010481,ENSFDAG00000010502,ENSFDAG00000010598,…	Primed-enhancers_Liver_10472,Primed-enhancers_Liver_12754,Primed-enhancers_Liver_14426,Primed-enhancers_Liver_15615,Primed-enhancers_Liver_15721,Primed-enhancers_Liver_16253,Primed-enhancers_Liver_16255,Primed-enhancers_Liver_16256,Primed-enhancers_Liver_16290,Primed-enhancers_Liver_16297,Primed-enhancers_Liver_17207,Primed-enhancers_Liver_1740,Primed-enhancers_Liver_17763,Primed-enhancers_Liver_…
GO:1901615	organic hydroxy compound metabolic process	1.3734	128	93.1991	0.00998	1.37134	79	57.6078	0.0288	Abat,Abca1,Abcd3,Acadl,Acpp,Adh6a,Aplp2,App,Asah2,Bmp2,Btbd9,Cacna1h,Cbr4,Cftr,Chka,Chrnb2,Clcn2,Cpq,Cyp11a1,Cyp26a1,Cyp26b1,Cyp2r1,Cyp4f18,Dab2,Dao,Dpm1,Drd4,Epas1,Erlin2,Fech,Fev,Fgfr1,Got1,Grin2a,Hao1,Hmgcr,Hnf1a,Hprt,Idh3b,Ifng,Itpkb,Iyd,Kcnj6,Kcnma1,Ldha,Ldhd,Lep,Lhcgr,Lima1,Lipe,Lrp5,Myof,Npy,Nudt4,P2ry1,Pax8,Plb1,Plcb1,Plek,Plpp1,Plpp3,Pou1f1,Ppip5k2,Pten,Rnls,Sc5d,Sec14l2,Sgpp2,Slc16a2,Sl…	ENSFDAG00000001783,ENSFDAG00000001888,ENSFDAG00000002016,ENSFDAG00000002080,ENSFDAG00000003152,ENSFDAG00000003809,ENSFDAG00000004480,ENSFDAG00000004696,ENSFDAG00000005827,ENSFDAG00000005890,ENSFDAG00000005984,ENSFDAG00000006108,ENSFDAG00000007068,ENSFDAG00000007348,ENSFDAG00000007524,ENSFDAG00000007605,ENSFDAG00000007616,ENSFDAG00000007921,ENSFDAG00000007952,ENSFDAG00000008207,ENSFDAG00000008332,…	Primed-enhancers_Liver_1407,Primed-enhancers_Liver_1488,Primed-enhancers_Liver_1490,Primed-enhancers_Liver_1770,Primed-enhancers_Liver_1891,Primed-enhancers_Liver_20094,Primed-enhancers_Liver_20379,Primed-enhancers_Liver_20391,Primed-enhancers_Liver_20806,Primed-enhancers_Liver_21312,Primed-enhancers_Liver_21317,Primed-enhancers_Liver_21346,Primed-enhancers_Liver_21350,Primed-enhancers_Liver_2138…
GO:0000165	MAPK cascade	1.25928	219	173.909	0.0111	1.54303	132	85.5459	2.87e-05	Abl2,Ace2,Ackr3,Angpt1,Apip,App,Ar,Atp6ap2,Bank1,Bmp2,Bmp4,Braf,C1qtnf3,Calcr,Ccl17,Ccl19,Ccr7,Cd44,Cdh2,Cdon,Cnksr3,Cntnap2,Ctnnb1,Cxcl12,Dab2,Dab2ip,Dact1,Dlg1,Drd4,Dusp26,Dusp27,Dusp4,Dusp9,Epgn,Epha4,Ephb1,Esr1,Fgf10,Fgf14,Fgfr1,Fgfr2,Fshr,Fzd8,Gab1,Garem1,Gata4,Gm28047,Grik2,Hacd3,Hand2,Hipk2,Hmgb1,Hmgcr,Igf1,Igf1r,Itpkb,Jak2,Klb,Klf4,Lep,Map2k5,Map2k6,Map3k1,Map3k13,Map3k15,Map3k5,Map3k6,Ma…	ENSFDAG00000000130,ENSFDAG00000000501,ENSFDAG00000000810,ENSFDAG00000001180,ENSFDAG00000002080,ENSFDAG00000002571,ENSFDAG00000002702,ENSFDAG00000002748,ENSFDAG00000003809,ENSFDAG00000003960,ENSFDAG00000004696,ENSFDAG00000004743,ENSFDAG00000004839,ENSFDAG00000005166,ENSFDAG00000005217,ENSFDAG00000005242,ENSFDAG00000005440,ENSFDAG00000005504,ENSFDAG00000005537,ENSFDAG00000005581,ENSFDAG00000005671,…	Primed-enhancers_Liver_11083,Primed-enhancers_Liver_11446,Primed-enhancers_Liver_12365,Primed-enhancers_Liver_12754,Primed-enhancers_Liver_13389,Primed-enhancers_Liver_13390,Primed-enhancers_Liver_13392,Primed-enhancers_Liver_13448,Primed-enhancers_Liver_13470,Primed-enhancers_Liver_14369,Primed-enhancers_Liver_14627,Primed-enhancers_Liver_15615,Primed-enhancers_Liver_16024,Primed-enhancers_Liver…
GO:0048818	positive regulation of hair follicle maturation	4.5663	8	1.75197	0.0112	6.92961	4	0.577233	0.0149	Gal,Tgfb2,Wnt10b,Wnt5a	ENSFDAG00000005890,ENSFDAG00000012435,ENSFDAG00000017359,ENSFDAG00000019148	Primed-enhancers_Liver_21917,Primed-enhancers_Liver_27436,Primed-enhancers_Liver_36600,Primed-enhancers_Liver_36601,Primed-enhancers_Liver_36603,Primed-enhancers_Liver_5068,Primed-enhancers_Liver_5069,Primed-enhancers_Liver_5090
GO:0090101	negative regulation of transmembrane receptor protein serine/threonine kinase signaling pathway	1.67458	51	30.4554	0.0113	1.74533	27	15.4698	0.0334	Acvr1,Bmp2,Chrd,Crim1,Ctdspl2,Dact2,Dlx1,Hipk2,Magi2,Onecut1,Onecut2,Pparg,Ppm1a,Rasl11b,Sap30,Sin3a,Skor1,Skor2,Smad7,Sorl1,Spry2,Strap,Suds3,Tgfb3,Vwc2l,Wfikkn2,Wnt5a	ENSFDAG00000000501,ENSFDAG00000000810,ENSFDAG00000003278,ENSFDAG00000004399,ENSFDAG00000004743,ENSFDAG00000005890,ENSFDAG00000007193,ENSFDAG00000007195,ENSFDAG00000010997,ENSFDAG00000011655,ENSFDAG00000012059,ENSFDAG00000012253,ENSFDAG00000012332,ENSFDAG00000013313,ENSFDAG00000014292,ENSFDAG00000014957,ENSFDAG00000015852,ENSFDAG00000016915,ENSFDAG00000017227,ENSFDAG00000017680,ENSFDAG00000017883,…	Primed-enhancers_Liver_12365,Primed-enhancers_Liver_12381,Primed-enhancers_Liver_1564,Primed-enhancers_Liver_15680,Primed-enhancers_Liver_16500,Primed-enhancers_Liver_21917,Primed-enhancers_Liver_24109,Primed-enhancers_Liver_24110,Primed-enhancers_Liver_28400,Primed-enhancers_Liver_31168,Primed-enhancers_Liver_31170,Primed-enhancers_Liver_33185,Primed-enhancers_Liver_35766,Primed-enhancers_Liver_…
GO:0042475	odontogenesis of dentin-containing tooth	1.87523	36	19.1977	0.0114	2.1655	20	9.23573	0.0124	Acvr2a,Bcl2l11,Bmp2,Bmp4,Cftr,Ctnnb1,Dicer1,Dll1,Dlx1,Dlx3,Enam,Fam20c,Fgf10,Gli2,Gli3,Hand2,Nkx2-3,Rspo2,Wnt10a,Wnt6	ENSFDAG00000001117,ENSFDAG00000005748,ENSFDAG00000006573,ENSFDAG00000007616,ENSFDAG00000009044,ENSFDAG00000009384,ENSFDAG00000009453,ENSFDAG00000010263,ENSFDAG00000010907,ENSFDAG00000011655,ENSFDAG00000012545,ENSFDAG00000014165,ENSFDAG00000015976,ENSFDAG00000017546,ENSFDAG00000017616,ENSFDAG00000017927,ENSFDAG00000018863,ENSFDAG00000020762,ENSFDAG00000020944,ENSFDAG00000021287	Primed-enhancers_Liver_12443,Primed-enhancers_Liver_17039,Primed-enhancers_Liver_1756,Primed-enhancers_Liver_17758,Primed-enhancers_Liver_17763,Primed-enhancers_Liver_20961,Primed-enhancers_Liver_20962,Primed-enhancers_Liver_20965,Primed-enhancers_Liver_20966,Primed-enhancers_Liver_20967,Primed-enhancers_Liver_22351,Primed-enhancers_Liver_22352,Primed-enhancers_Liver_25491,Primed-enhancers_Liver_…
GO:0031214	biomineral tissue development	1.57225	65	41.3421	0.0115	2.20688	40	18.1251	9.59e-05	Acvr1,Acvr2a,Ank,Ano6,Asxl2,Bcor,Bmp2,Bmp2k,Bmp4,Cftr,Col1a1,Dicer1,Dlk1,Eif2ak3,Enam,Fam20c,Fgfr1,Fgfr2,Fzd9,Gja6,Gpc3,Igf1,Itgb6,Lep,Nectin1,Phex,Ptn,Rspo2,Slc24a3,Smad3,Sox9,Stim1,Tcirg1,Tent5a,Tgfb1,Tmem38b,Vdr,Wdr72,Wnt10b,Wnt6	ENSFDAG00000001117,ENSFDAG00000002080,ENSFDAG00000003009,ENSFDAG00000003226,ENSFDAG00000004129,ENSFDAG00000004447,ENSFDAG00000005565,ENSFDAG00000005574,ENSFDAG00000006573,ENSFDAG00000007195,ENSFDAG00000007477,ENSFDAG00000007616,ENSFDAG00000007714,ENSFDAG00000008083,ENSFDAG00000008174,ENSFDAG00000008670,ENSFDAG00000009044,ENSFDAG00000009326,ENSFDAG00000010527,ENSFDAG00000010907,ENSFDAG00000011655,…	Primed-enhancers_Liver_12421,Primed-enhancers_Liver_13448,Primed-enhancers_Liver_13470,Primed-enhancers_Liver_14034,Primed-enhancers_Liver_17039,Primed-enhancers_Liver_17189,Primed-enhancers_Liver_1756,Primed-enhancers_Liver_22351,Primed-enhancers_Liver_22352,Primed-enhancers_Liver_25011,Primed-enhancers_Liver_25491,Primed-enhancers_Liver_27294,Primed-enhancers_Liver_27295,Primed-enhancers_Liver_…
GO:0045445	myoblast differentiation	1.68023	52	30.9482	0.0116	2.1655	29	13.3918	0.00168	Arid1a,Arid1b,Arid2,Bcl9,Bmp4,Ccl17,Cdon,Cxcl14,Ddx17,Dicer1,Dll1,Dpf3,Igf1,Isl1,Map3k5,Mbnl1,Mkx,Nrg1,Pik3r1,Plcb1,Ppard,Smarca2,Smarce1,Sox9,Tgfb1,Wnt10b,Xkr8,Zfhx3,Zfp36l1	ENSFDAG00000000334,ENSFDAG00000003960,ENSFDAG00000005761,ENSFDAG00000006049,ENSFDAG00000006438,ENSFDAG00000007610,ENSFDAG00000007850,ENSFDAG00000008083,ENSFDAG00000008095,ENSFDAG00000008341,ENSFDAG00000009044,ENSFDAG00000009967,ENSFDAG00000010014,ENSFDAG00000010114,ENSFDAG00000010502,ENSFDAG00000010527,ENSFDAG00000012639,ENSFDAG00000012886,ENSFDAG00000013427,ENSFDAG00000014165,ENSFDAG00000014938,…	Primed-enhancers_Liver_12754,Primed-enhancers_Liver_13448,Primed-enhancers_Liver_13470,Primed-enhancers_Liver_16024,Primed-enhancers_Liver_16027,Primed-enhancers_Liver_16028,Primed-enhancers_Liver_16029,Primed-enhancers_Liver_16036,Primed-enhancers_Liver_16253,Primed-enhancers_Liver_16255,Primed-enhancers_Liver_16256,Primed-enhancers_Liver_16290,Primed-enhancers_Liver_16297,Primed-enhancers_Liver…
GO:0008045	motor neuron axon guidance	2.09683	26	12.3997	0.0118	2.70688	10	3.69429	0.0312	Alcam,Chn1,Cxcl12,Epha4,Foxp1,Nrp1,Ntn1,Ntn3,Rnf165,Slit2	ENSFDAG00000002280,ENSFDAG00000002693,ENSFDAG00000007737,ENSFDAG00000009167,ENSFDAG00000012354,ENSFDAG00000016796,ENSFDAG00000016928,ENSFDAG00000017908,ENSFDAG00000018078,ENSFDAG00000020807	Primed-enhancers_Liver_11051,Primed-enhancers_Liver_11069,Primed-enhancers_Liver_11083,Primed-enhancers_Liver_1864,Primed-enhancers_Liver_1865,Primed-enhancers_Liver_1873,Primed-enhancers_Liver_29467,Primed-enhancers_Liver_29470,Primed-enhancers_Liver_29520,Primed-enhancers_Liver_31336,Primed-enhancers_Liver_36303,Primed-enhancers_Liver_41731,Primed-enhancers_Liver_55452,Primed-enhancers_Liver_61…
GO:0046887	positive regulation of hormone secretion	1.6603	52	31.3196	0.0122	1.7324	31	17.8942	0.023	Abat,Acvr2a,Adcy8,Ano1,BC048507,Blk,C1qtnf3,Cask,Cftr,Dab2,Fgfr1,Gal,Gipr,Gja6,Glul,Gpr68,Inhbb,Irs1,Isl1,Jak2,P2ry1,Pdx1,Pex5l,Ppard,Pparg,Prkce,Runx1,Serp1,Sybu,Tnfsf11,Vdr	ENSFDAG00000000130,ENSFDAG00000001117,ENSFDAG00000002080,ENSFDAG00000002233,ENSFDAG00000002995,ENSFDAG00000003809,ENSFDAG00000004743,ENSFDAG00000005761,ENSFDAG00000006049,ENSFDAG00000007389,ENSFDAG00000007616,ENSFDAG00000009326,ENSFDAG00000010085,ENSFDAG00000010109,ENSFDAG00000010357,ENSFDAG00000010372,ENSFDAG00000012280,ENSFDAG00000012391,ENSFDAG00000012941,ENSFDAG00000013126,ENSFDAG00000013524,…	Primed-enhancers_Liver_16881,Primed-enhancers_Liver_16886,Primed-enhancers_Liver_17039,Primed-enhancers_Liver_2001,Primed-enhancers_Liver_2013,Primed-enhancers_Liver_20931,Primed-enhancers_Liver_22974,Primed-enhancers_Liver_23645,Primed-enhancers_Liver_23646,Primed-enhancers_Liver_24109,Primed-enhancers_Liver_24110,Primed-enhancers_Liver_24601,Primed-enhancers_Liver_24794,Primed-enhancers_Liver_2…
GO:0010717	regulation of epithelial to mesenchymal transition	1.70088	48	28.2207	0.0124	2.38952	24	10.0439	0.00142	Acvr1,Bmp2,Bmp4,Clasp1,Col1a1,Crb2,Ctnnb1,Dab2,Dab2ip,Epha4,Isl1,Pawr,Ppp2ca,Ppp2ca,Pten,Smad2,Smad3,Smad7,Spry2,Tgfb1,Tgfb2,Tgfb3,Vegfa,Wwtr1	ENSFDAG00000000042,ENSFDAG00000000810,ENSFDAG00000002748,ENSFDAG00000002894,ENSFDAG00000004129,ENSFDAG00000004696,ENSFDAG00000005951,ENSFDAG00000006049,ENSFDAG00000007195,ENSFDAG00000007271,ENSFDAG00000007737,ENSFDAG00000008083,ENSFDAG00000009044,ENSFDAG00000009384,ENSFDAG00000010372,ENSFDAG00000010481,ENSFDAG00000011655,ENSFDAG00000012174,ENSFDAG00000012435,ENSFDAG00000014357,ENSFDAG00000016074,…	Primed-enhancers_Liver_10472,Primed-enhancers_Liver_12421,Primed-enhancers_Liver_16500,Primed-enhancers_Liver_1864,Primed-enhancers_Liver_1865,Primed-enhancers_Liver_1873,Primed-enhancers_Liver_20931,Primed-enhancers_Liver_22351,Primed-enhancers_Liver_22352,Primed-enhancers_Liver_24109,Primed-enhancers_Liver_24110,Primed-enhancers_Liver_24601,Primed-enhancers_Liver_2809,Primed-enhancers_Liver_322…
GO:0045807	positive regulation of endocytosis	1.7693	42	23.7382	0.0124	1.76057	25	14.1999	0.0381	Add1,Angpt1,Ankfy1,Ano6,App,Bin1,Cbl,Cbll1,Ccl19,Ccr7,Dab2,Dll1,Dtnbp1,Gpc3,Itga2,Magi2,Pard3,Pparg,Ppp3ca,Rab31,Sgip1,Snap91,Tbc1d5,Vegfa,Wnt5a	ENSFDAG00000002748,ENSFDAG00000003429,ENSFDAG00000003882,ENSFDAG00000004743,ENSFDAG00000005890,ENSFDAG00000006826,ENSFDAG00000006956,ENSFDAG00000007035,ENSFDAG00000008068,ENSFDAG00000008196,ENSFDAG00000009363,ENSFDAG00000010372,ENSFDAG00000012799,ENSFDAG00000014165,ENSFDAG00000015157,ENSFDAG00000015988,ENSFDAG00000016277,ENSFDAG00000016323,ENSFDAG00000016710,ENSFDAG00000017340,ENSFDAG00000018047,…	Primed-enhancers_Liver_11296,Primed-enhancers_Liver_12754,Primed-enhancers_Liver_14588,Primed-enhancers_Liver_18633,Primed-enhancers_Liver_18634,Primed-enhancers_Liver_20904,Primed-enhancers_Liver_21917,Primed-enhancers_Liver_24601,Primed-enhancers_Liver_25469,Primed-enhancers_Liver_27294,Primed-enhancers_Liver_27295,Primed-enhancers_Liver_30110,Primed-enhancers_Liver_30127,Primed-enhancers_Liver…
GO:0060391	positive regulation of SMAD protein signal transduction	2.98831	13	4.35028	0.0127	3.36856	7	2.07804	0.0337	Bmp2,Bmp4,Dab2,Jak2,Pparg,Tgfb1,Tgfb3	ENSFDAG00000000810,ENSFDAG00000004743,ENSFDAG00000008083,ENSFDAG00000009044,ENSFDAG00000010085,ENSFDAG00000010372,ENSFDAG00000011655	Primed-enhancers_Liver_16500,Primed-enhancers_Liver_22351,Primed-enhancers_Liver_22352,Primed-enhancers_Liver_24601,Primed-enhancers_Liver_37616,Primed-enhancers_Liver_43490,Primed-enhancers_Liver_43508,Primed-enhancers_Liver_43510,Primed-enhancers_Liver_43515,Primed-enhancers_Liver_43519,Primed-enhancers_Liver_43522,Primed-enhancers_Liver_62303,Primed-enhancers_Liver_63848
GO:0002507	tolerance induction	2.53589	17	6.70376	0.0127	3.6647	11	3.00161	0.00252	Blk,Cblb,Ccr7,Cd274,Hmgb1,Icos,Phlpp1,Runx1,Tgfb1,Tnfaip3,Xkr8	ENSFDAG00000007588,ENSFDAG00000008083,ENSFDAG00000009028,ENSFDAG00000009317,ENSFDAG00000011556,ENSFDAG00000011815,ENSFDAG00000012280,ENSFDAG00000013585,ENSFDAG00000015157,ENSFDAG00000016266,ENSFDAG00000019069	Primed-enhancers_Liver_1258,Primed-enhancers_Liver_1261,Primed-enhancers_Liver_12754,Primed-enhancers_Liver_190,Primed-enhancers_Liver_199,Primed-enhancers_Liver_218,Primed-enhancers_Liver_22974,Primed-enhancers_Liver_2732,Primed-enhancers_Liver_29467,Primed-enhancers_Liver_29470,Primed-enhancers_Liver_30407,Primed-enhancers_Liver_37638,Primed-enhancers_Liver_53324,Primed-enhancers_Liver_53325,Pr…
GO:1903844	regulation of cellular response to transforming growth factor beta stimulus	1.70386	46	26.9974	0.0132	1.85142	28	15.1235	0.0158	Bmp2,Cdkn2b,Crebbp,Dab2,Dlx1,Fermt1,Got1,Hipk2,Itga3,Lats1,Npnt,Nrep,Onecut1,Onecut2,Pparg,Ppm1a,Rasl11b,Sap30,Sin3a,Smad2,Smad3,Smad7,Spry2,Strap,Suds3,Tgfb1,Tgfb3,Wfikkn2	ENSFDAG00000000501,ENSFDAG00000000810,ENSFDAG00000002894,ENSFDAG00000003278,ENSFDAG00000004743,ENSFDAG00000007952,ENSFDAG00000008083,ENSFDAG00000008711,ENSFDAG00000010372,ENSFDAG00000010997,ENSFDAG00000011655,ENSFDAG00000011692,ENSFDAG00000012059,ENSFDAG00000012253,ENSFDAG00000013373,ENSFDAG00000014357,ENSFDAG00000014464,ENSFDAG00000014534,ENSFDAG00000014957,ENSFDAG00000015852,ENSFDAG00000016915,…	Primed-enhancers_Liver_12365,Primed-enhancers_Liver_12381,Primed-enhancers_Liver_12439,Primed-enhancers_Liver_12443,Primed-enhancers_Liver_15680,Primed-enhancers_Liver_16500,Primed-enhancers_Liver_24109,Primed-enhancers_Liver_24110,Primed-enhancers_Liver_24601,Primed-enhancers_Liver_27775,Primed-enhancers_Liver_34523,Primed-enhancers_Liver_34524,Primed-enhancers_Liver_35766,Primed-enhancers_Liver…
GO:0030865	cortical cytoskeleton organization	2.20828	22	9.96251	0.0139	2.20221	15	6.81135	0.0306	Dlg1,Epb41,Epb41l1,Epb41l2,Epb41l3,Fmnl2,Fmnl3,Plek,Pls1,Rhobtb1,Rhod,Rnd3,Rock1,Rock2,Vil1	ENSFDAG00000003292,ENSFDAG00000007182,ENSFDAG00000008589,ENSFDAG00000008680,ENSFDAG00000009788,ENSFDAG00000011012,ENSFDAG00000012153,ENSFDAG00000012484,ENSFDAG00000012890,ENSFDAG00000014407,ENSFDAG00000016001,ENSFDAG00000017748,ENSFDAG00000018438,ENSFDAG00000018891,ENSFDAG00000020446	Primed-enhancers_Liver_14369,Primed-enhancers_Liver_1740,Primed-enhancers_Liver_27466,Primed-enhancers_Liver_28757,Primed-enhancers_Liver_32895,Primed-enhancers_Liver_33969,Primed-enhancers_Liver_33980,Primed-enhancers_Liver_33981,Primed-enhancers_Liver_33986,Primed-enhancers_Liver_36683,Primed-enhancers_Liver_40805,Primed-enhancers_Liver_40820,Primed-enhancers_Liver_40821,Primed-enhancers_Liver_…
GO:0030155	regulation of cell adhesion	1.25312	216	172.37	0.0139	1.60934	136	84.5069	3.01e-06	Abat,Abi3bp,Abl2,Adamts18,Afdn,Angpt1,Ank3,Ap3b1,Arid1a,Arid1b,Arid2,Bcar1,Blk,Bmp2,Bmp4,Braf,Capn1,Cask,Cblb,Cbll1,Ccl19,Ccr7,Cd274,Cd44,Cd59b,Cd9,Chrd,Clasp1,Col1a1,Cxcl12,Dab2,Dact2,Dicer1,Disc1,Dlc1,Dlg1,Dlg5,Dll1,Dusp26,Efna5,Efnb1,Egflam,Epha4,Ephb3,Ets1,Fermt1,Gli3,Hmgb1,Hspd1,Icos,Ifng,Igf1,Il6st,Itga2,Itga3,Itpkb,Jak1,Jak2,Klf4,Lamb1,Lep,Magi1,Magi2,Map2k5,Mdga1,Mex3b,Muc1,Myo10,Nck1,Net…	ENSFDAG00000000042,ENSFDAG00000000334,ENSFDAG00000000589,ENSFDAG00000001493,ENSFDAG00000002748,ENSFDAG00000004129,ENSFDAG00000004696,ENSFDAG00000004944,ENSFDAG00000005250,ENSFDAG00000005504,ENSFDAG00000005537,ENSFDAG00000005565,ENSFDAG00000005711,ENSFDAG00000005862,ENSFDAG00000005890,ENSFDAG00000006063,ENSFDAG00000006162,ENSFDAG00000006438,ENSFDAG00000006457,ENSFDAG00000006541,ENSFDAG00000006826,…	Primed-enhancers_Liver_12421,Primed-enhancers_Liver_12439,Primed-enhancers_Liver_12443,Primed-enhancers_Liver_12562,Primed-enhancers_Liver_1258,Primed-enhancers_Liver_1261,Primed-enhancers_Liver_12644,Primed-enhancers_Liver_12754,Primed-enhancers_Liver_13448,Primed-enhancers_Liver_13470,Primed-enhancers_Liver_14573,Primed-enhancers_Liver_14580,Primed-enhancers_Liver_14581,Primed-enhancers_Liver_1…
GO:0001775	cell activation	1.25331	212	169.153	0.0145	1.29088	138	106.904	0.0149	Abat,Abl2,Adamts18,Adora3,Ahr,Akirin2,Ap3b1,Aplf,App,Arid1a,Arid1b,Arid2,Atp11c,Bank1,Batf2,Bcl11a,Blk,Bmp4,Braf,Cblb,Ccl19,Ccr6,Ccr7,Cd180,Cd274,Cd44,Cd59b,Cd9,Cftr,Chd7,Chrnb2,Cplx2,Ctnnb1,Cxcl12,Cxcr2,Cyp26b1,Dicer1,Dlg1,Dlg5,Dll1,Dnajb9,Dock10,Dock11,Dock2,Drosha,Efnb1,Ephb1,Ercc1,Fgf10,Fgfr1,Foxp1,Fzd6,Fzd8,Fzd9,Gal,Gja6,Gli3,Gm20547,Hdac7,Hdac9,Hectd1,Hmgb1,Hprt,Hspd1,Icos,Ifng,Igf1,Il17ra,…	ENSFDAG00000000334,ENSFDAG00000000528,ENSFDAG00000001180,ENSFDAG00000001807,ENSFDAG00000002080,ENSFDAG00000003064,ENSFDAG00000003104,ENSFDAG00000003357,ENSFDAG00000003809,ENSFDAG00000004101,ENSFDAG00000004662,ENSFDAG00000004696,ENSFDAG00000004743,ENSFDAG00000004839,ENSFDAG00000004944,ENSFDAG00000005217,ENSFDAG00000005395,ENSFDAG00000005504,ENSFDAG00000005614,ENSFDAG00000005741,ENSFDAG00000005862,…	Primed-enhancers_Liver_10091,Primed-enhancers_Liver_10875,Primed-enhancers_Liver_1258,Primed-enhancers_Liver_1261,Primed-enhancers_Liver_12754,Primed-enhancers_Liver_14718,Primed-enhancers_Liver_14722,Primed-enhancers_Liver_14726,Primed-enhancers_Liver_14771,Primed-enhancers_Liver_15014,Primed-enhancers_Liver_15149,Primed-enhancers_Liver_16024,Primed-enhancers_Liver_16027,Primed-enhancers_Liver_1…
GO:0051647	nucleus localization	2.46362	17	6.90041	0.0158	2.47486	10	4.04063	0.0494	Bin1,Cdc42bpa,Clmn,Dock7,Dync1h1,Fbxw11,Ntn1,Ptk2,Syne2,Tacc2	ENSFDAG00000006517,ENSFDAG00000008196,ENSFDAG00000009167,ENSFDAG00000009473,ENSFDAG00000009932,ENSFDAG00000010167,ENSFDAG00000011130,ENSFDAG00000011716,ENSFDAG00000015365,ENSFDAG00000017101	Primed-enhancers_Liver_10023,Primed-enhancers_Liver_10025,Primed-enhancers_Liver_11051,Primed-enhancers_Liver_11069,Primed-enhancers_Liver_11083,Primed-enhancers_Liver_15857,Primed-enhancers_Liver_15858,Primed-enhancers_Liver_15865,Primed-enhancers_Liver_17050,Primed-enhancers_Liver_17207,Primed-enhancers_Liver_26335,Primed-enhancers_Liver_34488,Primed-enhancers_Liver_4868,Primed-enhancers_Liver_…
GO:0035306	positive regulation of dephosphorylation	1.93173	30	15.5301	0.0159	2.73537	18	6.58046	0.0018	Bmp2,Dlc1,Gna12,Ifng,Itga2,Jak2,Magi2,Mtmr9,Npnt,Pawr,Plek,Ppargc1b,Ppp2ca,Ppp2ca,Rock1,Smad3,Sppl3,Tgfb1	ENSFDAG00000005951,ENSFDAG00000007035,ENSFDAG00000007271,ENSFDAG00000008083,ENSFDAG00000008680,ENSFDAG00000008719,ENSFDAG00000010085,ENSFDAG00000010481,ENSFDAG00000010878,ENSFDAG00000011655,ENSFDAG00000011692,ENSFDAG00000012484,ENSFDAG00000013386,ENSFDAG00000014285,ENSFDAG00000014357,ENSFDAG00000017588,ENSFDAG00000018047,ENSFDAG00000021126	Primed-enhancers_Liver_10472,Primed-enhancers_Liver_20904,Primed-enhancers_Liver_22993,Primed-enhancers_Liver_33969,Primed-enhancers_Liver_33980,Primed-enhancers_Liver_33981,Primed-enhancers_Liver_33986,Primed-enhancers_Liver_35618,Primed-enhancers_Liver_35619,Primed-enhancers_Liver_37616,Primed-enhancers_Liver_43490,Primed-enhancers_Liver_43508,Primed-enhancers_Liver_43510,Primed-enhancers_Liver…
GO:0001704	formation of primary germ layer	1.93119	30	15.5344	0.0159	2.24018	15	6.6959	0.0272	Acvr1,Arid1a,Bmp4,Chrd,Crb2,Ctnnb1,Dusp4,Exoc4,Gata4,Hnf1a,Inhba,Smad2,Smad3,Tnrc6c,Wnt5a	ENSFDAG00000002894,ENSFDAG00000005671,ENSFDAG00000005890,ENSFDAG00000007068,ENSFDAG00000007195,ENSFDAG00000008341,ENSFDAG00000009044,ENSFDAG00000009384,ENSFDAG00000010368,ENSFDAG00000012174,ENSFDAG00000012199,ENSFDAG00000012332,ENSFDAG00000014357,ENSFDAG00000014885,ENSFDAG00000021196	Primed-enhancers_Liver_13710,Primed-enhancers_Liver_13720,Primed-enhancers_Liver_13721,Primed-enhancers_Liver_17763,Primed-enhancers_Liver_17781,Primed-enhancers_Liver_17791,Primed-enhancers_Liver_17804,Primed-enhancers_Liver_17806,Primed-enhancers_Liver_21917,Primed-enhancers_Liver_22351,Primed-enhancers_Liver_22352,Primed-enhancers_Liver_22974,Primed-enhancers_Liver_28400,Primed-enhancers_Liver…
GO:0060993	kidney morphogenesis	2.45242	17	6.93193	0.0163	3.84978	8	2.07804	0.0101	Ahr,Ctnnb1,Fgf10,Fras1,Nphp3,Tshz3,Wnt9b,Wwtr1	ENSFDAG00000005741,ENSFDAG00000006135,ENSFDAG00000009384,ENSFDAG00000014315,ENSFDAG00000015383,ENSFDAG00000015784,ENSFDAG00000016074,ENSFDAG00000017616	Primed-enhancers_Liver_12958,Primed-enhancers_Liver_14771,Primed-enhancers_Liver_20961,Primed-enhancers_Liver_20962,Primed-enhancers_Liver_20965,Primed-enhancers_Liver_20966,Primed-enhancers_Liver_20967,Primed-enhancers_Liver_46484,Primed-enhancers_Liver_46493,Primed-enhancers_Liver_56615,Primed-enhancers_Liver_56616,Primed-enhancers_Liver_64182,Primed-enhancers_Liver_64183,Primed-enhancers_Liver…
GO:0032870	cellular response to hormone stimulus	1.39938	101	72.1751	0.017	1.48742	51	34.2876	0.0307	Acaca,Adcy8,Aqp1,Ar,Bcar1,Bmp4,Ctnnb1,Cyp11a1,Efna5,Eprs,Esr1,Fshr,Gata4,Ghsr,Grb14,Hdac9,Igf1,Igf1r,Inhba,Irs1,Jak2,Lep,Lhcgr,Lmbrd1,Nck1,Ncoa1,Ncoa2,Pax8,Pik3r1,Pklr,Plcb1,Pparg,Ppargc1a,Prkce,Prkcq,Pten,Rab10,Rab31,Rdx,Sorbs1,Sorl1,Sstr2,Tbc1d4,Tgfb1,Thrb,Tns2,Ube2l3,Uri1,Usf1,Wnt10b,Zfp36l1	ENSFDAG00000004696,ENSFDAG00000004743,ENSFDAG00000005659,ENSFDAG00000005671,ENSFDAG00000006381,ENSFDAG00000006600,ENSFDAG00000006801,ENSFDAG00000007925,ENSFDAG00000008083,ENSFDAG00000008095,ENSFDAG00000008423,ENSFDAG00000009044,ENSFDAG00000009384,ENSFDAG00000009792,ENSFDAG00000010085,ENSFDAG00000010323,ENSFDAG00000010527,ENSFDAG00000010961,ENSFDAG00000011238,ENSFDAG00000011525,ENSFDAG00000011788,…	Primed-enhancers_Liver_11968,Primed-enhancers_Liver_11969,Primed-enhancers_Liver_13470,Primed-enhancers_Liver_14098,Primed-enhancers_Liver_14102,Primed-enhancers_Liver_14718,Primed-enhancers_Liver_14722,Primed-enhancers_Liver_14726,Primed-enhancers_Liver_16024,Primed-enhancers_Liver_16027,Primed-enhancers_Liver_16028,Primed-enhancers_Liver_16029,Primed-enhancers_Liver_16036,Primed-enhancers_Liver…
GO:0044060	regulation of endocrine process	1.99325	27	13.5457	0.0172	2.34596	13	5.54144	0.0314	Acvr2a,Cry1,Dab2,Fgfr1,Gal,Inhba,Inhbb,Npvf,Nrg1,Oprk1,Pex5l,Runx1,Vdr	ENSFDAG00000001117,ENSFDAG00000002080,ENSFDAG00000002995,ENSFDAG00000005202,ENSFDAG00000006229,ENSFDAG00000008011,ENSFDAG00000009326,ENSFDAG00000010372,ENSFDAG00000012280,ENSFDAG00000017359,ENSFDAG00000017432,ENSFDAG00000019969,ENSFDAG00000021196	Primed-enhancers_Liver_17763,Primed-enhancers_Liver_17781,Primed-enhancers_Liver_17791,Primed-enhancers_Liver_17804,Primed-enhancers_Liver_17806,Primed-enhancers_Liver_24601,Primed-enhancers_Liver_27401,Primed-enhancers_Liver_27407,Primed-enhancers_Liver_27408,Primed-enhancers_Liver_2852,Primed-enhancers_Liver_30407,Primed-enhancers_Liver_35401,Primed-enhancers_Liver_36600,Primed-enhancers_Liver_…
GO:0001702	gastrulation with mouth forming second	2.4946	16	6.41384	0.0183	3.33154	10	3.00161	0.00854	Acvr1,Acvr2a,Chrd,Ctnnb1,Dact1,Gata4,Lrp5,Plpp3,Rnf2,Tenm4	ENSFDAG00000001117,ENSFDAG00000005671,ENSFDAG00000006183,ENSFDAG00000007195,ENSFDAG00000009384,ENSFDAG00000009506,ENSFDAG00000011119,ENSFDAG00000012332,ENSFDAG00000014923,ENSFDAG00000017218	Primed-enhancers_Liver_15615,Primed-enhancers_Liver_22974,Primed-enhancers_Liver_28400,Primed-enhancers_Liver_36630,Primed-enhancers_Liver_40677,Primed-enhancers_Liver_40694,Primed-enhancers_Liver_40698,Primed-enhancers_Liver_40701,Primed-enhancers_Liver_40711,Primed-enhancers_Liver_40999,Primed-enhancers_Liver_41000,Primed-enhancers_Liver_51310,Primed-enhancers_Liver_52150,Primed-enhancers_Liver…
GO:0048762	mesenchymal cell differentiation	1.47483	76	51.5314	0.0196	2.19224	41	18.7023	9.51e-05	Acvr1,Bmp2,Bmp4,Chrd,Clasp1,Col1a1,Crb2,Ctnnb1,Dab2,Dab2ip,Ddx17,Dlg5,Epha4,Fgf10,Fgfr1,Fgfr2,Gja6,Isl1,Kbtbd8,Pawr,Ppp2ca,Ppp2ca,Pten,Rock1,Rock2,Six2,Smad2,Smad3,Smad7,Sox9,Spry2,Tgfb1,Tgfb2,Tgfb3,Vegfa,Wnt10a,Wnt16,Wnt2,Wnt5a,Wwtr1,Zfp64	ENSFDAG00000000042,ENSFDAG00000000810,ENSFDAG00000002080,ENSFDAG00000002748,ENSFDAG00000002894,ENSFDAG00000003999,ENSFDAG00000004129,ENSFDAG00000004569,ENSFDAG00000004696,ENSFDAG00000005890,ENSFDAG00000005951,ENSFDAG00000006049,ENSFDAG00000007195,ENSFDAG00000007215,ENSFDAG00000007271,ENSFDAG00000007737,ENSFDAG00000008083,ENSFDAG00000009044,ENSFDAG00000009384,ENSFDAG00000009967,ENSFDAG00000010005,…	Primed-enhancers_Liver_10472,Primed-enhancers_Liver_12421,Primed-enhancers_Liver_13448,Primed-enhancers_Liver_13470,Primed-enhancers_Liver_14369,Primed-enhancers_Liver_16500,Primed-enhancers_Liver_1756,Primed-enhancers_Liver_1864,Primed-enhancers_Liver_1865,Primed-enhancers_Liver_1873,Primed-enhancers_Liver_20931,Primed-enhancers_Liver_20961,Primed-enhancers_Liver_20962,Primed-enhancers_Liver_209…
GO:0048732	gland development	1.452	82	56.4739	0.0198	1.69391	44	25.9755	0.00736	Ahr,Arhgap35,Asxl1,Bcl2l11,Bmp4,Braf,Cadm1,Ccnd1,Ctnnb1,Ephb3,Fgf10,Fgf3,Fgfr2,Gli2,Gli3,Gm28047,Hand2,Hnf1a,Hoxd3,Hrh2,Igf1,Igf1r,Irs1,Isl1,Jarid2,Lmo4,Man2a1,Nr5a1,Ntn1,Onecut1,Onecut2,Pax8,Pdx1,Pou1f1,Psen1,Runx1,Smad2,Smad3,Sox9,Sp3,Tfcp2l1,Tgfb1,Tgfb3,Wnt10a	ENSFDAG00000000295,ENSFDAG00000000362,ENSFDAG00000000810,ENSFDAG00000001188,ENSFDAG00000002894,ENSFDAG00000002987,ENSFDAG00000005217,ENSFDAG00000005632,ENSFDAG00000005741,ENSFDAG00000005748,ENSFDAG00000006049,ENSFDAG00000006381,ENSFDAG00000007068,ENSFDAG00000008083,ENSFDAG00000009044,ENSFDAG00000009167,ENSFDAG00000009384,ENSFDAG00000009453,ENSFDAG00000010097,ENSFDAG00000010248,ENSFDAG00000010263,…	Primed-enhancers_Liver_11051,Primed-enhancers_Liver_11069,Primed-enhancers_Liver_11083,Primed-enhancers_Liver_13448,Primed-enhancers_Liver_13470,Primed-enhancers_Liver_14771,Primed-enhancers_Liver_16311,Primed-enhancers_Liver_16500,Primed-enhancers_Liver_1756,Primed-enhancers_Liver_17758,Primed-enhancers_Liver_17763,Primed-enhancers_Liver_18600,Primed-enhancers_Liver_18612,Primed-enhancers_Liver_…
GO:1901701	cellular response to oxygen-containing compound	1.25035	205	163.955	0.0198	1.265	118	93.2808	0.0422	Aanat,Abca1,Abl2,Acaca,Adcy8,Add1,Ahr,Ano1,App,Aqp1,Aqp2,Ar,Arhgef2,Bcar1,Bmp4,Brinp2,Calcrl,Capn1,Cd180,Cd274,Cftr,Col1a1,Cpeb3,Cpeb4,Ctnna1,Ctnnb1,Cyp11a1,Dab2ip,Dnmt3a,Efna5,Epha4,Eprs,Esr1,Foxp1,Gabpa,Ghsr,Gja6,Gm45837,Gnai1,Grb14,Grin2a,Hdac8,Hdac9,Hmgb1,Hnf1a,Ifng,Igf1,Igf1r,Inhba,Inhbb,Irs1,Itpr2,Jak2,Kcnc2,Lep,Lhcgr,Lmbrd1,Map3k5,Mlxipl,Mpv17,Nck1,Ncoa1,Ncoa2,Net1,Neurl1a,Neurod1,Nod1,Nri…	ENSFDAG00000000054,ENSFDAG00000001807,ENSFDAG00000002280,ENSFDAG00000003064,ENSFDAG00000003960,ENSFDAG00000004027,ENSFDAG00000004129,ENSFDAG00000004696,ENSFDAG00000004743,ENSFDAG00000005130,ENSFDAG00000005217,ENSFDAG00000005223,ENSFDAG00000005395,ENSFDAG00000005504,ENSFDAG00000005723,ENSFDAG00000005741,ENSFDAG00000005761,ENSFDAG00000005951,ENSFDAG00000006042,ENSFDAG00000006071,ENSFDAG00000006229,…	Primed-enhancers_Liver_10472,Primed-enhancers_Liver_11968,Primed-enhancers_Liver_11969,Primed-enhancers_Liver_12421,Primed-enhancers_Liver_13448,Primed-enhancers_Liver_13470,Primed-enhancers_Liver_13667,Primed-enhancers_Liver_14072,Primed-enhancers_Liver_14098,Primed-enhancers_Liver_14102,Primed-enhancers_Liver_14369,Primed-enhancers_Liver_14627,Primed-enhancers_Liver_14718,Primed-enhancers_Liver…
GO:0050796	regulation of insulin secretion	1.5354	63	41.0318	0.0201	1.77069	37	20.8958	0.00839	Abat,Acvr1c,Adcy8,Ano1,Arntl,BC048507,Blk,Cask,Cftr,Efna5,Ghsr,Gipr,Gja6,Glul,Gpr68,Hmgcr,Ifng,Inhbb,Irs1,Isl1,Jak2,Klf7,Lep,Lrp5,Mtnr1a,Mtnr1b,Pde3b,Pde8b,Pdx1,Ppard,Ppp3ca,Prkce,Rfx3,Serp1,Sybu,Tbc1d1,Tcirg1	ENSFDAG00000002233,ENSFDAG00000003167,ENSFDAG00000004453,ENSFDAG00000005695,ENSFDAG00000005761,ENSFDAG00000006049,ENSFDAG00000007389,ENSFDAG00000007436,ENSFDAG00000007616,ENSFDAG00000008823,ENSFDAG00000009191,ENSFDAG00000010085,ENSFDAG00000010357,ENSFDAG00000010878,ENSFDAG00000011119,ENSFDAG00000012391,ENSFDAG00000012941,ENSFDAG00000012942,ENSFDAG00000012995,ENSFDAG00000013126,ENSFDAG00000013524,…	Primed-enhancers_Liver_1400,Primed-enhancers_Liver_1404,Primed-enhancers_Liver_1407,Primed-enhancers_Liver_16881,Primed-enhancers_Liver_16886,Primed-enhancers_Liver_17039,Primed-enhancers_Liver_2001,Primed-enhancers_Liver_20019,Primed-enhancers_Liver_20094,Primed-enhancers_Liver_2013,Primed-enhancers_Liver_20931,Primed-enhancers_Liver_22974,Primed-enhancers_Liver_24109,Primed-enhancers_Liver_2411…
GO:0010632	regulation of epithelial cell migration	1.40027	98	69.9865	0.0205	1.90142	54	28.3999	0.000157	Adamts9,Adgrb1,Angpt1,Aqp1,Arsb,Bcar1,Bmp4,Ccr6,Clasp1,Dab2ip,Dicer1,Ets1,Fgf10,Fgfr1,Foxp1,Glul,Hdac7,Hdac9,Hmgb1,Ifng,Igf1,Irs1,Itga2,Itga3,Klf4,Macir,Map2k5,Mapre2,Mcc,Meox2,Nrp1,Patz1,Pdpk1,Pfn2,Pik3cg,Plpp3,Pparg,Prkce,Prkd2,Pten,Ptk2,Ptprr,Rin2,Rock2,Sash1,Sema5a,Slit2,Sox9,Sparc,Tgfb1,Tgfb2,Vegfa,Vil1,Wnt5a	ENSFDAG00000000042,ENSFDAG00000001200,ENSFDAG00000001493,ENSFDAG00000002080,ENSFDAG00000002280,ENSFDAG00000002748,ENSFDAG00000004696,ENSFDAG00000004743,ENSFDAG00000004907,ENSFDAG00000005242,ENSFDAG00000005614,ENSFDAG00000005890,ENSFDAG00000006826,ENSFDAG00000007035,ENSFDAG00000008083,ENSFDAG00000009044,ENSFDAG00000009107,ENSFDAG00000009317,ENSFDAG00000009788,ENSFDAG00000010167,ENSFDAG00000010318,…	Primed-enhancers_Liver_10617,Primed-enhancers_Liver_12439,Primed-enhancers_Liver_12443,Primed-enhancers_Liver_13448,Primed-enhancers_Liver_13470,Primed-enhancers_Liver_14369,Primed-enhancers_Liver_14627,Primed-enhancers_Liver_14718,Primed-enhancers_Liver_14722,Primed-enhancers_Liver_14726,Primed-enhancers_Liver_14812,Primed-enhancers_Liver_14815,Primed-enhancers_Liver_17039,Primed-enhancers_Liver…
GO:0071335	hair follicle cell proliferation	3.96465	8	2.01783	0.0205	6.92961	4	0.577233	0.0149	Dicer1,Dlx3,Fgf10,Runx1	ENSFDAG00000012280,ENSFDAG00000017616,ENSFDAG00000020762,ENSFDAG00000021287	Primed-enhancers_Liver_12443,Primed-enhancers_Liver_17039,Primed-enhancers_Liver_20961,Primed-enhancers_Liver_20962,Primed-enhancers_Liver_20965,Primed-enhancers_Liver_20966,Primed-enhancers_Liver_20967,Primed-enhancers_Liver_30407
GO:0080135	regulation of cellular response to stress	1.25915	192	152.484	0.0205	1.30992	111	84.7378	0.0233	Abcd1,Ackr3,Adcy8,Amfr,App,Arid1a,Arid1b,Arid2,Atxn7,Baz1b,Bfar,Bmp2,Bmp4,Braf,Ccl19,Cd44,Chordc1,Cry1,Ctnnb1,Cxcl12,Dab2,Dab2ip,Dact1,Dlg1,Dmap1,Dpf3,Dyrk1a,Eif2ak3,Epc2,Epha4,Ephb1,Ercc1,Etaa1,Eya3,Eya4,Fech,Fgf10,Foxp1,Gata4,Grik2,Hand2,Helb,Hipk2,Hmgb1,Hmgcr,Igf1r,Ino80d,Klf4,Kremen1,Lep,Map3k1,Map3k5,Map3k7,Map4k2,Mapkap1,Mapt,Mfhas1,Mid1,Muc1,Myc,Nck1,Nek1,Nod1,Npm1,Nrg1,Nsmce4a,Oprk1,Pawr,…	ENSFDAG00000000334,ENSFDAG00000000501,ENSFDAG00000001733,ENSFDAG00000002571,ENSFDAG00000002748,ENSFDAG00000003318,ENSFDAG00000003960,ENSFDAG00000004696,ENSFDAG00000004839,ENSFDAG00000005242,ENSFDAG00000005504,ENSFDAG00000005565,ENSFDAG00000005671,ENSFDAG00000005706,ENSFDAG00000005890,ENSFDAG00000006162,ENSFDAG00000006183,ENSFDAG00000006229,ENSFDAG00000006381,ENSFDAG00000006438,ENSFDAG00000006506,…	Primed-enhancers_Liver_11446,Primed-enhancers_Liver_12471,Primed-enhancers_Liver_12472,Primed-enhancers_Liver_12754,Primed-enhancers_Liver_13020,Primed-enhancers_Liver_1354,Primed-enhancers_Liver_14369,Primed-enhancers_Liver_15036,Primed-enhancers_Liver_15615,Primed-enhancers_Liver_16253,Primed-enhancers_Liver_16255,Primed-enhancers_Liver_16256,Primed-enhancers_Liver_16290,Primed-enhancers_Liver_…
GO:0017015	regulation of transforming growth factor beta receptor signaling pathway	1.677	45	26.8337	0.0205	1.81298	27	14.8926	0.0229	Bmp2,Cdkn2b,Crebbp,Dab2,Fermt1,Got1,Hipk2,Itga3,Lats1,Npnt,Nrep,Onecut1,Onecut2,Pparg,Ppm1a,Rasl11b,Sap30,Sin3a,Smad2,Smad3,Smad7,Spry2,Strap,Suds3,Tgfb1,Tgfb3,Wfikkn2	ENSFDAG00000000501,ENSFDAG00000000810,ENSFDAG00000002894,ENSFDAG00000003278,ENSFDAG00000004743,ENSFDAG00000007952,ENSFDAG00000008083,ENSFDAG00000008711,ENSFDAG00000010372,ENSFDAG00000010997,ENSFDAG00000011655,ENSFDAG00000011692,ENSFDAG00000012059,ENSFDAG00000012253,ENSFDAG00000013373,ENSFDAG00000014357,ENSFDAG00000014464,ENSFDAG00000014534,ENSFDAG00000014957,ENSFDAG00000015852,ENSFDAG00000016915,…	Primed-enhancers_Liver_12365,Primed-enhancers_Liver_12381,Primed-enhancers_Liver_12439,Primed-enhancers_Liver_12443,Primed-enhancers_Liver_15680,Primed-enhancers_Liver_16500,Primed-enhancers_Liver_24109,Primed-enhancers_Liver_24110,Primed-enhancers_Liver_24601,Primed-enhancers_Liver_27775,Primed-enhancers_Liver_34523,Primed-enhancers_Liver_34524,Primed-enhancers_Liver_35766,Primed-enhancers_Liver…
GO:0010718	positive regulation of epithelial to mesenchymal transition	1.96286	28	14.2649	0.0205	2.82019	14	4.9642	0.00582	Acvr1,Bmp2,Bmp4,Col1a1,Crb2,Ctnnb1,Dab2,Isl1,Smad2,Smad3,Tgfb1,Tgfb2,Tgfb3,Wwtr1	ENSFDAG00000000810,ENSFDAG00000002894,ENSFDAG00000004129,ENSFDAG00000006049,ENSFDAG00000007195,ENSFDAG00000008083,ENSFDAG00000009044,ENSFDAG00000009384,ENSFDAG00000010372,ENSFDAG00000011655,ENSFDAG00000012174,ENSFDAG00000012435,ENSFDAG00000014357,ENSFDAG00000016074	Primed-enhancers_Liver_12421,Primed-enhancers_Liver_16500,Primed-enhancers_Liver_20931,Primed-enhancers_Liver_22351,Primed-enhancers_Liver_22352,Primed-enhancers_Liver_24601,Primed-enhancers_Liver_36243,Primed-enhancers_Liver_36258,Primed-enhancers_Liver_36263,Primed-enhancers_Liver_40408,Primed-enhancers_Liver_40445,Primed-enhancers_Liver_40446,Primed-enhancers_Liver_40999,Primed-enhancers_Liver…
GO:0003148	outflow tract septum morphogenesis	1.9548	28	14.3238	0.0205	3.33154	10	3.00161	0.00854	Bmp4,Fgfr2,Isl1,Nrp1,Nrp2,Parva,Rarb,Robo1,Robo2,Tgfb2	ENSFDAG00000006049,ENSFDAG00000006096,ENSFDAG00000007633,ENSFDAG00000007990,ENSFDAG00000009044,ENSFDAG00000012435,ENSFDAG00000015301,ENSFDAG00000016861,ENSFDAG00000016928,ENSFDAG00000018458	Primed-enhancers_Liver_1304,Primed-enhancers_Liver_1305,Primed-enhancers_Liver_1307,Primed-enhancers_Liver_1354,Primed-enhancers_Liver_20931,Primed-enhancers_Liver_21294,Primed-enhancers_Liver_21297,Primed-enhancers_Liver_21300,Primed-enhancers_Liver_21304,Primed-enhancers_Liver_21312,Primed-enhancers_Liver_21317,Primed-enhancers_Liver_21346,Primed-enhancers_Liver_21350,Primed-enhancers_Liver_223…
GO:0070169	positive regulation of biomineral tissue development	1.85801	31	16.6845	0.0213	2.77184	16	5.77233	0.00334	Acvr1,Acvr2a,Ano6,Asxl2,Bmp2,Bmp4,Cftr,Enam,Fam20c,Fzd9,Ptn,Smad3,Tent5a,Vdr,Wnt10b,Wnt6	ENSFDAG00000001117,ENSFDAG00000005565,ENSFDAG00000006573,ENSFDAG00000007195,ENSFDAG00000007477,ENSFDAG00000007616,ENSFDAG00000008670,ENSFDAG00000009044,ENSFDAG00000009326,ENSFDAG00000010907,ENSFDAG00000011655,ENSFDAG00000013027,ENSFDAG00000014357,ENSFDAG00000015976,ENSFDAG00000019148,ENSFDAG00000021455	Primed-enhancers_Liver_14034,Primed-enhancers_Liver_1756,Primed-enhancers_Liver_22351,Primed-enhancers_Liver_22352,Primed-enhancers_Liver_27294,Primed-enhancers_Liver_27295,Primed-enhancers_Liver_27401,Primed-enhancers_Liver_27407,Primed-enhancers_Liver_27408,Primed-enhancers_Liver_27436,Primed-enhancers_Liver_40677,Primed-enhancers_Liver_40694,Primed-enhancers_Liver_40698,Primed-enhancers_Liver_…
GO:0030916	otic vesicle formation	3.2692	10	3.05885	0.0213	5.77468	4	0.69268	0.0295	Fgf10,Fgf3,Fgfr2,Sox9	ENSFDAG00000001188,ENSFDAG00000012886,ENSFDAG00000017616,ENSFDAG00000018458	Primed-enhancers_Liver_13448,Primed-enhancers_Liver_13470,Primed-enhancers_Liver_20961,Primed-enhancers_Liver_20962,Primed-enhancers_Liver_20965,Primed-enhancers_Liver_20966,Primed-enhancers_Liver_20967,Primed-enhancers_Liver_66834,Primed-enhancers_Liver_66850,Primed-enhancers_Liver_67499
GO:0030073	insulin secretion	1.47797	72	48.7154	0.0222	1.62166	41	25.2828	0.0196	Abat,Acvr1c,Adcy8,Ano1,Arntl,BC048507,Blk,Cacna1c,Cask,Cftr,Efna5,Ghsr,Gipr,Gja6,Glul,Gpr68,Hmgcr,Hnf1a,Ifng,Inhbb,Irs1,Isl1,Jak2,Klf7,Lep,Lrp5,Mtnr1a,Mtnr1b,Neurod1,Pde3b,Pde8b,Pdx1,Ppard,Ppp3ca,Prkce,Rfx3,Serp1,Smad2,Sybu,Tbc1d1,Tcirg1	ENSFDAG00000002233,ENSFDAG00000002894,ENSFDAG00000003167,ENSFDAG00000004453,ENSFDAG00000005695,ENSFDAG00000005761,ENSFDAG00000006049,ENSFDAG00000007068,ENSFDAG00000007389,ENSFDAG00000007436,ENSFDAG00000007616,ENSFDAG00000008823,ENSFDAG00000009139,ENSFDAG00000009191,ENSFDAG00000010085,ENSFDAG00000010357,ENSFDAG00000010878,ENSFDAG00000011119,ENSFDAG00000012194,ENSFDAG00000012391,ENSFDAG00000012941,…	Primed-enhancers_Liver_1400,Primed-enhancers_Liver_1404,Primed-enhancers_Liver_1407,Primed-enhancers_Liver_16881,Primed-enhancers_Liver_16886,Primed-enhancers_Liver_17039,Primed-enhancers_Liver_2001,Primed-enhancers_Liver_20019,Primed-enhancers_Liver_20094,Primed-enhancers_Liver_2013,Primed-enhancers_Liver_20931,Primed-enhancers_Liver_22974,Primed-enhancers_Liver_24109,Primed-enhancers_Liver_2411…
GO:0050886	endocrine process	1.81303	33	18.2016	0.0224	2.13584	18	8.4276	0.0209	Ace,Ace2,Acvr2a,Corin,Cry1,Dab2,Fgfr1,Gal,Inhba,Inhbb,Npvf,Nr3c2,Nrg1,Oprk1,Pex5l,Runx1,Serpinf2,Vdr	ENSFDAG00000001117,ENSFDAG00000002080,ENSFDAG00000002995,ENSFDAG00000005202,ENSFDAG00000006229,ENSFDAG00000007922,ENSFDAG00000008011,ENSFDAG00000009326,ENSFDAG00000009629,ENSFDAG00000010372,ENSFDAG00000011675,ENSFDAG00000012280,ENSFDAG00000012779,ENSFDAG00000016406,ENSFDAG00000017359,ENSFDAG00000017432,ENSFDAG00000019969,ENSFDAG00000021196	Primed-enhancers_Liver_11446,Primed-enhancers_Liver_13060,Primed-enhancers_Liver_17763,Primed-enhancers_Liver_17781,Primed-enhancers_Liver_17791,Primed-enhancers_Liver_17804,Primed-enhancers_Liver_17806,Primed-enhancers_Liver_24601,Primed-enhancers_Liver_27401,Primed-enhancers_Liver_27407,Primed-enhancers_Liver_27408,Primed-enhancers_Liver_2852,Primed-enhancers_Liver_30407,Primed-enhancers_Liver_…
GO:0010464	regulation of mesenchymal cell proliferation	1.78127	35	19.6489	0.0224	3.80284	18	4.73331	3.09e-05	Bmp4,Chrd,Ctnnb1,Fgfr1,Fgfr2,Foxp1,Hmgb1,Irs1,Lrp5,Myc,Nfib,Pdgfa,Ptn,Sox9,Tbx18,Vegfa,Wnt2,Wnt5a	ENSFDAG00000002080,ENSFDAG00000002748,ENSFDAG00000004839,ENSFDAG00000005565,ENSFDAG00000005890,ENSFDAG00000007215,ENSFDAG00000008466,ENSFDAG00000009044,ENSFDAG00000009317,ENSFDAG00000009384,ENSFDAG00000011119,ENSFDAG00000012167,ENSFDAG00000012332,ENSFDAG00000012354,ENSFDAG00000012886,ENSFDAG00000014474,ENSFDAG00000018458,ENSFDAG00000018637	Primed-enhancers_Liver_13448,Primed-enhancers_Liver_13470,Primed-enhancers_Liver_190,Primed-enhancers_Liver_199,Primed-enhancers_Liver_2001,Primed-enhancers_Liver_2013,Primed-enhancers_Liver_218,Primed-enhancers_Liver_21917,Primed-enhancers_Liver_22351,Primed-enhancers_Liver_22352,Primed-enhancers_Liver_26005,Primed-enhancers_Liver_28400,Primed-enhancers_Liver_32246,Primed-enhancers_Liver_36630,P…
GO:0048819	regulation of hair follicle maturation	3.23562	10	3.09059	0.0225	5.77468	6	1.03902	0.00434	Ctnnb1,Fermt1,Gal,Tgfb2,Wnt10b,Wnt5a	ENSFDAG00000005890,ENSFDAG00000008711,ENSFDAG00000009384,ENSFDAG00000012435,ENSFDAG00000017359,ENSFDAG00000019148	Primed-enhancers_Liver_21917,Primed-enhancers_Liver_27436,Primed-enhancers_Liver_36600,Primed-enhancers_Liver_36601,Primed-enhancers_Liver_36603,Primed-enhancers_Liver_43479,Primed-enhancers_Liver_5068,Primed-enhancers_Liver_5069,Primed-enhancers_Liver_5090,Primed-enhancers_Liver_75574
GO:0022612	gland morphogenesis	2.33254	18	7.7169	0.0241	2.99839	9	3.00161	0.0254	Bmp4,Cul3,Fgf10,Fgfr1,Fgfr2,Hoxd13,Nkx2-3,Sox9,Wnt5a	ENSFDAG00000002080,ENSFDAG00000005890,ENSFDAG00000008239,ENSFDAG00000009044,ENSFDAG00000010192,ENSFDAG00000012886,ENSFDAG00000017546,ENSFDAG00000017616,ENSFDAG00000018458	Primed-enhancers_Liver_13448,Primed-enhancers_Liver_13470,Primed-enhancers_Liver_1959,Primed-enhancers_Liver_1973,Primed-enhancers_Liver_20961,Primed-enhancers_Liver_20962,Primed-enhancers_Liver_20965,Primed-enhancers_Liver_20966,Primed-enhancers_Liver_20967,Primed-enhancers_Liver_21917,Primed-enhancers_Liver_22351,Primed-enhancers_Liver_22352,Primed-enhancers_Liver_38331,Primed-enhancers_Liver_3…
GO:0007176	regulation of epidermal growth factor-activated receptor activity	2.57447	14	5.43801	0.0241	2.9869	10	3.34795	0.018	Aplp2,App,Cbl,Cblb,Epgn,Ereg,Gprc5a,Neurl1a,Psen1,Tgfa	ENSFDAG00000005217,ENSFDAG00000005581,ENSFDAG00000005827,ENSFDAG00000008182,ENSFDAG00000008491,ENSFDAG00000012799,ENSFDAG00000013585,ENSFDAG00000013994,ENSFDAG00000018450,ENSFDAG00000020433	Primed-enhancers_Liver_16311,Primed-enhancers_Liver_29467,Primed-enhancers_Liver_29470,Primed-enhancers_Liver_30110,Primed-enhancers_Liver_30127,Primed-enhancers_Liver_30128,Primed-enhancers_Liver_38595,Primed-enhancers_Liver_56509,Primed-enhancers_Liver_56510,Primed-enhancers_Liver_61172,Primed-enhancers_Liver_62937,Primed-enhancers_Liver_62938,Primed-enhancers_Liver_71905,Primed-enhancers_Liver…
GO:1900369	negative regulation of post-transcriptional gene silencing by RNA	3.45375	9	2.60587	0.0241	3.46481	6	1.7317	0.047	Adar,Esr1,Hnf1a,Pparg,Ppp3ca,Tgfb1	ENSFDAG00000004743,ENSFDAG00000007068,ENSFDAG00000008083,ENSFDAG00000016081,ENSFDAG00000019132,ENSFDAG00000019290	Primed-enhancers_Liver_47447,Primed-enhancers_Liver_47448,Primed-enhancers_Liver_48967,Primed-enhancers_Liver_49002,Primed-enhancers_Liver_5441,Primed-enhancers_Liver_57307,Primed-enhancers_Liver_57308,Primed-enhancers_Liver_62303,Primed-enhancers_Liver_63848
GO:1901990	regulation of mitotic cell cycle phase transition	1.40327	92	65.5612	0.0247	1.42173	54	37.9819	0.0475	Acvr1,Anapc7,App,Arid1a,Arid1b,Arid2,Bub3,Ccnd1,Ccnh,Cdkn2b,Cpsf3,Crebbp,Ctdspl,Cul3,Dact1,Dcun1d3,Ddx3x,Dlg1,Donson,Dpf3,Ercc3,Fgf10,Fhl1,Foxn3,Hecw2,Inhba,Jade1,Klf4,Mad2l1,Mnat1,Muc1,Nek6,Nuf2,Plcb1,Pml,Ppp2ca,Ppp2ca,Ppp2r5c,Prkcq,Pten,Rad51b,Rbbp8,Rdx,Rrm1,Sin3a,Smarca2,Smarce1,Taok3,Tgfb1,Tpr,Ube2e2,Wnt10b,Zfp36l1,Zwint	ENSFDAG00000000334,ENSFDAG00000000548,ENSFDAG00000003338,ENSFDAG00000003637,ENSFDAG00000004040,ENSFDAG00000004395,ENSFDAG00000004696,ENSFDAG00000005436,ENSFDAG00000005951,ENSFDAG00000006183,ENSFDAG00000006317,ENSFDAG00000006438,ENSFDAG00000007182,ENSFDAG00000007195,ENSFDAG00000007707,ENSFDAG00000007850,ENSFDAG00000008083,ENSFDAG00000008341,ENSFDAG00000008346,ENSFDAG00000008423,ENSFDAG00000010071,…	Primed-enhancers_Liver_1018,Primed-enhancers_Liver_10472,Primed-enhancers_Liver_12754,Primed-enhancers_Liver_14426,Primed-enhancers_Liver_15615,Primed-enhancers_Liver_15721,Primed-enhancers_Liver_16024,Primed-enhancers_Liver_16027,Primed-enhancers_Liver_16028,Primed-enhancers_Liver_16029,Primed-enhancers_Liver_16036,Primed-enhancers_Liver_16253,Primed-enhancers_Liver_16255,Primed-enhancers_Liver_…
GO:0007507	heart development	1.38859	96	69.135	0.0259	1.5167	45	29.6698	0.0344	Acvr1,Asxl2,Bcor,Bmp2,Bmp4,Cacna1c,Calcrl,Chd7,Ctnnb1,Dnah5,Foxp1,Gab1,Gata4,Gja6,Gli2,Gli3,Gm28047,Gm45837,Gm572,Hand2,Hdac9,Isl1,Map2k5,Mef2a,Mnat1,Nrg1,Nrp1,Nrp2,Pax3,Pcsk5,Pkp2,Psen1,Pten,Robo1,Sall4,Sh3pxd2b,Smad2,Sox9,Tab2,Tead1,Tgfb1,Tgfb2,Vcan,Wdr11,Zfp36l1	ENSFDAG00000000528,ENSFDAG00000002894,ENSFDAG00000004141,ENSFDAG00000004696,ENSFDAG00000005217,ENSFDAG00000005671,ENSFDAG00000006049,ENSFDAG00000006541,ENSFDAG00000006694,ENSFDAG00000007195,ENSFDAG00000007633,ENSFDAG00000007990,ENSFDAG00000008083,ENSFDAG00000008670,ENSFDAG00000009044,ENSFDAG00000009107,ENSFDAG00000009139,ENSFDAG00000009384,ENSFDAG00000009453,ENSFDAG00000010598,ENSFDAG00000011176,…	Primed-enhancers_Liver_1304,Primed-enhancers_Liver_1305,Primed-enhancers_Liver_1307,Primed-enhancers_Liver_13448,Primed-enhancers_Liver_13470,Primed-enhancers_Liver_1354,Primed-enhancers_Liver_14034,Primed-enhancers_Liver_14718,Primed-enhancers_Liver_14722,Primed-enhancers_Liver_14726,Primed-enhancers_Liver_15721,Primed-enhancers_Liver_16024,Primed-enhancers_Liver_16027,Primed-enhancers_Liver_160…
GO:0060986	endocrine hormone secretion	1.84625	30	16.2491	0.0259	2.272	16	7.04224	0.0196	Acvr2a,Aqp1,C1qtnf3,Cry1,Dab2,Fgfr1,Gal,Inhba,Inhbb,Npvf,Nrg1,Oprk1,Pex5l,Pparg,Runx1,Vdr	ENSFDAG00000000130,ENSFDAG00000001117,ENSFDAG00000002080,ENSFDAG00000002995,ENSFDAG00000004743,ENSFDAG00000005202,ENSFDAG00000006229,ENSFDAG00000008011,ENSFDAG00000009326,ENSFDAG00000010372,ENSFDAG00000011525,ENSFDAG00000012280,ENSFDAG00000017359,ENSFDAG00000017432,ENSFDAG00000019969,ENSFDAG00000021196	Primed-enhancers_Liver_17763,Primed-enhancers_Liver_17781,Primed-enhancers_Liver_17791,Primed-enhancers_Liver_17804,Primed-enhancers_Liver_17806,Primed-enhancers_Liver_24601,Primed-enhancers_Liver_24794,Primed-enhancers_Liver_27401,Primed-enhancers_Liver_27407,Primed-enhancers_Liver_27408,Primed-enhancers_Liver_2852,Primed-enhancers_Liver_30407,Primed-enhancers_Liver_35401,Primed-enhancers_Liver_…
GO:1903131	mononuclear cell differentiation	1.34456	112	83.2983	0.0286	1.51743	72	47.4485	0.00514	Abl2,Ahr,Ap3b1,Arid1a,Arid1b,Arid2,Atp11c,Batf2,Bcl11a,Blk,Bmp4,Braf,Ccl19,Ccr6,Ccr7,Cd44,Chd7,Ctnnb1,Cyp26b1,Dicer1,Dll1,Dnajb9,Dock10,Dock11,Drosha,Foxp1,Fzd8,Fzd9,Gli3,Gpr68,Hdac7,Hdac9,Hectd1,Hmgb1,Ifng,Itgb6,Itgb8,Itpkb,Lep,Lyl1,Myc,Nkx2-3,Onecut1,Patz1,Pik3r1,Plcl2,Pou1f1,Pparg,Prex1,Psen1,Ripk2,Rora,Rorc,Runx1,Satb1,Sh3rf1,Smad7,Smarca2,Smarce1,Sp3,Tcirg1,Tgfb1,Tnfaip3,Tox,Txk,Vegfa,Wnt10b…	ENSFDAG00000000334,ENSFDAG00000000528,ENSFDAG00000001807,ENSFDAG00000002748,ENSFDAG00000003104,ENSFDAG00000004101,ENSFDAG00000004743,ENSFDAG00000004839,ENSFDAG00000005217,ENSFDAG00000005395,ENSFDAG00000005504,ENSFDAG00000005614,ENSFDAG00000005741,ENSFDAG00000006063,ENSFDAG00000006438,ENSFDAG00000006493,ENSFDAG00000006824,ENSFDAG00000007522,ENSFDAG00000007714,ENSFDAG00000008006,ENSFDAG00000008083,…	Primed-enhancers_Liver_12754,Primed-enhancers_Liver_14718,Primed-enhancers_Liver_14722,Primed-enhancers_Liver_14726,Primed-enhancers_Liver_14771,Primed-enhancers_Liver_15014,Primed-enhancers_Liver_15149,Primed-enhancers_Liver_16024,Primed-enhancers_Liver_16027,Primed-enhancers_Liver_16028,Primed-enhancers_Liver_16029,Primed-enhancers_Liver_16036,Primed-enhancers_Liver_16311,Primed-enhancers_Liver…
GO:0046879	hormone secretion	1.35417	109	80.4919	0.0289	1.53441	62	40.4063	0.00843	Abat,Acvr1c,Acvr2a,Adcy8,Adora3,Ano1,Aqp1,Arntl,BC048507,Blk,C1qtnf3,Cacna1c,Cask,Cftr,Chd7,Cry1,Dab2,Efna5,Fgfr1,Gal,Ghsr,Gipr,Gja6,Glul,Gpr68,Hmgcr,Hnf1a,Ifng,Inhba,Inhbb,Irs1,Isl1,Jak2,Klf7,Lep,Lrp5,Mtnr1a,Mtnr1b,Neurod1,Npvf,Nrg1,Oprk1,P2ry1,Pax8,Pde3b,Pde8b,Pdx1,Pex5l,Ppard,Pparg,Ppp3ca,Prkce,Rfx3,Runx1,Serp1,Slc16a2,Smad2,Sybu,Tbc1d1,Tcirg1,Tnfsf11,Vdr	ENSFDAG00000000130,ENSFDAG00000000528,ENSFDAG00000001117,ENSFDAG00000002080,ENSFDAG00000002233,ENSFDAG00000002894,ENSFDAG00000002995,ENSFDAG00000003167,ENSFDAG00000003809,ENSFDAG00000004453,ENSFDAG00000004743,ENSFDAG00000005202,ENSFDAG00000005695,ENSFDAG00000005761,ENSFDAG00000006049,ENSFDAG00000006229,ENSFDAG00000007068,ENSFDAG00000007389,ENSFDAG00000007436,ENSFDAG00000007616,ENSFDAG00000008011,…	Primed-enhancers_Liver_1400,Primed-enhancers_Liver_1404,Primed-enhancers_Liver_1407,Primed-enhancers_Liver_16881,Primed-enhancers_Liver_16886,Primed-enhancers_Liver_17039,Primed-enhancers_Liver_17763,Primed-enhancers_Liver_17781,Primed-enhancers_Liver_17791,Primed-enhancers_Liver_17804,Primed-enhancers_Liver_17806,Primed-enhancers_Liver_2001,Primed-enhancers_Liver_20019,Primed-enhancers_Liver_200…
GO:0061448	connective tissue development	1.72257	37	21.4796	0.0302	2.13738	19	8.88939	0.0171	Creb5,Fto,Klf7,Lep,Lrp5,Mkx,Ncoa1,Ncoa2,Pgrmc2,Ppard,Pparg,Ppargc1a,Rarb,Rorc,Sh3pxd2b,Sorl1,Tgfb1,Thbs3,Zfp516	ENSFDAG00000001331,ENSFDAG00000001467,ENSFDAG00000001807,ENSFDAG00000004743,ENSFDAG00000005659,ENSFDAG00000005761,ENSFDAG00000006096,ENSFDAG00000007436,ENSFDAG00000008083,ENSFDAG00000010014,ENSFDAG00000011119,ENSFDAG00000011476,ENSFDAG00000013790,ENSFDAG00000014292,ENSFDAG00000014648,ENSFDAG00000015052,ENSFDAG00000017412,ENSFDAG00000019085,ENSFDAG00000020796	Primed-enhancers_Liver_1400,Primed-enhancers_Liver_1404,Primed-enhancers_Liver_1407,Primed-enhancers_Liver_14098,Primed-enhancers_Liver_14102,Primed-enhancers_Liver_190,Primed-enhancers_Liver_21294,Primed-enhancers_Liver_21297,Primed-enhancers_Liver_21300,Primed-enhancers_Liver_21304,Primed-enhancers_Liver_21312,Primed-enhancers_Liver_21317,Primed-enhancers_Liver_21346,Primed-enhancers_Liver_2135…
GO:0044057	regulation of system process	1.24732	185	148.317	0.0309	1.55887	106	67.998	0.000139	Abat,Ace,Ace2,Acpp,Acvr2a,Afdn,Ahr,App,Aqp1,Atp2a2,Bin1,Cacna1c,Cacna1h,Calcrl,Celf4,Chrnb2,Cntnap2,Corin,Cry1,Cttn,Dab2,Dicer1,Dlg1,Dock4,Drd4,Eif2ak3,Epas1,Epb41,Fgf10,Fgfr1,Foxp1,Fto,Gal,Gata4,Ghsr,Gja6,Gls,Gnao1,Grin2a,Gtf2ird1,Hand2,Hmgcr,Hrh2,Ifng,Igf1,Inhba,Inhbb,Irx5,Isl1,Itga2,Jak2,Jarid2,Kcnc4,Kcnj2,Kcnma1,Klf4,Lep,Mdm4,Mef2a,Mtnr1b,Neurod1,Nos1ap,Npnt,Npvf,Nrg1,Oprd1,Oprk1,Pard3,Pawr,P…	ENSFDAG00000000295,ENSFDAG00000001117,ENSFDAG00000002080,ENSFDAG00000002995,ENSFDAG00000004453,ENSFDAG00000004696,ENSFDAG00000004743,ENSFDAG00000005130,ENSFDAG00000005202,ENSFDAG00000005550,ENSFDAG00000005671,ENSFDAG00000005741,ENSFDAG00000005746,ENSFDAG00000005908,ENSFDAG00000006049,ENSFDAG00000006135,ENSFDAG00000006162,ENSFDAG00000006204,ENSFDAG00000006229,ENSFDAG00000006694,ENSFDAG00000006801,…	Primed-enhancers_Liver_13060,Primed-enhancers_Liver_13411,Primed-enhancers_Liver_13419,Primed-enhancers_Liver_13470,Primed-enhancers_Liver_14369,Primed-enhancers_Liver_14771,Primed-enhancers_Liver_14921,Primed-enhancers_Liver_14954,Primed-enhancers_Liver_16134,Primed-enhancers_Liver_17039,Primed-enhancers_Liver_17763,Primed-enhancers_Liver_17781,Primed-enhancers_Liver_17791,Primed-enhancers_Liver…
GO:0042060	wound healing	1.48963	63	42.2924	0.0322	1.86566	42	22.5121	0.00179	Abat,Adamts18,Ano6,Aqp1,Cask,Cd44,Cd9,Clasp1,Col1a1,Dcbld2,Dst,F11,Fermt1,Fgf10,Gata4,Gja6,Hmgb1,Hmgcr,Igf1,Itgb6,Map3k1,Nrg1,Pdgfa,Plpp3,Ppard,Pparg,Prkce,Pten,Ptk2,Serpinf2,Smad3,Srsf6,Tafa5,Tfpi,Tgfb1,Tgfb2,Tpm1,Tpsab1,Tspan8,Ubash3b,Vil1,Wnt5a	ENSFDAG00000000042,ENSFDAG00000002140,ENSFDAG00000004129,ENSFDAG00000004696,ENSFDAG00000004743,ENSFDAG00000005671,ENSFDAG00000005761,ENSFDAG00000005862,ENSFDAG00000005890,ENSFDAG00000007714,ENSFDAG00000008083,ENSFDAG00000008711,ENSFDAG00000008823,ENSFDAG00000009240,ENSFDAG00000009317,ENSFDAG00000009788,ENSFDAG00000010167,ENSFDAG00000010527,ENSFDAG00000010764,ENSFDAG00000011249,ENSFDAG00000011525,…	Primed-enhancers_Liver_11446,Primed-enhancers_Liver_12421,Primed-enhancers_Liver_1740,Primed-enhancers_Liver_190,Primed-enhancers_Liver_199,Primed-enhancers_Liver_20094,Primed-enhancers_Liver_20737,Primed-enhancers_Liver_20961,Primed-enhancers_Liver_20962,Primed-enhancers_Liver_20965,Primed-enhancers_Liver_20966,Primed-enhancers_Liver_20967,Primed-enhancers_Liver_218,Primed-enhancers_Liver_21917,…
GO:1903672	positive regulation of sprouting angiogenesis	2.36721	15	6.33656	0.0323	3.01287	8	2.65527	0.0367	Dll1,Ghsr,Hmgb1,Jak1,Klf4,Smad1,Tjp1,Vegfa	ENSFDAG00000002748,ENSFDAG00000009317,ENSFDAG00000009944,ENSFDAG00000010886,ENSFDAG00000014165,ENSFDAG00000014421,ENSFDAG00000016072,ENSFDAG00000019741	Primed-enhancers_Liver_190,Primed-enhancers_Liver_199,Primed-enhancers_Liver_218,Primed-enhancers_Liver_31211,Primed-enhancers_Liver_32246,Primed-enhancers_Liver_45793,Primed-enhancers_Liver_45803,Primed-enhancers_Liver_45814,Primed-enhancers_Liver_45831,Primed-enhancers_Liver_50939,Primed-enhancers_Liver_50944,Primed-enhancers_Liver_50959,Primed-enhancers_Liver_52032,Primed-enhancers_Liver_64630…
GO:0007163	establishment or maintenance of cell polarity	1.46548	69	47.0836	0.0325	1.92489	44	22.8584	0.00067	Abl2,Actr3,Alpk2,Aqp1,Arhgap35,BC034090,Ccl19,Ccr7,Crb1,Crb2,Ctnna1,Cyp26b1,Dlg1,Dlg5,Dock2,Dock7,Dst,Ephb1,Exoc4,Fermt1,Frmd4a,Frmd4b,Gja6,Ift20,Igf1,Igf1r,Lhx2,Nphp3,Ophn1,Pard3,Pard3b,Parva,Plekhg3,Rab10,Rhobtb1,Rhod,Rictor,Rnd3,Snap91,Syne2,Tcirg1,Ttc8,Ust,Wnt5a	ENSFDAG00000000368,ENSFDAG00000000859,ENSFDAG00000001288,ENSFDAG00000002987,ENSFDAG00000003292,ENSFDAG00000004755,ENSFDAG00000005402,ENSFDAG00000005428,ENSFDAG00000005890,ENSFDAG00000006381,ENSFDAG00000007182,ENSFDAG00000007439,ENSFDAG00000007925,ENSFDAG00000008214,ENSFDAG00000008589,ENSFDAG00000008711,ENSFDAG00000009240,ENSFDAG00000009363,ENSFDAG00000009957,ENSFDAG00000010527,ENSFDAG00000011130,…	Primed-enhancers_Liver_10091,Primed-enhancers_Liver_12754,Primed-enhancers_Liver_1304,Primed-enhancers_Liver_1305,Primed-enhancers_Liver_1307,Primed-enhancers_Liver_15857,Primed-enhancers_Liver_15858,Primed-enhancers_Liver_15865,Primed-enhancers_Liver_15900,Primed-enhancers_Liver_15903,Primed-enhancers_Liver_16791,Primed-enhancers_Liver_16796,Primed-enhancers_Liver_21693,Primed-enhancers_Liver_21…
GO:0009790	embryo development	1.3105	127	96.9096	0.0325	1.44047	75	52.0664	0.0134	Ace,Acvr1,Adar,Add1,Akirin2,Angpt1,Apba2,Aplp2,Ar,Bcl2l11,Bmp2,Celf4,Chd7,Chrd,Chtop,Clasp1,Cntnap2,Crb2,Ctnnb1,Cul3,Dab2,Dlg1,Dlk1,Dll1,Dlx1,Dlx3,Dlx5,Dlx6,Exoc3l2,Fgfr1,Fgfr2,Foxp1,Gabpa,Gata4,Gja6,Gli2,Gli3,Gm28047,Gna12,Gtf2ird1,Hand2,Hba-a2,Hmgcr,Ino80d,Man2a1,Mgat1,Pitpnb,Plcb1,Psen1,Rad51b,Rictor,Runx1,Sall4,Sh3pxd2a,Sin3a,Slit2,Smad2,Smad3,Sox5,Sox6,Sp3,Ssr2,Tbx18,Tenm4,Tent5c,Tgfb3,Tpm1,…	ENSFDAG00000000042,ENSFDAG00000000528,ENSFDAG00000000548,ENSFDAG00000000810,ENSFDAG00000001153,ENSFDAG00000002080,ENSFDAG00000002280,ENSFDAG00000002392,ENSFDAG00000002748,ENSFDAG00000002894,ENSFDAG00000002901,ENSFDAG00000004346,ENSFDAG00000005217,ENSFDAG00000005671,ENSFDAG00000005748,ENSFDAG00000005827,ENSFDAG00000005890,ENSFDAG00000006135,ENSFDAG00000006826,ENSFDAG00000007110,ENSFDAG00000007182,…	Primed-enhancers_Liver_10356,Primed-enhancers_Liver_12443,Primed-enhancers_Liver_12958,Primed-enhancers_Liver_13060,Primed-enhancers_Liver_1354,Primed-enhancers_Liver_16024,Primed-enhancers_Liver_16027,Primed-enhancers_Liver_16028,Primed-enhancers_Liver_16029,Primed-enhancers_Liver_16036,Primed-enhancers_Liver_16311,Primed-enhancers_Liver_16500,Primed-enhancers_Liver_17189,Primed-enhancers_Liver_…
GO:1905205	positive regulation of connective tissue replacement	3.5168	8	2.27479	0.0333	8.66201	4	0.461786	0.00502	Klf6,Ppp3ca,Rock1,Rock2	ENSFDAG00000012484,ENSFDAG00000012934,ENSFDAG00000018891,ENSFDAG00000019290	Primed-enhancers_Liver_14369,Primed-enhancers_Liver_17577,Primed-enhancers_Liver_33969,Primed-enhancers_Liver_33980,Primed-enhancers_Liver_33981,Primed-enhancers_Liver_33986,Primed-enhancers_Liver_48967,Primed-enhancers_Liver_49002
GO:0022407	regulation of cell-cell adhesion	1.30784	129	98.6358	0.034	1.57125	78	49.642	0.00134	Abat,Abl2,Adamts18,Afdn,Ank3,Ap3b1,Arid1a,Arid1b,Arid2,Blk,Bmp2,Bmp4,Capn1,Cblb,Ccl19,Ccr7,Cd274,Cd44,Cd59b,Cd9,Cxcl12,Dlg1,Dlg5,Efna5,Efnb1,Ephb3,Ets1,Gli3,Hmgb1,Hspd1,Icos,Ifng,Igf1,Il6st,Itpkb,Jak1,Jak2,Klf4,Lep,Magi1,Magi2,Map2k5,Mdga1,Mex3b,Myo10,Nck1,Pawr,Peli1,Pik3r1,Plpp3,Ppp3ca,Prkcq,Pten,Ptk2,Rdx,Ripk2,Runx1,Skap1,Smad7,Smarca2,Smarce1,Socs6,Swap70,Tbx18,Tgfb1,Thy1,Tjp1,Tnfaip3,Tnfsf11,…	ENSFDAG00000000334,ENSFDAG00000002748,ENSFDAG00000004696,ENSFDAG00000004944,ENSFDAG00000005504,ENSFDAG00000005711,ENSFDAG00000005862,ENSFDAG00000005890,ENSFDAG00000006162,ENSFDAG00000006438,ENSFDAG00000006457,ENSFDAG00000007182,ENSFDAG00000007271,ENSFDAG00000007522,ENSFDAG00000007588,ENSFDAG00000007857,ENSFDAG00000008006,ENSFDAG00000008083,ENSFDAG00000008095,ENSFDAG00000008214,ENSFDAG00000008332,…	Primed-enhancers_Liver_12562,Primed-enhancers_Liver_1258,Primed-enhancers_Liver_1261,Primed-enhancers_Liver_12754,Primed-enhancers_Liver_17758,Primed-enhancers_Liver_17763,Primed-enhancers_Liver_190,Primed-enhancers_Liver_199,Primed-enhancers_Liver_19984,Primed-enhancers_Liver_19996,Primed-enhancers_Liver_20301,Primed-enhancers_Liver_20334,Primed-enhancers_Liver_20342,Primed-enhancers_Liver_20766…
GO:1905114	cell surface receptor signaling pathway involved in cell-cell signaling	1.29231	138	106.785	0.0342	1.8063	88	48.7185	5.78e-06	2210016L21Rik,Abl2,Alpk2,Amfr,Anks1b,App,Arntl,Atp6ap2,Bcl9,Bmp2,Bmp4,Btrc,Ccdc88c,Ccnd1,Cd44,Cdh2,Col1a1,Ctnnb1,Cul3,Daam1,Dab2,Dab2ip,Dact1,Ddx3x,Disc1,Dlx3,Dlx5,Fbxw11,Fermt1,Fgf10,Fgfr2,Fzd6,Fzd8,Fzd9,Gli2,Gli3,Gpc3,Gpc4,Gpc5,Hbp1,Hnf1a,Ift20,Invs,Isl1,Itga3,Jade1,Klf4,Kremen1,Lats1,Lrp5,Lypd6,Map3k1,Mcc,Mllt3,Myc,Nlk,Nphp3,Plpp3,Ppm1a,Ppp2r3a,Psen1,Pten,Rbms3,Rnf220,Rnf43,Rspo2,Ryk,Sema5a,Sh…	ENSFDAG00000000368,ENSFDAG00000000589,ENSFDAG00000001200,ENSFDAG00000002504,ENSFDAG00000003921,ENSFDAG00000004129,ENSFDAG00000004696,ENSFDAG00000004839,ENSFDAG00000005217,ENSFDAG00000005695,ENSFDAG00000005890,ENSFDAG00000006049,ENSFDAG00000006090,ENSFDAG00000006183,ENSFDAG00000007068,ENSFDAG00000007215,ENSFDAG00000007851,ENSFDAG00000007897,ENSFDAG00000008045,ENSFDAG00000008083,ENSFDAG00000008214,…	Primed-enhancers_Liver_10023,Primed-enhancers_Liver_10025,Primed-enhancers_Liver_11704,Primed-enhancers_Liver_12134,Primed-enhancers_Liver_12421,Primed-enhancers_Liver_12439,Primed-enhancers_Liver_12443,Primed-enhancers_Liver_12958,Primed-enhancers_Liver_13448,Primed-enhancers_Liver_13470,Primed-enhancers_Liver_14609,Primed-enhancers_Liver_15615,Primed-enhancers_Liver_15680,Primed-enhancers_Liver…
GO:0007162	negative regulation of cell adhesion	1.36929	95	69.3791	0.0342	1.54128	50	32.4405	0.0196	Abat,Abl2,Adamts18,Angpt1,Bcar1,Bmp2,Bmp4,Cask,Cblb,Cbll1,Cd274,Cd44,Cd9,Col1a1,Cxcl12,Dact2,Dlc1,Dlg1,Dlg5,Efna5,Epha4,Gli3,Hmgb1,Jak2,Klf4,Lamb1,Map2k5,Muc1,Pawr,Pde3b,Peli1,Pik3r1,Plxna1,Plxnb3,Pten,Ptk2,Rdx,Runx1,Sema5a,Sema6a,Smad7,Socs6,Srcin1,Swap70,Tgfb1,Tnfaip3,Tnr,Ubash3b,Vegfa,Zfp608	ENSFDAG00000002748,ENSFDAG00000004129,ENSFDAG00000004696,ENSFDAG00000005862,ENSFDAG00000006162,ENSFDAG00000006826,ENSFDAG00000007182,ENSFDAG00000007271,ENSFDAG00000007522,ENSFDAG00000007737,ENSFDAG00000008083,ENSFDAG00000008095,ENSFDAG00000008214,ENSFDAG00000009028,ENSFDAG00000009044,ENSFDAG00000009107,ENSFDAG00000009191,ENSFDAG00000009317,ENSFDAG00000010085,ENSFDAG00000010167,ENSFDAG00000010886,…	Primed-enhancers_Liver_12421,Primed-enhancers_Liver_12644,Primed-enhancers_Liver_14573,Primed-enhancers_Liver_14580,Primed-enhancers_Liver_14581,Primed-enhancers_Liver_14588,Primed-enhancers_Liver_17758,Primed-enhancers_Liver_17763,Primed-enhancers_Liver_1864,Primed-enhancers_Liver_1865,Primed-enhancers_Liver_1873,Primed-enhancers_Liver_190,Primed-enhancers_Liver_199,Primed-enhancers_Liver_20301,…
GO:0002065	columnar/cuboidal epithelial cell differentiation	1.64133	42	25.589	0.0342	2.21832	21	9.46662	0.00756	Abl2,Afdn,Bmp2,Bmp4,Cdh2,Clcn2,Ctnnb1,Dlg5,Dll1,Dlx3,Enam,Fam20c,Fgfr2,Foxp1,Gata4,Klf4,Neurod1,Nfib,Onecut1,Pdx1,Sox9	ENSFDAG00000003152,ENSFDAG00000005671,ENSFDAG00000006090,ENSFDAG00000006573,ENSFDAG00000008214,ENSFDAG00000009044,ENSFDAG00000009384,ENSFDAG00000010886,ENSFDAG00000010907,ENSFDAG00000011655,ENSFDAG00000012167,ENSFDAG00000012194,ENSFDAG00000012354,ENSFDAG00000012886,ENSFDAG00000014165,ENSFDAG00000014584,ENSFDAG00000014957,ENSFDAG00000017270,ENSFDAG00000018458,ENSFDAG00000019362,ENSFDAG00000020762	Primed-enhancers_Liver_12443,Primed-enhancers_Liver_13448,Primed-enhancers_Liver_13470,Primed-enhancers_Liver_21693,Primed-enhancers_Liver_22351,Primed-enhancers_Liver_22352,Primed-enhancers_Liver_22974,Primed-enhancers_Liver_28393,Primed-enhancers_Liver_31150,Primed-enhancers_Liver_31151,Primed-enhancers_Liver_31211,Primed-enhancers_Liver_34181,Primed-enhancers_Liver_3976,Primed-enhancers_Liver_…
GO:0048813	dendrite morphogenesis	1.46207	67	45.8253	0.0344	2.1655	36	16.6243	0.000332	Abl2,Actr3,Adgrb3,Afdn,Btbd3,Btbd3,Cask,Cdkl5,Chrnb2,Cntnap2,Cux1,Dact1,Dpysl5,Dtnbp1,Elavl4,Epha4,Fbxw8,Grip1,Hecw2,Hprt,Klf7,Map6,Mef2a,Myo5b,Nedd4l,Nrp1,Ppp3ca,Ptn,Rbfox2,Robo1,Rock2,Sdc2,Sipa1l1,Skor2,Tbc1d24,Vldlr	ENSFDAG00000000210,ENSFDAG00000000579,ENSFDAG00000004755,ENSFDAG00000005546,ENSFDAG00000005565,ENSFDAG00000006183,ENSFDAG00000006204,ENSFDAG00000006694,ENSFDAG00000007160,ENSFDAG00000007257,ENSFDAG00000007436,ENSFDAG00000007737,ENSFDAG00000007921,ENSFDAG00000007990,ENSFDAG00000008214,ENSFDAG00000009219,ENSFDAG00000010019,ENSFDAG00000010468,ENSFDAG00000011810,ENSFDAG00000012316,ENSFDAG00000012730,…	Primed-enhancers_Liver_1018,Primed-enhancers_Liver_1400,Primed-enhancers_Liver_1404,Primed-enhancers_Liver_1407,Primed-enhancers_Liver_14369,Primed-enhancers_Liver_15615,Primed-enhancers_Liver_16193,Primed-enhancers_Liver_16198,Primed-enhancers_Liver_16246,Primed-enhancers_Liver_16250,Primed-enhancers_Liver_18600,Primed-enhancers_Liver_18612,Primed-enhancers_Liver_18633,Primed-enhancers_Liver_186…
GO:1902533	positive regulation of intracellular signal transduction	1.21272	226	186.357	0.0347	1.34146	140	104.364	0.00417	Abl2,Abra,Ackr3,Adora3,Angpt1,App,Ar,Auts2,Auts2,Bank1,Bcl2l11,Bmp2,Bmp4,Braf,C1qtnf3,Calcr,Cbl,Ccl17,Ccl19,Ccr7,Cd44,Cdh2,Cdon,Crebbp,Csf3,Ctnnb1,Cxcl12,Dab2,Dab2ip,Ddx3x,Dgki,Dhx15,Dlg5,Dock2,Drd4,Eif2ak3,Epgn,Epha4,Esr1,Exoc4,Fgf10,Fgfr1,Fgfr2,Fshr,Fzd8,Gab1,Garem1,Gata4,Gipr,Hand2,Hipk2,Hmgb1,Hmgcr,Hnf1a,Igf1,Igf1r,Itpkb,Jak2,Klb,Lep,Lhcgr,Mad2l1,Map2k5,Map2k6,Map3k1,Map3k13,Map3k5,Map3k7,Map…	ENSFDAG00000000130,ENSFDAG00000000501,ENSFDAG00000000810,ENSFDAG00000001180,ENSFDAG00000001218,ENSFDAG00000002080,ENSFDAG00000002571,ENSFDAG00000002748,ENSFDAG00000003325,ENSFDAG00000003809,ENSFDAG00000003960,ENSFDAG00000004696,ENSFDAG00000004839,ENSFDAG00000004907,ENSFDAG00000005217,ENSFDAG00000005242,ENSFDAG00000005440,ENSFDAG00000005504,ENSFDAG00000005581,ENSFDAG00000005671,ENSFDAG00000005748,…	Primed-enhancers_Liver_10091,Primed-enhancers_Liver_11083,Primed-enhancers_Liver_11446,Primed-enhancers_Liver_12365,Primed-enhancers_Liver_12471,Primed-enhancers_Liver_12472,Primed-enhancers_Liver_12720,Primed-enhancers_Liver_12754,Primed-enhancers_Liver_13389,Primed-enhancers_Liver_13390,Primed-enhancers_Liver_13392,Primed-enhancers_Liver_13448,Primed-enhancers_Liver_13470,Primed-enhancers_Liver…
GO:0061311	cell surface receptor signaling pathway involved in heart development	2.15645	18	8.34704	0.0347	3.46481	10	2.88616	0.00666	Acvr1,Alpk2,Bmp2,Bmp4,Chrd,Ctnnb1,Dll1,Hand2,Tgfb1,Wnt5a	ENSFDAG00000000368,ENSFDAG00000005890,ENSFDAG00000007195,ENSFDAG00000008083,ENSFDAG00000009044,ENSFDAG00000009384,ENSFDAG00000009453,ENSFDAG00000011655,ENSFDAG00000012332,ENSFDAG00000014165	Primed-enhancers_Liver_21917,Primed-enhancers_Liver_22351,Primed-enhancers_Liver_22352,Primed-enhancers_Liver_28400,Primed-enhancers_Liver_31211,Primed-enhancers_Liver_35828,Primed-enhancers_Liver_35862,Primed-enhancers_Liver_40999,Primed-enhancers_Liver_41000,Primed-enhancers_Liver_43490,Primed-enhancers_Liver_43508,Primed-enhancers_Liver_43510,Primed-enhancers_Liver_43515,Primed-enhancers_Liver…
GO:0048646	anatomical structure formation involved in morphogenesis	1.18626	274	230.979	0.0354	1.56215	178	113.946	2.24e-07	1700123L14Rik,2210016L21Rik,Abl2,Ace,Ackr3,Acvr1,Adamts9,Add1,Adgrb1,Adgrb3,Adipor2,Aggf1,Ago2,Angpt1,Apaf1,Aqp1,Ar,Arhgap35,Arid1a,Atp8a2,Bcl2l11,Bmp2,Bmp4,Calcrl,Cd44,Cd59b,Cd9,Cdon,Cemip2,Cftr,Chrd,Clasp1,Col1a1,Crb1,Crb2,Ctnnb1,Cxcl12,Cxcr2,Dab2ip,Deaf1,Dicer1,Dlc1,Dll1,Dlx5,Dlx6,Dmrt2,Dusp4,Eif2ak3,Enah,Enam,Epas1,Epb41l3,Epgn,Ephb1,Ephb3,Ercc1,Ereg,Ets1,Exoc4,Fam20c,Fat3,Fgf10,Fgf3,Fgfr1,Fg…	ENSFDAG00000000042,ENSFDAG00000000093,ENSFDAG00000000501,ENSFDAG00000001188,ENSFDAG00000001321,ENSFDAG00000002080,ENSFDAG00000002523,ENSFDAG00000002571,ENSFDAG00000002748,ENSFDAG00000002894,ENSFDAG00000002987,ENSFDAG00000003104,ENSFDAG00000003357,ENSFDAG00000003999,ENSFDAG00000004129,ENSFDAG00000004341,ENSFDAG00000004662,ENSFDAG00000004696,ENSFDAG00000004743,ENSFDAG00000004759,ENSFDAG00000005217,…	Primed-enhancers_Liver_10617,Primed-enhancers_Liver_12159,Primed-enhancers_Liver_12161,Primed-enhancers_Liver_12421,Primed-enhancers_Liver_12562,Primed-enhancers_Liver_12616,Primed-enhancers_Liver_12958,Primed-enhancers_Liver_1304,Primed-enhancers_Liver_1305,Primed-enhancers_Liver_13060,Primed-enhancers_Liver_1307,Primed-enhancers_Liver_13448,Primed-enhancers_Liver_13470,Primed-enhancers_Liver_13…
GO:0006897	endocytosis	1.31958	119	90.18	0.0357	1.37551	74	53.7981	0.0333	Aak1,Ackr3,Add1,Angpt1,Ankfy1,Ano6,Ap2s1,Ap4e1,App,Arhgap21,Bin1,Bmp2k,Btbd9,Calcrl,Cbl,Cbll1,Ccl19,Ccr7,Cd9,Cttn,Cxcr2,Dab2,Dennd1a,Dennd1b,Dll1,Dock2,Drd4,Dtnbp1,Eea1,Ehbp1,Fchsd2,Gapvd1,Gpc3,Heatr5a,Itga2,Itsn2,Lmbrd1,Lrp5,Ly75,Magi2,Marchf3,Mtmr9,Neurl1b,Nostrin,Nrg1,Ophn1,Pard3,Pik3cg,Pparg,Ppp3ca,Pten,Rab31,Rab5a,Rab5c,Rabgap1l,Rin2,Rock1,Scara5,Sgip1,Sh3kbp1,Snap91,Snx18,Sorl1,Synj2,Synrg,…	ENSFDAG00000000498,ENSFDAG00000000786,ENSFDAG00000000985,ENSFDAG00000001493,ENSFDAG00000002748,ENSFDAG00000002934,ENSFDAG00000003429,ENSFDAG00000003882,ENSFDAG00000004075,ENSFDAG00000004696,ENSFDAG00000004743,ENSFDAG00000005550,ENSFDAG00000005631,ENSFDAG00000005862,ENSFDAG00000005890,ENSFDAG00000006373,ENSFDAG00000006444,ENSFDAG00000006458,ENSFDAG00000006826,ENSFDAG00000006956,ENSFDAG00000007035,…	Primed-enhancers_Liver_10091,Primed-enhancers_Liver_11296,Primed-enhancers_Liver_11956,Primed-enhancers_Liver_12754,Primed-enhancers_Liver_12790,Primed-enhancers_Liver_14098,Primed-enhancers_Liver_14102,Primed-enhancers_Liver_14588,Primed-enhancers_Liver_14627,Primed-enhancers_Liver_15149,Primed-enhancers_Liver_15153,Primed-enhancers_Liver_1720,Primed-enhancers_Liver_18633,Primed-enhancers_Liver_…
GO:0043408	regulation of MAPK cascade	1.23412	194	157.197	0.0357	1.48858	116	77.9264	0.000354	Abl2,Ace2,Ackr3,Angpt1,Apip,App,Ar,Atp6ap2,Bank1,Bmp2,Bmp4,Braf,C1qtnf3,Calcr,Ccl17,Ccl19,Ccr7,Cd44,Cdh2,Cdon,Cnksr3,Ctnnb1,Cxcl12,Dab2,Dab2ip,Dact1,Dlg1,Drd4,Dusp26,Dusp27,Dusp4,Dusp9,Epgn,Epha4,Ephb1,Esr1,Fgf10,Fgfr1,Fgfr2,Fshr,Fzd8,Gab1,Garem1,Gata4,Grik2,Hand2,Hipk2,Hmgb1,Hmgcr,Igf1,Igf1r,Jak2,Klb,Klf4,Lep,Map2k5,Map2k6,Map3k1,Map3k13,Map3k5,Map3k7,Map4k2,Mfhas1,Mid1,Nelfe,Nod1,Npnt,Nptn,Npy,…	ENSFDAG00000000130,ENSFDAG00000000501,ENSFDAG00000000810,ENSFDAG00000001180,ENSFDAG00000002080,ENSFDAG00000002571,ENSFDAG00000002748,ENSFDAG00000003809,ENSFDAG00000003960,ENSFDAG00000004696,ENSFDAG00000004743,ENSFDAG00000005166,ENSFDAG00000005217,ENSFDAG00000005242,ENSFDAG00000005440,ENSFDAG00000005504,ENSFDAG00000005537,ENSFDAG00000005581,ENSFDAG00000005671,ENSFDAG00000005890,ENSFDAG00000006090,…	Primed-enhancers_Liver_11083,Primed-enhancers_Liver_11446,Primed-enhancers_Liver_12365,Primed-enhancers_Liver_12754,Primed-enhancers_Liver_13389,Primed-enhancers_Liver_13390,Primed-enhancers_Liver_13392,Primed-enhancers_Liver_14369,Primed-enhancers_Liver_14627,Primed-enhancers_Liver_15615,Primed-enhancers_Liver_16311,Primed-enhancers_Liver_16500,Primed-enhancers_Liver_1864,Primed-enhancers_Liver_…
GO:0070371	ERK1 and ERK2 cascade	1.34588	104	77.273	0.0361	1.62081	61	37.6356	0.00308	Abl2,Ace2,Ackr3,Angpt1,Apip,App,Bmp2,Bmp4,Braf,C1qtnf3,Calcr,Ccl17,Ccl19,Cd44,Cnksr3,Cntnap2,Cxcl12,Dab2,Dab2ip,Dlg1,Dusp26,Dusp4,Dusp9,Epha4,Ephb1,Esr1,Fgf10,Fgfr2,Fshr,Garem1,Gata4,Hand2,Hmgb1,Hmgcr,Igf1,Klf4,Mfhas1,Myc,Nelfe,Nod1,Npnt,Nptn,Npy,Nrg1,Nrp1,P2ry1,Pdgfa,Phlpp1,Prkd2,Pten,Ptprr,Rap1a,Ripk2,Sema6a,Serpinf2,Sox9,Spry2,Tgfb1,Tnfsf11,Vegfa,Zfp36l1	ENSFDAG00000000130,ENSFDAG00000002748,ENSFDAG00000003809,ENSFDAG00000004696,ENSFDAG00000004839,ENSFDAG00000005504,ENSFDAG00000005537,ENSFDAG00000005671,ENSFDAG00000006826,ENSFDAG00000007182,ENSFDAG00000007439,ENSFDAG00000007737,ENSFDAG00000007922,ENSFDAG00000008083,ENSFDAG00000008214,ENSFDAG00000008260,ENSFDAG00000008823,ENSFDAG00000009044,ENSFDAG00000009317,ENSFDAG00000009440,ENSFDAG00000009453,…	Primed-enhancers_Liver_11446,Primed-enhancers_Liver_13448,Primed-enhancers_Liver_13470,Primed-enhancers_Liver_16024,Primed-enhancers_Liver_16027,Primed-enhancers_Liver_16028,Primed-enhancers_Liver_16029,Primed-enhancers_Liver_16036,Primed-enhancers_Liver_1864,Primed-enhancers_Liver_1865,Primed-enhancers_Liver_1873,Primed-enhancers_Liver_190,Primed-enhancers_Liver_199,Primed-enhancers_Liver_20094,…
GO:0072132	mesenchyme morphogenesis	2.07981	20	9.61625	0.0361	3.11833	9	2.88616	0.0209	Acvr1,Bmp2,Ctnnb1,Isl1,Mdm4,Smad2,Smad3,Sox9,Tgfb2	ENSFDAG00000002894,ENSFDAG00000006049,ENSFDAG00000007195,ENSFDAG00000009384,ENSFDAG00000011655,ENSFDAG00000012435,ENSFDAG00000012886,ENSFDAG00000014357,ENSFDAG00000021356	Primed-enhancers_Liver_13448,Primed-enhancers_Liver_13470,Primed-enhancers_Liver_20931,Primed-enhancers_Liver_3247,Primed-enhancers_Liver_36243,Primed-enhancers_Liver_36258,Primed-enhancers_Liver_36263,Primed-enhancers_Liver_40999,Primed-enhancers_Liver_41000,Primed-enhancers_Liver_43490,Primed-enhancers_Liver_43508,Primed-enhancers_Liver_43510,Primed-enhancers_Liver_43515,Primed-enhancers_Liver_…
GO:0010634	positive regulation of epithelial cell migration	1.45289	68	46.8032	0.0362	1.90142	36	18.9332	0.00334	Angpt1,Aqp1,Bcar1,Bmp4,Ccr6,Clasp1,Dicer1,Ets1,Fgf10,Fgfr1,Foxp1,Hdac7,Hdac9,Hmgb1,Ifng,Igf1,Irs1,Itga2,Itga3,Mapre2,Nrp1,Pik3cg,Plpp3,Prkce,Prkd2,Rin2,Rock2,Sash1,Sema5a,Sox9,Sparc,Tgfb1,Tgfb2,Vegfa,Vil1,Wnt5a	ENSFDAG00000000042,ENSFDAG00000001493,ENSFDAG00000002080,ENSFDAG00000002748,ENSFDAG00000004907,ENSFDAG00000005242,ENSFDAG00000005890,ENSFDAG00000006826,ENSFDAG00000007035,ENSFDAG00000008083,ENSFDAG00000009044,ENSFDAG00000009317,ENSFDAG00000009788,ENSFDAG00000010527,ENSFDAG00000010878,ENSFDAG00000011525,ENSFDAG00000012354,ENSFDAG00000012435,ENSFDAG00000012886,ENSFDAG00000012888,ENSFDAG00000013477,…	Primed-enhancers_Liver_10617,Primed-enhancers_Liver_12439,Primed-enhancers_Liver_12443,Primed-enhancers_Liver_13448,Primed-enhancers_Liver_13470,Primed-enhancers_Liver_14369,Primed-enhancers_Liver_14627,Primed-enhancers_Liver_14718,Primed-enhancers_Liver_14722,Primed-enhancers_Liver_14726,Primed-enhancers_Liver_17039,Primed-enhancers_Liver_1740,Primed-enhancers_Liver_190,Primed-enhancers_Liver_19…
GO:0044843	cell cycle G1/S phase transition	1.44162	71	49.25	0.0362	1.53741	41	26.6682	0.0378	Acvr1,Arid1a,Arid1b,Arid2,Cables1,Ccnd1,Ccnh,Cdkn2b,Cpsf3,Crebbp,Ctdspl,Dact1,Dcun1d3,Ddx3x,Dlg1,Dpf3,Fgf10,Fhl1,Inhba,Jade1,Klf4,Lats1,Mn1,Mnat1,Muc1,Myc,Plcb1,Pml,Ppp2ca,Ppp2ca,Ppp2r5c,Ppp3ca,Pten,Rbbp8,Rdx,Rrm1,Smarca2,Smarce1,Ube2e2,Usp26,Usp37	ENSFDAG00000000334,ENSFDAG00000003637,ENSFDAG00000004395,ENSFDAG00000004696,ENSFDAG00000004839,ENSFDAG00000004972,ENSFDAG00000005436,ENSFDAG00000005876,ENSFDAG00000005951,ENSFDAG00000006183,ENSFDAG00000006317,ENSFDAG00000006438,ENSFDAG00000007182,ENSFDAG00000007195,ENSFDAG00000007707,ENSFDAG00000007850,ENSFDAG00000008341,ENSFDAG00000010071,ENSFDAG00000010140,ENSFDAG00000010481,ENSFDAG00000010502,…	Primed-enhancers_Liver_10472,Primed-enhancers_Liver_12754,Primed-enhancers_Liver_14426,Primed-enhancers_Liver_15615,Primed-enhancers_Liver_15721,Primed-enhancers_Liver_16253,Primed-enhancers_Liver_16255,Primed-enhancers_Liver_16256,Primed-enhancers_Liver_16290,Primed-enhancers_Liver_16297,Primed-enhancers_Liver_17207,Primed-enhancers_Liver_1740,Primed-enhancers_Liver_17763,Primed-enhancers_Liver_…
GO:0030098	lymphocyte differentiation	1.34886	102	75.6196	0.0383	1.47888	63	42.5998	0.0162	Abl2,Ahr,Ap3b1,Arid1a,Arid1b,Arid2,Atp11c,Bcl11a,Bmp4,Braf,Ccl19,Ccr6,Ccr7,Cd44,Chd7,Ctnnb1,Cyp26b1,Dicer1,Dll1,Dnajb9,Dock10,Dock11,Drosha,Foxp1,Fzd8,Fzd9,Gli3,Hdac7,Hdac9,Hectd1,Hmgb1,Ifng,Itpkb,Lep,Lyl1,Nkx2-3,Onecut1,Patz1,Pik3r1,Plcl2,Pou1f1,Prex1,Ripk2,Rora,Rorc,Runx1,Satb1,Sh3rf1,Smad7,Smarca2,Smarce1,Sp3,Tcirg1,Tgfb1,Tnfaip3,Tox,Txk,Wnt10b,Zbtb16,Zfp36l1,Zfp608,Zfp609,Zmiz1	ENSFDAG00000000334,ENSFDAG00000000528,ENSFDAG00000001807,ENSFDAG00000005395,ENSFDAG00000005504,ENSFDAG00000005614,ENSFDAG00000005741,ENSFDAG00000006063,ENSFDAG00000006438,ENSFDAG00000006493,ENSFDAG00000006824,ENSFDAG00000007522,ENSFDAG00000008006,ENSFDAG00000008083,ENSFDAG00000008095,ENSFDAG00000008214,ENSFDAG00000008332,ENSFDAG00000008341,ENSFDAG00000009028,ENSFDAG00000009044,ENSFDAG00000009122,…	Primed-enhancers_Liver_12754,Primed-enhancers_Liver_14718,Primed-enhancers_Liver_14722,Primed-enhancers_Liver_14726,Primed-enhancers_Liver_14771,Primed-enhancers_Liver_15014,Primed-enhancers_Liver_15149,Primed-enhancers_Liver_16024,Primed-enhancers_Liver_16027,Primed-enhancers_Liver_16028,Primed-enhancers_Liver_16029,Primed-enhancers_Liver_16036,Primed-enhancers_Liver_17039,Primed-enhancers_Liver…
GO:0002053	positive regulation of mesenchymal cell proliferation	1.8041	28	15.5202	0.0385	3.93728	15	3.80974	0.000111	Chrd,Ctnnb1,Fgfr1,Fgfr2,Foxp1,Hmgb1,Irs1,Lrp5,Myc,Pdgfa,Sox9,Tbx18,Vegfa,Wnt2,Wnt5a	ENSFDAG00000002080,ENSFDAG00000002748,ENSFDAG00000004839,ENSFDAG00000005890,ENSFDAG00000007215,ENSFDAG00000008466,ENSFDAG00000009317,ENSFDAG00000009384,ENSFDAG00000011119,ENSFDAG00000012332,ENSFDAG00000012354,ENSFDAG00000012886,ENSFDAG00000014474,ENSFDAG00000018458,ENSFDAG00000018637	Primed-enhancers_Liver_13448,Primed-enhancers_Liver_13470,Primed-enhancers_Liver_190,Primed-enhancers_Liver_199,Primed-enhancers_Liver_2001,Primed-enhancers_Liver_2013,Primed-enhancers_Liver_218,Primed-enhancers_Liver_21917,Primed-enhancers_Liver_26005,Primed-enhancers_Liver_28400,Primed-enhancers_Liver_32246,Primed-enhancers_Liver_36630,Primed-enhancers_Liver_58274,Primed-enhancers_Liver_58279,P…
GO:0016055	Wnt signaling pathway	1.29092	134	103.802	0.0386	1.77415	85	47.9103	1.54e-05	2210016L21Rik,Abl2,Alpk2,Amfr,App,Arntl,Atp6ap2,Bcl9,Bmp2,Btrc,Ccdc88c,Ccnd1,Cd44,Cdh2,Col1a1,Ctnnb1,Cul3,Daam1,Dab2,Dab2ip,Dact1,Ddx3x,Disc1,Dlx3,Dlx5,Fbxw11,Fermt1,Fgf10,Fgfr2,Fzd6,Fzd8,Fzd9,Gli3,Gpc3,Gpc4,Gpc5,Hbp1,Hnf1a,Ift20,Invs,Isl1,Itga3,Jade1,Klf4,Kremen1,Lats1,Lrp5,Lypd6,Map3k1,Mcc,Mllt3,Myc,Nlk,Nphp3,Plpp3,Ppm1a,Ppp2r3a,Psen1,Pten,Rbms3,Rnf220,Rnf43,Rspo2,Ryk,Sema5a,Shisa2,Smad3,Sox9,S…	ENSFDAG00000000368,ENSFDAG00000000589,ENSFDAG00000001200,ENSFDAG00000002504,ENSFDAG00000003921,ENSFDAG00000004129,ENSFDAG00000004696,ENSFDAG00000004839,ENSFDAG00000005217,ENSFDAG00000005695,ENSFDAG00000005890,ENSFDAG00000006049,ENSFDAG00000006090,ENSFDAG00000006183,ENSFDAG00000007068,ENSFDAG00000007215,ENSFDAG00000007851,ENSFDAG00000007897,ENSFDAG00000008083,ENSFDAG00000008214,ENSFDAG00000008278,…	Primed-enhancers_Liver_10023,Primed-enhancers_Liver_10025,Primed-enhancers_Liver_11704,Primed-enhancers_Liver_12134,Primed-enhancers_Liver_12421,Primed-enhancers_Liver_12439,Primed-enhancers_Liver_12443,Primed-enhancers_Liver_12958,Primed-enhancers_Liver_13448,Primed-enhancers_Liver_13470,Primed-enhancers_Liver_14609,Primed-enhancers_Liver_15615,Primed-enhancers_Liver_15680,Primed-enhancers_Liver…
GO:0070167	regulation of biomineral tissue development	1.61279	41	25.4218	0.0415	2.1893	23	10.5056	0.00551	Acvr1,Acvr2a,Ank,Ano6,Asxl2,Bcor,Bmp2,Bmp2k,Bmp4,Cftr,Dicer1,Enam,Fam20c,Fzd9,Gja6,Ptn,Smad3,Sox9,Tent5a,Tgfb1,Vdr,Wnt10b,Wnt6	ENSFDAG00000001117,ENSFDAG00000003009,ENSFDAG00000005565,ENSFDAG00000006573,ENSFDAG00000007195,ENSFDAG00000007477,ENSFDAG00000007616,ENSFDAG00000008083,ENSFDAG00000008174,ENSFDAG00000008670,ENSFDAG00000009044,ENSFDAG00000009326,ENSFDAG00000010907,ENSFDAG00000011655,ENSFDAG00000012886,ENSFDAG00000013027,ENSFDAG00000014357,ENSFDAG00000015976,ENSFDAG00000017357,ENSFDAG00000019082,ENSFDAG00000019148,…	Primed-enhancers_Liver_13448,Primed-enhancers_Liver_13470,Primed-enhancers_Liver_14034,Primed-enhancers_Liver_17039,Primed-enhancers_Liver_1756,Primed-enhancers_Liver_22351,Primed-enhancers_Liver_22352,Primed-enhancers_Liver_25011,Primed-enhancers_Liver_27294,Primed-enhancers_Liver_27295,Primed-enhancers_Liver_27401,Primed-enhancers_Liver_27407,Primed-enhancers_Liver_27408,Primed-enhancers_Liver_…
GO:0045778	positive regulation of ossification	1.68893	35	20.7232	0.0426	2.47486	16	6.46501	0.00951	Acvr1,Acvr2a,Ano6,Asxl2,Bmp2,Bmp4,Fam20c,Fzd9,Ptn,Smad3,Tent5a,Thrb,Vdr,Wnt10b,Wnt5a,Zbtb16	ENSFDAG00000001117,ENSFDAG00000005565,ENSFDAG00000005890,ENSFDAG00000006573,ENSFDAG00000007195,ENSFDAG00000007477,ENSFDAG00000008006,ENSFDAG00000008670,ENSFDAG00000009044,ENSFDAG00000009326,ENSFDAG00000011655,ENSFDAG00000013027,ENSFDAG00000014357,ENSFDAG00000014810,ENSFDAG00000019148,ENSFDAG00000021455	Primed-enhancers_Liver_14034,Primed-enhancers_Liver_21312,Primed-enhancers_Liver_21317,Primed-enhancers_Liver_21346,Primed-enhancers_Liver_21350,Primed-enhancers_Liver_21381,Primed-enhancers_Liver_21386,Primed-enhancers_Liver_21917,Primed-enhancers_Liver_22351,Primed-enhancers_Liver_22352,Primed-enhancers_Liver_27294,Primed-enhancers_Liver_27295,Primed-enhancers_Liver_27401,Primed-enhancers_Liver…
GO:0016202	regulation of striated muscle tissue development	2.40797	13	5.39875	0.0432	3.54355	9	2.53982	0.00964	Bmp4,Cdon,Fgf3,Gja6,Hdac7,Hdac9,Jph2,Smad3,Tgfb1	ENSFDAG00000001188,ENSFDAG00000007610,ENSFDAG00000008083,ENSFDAG00000009044,ENSFDAG00000014357,ENSFDAG00000015721,ENSFDAG00000017357,ENSFDAG00000020943,ENSFDAG00000020997	Primed-enhancers_Liver_14718,Primed-enhancers_Liver_14722,Primed-enhancers_Liver_14726,Primed-enhancers_Liver_22351,Primed-enhancers_Liver_22352,Primed-enhancers_Liver_27401,Primed-enhancers_Liver_44687,Primed-enhancers_Liver_63848,Primed-enhancers_Liver_67499,Primed-enhancers_Liver_6894,Primed-enhancers_Liver_72128,Primed-enhancers_Liver_72130,Primed-enhancers_Liver_73480
GO:0030111	regulation of Wnt signaling pathway	1.32109	109	82.5077	0.0438	1.88305	65	34.5185	4.6e-05	2210016L21Rik,Abl2,Alpk2,Amfr,App,Arntl,Atp6ap2,Bmp2,Btrc,Ccdc88c,Cdh2,Col1a1,Ctnnb1,Dab2,Dab2ip,Dact1,Ddx3x,Disc1,Dlx5,Fermt1,Fgf10,Fgfr2,Fzd6,Fzd9,Gli3,Gpc3,Gpc5,Hnf1a,Ift20,Invs,Isl1,Itga3,Jade1,Kremen1,Lats1,Lypd6,Map3k1,Mcc,Mllt3,Nlk,Nphp3,Plpp3,Ppm1a,Ppp2r3a,Psen1,Rbms3,Rnf220,Rnf43,Rspo2,Sema5a,Shisa2,Smad3,Sox9,Stk3,Tbx18,Tgfb1,Tle1,Tnfaip3,Tnks,Trabd2b,Wnt10b,Wnt5a,Wwox,Wwtr1,Znrf3	ENSFDAG00000000368,ENSFDAG00000000589,ENSFDAG00000001200,ENSFDAG00000002504,ENSFDAG00000003921,ENSFDAG00000004129,ENSFDAG00000005217,ENSFDAG00000005695,ENSFDAG00000005890,ENSFDAG00000006049,ENSFDAG00000006090,ENSFDAG00000006183,ENSFDAG00000007068,ENSFDAG00000008083,ENSFDAG00000008214,ENSFDAG00000008278,ENSFDAG00000008466,ENSFDAG00000008493,ENSFDAG00000008711,ENSFDAG00000008742,ENSFDAG00000009028,…	Primed-enhancers_Liver_11704,Primed-enhancers_Liver_12134,Primed-enhancers_Liver_12421,Primed-enhancers_Liver_12439,Primed-enhancers_Liver_12443,Primed-enhancers_Liver_13448,Primed-enhancers_Liver_13470,Primed-enhancers_Liver_15615,Primed-enhancers_Liver_15680,Primed-enhancers_Liver_16311,Primed-enhancers_Liver_16881,Primed-enhancers_Liver_16886,Primed-enhancers_Liver_17758,Primed-enhancers_Liver…
GO:0046631	alpha-beta T cell activation	1.53514	49	31.9188	0.0449	1.72054	29	16.8552	0.0308	Abl2,Ap3b1,Braf,Cblb,Ccl19,Ccr7,Cd274,Cd44,Dock2,Foxp1,Gli3,Hmgb1,Ifng,Itpkb,Jak2,Myc,Nkx2-3,Prkcq,Ripk2,Rora,Rorc,Runx1,Satb1,Sh3rf1,Smad7,Tcirg1,Tgfb1,Txk,Zbtb16	ENSFDAG00000001807,ENSFDAG00000004839,ENSFDAG00000005395,ENSFDAG00000005504,ENSFDAG00000008006,ENSFDAG00000008083,ENSFDAG00000008214,ENSFDAG00000008332,ENSFDAG00000008423,ENSFDAG00000009122,ENSFDAG00000009317,ENSFDAG00000010085,ENSFDAG00000010878,ENSFDAG00000011166,ENSFDAG00000011815,ENSFDAG00000012280,ENSFDAG00000012354,ENSFDAG00000012995,ENSFDAG00000013585,ENSFDAG00000015157,ENSFDAG00000015596,…	Primed-enhancers_Liver_10091,Primed-enhancers_Liver_12754,Primed-enhancers_Liver_17758,Primed-enhancers_Liver_17763,Primed-enhancers_Liver_190,Primed-enhancers_Liver_199,Primed-enhancers_Liver_19984,Primed-enhancers_Liver_19996,Primed-enhancers_Liver_218,Primed-enhancers_Liver_26005,Primed-enhancers_Liver_29467,Primed-enhancers_Liver_29470,Primed-enhancers_Liver_30407,Primed-enhancers_Liver_32450…
GO:0030217	T cell differentiation	1.39099	78	56.0751	0.0464	1.5421	47	30.4779	0.0237	Abl2,Ap3b1,Arid1a,Arid1b,Arid2,Bcl11a,Bmp4,Braf,Ccl19,Ccr6,Ccr7,Cd44,Chd7,Ctnnb1,Cyp26b1,Dicer1,Drosha,Foxp1,Fzd8,Gli3,Hmgb1,Ifng,Itpkb,Lep,Nkx2-3,Patz1,Prex1,Ripk2,Rora,Rorc,Runx1,Satb1,Sh3rf1,Smad7,Smarca2,Smarce1,Sp3,Tcirg1,Tgfb1,Tox,Txk,Wnt10b,Zbtb16,Zfp36l1,Zfp608,Zfp609,Zmiz1	ENSFDAG00000000334,ENSFDAG00000000528,ENSFDAG00000001807,ENSFDAG00000005395,ENSFDAG00000005504,ENSFDAG00000005614,ENSFDAG00000006063,ENSFDAG00000006438,ENSFDAG00000006493,ENSFDAG00000007522,ENSFDAG00000008006,ENSFDAG00000008083,ENSFDAG00000008214,ENSFDAG00000008332,ENSFDAG00000008341,ENSFDAG00000009044,ENSFDAG00000009122,ENSFDAG00000009317,ENSFDAG00000009384,ENSFDAG00000010502,ENSFDAG00000010723,…	Primed-enhancers_Liver_12754,Primed-enhancers_Liver_16024,Primed-enhancers_Liver_16027,Primed-enhancers_Liver_16028,Primed-enhancers_Liver_16029,Primed-enhancers_Liver_16036,Primed-enhancers_Liver_17039,Primed-enhancers_Liver_17758,Primed-enhancers_Liver_17763,Primed-enhancers_Liver_190,Primed-enhancers_Liver_199,Primed-enhancers_Liver_19984,Primed-enhancers_Liver_19996,Primed-enhancers_Liver_217…
GO:0045321	leukocyte activation	1.2245	187	152.716	0.0464	1.27291	123	96.6288	0.0323	Abl2,Adora3,Ahr,Akirin2,Ap3b1,Aplf,App,Arid1a,Arid1b,Arid2,Atp11c,Bank1,Batf2,Bcl11a,Blk,Bmp4,Braf,Cblb,Ccl19,Ccr6,Ccr7,Cd180,Cd274,Cd44,Cd59b,Cftr,Chd7,Chrnb2,Cplx2,Ctnnb1,Cxcl12,Cxcr2,Cyp26b1,Dicer1,Dlg1,Dlg5,Dll1,Dnajb9,Dock10,Dock11,Dock2,Drosha,Efnb1,Ercc1,Fgf10,Foxp1,Fzd8,Fzd9,Gal,Gja6,Gli3,Gm20547,Hdac7,Hdac9,Hectd1,Hmgb1,Hprt,Hspd1,Icos,Ifng,Igf1,Il6st,Itgb6,Itgb8,Itpkb,Jak2,Lep,Lyl1,Mfha…	ENSFDAG00000000334,ENSFDAG00000000528,ENSFDAG00000001180,ENSFDAG00000001807,ENSFDAG00000003064,ENSFDAG00000003104,ENSFDAG00000004101,ENSFDAG00000004696,ENSFDAG00000004743,ENSFDAG00000004839,ENSFDAG00000004944,ENSFDAG00000005217,ENSFDAG00000005395,ENSFDAG00000005504,ENSFDAG00000005614,ENSFDAG00000005741,ENSFDAG00000005890,ENSFDAG00000006063,ENSFDAG00000006438,ENSFDAG00000006457,ENSFDAG00000006493,…	Primed-enhancers_Liver_10091,Primed-enhancers_Liver_10875,Primed-enhancers_Liver_1258,Primed-enhancers_Liver_1261,Primed-enhancers_Liver_12754,Primed-enhancers_Liver_14718,Primed-enhancers_Liver_14722,Primed-enhancers_Liver_14726,Primed-enhancers_Liver_14771,Primed-enhancers_Liver_15014,Primed-enhancers_Liver_15149,Primed-enhancers_Liver_16024,Primed-enhancers_Liver_16027,Primed-enhancers_Liver_1…
GO:0000902	cell morphogenesis	1.24046	171	137.852	0.0464	1.6739	103	61.533	1.54e-05	Actr3,Add1,Afdn,Ahr,Ap3b1,Ar,Arap1,Arhgap35,Arhgef2,Arhgef28,Asxl1,Atrn,Bcar1,Bcl11a,Braf,Cadm1,Capzb,Cask,Cd44,Cdh6,Cdkl5,Cfdp1,Cntnap2,Ctnnb1,Cul3,Cux1,Dab2,Dact2,Dlc1,Dlg1,Dnmbp,Efna5,Enam,Epb41,Epb41l2,Epb41l3,Epha4,Ephb3,Eps8,Fam171a1,Fat3,Fbxw8,Fmnl2,Fmnl3,Fndc3b,Fryl,Gna12,Grip1,Hrh2,Itgb6,Itgb7,Itsn2,Lamb1,Lats1,Map3k1,Map3k13,Map7,Myh14,Myo10,Myo5b,Nedd4l,Net1,Nrg1,Nrp1,Olfm4,Ophn1,P2ry1…	ENSFDAG00000000362,ENSFDAG00000000579,ENSFDAG00000002748,ENSFDAG00000002987,ENSFDAG00000002990,ENSFDAG00000003292,ENSFDAG00000003809,ENSFDAG00000003824,ENSFDAG00000004755,ENSFDAG00000005130,ENSFDAG00000005250,ENSFDAG00000005440,ENSFDAG00000005565,ENSFDAG00000005632,ENSFDAG00000005713,ENSFDAG00000005741,ENSFDAG00000005790,ENSFDAG00000005890,ENSFDAG00000005925,ENSFDAG00000006063,ENSFDAG00000006493,…	Primed-enhancers_Liver_10617,Primed-enhancers_Liver_12644,Primed-enhancers_Liver_14098,Primed-enhancers_Liver_14102,Primed-enhancers_Liver_14573,Primed-enhancers_Liver_14580,Primed-enhancers_Liver_14581,Primed-enhancers_Liver_14771,Primed-enhancers_Liver_1740,Primed-enhancers_Liver_17523,Primed-enhancers_Liver_17526,Primed-enhancers_Liver_1864,Primed-enhancers_Liver_1865,Primed-enhancers_Liver_18…
GO:0048662	negative regulation of smooth muscle cell proliferation	1.68295	33	19.6084	0.0464	2.42027	19	7.85037	0.00502	Ace2,Bmp2,Drd4,Esr1,Gna12,Ifng,Klf4,Pik3r1,Ppard,Pparg,Ppargc1a,Pten,Rbm10,Rgs5,Sf1,Tafa5,Tgfb3,Tnfaip3,Tpm1	ENSFDAG00000000810,ENSFDAG00000002328,ENSFDAG00000004696,ENSFDAG00000004743,ENSFDAG00000005659,ENSFDAG00000005761,ENSFDAG00000007922,ENSFDAG00000008095,ENSFDAG00000009028,ENSFDAG00000009833,ENSFDAG00000010764,ENSFDAG00000010878,ENSFDAG00000010886,ENSFDAG00000011655,ENSFDAG00000016532,ENSFDAG00000017588,ENSFDAG00000018919,ENSFDAG00000019132,ENSFDAG00000021251	Primed-enhancers_Liver_16500,Primed-enhancers_Liver_20301,Primed-enhancers_Liver_20334,Primed-enhancers_Liver_20342,Primed-enhancers_Liver_27106,Primed-enhancers_Liver_31591,Primed-enhancers_Liver_36807,Primed-enhancers_Liver_37845,Primed-enhancers_Liver_37854,Primed-enhancers_Liver_37882,Primed-enhancers_Liver_37890,Primed-enhancers_Liver_43490,Primed-enhancers_Liver_43508,Primed-enhancers_Liver…
GO:0048709	oligodendrocyte differentiation	1.63394	38	23.2566	0.0474	2.13584	18	8.4276	0.0209	Bmp4,Ctnnb1,Dicer1,Dlx1,Exoc4,Gli3,Lingo1,Nrg1,Ntrk2,Pparg,Ptn,Ptpra,Slc8a3,Sox5,Sox6,Sox9,Tenm4,Tnfrsf1b	ENSFDAG00000004743,ENSFDAG00000005565,ENSFDAG00000007598,ENSFDAG00000008883,ENSFDAG00000009044,ENSFDAG00000009384,ENSFDAG00000012199,ENSFDAG00000012886,ENSFDAG00000015477,ENSFDAG00000016244,ENSFDAG00000016628,ENSFDAG00000017218,ENSFDAG00000018863,ENSFDAG00000019969,ENSFDAG00000020001,ENSFDAG00000020944,ENSFDAG00000021287,ENSFDAG00000021387	Primed-enhancers_Liver_13448,Primed-enhancers_Liver_13470,Primed-enhancers_Liver_16134,Primed-enhancers_Liver_17039,Primed-enhancers_Liver_17758,Primed-enhancers_Liver_17763,Primed-enhancers_Liver_19238,Primed-enhancers_Liver_22351,Primed-enhancers_Liver_22352,Primed-enhancers_Liver_41623,Primed-enhancers_Liver_43341,Primed-enhancers_Liver_53938,Primed-enhancers_Liver_59723,Primed-enhancers_Liver…
GO:0060449	bud elongation involved in lung branching	2.57555	11	4.27093	0.0479	4.94972	4	0.808126	0.047	Bmp4,Fgf10,Fgfr2,Spry2	ENSFDAG00000009044,ENSFDAG00000017616,ENSFDAG00000017883,ENSFDAG00000018458	Primed-enhancers_Liver_20961,Primed-enhancers_Liver_20962,Primed-enhancers_Liver_20965,Primed-enhancers_Liver_20966,Primed-enhancers_Liver_20967,Primed-enhancers_Liver_22351,Primed-enhancers_Liver_22352,Primed-enhancers_Liver_24109,Primed-enhancers_Liver_24110,Primed-enhancers_Liver_66834,Primed-enhancers_Liver_66850
GO:0045598	regulation of fat cell differentiation	1.46712	58	39.5331	0.0487	1.87287	32	17.0861	0.00759	Arntl,Asxl1,Asxl2,Bmp2,Cds1,Dact1,Dlk1,Fndc3b,Fto,Igf1,Klf5,Lep,Lrp5,Mkx,Ppard,Pparg,Rarres2,Rora,Rorc,Runx1t1,Sh3pxd2b,Smad3,Stk3,Tgfb1,Trio,Vegfa,Wnt10b,Wnt5a,Wwtr1,Zbtb16,Zbtb7c,Zfp36l1	ENSFDAG00000001807,ENSFDAG00000002748,ENSFDAG00000004743,ENSFDAG00000005395,ENSFDAG00000005632,ENSFDAG00000005695,ENSFDAG00000005761,ENSFDAG00000005890,ENSFDAG00000006183,ENSFDAG00000007370,ENSFDAG00000008006,ENSFDAG00000008083,ENSFDAG00000008670,ENSFDAG00000008859,ENSFDAG00000010014,ENSFDAG00000010527,ENSFDAG00000011119,ENSFDAG00000011476,ENSFDAG00000011655,ENSFDAG00000013790,ENSFDAG00000014357,…	Primed-enhancers_Liver_14034,Primed-enhancers_Liver_15615,Primed-enhancers_Liver_16024,Primed-enhancers_Liver_16027,Primed-enhancers_Liver_16028,Primed-enhancers_Liver_16029,Primed-enhancers_Liver_16036,Primed-enhancers_Liver_17189,Primed-enhancers_Liver_21917,Primed-enhancers_Liver_23892,Primed-enhancers_Liver_23900,Primed-enhancers_Liver_23903,Primed-enhancers_Liver_23923,Primed-enhancers_Liver…
GO:0061045	negative regulation of wound healing	1.81427	26	14.3309	0.0492	2.26545	17	7.50403	0.0158	Abat,Adamts18,Cask,Cd9,Clasp1,F11,Gja6,Hmgcr,Pdgfa,Pten,Serpinf2,Smad3,Tafa5,Tfpi,Tpsab1,Tspan8,Ubash3b	ENSFDAG00000000042,ENSFDAG00000002140,ENSFDAG00000004696,ENSFDAG00000005862,ENSFDAG00000008823,ENSFDAG00000011249,ENSFDAG00000012779,ENSFDAG00000012941,ENSFDAG00000013039,ENSFDAG00000013126,ENSFDAG00000013438,ENSFDAG00000013725,ENSFDAG00000014357,ENSFDAG00000014474,ENSFDAG00000016422,ENSFDAG00000017357,ENSFDAG00000018919	Primed-enhancers_Liver_11446,Primed-enhancers_Liver_20094,Primed-enhancers_Liver_27106,Primed-enhancers_Liver_27923,Primed-enhancers_Liver_2809,Primed-enhancers_Liver_31413,Primed-enhancers_Liver_37845,Primed-enhancers_Liver_37854,Primed-enhancers_Liver_37882,Primed-enhancers_Liver_37890,Primed-enhancers_Liver_42079,Primed-enhancers_Liver_58274,Primed-enhancers_Liver_58279,Primed-enhancers_Liver_…
GO:0009611	response to wounding	1.35001	90	66.6664	0.0499	1.54679	55	35.5575	0.0128	Abat,Adamts18,Ano6,Aqp1,Braf,Cask,Cd44,Cd9,Clasp1,Col1a1,Dcbld2,Dst,Epha4,F11,Fermt1,Fgf10,Gata4,Gja6,Grin2a,Hmgb1,Hmgcr,Igf1,Igf1r,Itgb6,Jak2,Klf4,Kremen1,Map3k1,Nrep,Nrg1,Pdgfa,Plpp3,Ppard,Pparg,Prkce,Pten,Ptk2,Ptn,Serpinf2,Slc1a1,Smad3,Srsf6,Tafa5,Tfpi,Tgfb1,Tgfb2,Tnfaip3,Tnr,Tpm1,Tpsab1,Tspan8,Ubash3b,Vil1,Wnt5a,Zfp36l1	ENSFDAG00000000042,ENSFDAG00000002140,ENSFDAG00000004129,ENSFDAG00000004696,ENSFDAG00000004743,ENSFDAG00000005565,ENSFDAG00000005671,ENSFDAG00000005761,ENSFDAG00000005862,ENSFDAG00000005890,ENSFDAG00000006162,ENSFDAG00000006381,ENSFDAG00000007714,ENSFDAG00000007737,ENSFDAG00000008083,ENSFDAG00000008711,ENSFDAG00000008823,ENSFDAG00000009028,ENSFDAG00000009051,ENSFDAG00000009240,ENSFDAG00000009317,…	Primed-enhancers_Liver_11446,Primed-enhancers_Liver_12421,Primed-enhancers_Liver_16024,Primed-enhancers_Liver_16027,Primed-enhancers_Liver_16028,Primed-enhancers_Liver_16029,Primed-enhancers_Liver_16036,Primed-enhancers_Liver_1740,Primed-enhancers_Liver_1864,Primed-enhancers_Liver_1865,Primed-enhancers_Liver_1873,Primed-enhancers_Liver_190,Primed-enhancers_Liver_199,Primed-enhancers_Liver_20094,P…
