# Supplementary material for: Phylogenetic modeling of enhancer shifts in African mole-rats reveals regulatory changes associated with tissue-specific traits
Source: HighWire-hosted journal article supplement (doi:10.1101/gr.277715.123), 2023-08-25
Supplement: Supplemental_Table_S8.xlsx [file Supplemental_Table_S8.xlsx]

## Sheet: Liver enhancers up guinea pig
GO	Name	Binom Enrichment	# foreground regions	# expected regions	Binom BH p-value	Hyper Enrichment	# foreground genes	# expected genes	Hyper BH p-value	Genes
GO:0030097	hemopoiesis	1.62081	620	382.524	1.39e-27	1.34823	186	137.958	0.000128	Abcb10,Acvr1b,Acvr2a,Ada,Ager,Ahctf1,Ahr,Angpt1,Ankrd54,Apc,Apcs,Arid1b,Atg7,Bcl2,Bcr,Bmp4,Car2,Card11,Ccl5,Ccr5,Ccr7,Cd101,Cd27,Cd34,Cd4,Cd40lg,Cd44,Cd46,Cd74,Cd83,Cdk13,Cdk6,Cebpa,Cldn18,Creb1,Csf1,Csf1r,Ctnnb1,Ctnnbip1,Cyp26b1,Dcstamp,Dicer1,Drosha,Dusp10,Egr3,Epas1,Epor,Ercc1,Ets1,Evi2,Fadd,Fbxw7,Fes,Flt3l,Fos,Foxj1,Foxn1,Foxp1,Foxp3,Gabpa,Gata3,Gfi1,Gimap5,Gli3,Gm9774,Gpr68,Gsk3b,H4c17,Hax1,…
GO:0048534	hematopoietic or lymphoid organ development	1.56349	679	434.286	1.82e-26	1.36427	214	156.861	1.22e-05	Abcb10,Acvr1b,Acvr2a,Ada,Adam17,Ager,Ahctf1,Ahr,Angpt1,Ankrd54,Apc,Apcs,Arid1b,Atg7,Barx1,Bcl2,Bcl2l11,Bcr,Bmp4,Car2,Card11,Ccl5,Ccnb2,Ccr5,Ccr7,Cd101,Cd27,Cd34,Cd4,Cd40lg,Cd44,Cd46,Cd74,Cd83,Cdk13,Cdk6,Cebpa,Cited2,Cldn18,Creb1,Csf1,Csf1r,Ctnnb1,Ctnnbip1,Cxcl13,Cxcr5,Cyp26b1,Dcstamp,Dicer1,Drosha,Dusp10,Egr3,Epas1,Ephb3,Epor,Ercc1,Ets1,Evi2,Fadd,Fbxw7,Fes,Fgf3,Flt3l,Fos,Foxj1,Foxn1,Foxp1,Foxp3,G…
GO:0150115	cell-substrate junction organization	2.36147	186	78.7645	6.42e-22	1.75507	51	29.0587	0.00034	Actn1,Actn3,Acvrl1,Apod,Arf6,Bcas3,Bcl2,Bcr,Clasp1,Col17a1,Coro2b,Cttn,Dst,Dusp22,Efna5,Enpp2,Epb41l5,Epha3,Fermt2,Fmn1,Grem1,Iqsec1,Itga2,Itgav,Itgb3,Itgb4,Kdr,Lims1,Lrp1,Macf1,Mapre2,Nrp1,Pdpk1,Pik3r1,Ppm1f,Pten,Ptk2,Ptprk,Pxn,Rab8b,Rac1,Rhod,Slk,Sorbs1,Src,Taok2,Tek,Tln1,Tns1,Vegfa,Whamm
GO:0002521	leukocyte differentiation	1.51811	623	410.38	3.42e-21	1.25875	201	159.682	0.00313	Abl2,Ada,Adam17,Ager,Ahr,Apc,Apcs,Arid1b,Atf2,Bcl11a,Bcl2,Bmp4,Calcr,Camk4,Car2,Card11,Ccl5,Ccr5,Ccr7,Cd101,Cd27,Cd4,Cd40lg,Cd44,Cd46,Cd74,Cd83,Cdk6,Cebpa,Chd7,Cited2,Cldn18,Cracr2a,Creb1,Csf1,Csf1r,Ctnnb1,Ctnnbip1,Cyp26b1,Dcstamp,Dhrs7b,Dicer1,Dnajb9,Dock10,Dock11,Drosha,Dusp10,Egr3,Epha2,Evi2,F2rl1,Fadd,Fbxw7,Fes,Flt3l,Fnip1,Fos,Foxj1,Foxn1,Foxp1,Foxp3,Fzd5,Gab2,Gata3,Gimap1,Gimap5,Gli3,Gm9774,…
GO:1903131	mononuclear cell differentiation	1.57315	511	324.826	6.66e-20	1.26476	157	124.134	0.00954	Abl2,Ada,Adam17,Ager,Ahr,Apc,Apcs,Arid1b,Atf2,Bcl11a,Bcl2,Bmp4,Camk4,Card11,Ccr5,Ccr7,Cd27,Cd4,Cd40lg,Cd44,Cd46,Cd74,Cd83,Cdk6,Chd7,Cracr2a,Csf1,Ctnnb1,Ctnnbip1,Cyp26b1,Dcstamp,Dicer1,Dnajb9,Dock10,Dock11,Drosha,Dusp10,Egr3,F2rl1,Fadd,Fes,Flt3l,Fnip1,Foxj1,Foxn1,Foxp1,Foxp3,Fzd5,Gata3,Gimap1,Gimap5,Gli3,Gm9774,Gpr68,Gpr89,Hdac7,Hdac9,Hectd1,Hlx,Id2,Ifi203,Ighg1,Ihh,Il12a,Il12b,Il15,Il15ra,Il2rg,I…
GO:1903706	regulation of hemopoiesis	1.56867	497	316.829	3.91e-19	1.31729	152	115.389	0.00213	Abcb10,Acvr1b,Acvr2a,Ada,Ager,Ankrd54,Apc,Apcs,Arid1b,Atg7,Bmp4,Car2,Card11,Ccl5,Ccr5,Ccr7,Cd101,Cd27,Cd4,Cd40lg,Cd44,Cd46,Cd74,Cd83,Cdk6,Cebpa,Cldn18,Creb1,Csf1,Csf1r,Ctnnb1,Ctnnbip1,Cyp26b1,Dcstamp,Dicer1,Drosha,Dusp10,Egr3,Ets1,Evi2,Fadd,Fbxw7,Fes,Flt3l,Fos,Foxj1,Foxn1,Foxp1,Foxp3,Gabpa,Gata3,Gimap5,Gli3,Gm9774,Gpr68,Gsk3b,H4c17,Hax1,Hif1a,Hlx,Hspa9,Id2,Ihh,Il12a,Il12b,Il15,Il15ra,Il2rg,Il34,I…
GO:0030036	actin cytoskeleton organization	1.44629	660	456.339	6.53e-18	1.43887	246	170.967	8.8e-09	Abi2,Abl2,Ablim3,Abr,Actc1,Actn1,Actn3,Actr3,Akap11,Akap13,Amot,Amotl1,Antxr1,Ap1ar,Aqp1,Arap1,Arf6,Arfgef3,Arhgap18,Arhgap26,Arhgap35,Arhgef10l,Arhgef17,Arhgef5,Arpc5,Atp2c1,Atxn3,Auts2,Auts2,Bag4,Baiap2l1,Baiap2l2,Bbs4,Bcas3,Bcr,Bin1,Brsk2,Bst1,Capza2,Ccn2,Ccr7,Cdc42bpa,Cdc42ep2,Cdc42ep3,Cit,Clasp1,Cldn19,Cnn1,Cnn3,Coro2b,Crk,Csf1r,Cttn,Cttnbp2,Cul3,Cxadr,Cyfip1,Cyria,Cyrib,Daam1,Daam2,Dbn1,Dia…
GO:0030029	actin filament-based process	1.40032	727	519.167	9.73e-17	1.44504	276	190.998	1.23e-09	Abcc9,Abi2,Abl2,Ablim3,Abr,Acap2,Acta2,Actc1,Actn1,Actn3,Actr3,Akap11,Akap13,Amot,Amotl1,Ank2,Antxr1,Ap1ar,Aqp1,Arap1,Arf6,Arfgef3,Arhgap18,Arhgap26,Arhgap35,Arhgef10l,Arhgef17,Arhgef5,Arpc5,Atp1a1,Atp2c1,Atxn3,Auts2,Auts2,Bag4,Baiap2l1,Baiap2l2,Bbs4,Bcas3,Bcr,Bin1,Brsk2,Bst1,Cacna1c,Camk2d,Capza2,Ccn2,Ccr7,Cdc42bpa,Cdc42ep2,Cdc42ep3,Cit,Clasp1,Cldn19,Cnn1,Cnn3,Coro2b,Crk,Csf1r,Ctnna3,Cttn,Cttnbp…
GO:1902105	regulation of leukocyte differentiation	1.59253	407	255.568	1.92e-16	1.3591	125	91.9723	0.00208	Ada,Ager,Apc,Apcs,Arid1b,Bmp4,Car2,Card11,Ccl5,Ccr5,Ccr7,Cd101,Cd27,Cd4,Cd40lg,Cd44,Cd46,Cd74,Cd83,Cdk6,Cldn18,Creb1,Csf1,Csf1r,Ctnnb1,Ctnnbip1,Cyp26b1,Dcstamp,Dicer1,Drosha,Dusp10,Egr3,Evi2,Fadd,Fbxw7,Fes,Flt3l,Fos,Foxj1,Foxn1,Foxp1,Foxp3,Gata3,Gimap5,Gli3,Gm9774,Gpr68,Gsk3b,Hax1,Hlx,Id2,Ihh,Il12a,Il12b,Il15,Il15ra,Il2rg,Il34,Inpp4b,Irf1,Itgb3,Jak3,Jun,Kitl,Lag3,Lef1,Lif,Mitf,Mtor,Myc,Ndfip1,Nf1…
GO:0030224	monocyte differentiation	2.8668	93	32.4403	1.37e-15	2.785	22	7.89946	9.16e-06	Apcs,Bmp4,Cd4,Cd74,Cdk6,Csf1,Ctnnbip1,Dcstamp,Fes,Foxp1,Gpr68,Ifi203,Il34,Jun,Med1,Mef2c,Myc,Pparg,Sp3,Thoc5,Vegfa,Zfp36l1
GO:0048660	regulation of smooth muscle cell proliferation	1.71783	290	168.818	3.33e-15	1.55323	78	50.218	0.000459	Ace2,Adamts1,Ager,Apln,Apod,Bmp2,Bmp4,Bmpr2,C3ar1,Calcrl,Camk2d,Ccl5,Cdkn1a,Cnn1,Ctnnb1,Ctnnbip1,Dbh,Ddr2,Efemp2,Ern1,Esr1,Fgf9,Fgfr2,Flt1,Foxj2,Foxp1,Frs2,Gna12,Gnai2,Gnai3,Gsk3b,Hif1a,Hpgd,Id2,Igf1,Igf1r,Igfbp5,Il12a,Il12b,Il15,Ilk,Itga2,Itgb3,Jun,Klf4,Mdm2,Mef2c,Mef2d,Mmp9,Mnat1,Mtor,Myc,Nampt,Nf1,Nos3,Npr3,Nr4a3,P2ry6,Pdgfrb,Pik3r1,Pparg,Ppargc1a,Pten,Ptgs2,Ptk2,S1pr1,Smpd3,Src,Tacr1,Tgfb3,Tg…
GO:0002684	positive regulation of immune system process	1.36477	745	545.879	6.95e-15	1.17064	287	245.165	0.0169	A2m,Abl2,Ada,Adam17,Ager,Akirin2,Ankrd17,Apcs,App,Arg1,Arid1b,Atad5,Bag6,Bcl10,Bcl2,Bmx,Bst1,C3ar1,C8a,C8b,Cacnb3,Cadm1,Car2,Card11,Cblb,Ccdc88b,Ccl5,Ccr5,Ccr7,Cd101,Cd177,Cd226,Cd247,Cd27,Cd274,Cd37,Cd4,Cd40lg,Cd44,Cd46,Cd74,Cd81,Cd83,Cd84,Cd86,Cdkn1a,Cebpa,Cftr,Coch,Colec10,Creb1,Creb3,Crp,Csf1,Csf1r,Ctnnbip1,Ctsc,Cxcl12,Cxcl13,Cyrib,Dcstamp,Ddx1,Ddx58,Ddx60,Dennd1b,Dgkz,Dhx36,Dnajb9,Dnm1l,Dusp…
GO:0045321	leukocyte activation	1.34171	816	608.18	7.78e-15	1.14823	299	260.4	0.0365	Abl2,Abr,Ada,Adam17,Adora2a,Ager,Ahr,Akirin2,Apbb1ip,Apc,App,Arg1,Arid1b,Atad5,Atf2,Bag6,Bank1,Bcl10,Bcl11a,Bcl2,Bcr,Bid,Bmp4,Bst1,Camk4,Card11,Casp3,Cblb,Ccdc88b,Ccl5,Ccr5,Ccr7,Cd177,Cd180,Cd2,Cd209a,Cd226,Cd27,Cd274,Cd37,Cd3d,Cd4,Cd40lg,Cd44,Cd46,Cd48,Cd74,Cd81,Cd83,Cd84,Cd86,Cdk6,Cdkn1a,Cebpa,Cftr,Chd7,Chrna4,Cracr2a,Crip3,Cst7,Ctnnb1,Ctsc,Cxadr,Cxcl12,Cxcr4,Cxcr5,Cyp26b1,Cyrib,Dcstamp,Dicer1,…
GO:0002573	myeloid leukocyte differentiation	1.70164	290	170.424	8.34e-15	1.50476	90	59.8102	0.000455	Apc,Apcs,Bmp4,Calcr,Camk4,Car2,Ccl5,Ccr7,Cd101,Cd4,Cd74,Cdk6,Cebpa,Cited2,Cldn18,Creb1,Csf1,Csf1r,Ctnnb1,Ctnnbip1,Dcstamp,Dhrs7b,Epha2,Evi2,F2rl1,Fadd,Fbxw7,Fes,Fos,Foxp1,Gab2,Gata3,Gimap5,Gpc3,Gpr68,Gsk3b,Hax1,Id2,Ifi203,Il12b,Il15,Il34,Inpp4b,Irf4,Itgb3,Itgb6,Jun,Junb,Kdm1a,Kit,Kitl,L3mbtl3,Lef1,Lif,Ltbr,Med1,Mef2c,Mitf,Mtor,Myc,Ndfip1,Nf1,Nfatc1,Nkx2-3,Notch2,Pias3,Pik3r1,Plcb1,Pou4f2,Pparg,Pp…
GO:0097435	supramolecular fiber organization	1.38994	667	479.877	1.13e-14	1.26488	263	207.925	0.00034	Abi1,Abi2,Abl2,Acta1,Actc1,Actn1,Actr3,Adamts12,Akap13,Anxa2,Ap1ar,Apc,App,Arap1,Arf6,Arhgap18,Arhgap35,Arhgef10l,Arhgef2,Arhgef5,Arpc5,Atxn7,Bag4,Baiap2l1,Baiap2l2,Bbs4,Bcl2,Bfsp1,Bfsp2,Bid,Bin1,Camsap1,Capza2,Ccdc88b,Ccn2,Ccsap,Cdc42ep2,Cdc42ep3,Cdh5,Clasp1,Clip3,Col14a1,Col1a2,Col2a1,Col3a1,Coro2b,Coro6,Cryaa,Ctnna1,Ctnna3,Cttn,Cul3,Cyfip1,Cyp1b1,Cyria,Cyrib,Daam2,Dbn1,Ddr2,Diaph1,Diaph3,Dlg1,…
GO:0007015	actin filament organization	1.51109	446	295.151	1.33e-14	1.46243	177	121.031	7.93e-07	Abi1,Abi2,Abl2,Acta1,Actc1,Actn1,Actr3,Ap1ar,Arap1,Arf6,Arhgap18,Arhgap35,Arhgef10l,Arhgef2,Arhgef5,Arpc5,Bag4,Baiap2l1,Baiap2l2,Bbs4,Bcl2,Bin1,Capza2,Ccn2,Cdc42ep2,Cdc42ep3,Clasp1,Coro2b,Coro6,Cryaa,Ctnna1,Ctnna3,Cttn,Cul3,Cyfip1,Cyria,Cyrib,Daam2,Dbn1,Diaph1,Diaph3,Dlg1,Dpysl3,Dstn,Elmo1,Elmo2,Elmo3,Epha1,Eps8,F11r,F2rl1,Fam171a1,Fat1,Fchsd2,Fer,Fermt2,Fhdc1,Fhod3,Fmn1,Fscn1,Gas2l3,Ghsr,Hax1,Hi…
GO:0007044	cell-substrate junction assembly	2.14925	150	69.7919	1.5e-14	1.68092	46	27.366	0.00213	Actn1,Actn3,Acvrl1,Apod,Bcas3,Bcl2,Bcr,Clasp1,Col17a1,Coro2b,Cttn,Dst,Dusp22,Efna5,Enpp2,Epb41l5,Epha3,Fermt2,Fmn1,Grem1,Itga2,Itgav,Itgb3,Itgb4,Kdr,Lims1,Lrp1,Macf1,Nrp1,Pdpk1,Ppm1f,Pten,Ptk2,Ptprk,Pxn,Rac1,Rhod,Slk,Sorbs1,Src,Taok2,Tek,Tln1,Tns1,Vegfa,Whamm
GO:0048659	smooth muscle cell proliferation	1.68552	294	174.426	1.5e-14	1.52454	80	52.475	0.000693	Ace2,Adamts1,Ager,Apln,Apod,Bmp2,Bmp4,Bmpr2,C3ar1,Calcrl,Camk2d,Ccl5,Ccn3,Cdkn1a,Cnn1,Ctnnb1,Ctnnbip1,Dbh,Ddr2,Ednra,Efemp2,Ern1,Esr1,Fgf9,Fgfr2,Flt1,Foxj2,Foxp1,Frs2,Gna12,Gnai2,Gnai3,Gsk3b,Hif1a,Hpgd,Id2,Igf1,Igf1r,Igfbp5,Il12a,Il12b,Il15,Ilk,Itga2,Itgb3,Jun,Klf4,Mdm2,Mef2c,Mef2d,Mmp9,Mnat1,Mtor,Myc,Nampt,Nf1,Nos3,Npr3,Nr4a3,P2ry6,Pdgfrb,Pik3r1,Pparg,Ppargc1a,Pten,Ptgs2,Ptk2,S1pr1,Smpd3,Src,Tac…
GO:0001816	cytokine production	1.39153	640	459.924	3.45e-14	1.18923	257	216.107	0.0129	Abcc8,Abl2,Adam17,Adam33,Adra2a,Afap1l2,Ager,Akap12,Akirin2,Alox5,Angpt1,Apod,App,Aqp4,Arfgef2,Arg1,Arhgef2,Ash1l,Atf2,Atg5,Atp2b1,Atp6ap2,Bank1,Bcl10,C1qtnf3,C3ar1,Cadm1,Card11,Ccbe1,Ccdc88b,Ccl5,Ccm2l,Ccr5,Ccr7,Cd2,Cd200r2,Cd226,Cd247,Cd27,Cd274,Cd34,Cd4,Cd40lg,Cd46,Cd74,Cd81,Cd83,Cd84,Clec9a,Col3a1,Creb1,Crebbp,Crp,Csf1r,Cyp1b1,Cyrib,Dbh,Ddx1,Ddx3x,Ddx58,Dennd1b,Dhx36,Dicer1,Dlg1,Eif2ak3,Elf1,…
GO:0030155	regulation of cell adhesion	1.32025	855	647.607	4.05e-14	1.38051	296	214.414	1.54e-08	Abi3bp,Abl2,Acer2,Acvrl1,Ada,Adora2a,Afdn,Ager,Agr2,Alox5,Angpt1,Ank3,Ap1ar,Apbb1ip,Apc,Apod,Arg1,Arid1b,Ass1,Atxn3,Bag4,Bcas3,Bcl10,Bcl2,Bmp2,Bmp4,Bst1,Card11,Cask,Casp3,Cblb,Cbll1,Ccdc80,Ccdc88b,Ccl5,Ccm2l,Ccr5,Ccr7,Cd27,Cd274,Cd37,Cd4,Cd40lg,Cd44,Cd46,Cd74,Cd81,Cd83,Cd86,Cdk6,Celsr2,Chrd,Chst2,Cited2,Clasp1,Col8a1,Coro2b,Crk,Csf1,Cxcl12,Cxcl13,Cxcr4,Cyp1b1,Cyrib,Cyth3,Cytip,Dab1,Dab2,Dab2,Dag1…
GO:0030099	myeloid cell differentiation	1.5253	405	265.521	8.83e-14	1.27643	130	101.847	0.0154	Abcb10,Actn1,Acvr1b,Acvr2a,Ankrd54,Apc,Apcs,Bmp4,Calcr,Camk4,Car2,Casp3,Ccl5,Ccr7,Cd101,Cd4,Cd74,Cdk5rap3,Cdk6,Cebpa,Cited2,Cldn18,Creb1,Csf1,Csf1r,Ctnnb1,Ctnnbip1,Dcstamp,Dhrs7b,Dyrk3,Epas1,Epha2,Ets1,Evi2,F2rl1,Fadd,Fbxw7,Fech,Fes,Fos,Foxp1,Gab2,Gabpa,Gata3,Gimap5,Gpc3,Gpr68,Gsk3b,H4c17,Hax1,Hif1a,Hspa9,Id2,Ifi203,Il12b,Il15,Il34,Inhba,Inpp4b,Irf4,Itgb3,Itgb6,Jag1,Jak3,Jun,Junb,Kat6a,Kcnq1,Kdm1…
GO:0009725	response to hormone	1.42806	540	378.135	1.12e-13	1.26443	183	144.729	0.00444	Abhd2,Acvr1c,Adh1,Adra1a,Adra2a,Agl,Ahsg,Akt3,Aldh3a1,Aldob,Aqp1,Ar,Arsb,Ass1,Atp1a1,Atp2a1,Atp2a2,Atp2b1,Bbs4,Bcas3,Bche,Bcl2,Bmp4,Cacybp,Cacybp,Calcr,Ccnd1,Ccr7,Cdo1,Cited2,Cntnap2,Col3a1,Cpn1,Creb1,Crk,Crls1,Cry1,Cry2,Ctnnb1,Cyfip1,Cyp11a1,Dab2,Dab2,Ednra,Ednrb,Efna5,Epha3,Esr1,Fbxo32,Fer,Fhl2,Gata4,Gata6,Gatm,Gclc,Gdnf,Ghrhr,Ghsr,Gnai2,Gnrh1,Gpld1,Grb14,Gsk3b,Hdac9,Hsd3b4,Igf1,Igf1r,Igf2,Ikbk…
GO:0042110	T cell activation	1.43464	529	368.733	1.14e-13	1.24575	181	145.294	0.00888	Abl2,Ada,Adam17,Adora2a,Ager,Apbb1ip,Apc,Arg1,Arid1b,Atf2,Bcl10,Bcl11a,Bcl2,Bid,Bmp4,Card11,Casp3,Cblb,Ccdc88b,Ccl5,Ccr5,Ccr7,Cd2,Cd209a,Cd27,Cd274,Cd37,Cd3d,Cd4,Cd40lg,Cd44,Cd46,Cd48,Cd74,Cd81,Cd83,Cd84,Cd86,Cdk6,Chd7,Cracr2a,Crip3,Ctnnb1,Cxadr,Cxcl12,Cxcr4,Cyp26b1,Cyrib,Dicer1,Dlg1,Dlg5,Drosha,Dusp10,Dusp22,Efnb1,Efnb2,Egr3,Elf4,F2rl1,Fadd,Fgl1,Foxj1,Foxn1,Foxp1,Foxp3,Fyn,Fzd5,Gata3,Gimap1,Gima…
GO:0010631	epithelial cell migration	1.46497	473	322.873	1.61e-13	1.57416	147	93.3829	5.46e-08	Acvrl1,Adam17,Adamts9,Ager,Akt3,Amot,Amotl1,Angpt1,Apc,Aqp1,Arf6,Arhgap5,Arsb,Bcas3,Bmp4,Bmper,Bmpr2,Capn7,Ccbe1,Ccn3,Cdh5,Clasp1,Clec14a,Cxcl12,Cxcl13,Cxcr4,Cyp1b1,Daam2,Dab2ip,Dcn,Dicer1,Dock5,Dusp10,Edn2,Efnb2,Egr3,Enpp2,Epb41l5,Epha2,Ets1,Fat2,Fbxw7,Fermt1,Fgf1,Fgf18,Fgfbp1,Fgfr1,Foxp1,Fstl1,Gab2,Gata3,Gipc1,Glul,Gpi1,Gpld1,Grem1,Hdac7,Hdac9,Hif1a,Igf1,Igf2,Insl3,Iqsec1,Irs1,Itga2,Itgav,Itgb1…
GO:0001817	regulation of cytokine production	1.40471	577	410.761	1.83e-13	1.17305	231	196.922	0.0358	Abcc8,Abl2,Adam17,Adam33,Adra2a,Afap1l2,Ager,Akap12,Akirin2,Alox5,Angpt1,Apod,App,Aqp4,Arfgef2,Arg1,Arhgef2,Atf2,Atg5,Atp2b1,Atp6ap2,Bank1,Bcl10,C1qtnf3,C3ar1,Cadm1,Card11,Ccbe1,Ccdc88b,Ccl5,Ccm2l,Ccr5,Ccr7,Cd2,Cd200r2,Cd226,Cd27,Cd274,Cd34,Cd40lg,Cd46,Cd74,Cd81,Cd83,Cd84,Clec9a,Creb1,Crebbp,Crp,Csf1r,Cyp1b1,Cyrib,Ddx1,Ddx3x,Ddx58,Dennd1b,Dhx36,Dicer1,Eif2ak3,Elf1,Epha2,Erbin,Errfi1,F11r,F2,F2r,F…
GO:0045597	positive regulation of cell differentiation	1.26428	1072	847.913	2.11e-13	1.32874	361	271.685	2.8e-08	Aamdc,Abcb10,Abcb1a,Abcb1a,Abi3bp,Actn3,Actr3,Acvr1,Acvr1b,Acvr2a,Acvrl1,Ada,Adamts20,Adamts9,Afdn,Ager,Ahi1,Akap11,Amigo1,Ankrd54,Apc,App,Ar,Arhgef2,Arid1b,Asb4,Aspm,Atxn1,Bcl11a,Bcl2,Bend6,Bin1,Bmp2,Bmp4,Bmpr1b,Bmpr2,Brinp2,Btg1,Car2,Carm1,Cask,Ccl5,Ccn2,Ccr5,Ccr7,Cd101,Cd27,Cd34,Cd4,Cd40lg,Cd46,Cd74,Cd83,Cdh4,Cdh5,Cds1,Cebpa,Cftr,Cntf,Crb2,Creb1,Crebl2,Crk,Csf1,Csf1r,Ctnnb1,Ctnnbip1,Cux1,Cxcl1…
GO:0022408	negative regulation of cell-cell adhesion	1.70155	258	151.627	2.71e-13	1.41414	77	54.4499	0.00888	Abl2,Adora2a,Arg1,Ass1,Bmp2,Bmp4,Casp3,Cblb,Ccm2l,Cd274,Cd37,Cd44,Cd74,Cd86,Cxcl12,Dlg1,Dlg5,Dusp22,Epb41l5,Epcam,Fgl1,Foxj1,Foxp3,Gimap5,Gli3,Gnrh1,Hlx,Ihh,Il1rn,Irf1,Jag1,Jak3,Klf4,Lag3,Lef1,Mad1l1,Map2k5,Mbp,Ndfip1,Nf2,Notch1,Pag1,Pawr,Peli1,Pik3r1,Ppara,Ppm1f,Prkcd,Prnp,Pten,Ptk2,Rc3h1,Rc3h2,Rdx,Rgcc,Ripor2,Runx1,Serpine2,Sh2b3,Smad7,Socs1,Socs5,Socs6,Specc1l,Swap70,Tbx21,Tmem131l,Tnfaip3,Tnf…
GO:0048771	tissue remodeling	1.72555	246	142.563	2.82e-13	1.61497	77	47.6789	0.000118	Abcb1a,Abcb1a,Abi3bp,Abr,Acvrl1,Ager,Ahr,Ahsg,Atg5,Bak1,Bcr,Bmpr2,Car2,Ccr5,Chd7,Cldn18,Crb1,Csf1r,Cspg4,Dbh,Dcstamp,Ddr2,Ednra,Epas1,Epha2,Erg,Ext1,F2r,Fgf8,Gata4,Gja6,Grem1,Gsk3b,Hand2,Hif1a,Igf1,Igfbp5,Inpp4b,Itga4,Itgav,Itgb3,Jag1,Klf6,Lep,Lepr,Lgr4,Lif,Lrp1,Lrp5,Mdm2,Mef2c,Mitf,Mmp9,Nf1,Nfkb1,Nos3,Notch2,Pdk4,Plg,Pparg,Ppargc1b,Ppp3ca,Ptger4,Rassf2,S1pr1,Sfrp1,Spp2,Src,Suco,Syk,Tfrc,Tgfb2,Ti…
GO:0045655	regulation of monocyte differentiation	3.29778	63	19.1037	3.01e-13	3.10148	14	4.51398	0.000141	Apcs,Cd4,Cd74,Cdk6,Csf1,Ctnnbip1,Dcstamp,Fes,Foxp1,Gpr68,Il34,Jun,Myc,Zfp36l1
GO:0001667	ameboidal-type cell migration	1.37944	619	448.732	3.76e-13	1.51691	199	131.188	4.32e-09	Acta2,Actr3,Acvr1,Acvr1b,Acvr1c,Acvrl1,Adam17,Adamts9,Ager,Akap12,Akt3,Amot,Amotl1,Angpt1,Apc,Aqp1,Arf6,Arhgap5,Arid5b,Arsb,Bag4,Bcas3,Bmp4,Bmper,Bmpr2,Capn7,Ccbe1,Ccn3,Cdh2,Cdh5,Cer1,Clasp1,Clec14a,Crb2,Cxcl12,Cxcl13,Cxcr4,Cyp1b1,Daam2,Dab2ip,Dcn,Ddr2,Dicer1,Dock5,Dusp10,Edn2,Ednra,Ednrb,Efnb1,Efnb2,Egr3,Enpp2,Epb41l5,Epha2,Ets1,Fat2,Fbxw7,Fer,Fermt1,Fgf1,Fgf18,Fgf8,Fgfbp1,Fgfr1,Fndc3b,Folr1,Fox…
GO:0050865	regulation of cell activation	1.37643	609	442.449	9.52e-13	1.18514	218	183.945	0.0293	Abl2,Abr,Acta2,Ada,Adora2a,Ager,Ahr,Akirin2,Arg1,Arid1b,Atad5,Bank1,Bcl10,Bcl2,Bcr,Bid,Bmp4,Bst1,Card11,Casp3,Cblb,Ccdc88b,Ccl5,Ccn2,Ccr5,Ccr7,Cd177,Cd209a,Cd226,Cd27,Cd274,Cd37,Cd4,Cd40lg,Cd44,Cd46,Cd74,Cd81,Cd83,Cd84,Cd86,Cdkn1a,Cebpa,Cftr,Cst7,Ctnnb1,Ctsc,Cyp26b1,Cyrib,Ddr2,Dicer1,Dlg1,Dlg5,Drosha,Dusp10,Dusp22,Efnb1,Efnb2,Egr3,F11r,F2rl1,Fadd,Fcgr3,Fcgr3,Fer,Fes,Fgfr1,Fgl1,Fgr,Flt3l,Foxj1,Fox…
GO:0022407	regulation of cell-cell adhesion	1.40935	538	381.736	9.52e-13	1.31854	170	128.931	0.000954	Abl2,Ada,Adora2a,Afdn,Ager,Alox5,Ank3,Arg1,Arid1b,Ass1,Bcl10,Bmp2,Bmp4,Card11,Casp3,Cblb,Ccdc88b,Ccl5,Ccm2l,Ccr5,Ccr7,Cd27,Cd274,Cd37,Cd4,Cd40lg,Cd44,Cd46,Cd74,Cd81,Cd83,Cd86,Celsr2,Chst2,Cited2,Cxcl12,Cxcl13,Cyrib,Dlg1,Dlg5,Dusp10,Dusp22,Efna5,Efnb1,Efnb2,Egr3,Epb41l5,Epcam,Ephb3,Ets1,F11r,Fadd,Fgl1,Foxj1,Foxp3,Gata3,Gcnt2,Gimap5,Gli3,Gnrh1,H2-Ab1,H2-Ob,Hlx,Icos,Igf1,Igf2,Igfbp2,Ihh,Il12a,Il12b,…
GO:0008610	lipid biosynthetic process	1.39246	567	407.193	1.4e-12	1.21896	217	178.02	0.00945	9130409I23Rik,A3galt2,A4galt,Abca3,Abcg1,Abcg4,Abhd2,Abhd5,Acadl,Acer2,Acsl4,Acsm1,Agk,Agps,Aldh1a1,Aldh8a1,Alox12e,Alox5,Amacr,Asah1,Asah2,Asxl3,Atg14,Atg7,Atp1a1,Avpr1a,B3galt1,B3gnt5,B4galt3,B4galt5,Bmp2,Bmp5,Bmpr1b,Cbr4,Cd74,Cds1,Cds2,Cept1,Cerkl,Cers6,Ces1e,Ces1g,Ces1g,Cftr,Cish,Creb1,Crebl2,Crls1,Crppa,Cwh43,Cyb5r2,Cyp11a1,Cyp21a1,Cyp2r1,Cyp39a1,Cyp7b1,Dab2,Dab2,Daglb,Dgkb,Dgkg,Dgkh,Dgki,Dg…
GO:2000489	regulation of hepatic stellate cell activation	6.20434	30	4.83532	1.91e-12	2.65841	9	3.38548	0.0209	Acta2,Ddr2,Fgfr1,Gclc,Lep,Nr1d1,Pdgfrb,Rps6ka1,Smo
GO:0072537	fibroblast activation	4.12784	44	10.6593	2.85e-12	2.16611	11	5.07823	0.0491	Acta2,Ddr2,Fgfr1,Gclc,Gsk3b,Lep,Nr1d1,Pdgfrb,Rgcc,Rps6ka1,Smo
GO:0032956	regulation of actin cytoskeleton organization	1.5008	381	253.865	3.82e-12	1.43204	141	98.4612	6.8e-05	Abi2,Actr3,Akap13,Ap1ar,Arap1,Arf6,Arhgap18,Arhgap35,Arhgef10l,Arhgef5,Arpc5,Bag4,Baiap2l1,Baiap2l2,Bbs4,Bcas3,Bin1,Bst1,Capza2,Ccn2,Cdc42ep2,Cdc42ep3,Clasp1,Coro2b,Crk,Csf1r,Cttn,Cyfip1,Cyria,Cyrib,Daam2,Dbn1,Dixdc1,Dlg1,Dstn,Ect2,Efna5,Epha1,Epha3,Eps8,F11r,F2rl1,Fchsd2,Fer,Fermt2,Fes,Fgr,Fhod3,Fmn1,Fscn1,Hax1,Ilk,Iqgap2,Itgb3,Jam3,Kank1,Kirrel,Lmod3,Lrp1,Map3k1,Mef2c,Met,Mtor,Mtpn,Mtss1,Mylk3,…
GO:2000491	positive regulation of hepatic stellate cell activation	6.96693	26	3.73192	6.7e-12	2.75687	7	2.53911	0.0434	Acta2,Ddr2,Fgfr1,Lep,Pdgfrb,Rps6ka1,Smo
GO:0033002	muscle cell proliferation	1.48727	388	260.88	6.96e-12	1.51909	111	73.07	4.04e-05	Ace2,Adamts1,Ager,Angpt1,Apc,Apln,Apod,Bmp2,Bmp4,Bmpr2,C3ar1,Calcrl,Camk2d,Ccl5,Ccn3,Ccnb1,Cdk1,Cdk1,Cdkn1a,Cited2,Cnn1,Ctnnb1,Ctnnbip1,Cxadr,Dbh,Ddr2,Ednra,Efemp2,Ephb1,Ern1,Esr1,Fgf1,Fgf20,Fgf9,Fgfr1,Fgfr2,Flt1,Foxj2,Foxp1,Frs2,Gata4,Gata6,Gja6,Gli1,Gna12,Gnai2,Gnai3,Gsk3b,Hey2,Hgf,Hif1a,Hpgd,Id2,Igf1,Igf1r,Igfbp5,Il12a,Il12b,Il15,Ilk,Itga2,Itgb3,Jarid2,Jun,Klf4,Mapk1,Mdm2,Mef2c,Mef2d,Megf10,Me…
GO:0051493	regulation of cytoskeleton organization	1.4019	516	368.072	7.14e-12	1.30304	193	148.115	0.000662	Abi2,Actr3,Akap13,Ap1ar,Apc,Arap1,Arf6,Arhgap18,Arhgap35,Arhgef10l,Arhgef2,Arhgef5,Arpc5,Atxn7,Bag4,Baiap2l1,Baiap2l2,Bbs4,Bcas3,Bicd2,Bin1,Bst1,Camsap1,Capza2,Ccn2,Ccsap,Cdc42ep2,Cdc42ep3,Cdh5,Cep295,Cep70,Chmp4b,Clasp1,Clip3,Coro2b,Crk,Csf1r,Cttn,Cyfip1,Cyria,Cyrib,Daam2,Dbn1,Diaph1,Dixdc1,Dlg1,Dst,Dstn,Dync1h1,Dynlt1b,Ect2,Efna5,Epha1,Epha3,Eps8,F11r,F2rl1,Fchsd2,Fer,Fermt2,Fes,Fgr,Fhod3,Fmn1,…
GO:0030334	regulation of cell migration	1.24512	1061	852.129	1.03e-11	1.39523	383	274.506	4.58e-11	Abcc1,Abcc8,Abhd2,Abl2,Abr,Ackr3,Acta2,Actr3,Acvr1,Acvr1b,Acvr1c,Acvrl1,Ada,Adam17,Adamts1,Adamts9,Adra2a,Afdn,Ager,Akap12,Akt3,Aldoa,Amot,Amotl1,Angpt1,Angptl3,Apc,Apod,App,Aqp1,Arap3,Arf6,Arhgap5,Arhgef2,Arsb,Bag4,Bcas3,Bcl2,Bcr,Bmp2,Bmp4,Bmper,Bmpr2,Brms1l,Bst1,C3ar1,Camk2a,Camk2d,Capn7,Cbll1,Ccbe1,Ccl5,Ccn3,Ccr5,Ccr7,Cd200r2,Cd274,Cd74,Cd81,Cdh5,Chrd,Chst2,Cited2,Clasp1,Cldn19,Cldn4,Col3a1,Cp…
GO:1903037	regulation of leukocyte cell-cell adhesion	1.47063	386	262.472	3.05e-11	1.25041	121	96.7684	0.0382	Abl2,Ada,Adora2a,Ager,Alox5,Arg1,Arid1b,Ass1,Bcl10,Bmp4,Card11,Casp3,Cblb,Ccdc88b,Ccl5,Ccr5,Ccr7,Cd27,Cd274,Cd37,Cd4,Cd40lg,Cd44,Cd46,Cd74,Cd81,Cd83,Cd86,Chst2,Cxcl12,Cyrib,Dlg1,Dlg5,Dusp10,Dusp22,Efnb1,Efnb2,Egr3,Ets1,Fadd,Fgl1,Foxj1,Foxp3,Gata3,Gimap5,Gli3,Gnrh1,H2-Ab1,H2-Ob,Hlx,Icos,Igf1,Igf2,Igfbp2,Ihh,Il12a,Il12b,Il15,Il2rg,Il6st,Irf1,Itga4,Jak3,Kitl,Klf4,Lag3,Lef1,Lep,Lgals8,Mad1l1,Nck2,Ndf…
GO:0010632	regulation of epithelial cell migration	1.47015	384	261.198	3.35e-11	1.53642	114	74.1985	1.6e-05	Acvrl1,Adam17,Adamts9,Ager,Akt3,Amot,Amotl1,Angpt1,Apc,Aqp1,Arf6,Arhgap5,Arsb,Bcas3,Bmp4,Bmper,Bmpr2,Capn7,Ccbe1,Clasp1,Cxcl13,Dab2ip,Dcn,Dicer1,Dock5,Dusp10,Enpp2,Epb41l5,Epha2,Ets1,Fbxw7,Fgf1,Fgf18,Fgfbp1,Fgfr1,Foxp1,Gab2,Gata3,Glul,Gpi1,Gpld1,Hdac7,Hdac9,Hif1a,Igf1,Igf2,Insl3,Iqsec1,Irs1,Itga2,Itgb3,Jcad,Jun,Kdr,Klf4,Macf1,Macir,Map2k3,Map2k5,Map3k3,Mapre2,Mcc,Mef2c,Meox2,Met,Mmp9,Mtor,Nf1,Nfe…
GO:0006984	ER-nucleus signaling pathway	2.68507	72	26.8149	3.82e-11	1.73289	22	12.6956	0.0408	Abca7,Agr2,Arhgef10l,Atf6,Atg10,Atp2a2,Bcl2l11,Bid,Eif2ak3,Eif2s1,Erlin1,Erlin2,Gsk3b,Ins2,Nck2,Nfe2l2,Ppp1r15b,Ptpn1,Qrich1,Spring1,Srebf1,Srebf2
GO:0032967	positive regulation of collagen biosynthetic process	2.95437	61	20.6474	4.73e-11	1.89042	16	8.46371	0.0457	Bmp4,Cbx8,Ccn2,Creb3l1,Ddr2,Dicer1,F2,F2r,Ihh,Itga2,Ltbp1,Pdgfrb,Rgcc,Serpinb7,Suco,Tgfb3
GO:0045639	positive regulation of myeloid cell differentiation	1.86914	156	83.4606	7.27e-11	1.57893	49	31.0336	0.00621	Abcb10,Acvr1b,Acvr2a,Ankrd54,Car2,Ccl5,Cd101,Cd4,Cd74,Creb1,Csf1,Csf1r,Ctnnbip1,Dcstamp,Ets1,Evi2,Fadd,Fes,Fos,Gpr68,Gsk3b,Hax1,Hif1a,Id2,Il12b,Il34,Inhba,Itgb3,Jag1,Jun,Kdm1a,Kitl,Lef1,Lep,Lif,Med1,Mturn,Notch2,Pou4f2,Ppargc1b,Ppp3ca,Ripk1,Ror2,Runx1,Slc9b2,Smap1,Tmem64,Trib1,Zfp36l1
GO:0002761	regulation of myeloid leukocyte differentiation	1.73056	195	112.68	9.74e-11	1.47033	56	38.0867	0.0144	Apc,Apcs,Car2,Ccl5,Cd101,Cd4,Cd74,Cdk6,Cldn18,Creb1,Csf1,Csf1r,Ctnnb1,Ctnnbip1,Dcstamp,Evi2,Fadd,Fbxw7,Fes,Fos,Foxp1,Gpr68,Gsk3b,Hax1,Id2,Il12b,Il34,Inpp4b,Itgb3,Jun,Kitl,Lef1,Lif,Mitf,Mtor,Myc,Ndfip1,Nf1,Notch2,Pias3,Pik3r1,Pou4f2,Ppargc1b,Ppp3ca,Rassf2,Ripk1,Ror2,Runx1,Sfrp1,Slc9b2,Thoc5,Tmem178,Tmem64,Trib1,Ubash3b,Zfp36l1
GO:0001782	B cell homeostasis	2.57621	75	29.1125	9.75e-11	1.82017	19	10.4386	0.0392	Ahr,Bak1,Bcl2,Bcl2l11,Casp3,Dock10,Dock11,Foxp3,Hif1a,Ikbkb,Mef2c,Rc3h1,Rc3h2,Sash3,Sh2b2,Sos1,Spns2,Tnfaip3,Traf3ip2
GO:0030217	T cell differentiation	1.49645	336	224.532	1.23e-10	1.30389	103	78.9946	0.0209	Abl2,Ada,Adam17,Apc,Arid1b,Atf2,Bcl11a,Bcl2,Bmp4,Card11,Ccr5,Ccr7,Cd27,Cd4,Cd44,Cd46,Cd74,Cd83,Cdk6,Chd7,Cracr2a,Ctnnb1,Cyp26b1,Dicer1,Drosha,Dusp10,Egr3,Fadd,Foxj1,Foxn1,Foxp1,Foxp3,Fzd5,Gata3,Gimap1,Gimap5,Gli3,Gm9774,Gpr89,Hlx,Ihh,Il12a,Il12b,Il15,Il2rg,Irf1,Jag2,Jak3,Kdelr1,Kit,Lag3,Lef1,Lep,Lepr,Mr1,Nfkbiz,Nhej1,Nkx2-3,Pik3r6,Prdm1,Prex1,Prr7,Ptger4,Rabl3,Rasgrp1,Rc3h1,Rc3h2,Rhoh,Ripk2,Rorc,…
GO:0031032	actomyosin structure organization	1.60941	246	152.851	1.79e-10	1.33563	78	58.3996	0.0325	Actc1,Akap13,Arap1,Arhgef10l,Arhgef5,Bag4,Bbs4,Ccn2,Cdc42bpa,Cit,Clasp1,Cnn1,Cnn3,Coro2b,Cul3,Ect2,Epb41,Epb41l2,Epb41l4a,Epb41l5,Epha1,F11r,Fam171a1,Fermt2,Fhdc1,Fhod3,Frmd3,Frmd5,Frmd6,Itgb1,Krt8,Krt8,Lmod3,Mef2a,Mef2c,Met,Mtor,Myh9,Mylk3,Myo18a,Myom2,Myoz2,Neb,Nf2,Nrp1,Pdgfrb,Pdlim1,Pfn1,Pfn2,Phactr1,Pik3r1,Ppm1f,Prkcq,Prox1,Ptger4,Pxn,Rac1,Rgcc,Rhpn2,Rtkn,S1pr1,Sh3pxd2b,Sorbs1,Sorbs3,Spag6,Sr…
GO:0007162	negative regulation of cell adhesion	1.46587	364	248.316	1.99e-10	1.45952	119	81.5337	0.000134	Abl2,Acer2,Acvrl1,Adora2a,Ager,Angpt1,Ap1ar,Apod,Arg1,Ass1,Bcas3,Bmp2,Bmp4,Cask,Casp3,Cblb,Cbll1,Ccm2l,Cd274,Cd37,Cd44,Cd74,Cd86,Coro2b,Cxcl12,Cyp1b1,Dab1,Dlg1,Dlg5,Dscaml1,Dusp1,Dusp22,Efna5,Enpp2,Epb41l5,Epcam,Epha4,Erbb3,Fbln1,Fgl1,Foxj1,Foxp3,Fzd4,Gcnt2,Gimap5,Gli3,Gnrh1,Hlx,Ihh,Il1rn,Irf1,Jag1,Jak3,Jam2,Jam3,Kank1,Klf4,Lag3,Lamb1,Lef1,Lrp1,Mad1l1,Map2k5,Mbp,Myo1f,Nat8f2,Nat8f7,Ndfip1,Nf1,Nf2…
GO:0048872	homeostasis of number of cells	1.62622	235	144.507	1.99e-10	1.42142	79	55.5784	0.00672	Afdn,Ahr,Akt3,Arhgef5,Bak1,Bcl2,Bcl2l11,Bcr,Card11,Casp3,Ccn3,Ccnb2,Ccr5,Ccr7,Cdh2,Col14a1,Crispld1,Csf1,Dock10,Dock11,Emcn,Ext1,Ezh1,F2r,Fadd,Fancc,Flt3l,Foxn1,Foxp3,Fstl1,Gata3,Gimap5,Gpi1,Gpr174,Hif1a,Ift88,Ikbkb,Jak3,Jam3,Kras,Lgr4,Lrrc19,Mecom,Mef2c,Mthfd1,Myct1,Napepld,Nbea,Nkx2-3,Nos3,Notch1,P2ry14,Pde4b,Pla2g10,Pmaip1,Rac1,Rassf2,Rc3h1,Rc3h2,Rpa1,Rps24,Sash3,Sh2b2,Sh2b3,Sit1,Slc40a1,Smarc…
GO:0061572	actin filament bundle organization	1.69217	205	121.146	1.99e-10	1.42194	69	48.5253	0.0123	Abl2,Actn1,Arap1,Arhgef10l,Arhgef5,Bag4,Baiap2l1,Baiap2l2,Bbs4,Ccn2,Clasp1,Coro2b,Cul3,Dbn1,Dpysl3,Epha1,Eps8,F11r,Fam171a1,Fermt2,Fhdc1,Fscn1,Lcp1,Map3k1,Met,Mtor,Mtss1,Myo1b,Nf2,Nrp1,Pawr,Pcdh15,Pdlim1,Pfn1,Pfn2,Pfn3,Phactr1,Pik3r1,Plek,Pls3,Ppm1f,Prkcq,Prkn,Ptger4,Pxn,Rac1,Rdx,Rgcc,Rhod,Rhpn2,S1pr1,Sh3pxd2b,Shtn1,Sorbs1,Sorbs3,Spag6,Src,Stmn1,Swap70,Synpo2,Tacr1,Tgfb3,Tgfbr1,Tjp1,Tmeff2,Tpm1,T…
GO:0032965	regulation of collagen biosynthetic process	2.59168	72	27.7812	2.23e-10	1.73289	22	12.6956	0.0408	Ager,Bmp4,Cbx8,Ccn2,Creb3l1,Ddr2,Dicer1,Errfi1,F2,F2r,Got1,Ihh,Itga2,Ltbp1,Nppc,Nr1h4,Pdgfrb,Pparg,Rgcc,Serpinb7,Suco,Tgfb3
GO:0043542	endothelial cell migration	1.47159	352	239.198	2.54e-10	1.47325	101	68.556	0.000409	Acvrl1,Adam17,Adamts9,Ager,Akt3,Amot,Amotl1,Angpt1,Bcas3,Bmp4,Bmper,Bmpr2,Ccbe1,Ccn3,Cdh5,Clec14a,Cxcl12,Cxcl13,Cxcr4,Cyp1b1,Dab2ip,Dcn,Dicer1,Edn2,Efnb2,Egr3,Epha2,Ets1,Fbxw7,Fgf1,Fgf18,Fgfbp1,Fgfr1,Foxp1,Fstl1,Gata3,Gipc1,Glul,Gpi1,Gpld1,Grem1,Hdac7,Hdac9,Hif1a,Igf1,Igf2,Itgav,Itgb1,Itgb3,Jcad,Kdr,Klf4,Lemd3,Lgals8,Loxl2,Map2k3,Map2k5,Map3k3,Mef2c,Meox2,Met,Myh9,Nf1,Nfe2l2,Nos3,Notch1,Nr2f2,Nr4…
GO:0051017	actin filament bundle assembly	1.68838	202	119.641	3.68e-10	1.42621	68	47.6789	0.0122	Abl2,Actn1,Arap1,Arhgef10l,Arhgef5,Bag4,Baiap2l1,Baiap2l2,Bbs4,Ccn2,Clasp1,Coro2b,Cul3,Dbn1,Dpysl3,Epha1,Eps8,F11r,Fam171a1,Fermt2,Fhdc1,Fscn1,Lcp1,Map3k1,Met,Mtor,Mtss1,Myo1b,Nf2,Nrp1,Pawr,Pcdh15,Pdlim1,Pfn1,Pfn2,Pfn3,Phactr1,Pik3r1,Plek,Pls3,Ppm1f,Prkcq,Prkn,Ptger4,Pxn,Rac1,Rdx,Rgcc,Rhod,Rhpn2,S1pr1,Sh3pxd2b,Sorbs1,Sorbs3,Spag6,Src,Stmn1,Swap70,Synpo2,Tacr1,Tgfb3,Tgfbr1,Tjp1,Tmeff2,Tpm1,Triobp,…
GO:0048041	focal adhesion assembly	1.99113	122	61.2716	4.49e-10	1.62968	40	24.5448	0.00925	Actn1,Actn3,Acvrl1,Apod,Bcas3,Bcl2,Bcr,Clasp1,Coro2b,Cttn,Dusp22,Efna5,Enpp2,Epb41l5,Epha3,Fermt2,Fmn1,Grem1,Itga2,Itgav,Kdr,Lims1,Lrp1,Macf1,Nrp1,Pdpk1,Ppm1f,Pten,Ptk2,Ptprk,Pxn,Rac1,Rhod,Slk,Sorbs1,Src,Taok2,Tek,Vegfa,Whamm
GO:0046885	regulation of hormone biosynthetic process	2.35067	82	34.8837	5.87e-10	1.89042	16	8.46371	0.0457	Atp1a1,Bmp2,Bmp5,Dab2,Dab2,Dkk3,Gfi1,Hif1a,Igf1,Igf1r,Igf2,Nfkb1,Nr3c1,Pde8b,Por,Ppargc1a
GO:0000165	MAPK cascade	1.26124	829	657.291	6.41e-10	1.38279	300	216.953	1.07e-08	Abca7,Abl2,Ace2,Ackr3,Acta2,Adam17,Adra1a,Adra1d,Adra2a,Ager,Akap12,Akap13,Angpt1,Ankrd6,Apc,Apip,App,Ar,Arhgef5,Ash1l,Atf2,Atp6ap2,Atp6v0c,Bank1,Bcar3,Bmp2,Bmp4,Bmp8b,Bmper,C1qtnf3,Calcr,Camk2d,Casr,Ccl5,Ccn2,Ccnq,Ccr5,Ccr7,Cd27,Cd4,Cd44,Cd74,Cd81,Cd84,Cdh2,Cdk5rap3,Chrna10,Chrna9,Cnksr3,Cntf,Cntnap2,Cops5,Cracr2a,Crk,Csf1r,Cspg4,Ctnnb1,Cxcl12,Cxcr4,Dab2,Dab2,Dab2ip,Dact1,Dag1,Dcc,Ddr2,Denn2b,Di…
GO:0035162	embryonic hemopoiesis	2.44561	75	30.6672	7.98e-10	2.18126	16	7.33522	0.0107	Ahr,Flt3l,Gata3,Hif1a,Kat6a,Kdr,Kit,Kitl,Med1,Pbx1,Runx1,Sh2b3,Stk3,Tgfbr2,Thoc5,Tnrc6c
GO:0002683	negative regulation of immune system process	1.41375	408	288.594	8.01e-10	1.21817	144	118.21	0.0448	A2m,Abr,Ada,Adora2a,Ahr,Angpt1,Apcs,Apod,Arg1,Atg5,Bank1,Bcr,Bmp4,Casp3,Cblb,Ccn3,Ccr5,Cd200r2,Cd274,Cd37,Cd44,Cd46,Cd74,Cd84,Cd86,Cdk6,Cebpa,Cldn18,Cnot7,Col3a1,Crk,Cst7,Ctnnb1,Cxcl12,Dgkz,Dlg1,Dlg5,Dusp1,Dusp10,Dusp22,Elf1,Fadd,Fbxw7,Fcgr3,Fcgr3,Fer,Fgl1,Fgr,Foxj1,Foxp3,Gal,Gimap5,Gli3,Gnrh1,Gpr68,Gpx2,Grem1,H2-Ob,Hlx,Hspa9,Id2,Ifi203,Igf1,Igf2,Ihh,Il12b,Il13ra2,Il33,Inpp4b,Irf1,Jak3,Kitl,Klre1…
GO:0060420	regulation of heart growth	1.69767	182	107.206	1.99e-09	1.57535	40	25.3911	0.0159	Ahr,Apc,Ccnb1,Cdk1,Cdk1,Cited2,Col14a1,Ctdp1,Cxadr,Dusp6,Fgf20,Fgf9,Fgfr1,Fgfr2,Foxp1,Gata4,Gata6,Gja6,Gli1,Hey2,Igf1,Jarid2,Mapk1,Mef2c,Meis1,Mtor,Ncam1,Notch1,Nr3c1,Pi16,Ppara,Prox1,Pten,Rgs2,Sav1,Tbx2,Tgfbr1,Tgfbr2,Vgll4,Zfpm2
GO:0032970	regulation of actin filament-based process	1.39441	415	297.617	2.78e-09	1.41782	156	110.028	4.04e-05	Abi2,Acta2,Actr3,Akap13,Ank2,Ap1ar,Arap1,Arf6,Arhgap18,Arhgap35,Arhgef10l,Arhgef5,Arpc5,Atp1a1,Bag4,Baiap2l1,Baiap2l2,Bbs4,Bcas3,Bin1,Bst1,Cacna1c,Capza2,Ccn2,Cdc42ep2,Cdc42ep3,Clasp1,Coro2b,Crk,Csf1r,Ctnna3,Cttn,Cyfip1,Cyria,Cyrib,Daam2,Dbn1,Dixdc1,Dlg1,Dsc2,Dstn,Ect2,Efna5,Epha1,Epha3,Eps8,F11r,F2rl1,Fchsd2,Fer,Fermt2,Fes,Fgr,Fhod3,Fmn1,Frmd6,Fscn1,Gata4,Hax1,Ilk,Iqgap2,Itgb3,Jam3,Kank1,Kcnj2,K…
GO:0035733	hepatic stellate cell activation	4.16637	32	7.68055	3.34e-09	2.53182	10	3.94973	0.0205	Acta2,Ddr2,Fgfr1,Gclc,Gsk3b,Lep,Nr1d1,Pdgfrb,Rps6ka1,Smo
GO:1902107	positive regulation of leukocyte differentiation	1.55321	247	159.025	3.44e-09	1.3755	78	56.7069	0.0159	Ada,Ager,Arid1b,Car2,Ccl5,Ccr5,Ccr7,Cd101,Cd27,Cd4,Cd40lg,Cd46,Cd74,Cd83,Creb1,Csf1,Csf1r,Ctnnbip1,Dcstamp,Dusp10,Egr3,Evi2,Fadd,Fes,Flt3l,Fos,Foxp3,Gata3,Gimap5,Gli3,Gpr68,Gsk3b,Hax1,Hlx,Id2,Ihh,Il12a,Il12b,Il15,Il15ra,Il2rg,Il34,Irf1,Itgb3,Jun,Kitl,Lef1,Lif,Nfkbiz,Notch2,Pik3r6,Pou4f2,Ppargc1b,Ppp3ca,Prdm1,Rasgrp1,Rhoh,Ripk1,Ripk2,Ror2,Runx1,Sash3,Shb,Slc9b2,Smarca2,Socs1,Socs5,Sox13,Syk,Tespa1…
GO:0051336	regulation of hydrolase activity	1.25406	784	625.168	5.9e-09	1.29111	322	249.397	6e-06	A2m,Abhd5,Abl2,Abr,Acer2,Acrbp,Acvr1c,Adap1,Adcyap1r1,Adora2a,Adra1a,Afdn,Ager,Ahr,Ahsg,Akirin2,Amot,Angptl3,Antxr1,Anxa8,Apaf1,Apcs,Aph1b,App,Aqp1,Arap1,Arap2,Arap3,Arhgap15,Arhgap22,Arhgap24,Arhgap35,Arhgap9,Arhgef26,Arhgef5,Arl6ip1,Asap1,Atp13a2,Atp2a3,Bag4,Bak1,Bbs4,Bcar3,Bcas3,Bcl10,Bcl2l11,Bcr,Bid,Bin1,Bmp2,Bod1,Bves,Calm1,Calm2,Camk2a,Cast,Cblb,Ccl5,Ccn2,Ccr7,Cd44,Cd86,Cdk5rap3,Chn1,Chn1,C…
GO:0046620	regulation of organ growth	1.58743	221	139.219	6.72e-09	1.52328	52	34.137	0.00973	Ahr,Apc,Bcl2l11,Cacna1c,Ccnb1,Cdk1,Cdk1,Cited2,Col14a1,Ctdp1,Cxadr,Dusp6,Fgf20,Fgf8,Fgf9,Fgfr1,Fgfr2,Foxp1,Gata4,Gata6,Gja6,Gli1,Gm49361,Hey2,Hlx,Igf1,Igf2,Jarid2,Mapk1,Mef2c,Meis1,Mtor,Ncam1,Notch1,Nr3c1,Pi16,Ppara,Prox1,Pten,Ptk2,Rgs2,Sash3,Sav1,Smo,Stk3,Tbx2,Tgfbr1,Tgfbr2,Vgll4,Wwc1,Wwc2,Zfpm2
GO:0030335	positive regulation of cell migration	1.28855	638	495.132	8.12e-09	1.47639	242	163.914	1.93e-09	Abcc1,Abl2,Ackr3,Acta2,Actr3,Acvr1,Acvr1b,Adam17,Adamts1,Adra2a,Ager,Akap12,Akt3,Aldoa,Amot,Amotl1,Angpt1,Angptl3,Apc,App,Aqp1,Arf6,Arhgap5,Arhgef2,Bag4,Bcas3,Bcl2,Bmp2,Bmp4,Bmpr2,C3ar1,Camk2d,Capn7,Cbll1,Ccbe1,Ccl5,Ccr5,Ccr7,Cd274,Cd74,Cdh5,Clasp1,Cldn4,Cpne3,Creb3,Crk,Csf1,Csf1r,Cxcl12,Cxcl13,Cxcr4,Cyp1b1,Dab2,Dab2,Dab2ip,Ddr2,Diaph1,Dicer1,Dnm1l,Dock4,Dock5,Edn2,Ednra,Egfr,Elp3,Enpp2,Epb41l5,E…
GO:0051345	positive regulation of hydrolase activity	1.32491	514	387.951	1.49e-08	1.29593	185	142.755	0.00126	Abhd5,Abl2,Abr,Acer2,Acrbp,Acvr1c,Adcyap1r1,Adra1a,Afdn,Ager,Akirin2,Antxr1,Apaf1,Aph1b,App,Arap1,Arap2,Arap3,Arhgap22,Arhgap24,Arhgap35,Arhgef26,Arhgef5,Asap1,Atp2a3,Bak1,Bcar3,Bcas3,Bcl10,Bcl2l11,Bcr,Bid,Bin1,Bmp2,Calm1,Calm2,Ccl5,Ccn2,Ccr7,Cd86,Chn1,Chn1,Chn2,Cldn4,Creb3,Crk,Cxcl13,Cycs,Dap,Dapk1,Ddx3x,Dennd1a,Dennd1b,Dock10,Dock11,Dock6,Dvl3,Ect2,Eif2ak3,Epha1,Epha2,Epha4,Esr1,Evi5,Evi5l,F11r…
GO:0032101	regulation of response to external stimulus	1.2436	795	639.274	1.78e-08	1.22681	316	257.579	0.000602	A2m,Abcc1,Abcc8,Abr,Ada,Adam17,Adamts12,Adora2a,Ager,Ahsg,Aipl1,Akirin2,Aldh2,Alox5,Ankrd17,Anxa2,Aoah,Aph1b,App,Arel1,Arg1,Ash1l,Atg5,Bace1,Bbs4,Bcr,Bmpr2,Bst1,C1qtnf3,C3ar1,Cacnb3,Cadm1,Calcrl,Cask,Casr,Ccl5,Ccn3,Ccr5,Ccr7,Cd180,Cd200r2,Cd226,Cd34,Cd37,Cd44,Cd74,Cd81,Cd84,Cdh5,Cebpa,Clasp1,Cldn19,Cnot7,Cntf,Coch,Cpb2,Creb3,Crk,Csf1,Csf1r,Cst7,Ctsc,Cttn,Cxcl12,Cxcl13,Cxcr4,Cyrib,Daglb,Dbn1,Ddx58…
GO:0008286	insulin receptor signaling pathway	1.73159	150	86.6258	2.81e-08	1.42973	48	33.5727	0.0432	Ahsg,Apc,Baiap2l1,Bcar3,Fer,Foxo4,Gnai2,Gpld1,Grb14,Gsk3b,Igf1r,Igf2,Inppl1,Ins2,Irs1,Kank1,Lep,Mzb1,Ndel1,Nr1h4,Nucks1,Osbpl8,Pdk2,Pdk4,Phip,Pid1,Pik3r1,Pik3r3,Pip4k2a,Plcb1,Prkcd,Prkcq,Ptpn1,Sesn3,Sh2b2,Sik2,Slc27a4,Slc2a8,Slc39a14,Socs1,Socs3,Socs7,Sorbs1,Sorl1,Src,Srebf1,Tns2,Ybx1
GO:2000147	positive regulation of cell motility	1.27428	641	503.03	3.03e-08	1.45085	246	169.556	4.32e-09	Abcc1,Abl2,Ackr3,Acta2,Actr3,Acvr1,Acvr1b,Adam17,Adamts1,Adra2a,Ager,Akap12,Akt3,Aldoa,Amot,Amotl1,Angpt1,Angptl3,Apc,App,Aqp1,Arf6,Arhgap5,Arhgef2,Bag4,Bcas3,Bcl2,Bmp2,Bmp4,Bmpr2,C3ar1,Camk2d,Capn7,Cbll1,Ccbe1,Ccdc25,Ccl5,Ccr5,Ccr7,Cd274,Cd74,Cdh5,Clasp1,Cldn4,Cpne3,Creb3,Crk,Csf1,Csf1r,Cxcl12,Cxcl13,Cxcr4,Cyp1b1,Dab2,Dab2,Dab2ip,Ddr2,Diaph1,Dicer1,Dnm1l,Dock4,Dock5,Duox2,Duoxa2,Edn2,Ednra,Egfr,…
GO:0001974	blood vessel remodeling	1.97976	99	50.0062	3.37e-08	1.74005	27	15.5168	0.0177	Abr,Acvrl1,Ahr,Atg5,Bak1,Bcr,Bmpr2,Ccr5,Chd7,Crb1,Dbh,Ednra,Epas1,Erg,Ext1,Fgf8,Gja6,Igf1,Itga4,Jag1,Lif,Lrp1,Mdm2,Mef2c,Nos3,Tgfb2,Vegfa
GO:0014910	regulation of smooth muscle cell migration	1.65827	172	103.722	3.37e-08	1.69993	47	27.6481	0.00143	Abhd2,Adamts1,Ager,Bcl2,Camk2d,Ccl5,Crk,Cyp1b1,Ddr2,Dock4,Dock5,F3,Fgf9,Foxo4,Gna12,Igf1,Igfbp5,Il6st,Ilk,Itga2,Itgb3,Lrp1,Mdm2,Mef2c,Myc,Myo5a,Nf1,Nfe2l2,Nr4a3,P2ry2,P2ry6,Pdgfa,Pdgfrb,Plxna1,Pparg,Ppargc1a,Ptger4,Ptk2,S100a11,Slit2,Smo,Sorl1,Src,Tacr1,Tlr4,Tpm1,Trib1
GO:0001889	liver development	1.8588	117	62.9437	4.04e-08	1.70497	38	22.2878	0.00512	Ada,Ahr,Arf6,Atf2,Atg7,Cadm1,Ccnd1,Cdk5rap3,Cebpa,Cited2,Ezh1,Gata6,Gli1,Hgf,Hlx,Hmbs,Hnf1a,Hnf1b,Ift88,Igf2r,Itpr1,Jarid2,Jun,Man2a1,Med1,Met,Mrtfb,Nf1,Notch1,Notch2,Onecut2,Ptcd2,Rb1cc1,Runx1,Sp3,Sulf2,Upb1,Upf2
GO:0033688	regulation of osteoblast proliferation	2.30957	68	29.4428	4.27e-08	1.89042	16	8.46371	0.0457	Ahr,Bcl2,Bmp2,Fgfr2,Grem1,Gsk3b,Igf1r,Itgav,Itgb3,Lrp5,Ltf,Mn1,Nf2,Npr3,Sfrp1,Sox8
GO:0040007	growth	1.20027	1018	848.143	4.41e-08	1.30193	364	279.585	3.19e-07	4932438A13Rik,Abl2,Acsl4,Actn3,Actr3,Acvr1b,Acvrl1,Adam17,Adra1a,Afdn,Agr2,Ahi1,Ahr,Ahsg,Akap13,Ankrd11,Apc,App,Ar,Arid5b,Arih2,Armc10,Aspm,Atf5,Atrn,Auts2,Auts2,Avpr1a,Barhl2,Bbs4,Bcl11a,Bcl2,Bcl2l11,Bmp4,Bmpr1b,Bmpr2,Brms1l,Cacna1c,Cadm1,Camk2d,Ccm2l,Ccn3,Ccn5,Ccnb1,Ccnb2,Ccr5,Cd44,Cd81,Cda,Cdh4,Cdk1,Cdk1,Cdkn1a,Cdkn2aip,Cdkn2c,Chd7,Chrna1,Cish,Cited2,Clstn1,Cntf,Cntnap2,Col14a1,Col3a1,Colq,Cre…
GO:0006066	alcohol metabolic process	1.42843	313	219.121	5.04e-08	1.35527	130	95.922	0.00184	Abca1,Abca5,Abcg1,Abcg4,Acadl,Acer2,Aco2,Acpp,Adcyap1r1,Adh1,Adh6a,Aldh1a1,Aldh3a2,Angptl3,Aplp2,Apof,App,Asah1,Asah2,Bmp2,Bmp5,Cat,Cbr4,Cebpa,Ces1e,Ces1g,Ces1g,Cftr,Cyp11a1,Cyp1b1,Cyp2d9,Cyp2r1,Cyp39a1,Cyp46a1,Cyp7b1,Dab2,Dab2,Dbh,Dhcr7,Dhrs3,Disp3,Dkk3,Ednrb,Erlin1,Erlin2,Fdx1,Fech,Fgf1,Fgfr1,Fgl1,Galk1,Gch1,Gde1,Gfi1,Gk5,Got1,Grk3,Hao1,Hdlbp,Hnf1a,Hsd17b7,Hsd3b7,Idh2,Inpp4b,Inpp5a,Inpp5j,Inppl…
GO:1901137	carbohydrate derivative biosynthetic process	1.36965	392	286.205	5.2e-08	1.22878	156	126.956	0.0268	A3galt2,A4galt,Abca7,Acsl4,Ada,Adal,Adcy10,Adcy2,Adcy9,Adsl,Adssl1,Ak1,Aldoa,Alg14,Alg2,Alg6,Alg8,Ampd1,Angpt1,Atp5g3,Atp5j,Atp5o,Atpsckmt,B3galt1,B3gat2,B3gnt2,B3gnt8,B4galt1,B4galt3,B4galt5,Bcl2,Cant1,Ccr7,Cda,Chst1,Chst9,Chsy3,Cmas,Csgalnact1,Ctnnb1,Cwh43,Dctd,Dhodh,Dip2a,Dlat,Dld,Dmac2l,Dse,Eno1,Ext1,Extl3,Fa2h,Fam20b,Fcsk,Fktn,Gal3st1,Gal3st3,Gart,Gfpt1,Gk5,Glce,Gm5426,Gmds,Gmpr,Gmps,Gnpda1,…
GO:0008202	steroid metabolic process	1.43335	306	213.487	5.77e-08	1.30945	116	88.5868	0.0113	Abca1,Abca5,Abcb11,Abcg1,Abcg4,Acadl,Amacr,Angptl3,Aplp2,Apof,App,Asah1,Atp1a1,Atp8b1,Bmp2,Bmp5,Bmpr1b,Cat,Cebpa,Ces1e,Ces1g,Ces1g,Cftr,Cyb5r2,Cyp11a1,Cyp1b1,Cyp21a1,Cyp26a1,Cyp26b1,Cyp26c1,Cyp2b9,Cyp2d9,Cyp2e1,Cyp2r1,Cyp39a1,Cyp46a1,Cyp7b1,Dab2,Dab2,Dhcr7,Dhrs11,Dhrs9,Disp3,Dkk3,Ednrb,Erlin1,Erlin2,Esr1,Fdx1,Fech,Fgf1,Fgfr1,Fgl1,Gal,Gc,Gfi1,Gm12248,Hdlbp,Hnf1a,Hrh1,Hsd17b10,Hsd17b12,Hsd17b3,Hsd1…
GO:0051272	positive regulation of cellular component movement	1.26722	644	508.199	5.84e-08	1.43401	248	172.942	1.02e-08	Abcc1,Abl2,Ackr3,Acta2,Actr3,Acvr1,Acvr1b,Adam17,Adamts1,Adra2a,Ager,Akap12,Akt3,Aldoa,Amot,Amotl1,Angpt1,Angptl3,Apc,App,Aqp1,Arf6,Arhgap5,Arhgef2,Bag4,Bcas3,Bcl2,Bmp2,Bmp4,Bmpr2,Borcs5,C3ar1,Camk2d,Capn7,Cbll1,Ccbe1,Ccdc25,Ccl5,Ccr5,Ccr7,Cd274,Cd74,Cdh5,Clasp1,Cldn4,Cpne3,Creb3,Crk,Csf1,Csf1r,Cxcl12,Cxcl13,Cxcr4,Cyp1b1,Dab2,Dab2,Dab2ip,Ddr2,Diaph1,Dicer1,Dnm1l,Dock4,Dock5,Duox2,Duoxa2,Edn2,Ednr…
GO:1902533	positive regulation of intracellular signal transduction	1.21862	874	717.206	6.79e-08	1.3517	368	272.249	4.03e-09	Abca7,Abl2,Abra,Ackr3,Acta2,Ada,Adam17,Adcyap1r1,Adgrv1,Adgrv1,Adra1a,Adra1d,Adra2a,Ager,Akap12,Akap13,Akt3,Angpt1,Ankrd17,Ankrd6,App,Ar,Arhgef3,Arhgef5,Atp6v0c,Auts2,Auts2,Bag4,Bank1,Bcar3,Bcl10,Bcl2l11,Bclaf1,Bid,Bmp2,Bmp4,Bmper,Bub1,C1qtnf3,Calcr,Camk2d,Camta1,Card11,Casr,Cat,Cbl,Ccl5,Ccn2,Ccnq,Ccr5,Ccr7,Cd27,Cd4,Cd44,Cd74,Cd81,Cd84,Cd86,Cdh2,Cdk5rap3,Cherp,Clec16a,Cntf,Col3a1,Cracr2a,Crebbp,C…
GO:0046578	regulation of Ras protein signal transduction	1.50387	241	160.253	7.56e-08	1.49053	82	55.0141	0.00128	Abca1,Abl2,Abra,Adra1a,Akap13,Arap3,Arf6,Arfgef2,Arfgef3,Arhgap24,Arhgap35,Arhgef2,Arhgef28,Arhgef3,Auts2,Auts2,Bcr,Camk2d,Cbl,Cdc42se2,Cdh2,Col3a1,Crk,Csf1,Cul3,Cyth1,Cyth3,Dab2ip,Dennd1a,Dennd3,Dennd4b,Dgki,Dgkz,Dynlt1b,Eps8,Erbin,F11r,F2r,F2rl1,F2rl2,Fbxo8,Gpr174,Igf1,Iqsec1,Itgb1,Kank1,Kitl,Kras,Mapkap1,Mapre2,Met,Nf1,Notch1,Notch2,Nrp1,P2ry10,Pdgfrb,Pik3cg,Prag1,Psd3,Psd4,Rabl3,Ralgps1,Ralgp…
GO:0071560	cellular response to transforming growth factor beta stimulus	1.49405	246	164.653	7.7e-08	1.3541	68	50.218	0.0384	Actr3,Acvrl1,Adam17,Apaf1,Aspn,Bmp2,Brms1l,Cited2,Crebbp,Crk,Dab2,Dab2,Dbn1,Eid2,Epb41l5,Fermt1,Folr1,Fyn,Gipc1,Glg1,Gm49361,Got1,Hipk2,Htra1,Igf1r,Il17rd,Lemd3,Lrp1,Ltbp1,Mef2c,Nkx2-1,Nos3,Npnt,Nr3c1,Nrep,Onecut2,Ppara,Pparg,Ppargc1a,Ppm1a,Ptk2,Rasl11b,Rbbp7,Runx1,Sap30l,Sdcbp,Slc2a10,Smad2,Smad6,Smad7,Snx1,Sox5,Sox6,Spry1,Spry2,Src,Suds3,Tgfb3,Tgfbr1,Thbs1,Usp9x,Veph1,Wwox,Xcl1,Yes1,Zeb2,Zfp36l…
GO:0043534	blood vessel endothelial cell migration	1.56684	200	127.645	7.95e-08	1.53872	56	36.394	0.00538	Acvrl1,Adam17,Akt3,Amot,Amotl1,Angpt1,Cdh5,Clec14a,Cxcl12,Cxcr4,Cyp1b1,Efnb2,Egr3,Epha2,Ets1,Fbxw7,Fgf18,Fgfbp1,Fgfr1,Gpld1,Grem1,Hdac7,Hdac9,Hif1a,Igf1,Igf2,Itgb1,Jcad,Kdr,Klf4,Lemd3,Map2k3,Map2k5,Map3k3,Mef2c,Meox2,Myh9,Nf1,Nfe2l2,Nos3,Notch1,Nr4a1,Nrp1,Pparg,Prkd1,Prl,Ptgs2,Rgcc,Rhoj,Robo1,Slit2,Tbxa2r,Thbs1,Vash1,Vegfa,Vegfc
GO:0014909	smooth muscle cell migration	1.60581	182	113.339	8.43e-08	1.64338	51	31.0336	0.00197	Abhd2,Adamts1,Ager,Arpc5,Bcl2,Camk2d,Ccl5,Ccn3,Crk,Cyp1b1,Ddr2,Dock4,Dock5,F3,Fgf9,Foxo4,Gna12,Igf1,Igfbp5,Il6st,Ilk,Itga2,Itga4,Itgb3,Lrp1,Mdm2,Mef2c,Myc,Myo5a,Nf1,Nfe2l2,Nr4a3,P2ry2,P2ry6,Pdgfa,Pdgfrb,Plat,Plxna1,Pparg,Ppargc1a,Ptger4,Ptk2,S100a11,Slit2,Smo,Sorl1,Src,Tacr1,Tlr4,Tpm1,Trib1
GO:0046631	alpha-beta T cell activation	1.55222	207	133.357	9.67e-08	1.35655	62	45.704	0.0477	Abl2,Ada,Adora2a,Ager,Atf2,Card11,Cblb,Ccr5,Ccr7,Cd274,Cd44,Cd81,Cd83,Cracr2a,Elf4,Foxp1,Foxp3,Gata3,Gimap1,Gimap5,Gli3,H2-Ab1,Hlx,Ihh,Il12a,Il12b,Il15,Il2rg,Irf1,Jak3,Lef1,Mapk8ip1,Myc,Ndfip1,Nfkbiz,Nkx2-3,Prdm1,Prkcq,Prr7,Ptger4,Rc3h1,Rc3h2,Ripk2,Rorc,Runx1,Sash3,Sema4a,Sh3rf1,Shb,Smad7,Socs1,Socs5,Syk,Tbx21,Tcf7,Tgfbr2,Tnfsf18,Txk,Wdfy4,Xcl1,Zbtb16,Zc3h12a
GO:0033077	T cell differentiation in thymus	1.80127	122	67.7301	9.67e-08	1.62458	33	20.3129	0.0214	Abl2,Ada,Adam17,Apc,Bcl2,Bmp4,Cdk6,Ctnnb1,Egr3,Fadd,Foxj1,Foxn1,Fzd5,Gata3,Gli3,Gm9774,Ihh,Il2rg,Mr1,Prr7,Rabl3,Rasgrp1,Rorc,Rps6,Sos1,Tespa1,Tmem131l,Tox,Vnn1,Xrcc4,Zfp36l1,Zfp36l2,Zfp608
GO:0008285	negative regulation of cell population proliferation	1.23687	755	610.412	9.7e-08	1.24335	248	199.461	0.00153	Abcc8,Abi3bp,Ace2,Ackr3,Acvr1c,Acvrl1,Adora2a,Agbl4,Ager,Ahr,Alox5,Apc,Apln,Apod,App,Ar,Arg1,Atf2,Atf5,Atg13,B4galt1,Bak1,Bche,Bcl2,Bdkrb2,Bmp2,Bmp4,Bmp5,Bmpr2,Btg1,Btg3,Cask,Casp3,Cblb,Ccn3,Ccn5,Ccr5,Cd274,Cd37,Cd44,Cd86,Cdh5,Cdk6,Cdkn1a,Cdkn2c,Cebpa,Cer1,Cherp,Cited2,Cldn19,Cnn1,Cnot7,Cops8,Cpb2,Crp,Csf1r,Ctnna1,Ctnnb1,Ctnnbip1,Cxadr,Cxcl12,Cyp1b1,Dab2,Dab2,Dab2ip,Ddah1,Dicer1,Dlg1,Dlg5,Dusp1,D…
GO:1901653	cellular response to peptide	1.47038	263	178.865	9.7e-08	1.37016	92	67.1454	0.00891	Abcc1,Ager,Ahsg,Akt3,Ano1,App,Arhgef2,Atp1a3,Atp2b1,Cacna2d1,Crk,Ctnnb1,Cyfip1,Cyp11a1,Ednra,Epha4,Fcgr3,Fcgr3,Fer,Fyn,Ghrhr,Ghsr,Gja6,Gnai2,Gpld1,Grb14,Grm5,Gsk3b,Hdac9,Igf1,Igf1r,Igf2,Inppl1,Irf1,Irs1,Itga4,Kank1,Ldoc1,Lep,Lpin1,Lpin2,Lpl,Lrp1,Mdm2,Myo1c,Myo5a,Ncoa2,Nfe2l2,Nfkb1,Nod1,Nr1h4,Nr4a1,Nr4a2,Nr4a3,Nucks1,Osbpl8,Pid1,Pik3r1,Pip4k2a,Plcb1,Pou4f2,Pparg,Prkcd,Prkcq,Prnp,Pten,Rab31,Rab8b,R…
GO:0032231	regulation of actin filament bundle assembly	1.70239	144	84.5869	1.13e-07	1.44291	46	31.88	0.0425	Arap1,Arhgef10l,Arhgef5,Bag4,Bbs4,Ccn2,Clasp1,Coro2b,Dbn1,Epha1,F11r,Fermt2,Map3k1,Met,Mtor,Mtss1,Nf2,Nrp1,Pfn1,Pfn2,Pfn3,Pik3r1,Plek,Ppm1f,Prkcq,Prkn,Ptger4,Pxn,Rac1,Rdx,Rgcc,Rhpn2,S1pr1,Sh3pxd2b,Sorbs3,Stmn1,Swap70,Synpo2,Tacr1,Tgfb3,Tgfbr1,Tjp1,Tmeff2,Tpm1,Ttc8,Wasf2
GO:0035265	organ growth	1.44511	280	193.757	1.26e-07	1.44808	67	46.2683	0.00945	Adra1a,Ahr,Apc,Ar,Bcl2,Bcl2l11,Cacna1c,Ccnb1,Cdk1,Cdk1,Cited2,Col14a1,Ctdp1,Cxadr,Ddr2,Dusp6,Esr1,Ext1,Fgf20,Fgf8,Fgf9,Fgfr1,Fgfr2,Foxp1,Gata4,Gata6,Gja6,Gli1,Gm49361,Hey2,Hlx,Igf1,Igf2,Jarid2,Kdr,Lep,Lepr,Lmx1b,Mapk1,Mef2c,Meis1,Mtor,Ncam1,Notch1,Nr3c1,Pdgfrb,Pi16,Ppara,Prlr,Prox1,Pten,Ptk2,Rgs2,Sash3,Sav1,Smad2,Smo,Smpd3,Spry2,Stk3,Tbx2,Tgfbr1,Tgfbr2,Vgll4,Wwc1,Wwc2,Zfpm2
GO:0002763	positive regulation of myeloid leukocyte differentiation	1.88147	105	55.8075	1.37e-07	1.79723	36	20.0308	0.00236	Car2,Ccl5,Cd101,Cd4,Cd74,Creb1,Csf1,Csf1r,Ctnnbip1,Dcstamp,Evi2,Fadd,Fes,Fos,Gpr68,Gsk3b,Hax1,Id2,Il12b,Il34,Itgb3,Jun,Kitl,Lef1,Lif,Notch2,Pou4f2,Ppargc1b,Ppp3ca,Ripk1,Ror2,Runx1,Slc9b2,Tmem64,Trib1,Zfp36l1
GO:0040017	positive regulation of locomotion	1.25586	657	523.146	1.44e-07	1.45682	254	174.352	2.35e-09	Abcc1,Abl2,Ackr3,Acta2,Actr3,Acvr1,Acvr1b,Adam17,Adamts1,Adra2a,Ager,Akap12,Akt3,Aldoa,Amot,Amotl1,Angpt1,Angptl3,Apc,App,Aqp1,Arf6,Arhgap5,Arhgef2,Bag4,Bcas3,Bcl2,Bmp2,Bmp4,Bmpr2,Bves,C3ar1,Camk2d,Capn7,Casr,Cbll1,Ccbe1,Ccdc25,Ccl5,Ccr5,Ccr7,Cd274,Cd74,Cdh5,Clasp1,Cldn4,Cpne3,Creb3,Crk,Csf1,Csf1r,Cttn,Cxcl12,Cxcl13,Cxcr4,Cyp1b1,Dab2,Dab2,Dab2ip,Ddr2,Diaph1,Dicer1,Dnm1l,Dock4,Dock5,Duox2,Duoxa2,E…
GO:0071495	cellular response to endogenous stimulus	1.22365	799	652.963	1.77e-07	1.20002	281	234.163	0.00538	Abcc1,Acap2,Actr3,Acvr1,Acvr2a,Acvrl1,Adam17,Adamts12,Adra2a,Ager,Ahr,Ahsg,Akap7,Akt3,Amigo1,Ano1,Aoc1l1,Apaf1,App,Aqp1,Ar,Arf6,Arhgef2,Aspn,Atf2,Atp1a1,Atp1a3,Atp2b1,Bag4,Bcas3,Bmp2,Bmp4,Bmpr1b,Bmpr2,Brms1l,Cacna2d1,Casp3,Casp7,Castor1,Cd44,Cer1,Cftr,Cited2,Col1a2,Col2a1,Col3a1,Cpeb3,Cpeb4,Crebbp,Crk,Ctnna1,Ctnnb1,Cyfip1,Cyp11a1,Dab2,Dab2,Dab2ip,Dbn1,Diaph1,Dnmt3a,Dnmt3c,Dusp22,Dync1li1,Ednra,Ef…
GO:0010594	regulation of endothelial cell migration	1.44048	279	193.686	1.82e-07	1.37442	76	55.2962	0.0181	Acvrl1,Adam17,Adamts9,Ager,Akt3,Amot,Amotl1,Angpt1,Bcas3,Bmp4,Bmper,Bmpr2,Ccbe1,Cxcl13,Dab2ip,Dcn,Dicer1,Epha2,Ets1,Fbxw7,Fgf1,Fgf18,Fgfbp1,Fgfr1,Foxp1,Gata3,Glul,Gpi1,Gpld1,Hdac7,Hdac9,Hif1a,Igf1,Igf2,Itgb3,Jcad,Kdr,Klf4,Map2k3,Map2k5,Map3k3,Mef2c,Meox2,Met,Nf1,Nfe2l2,Nos3,Notch1,Nr2f2,Nrp1,Pdpk1,Pik3cg,Plpp3,Pparg,Prkd1,Prl,Prox1,Ptgs2,Ptprm,Rac1,Rgcc,Rhoj,Rin2,Sash1,Sema4a,Serpinf1,Slit2,Sparc…
GO:0031589	cell-substrate adhesion	1.34316	400	297.804	2.48e-07	1.38744	137	98.7433	0.000445	Abi3bp,Acer2,Acvrl1,Adamts12,Adamts9,Agr2,Angpt1,Angptl3,Antxr1,Ap1ar,Apod,Atrn,Atrnl1,Atxn3,B4galt1,Bcas3,Bcl2,Bcl2l11,Bst1,Bves,Cask,Ccdc80,Ccn2,Cd34,Cdk6,Clasp1,Cntn2,Col3a1,Col8a1,Coro2b,Crk,Csf1,Ctnnb1,Dab2,Dab2,Dag1,Dbn1,Dicer1,Dmp1,Dock5,Dusp22,Ecm2,Efemp2,Efna5,Egfl6,Egflam,Enpp2,Epb41l5,Epha1,Epha3,Ephb1,Ephb3,Fat2,Fbln1,Fer,Fermt1,Fermt2,Fmn1,Fndc3b,Frem1,Fzd4,Gcnt2,Grem1,Gsk3b,Hsd17b12…
GO:0045927	positive regulation of growth	1.36219	366	268.685	2.74e-07	1.40858	122	86.612	0.000569	Acsl4,Actn3,Adam17,Afdn,Agr2,Ahi1,Ahr,Armc10,Avpr1a,Bbs4,Bcl11a,Bcl2,Bmpr2,Ccnb1,Cd81,Cdh4,Cdk1,Cdk1,Cdkn2aip,Chd7,Cntf,Creb1,Crk,Cryaa,Csf1,Cxcl12,Cxcr4,Cyfip1,Dbn1,Ddx3x,Dlg1,Efna5,Egfr,Extl3,F2,Fgf8,Fgf9,Fgfr1,Fgfr2,Foxs1,Gata4,Gata6,Ghrh,Ghrhr,Ghsr,Gli1,Gsk3b,Hey2,Hlx,Igf1,Igf1r,Igf2,Ilk,Ist1,Itsn2,Lep,Lgi1,Lrp1,Macf1,Map2k5,Map3k13,Mapk1,Mapkap1,Mapt,Mef2c,Megf8,Mtor,Mtpn,Myo5b,N6amt1,Ncam1,…
GO:0110053	regulation of actin filament organization	1.44973	261	180.033	3e-07	1.38522	102	73.6343	0.00368	Abi2,Actr3,Ap1ar,Arap1,Arf6,Arhgap18,Arhgap35,Arhgef10l,Arhgef5,Arpc5,Bag4,Baiap2l1,Baiap2l2,Bbs4,Bin1,Capza2,Ccn2,Cdc42ep2,Cdc42ep3,Clasp1,Coro2b,Cttn,Cyfip1,Cyria,Cyrib,Daam2,Dbn1,Dlg1,Dstn,Epha1,Eps8,F11r,F2rl1,Fchsd2,Fer,Fermt2,Fhod3,Fmn1,Hax1,Kank1,Kirrel,Lmod3,Map3k1,Met,Mtor,Mtpn,Mtss1,Myo1c,Nck2,Nf2,Nrp1,Pak3,Pecam1,Pfn1,Pfn2,Pfn3,Pick1,Pik3r1,Plek,Ppm1f,Prkcd,Prkce,Prkcq,Prkn,Ptger4,Pxn,…
GO:0007229	integrin-mediated signaling pathway	1.6966	134	78.9814	4.29e-07	1.71857	48	27.9302	0.000949	Arhgap35,Ccn2,Cd177,Cd40lg,Col3a1,Ctnna1,Cul3,Dab2,Dab2,Fermt1,Fermt2,Fgr,Fut8,Fyb,Gab2,Ilk,Itga1,Itga2,Itga4,Itga9,Itgav,Itgb1,Itgb3,Itgb4,Itgb6,Lama2,Lama3,Lama5,Lamb1,Lamb2,Lims1,Nrp1,Phactr4,Plek,Plpp3,Ptk2,Ptn,Pxn,Sema7a,Slc2a10,Src,Syk,Tec,Timp1,Tln1,Tspan32,Txk,Vav3
GO:0045936	negative regulation of phosphate metabolic process	1.32452	421	317.851	4.64e-07	1.23686	149	120.467	0.0255	Actn3,Adora2a,Ager,Ahr,Akap1,Angpt1,Ankle2,Apc,Atg14,Atxn1,Atxn7,Bag4,Bak1,Bdkrb2,Bmp2,Bmp4,Bod1,Casp3,Cbl,Cblb,Ccnb1,Cda,Cdk5rap1,Cdk5rap3,Cdkn1a,Cdkn2c,Cnksr3,Cox11,Cry2,Ctdsp2,Ctdspl,Dab2ip,Ddr2,Dkk1,Dnaja1,Dnajc10,Dtnbp1,Dusp1,Dusp10,Dusp16,Dusp19,Dusp22,Dusp6,Ensa,Epha1,Errfi1,Fbln1,Fem1al,Gfra2,Gm49361,Gnai2,Grem1,Gsk3b,Hgf,Hnf1a,Ibtk,Igf1,Ikbkb,Ilk,Inpp5j,Inppl1,Irf1,Jun,Kirrel,Klhl31,Lpin…

## Sheet: Liver enhancers down guinea pig
GO	Name	Binom Enrichment	# foreground regions	# expected regions	Binom BH p-value	Hyper Enrichment	# foreground genes	# expected genes	Hyper BH p-value	Genes	Regions
GO:0062012	regulation of small molecule metabolic process	2.4821	104	41.9	3.95e-13	1.94809	55	28.2328	0.000145	Anxa1,App,C1qtnf3,Cpt1a,Cry1,Dkk3,Elovl5,Ephx2,Erlin2,Fabp5,Fgf1,Fmo5,Foxa2,Foxk1,Gpld1,Hif1a,Igf1,Inpp5k,Insig1,Irs1,Kat2b,Kat2b,Kcnma1,Khk,Kit,Ldlr,Lepr,Lmf1,Mid1ip1,Myc,Ncoa2,Nfkb1,Nnmt,Nos3,Nr1d1,Nr3c1,P2ry6,Park7,Ppara,Pparg,Ppargc1a,Ppp1cb,Prkag2,Prkce,Ptk2b,Rora,Scp2,Sec14l2,Slc45a3,Snai1,Soga1,Sorbs1,Srebf1,Thrb,Ttc39b
GO:0006109	regulation of carbohydrate metabolic process	3.09457	70	22.6203	9.02e-13	2.07021	31	14.9743	0.00367	App,C1qtnf3,Cry1,Foxa2,Foxk1,Gpld1,Hif1a,Igf1,Inpp5k,Irs1,Kat2b,Kat2b,Khk,Lepr,Myc,Ncoa2,Nfkb1,Nnmt,Nr3c1,P2ry6,Pdgfb,Ppara,Ppargc1a,Ppp1cb,Prkag2,Prkce,Ptk2b,Rora,Slc45a3,Soga1,Sorbs1
GO:0045834	positive regulation of lipid metabolic process	3.13539	64	20.4121	6.36e-12	2.3438	34	14.5064	0.000221	Abhd6,Angptl3,Anxa1,App,Cpt1a,Cyp17a1,Disp3,Elovl5,Fgf1,Flt1,Gpld1,Igf1,Igf1r,Irs1,Ldlr,Mid1ip1,Nr1d1,Pdgfb,Pdgfra,Pdgfrb,Ppara,Pparg,Ppargc1a,Prkcd,Prkce,Ptk2b,Scd1,Scp2,Sec14l2,Slc45a3,Sorbs1,Srebf1,Tek,Vav2
GO:0010632	regulation of epithelial cell migration	2.3148	104	44.9284	1.02e-11	2.58389	53	20.5117	1.15e-07	Adamts9,Adgra2,Akt3,Anxa1,Anxa3,Aqp1,Arsb,Bcar1,Bmp4,Clasp1,Coro1c,Dcn,Dock5,Dusp10,Emp2,Ets1,Fgf1,Foxp1,Gpld1,Hdac6,Hdac7,Hif1a,Hyal1,Igf1,Irs1,Itgb1bp1,Jcad,Jun,Klf4,Macir,Map2k3,Mcc,Met,Nos3,Nrp1,Pdgfb,Pfn2,Plpp3,Pparg,Prkce,Prkd2,Ptk2b,Robo4,Sash1,Serpinf1,Smoc2,Tek,Tgfb2,Tgfbr2,Tgfbr3,Vegfa,Wnt5a,Zc3h12a
GO:0010631	epithelial cell migration	2.14271	119	55.5371	1.55e-11	2.47917	64	25.8151	1.16e-08	Adamts9,Adgra2,Akt3,Anxa1,Anxa3,Aqp1,Arsb,Bcar1,Bmp4,Clasp1,Clec14a,Coro1c,Dcn,Dock5,Dusp10,Emp2,Ets1,Fgf1,Foxp1,Fstl1,Gpld1,Hdac6,Hdac7,Hif1a,Hyal1,Igf1,Irs1,Itgb1,Itgb1bp1,Jcad,Jun,Kank1,Kit,Kitl,Klf4,Macir,Map2k3,Mcc,Met,Nos3,Nrp1,Pdgfb,Pfn2,Plpp3,Pparg,Prkce,Prkd2,Ptk2b,Pxn,Robo4,Rock1,Sash1,Serpinf1,Smoc2,Snai1,Srf,Tek,Tgfb2,Tgfbr2,Tgfbr3,Vegfa,Wnt5a,Zc3h12a,Zeb2
GO:0010675	regulation of cellular carbohydrate metabolic process	3.21348	57	17.7378	3.85e-11	2.05784	26	12.6346	0.00886	C1qtnf3,Cry1,Foxa2,Foxk1,Gpld1,Hif1a,Igf1,Inpp5k,Irs1,Kat2b,Kat2b,Khk,Lepr,Ncoa2,Nnmt,Nr3c1,P2ry6,Ppara,Ppargc1a,Ppp1cb,Prkce,Ptk2b,Rora,Slc45a3,Soga1,Sorbs1
GO:0042060	wound healing	2.54587	79	31.0307	8.98e-11	2.36993	39	16.4562	5.01e-05	Adrb1,Anxa1,Aqp1,Cask,Ccl2,Cd34,Cd9,Clasp1,Cldn4,Cnn2,Crp,Ext1,F11,Fgf1,Foxa2,Igf1,Itgb1,Itgb6,Kank1,Klkb1,Notch2,Nrg1,Pdgfb,Pdgfra,Plpp3,Ppara,Pparg,Prkcd,Prkce,Prkg1,Serpinf2,Smoc2,Srsf6,St3gal4,Tafa5,Tgfb2,Tpm1,Ubash3b,Wnt5a
GO:0010634	positive regulation of epithelial cell migration	2.58173	78	30.2123	8.98e-11	2.8093	39	13.8824	1.47e-06	Adgra2,Akt3,Anxa1,Anxa3,Aqp1,Bcar1,Bmp4,Clasp1,Dock5,Ets1,Fgf1,Foxp1,Gpld1,Hdac6,Hdac7,Hif1a,Hyal1,Igf1,Irs1,Itgb1bp1,Jcad,Jun,Map2k3,Met,Nos3,Nrp1,Pdgfb,Plpp3,Prkce,Prkd2,Ptk2b,Sash1,Smoc2,Tek,Tgfb2,Tgfbr2,Vegfa,Wnt5a,Zc3h12a
GO:0009611	response to wounding	2.19497	103	46.9255	1.14e-10	2.13054	55	25.8151	1.51e-05	Adrb1,Anxa1,Aqp1,Cask,Casp3,Ccl2,Cd34,Cd9,Clasp1,Cldn4,Cnn2,Crp,Dpysl3,Ednra,Ext1,F11,Fgf1,Foxa2,Foxf1,Grin2a,Igf1,Igf1r,Il10,Itgb1,Itgb6,Jun,Kank1,Klf4,Klkb1,Mmp2,Ndel1,Notch2,Nrg1,Pdgfb,Pdgfra,Plpp3,Ppara,Pparg,Prkcd,Prkce,Prkg1,Ptprf,Serpinf2,Smoc2,Srsf5,Srsf6,St3gal4,Sulf2,Tafa5,Tgfb2,Tpm1,Ubash3b,Wnt5a,Zfp36l1,Zfp36l2
GO:0062013	positive regulation of small molecule metabolic process	2.95283	61	20.6581	1.14e-10	2.01275	27	13.4145	0.00959	Anxa1,App,Cpt1a,Elovl5,Fgf1,Gpld1,Hif1a,Igf1,Irs1,Kat2b,Kat2b,Mid1ip1,Myc,Nnmt,Nos3,Nr1d1,P2ry6,Park7,Ppara,Pparg,Ppargc1a,Prkce,Scp2,Sec14l2,Slc45a3,Sorbs1,Srebf1
GO:0005996	monosaccharide metabolic process	2.63039	72	27.3724	1.59e-10	1.77682	37	20.8237	0.0103	Aldh1a1,C1qtnf3,Cpt1a,Cry1,Fabp5,Fggy,Foxa2,Foxk1,Fuom,Galm,Gclc,Gpld1,Hif1a,Igf1,Inpp5k,Irs1,Kat2b,Kat2b,Khk,Lepr,Man2a1,Mdh1,Myc,Ncoa2,Nnmt,Nr3c1,Onecut1,Pgm2,Pgm5,Ppara,Ppargc1a,Ppp1cb,Rbks,Rora,Slc45a3,Soga1,Sorbs1
GO:0009725	response to hormone	1.96794	128	65.0425	2.15e-10	1.94954	78	40.0095	2.93e-06	Acaca,Akt3,Anxa1,Aqp1,Arsb,Atp1a1,Bcar1,Bmp4,C1qtnf9,Cry1,Csk,Edn1,Ednra,Efna5,Esr1,Gclc,Gnrh1,Gpld1,Igf1,Igf1r,Il10,Inhba,Inpp5k,Insig1,Irf1,Irs1,Kank1,Kat2b,Kat2b,Kcnma1,Khk,Kit,Klf9,Lepr,Lmo2,Me1,Mmp14,Mmp2,Ncoa2,Nfkb1,Nos3,Nr1d1,Nr3c1,Nucks1,P2ry6,Pld1,Ppara,Pparg,Ppargc1a,Prkcd,Prkce,Prkcq,Ptgdr,Ptprf,Rab8b,Rdx,Rock1,Serpina1a,Socs2,Sorbs1,Sorl1,Srf,Srsf5,Stat2,Tek,Tgfb2,Tgfb3,Tgfbr3,Thrb,Ti…
GO:0044262	cellular carbohydrate metabolic process	2.42982	81	33.3358	2.7e-10	1.76247	40	22.6954	0.00863	Adrb1,Angptl3,B3gnt2,C1qtnf3,Cry1,Ext1,Ext2,Fggy,Foxa2,Foxk1,Gpld1,Hif1a,Idh2,Igf1,Il6st,Inpp5a,Inpp5k,Irs1,Kat2b,Kat2b,Khk,Lepr,Ncoa2,Nnmt,Nr1d1,Nr3c1,P2ry6,Pgm2,Ppara,Ppargc1a,Ppp1cb,Prkag2,Prkce,Ptk2b,Pygl,Rora,Slc45a3,Soga1,Sorbs1,Ugp2
GO:0008203	cholesterol metabolic process	3.4225	46	13.4405	5.4e-10	2.15259	23	10.6848	0.00959	Abca1,Angptl3,App,Cebpa,Cyp46a1,Disp3,Ephx2,Erlin2,Fdx1,Fgf1,Fmo5,Hmgcs2,Insig1,Ldlr,Lepr,Lmf1,Lss,Mvk,Scp2,Sec14l2,Srebf1,Thrb,Ttc39b
GO:0006006	glucose metabolic process	2.73848	62	22.6403	9.69e-10	1.82331	31	17.0021	0.0153	C1qtnf3,Cpt1a,Cry1,Fabp5,Foxa2,Foxk1,Galm,Gpld1,Hif1a,Igf1,Inpp5k,Irs1,Kat2b,Kat2b,Khk,Lepr,Mdh1,Myc,Ncoa2,Nnmt,Nr3c1,Onecut1,Pgm2,Pgm5,Ppara,Ppargc1a,Ppp1cb,Rora,Slc45a3,Soga1,Sorbs1
GO:0019216	regulation of lipid metabolic process	2.14254	98	45.7401	1.02e-09	1.99078	59	29.6367	3.79e-05	Abca7,Abhd6,Angptl3,Anxa1,App,Atp1a1,Cpt1a,Cyp17a1,Disp3,Dkk3,Elovl5,Ephx2,Erlin2,Esr1,Fabp5,Fgf1,Flt1,Fmo5,Foxa2,Gpld1,Igf1,Igf1r,Igfbp7,Insig1,Irs1,Kcnma1,Kit,Lactb,Ldlr,Lmf1,Mid1ip1,Ncoa2,Nfkb1,Nr1d1,Nr3c1,Pdgfb,Pdgfra,Pdgfrb,Ppara,Pparg,Ppargc1a,Prkag2,Prkcd,Prkce,Ptk2b,Rora,Scd1,Scp2,Sec14l2,Slc45a3,Snai1,Sorbs1,Sorl1,Srebf1,Tek,Thra,Thrb,Ttc39b,Vav2
GO:0019318	hexose metabolic process	2.60492	67	25.7205	1.02e-09	1.72995	34	19.6538	0.0196	Aldh1a1,C1qtnf3,Cpt1a,Cry1,Fabp5,Foxa2,Foxk1,Fuom,Galm,Gpld1,Hif1a,Igf1,Inpp5k,Irs1,Kat2b,Kat2b,Khk,Lepr,Man2a1,Mdh1,Myc,Ncoa2,Nnmt,Nr3c1,Onecut1,Pgm2,Pgm5,Ppara,Ppargc1a,Ppp1cb,Rora,Slc45a3,Soga1,Sorbs1
GO:0002274	myeloid leukocyte activation	2.59453	67	25.8236	1.12e-09	1.74597	32	18.3279	0.0217	Adora3,Anxa1,Anxa3,App,Bcl10,Bcr,Cebpa,Clu,Dcstamp,Dnase1l3,Foxf1,Foxp1,Hyal2,Il10,Itgb6,Jun,Kit,Ldlr,Mfhas1,Nampt,Notch2,Nr1d1,Pja2,Plpp6,Pparg,Prkcd,Prkce,Ptgdr,Rora,Syk,Tgfbr2,Wnt5a
GO:0010906	regulation of glucose metabolic process	3.31391	46	13.8809	1.18e-09	2.20377	22	9.98288	0.00921	C1qtnf3,Cry1,Foxa2,Foxk1,Gpld1,Hif1a,Igf1,Inpp5k,Irs1,Kat2b,Kat2b,Khk,Lepr,Ncoa2,Nnmt,Nr3c1,Ppara,Ppp1cb,Rora,Slc45a3,Soga1,Sorbs1
GO:0045913	positive regulation of carbohydrate metabolic process	3.50378	42	11.9871	1.73e-09	2.41354	16	6.62926	0.0151	App,Gpld1,Hif1a,Igf1,Irs1,Kat2b,Kat2b,Myc,Nfkb1,Nnmt,P2ry6,Pdgfb,Ppara,Prkce,Slc45a3,Sorbs1
GO:0001667	ameboidal-type cell migration	1.82676	141	77.1859	1.87e-09	2.28865	83	36.2659	1.22e-09	Adamts9,Adgra2,Akt3,Anxa1,Anxa3,Aqp1,Arid5b,Arsb,Bcar1,Bmp4,Clasp1,Clec14a,Coro1c,Crb2,Cygb,Dcn,Dock5,Dusp10,Edn1,Ednra,Efnb1,Emp2,Ets1,Fgf1,Foxp1,Fstl1,Gbx2,Gpld1,Hdac6,Hdac7,Hif1a,Hyal1,Hyal2,Igf1,Irs1,Itgb1,Itgb1bp1,Jcad,Jun,Kank1,Kit,Kitl,Klf4,Macir,Map2k3,Mcc,Mesp2,Met,Nos3,Nrp1,Nrp2,Pafah1b1,Pdgfb,Pdlim1,Pfn2,Plpp3,Pparg,Prkce,Prkd2,Ptk2b,Pxn,Robo4,Rock1,Sash1,Sema3f,Sema4c,Serpinf1,Smoc2,S…
GO:0030224	monocyte differentiation	5.0179	28	5.58002	1.91e-09	5.0372	11	2.18375	0.000315	Bmp4,Csf1,Dcstamp,Foxp1,Gpr68,Ifi203,Jun,Myc,Pparg,Vegfa,Zfp36l1
GO:0030099	myeloid cell differentiation	2.12384	97	45.6719	2.13e-09	1.77589	50	28.1548	0.00245	Actn1,Bmp4,Car2,Casp3,Cebpa,Cebpb,Cebpe,Csf1,Csf1r,Dcstamp,Dlk1,Epas1,Ets1,Fos,Foxp1,Gabpa,Gpr68,Hif1a,Ifi203,Il23a,Inhba,Itgb6,Itpkb,Jun,Kit,Kitl,Lmo2,Mfhas1,Mturn,Myc,Ncoa6,Nfatc1,Ninj1,Notch2,Pparg,Ppp3ca,Ptk2b,Rbfox2,Smad5,Srf,Tcirg1,Tgfbr2,Tgfbr3,Thra,Tob2,Trib1,Ubash3b,Vegfa,Zbtb16,Zfp36l1
GO:1902430	negative regulation of amyloid-beta formation	6.83728	21	3.07139	2.81e-09	5.27963	7	1.32585	0.00616	Abca7,Clu,Igf1,Prnp,Rock1,Sorl1,Spon1
GO:1902652	secondary alcohol metabolic process	3.11132	47	15.1061	4.25e-09	2.05151	24	11.6987	0.012	Abca1,Angptl3,App,Cebpa,Cyp46a1,Disp3,Ephx2,Erlin2,Fdx1,Fgf1,Fmo5,Hmgcs2,Idh2,Insig1,Ldlr,Lepr,Lmf1,Lss,Mvk,Scp2,Sec14l2,Srebf1,Thrb,Ttc39b
GO:0015770	sucrose transport	19.5562	11	0.562482	4.25e-09	7.69317	3	0.389956	0.0422	Slc45a1,Slc45a3,Slc45a4
GO:0061614	miRNA transcription	3.30137	43	13.0249	4.67e-09	3.86415	22	5.69336	6.48e-06	App,Bmp4,Ets1,Fos,Hif1a,Il10,Jun,Klf4,Klf5,Myc,Nfatc3,Nfib,Nfkb1,Nr3c1,Pdgfb,Ppara,Pparg,Smad1,Srebf1,Srf,Tgfb2,Wt1
GO:0010676	positive regulation of cellular carbohydrate metabolic process	4.21585	31	7.3532	8.75e-09	2.40412	12	4.99144	0.0378	Gpld1,Hif1a,Igf1,Irs1,Kat2b,Kat2b,Nnmt,P2ry6,Ppara,Prkce,Slc45a3,Sorbs1
GO:0006066	alcohol metabolic process	2.20213	83	37.6908	9.86e-09	1.81016	48	26.517	0.00228	Abca1,Adh6a,Aldh1a1,Angptl3,App,Asah2,Cbr4,Cebpa,Chka,Cyp46a1,Dhrs3,Disp3,Dkk3,Ephx1,Ephx2,Erlin2,Fdx1,Fgf1,Fmo5,Hao1,Hmgcs2,Hsd11b2,Idh2,Inpp5a,Inpp5k,Insig1,Itpkb,Kcnma1,Ldlr,Lepr,Lmf1,Lss,Mvk,Nfkb1,Nudt4,P2ry6,Park7,Plb1,Plpp3,Ptk2b,Qdpr,Scp2,Sec14l2,Sgpp1,Sptlc2,Srebf1,Thrb,Ttc39b
GO:0006809	nitric oxide biosynthetic process	3.81307	34	8.91669	1.29e-08	2.37444	15	6.31729	0.0213	App,Cd34,Clu,Crp,Ddah1,Dnm2,Esr1,Igf1,Il10,Klf4,Nos3,Ptk2b,Rora,Sirpb1c,Zc3h12a
GO:1902895	positive regulation of miRNA transcription	3.5262	37	10.4929	1.55e-08	3.97923	18	4.52349	3.72e-05	Bmp4,Ets1,Fos,Hif1a,Il10,Jun,Klf4,Klf5,Myc,Nfkb1,Nr3c1,Pdgfb,Pparg,Smad1,Srebf1,Srf,Tgfb2,Wt1
GO:0030334	regulation of cell migration	1.52142	223	146.574	1.9e-08	1.84489	140	75.8855	1.22e-09	Abhd6,Adamts9,Adgra2,Adgrg3,Adora3,Afdn,Akt3,Angptl3,Anxa1,Anxa3,App,Aqp1,Arsb,Bcar1,Bcr,Bmp4,Ccl2,Cd9,Clasp1,Cldn4,Cnn2,Coro1c,Csf1,Csf1r,Cygb,Dcn,Dlc1,Dnm1l,Dock4,Dock5,Dpysl3,Dusp1,Dusp10,Edn1,Ednra,Emp2,Ets1,Fgf1,Flt1,Foxf1,Foxp1,Gnrh1,Gpld1,Hdac6,Hdac7,Hif1a,Hyal1,Hyal2,Idh2,Igf1,Igf1r,Il23a,Il6st,Irs1,Itgb1,Itgb1bp1,Jcad,Jun,Kank1,Kit,Kitl,Klf4,Lama2,Lamb1,Ldb2,Macir,Map2k3,Mcc,Met,Mmp14,Mm…
GO:0005975	carbohydrate metabolic process	1.88896	113	59.8212	2.83e-08	1.54144	66	42.8172	0.00807	Adrb1,Aldh1a1,Angptl3,App,B3galnt1,B3gnt2,C1qtnf3,Chid1,Chst7,Cpt1a,Cry1,Ext1,Ext2,Fabp5,Fggy,Foxa2,Foxk1,Fuom,Galm,Gclc,Gpld1,Hif1a,Hyal1,Hyal2,Idh2,Igf1,Il6st,Inpp5a,Inpp5k,Irs1,Kat2b,Kat2b,Khk,Lepr,Man2a1,Manba,Mdh1,Myc,Ncoa2,Nfkb1,Nnmt,Nr1d1,Nr3c1,Onecut1,P2ry6,Pdgfb,Pgm2,Pgm5,Ppara,Ppargc1a,Ppp1cb,Prkag2,Prkce,Ptk2b,Pygl,Rbks,Rora,Slc45a3,Soga1,Sorbs1,St3gal4,St6galnac3,St6galnac5,St8sia2,Ug…
GO:0032870	cellular response to hormone stimulus	2.09065	88	42.0921	2.92e-08	2.11624	51	24.0993	3.79e-05	Acaca,Akt3,Anxa1,Aqp1,Atp1a1,Bcar1,Bmp4,C1qtnf9,Csk,Edn1,Ednra,Efna5,Esr1,Gpld1,Igf1,Igf1r,Inhba,Inpp5k,Insig1,Irf1,Irs1,Kank1,Kat2b,Kat2b,Kit,Klf9,Lmo2,Ncoa2,Nfkb1,Nr3c1,Nucks1,P2ry6,Pparg,Ppargc1a,Prkcd,Prkce,Prkcq,Ptgdr,Ptprf,Rab8b,Rdx,Socs2,Sorbs1,Sorl1,Thrb,Trarg1,Trim63,Ugt1a6b,Wt1,Zfp36l1,Zfp36l2
GO:0032787	monocarboxylic acid metabolic process	1.9292	106	54.945	2.95e-08	1.44219	64	44.377	0.0258	Acaa2,Acaca,Acad11,Acot4,Acot6,Acsm2,Acsm5,Adh6a,Aldh1a1,Aldh1a3,Angptl3,Anxa1,App,Asah2,Auh,C1qtnf9,Cbr4,Cpt1a,Cygb,Cyp2a22,Cyp2a5,Dagla,Decr2,Dld,Echdc1,Edn1,Elovl4,Elovl5,Ephx1,Ephx2,Erlin2,Fabp5,Foxk1,Grhpr,Hacd3,Hao1,Hif1a,Idh2,Igf1,Insig1,Irs1,Khk,Kit,Lipg,Me1,Mecr,Mid1ip1,Mrs2,Myc,Nr1d1,Park7,Ppara,Pparg,Ppargc1a,Prkab2,Prkag2,Prkce,Scd1,Scp2,Slc45a3,Srebf1,Srr,Them4,Ugt1a6b
GO:0032963	collagen metabolic process	3.52563	35	9.92731	4.11e-08	2.56439	21	8.18908	0.00253	Bmp4,Ccl2,Cygb,Errfi1,Hif1a,Il6ra,Itgb1,Mmp14,Mmp15,Mmp2,Pdgfb,Pdgfrb,Pepd,Pparg,Prkcd,Rap1a,Rapgef3,Serpinf2,Tgfb3,Tgfbr3,Tram2
GO:0045428	regulation of nitric oxide biosynthetic process	4.00914	30	7.48289	4.11e-08	2.41573	13	5.3814	0.0293	App,Cd34,Clu,Crp,Ddah1,Dnm2,Esr1,Igf1,Il10,Klf4,Ptk2b,Sirpb1c,Zc3h12a
GO:0042116	macrophage activation	3.1329	40	12.7677	6.53e-08	2.05151	16	7.79912	0.0432	App,Cebpa,Clu,Foxp1,Il10,Jun,Ldlr,Mfhas1,Nampt,Nr1d1,Pja2,Pparg,Prkce,Rora,Syk,Wnt5a
GO:0010595	positive regulation of endothelial cell migration	2.52337	56	22.1925	9.42e-08	2.86028	29	10.1389	3.49e-05	Adgra2,Akt3,Anxa1,Anxa3,Bcar1,Bmp4,Ets1,Fgf1,Foxp1,Gpld1,Hdac7,Hif1a,Igf1,Itgb1bp1,Jcad,Map2k3,Met,Nos3,Nrp1,Pdgfb,Plpp3,Prkd2,Ptk2b,Sash1,Smoc2,Tek,Vegfa,Wnt5a,Zc3h12a
GO:0030097	hemopoiesis	1.79338	118	65.7975	1.49e-07	1.70435	65	38.1377	0.00104	Ahctf1,Ahr,Anxa1,Bcr,Bmp4,Car2,Cd34,Cd46,Cebpa,Cebpb,Cnn2,Csf1,Csf1r,Dcstamp,Dlk1,Dusp10,Epas1,Ets1,Fos,Foxp1,Gabpa,Gpr68,Hif1a,Hlx,Il10,Il23a,Inhba,Irf1,Itpkb,Jun,Kit,Kitl,Klf4,Lmo2,Meaf6,Mknk2,Mmp14,Mturn,Myc,Ninj1,Notch2,Ppp3ca,Ptk2b,Rbfox2,Sash3,Selplg,Sh3rf1,Smarcb1,Sox13,Syk,Tcim,Tek,Tgfb2,Tgfbr2,Tgfbr3,Tob2,Trib1,Ubash3b,Wbp1l,Zbtb16,Zc3h12a,Zfp36l1,Zfp36l2,Zfp608,Zmiz1
GO:0051336	regulation of hydrolase activity	1.59019	171	107.535	2e-07	1.71153	118	68.9443	1.47e-06	Adrb1,Afdn,Ahr,Angptl3,Anxa1,Aph1b,App,Aqp1,Arhgap15,Arhgef5,Arl6ip1,Arrb1,Asap1,Asap2,Asph,Bcl10,Bcl2l11,Bcr,Bid,Bod1,Calm1,Cblb,Ccl2,Chn2,Cldn4,Coro1c,Cradd,Crb2,Dapk1,Ddx3x,Dennd1a,Dgki,Dlc1,Efna5,Eif5,Esr1,Fgfr2,Flt1,Gm29094,Gnat1,Ifi203,Igf1,Il9,Iqgap2,Itgb1,Itgb1bp1,Itih1,Itih3,Klf4,Lepr,Lmf1,Met,Mtss2,Mul1,Myc,Ndel1,Ngf,Nos3,Nuak1,P2rx1,Pafah1b1,Papln,Park7,Pawr,Pcsk1n,Pdgfra,Pdgfrb,Pkp4,P…
GO:0048534	hematopoietic or lymphoid organ development	1.72688	129	74.701	2.04e-07	1.72958	75	43.3631	0.000198	Ahctf1,Ahr,Anxa1,Bcl2l11,Bcr,Bmp4,Car2,Cd34,Cd46,Cdh17,Cdkn2b,Cebpa,Cebpb,Cnn2,Csf1,Csf1r,Dcstamp,Dlk1,Dusp10,Epas1,Ets1,Fos,Foxp1,Gabpa,Gpr68,Hif1a,Hlx,Il10,Il23a,Inhba,Irf1,Itpkb,Jarid2,Jun,Kit,Kitl,Klf4,Lmo2,Mad1l1,Meaf6,Mknk2,Mmp14,Mturn,Myc,Nfatc3,Nfkb1,Ninj1,Notch2,Onecut1,Pax1,Ppp3ca,Ptk2b,Rbfox2,Sash3,Selplg,Sh3rf1,Smarcb1,Sox13,Srf,Syk,Tcim,Tek,Tgfb2,Tgfbr2,Tgfbr3,Tob2,Trib1,Ubash3b,Wbp1…
GO:0010712	regulation of collagen metabolic process	4.32511	24	5.54899	4.59e-07	3.26834	13	3.97755	0.00453	Bmp4,Ccl2,Cygb,Errfi1,Il6ra,Itgb1,Pdgfb,Pdgfrb,Pparg,Rap1a,Rapgef3,Serpinf2,Tgfb3
GO:0030155	regulation of cell adhesion	1.55304	173	111.394	6.17e-07	1.6871	100	59.2733	2.36e-05	Afdn,Anxa1,Bcar1,Bcl10,Bmp4,Cask,Casp3,Cblb,Ccl2,Cd46,Cd9,Cebpb,Clasp1,Coro1c,Coro2b,Csf1,Dlc1,Dnm2,Dock5,Dusp1,Dusp10,Efna5,Efnb1,Egflam,Emp2,Ets1,Foxf1,Gnrh1,Hlx,Hyal1,Igf1,Il10,Il23a,Il6ra,Il6st,Ildr2,Irf1,Itgb1,Itgb1bp1,Itpkb,Kank1,Kitl,Klf4,Lama2,Lamb1,Mad1l1,Mmp14,Mmp2,Myo10,Ninj1,Nrg1,Nrp1,Nuak1,Onecut1,Pawr,Pdgfb,Peli1,Plpp3,Plxna2,Plxnb1,Plxnc1,Ppara,Ppp1cb,Ppp3ca,Prex1,Prkcd,Prkce,Prkcq…
GO:0032965	regulation of collagen biosynthetic process	4.60385	22	4.77861	6.27e-07	3.41919	12	3.50961	0.00502	Bmp4,Ccl2,Cygb,Errfi1,Il6ra,Pdgfb,Pdgfrb,Pparg,Rap1a,Rapgef3,Serpinf2,Tgfb3
GO:2000147	positive regulation of cell motility	1.64113	142	86.5255	6.85e-07	1.79209	84	46.8727	2.01e-05	Adgra2,Adora3,Akt3,Angptl3,Anxa1,Anxa3,App,Aqp1,Bcar1,Bmp4,Ccl2,Cfap20,Clasp1,Cldn4,Csf1,Csf1r,Dnm1l,Dock4,Dock5,Edn1,Ednra,Ets1,Fgf1,Flt1,Foxf1,Foxp1,Gpld1,Hdac6,Hdac7,Hif1a,Hyal1,Igf1,Igf1r,Il23a,Il6st,Irs1,Itgb1,Itgb1bp1,Jcad,Jun,Kit,Kitl,Lamb1,Map2k3,Met,Mmp14,Mmp2,Myc,Nos3,Nrp1,Numb,Onecut1,P2ry2,P2ry6,Pawr,Pdgfb,Pdgfc,Pdgfra,Pdgfrb,Pld1,Plpp3,Ppp3ca,Prkce,Prkd2,Ptk2b,Ptp4a1,Rapgef3,Rdx,Rras…
GO:0010907	positive regulation of glucose metabolic process	4.34616	23	5.29202	7.76e-07	2.61673	10	3.82157	0.0411	Gpld1,Hif1a,Igf1,Irs1,Kat2b,Kat2b,Nnmt,Ppara,Slc45a3,Sorbs1
GO:0040017	positive regulation of locomotion	1.62248	146	89.9858	8.67e-07	1.76354	85	48.1986	3.14e-05	Adgra2,Adora3,Akt3,Angptl3,Anxa1,Anxa3,App,Aqp1,Artn,Bcar1,Bmp4,Ccl2,Cfap20,Clasp1,Cldn4,Csf1,Csf1r,Dnm1l,Dock4,Dock5,Edn1,Ednra,Ets1,Fgf1,Flt1,Foxf1,Foxp1,Gpld1,Hdac6,Hdac7,Hif1a,Hyal1,Igf1,Igf1r,Il23a,Il6st,Irs1,Itgb1,Itgb1bp1,Jcad,Jun,Kit,Kitl,Lamb1,Map2k3,Met,Mmp14,Mmp2,Myc,Nos3,Nrp1,Numb,Onecut1,P2ry2,P2ry6,Pawr,Pdgfb,Pdgfc,Pdgfra,Pdgfrb,Pld1,Plpp3,Ppp3ca,Prkce,Prkd2,Ptk2b,Ptp4a1,Rapgef3,Rdx…
GO:1902894	negative regulation of miRNA transcription	5.49407	18	3.27626	9.47e-07	5.12878	8	1.55982	0.00331	App,Bmp4,Nfatc3,Nfib,Pdgfb,Ppara,Pparg,Srf
GO:1901615	organic hydroxy compound metabolic process	1.75951	112	63.6542	1.02e-06	1.50123	61	40.6334	0.0162	Abca1,Adh6a,Aldh1a1,Angptl3,App,Asah2,Cbr4,Cebpa,Chka,Cpq,Cyp46a1,Dhrs3,Disp3,Dkk3,Ednra,Epas1,Ephx1,Ephx2,Erlin2,Fdx1,Fgf1,Fmo5,Grin2a,Hao1,Hif1a,Hmgcs2,Hsd11b2,Idh2,Inpp5a,Inpp5k,Insig1,Itpkb,Kcnma1,Kit,Ldlr,Lepr,Lmf1,Lss,Mrs2,Mvk,Nfkb1,Nr1d1,Nudt4,P2ry6,Park7,Plb1,Plpp3,Ptk2b,Qdpr,Scp2,Sec14l2,Sgpp1,Slc16a2,Snai1,Sptlc2,Srebf1,Tgfb2,Thrb,Ttc39b,Wnt5a,Zeb2
GO:0030335	positive regulation of cell migration	1.63209	139	85.1671	1.29e-06	1.83171	83	45.3129	1.12e-05	Adgra2,Adora3,Akt3,Angptl3,Anxa1,Anxa3,App,Aqp1,Bcar1,Bmp4,Ccl2,Clasp1,Cldn4,Csf1,Csf1r,Dnm1l,Dock4,Dock5,Edn1,Ednra,Ets1,Fgf1,Flt1,Foxf1,Foxp1,Gpld1,Hdac6,Hdac7,Hif1a,Hyal1,Igf1,Igf1r,Il23a,Il6st,Irs1,Itgb1,Itgb1bp1,Jcad,Jun,Kit,Kitl,Lamb1,Map2k3,Met,Mmp14,Mmp2,Myc,Nos3,Nrp1,Numb,Onecut1,P2ry2,P2ry6,Pawr,Pdgfb,Pdgfc,Pdgfra,Pdgfrb,Pld1,Plpp3,Ppp3ca,Prkce,Prkd2,Ptk2b,Ptp4a1,Rapgef3,Rdx,Rras2,S1pr1…
GO:0007265	Ras protein signal transduction	1.94065	83	42.7691	1.41e-06	1.67582	43	25.6591	0.012	Abca1,Adrb1,Akap13,Arhgef28,Arrb1,Bcr,Csf1,Cyth1,Dennd1a,Dennd3,Dgki,Dlc1,Dnm2,Dok2,Ednra,Eps8l3,F2rl2,Gpr17,Hacd3,Igf1,Itgb1,Itpkb,Jun,Kank1,Kctd10,Kitl,Kpnb1,Met,Ngf,Notch2,Nrg1,Nrp1,Pdgfrb,Rap1a,Rapgef1,Rapgef3,Rasgef1b,Rgl1,Rgl3,Rock1,Rras2,Spry4,Tgfb2
GO:0008202	steroid metabolic process	2.01516	74	36.7216	2e-06	1.75587	43	24.4892	0.00693	Abca1,Angptl3,App,Atp1a1,Cebpa,Cyp17a1,Cyp46a1,Disp3,Dkk3,Ephx2,Erlin2,Esr1,Fdx1,Fgf1,Fmo5,Foxa2,Hmgcs2,Hsd11b2,Igf1,Igf1r,Igfbp7,Insig1,Kcnma1,Kit,Ldlr,Lepr,Lmf1,Lss,Mvk,Nfkb1,Nr1d1,Nr3c1,Pdgfra,Ppargc1a,Rora,Scd1,Scp2,Sec14l2,Snai1,Srebf1,Thrb,Ttc39b,Ugt1a6b
GO:0035023	regulation of Rho protein signal transduction	2.90061	36	12.4112	2.05e-06	2.23639	15	6.70725	0.0304	Abca1,Akap13,Arhgef28,Arrb1,Bcr,Dlc1,Eps8l3,F2rl2,Gpr17,Itgb1,Kank1,Kctd10,Met,Nrp1,Pdgfrb
GO:0032964	collagen biosynthetic process	4.0477	23	5.68224	2.24e-06	3.08677	13	4.21153	0.00687	Bmp4,Ccl2,Cygb,Errfi1,Il6ra,Pdgfb,Pdgfrb,Pparg,Rap1a,Rapgef3,Serpinf2,Tgfb3,Tram2
GO:0007005	mitochondrion organization	1.93124	81	41.9419	2.31e-06	1.53341	47	30.6506	0.0278	Acaa2,Akt3,Atg12,Atg9b,Bcl2l11,Bid,Bnip3l,Calm1,Cebpa,Cox7a2l,Dcn,Ddhd2,Dnm1l,Edn1,Ednra,Epas1,Gclc,Golph3,Hdac6,Hif1a,Igf1,Jun,Man2a1,Mef2a,Miga1,Mrpl15,Mtfp1,Mtx2,Mul1,Myc,Park7,Pparg,Ppargc1a,Ppif,Ptcd2,Pyroxd2,Rhot1,Romo1,Slc35f6,Srebf1,Stat2,Them4,Tmem14a,Vps13a,Vps13c,Vps13d,Wdr81
GO:0043434	response to peptide hormone	2.07343	68	32.7959	2.31e-06	1.79232	39	21.7596	0.00799	Akt3,Anxa1,Bcar1,C1qtnf9,Cry1,Csk,Edn1,Ednra,Gpld1,Igf1,Igf1r,Inpp5k,Insig1,Irf1,Irs1,Kank1,Kat2b,Kat2b,Khk,Ncoa2,Nfkb1,Nucks1,Pld1,Ppara,Pparg,Prkcd,Prkcq,Ptprf,Rab8b,Rock1,Serpina1a,Sorbs1,Sorl1,Srsf5,Stat2,Tgfbr3,Trarg1,Vps13c,Zfp36l1
GO:2000278	regulation of DNA biosynthetic process	2.62995	41	15.5896	2.96e-06	2.01921	20	9.90489	0.0263	Ahr,Cct7,Dcp2,Dusp1,Grhl2,Jade1,Klf4,Meaf6,Myc,Nat10,Nek7,Pdgfb,Pdgfrb,Pparg,Prkcq,Prkd2,Ptk2b,Smoc2,Tinf2,Vegfa
GO:1901701	cellular response to oxygen-containing compound	1.55006	156	100.641	3.45e-06	1.29914	92	70.816	0.0486	Abca1,Acaca,Ahr,Akt3,Anxa1,App,Aqp1,Bcar1,Bcr,Bmp4,C1qtnf9,Ccl2,Cebpb,Clu,Cpeb4,Csk,Dapk1,Dcps,Dnm1l,Dnm2,Dnmt3a,Edn1,Ednra,Efna5,Ern1,Esr1,Fdx1,Fos,Foxp1,Gabpa,Glrx,Golph3,Gpld1,Grin2a,Hdac6,Igf1,Igf1r,Il10,Inhba,Inpp5k,Insig1,Ipo5,Irf1,Irs1,Jun,Kank1,Kat2b,Kat2b,Klf9,Ldlr,Map2k3,Mmp2,Ncoa2,Neurl1a,Nfkb1,Nr1d1,Nr3c1,Nrip1,Nucks1,P2ry6,Park7,Pde4b,Pdgfb,Pdgfc,Pdgfra,Pdgfrb,Pparg,Ppif,Ppp3ca,Prkcd…
GO:0046578	regulation of Ras protein signal transduction	2.17667	60	27.565	3.56e-06	1.97261	30	15.2083	0.0078	Abca1,Akap13,Arhgef28,Arrb1,Bcr,Csf1,Cyth1,Dennd1a,Dennd3,Dgki,Dlc1,Dnm2,Eps8l3,F2rl2,Gpr17,Igf1,Itgb1,Itpkb,Kank1,Kctd10,Kitl,Met,Ngf,Notch2,Nrg1,Nrp1,Pdgfrb,Rapgef1,Spry4,Tgfb2
GO:0042982	amyloid precursor protein metabolic process	3.16745	30	9.47135	3.96e-06	2.41573	13	5.3814	0.0293	Aatf,Abca7,Aph1b,App,Casp3,Clu,Igf1,Itm2b,Pawr,Prnp,Rock1,Sorl1,Spon1
GO:1902991	regulation of amyloid precursor protein catabolic process	3.6154	25	6.91487	4.25e-06	2.74756	9	3.27563	0.043	Abca7,App,Casp3,Clu,Igf1,Prnp,Rock1,Sorl1,Spon1
GO:0032966	negative regulation of collagen biosynthetic process	8.96439	11	1.22708	4.25e-06	5.12878	6	1.16987	0.0124	Cygb,Errfi1,Il6ra,Pparg,Rap1a,Rapgef3
GO:0007219	Notch signaling pathway	2.27298	53	23.3174	4.43e-06	2.20022	29	13.1805	0.0023	Aph1b,App,Arrb1,Ascl1,Bmp2k,Cd46,Cebpa,Dlk1,Dtx4,Foxa2,Il6st,Itgb1bp1,Kctd10,Kit,Maml2,Maml3,Mesp2,Mmp14,Neurl1a,Neurl1b,Notch2,Numb,Onecut1,Snai1,Tcim,Tgfb2,Tgfbr2,Timp4,Zmiz1
GO:0002573	myeloid leukocyte differentiation	2.115	62	29.3144	4.9e-06	1.87491	31	16.5341	0.0111	Bmp4,Car2,Cebpa,Cebpb,Cebpe,Csf1,Csf1r,Dcstamp,Dlk1,Fos,Foxp1,Gpr68,Ifi203,Il23a,Itgb6,Jun,Kit,Kitl,Myc,Nfatc1,Ninj1,Notch2,Pparg,Ppp3ca,Tcirg1,Tgfbr2,Tob2,Trib1,Ubash3b,Vegfa,Zfp36l1
GO:0001944	vasculature development	1.81945	91	50.0152	4.9e-06	2.11808	56	26.439	1.49e-05	Adamts9,Adgra2,Akt3,Angptl3,Anxa3,Aqp1,Bmp4,Btg1,Ccl2,Cd34,Dcn,Ddah1,Emp2,Errfi1,Ets1,Fbln5,Fgf1,Fkbpl,Flt1,Foxf1,Hif1a,Hipk2,Hyal1,Igf1,Il10,Immp2l,Itgb1,Jcad,Klf4,Mtdh,Ninj1,Nos3,Nrp1,Pcnt,Pdgfb,Pdgfra,Pdgfrb,Pparg,Prkd2,Ptk2b,Pxn,Rapgef3,Rock1,Sars,Sash1,Serpinf1,Smad1,Smoc2,Tafa5,Tek,Tgfb2,Tgfbr2,Thbs2,Vegfa,Wnt5a,Zc3h12a
GO:1904579	cellular response to thapsigargin	15.0328	8	0.532169	5.28e-06	9.61646	3	0.311965	0.0254	App,Clu,Dnm1l
GO:0007264	small GTPase mediated signal transduction	1.74996	99	56.5727	6e-06	1.6871	55	32.6003	0.0038	Abca1,Adrb1,Akap13,Arhgap18,Arhgap26,Arhgef28,Arrb1,Bcr,Ccdc88c,Cdc42bpa,Csf1,Cyth1,Dennd1a,Dennd3,Dgki,Dlc1,Dnm2,Dock3,Dock4,Dock5,Dok2,Ednra,Eps8l3,F2rl2,Gpr17,Hacd3,Igf1,Itgb1,Itpkb,Itsn1,Jun,Kank1,Kctd10,Kitl,Kpnb1,Met,Ngf,Notch2,Nrg1,Nrp1,Pdgfrb,Rap1a,Rapgef1,Rapgef3,Rasgef1b,Rgl1,Rgl3,Rhot1,Rock1,Rras2,Sipa1l1,Spry4,Tgfb2,Vav2,Ywhaq
GO:0010594	regulation of endothelial cell migration	2.01107	67	33.3156	7.13e-06	2.35505	36	15.2863	0.000132	Adamts9,Adgra2,Akt3,Anxa1,Anxa3,Bcar1,Bmp4,Dcn,Emp2,Ets1,Fgf1,Foxp1,Gpld1,Hdac7,Hif1a,Igf1,Itgb1bp1,Jcad,Klf4,Map2k3,Met,Nos3,Nrp1,Pdgfb,Plpp3,Pparg,Prkd2,Ptk2b,Robo4,Sash1,Serpinf1,Smoc2,Tek,Vegfa,Wnt5a,Zc3h12a
GO:0044283	small molecule biosynthetic process	1.78424	92	51.5625	7.51e-06	1.57809	64	40.5554	0.00626	Acaca,Acsm2,Acsm5,Aldh1a1,Aldh1a3,Anxa1,Asah2,Bcat1,C1qtnf3,Cbr4,Coq8a,Cry1,Decr2,Dkk3,Edn1,Elovl4,Elovl5,Ephx1,Erlin2,Fabp5,Fgf1,Haao,Hacd3,Hao1,Hif1a,Hmgcs2,Insig1,Itpkb,Kat2b,Kat2b,Lepr,Lipg,Lss,Mdh1,Mecr,Mid1ip1,Mvk,Nfkb1,Nnmt,Nr1d1,Nr3c1,P2ry6,Pah,Park7,Pgm2,Ppara,Ppargc1a,Prkab2,Prkag2,Prps1,Ptk2b,Qdpr,Scd1,Scp2,Sec14l2,Slc45a3,Snai1,Soga1,Sptlc2,Srebf1,Srr,Syk,Ubiad1,Ugdh
GO:0048771	tissue remodeling	2.20209	54	24.5222	8.66e-06	2.35196	31	13.1805	0.000488	Ahr,Bcr,Car2,Csf1r,Csk,Dcstamp,Dlk1,Ednra,Epas1,Ext1,Gja5,Hif1a,Igf1,Il23a,Lepr,Mmp14,Mmp2,Nfatc3,Nfkb1,Nos3,Notch2,Pparg,Ppp3ca,Rock1,S1pr1,Syk,Syt7,Tgfb2,Tgfbr3,Ubash3b,Vegfa
GO:0045766	positive regulation of angiogenesis	2.152	57	26.487	8.66e-06	2.42192	34	14.0384	0.000132	Akt3,Angptl3,Anxa3,Aqp1,Btg1,Cd34,Ddah1,Emp2,Ets1,Fgf1,Flt1,Hif1a,Hipk2,Hyal1,Il10,Itgb1,Jcad,Klf4,Mtdh,Ninj1,Nos3,Nrp1,Prkd2,Ptk2b,Pxn,Rapgef3,Sash1,Smad1,Smoc2,Tek,Tgfbr2,Vegfa,Wnt5a,Zc3h12a
GO:0019218	regulation of steroid metabolic process	2.47274	42	16.9852	9.97e-06	3.17712	28	8.81301	8.92e-06	Atp1a1,Cyp17a1,Dkk3,Ephx2,Erlin2,Fgf1,Fmo5,Foxa2,Igf1,Igf1r,Igfbp7,Insig1,Kcnma1,Kit,Ldlr,Lmf1,Nfkb1,Nr1d1,Nr3c1,Ppargc1a,Rora,Scd1,Scp2,Sec14l2,Snai1,Srebf1,Thrb,Ttc39b
GO:0051056	regulation of small GTPase mediated signal transduction	1.97048	68	34.5093	1.08e-05	1.92047	34	17.704	0.00626	Abca1,Akap13,Arhgap18,Arhgap26,Arhgef28,Arrb1,Bcr,Cdc42bpa,Csf1,Cyth1,Dennd1a,Dennd3,Dgki,Dlc1,Dnm2,Eps8l3,F2rl2,Gpr17,Igf1,Itgb1,Itpkb,Kank1,Kctd10,Kitl,Met,Ngf,Notch2,Nrg1,Nrp1,Pdgfrb,Rapgef1,Sipa1l1,Spry4,Tgfb2
GO:0002521	leukocyte differentiation	1.64332	116	70.589	1.17e-05	1.54045	68	44.143	0.00731	Adgrg3,Ahr,Anxa1,Bcl11a,Bmp4,Car2,Cd46,Cd8a,Cdh17,Cebpa,Cebpb,Cebpe,Csf1,Csf1r,Dcstamp,Dlk1,Dusp10,Fos,Foxp1,Gadd45g,Gm29094,Gpr68,Hdac7,Hlx,Ifi203,Ifnk,Il10,Il23a,Il9,Irf1,Itgb6,Itpkb,Jun,Kit,Kitl,Lepr,Mmp14,Myc,Nfatc1,Nfatc3,Ninj1,Notch2,Onecut1,Pax1,Plcl2,Pparg,Ppp3ca,Prex1,Ptk2b,Rora,Sash3,Sh3rf1,Smarcb1,Sox13,Srf,Syk,Tcirg1,Tgfbr2,Tob2,Trib1,Ubash3b,Vegfa,Zbtb16,Zc3h12a,Zfp36l1,Zfp36l2,Zfp60…
GO:0030323	respiratory tube development	5.30654	15	2.8267	1.35e-05	4.93152	5	1.01389	0.0278	Bmp4,Foxf1,Grhl2,Itgb6,Tgfbr2
GO:0051781	positive regulation of cell division	3.00462	29	9.65182	1.4e-05	2.24384	14	6.2393	0.0366	Cdc14a,Fgf1,Fgfr2,Garem1,Igf1r,Itgb1bp1,Lbh,Pdgfb,Pdgfc,Pkp4,Prkce,Tgfb2,Tgfb3,Vegfa
GO:0034505	tooth mineralization	4.38668	18	4.10333	1.41e-05	3.41919	8	2.33974	0.0246	Ank,Bcor,Fam20a,Fam20c,Itgb6,Nectin1,Ppara,Tcirg1
GO:0001974	blood vessel remodeling	3.13899	27	8.6015	1.5e-05	2.56439	11	4.28952	0.0346	Ahr,Bcr,Ednra,Epas1,Ext1,Igf1,Nfatc3,Nos3,Tgfb2,Tgfbr3,Vegfa
GO:0010639	negative regulation of organelle organization	1.83616	80	43.5691	1.52e-05	1.86627	54	28.9347	0.000467	Acaa2,Bmp4,Capza2,Capzb,Clasp1,Coro2b,Dcp2,Dlc1,Dmrt1,Dnm1l,Dnm2,Dync1li1,Eml4,Esr1,Fez2,Fgfr2,Gclc,Hdac6,Igf1,Inpp5k,Kank1,Kat2b,Kat2b,Lmod3,Mad1l1,Met,Mid1,Mid1ip1,Mtbp,Mul1,Nat10,Pfn2,Pparg,Ppargc1a,Ppif,Prap1,Prkcd,Rdx,S1pr1,Sec22b,Slc35f6,Specc1l,Sptan1,Sptbn1,Svil,Swap70,Tinf2,Tmem14a,Tmem67,Tom1l2,Tpm1,Trim9,Ttk,Vill
GO:0045655	regulation of monocyte differentiation	4.86912	16	3.28601	1.57e-05	5.6096	7	1.24786	0.00451	Csf1,Dcstamp,Foxp1,Gpr68,Jun,Myc,Zfp36l1
GO:1901652	response to peptide	1.84304	78	42.3215	1.61e-05	1.67729	45	26.829	0.0103	Akt3,Anxa1,App,Bcar1,C1qtnf9,Cry1,Csk,Edn1,Ednra,Gpld1,Igf1,Igf1r,Inpp5k,Insig1,Irf1,Irs1,Kank1,Kat2b,Kat2b,Khk,Mmp2,Ncoa2,Nfkb1,Nucks1,Pld1,Ppara,Pparg,Prkcd,Prkcq,Prnp,Ptprf,Pxn,Rab8b,Rock1,Serpina1a,Serpinf1,Sorbs1,Sorl1,Srsf5,Stat2,Tgfbr3,Trarg1,Vcam1,Vps13c,Zfp36l1
GO:0032868	response to insulin	2.19876	50	22.7401	1.62e-05	1.73631	26	14.9743	0.0415	Akt3,C1qtnf9,Cry1,Gpld1,Igf1r,Inpp5k,Insig1,Irs1,Kank1,Kat2b,Kat2b,Khk,Ncoa2,Nucks1,Ppara,Pparg,Prkcd,Prkcq,Ptprf,Rab8b,Sorbs1,Sorl1,Srsf5,Trarg1,Vps13c,Zfp36l1
GO:0030029	actin filament-based process	1.54533	138	89.3013	1.69e-05	1.83712	97	52.8001	1.47e-06	Ablim3,Actn1,Adrb1,Akap13,Anxa1,Aqp1,Arhgap18,Arhgap26,Arhgef5,Arpc5,Arrb1,Atp1a1,Bcar1,Bcr,Capza2,Capzb,Ccdc88c,Cdc42bpa,Cdk5r1,Clasp1,Cnn2,Cnn3,Coro1c,Coro2b,Csf1r,Cyria,Daam1,Dlc1,Dtnbp1,Edn1,Efna5,Ehbp1,Emp2,Enah,Epb41l3,Farp1,Flnb,Fmnl2,Fscn1,Gja5,Inpp5k,Iqgap2,Itgb1,Itgb1bp1,Kank1,Kit,Lmod3,Mef2a,Met,Mical2,Mkln1,Myo1h,Notch2,Nrp1,Pacsin2,Pafah1b1,Pard3,Parvb,Parvg,Pde4b,Pdgfb,Pdgfra,Pdgfrb…
GO:0048661	positive regulation of smooth muscle cell proliferation	2.40628	41	17.0387	1.9e-05	2.58792	22	8.50104	0.00179	Bmp4,Edn1,Ern1,Fgfr2,Flt1,Foxp1,Hif1a,Igf1,Igf1r,Il6ra,Jun,Mmp2,Myc,Nampt,P2ry6,Pdgfb,Pdgfrb,Ppargc1a,S1pr1,Serpinf2,Tgfbr2,Vegfa
GO:0043255	regulation of carbohydrate biosynthetic process	2.67407	33	12.3408	2.44e-05	2.32016	19	8.18908	0.0103	C1qtnf3,Cry1,Hif1a,Igf1,Inpp5k,Irs1,Kat2b,Kat2b,Lepr,Nfkb1,Nnmt,Nr3c1,P2ry6,Pdgfb,Ppara,Ppp1cb,Ptk2b,Soga1,Sorbs1
GO:1900025	negative regulation of substrate adhesion-dependent cell spreading	6.3828	12	1.88005	2.54e-05	5.91782	6	1.01389	0.00754	Bcar1,Coro1c,Efna5,Itgb1bp1,Kank1,Spry4
GO:1902003	regulation of amyloid-beta formation	3.48652	22	6.31002	2.82e-05	2.93073	8	2.72969	0.0449	Abca7,Casp3,Clu,Igf1,Prnp,Rock1,Sorl1,Spon1
GO:1903131	mononuclear cell differentiation	1.70029	95	55.8729	3.01e-05	1.60274	55	34.3161	0.00886	Adgrg3,Ahr,Anxa1,Bcl11a,Bmp4,Cd46,Cd8a,Cdh17,Cebpb,Csf1,Dcstamp,Dusp10,Foxp1,Gadd45g,Gm29094,Gpr68,Hdac7,Hlx,Ifi203,Ifnk,Il10,Il23a,Il9,Irf1,Itgb6,Itpkb,Jun,Kit,Lepr,Mmp14,Myc,Nfatc1,Nfatc3,Notch2,Onecut1,Pax1,Plcl2,Pparg,Prex1,Ptk2b,Rora,Sash3,Sh3rf1,Smarcb1,Sox13,Syk,Tcirg1,Tgfbr2,Vegfa,Zbtb16,Zc3h12a,Zfp36l1,Zfp36l2,Zfp608,Zmiz1
GO:0005977	glycogen metabolic process	2.85484	29	10.1582	3.04e-05	2.30138	14	6.08332	0.0313	Adrb1,Igf1,Il6st,Inpp5k,Irs1,Khk,Lepr,Nr1d1,Pgm2,Ppp1cb,Prkag2,Pygl,Sorbs1,Ugp2
GO:0045923	positive regulation of fatty acid metabolic process	3.59259	21	5.84537	3.04e-05	2.72808	10	3.66559	0.0337	Anxa1,Cpt1a,Elovl5,Irs1,Mid1ip1,Ppara,Pparg,Ppargc1a,Slc45a3,Srebf1
GO:0030036	actin cytoskeleton organization	1.56699	123	78.4943	3.42e-05	1.79846	85	47.2627	1.51e-05	Ablim3,Actn1,Akap13,Anxa1,Aqp1,Arhgap18,Arhgap26,Arhgef5,Arpc5,Arrb1,Bcar1,Bcr,Capza2,Capzb,Cdc42bpa,Cdk5r1,Clasp1,Cnn2,Cnn3,Coro1c,Coro2b,Csf1r,Cyria,Daam1,Dlc1,Dtnbp1,Edn1,Efna5,Ehbp1,Enah,Epb41l3,Farp1,Flnb,Fmnl2,Fscn1,Inpp5k,Iqgap2,Itgb1,Itgb1bp1,Kank1,Kit,Lmod3,Mef2a,Met,Mical2,Mkln1,Notch2,Nrp1,Pacsin2,Pafah1b1,Parvb,Parvg,Pdgfb,Pdgfra,Pdgfrb,Pdlim1,Pfn2,Pgm5,Phactr1,Prkcd,Prkce,Prkcq,Ptk2b…
GO:0051345	positive regulation of hydrolase activity	1.61844	108	66.731	4.37e-05	1.82447	72	39.4636	5.62e-05	Adrb1,Afdn,Aph1b,App,Arhgef5,Arrb1,Asap1,Asap2,Asph,Bcl10,Bcl2l11,Bcr,Bid,Calm1,Ccl2,Chn2,Cldn4,Coro1c,Cradd,Dapk1,Ddx3x,Dennd1a,Dlc1,Eif5,Esr1,Fgfr2,Flt1,Gnat1,Ifi203,Itgb1,Lmf1,Mtss2,Mul1,Myc,Ndel1,Ngf,P2rx1,Pawr,Pdgfra,Pdgfrb,Pkp4,Plxnb1,Pparg,Ppp1r15b,Prex1,Prkcd,Prkd2,Prss22,Ptk2b,Rap1a,Rapgef1,Rapgef3,Rasgef1b,Rgl1,Rgl3,Rgs16,Rgs6,Rgs8,Rock1,S100a10,S1pr1,Sipa1l1,Snx13,Srgap2,St18,Syk,Tbc1d…
GO:0030042	actin filament depolymerization	3.6332	20	5.50479	4.43e-05	2.87389	13	4.52349	0.0103	Capza2,Capzb,Lmod3,Mical2,Mical3,Rdx,Specc1l,Sptan1,Sptbn1,Svil,Swap70,Tpm1,Vill
GO:0010761	fibroblast migration	2.79125	29	10.3896	4.47e-05	2.49316	14	5.61537	0.0196	Aqp1,Arid5b,Coro1c,Cygb,Hyal2,Itgb1,Itgb1bp1,Macir,Pdgfb,Pdlim1,Prkce,Spag6,Syne2,Tns1
GO:0038066	p38MAPK cascade	2.99056	26	8.69403	4.53e-05	3.08677	13	4.21153	0.00687	Bmp4,Dusp1,Dusp10,Gadd45g,Map2k3,Mapkapk2,Met,Mfhas1,Pja2,Sash1,Vegfa,Zc3h12a,Zfp36l1
GO:0001525	angiogenesis	1.57876	116	73.4756	4.92e-05	1.93389	73	37.7478	9.3e-06	Adamts9,Adgra2,Akt3,Angptl3,Anpep,Anxa3,Aqp1,Bmp4,Btg1,Ccl2,Cd34,Clec14a,Dcn,Ddah1,Ednra,Emp2,Epas1,Ets1,Fbln5,Fgf1,Fgfr2,Fkbpl,Flt1,Hif1a,Hif3a,Hipk2,Hyal1,Il10,Itgb1,Itgb1bp1,Jcad,Jun,Kctd10,Klf4,Klf5,Lepr,Mmp2,Mtdh,Ninj1,Nos3,Nrp1,Nrp2,Otulin,Pdgfra,Pdgfrb,Pparg,Prkd2,Prok2,Ptk2b,Pxn,Rapgef3,Robo4,Rock1,Rora,S1pr1,Sars,Sash1,Serpinf1,Smad1,Smad5,Smoc2,Sox17,Syk,Tafa5,Tek,Tgfb2,Tgfbr2,Thbs2,Vav…
GO:0051248	negative regulation of protein metabolic process	1.4667	155	105.679	5.24e-05	1.36733	106	77.5233	0.0111	Aatf,Abca7,App,Aqp1,Arl6ip1,Arrb1,Bcor,Bmp4,Bod1,Camk2n1,Caprin1,Casp3,Cblb,Clu,Coro1c,Cpeb4,Crb2,Cry1,Ctdspl,Dapk1,Dcun1d3,Ddx3x,Dtnbp1,Dusp1,Dusp10,Dusp6,Edn1,Eif3h,Enc1,Errfi1,Gadd45g,Gclc,Gm29094,Grin2a,Hdac6,Hipk2,Hyal2,Ifi203,Igf1,Il10,Il9,Inpp5k,Irf1,Itgb1bp1,Itih1,Itih3,Itm2b,Jarid2,Jun,Kat2b,Kat2b,Klf4,Ldlr,Met,Mettl16,Mfhas1,Mvk,Ngf,Nrg1,Papln,Pard3,Park7,Pbk,Pcsk1n,Plpp3,Polr2d,Pparg,P…
GO:0097435	supramolecular fiber organization	1.53859	127	82.5431	5.38e-05	1.53098	88	57.4795	0.00191	Actn1,Akap13,App,Arhgap18,Arhgef5,Arpc5,Arrb1,Bcar1,Bid,Capza2,Capzb,Ccdc88c,Ckap5,Clasp1,Clu,Coro1c,Coro2b,Cyria,Dlc1,Dpysl3,Edn1,Eml4,Emp2,Enah,Ext1,Fat1,Fbln5,Fscn1,Hdac6,Hook1,Inpp5k,Iqgap2,Itgb1bp1,Jmy,Kank1,Klhl24,Kpnb1,Krt80,Ldlr,Lmod3,Lmx1b,Loxl1,Loxl4,Mef2a,Met,Mical2,Mical3,Mid1,Mid1ip1,Myo1h,Nrp1,Pafah1b1,Pakap,Pawr,Pde4dip,Pdgfra,Pdgfrb,Pdlim1,Pfn2,Pgm5,Phactr1,Prkcd,Prkce,Prkcq,Ptk2b…
GO:0007266	Rho protein signal transduction	2.34363	40	17.0676	5.6e-05	1.90326	19	9.98288	0.0459	Abca1,Adrb1,Akap13,Arhgef28,Arrb1,Bcr,Dlc1,Ednra,Eps8l3,F2rl2,Gpr17,Hacd3,Itgb1,Kank1,Kctd10,Met,Nrp1,Pdgfrb,Rock1

## Sheet: Heart enhancers up guinea pig
GO	Name	Binom Enrichment	# foreground regions	# expected regions	Binom BH p-value	Hyper Enrichment	# foreground genes	# expected genes	Hyper BH p-value	Genes
GO:0030029	actin filament-based process	1.44024	554	384.659	2.23e-14	1.56703	248	158.261	5.2e-12	Abcc9,Ablim3,Abr,Acta2,Actn1,Add3,Adgrb1,Adrb1,Akap11,Akap13,Akap6,Amotl2,Ank2,Antxr1,Ap1ar,Arap1,Arf6,Arfgef1,Arhgap18,Arhgap26,Arhgap28,Arhgap35,Arhgap6,Arhgef10l,Arhgef15,Arhgef17,Arpc1b,Arpc5,Arrb1,Atp1a1,Atxn3,Auts2,Avil,Baiap2l1,Baiap2l2,Bcar1,Bcas3,Bcr,Bmp10,Brsk2,Cacna1c,Cacna1h,Camk2d,Capza2,Capzb,Casq2,Cav1,Cavin3,Ccdc88c,Ccn2,Ccr7,Cdc42bpb,Cdc42bpg,Cdc42ep3,Cdc42ep4,Cdh1,Cdk5r1,Cfl2,Cl…
GO:0007229	integrin-mediated signaling pathway	2.27278	133	58.5185	5.38e-14	1.85801	43	23.143	0.000408	Arhgap35,Bcar1,Ccn2,Cd40lg,Cdh17,Col3a1,Dab2,Emp2,Fermt1,Fermt2,Fgr,Flna,Fut8,Fyb2,Gab2,Itga11,Itga2,Itga4,Itga9,Itgae,Itgav,Itgb6,Itgb8,Lama2,Lama5,Lamb1,Lamc1,Lims1,Lims2,Nrp1,Pcsk5,Plpp3,Ptn,Ptpn11,Ptpra,Sema7a,Slc2a10,Src,Syk,Thy1,Timp1,Vav3,Zyx
GO:0048639	positive regulation of developmental growth	1.70262	264	155.055	3.66e-13	1.63914	82	50.0263	5.06e-05	Adrb1,Afdn,Agr2,Akap6,Bbs2,Bcl11a,Bcl2,Bdnf,Bmp10,Bmpr1a,Bmpr2,Cdh4,Cdk1,Chd7,Cntf,Creb1,Cxcl12,Dbn1,Disc1,Dlg1,Drd2,Edn1,Efna5,Erbb4,Ezr,Fgf9,Fgfr1,Fxn,Gata6,Ghsr,Hlx,Igf1,Igf1r,Igf2,Itsn2,Limk1,Lpar3,Macf1,Map1b,Mapt,Mecp2,Mef2c,Mul1,Ndel1,Nedd4l,Ngf,Nr3c1,Nrg1,Nrp1,Ntrk3,Pex5,Picalm,Plcb1,Ppib,Prox1,Ptger4,Rims1,Rims2,Rpl4,Rtn4,Rufy3,Sash3,Sema4d,Sema5a,Sema7a,Sgip1,Sh3glb1,Sh3pxd2b,Smurf1,Srf…
GO:1904019	epithelial cell apoptotic process	1.97058	169	85.7614	6e-13	1.49428	51	34.1301	0.0172	Angpt1,Ano6,Apc,Arf6,Atf2,Atg7,Bcl2,Bid,Bmp4,Bmpr2,Casp3,Cast,Cd40,Cd40lg,Cdh5,Cdkn1b,Col18a1,Ednra,Esr1,Fas,Gata3,Gm28047,Hand2,Igf1,Igf1r,Il13,Il4,Itga4,Kdr,Krt8,Lef1,Lims1,Mapk8,Ngf,Pik3cg,Pla2r1,Ppargc1a,Rgcc,Sav1,Scg2,Sema5a,Spop,Srsf6,Stk3,Stk4,Tek,Tgfbr2,Tnfaip3,Trim32,Usp53,Zfp36l1
GO:0007015	actin filament organization	1.56849	343	218.682	8.01e-13	1.49572	150	100.286	3.5e-06	Acta1,Actn1,Add3,Aif1l,Ap1ar,Arap1,Arf6,Arfgef1,Arhgap18,Arhgap25,Arhgap28,Arhgap35,Arhgap6,Arhgef10l,Arhgef15,Arpc1b,Arpc5,Arrb1,Avil,Baiap2l1,Baiap2l2,Bcar1,Bcl2,Capza2,Capzb,Ccn2,Cdc42ep3,Cdc42ep4,Cfl2,Clasp1,Coro1c,Coro2b,Crhr2,Ctnna3,Cyria,Cyria,Daam2,Dbn1,Diaph3,Dlg1,Dpysl3,Efs,Emp2,Eps8,Ezr,Fat1,Fermt2,Fhdc1,Fhod3,Flna,Fscn1,Gas2l1,Ghsr,Gmfb,Gpr65,Grb2,Hax1,Hmcn1,Inpp5k,Iqgap2,Kank1,Kank2,…
GO:0048771	tissue remodeling	1.84611	195	105.627	1.69e-12	1.6706	66	39.5068	0.000211	Abi3bp,Abr,Ahr,Bcr,Bmpr2,Cartpt,Cav1,Cbs,Ccr5,Chd7,Crb1,Csf1r,Cspg4,Cyp19a1,Dcstamp,Ddr2,Dlk1,Ednra,Efna2,Enpp1,Epas1,Epha2,Erg,Ext1,F2r,Flna,Fshb,Fshr,Gja6,Hand2,Hif1a,Igf1,Igfbp5,Il20ra,Inpp4b,Inpp5d,Itga4,Itgav,Jag1,Klf6,Lepr,Lgr4,Lif,Lrp5,Mdm2,Mef2c,Mitf,Nfkb1,Pparg,Ppargc1b,Ppp3ca,Ptger4,Rassf2,Rock1,S1pr1,Spp1,Src,Syk,Tgfb2,Tgfbr3,Tie1,Timp1,Tnfrsf11b,Ubash3b,Vegfa,Wnt16
GO:0051056	regulation of small GTPase mediated signal transduction	1.68184	250	148.646	6.46e-12	1.80909	96	53.0653	4.47e-08	Abca1,Abra,Adra1a,Akap13,Arap3,Arf6,Arfgef1,Arhgap18,Arhgap24,Arhgap25,Arhgap26,Arhgap28,Arhgap35,Arhgef28,Arhgef3,Arrb1,Auts2,Bcr,Camk2d,Cbl,Cdc42se2,Cdh2,Cdon,Chn1,Col3a1,Crk,Cyth4,Dab2ip,Dennd4b,Dgki,Dgkz,Dynlt1b,Epo,Eps8,Erbb2,Erbin,F2r,F2rl2,Fbxo8,Flcn,Garnl3,Git1,Gpr65,Igf1,Iqsec1,Iqsec2,Itgav,Itpkb,Kank1,Kank2,Kitl,Lpar1,Map2k1,Map4k4,Mapkap1,Mapre2,Met,Net1,Ngf,Ngfr,Nrg1,Nrp1,P2ry10,Pdgfr…
GO:0046886	positive regulation of hormone biosynthetic process	3.75417	49	13.0522	1.04e-11	2.56665	9	3.50652	0.035	Dab2,Egr1,Hif1a,Igf1,Igf1r,Igf2,Lhcgr,Por,Ppargc1a
GO:0016049	cell growth	1.43413	446	310.991	3.57e-11	1.40337	166	118.287	4.86e-05	Adipor2,Adra1a,Adrb1,Afdn,Akap13,Akap6,App,Auts2,Bcl11a,Bcl2,Bdnf,Bmp10,Bmpr2,Cadm1,Camk2d,Ccn3,Ccr5,Cd44,Cda,Cdh4,Cdkn1a,Cdkn1b,Cgref1,Clstn1,Clstn3,Cntf,Col14a1,Crk,Csf1r,Cst10,Ctdp1,Cth,Cxcl12,Dab2,Dab2ip,Dbn1,Dcbld2,Dclk1,Dcstamp,Dcun1d3,Ddr1,Ddx3x,Disc1,Dnajb2,Edn1,Ednra,Efna5,Egfr,Ei24,Eif4g1,Emx1,Enpp1,Epb41l3,Erbb2,Ext1,Extl3,Fam122a,Fhl1,Flcn,Flrt1,Foxp1,Frzb,Fxn,Gas2l1,Gja6,H3f3a,Hpn,Ig…
GO:0001558	regulation of cell growth	1.491	369	247.484	4.47e-11	1.39888	138	98.6501	0.000325	Adipor2,Adrb1,Afdn,Akap6,Bcl11a,Bcl2,Bdnf,Bmp10,Bmpr2,Ccn3,Ccr5,Cd44,Cda,Cdh4,Cdkn1a,Cdkn1b,Cgref1,Clstn1,Clstn3,Cntf,Col14a1,Crk,Ctdp1,Cth,Cxcl12,Dab2,Dab2ip,Dbn1,Dcbld2,Dcstamp,Dcun1d3,Ddr1,Ddx3x,Disc1,Dnajb2,Edn1,Efna5,Egfr,Ei24,Eif4g1,Enpp1,Epb41l3,Erbb2,Extl3,Fam122a,Fhl1,Flcn,Foxp1,Frzb,Fxn,Gas2l1,Gja6,H3f3a,Hpn,Igf1,Igfbp5,Igfbp7,Inhba,Itsn2,Jade1,Kat7,Kif26a,Klhl22,Limk1,Lpar3,Macf1,Mag,M…
GO:0030334	regulation of cell migration	1.28454	811	631.356	4.67e-11	1.42885	325	227.456	1.31e-10	Abcc1,Abhd2,Abr,Acan,Ackr3,Acta2,Acvr1,Acvr1c,Adamts1,Adamts9,Adgrb1,Adipor2,Adora3,Afdn,Ago2,Ajuba,Akt2,Akt3,Aldoa,Amotl2,Angpt1,Ano6,Anxa3,Apc,Apod,App,Arap3,Arf6,Arhgap5,Arid2,Arsb,Bcar1,Bcas3,Bcl2,Bcr,Bmp10,Bmp2,Bmp4,Bmpr1a,Bmpr2,Brms1l,Camk2d,Capn7,Cav1,Cbll1,Ccbe1,Ccl25,Ccn3,Ccr5,Ccr7,Cd274,Cd40,Cd9,Cdh1,Cdh5,Chst2,Clasp1,Cldn4,Cmklr1,Col18a1,Col1a1,Col3a1,Coro1c,Crk,Csf1r,Cxcl12,Cyp19a1,Cy…
GO:0046885	regulation of hormone biosynthetic process	2.74705	71	25.8459	6.95e-11	2.28146	16	7.01304	0.008	Atp1a1,Bmp2,Bmp5,Dab2,Dkk3,Egr1,Hif1a,Igf1,Igf1r,Igf2,Lhcgr,Nfkb1,Nr3c1,Por,Ppargc1a,Stc2
GO:1902533	positive regulation of intracellular signal transduction	1.31166	697	531.389	7.63e-11	1.3742	310	225.586	2.97e-08	Abra,Ackr3,Acta2,Adgrv1,Adgrv1,Adora3,Adra1a,Adra1d,Adra2b,Ajuba,Akap13,Akap6,Akt3,Angpt1,Ankrd17,App,Arfgef1,Arhgap8,Arhgef3,Arrb1,Auts2,Bank1,Bcar3,Bcl2l11,Bid,Bmp2,Bmp4,Bub1,Camk2d,Cartpt,Cav1,Cavin3,Cbl,Ccl25,Ccn2,Ccnq,Ccr5,Ccr7,Cd3e,Cd40,Cd44,Cd84,Cd8a,Cdh2,Cdon,Chrna7,Clec16a,Cntf,Col3a1,Cracr2a,Crebbp,Crhr2,Crk,Csf1r,Cspg4,Cth,Cxcl12,Dab2,Dab2ip,Dcc,Dcn,Ddr2,Ddx3x,Denn2b,Dgki,Dhx15,Dhx36,D…
GO:0032350	regulation of hormone metabolic process	2.35619	94	39.8949	7.97e-11	1.87151	21	11.2209	0.0226	Atp1a1,Bmp2,Bmp5,Dab2,Dkk3,Egr1,Fshr,Gata3,Hif1a,Hpn,Igf1,Igf1r,Igf2,Kcnma1,Lhcgr,Nfkb1,Nr3c1,Por,Ppargc1a,Rdh16f2,Stc2
GO:0003013	circulatory system process	1.45021	407	280.649	8.01e-11	1.66051	151	90.9357	2.13e-09	Abcc1,Abcc2,Abcc9,Abcg2,Abr,Acta2,Add3,Adora2a,Adra1a,Adra1d,Adra2b,Adrb1,Ahr,Akap6,Alox5,Angpt1,Ank2,Apln,App,Arhgap35,Atp1a1,Atp1b1,Atp2a2,Bbs2,Bcr,Bmp10,Bmpr2,Bves,Cacna1c,Cacna1e,Cacna1g,Cacna1h,Cacna2d1,Calm1,Calm2,Casq2,Cav1,Cbs,Ccn2,Cdh5,Cftr,Chd7,Chrm2,Chrna7,Crhr2,Crp,Ctnna3,Cysltr1,Dlg1,Dnm1l,Dock4,Dock5,Drd2,Edn1,Ednra,Epas1,Esr2,Ext1,F2r,Fabp5,Fermt2,Fli1,Fyn,Gaa,Gata6,Gch1,Gclm,Gja6,…
GO:0045927	positive regulation of growth	1.54215	307	199.073	1e-10	1.51881	109	71.7668	6.57e-05	Adrb1,Afdn,Agr2,Ahi1,Ahr,Akap6,Bbs2,Bcl11a,Bcl2,Bdnf,Bmp10,Bmpr1a,Bmpr2,Cdh4,Cdk1,Chd7,Cntf,Creb1,Crk,Cxcl12,Dbn1,Ddx3x,Disc1,Dlg1,Drd2,Edn1,Efna5,Egfr,Eif4g1,Erbb2,Erbb4,Extl3,Ezr,Fam122a,Fgf9,Fgfr1,Fxn,Gata6,Ghsr,H3f3a,Hlx,Hpn,Igf1,Igf1r,Igf2,Itsn2,Klhl22,Limk1,Lpar3,Macf1,Map1b,Mapkap1,Mapt,Mecp2,Mef2c,Mtpn,Mul1,N6amt1,Ndel1,Nedd4l,Ngf,Nr3c1,Nrg1,Nrp1,Ntrk3,Pex5,Picalm,Plcb1,Ppib,Prox1,Prr5,Ps…
GO:0097435	supramolecular fiber organization	1.3894	494	355.549	1.11e-10	1.31176	226	172.287	0.000133	Acan,Acta1,Actn1,Add3,Aif1l,Akap13,Ap1ar,Apc,App,Arap1,Arf6,Arfgef1,Arhgap18,Arhgap25,Arhgap28,Arhgap35,Arhgap6,Arhgef10l,Arhgef15,Arpc1b,Arpc5,Arrb1,Avil,B2m,Baiap2l1,Baiap2l2,Bcar1,Bcl2,Bid,Bmp10,Camsap1,Capza2,Capzb,Cav1,Ccdc88c,Ccn2,Ccsap,Cdc42ep3,Cdc42ep4,Cdh5,Cdkn1b,Cfl2,Chrna7,Clasp1,Col14a1,Col1a1,Col1a2,Col3a1,Col5a1,Col5a2,Coro1c,Coro2b,Crhr2,Ctnna3,Cyp1b1,Cyria,Cyria,Daam2,Dbn1,Ddr2,Di…
GO:0150115	cell-substrate junction organization	2.07341	121	58.3579	1.31e-10	1.78586	43	24.0781	0.000986	Actn1,Ajuba,Apod,Arf6,Arhgap6,Bcas3,Bcl2,Bcr,Clasp1,Coro1c,Coro2b,Dst,Efna5,Enpp2,Fermt2,Iqsec1,Itga2,Itgav,Kdr,Lamc1,Lims1,Macf1,Map4k4,Mapre2,Nrp1,Pik3r1,Pten,Ptpn11,Ptpra,Ptprj,Ptprk,Rab8b,Rhod,Rock1,Smad3,Src,Tek,Thy1,Tns1,Tsc1,Vcl,Vegfa,Whamm
GO:1901214	regulation of neuron death	1.4889	351	235.744	1.37e-10	1.28654	120	93.2734	0.0183	Abcc1,Adora2a,Amigo2,Angpt1,App,Arrb1,Atf2,Atg7,Barhl1,Bcl2,Bcl2l11,Bdnf,Casp3,Cbl,Ccnd1,Cd34,Cdk5r1,Chrna7,Clcf1,Cln8,Cntf,Cntfr,Cpeb4,Creb1,Dcc,Ddit4,Ddr2,Dkk1,Dtnbp1,Egln3,Egr1,Ephb1,Epo,Esr1,Esr2,F2r,Fas,Fbxw7,Fcgr3,Fyn,Fzd1,Fzd9,Gabra5,Gabrb3,Gata3,Gclm,Glp1r,Grik5,Grin1,Hif1a,Hipk2,Hsph1,Ifng,Igf1,Il13,Il6st,Inpp5a,Isl1,Itpr1,Itsn1,Jun,Kcnma1,Kdr,Kmo,Lrrk2,Mag,Map3k11,Mapk8,Mapt,Mcl1,Mecp2,…
GO:0007264	small GTPase mediated signal transduction	1.47733	360	243.683	1.5e-10	1.62718	159	97.715	3.56e-09	Abca1,Abra,Adra1a,Adrb1,Akap13,Arap3,Arf6,Arfgef1,Arhgap18,Arhgap24,Arhgap25,Arhgap26,Arhgap28,Arhgap32,Arhgap35,Arhgap8,Arhgef12,Arhgef28,Arhgef3,Arl3,Arrb1,Auts2,Bcar3,Bcr,Camk2d,Cbl,Ccdc88c,Cdc42ep3,Cdc42ep4,Cdc42se2,Cdh2,Cdon,Chn1,Col1a2,Col3a1,Crk,Ctnnal1,Cyth4,Dab1,Dab2ip,Dennd4b,Dgki,Dgkz,Dock10,Dock4,Dock5,Dock7,Dock9,Dynlt1b,Ednra,Epo,Eps8,Erbb2,Erbin,F2r,F2rl2,Fbxo8,Flcn,Garnl3,Git1,Gm4…
GO:0030036	actin cytoskeleton organization	1.396	472	338.108	1.81e-10	1.54592	219	141.663	2.86e-10	Ablim3,Abr,Actn1,Add3,Adgrb1,Akap11,Akap13,Amotl2,Antxr1,Ap1ar,Arap1,Arf6,Arfgef1,Arhgap18,Arhgap26,Arhgap28,Arhgap35,Arhgap6,Arhgef10l,Arhgef15,Arhgef17,Arpc1b,Arpc5,Arrb1,Atxn3,Auts2,Avil,Baiap2l1,Baiap2l2,Bcar1,Bcas3,Bcr,Bmp10,Brsk2,Capza2,Capzb,Casq2,Cavin3,Ccn2,Ccr7,Cdc42bpb,Cdc42bpg,Cdc42ep3,Cdc42ep4,Cdh1,Cdk5r1,Cfl2,Clasp1,Cnn3,Coro1c,Coro2b,Crk,Csf1r,Cttnbp2,Cyria,Cyria,Daam1,Daam2,Dbn1,D…
GO:0040017	positive regulation of locomotion	1.36478	529	387.607	1.9e-10	1.41899	205	144.469	1.62e-06	Abcc1,Ackr3,Acta2,Acvr1,Adamts1,Adora3,Ago2,Akt2,Akt3,Aldoa,Angpt1,Ano6,Anxa3,Apc,App,Arf6,Arhgap5,Artn,Bcar1,Bcas3,Bcl2,Bmp2,Bmp4,Bmpr2,Bves,Camk2d,Capn7,Cav1,Cbll1,Ccbe1,Ccr4,Ccr5,Ccr7,Cd274,Cd40,Cdh5,Clasp1,Cldn4,Cmklr1,Col18a1,Col1a1,Crk,Csf1r,Cxcl12,Cyp1b1,Dab2,Dab2ip,Ddr2,Dnm1l,Dock4,Dock5,Dock7,Edn1,Ednra,Egfr,Egr1,Enpp2,Epha2,Erbb4,Ets1,F2r,F3,Fbln1,Fermt1,Fermt2,Fgf1,Fgf18,Fgf9,Fgfr1,Fgr…
GO:0051272	positive regulation of cellular component movement	1.3704	516	376.533	2.01e-10	1.40265	201	143.3	5.1e-06	Abcc1,Ackr3,Acta2,Acvr1,Adamts1,Adora3,Ago2,Akt2,Akt3,Aldoa,Angpt1,Ano6,Anxa3,Apc,App,Arf6,Arhgap5,Bcar1,Bcas3,Bcl2,Bmp2,Bmp4,Bmpr2,Borcs5,Cacna1h,Camk2d,Capn7,Cav1,Cbll1,Ccbe1,Ccr5,Ccr7,Cd274,Cd40,Cdh5,Clasp1,Cldn4,Cmklr1,Col18a1,Col1a1,Crk,Csf1r,Cxcl12,Cyp1b1,Dab2,Dab2ip,Ddr2,Dnm1l,Dock4,Dock5,Dock7,Edn1,Ednra,Egfr,Egr1,Enpp2,Epha2,Erbb4,Ets1,F2r,F3,Fbln1,Fermt1,Fermt2,Fez1,Fgf1,Fgf18,Fgf9,Fgfr…
GO:0045773	positive regulation of axon extension	2.43811	80	32.8123	4.25e-10	1.96776	23	11.6884	0.008	Bmpr2,Cdh4,Cntf,Cxcl12,Dbn1,Disc1,Fxn,Limk1,Macf1,Map1b,Mapt,Ndel1,Ngf,Nrp1,Ntrk3,Rpl4,Rufy3,Sema5a,Sema7a,Srf,Trpv2,Vegfa,Zfyve27
GO:0032970	regulation of actin filament-based process	1.492	329	220.509	4.73e-10	1.5356	140	91.1695	1.79e-06	Acta2,Add3,Adrb1,Akap13,Akap6,Ank2,Ap1ar,Arap1,Arf6,Arfgef1,Arhgap18,Arhgap28,Arhgap35,Arhgap6,Arhgef10l,Arhgef15,Arpc1b,Arpc5,Atp1a1,Avil,Baiap2l1,Baiap2l2,Bcas3,Bmp10,Cacna1c,Cacna1h,Capza2,Capzb,Casq2,Cav1,Ccn2,Cdc42ep3,Cdc42ep4,Cdk5r1,Cfl2,Clasp1,Coro2b,Crk,Csf1r,Ctnna3,Cyria,Cyria,Daam2,Dbn1,Dlg1,Edn1,Efna5,Eps8,Fermt2,Fgr,Fhod3,Flna,Frmd6,Fscn1,Gm13306,Gmfb,Gpr65,Grb2,Hax1,Hck,Inpp5k,Iqgap2…
GO:0036293	response to decreased oxygen levels	1.6912	202	119.442	4.73e-10	1.36963	73	53.2991	0.0256	Acaa2,Ado,Ajuba,Aqp3,Arnt2,Atp1b1,Bcl2,Bmp2,Camk2d,Cav1,Cbs,Cd34,Chrna4,Cpeb4,Cr1l,Ddit4,Drd2,Edn1,Ednra,Egln3,Egr1,Eng,Epas1,Epo,Fabp1,Flt1,Fndc1,Fosl2,Gata6,Hif1a,Itpr1,Itpr2,Kcnd2,Kcnma1,Kdr,Map2k1,Mb,Mecp2,Myc,Nkx3-1,Npepps,Oprd1,P4hb,Pparg,Prkce,Pten,Ptgis,Pygm,Raf1,Rgcc,Rora,Rtn4,Scap,Slc2a4,Slc2a8,Slc8a3,Slc9a1,Smad3,Sod3,Tbl2,Tek,Tgfb2,Tgfb3,Tigar,Tm9sf4,Tsc1,Ubqln1,Ucp3,Vegfa,Vegfc,Vegfd…
GO:0000165	MAPK cascade	1.31212	639	486.997	4.75e-10	1.463	263	179.768	1.06e-09	Ackr3,Acta2,Adra1a,Adra1d,Adra2b,Aida,Ajuba,Akap13,Angpt1,Apc,App,Araf,Arhgap8,Arrb1,Atf2,Atf3,Bank1,Bcar3,Bmp2,Bmp4,Bmp8b,Camk2d,Cartpt,Cav1,Cavin3,Ccl25,Ccn2,Ccnq,Ccr5,Ccr7,Cd40,Cd44,Cd84,Cdh2,Cdon,Chrna7,Clcf1,Cntf,Cracr2a,Crhr2,Crk,Csf1r,Cspg4,Cxcl12,Dab2,Dab2ip,Dact1,Dag1,Dcc,Ddr2,Denn2b,Dkk1,Dlg1,Dnaja1,Dnajc27,Dok5,Drd2,Dusp1,Dusp10,Dusp16,Dusp19,Dusp27,Dusp4,Dusp6,Dynlt1b,E130311K13Rik,Ed…
GO:0030307	positive regulation of cell growth	1.70021	198	116.456	4.75e-10	1.60415	72	44.8835	0.00037	Adrb1,Afdn,Akap6,Bcl11a,Bcl2,Bdnf,Bmpr2,Cdh4,Cntf,Crk,Cxcl12,Dbn1,Ddx3x,Disc1,Edn1,Efna5,Egfr,Eif4g1,Erbb2,Extl3,Fam122a,Fxn,H3f3a,Hpn,Igf1,Itsn2,Klhl22,Limk1,Lpar3,Macf1,Map1b,Mapkap1,Mapt,Mecp2,Mtpn,Mul1,N6amt1,Ndel1,Nedd4l,Ngf,Nr3c1,Nrg1,Nrp1,Ntrk3,Picalm,Prr5,Psmd10,Rims1,Rims2,Rpl4,Rtn4,Rufy3,Sdcbp,Sema4d,Sema5a,Sema7a,Sfrp2,Sgk1,Sh3glb1,Slc25a33,Slc9a1,Smurf1,Sphk1,Srf,Syt1,Syt17,Tgfb2,Trim…
GO:0038066	p38MAPK cascade	2.32316	87	37.4489	5.19e-10	2.13887	27	12.6235	0.000754	Atf2,Bmp2,Bmp4,Ccr5,Dab2ip,Dlg1,Dusp1,Dusp10,Ezr,Gadd45g,Gm28047,Hand2,Hgf,Hsph1,Map3k3,Mapkapk2,Met,Mfhas1,Mink1,Phlpp1,Pja2,Sash1,Sphk1,Stk39,Vegfa,Zc3h12a,Zfp36l1
GO:0030335	positive regulation of cell migration	1.36568	501	366.851	5.58e-10	1.42837	194	135.819	2.14e-06	Abcc1,Ackr3,Acta2,Acvr1,Adamts1,Adora3,Ago2,Akt2,Akt3,Aldoa,Angpt1,Ano6,Anxa3,Apc,App,Arf6,Arhgap5,Bcar1,Bcas3,Bcl2,Bmp2,Bmp4,Bmpr2,Camk2d,Capn7,Cav1,Cbll1,Ccbe1,Ccr5,Ccr7,Cd274,Cd40,Cdh5,Clasp1,Cldn4,Cmklr1,Col18a1,Col1a1,Crk,Csf1r,Cxcl12,Cyp1b1,Dab2,Dab2ip,Ddr2,Dnm1l,Dock4,Dock5,Dock7,Edn1,Ednra,Egfr,Egr1,Enpp2,Epha2,Erbb4,Ets1,F2r,F3,Fbln1,Fermt1,Fermt2,Fgf1,Fgf18,Fgf9,Fgfr1,Fgr,Flna,Flt1,Foxp…
GO:0031032	actomyosin structure organization	1.7042	193	113.25	6.2e-10	1.59124	77	48.39	0.000276	Akap13,Arap1,Arhgap28,Arhgap6,Arhgef10l,Arhgef15,Arrb1,Bmp10,Casq2,Ccn2,Cdc42bpb,Cdc42bpg,Cfl2,Clasp1,Cnn3,Coro2b,Edn1,Epb41,Epb41l3,Epb41l4a,Fermt2,Fhdc1,Fhod3,Frmd3,Frmd5,Frmd6,Gpr65,Inpp5k,Kank2,Kank3,Kank4,Krt8,Limk1,Lmod3,Lpar1,Lurap1,Mef2a,Mef2c,Met,Myh10,Myh9,Myo18a,Myom2,Myoz2,Mypn,Neb,Nrp1,Pdgfrb,Pfn2,Pgm5,Phactr1,Pik3r1,Pik3r2,Ppp1r9a,Prkcq,Prox1,Ptger4,Rgcc,Rock1,S1pr1,Sh3pxd2b,Smad3,S…
GO:2000147	positive regulation of cell motility	1.36033	507	372.702	7.46e-10	1.40219	197	140.495	6.71e-06	Abcc1,Ackr3,Acta2,Acvr1,Adamts1,Adora3,Ago2,Akt2,Akt3,Aldoa,Angpt1,Ano6,Anxa3,Apc,App,Arf6,Arhgap5,Bcar1,Bcas3,Bcl2,Bmp2,Bmp4,Bmpr2,Camk2d,Capn7,Cav1,Cbll1,Ccbe1,Ccr5,Ccr7,Cd274,Cd40,Cdh5,Clasp1,Cldn4,Cmklr1,Col18a1,Col1a1,Crk,Csf1r,Cxcl12,Cyp1b1,Dab2,Dab2ip,Ddr2,Dnm1l,Dock4,Dock5,Dock7,Edn1,Ednra,Egfr,Egr1,Enpp2,Epha2,Erbb4,Ets1,F2r,F3,Fbln1,Fermt1,Fermt2,Fgf1,Fgf18,Fgf9,Fgfr1,Fgr,Flna,Flt1,Foxp…
GO:0070997	neuron death	1.44456	371	256.826	7.83e-10	1.26388	130	102.858	0.0229	Abcc1,Adora2a,Akt2,Amigo2,Angpt1,App,Arrb1,Atf2,Atg7,Barhl1,Bcl2,Bcl2l11,Bdnf,Casp3,Casp7,Cbl,Ccnd1,Ccr5,Cd34,Cdk5r1,Chrna7,Clcf1,Cln8,Cntf,Cntfr,Cpeb4,Creb1,Dcc,Ddit4,Ddr2,Dkk1,Dpysl4,Dtnbp1,Egln3,Egr1,Enpp1,Ephb1,Epo,Esr1,Esr2,F2r,Fas,Fbxw7,Fcgr3,Fyn,Fzd1,Fzd9,Gabra5,Gabrb3,Gata3,Gclm,Glp1r,Grik5,Grin1,Hif1a,Hipk2,Hsph1,Ifng,Igf1,Il13,Il6st,Inpp5a,Isl1,Itpr1,Itsn1,Jun,Kcnma1,Kdr,Kmo,Lrrk2,Mag,M…
GO:0003018	vascular process in circulatory system	1.62201	228	140.566	7.83e-10	1.56851	77	49.0913	0.000431	Abcc1,Abcc2,Abcg2,Abr,Acta2,Add3,Adora2a,Adra1a,Adra1d,Adra2b,Adrb1,Ahr,Alox5,Angpt1,Apln,Arhgap35,Bbs2,Bcr,Bmpr2,Cacna1c,Cacna1g,Cav1,Cbs,Cdh5,Cftr,Crp,Cysltr1,Dock4,Dock5,Edn1,Ednra,Esr2,Ext1,F2r,Fabp5,Fermt2,Gch1,Gclm,Gja6,Gm45837,Hif1a,Hrh2,Htr1a,Htr2a,Htr2c,Kcnma1,Kdr,Map2k1,Mgll,Npr3,Nr3c1,P2rx1,P2ry2,Pde3a,Pde5a,Pla2g6,Ptger3,Ptgs1,Ptp4a3,Ptprj,Ptprm,Rock1,Sh3gl2,Slc22a2,Slc5a6,Slit2,Smad6…
GO:0010632	regulation of epithelial cell migration	1.51918	294	193.526	7.83e-10	1.59399	98	61.481	2.38e-05	Adamts9,Adgrb1,Akt3,Angpt1,Anxa3,Apc,Arf6,Arhgap5,Arsb,Bcar1,Bcas3,Bmp10,Bmp4,Bmpr2,Capn7,Ccbe1,Cd40,Clasp1,Col18a1,Coro1c,Dab2ip,Dcn,Dock5,Dusp10,Emp2,Enpp2,Epha2,Ets1,Fbxw7,Fgf1,Fgf18,Fgfr1,Foxp1,Gab2,Gata3,Glul,Has2,Hdac9,Hif1a,Ifng,Igf1,Igf2,Il4,Iqsec1,Irs1,Itga2,Jcad,Jun,Kdr,Klf4,Macf1,Macir,Map3k3,Map4k4,Mapre2,Mecp2,Mef2c,Meox2,Met,Nr2f2,Nrp1,Nus1,Pfn2,Pik3cd,Pik3cg,Pik3r2,Plk2,Plpp3,Pparg…
GO:0010631	epithelial cell migration	1.4589	349	239.222	9.45e-10	1.57669	122	77.3772	2.58e-06	Adamts9,Adgrb1,Akt3,Angpt1,Anxa3,Apc,Arf6,Arhgap5,Arsb,Bcar1,Bcas3,Bmp10,Bmp4,Bmpr2,Capn7,Ccbe1,Ccn3,Cd40,Cdh5,Clasp1,Clec14a,Col18a1,Coro1c,Cxcl12,Cyp1b1,Daam2,Dab2ip,Dcn,Dock5,Dusp10,Emp2,Enpp2,Epha2,Ets1,Fbxw7,Fermt1,Fgf1,Fgf18,Fgfr1,Foxp1,Fstl1,Gab2,Gata3,Glul,Has2,Hdac9,Hif1a,Ifng,Igf1,Igf2,Il4,Iqsec1,Irs1,Itga2,Itgav,Jcad,Jun,Kank1,Kank2,Kdr,Kit,Kitl,Klf4,Lpxn,Macf1,Macir,Map3k3,Map4k4,Mapr…
GO:0010594	regulation of endothelial cell migration	1.6097	231	143.505	9.45e-10	1.41864	65	45.8185	0.0184	Adamts9,Adgrb1,Akt3,Angpt1,Anxa3,Bcar1,Bcas3,Bmp10,Bmp4,Bmpr2,Ccbe1,Cd40,Col18a1,Dab2ip,Dcn,Emp2,Epha2,Ets1,Fbxw7,Fgf1,Fgf18,Fgfr1,Foxp1,Gata3,Glul,Hdac9,Hif1a,Igf1,Igf2,Jcad,Kdr,Klf4,Map3k3,Mecp2,Mef2c,Meox2,Met,Nr2f2,Nrp1,Nus1,Pik3cd,Pik3cg,Pik3r2,Plk2,Plpp3,Pparg,Prkd1,Prkd2,Prox1,Ptprm,Rgcc,Rhoj,Rin2,Sash1,Sema5a,Shh,Slit2,Sparc,Stc1,Tek,Vash1,Vegfa,Vegfc,Wnt5a,Zc3h12a
GO:0046578	regulation of Ras protein signal transduction	1.67601	199	118.734	1.13e-09	1.75497	80	45.5848	3.86e-06	Abca1,Abra,Adra1a,Akap13,Arap3,Arf6,Arfgef1,Arhgap24,Arhgap35,Arhgef28,Arhgef3,Arrb1,Auts2,Bcr,Camk2d,Cbl,Cdc42se2,Cdh2,Col3a1,Crk,Cyth4,Dab2ip,Dennd4b,Dgki,Dgkz,Dynlt1b,Epo,Eps8,Erbb2,Erbin,F2r,F2rl2,Fbxo8,Flcn,Git1,Gpr65,Igf1,Iqsec1,Iqsec2,Itpkb,Kank1,Kank2,Kitl,Lpar1,Map2k1,Map4k4,Mapkap1,Mapre2,Met,Net1,Ngf,Ngfr,Nrg1,Nrp1,P2ry10,Pdgfrb,Pik3cg,Prag1,Psd3,Ralgps1,Ralgps2,Rapgef1,Rasa2,Rasa4,Ras…
GO:0007044	cell-substrate junction assembly	2.06923	107	51.7099	1.28e-09	1.67582	38	22.6755	0.00798	Actn1,Ajuba,Apod,Arhgap6,Bcas3,Bcl2,Bcr,Clasp1,Coro1c,Coro2b,Dst,Efna5,Enpp2,Fermt2,Itga2,Itgav,Kdr,Lamc1,Lims1,Macf1,Map4k4,Nrp1,Pten,Ptpn11,Ptpra,Ptprj,Ptprk,Rhod,Rock1,Smad3,Src,Tek,Thy1,Tns1,Tsc1,Vcl,Vegfa,Whamm
GO:0002692	negative regulation of cellular extravasation	4.57354	31	6.77812	1.28e-09	3.20831	6	1.87014	0.0385	Abr,Bcr,Ccl25,Cxcl12,Plcb1,Ptger4
GO:0001666	response to hypoxia	1.67553	196	116.978	1.41e-09	1.46725	71	48.39	0.00568	Acaa2,Ado,Ajuba,Aqp3,Arnt2,Atp1b1,Bcl2,Bmp2,Camk2d,Cav1,Cbs,Cd34,Chrna4,Cr1l,Ddit4,Drd2,Edn1,Ednra,Egln3,Egr1,Eng,Epas1,Epo,Fabp1,Flt1,Fndc1,Fosl2,Gata6,Hif1a,Itpr1,Itpr2,Kcnd2,Kcnma1,Kdr,Map2k1,Mb,Mecp2,Myc,Nkx3-1,Npepps,Oprd1,P4hb,Pparg,Prkce,Pten,Ptgis,Pygm,Raf1,Rgcc,Rora,Rtn4,Scap,Slc2a4,Slc2a8,Slc8a3,Slc9a1,Smad3,Sod3,Tbl2,Tek,Tgfb2,Tgfb3,Tigar,Tm9sf4,Ubqln1,Ucp3,Vegfa,Vegfc,Vegfd,Vldlr,Zfp3…
GO:0043410	positive regulation of MAPK cascade	1.37272	457	332.915	1.96e-09	1.51029	179	118.52	1.04e-07	Ackr3,Acta2,Adra1a,Adra1d,Adra2b,Ajuba,Akap13,Angpt1,App,Arhgap8,Arrb1,Bank1,Bcar3,Bmp2,Bmp4,Camk2d,Cartpt,Cavin3,Ccl25,Ccn2,Ccnq,Ccr5,Ccr7,Cd40,Cd44,Cd84,Cdh2,Cdon,Chrna7,Cntf,Cracr2a,Crhr2,Crk,Csf1r,Cspg4,Cxcl12,Dab2,Dab2ip,Dcc,Ddr2,Denn2b,Dkk1,Dnajc27,Dok5,Drd2,Dusp19,Edn1,Ednra,Egfr,Epo,Erbb2,Erbb4,Ern1,Esr1,Esr2,F2r,Fbxw7,Fcgr3,Fermt2,Fgd4,Fgf1,Fgf18,Fgf23,Fgf9,Fgfr1,Fgfr4,Flt1,Fshr,Gab1,Gad…
GO:0001974	blood vessel remodeling	2.26719	84	37.0503	3.04e-09	1.78888	23	12.8572	0.027	Abr,Ahr,Bcr,Bmpr2,Cbs,Ccr5,Chd7,Crb1,Ednra,Epas1,Erg,Ext1,Flna,Gja6,Igf1,Itga4,Jag1,Lif,Mdm2,Mef2c,Tgfb2,Tgfbr3,Vegfa
GO:0030048	actin filament-based movement	1.96223	118	60.1357	3.35e-09	1.82032	40	21.9742	0.00108	Abcc9,Acta2,Adrb1,Akap6,Ank2,Atp1a1,Cacna1c,Cacna1h,Camk2d,Casq2,Cav1,Ccdc88c,Ctnna3,Dbn1,Dlg1,Emp2,Fnbp1l,Frmd6,Kcnj2,Myh10,Myh9,Myo1b,Myo1e,Myo1f,Pard3,Parva,Pde4b,Pln,Ptger3,Rock1,Sgcd,Stc1,Sumo1,Sun2,Syne2,Tpm1,Wasf2,Wipf1,Wipf2,Wipf3
GO:0032352	positive regulation of hormone metabolic process	2.88853	53	18.3485	3.35e-09	2.33332	12	5.1429	0.0238	Dab2,Egr1,Gata3,Hif1a,Hpn,Igf1,Igf1r,Igf2,Lhcgr,Por,Ppargc1a,Rdh16f2
GO:0061842	microtubule organizing center localization	2.77943	56	20.148	3.87e-09	2.20369	17	7.71434	0.0087	Arpc5,Bicd2,Ccdc141,Dlg1,Dync1li2,Ezr,Nde1,Ndel1,Nin,Pard3,Pard3b,Plxna2,Sema6a,Sun1,Sun2,Syne2,Tmem201
GO:0016311	dephosphorylation	1.50722	278	184.446	5.38e-09	1.51366	115	75.9746	4.57e-05	Acp2,Ahr,Akap1,Akp3,Bcl2,Bmp2,Bod1,Bpnt2,Btrc,Calm1,Calm2,Cdc14a,Cdca2,Cdh5,Ctdp1,Ctdsp2,Drd2,Dusp1,Dusp10,Dusp16,Dusp18,Dusp19,Dusp23,Dusp27,Dusp4,Dusp6,Eya1,Eya2,Eya4,G6pc,Hpn,Ifng,Inpp1,Inpp4b,Inpp5a,Inpp5d,Inpp5k,Itga2,Lpin1,Mef2c,Mfhas1,Mgat5,Mprip,Mtmr10,Mtmr2,Mtmr4,Nck1,Npnt,Nt5c,Nuak1,Ocrl,Pawr,Pdgfrb,Pdp2,Phlpp1,Phpt1,Plpp3,Plpp5,Plppr2,Plppr5,Ppargc1b,Ppm1h,Ppm1l,Ppp1ca,Ppp1r12a,Ppp1r15…
GO:0071456	cellular response to hypoxia	2.02348	105	51.8909	7.28e-09	1.64871	37	22.4417	0.0118	Acaa2,Ado,Ajuba,Aqp3,Bcl2,Cbs,Cd34,Cr1l,Egln3,Epas1,Fabp1,Fndc1,Gata6,Hif1a,Kcnd2,Map2k1,Myc,Nkx3-1,Npepps,Oprd1,P4hb,Pparg,Prkce,Pten,Ptgis,Rgcc,Rora,Rtn4,Slc2a4,Slc8a3,Slc9a1,Tbl2,Tigar,Ubqln1,Vegfa,Vldlr,Zfp36l1
GO:0040008	regulation of growth	1.31265	559	425.855	7.94e-09	1.31814	212	160.832	0.000179	Adipor2,Adrb1,Afdn,Agr2,Ahi1,Ahr,Akap6,Apc,App,Atxn2,Bbs2,Bcl11a,Bcl2,Bcl2l11,Bdnf,Bmp10,Bmp4,Bmpr1a,Bmpr2,Brms1l,Cacna1c,Ccn3,Ccnb2,Ccr5,Cd44,Cda,Cdh4,Cdk1,Cdkn1a,Cdkn1b,Cgref1,Chd7,Cish,Clstn1,Clstn3,Cntf,Col14a1,Creb1,Crk,Ctdp1,Cth,Cxcl12,Dab2,Dab2ip,Dbn1,Dcaf1,Dcbld2,Dcstamp,Dcun1d3,Ddr1,Ddx3x,Disc1,Dlg1,Dmap1,Dnajb2,Drd2,Dusp10,Dusp6,Edn1,Efna5,Egfr,Ei24,Eif4g1,Enpp1,Epb41l3,Erbb2,Erbb4,Extl…
GO:0030308	negative regulation of cell growth	1.67358	182	108.749	8.06e-09	1.45675	63	43.2471	0.0116	Adipor2,Bcl11a,Bcl2,Bmp10,Bmpr2,Ccn3,Ccr5,Cda,Cdkn1a,Cdkn1b,Cgref1,Ctdp1,Cth,Dab2,Dab2ip,Dcbld2,Dcstamp,Dcun1d3,Ddx3x,Dnajb2,Ei24,Enpp1,Fhl1,Flcn,Foxp1,Frzb,Gas2l1,Gja6,Inhba,Mag,Mecp2,Mul1,Nrp1,Osgin2,Pparg,Psrc1,Ptprj,Ptprs,Rgma,Rgs4,Rtn4,Ryk,Sema4d,Sema5a,Sema6a,Sema7a,Serpine2,Sesn2,Sfrp2,Sh3bp4,Slit1,Slit2,Slit3,Smad3,Smarca2,Sox17,Tgfb2,Tnr,Tro,Vgll4,Wnt5a,Wt1,Zc3h12d
GO:0150117	positive regulation of cell-substrate junction organization	2.65748	58	21.8252	8.65e-09	2.26469	18	7.94811	0.00468	Arf6,Enpp2,Fermt2,Iqsec1,Kdr,Lims1,Map4k4,Mapre2,Nrp1,Pik3r1,Ptpn11,Ptprj,Rock1,Smad3,Tek,Thy1,Tsc1,Vegfa
GO:0110053	regulation of actin filament organization	1.59683	213	133.389	1.06e-08	1.47508	90	61.0134	0.00104	Add3,Ap1ar,Arap1,Arf6,Arfgef1,Arhgap18,Arhgap28,Arhgap35,Arhgap6,Arhgef10l,Arhgef15,Arpc1b,Arpc5,Avil,Baiap2l1,Baiap2l2,Capza2,Capzb,Ccn2,Cdc42ep3,Cdc42ep4,Cfl2,Clasp1,Coro2b,Cyria,Cyria,Daam2,Dbn1,Dlg1,Eps8,Fermt2,Fhod3,Flna,Gmfb,Gpr65,Grb2,Hax1,Inpp5k,Kank1,Kank2,Kank3,Kank4,Lima1,Limk1,Lmod3,Lpar1,Magel2,Map3k1,Met,Mtpn,Mtss1,Nck1,Nck2,Nrp1,Pecam1,Pfn2,Pik3r1,Pik3r2,Plekhh2,Ppp1r9a,Prkce,Prkcq…
GO:0050918	positive chemotaxis	2.25799	79	34.9869	1.26e-08	1.87151	21	11.2209	0.0226	Akt2,Angpt1,Artn,Ccr4,Cxcl12,Il16,Itga2,Kdr,Met,Nrp1,Ntrk3,Ptprj,S1pr1,Scg2,Scrib,Sema5a,Smad3,Vegfa,Vegfc,Vegfd,Wnt5a
GO:0010638	positive regulation of organelle organization	1.42116	348	244.87	1.5e-08	1.21508	146	120.157	0.0473	Add3,Akt2,Anapc7,Apc,Arf6,Arhgap35,Arhgef10l,Arhgef15,Asap1,Atf7ip2,BC048507,Baiap2l1,Baiap2l2,Bcas3,Bcl2l11,Bid,Bmp10,Cav1,Ccn2,Cct7,Cdc42ep3,Cdc42ep4,Cdkn1b,Cenpe,Cep295,Cfl2,Clec16a,Cnot2,Dcn,Ddhd1,Ddhd2,Dhx36,Dlg1,Dmrt1,Dnm1l,Doc2b,Dzip1,Edn1,Fas,Fermt2,Flna,Fscn1,Fuz,Git1,Gm13306,Gm42878,Gnl3,Gpr65,Grb2,Hax1,Hck,Hif1a,Htr1a,Ift88,Igf1,Igf1r,Igf2,Ino80d,Katnb1,Kdr,Limk1,Lman1,Lnpk,Lpar1,Lrp5,…
GO:0045937	positive regulation of phosphate metabolic process	1.26825	676	533.019	1.7e-08	1.36371	285	208.989	2.76e-07	Acvr1,Acvr2a,Adipor2,Adra1a,Adra2b,Ajuba,Akap11,Akap13,Akap6,Akt2,Angpt1,Apln,App,Araf,Arl2bp,Arrb1,Atf2,Axin2,Bank1,Bcar3,Bcl2,Bdnf,Bmp10,Bmp2,Bmp3,Bmp4,Bmp5,Bmp8b,Bmpr1a,Bmpr2,Calm1,Calm2,Cartpt,Cav1,Ccn2,Ccnd1,Ccr7,Cd3e,Cd40,Cd44,Cdc6,Cdca2,Cdh5,Cdk5r1,Cdk5rap1,Cdkn1a,Cdkn1b,Cdon,Cenpe,Chrna7,Clcf1,Cntf,Cops8,Csf1r,Cspg4,Ctnnd1,Dab1,Dab2,Dab2ip,Dag1,Ddr1,Ddr2,Ddx3x,Dgkz,Dkk1,Dlg1,Dock7,Drd2,Dt…
GO:0048588	developmental cell growth	1.47796	287	194.186	1.72e-08	1.48578	91	61.2472	0.000754	Adra1a,Adrb1,Afdn,Akap13,Akap6,App,Auts2,Bcl11a,Bdnf,Bmpr2,Camk2d,Ccr5,Cdh4,Cntf,Col14a1,Csf1r,Cst10,Ctdp1,Cxcl12,Dbn1,Dclk1,Ddr1,Disc1,Edn1,Ednra,Efna5,Emx1,Ext1,Flrt1,Foxp1,Fxn,Igf1,Itga4,Itsn2,Jade2,Limk1,Lpar3,Macf1,Mag,Map1b,Mapt,Mecp2,Mgll,Mul1,Ndel1,Nedd4l,Ngf,Nin,Nr3c1,Nrp1,Nrp2,Ntrk3,Olfm1,Pdlim5,Picalm,Plxna1,Ptprs,Rgma,Rgs4,Rims1,Rims2,Rpl4,Rtn4,Rufy3,Ryk,Sema4d,Sema5a,Sema6a,Sema7a,Sh…
GO:0032885	regulation of polysaccharide biosynthetic process	2.51029	62	24.6984	1.8e-08	1.90122	16	8.41565	0.048	Akt2,Ap2a1,Dyrk2,Enpp1,Esrrb,Gfpt1,Has2,Igf1,Igf2,Inpp5k,Irs1,Nfkb1,Ppp1ca,Ppp1r3a,Ppp1r3b,Ptger4
GO:0032956	regulation of actin cytoskeleton organization	1.48331	279	188.092	1.84e-08	1.48312	121	81.585	6.88e-05	Add3,Akap13,Ap1ar,Arap1,Arf6,Arfgef1,Arhgap18,Arhgap28,Arhgap35,Arhgap6,Arhgef10l,Arhgef15,Arpc1b,Arpc5,Avil,Baiap2l1,Baiap2l2,Bcas3,Bmp10,Capza2,Capzb,Ccn2,Cdc42ep3,Cdc42ep4,Cdk5r1,Cfl2,Clasp1,Coro2b,Crk,Csf1r,Cyria,Cyria,Daam2,Dbn1,Dlg1,Edn1,Efna5,Eps8,Fermt2,Fgr,Fhod3,Flna,Fscn1,Gm13306,Gmfb,Gpr65,Grb2,Hax1,Hck,Inpp5k,Iqgap2,Jam3,Kank1,Kank2,Kank3,Kank4,Lima1,Limk1,Lmod3,Lpar1,Magel2,Map3k1,Me…
GO:0043542	endothelial cell migration	1.50091	266	177.225	1.88e-08	1.39071	79	56.8056	0.0126	Adamts9,Adgrb1,Akt3,Angpt1,Anxa3,Bcar1,Bcas3,Bmp10,Bmp4,Bmpr2,Ccbe1,Ccn3,Cd40,Cdh5,Clec14a,Col18a1,Cxcl12,Cyp1b1,Dab2ip,Dcn,Emp2,Epha2,Ets1,Fbxw7,Fgf1,Fgf18,Fgfr1,Foxp1,Fstl1,Gata3,Glul,Hdac9,Hif1a,Igf1,Igf2,Itgav,Jcad,Kdr,Klf4,Lpxn,Map3k3,Mecp2,Mef2c,Meox2,Met,Myh9,Nr2f2,Nrp1,Nus1,Pecam1,Pik3cd,Pik3cg,Pik3r2,Plk2,Plpp3,Plxnd1,Pparg,Prkd1,Prkd2,Prox1,Pten,Ptp4a3,Ptprm,Rgcc,Rhoj,Rin2,Sash1,Sema5a,…
GO:0009725	response to hormone	1.38489	388	280.166	2.33e-08	1.21745	146	119.923	0.045	Abcc2,Abhd2,Acvr1c,Adra1a,Agl,Akt2,Akt3,Anxa5,Arid5a,Arsb,Atp1a1,Atp2a2,Bbs2,Bcar1,Bcas3,Bcl2,Bmp4,Cacybp,Cav1,Ccnd1,Ccr7,Cdo1,Col3a1,Creb1,Crhr2,Crk,Cry1,Cyp11a1,Dab2,Ddit4,Echdc3,Edn1,Ednra,Efna5,Egr1,Eif2b3,Eif6,Enpp1,Esr1,Fas,Fbxo32,Fhl2,Fshr,Gas2l1,Gata6,Ghsr,Grb14,Hadha,Hdac9,Hmgb2,Hpn,Igf1,Igf1r,Igf2,Inhba,Inpp5k,Irf1,Irs1,Kank1,Kcnma1,Kcnq1,Kit,Klf9,Lepr,Lhcgr,Lpin1,Lpin2,Lpin3,Lpl,Map2k1…
GO:0040007	growth	1.23965	779	628.403	2.61e-08	1.30793	303	231.664	5.56e-06	Adipor2,Adra1a,Adrb1,Afdn,Agr2,Ahi1,Ahr,Akap13,Akap6,Akp3,Apba1,Apc,App,Arid5b,Atxn2,Auts2,Bbs2,Bcl11a,Bcl2,Bcl2l11,Bdnf,Bmp10,Bmp4,Bmpr1a,Bmpr1b,Bmpr2,Bnc2,Brca2,Brms1l,Cacna1c,Cadm1,Camk2d,Ccn3,Ccnb2,Ccr5,Cd44,Cda,Cdh4,Cdk1,Cdkn1a,Cdkn1b,Cgref1,Chd7,Chrna1,Cish,Clstn1,Clstn3,Cntf,Col14a1,Col3a1,Creb1,Crhr2,Crk,Csf1r,Cst10,Ctdp1,Cth,Cxcl12,Cyp19a1,Dab2,Dab2ip,Dbn1,Dcaf1,Dcbld2,Dclk1,Dcstamp,Dcun…
GO:0090030	regulation of steroid hormone biosynthetic process	2.7275	52	19.0651	2.61e-08	2.24072	11	4.90913	0.0435	Atp1a1,Bmp2,Bmp5,Dab2,Dkk3,Igf1,Igf1r,Igf2,Lhcgr,Nr3c1,Por
GO:0007265	Ras protein signal transduction	1.48189	273	184.225	2.84e-08	1.61228	124	76.9097	5.5e-07	Abca1,Abra,Adra1a,Adrb1,Akap13,Arap3,Arf6,Arfgef1,Arhgap24,Arhgap32,Arhgap35,Arhgef12,Arhgef28,Arhgef3,Arrb1,Auts2,Bcr,Camk2d,Cbl,Cdc42ep3,Cdc42ep4,Cdc42se2,Cdh2,Col1a2,Col3a1,Crk,Ctnnal1,Cyth4,Dab2ip,Dennd4b,Dgki,Dgkz,Dynlt1b,Ednra,Epo,Eps8,Erbb2,Erbin,F2r,F2rl2,Fbxo8,Flcn,Git1,Gm42878,Gna13,Gpr65,Grb2,Igf1,Iqsec1,Iqsec2,Itpkb,Jun,Kalrn,Kank1,Kank2,Kitl,Kpnb1,Lpar1,Map2k1,Map4k4,Mapkap1,Mapre2,M…
GO:0009792	embryo development ending in birth or egg hatching	1.46792	285	194.152	2.93e-08	1.30299	106	81.3513	0.021	1700067K01Rik,Acvr1,Adcy9,Akirin2,Angpt1,Apba1,Atf2,B9d1,Bcl2l11,Bmp2,Bmpr1a,Brca2,Ccnb2,Cdh1,Cdk5r1,Celf4,Chd7,Col3a1,Colec10,Coq7,Cr1l,Dab2,Dbn1,Dhx35,Edn1,Ednra,Emx1,Epn2,Ercc2,Esrrb,Fgfr1,Flcn,Fxn,Gabpa,Gata3,Gata6,Gja6,Gli2,Gli3,Gm28047,Gna13,Hand2,Igf2,Inpp5k,Kdm2a,Keap1,Kif1b,Lims1,Lrp1b,Man2a1,Mapk8ip3,Mecom,Msh2,Mtss1,Mybphl,Myh10,Myh9,Myo18b,Myo1e,Nog,Npat,Nr2f2,Nxn,Ocrl,Pdgfrb,Pdzk1,Pi…
GO:0043491	protein kinase B signaling	1.60767	194	120.671	2.93e-08	1.5074	74	49.0913	0.00194	Akt2,Angpt1,Arfgef1,Bank1,Cavin3,Cd40,Clcf1,Cxcl12,Dag1,Dlg1,Drd2,Egfr,Eng,Epha2,F3,Fermt2,Fgfr1,Flcn,Gata3,Gcnt2,Hax1,Igf1,Igf1r,Igf2,Igfbp5,Inpp4b,Inpp5k,Irs1,Itsn1,Kdr,Klf4,Lemd2,Lingo1,Mertk,Met,Mfhas1,Mst1r,Mtdh,Mul1,Ngfr,Nkx3-1,Nrg1,Nrxn1,Ntrk2,Ntrk3,Pax2,Pdgfa,Phlpp1,Pik3c2b,Pik3cd,Pik3cg,Plekha1,Pou5f1,Pten,Ptprj,Rapgef1,Rara,Rtn4,Sema5a,Sesn2,Sesn3,Setx,Sh2b3,Specc1l,Spry2,Src,Stk3,Tek,T…
GO:0001570	vasculogenesis	1.8142	130	71.6568	3.01e-08	1.98127	44	22.208	5.88e-05	Ackr3,Angpt1,Cav1,Cd34,Emp2,Eng,Enpp1,Epha2,Epo,Fbxw7,Fgf1,Fgf9,Fgfr1,Gm49359,Has2,Hey1,Itgb8,Kdr,Myo18b,Myo1e,Ntrk2,Pitx2,Prok2,Ptprj,Qki,Rap1a,Rapgef2,Rapgef2,Rin2,Rtn4,Shh,Sox17,T,Tbx20,Tek,Tgfbr2,Tgfbr3,Tie1,Tiparp,Tmem100,Wt1,Zfp36l1,Zfpm2,Zmiz1
GO:0051642	centrosome localization	2.67698	53	19.7984	3.17e-08	2.13887	16	7.48058	0.0158	Bicd2,Ccdc141,Dlg1,Dync1li2,Ezr,Nde1,Ndel1,Nin,Pard3,Pard3b,Plxna2,Sema6a,Sun1,Sun2,Syne2,Tmem201
GO:0070371	ERK1 and ERK2 cascade	1.42536	325	228.012	3.29e-08	1.52687	121	79.2473	1.61e-05	Ackr3,Acta2,Adra1a,Angpt1,App,Arhgap8,Arrb1,Atf3,Bmp2,Bmp4,Camk2d,Cav1,Cavin3,Ccl25,Ccn2,Cd44,Chrna7,Clcf1,Crhr2,Csf1r,Cxcl12,Dab2,Dab2ip,Dcc,Ddr2,Denn2b,Dlg1,Dnajc27,Drd2,Dusp1,Dusp10,Dusp4,Dusp6,Dynlt1b,E130311K13Rik,Edn1,Ednra,Egfr,Epha2,Ephb1,Epo,Erbb2,Erbb4,Esr1,Esr2,Ezr,F2r,Fam83d,Fbln1,Fbxw7,Fermt2,Fgf1,Fgf18,Fgf23,Fgfr4,Flcn,Fshr,Garem1,Gcnt2,Hand2,Htr2a,Htr2c,Igf1,Ins2,Itgav,Jun,Kdr,Klf4…
GO:0001667	ameboidal-type cell migration	1.34447	447	332.473	3.47e-08	1.49031	162	108.702	1.51e-06	Acta2,Acvr1,Acvr1c,Adamts9,Adgrb1,Adipor2,Ago2,Akt3,Angpt1,Anxa3,Anxa6,Apc,Arf6,Arhgap5,Arid5b,Arsb,Bcar1,Bcas3,Bmp10,Bmp4,Bmpr2,Capn7,Ccbe1,Ccn3,Cd40,Cdh2,Cdh5,Cer1,Clasp1,Clec14a,Col18a1,Coro1c,Cxcl12,Cyp1b1,Daam2,Dab2ip,Dcn,Ddr2,Dock5,Dusp10,Edn1,Ednra,Efnb1,Emp2,Enpp2,Epha2,Erbb4,Ets1,Fbxw7,Fermt1,Fgf1,Fgf18,Fgfr1,Fndc3b,Foxp1,Fstl1,Fut8,Gab2,Gata3,Gbx2,Glul,Gna13,Hand2,Has2,Hdac9,Hif1a,Ifng,…
GO:0048534	hematopoietic or lymphoid organ development	1.34879	434	321.769	3.92e-08	1.33872	174	129.975	0.000415	Acvr2a,Ahctf1,Ahr,Angpt1,Ankrd54,Ap3d1,Apc,Apcs,Arid1b,Arid2,Asxl2,Atg7,B2m,Barx1,Bcl2,Bcl2l11,Bcr,Bmp4,Brca2,Cartpt,Cbfb,Ccdc134,Ccnb2,Ccr5,Ccr7,Cd34,Cd40lg,Cd44,Cd46,Cd83,Cdh17,Cdk13,Clptm1,Creb1,Csf1r,Ctla4,Dcstamp,Dlk1,Dusp10,Eif6,Epas1,Erbb2,Ets1,Evi2,Fas,Fbxw7,Fgf3,Flcn,Flt3l,Foxp1,Fshb,Fshr,Gabpa,Gas2l1,Gata3,Gfi1b,Gli3,Gm49359,Gm9774,Gpr68,Hand2,Hax1,Hif1a,Hlx,Hmgb2,Hmgb3,Hoxb3,Ifng,Ikzf3…
GO:0031589	cell-substrate adhesion	1.43215	316	220.648	3.96e-08	1.64999	135	81.8188	3.02e-08	Abi3bp,Adamts9,Agr2,Akip1,Angpt1,Antxr1,Ap1ar,Apod,Arhgap6,Atrnl1,Atxn3,B4galt1,Bcar1,Bcas3,Bcl2,Bcl2l11,Bves,Cask,Ccl25,Ccn2,Cd34,Cd3e,Clasp1,Cntn2,Col1a1,Col3a1,Col8a1,Coro1c,Coro2b,Crk,Dab2,Dag1,Dbn1,Ddr1,Disc1,Dmp1,Dock5,Ecm2,Efna5,Egfl6,Egflam,Emp2,Enpp2,Ephb1,Fbln1,Fermt1,Fermt2,Flna,Fndc3b,Frem1,Fzd7,Gcnt2,Has2,Itga11,Itga2,Itga4,Itga9,Itgae,Itgav,Itgb6,Itgb8,Jag1,Jam3,Kank1,Kdr,Lama5,Lamb…
GO:0051894	positive regulation of focal adhesion assembly	2.92994	45	15.3587	4.01e-08	2.06512	14	6.77927	0.0385	Enpp2,Fermt2,Kdr,Lims1,Map4k4,Nrp1,Ptpn11,Ptprj,Rock1,Smad3,Tek,Thy1,Tsc1,Vegfa
GO:0003014	renal system process	1.82044	124	68.1152	4.9e-08	1.54884	42	27.1171	0.02	Abcg2,Adora2a,Adra1a,Adra1d,Adrb1,Akap11,Amn,Aqp3,Aqp7,Bcl2,Bcr,Bmp4,Cldn4,Corin,Coro2b,Dab2,Drd2,Edn1,Ednra,Emp2,F2r,Gja6,Inpp5k,Kcnj1,Kcnma1,Kcnq1,Maged2,Myo1e,Npr3,Nr3c2,Pon3,Ppp3ca,Ptger3,Ptger4,Ptpro,Rrm2b,Slc15a2,Snx5,Stc1,Sulf1,Sulf2,Tbc1d8b
GO:0043114	regulation of vascular permeability	2.36765	66	27.8757	5.31e-08	1.87803	18	9.58449	0.0385	Abr,Adora2a,Angpt1,Arhgap35,Bcr,Cdh5,Fermt2,Gm45837,Nr3c1,Pde3a,Ptp4a3,Ptprj,Sh3gl2,Slit2,Tacr2,Tjp1,Tjp2,Vegfa
GO:0048589	developmental growth	1.26886	630	496.507	6.03e-08	1.3633	225	165.04	9.47e-06	Adra1a,Adrb1,Afdn,Agr2,Ahr,Akap13,Akap6,Akp3,Apba1,Apc,App,Arid5b,Atxn2,Auts2,Bbs2,Bcl11a,Bcl2,Bcl2l11,Bdnf,Bmp10,Bmp4,Bmpr1a,Bmpr1b,Bmpr2,Bnc2,Brca2,Cacna1c,Cadm1,Camk2d,Ccn3,Ccr5,Cdh4,Cdk1,Cdkn1a,Cdkn1b,Chd7,Chrna1,Cntf,Col14a1,Col3a1,Creb1,Crhr2,Csf1r,Cst10,Ctdp1,Cxcl12,Cyp19a1,Dbn1,Dclk1,Ddr1,Ddr2,Disc1,Dlg1,Dlk1,Drd2,Dusp10,Dusp6,Edn1,Ednra,Efna5,Emx1,Enpp1,Erbb4,Ercc2,Esr1,Ext1,Ezr,Fgf1,Fgf…
GO:0030224	monocyte differentiation	2.4547	59	24.0356	7.35e-08	2.13887	14	6.5455	0.0282	Apcs,Bmp4,Dcstamp,Foxp1,Gpr68,Inpp5d,Jun,Mef2c,Myc,Pir,Pparg,Sp3,Vegfa,Zfp36l1
GO:0033002	muscle cell proliferation	1.45377	281	193.29	7.5e-08	1.46996	89	60.5459	0.00126	Adamts1,Angpt1,Apc,Apln,Apod,Arid2,Bmp10,Bmp2,Bmp4,Bmpr1a,Bmpr2,Calcrl,Camk2d,Cav1,Ccn3,Cdk1,Cdkn1a,Cdkn1b,Ddr2,Edn1,Ednra,Egr1,Enpp1,Ephb1,Erbb4,Ern1,Esr1,Esr2,Fgf1,Fgf9,Fgfr1,Flt1,Foxp1,Gata6,Gja6,Gna13,Hgf,Hif1a,Ifng,Igf1,Igf1r,Igfbp5,Il13,Il15,Irak1,Itga2,Jun,Kalrn,Klf4,Mapk11,Mdm2,Mef2c,Mnat1,Myc,Myh10,Naa35,Nampt,Ndrg4,Nog,Npr3,Nr4a3,Nrg1,P2ry6,Pdgfrb,Pik3r1,Pparg,Ppargc1a,Pten,Rgs5,S1pr1,S…
GO:0007167	enzyme-linked receptor protein signaling pathway	1.23555	743	601.351	1.03e-07	1.49234	322	215.768	1.53e-12	Acvr1,Acvr1c,Acvr2a,Afap1l2,Agr2,Ahi1,Akap7,Akt2,Angpt1,Angptl1,Apc,Apln,Apod,Arf4,Arid5b,Aspn,Atf2,Baiap2l1,Bcar1,Bcar3,Bcr,Bdnf,Bmp10,Bmp2,Bmp3,Bmp4,Bmp5,Bmp8b,Bmpr1a,Bmpr1b,Bmpr2,Brms1l,Casp3,Cav1,Cbl,Cblb,Ccbe1,Ccn2,Ccn3,Cdh5,Cdk5r1,Cep57,Cer1,Chn1,Cilp,Clec14a,Col1a1,Col1a2,Col3a1,Creb1,Creb3l1,Crebbp,Crim1,Crk,Csf1r,Cspg4,Dab2,Dab2ip,Dcn,Dcp1a,Ddit4,Ddr1,Ddr2,Dgkd,Dkk1,Dlx3,Dmrt1,Dok5,Dsg4,…
GO:0048638	regulation of developmental growth	1.36688	381	278.736	1.12e-07	1.4111	127	90.0007	0.000428	Adrb1,Afdn,Agr2,Ahr,Akap6,Apc,App,Atxn2,Bbs2,Bcl11a,Bcl2,Bcl2l11,Bdnf,Bmp10,Bmp4,Bmpr1a,Bmpr2,Cacna1c,Ccr5,Cdh4,Cdk1,Cdkn1a,Cdkn1b,Chd7,Cntf,Col14a1,Creb1,Ctdp1,Cxcl12,Dbn1,Disc1,Dlg1,Drd2,Dusp10,Dusp6,Edn1,Efna5,Erbb4,Ezr,Fgf9,Fgfr1,Foxp1,Fxn,Gata6,Ghsr,Gja6,Gjd4,Hlx,Hnf1b,Igf1,Igf1r,Igf2,Itsn2,Limk1,Lpar3,Macf1,Mag,Map1b,Mapk11,Mapt,Mecp2,Mef2c,Mgll,Mul1,Ndel1,Nedd4l,Ngf,Nog,Nppc,Nr3c1,Nrg1,Nrp…
GO:0030097	hemopoiesis	1.36195	386	283.418	1.21e-07	1.36468	156	114.313	0.000389	Acvr2a,Ahctf1,Ahr,Angpt1,Ankrd54,Ap3d1,Apc,Apcs,Arid1b,Arid2,Asxl2,Atg7,B2m,Bcl2,Bcr,Bmp4,Brca2,Cartpt,Cbfb,Ccdc134,Ccr5,Ccr7,Cd34,Cd40lg,Cd44,Cd46,Cd83,Cdk13,Clptm1,Creb1,Csf1r,Ctla4,Dcstamp,Dlk1,Dusp10,Eif6,Epas1,Erbb2,Ets1,Evi2,Fas,Fbxw7,Flcn,Flt3l,Foxp1,Fshb,Fshr,Gabpa,Gas2l1,Gata3,Gfi1b,Gli3,Gm49359,Gm9774,Gpr68,Hax1,Hif1a,Hlx,Hmgb2,Hmgb3,Hoxb3,Ifng,Ikzf3,Il15,Il17d,Il4,Inhba,Inpp4b,Inpp5d,I…
GO:0001817	regulation of cytokine production	1.34718	410	304.339	1.33e-07	1.18282	193	163.17	0.0468	Abcd2,Adam33,Afap1l2,Akirin2,Alox5,Angpt1,Ankrd42,Apod,App,Arg1,Arid5a,Arrb1,Atf2,B2m,Bank1,Bmpr1a,Cadm1,Ccbe1,Ccr5,Ccr7,Cd226,Cd274,Cd34,Cd3e,Cd40,Cd40lg,Cd46,Cd83,Cd84,Chid1,Chrna7,Clec9a,Cmklr1,Creb1,Crebbp,Crhr2,Crp,Csf1r,Cyp1b1,Ddx3x,Dennd1b,Dhx36,Dhx9,Dlk1,Drd2,Egr1,Epha2,Erbin,Ezr,F2r,F3,Fbln1,Fcgr3,Fermt1,Fgfr1,Fgfr4,Fgr,Flt1,Foxp1,Gata3,Gata6,Ghsr,Git1,Gprc5b,Hdac9,Hgf,Hif1a,Hk1,Hmgb2,Ho…
GO:1902903	regulation of supramolecular fiber organization	1.44069	283	196.434	1.41e-07	1.44518	125	86.4942	0.000177	Add3,Akap13,Ap1ar,Apc,App,Arap1,Arf6,Arfgef1,Arhgap18,Arhgap28,Arhgap35,Arhgap6,Arhgef10l,Arhgef15,Arpc1b,Arpc5,Avil,Baiap2l1,Baiap2l2,Bmp10,Camsap1,Capza2,Capzb,Cav1,Ccn2,Cdc42ep3,Cdc42ep4,Cdh5,Cdkn1b,Cfl2,Chrna7,Clasp1,Coro2b,Cyria,Cyria,Daam2,Dbn1,Dlg1,Edn1,Eps8,Fermt2,Fhod3,Flna,Gas2l1,Git1,Gmfb,Gpr65,Grb2,Hax1,Htr1a,Inpp5k,Kank1,Kank2,Kank3,Kank4,Katnb1,Ldlr,Lima1,Limk1,Lmod3,Lpar1,Magel2,Ma…
GO:1902532	negative regulation of intracellular signal transduction	1.35897	386	284.039	1.43e-07	1.34031	167	124.598	0.000525	Ackr3,Adra1a,Aida,Ajuba,Apc,Arap3,Arhgap24,Arhgap25,Arhgap35,Arrb1,Atf3,Bank1,Bcl2,Bid,Bmp2,Bmp4,Castor2,Cav1,Cavin3,Ccn3,Cd22,Cd44,Cep63,Chrna7,Creb3l1,Cxcl12,Dab2,Dab2ip,Dact1,Dag1,Ddit4,Ddx3x,Depdc5,Dgkd,Dgkg,Dgkz,Dlg1,Dlg5,Dnaja1,Drd2,Dusp1,Dusp10,Dusp16,Dusp19,Dusp27,Dusp4,Dusp6,Dynlt1b,Dyrk2,Dyrk3,E130311K13Rik,Epha2,Epo,Erbin,Esr1,Ezr,Fbln1,Fhl2,Fktn,Flcn,Fnip1,G2e3,Git1,Gm42878,Gm45837,Hi…
GO:0051493	regulation of cytoskeleton organization	1.36775	373	272.71	1.48e-07	1.40147	172	122.728	3.58e-05	Add3,Akap13,Ap1ar,Apc,Arap1,Arf6,Arfgef1,Arhgap18,Arhgap28,Arhgap35,Arhgap6,Arhgef10l,Arhgef15,Arpc1b,Arpc5,Avil,Baiap2l1,Baiap2l2,Bcas3,Bicd1,Bicd2,Bmp10,Camsap1,Capza2,Capzb,Cav1,Ccdc84,Ccn2,Ccsap,Cdc42ep3,Cdc42ep4,Cdh5,Cdk5r1,Cdkn1b,Cep295,Cfl2,Clasp1,Coro2b,Crk,Csf1r,Cyria,Cyria,Daam2,Dbn1,Dlg1,Dst,Dynlt1b,Edn1,Efna5,Eps8,Fermt2,Fgr,Fhod3,Flna,Fscn1,Gas2l1,Git1,Gm13306,Gmfb,Gpr65,Grb2,Hax1,Hc…
GO:0051336	regulation of hydrolase activity	1.26944	588	463.197	1.73e-07	1.2872	266	206.651	9.72e-05	Abr,Acvr1c,Adora2a,Adra1a,Adrb1,Afdn,Ahr,Aip,Ajuba,Akirin2,Akt2,Antxr1,Apcs,Aph1b,App,Arap1,Arap3,Arf4,Arfgef1,Arhgap24,Arhgap25,Arhgap35,Arhgap6,Arhgef15,Arhgef26,Arrb1,Asap1,Asph,Atp2a3,Bcar3,Bcas3,Bcl2l11,Bcr,Bicd1,Bid,Bmp2,Bod1,Bves,Calm1,Calm2,Cast,Cav1,Cblb,Ccl25,Ccn2,Ccr7,Cd40,Cd44,Cdh1,Chn1,Chn2,Cldn4,Coro1c,Cradd,Crk,Dab2ip,Dap,Ddx3x,Dennd1b,Dgki,Dock10,Dock7,Dock9,Drd2,Dynlt1b,Efna5,Eph…
GO:0001569	branching involved in blood vessel morphogenesis	2.08602	79	37.8712	2.01e-07	2.38758	24	10.052	0.000257	Acvr1,Ahr,Angpt1,Cxcl12,Edn1,Ednra,Eng,Flt1,Gbx2,Gna13,Kdr,Lef1,Nrp1,Pitx2,Plxnd1,Sema5a,Sfrp2,Shh,Srf,Stk4,Tbx20,Tek,Tgfbr2,Vegfa
GO:0048754	branching morphogenesis of an epithelial tube	1.50548	225	149.454	2.04e-07	1.73626	69	39.7406	3.58e-05	Acvr1,Ahr,Angpt1,B4galt1,Bcl2,Bmp2,Bmp4,Btrc,Cd44,Cxcl12,Dag1,Ddr1,Dlg1,Dlg5,Edn1,Ednra,Eng,Epha2,Esr1,Ext1,Eya1,Flt1,Gbx2,Gli2,Gli3,Gna13,Greb1l,Hnf1b,Igf1,Kdr,Lama5,Lef1,Lgr4,Lrp5,Met,Myc,Nfatc1,Nkx3-1,Nog,Npnt,Nrp1,Pax2,Pbx1,Pitx2,Plxnd1,Ppp1ca,Rspo2,Sema5a,Sfrp2,Shh,Slit2,Sox8,Spry2,Src,Srf,Stk4,Tbx2,Tbx20,Tbx3,Tcf21,Tek,Tgfbr2,Tie1,Tmem67,Vegfa,Wnt2,Wnt5a,Wnt6,Wt1
GO:0030155	regulation of cell adhesion	1.26297	606	479.822	2.17e-07	1.42967	254	177.664	2.53e-08	Abi3bp,Adora2a,Afdn,Agr2,Alox5,Angpt1,Ank3,Ap1ar,Ap3d1,Apc,Apod,Arg1,Arhgap6,Arid1b,Arid2,Atxn3,B2m,Bcar1,Bcas3,Bcl2,Bmp2,Bmp4,Cask,Casp3,Cav1,Cbfb,Cblb,Cbll1,Ccl25,Ccr5,Ccr7,Cd274,Cd3e,Cd40lg,Cd44,Cd46,Cd83,Cd9,Cdh1,Cdsn,Celsr2,Chst2,Clasp1,Col1a1,Col8a1,Coro1c,Coro2b,Crk,Ctla4,Cxcl12,Cyp1b1,Dab1,Dab2,Dag1,Dbn1,Ddr1,Dennd6a,Disc1,Dlg1,Dlg5,Dmp1,Dock5,Dscaml1,Dusp1,Dusp10,Ecm2,Efna5,Efnb1,Egfl6,E…
GO:0051924	regulation of calcium ion transport	1.47605	243	164.628	2.44e-07	1.36041	90	66.1563	0.0126	Adora2a,Adrb1,Ahr,Akap6,Ank2,Asph,Atp1b1,Atp2c2,Bcl2,Best1,Bmp4,Cacna1c,Cacna1g,Cacna2d1,Calm1,Calm2,Camk2d,Cask,Casq2,Cav1,Cd84,Chd7,Cracr2a,Crhr2,Cxcl12,Drd2,Ednra,Epb41,Epo,F2r,Fcrl5,Fkbp1a,Fyn,Gem,Gja6,Glp1r,Gramd2,Grin1,Homer2,Igf1,Il13,Il16,Inpp5k,Itpr1,Kcne1,Kcne2,Lhcgr,Lime1,Lpar3,Mchr1,Mettl21c,Ngf,Nos1ap,Npsr1,Oprd1,P2rx1,P2ry6,Pawr,Pde4b,Pdgfrb,Pik3cg,Pla2g6,Pln,Ppp3ca,Ppp3cc,Prkce,Prk…
GO:0061138	morphogenesis of a branching epithelium	1.47884	241	162.966	2.53e-07	1.66357	77	46.2861	5.54e-05	Acvr1,Ahr,Angpt1,B4galt1,Bcl2,Bmp2,Bmp4,Btrc,Cd44,Cdh1,Cxcl12,Dag1,Ddr1,Dlg1,Dlg5,Edn1,Ednra,Eng,Epha2,Esr1,Ext1,Eya1,Fem1b,Fgfr1,Flt1,Gbx2,Gli2,Gli3,Gna13,Grb2,Greb1l,Hgf,Hnf1b,Igf1,Kdr,Lama5,Lef1,Lgr4,Lrp5,Met,Myc,Nfatc1,Nkx3-1,Nog,Npnt,Nrp1,Pax2,Pbx1,Pdgfa,Pitx2,Plxnd1,Ppp1ca,Prox1,Rspo2,Sema5a,Sfrp2,Shh,Slit2,Sox8,Spry2,Src,Srf,Stk4,Tbx2,Tbx20,Tbx3,Tcf21,Tek,Tgfbr2,Tgm2,Tie1,Tmem67,Vegfa,Wnt2…
GO:0051403	stress-activated MAPK cascade	1.49969	225	150.031	2.65e-07	1.54914	88	56.8056	0.000226	Aida,App,Atf2,Bmp2,Bmp4,Ccn2,Ccr5,Cracr2a,Crhr2,Crk,Dab2,Dab2ip,Dact1,Dlg1,Dnaja1,Dusp1,Dusp10,Dusp16,Dusp19,Egfr,Ephb1,Ezr,Fas,Fcgr3,Fgd4,Fktn,Gadd45g,Gm28047,Hand2,Hgf,Hipk2,Hsph1,Igf1r,Irak1,Lrrk2,Map2k1,Map2k6,Map3k1,Map3k11,Map3k3,Map3k7,Map4k4,Mapk10,Mapk11,Mapk8,Mapk8ip3,Mapkapk2,Mbip,Mdfi,Mdfic,Mecom,Met,Mfhas1,Mid1,Mink1,Mturn,Nfkb1,Nod1,Phlpp1,Pja2,Plcb1,Ptger4,Rapgef1,Rassf2,Ripk2,Ror2…
GO:0051345	positive regulation of hydrolase activity	1.34985	388	287.439	2.65e-07	1.46255	173	118.287	2.1e-06	Abr,Acvr1c,Adra1a,Adrb1,Afdn,Akirin2,Akt2,Antxr1,Aph1b,App,Arap1,Arap3,Arf4,Arhgap24,Arhgap25,Arhgap35,Arhgap6,Arhgef15,Arhgef26,Arrb1,Asap1,Asph,Atp2a3,Bcar3,Bcas3,Bcl2l11,Bcr,Bid,Bmp2,Calm1,Calm2,Ccl25,Ccn2,Ccr7,Cd40,Chn1,Chn2,Cldn4,Coro1c,Cradd,Crk,Dap,Ddx3x,Dennd1b,Dock10,Dock7,Dock9,Epha2,Erbb2,Esr1,F2r,F3,Fabp1,Fas,Fermt2,Fgfr1,Flcn,Flt1,Fyn,Garnl3,Gna13,Gpr65,Gramd4,Grin1,Hmgb2,Htr2a,Ifng,…
GO:0060306	regulation of membrane repolarization	2.34976	59	25.109	2.67e-07	2.53991	19	7.48058	0.000595	Akap6,Akap7,Ank2,Cacna2d1,Casq2,Cav1,Flna,Gja6,Kcne1,Kcne2,Kcne4,Kcnh2,Kcnj2,Kcnq1,Nedd4l,Nos1ap,Scn1b,Scn4b,Snta1
GO:0042327	positive regulation of phosphorylation	1.25677	612	486.964	2.97e-07	1.38043	263	190.521	3.33e-07	Acvr1,Acvr2a,Adipor2,Adra1a,Adra2b,Ajuba,Akap11,Akap13,Akap6,Akt2,Angpt1,Apln,App,Araf,Arl2bp,Arrb1,Atf2,Axin2,Bank1,Bcar3,Bcl2,Bdnf,Bmp10,Bmp2,Bmp3,Bmp4,Bmp5,Bmp8b,Bmpr1a,Bmpr2,Cartpt,Cav1,Ccn2,Ccnd1,Ccr7,Cd3e,Cd40,Cd44,Cdc6,Cdk5r1,Cdk5rap1,Cdkn1a,Cdkn1b,Cdon,Cenpe,Chrna7,Clcf1,Cntf,Cops8,Csf1r,Cspg4,Ctnnd1,Dab1,Dab2,Dab2ip,Dag1,Ddr1,Ddr2,Ddx3x,Dgkz,Dkk1,Dlg1,Dock7,Drd2,Dtnbp1,Dusp19,Edn1,Ednra,…
GO:0045926	negative regulation of growth	1.48983	230	154.381	3.2e-07	1.491	84	56.3381	0.00118	Adipor2,Adrb1,Apc,Atxn2,Bbs2,Bcl11a,Bcl2,Bmp10,Bmp4,Bmpr2,Ccn3,Ccr5,Cda,Cdkn1a,Cdkn1b,Cgref1,Ctdp1,Cth,Dab2,Dab2ip,Dcbld2,Dcstamp,Dcun1d3,Ddx3x,Dnajb2,Dusp10,Ei24,Enpp1,Fhl1,Flcn,Foxp1,Frzb,Fxn,Gas2l1,Gja6,Hif1a,Igfbp5,Inhba,Mag,Mapk11,Mecp2,Mul1,Nog,Nrp1,Osgin2,Pparg,Psrc1,Pten,Ptprj,Ptprs,Rgma,Rgs4,Rtn4,Ryk,Sav1,Sema4d,Sema5a,Sema6a,Sema7a,Serpine2,Sesn2,Sfrp2,Sh3bp4,Slit1,Slit2,Slit3,Smad3,Sma…
GO:0043254	regulation of protein-containing complex assembly	1.40777	299	212.393	4.23e-07	1.38367	131	94.676	0.000769	Abca1,Add3,Ahr,Aida,Ajuba,Ankrd27,Apc,Arf6,Arfgef1,Arhgap18,Arhgap28,Arpc1b,Arpc5,Asap1,Avil,Baiap2l1,Baiap2l2,Bcl2l11,Bid,Camsap1,Cand1,Capza2,Capzb,Cav1,Cdc42ep3,Cdc42ep4,Cdh17,Cdh5,Cdkn1b,Crbn,Creb1,Cyria,Cyria,Daam2,Dab2ip,Dact1,Dbn1,Ddx3x,Dkk1,Dlg1,Dnajc15,Eif4g1,Eps8,Esr1,Fas,Fermt1,Fermt2,Fhod3,Fnip1,Fnip2,Fscn1,Git1,Grb2,Hax1,Hck,Ice1,Ifng,Ikbke,Isl1,Jam3,Kank1,Kank3,Kank4,Lmo4,Lmod3,Map1…
GO:0048010	vascular endothelial growth factor receptor signaling pathway	2.06797	76	36.7511	4.75e-07	2.1864	23	10.5196	0.0016	Angpt1,Bcar1,Bmp4,Clec14a,Dab2ip,Epn2,Fgf18,Fgf9,Flt1,Hif1a,Kdr,Mapkapk2,Myof,Nedd4,Nrp1,Prkd1,Prkd2,Ptpn1,Sulf1,Tek,Vegfa,Vegfc,Vegfd
GO:0007163	establishment or maintenance of cell polarity	1.55544	187	120.223	4.89e-07	1.52297	68	44.6497	0.0025	Alpk2,Amotl2,Apc,Arf4,Arf6,Arfgef1,Arhgap35,Arpc5,Bcas3,Brsk2,Ccr7,Cdh5,Crb1,Crk,Dlg1,Dlg5,Dock7,Dst,Ephb1,Exoc4,Eya1,Ezr,Fat1,Fermt1,Fez1,Frmd4a,Frmd4b,Fscn1,Gata3,Gja6,Hey1,Igf1,Igf1r,Jam3,Kank1,Kif26b,Lims1,Lrrc7,Macf1,Map1b,Myh9,Myo9a,Pard3,Pard3b,Pard6b,Parva,Parvb,Plekhg3,Prickle2,Ptk7,Rac2,Rap1b,Rhobtb1,Rhobtb3,Rhod,Rhog,Ripor2,Rnd3,Rufy3,Scrib,Sdccag8,Shh,Sipa1l3,Syne2,Tek,Traf3ip2,Ust,Wn…
GO:0048872	homeostasis of number of cells	1.58779	170	107.067	5.17e-07	1.47658	68	46.0523	0.00603	Afdn,Ahr,Akt3,Atxn2,Bcl2,Bcl2l11,Bcr,Casp3,Ccn3,Ccnb2,Ccr4,Ccr5,Ccr7,Cdh2,Chst3,Col14a1,Dock10,Emcn,Emx1,Enpp1,Ext1,Ezh1,F2r,Fancc,Fas,Flt3l,Fstl1,Gata3,Gcnt4,Glis2,Hif1a,Ift88,Ildr2,Itpkb,Jam3,Lgr4,Lpcat3,Mecom,Mef2c,Mthfd1,Napepld,Nbea,P2ry14,Pde4b,Pik3cd,Ptpn11,Rassf2,Rps24,Sash3,Septin4,Sh2b2,Sh2b3,Slc40a1,Slc46a2,Smarca2,Sod1,Sos1,Spns2,Stat4,Tet2,Tnfaip3,Traf3ip2,Ubap2l,Vegfa,Vps54,Zbtb18,Z…
GO:0090257	regulation of muscle system process	1.47526	232	157.26	5.17e-07	1.55554	88	56.5719	0.000196	Adra1a,Adra2b,Adrb1,Akap1,Akap6,Ank2,Anxa6,Atp1a1,Atp1b1,Atp2a2,Bmp10,Cacna1c,Cacna1h,Cacna2d1,Calcrl,Calm1,Calm2,Camk2d,Casq2,Cav1,Ccn2,Chrm2,Ctdp1,Ctnna3,Dbn1,Dlg1,Dock4,Dock5,Edn1,F2r,Fbxo32,Flt1,Foxp1,Ghsr,Gtf2i,Gucy1a1,Hand2,Igf1,Igfbp5,Itga2,Kbtbd13,Kcna1,Kcnj2,Kcnma1,Kcnq1,Kit,Klf4,Map2k1,Mef2a,Mef2c,Mlip,Mtpn,Ncf1,Nfatc1,Npnt,Nppc,Nr3c1,Nr4a3,Ormdl3,P2rx1,Pawr,Pde4b,Pde5a,Pde9a,Pln,Pparg,…
												Enhancers_Heart_10572,Enhancers_Heart_16761,Enhancers_Heart_16764,Enhancers_Heart_18011,Enhancers_Heart_18014,Enhancers_Heart_18015,Enhancers_Heart_20880,Enhancers_Heart_20881,Enhancers_Heart_20882,Enhancers_Heart_20906,Enhancers_Heart_20908,Enhancers_Heart_20937,Enhancers_Heart_20974,Enhancers_Heart_21489,Enhancers_Heart_21545,Enhancers_Heart_21547,Enhancers_Heart_24086,Enhancers_Heart_24094,Enh…
												Enhancers_Heart_10108,Enhancers_Heart_10219,Enhancers_Heart_10907,Enhancers_Heart_10909,Enhancers_Heart_10910,Enhancers_Heart_10929,Enhancers_Heart_10930,Enhancers_Heart_10931,Enhancers_Heart_1134,Enhancers_Heart_11533,Enhancers_Heart_11534,Enhancers_Heart_11547,Enhancers_Heart_11551,Enhancers_Heart_12078,Enhancers_Heart_12593,Enhancers_Heart_12615,Enhancers_Heart_13255,Enhancers_Heart_13265,Enha…
												Enhancers_Heart_12372,Enhancers_Heart_13290,Enhancers_Heart_22066,Enhancers_Heart_22069,Enhancers_Heart_22072,Enhancers_Heart_22073,Enhancers_Heart_22074,Enhancers_Heart_22091,Enhancers_Heart_22111,Enhancers_Heart_22115,Enhancers_Heart_22118,Enhancers_Heart_25364,Enhancers_Heart_25557,Enhancers_Heart_28319,Enhancers_Heart_28320,Enhancers_Heart_28323,Enhancers_Heart_28329,Enhancers_Heart_28339,Enh…
												Enhancers_Heart_10078,Enhancers_Heart_10907,Enhancers_Heart_10909,Enhancers_Heart_10910,Enhancers_Heart_10929,Enhancers_Heart_10930,Enhancers_Heart_10931,Enhancers_Heart_12372,Enhancers_Heart_12593,Enhancers_Heart_12615,Enhancers_Heart_15729,Enhancers_Heart_15730,Enhancers_Heart_20060,Enhancers_Heart_20064,Enhancers_Heart_20085,Enhancers_Heart_26195,Enhancers_Heart_26212,Enhancers_Heart_26213,Enh…
												Enhancers_Heart_10572,Enhancers_Heart_12078,Enhancers_Heart_202,Enhancers_Heart_22066,Enhancers_Heart_22069,Enhancers_Heart_22072,Enhancers_Heart_22073,Enhancers_Heart_22074,Enhancers_Heart_22091,Enhancers_Heart_22603,Enhancers_Heart_22604,Enhancers_Heart_22615,Enhancers_Heart_22629,Enhancers_Heart_2660,Enhancers_Heart_26761,Enhancers_Heart_26763,Enhancers_Heart_26764,Enhancers_Heart_26765,Enhanc…
												Enhancers_Heart_14990,Enhancers_Heart_14995,Enhancers_Heart_14997,Enhancers_Heart_17274,Enhancers_Heart_17672,Enhancers_Heart_18011,Enhancers_Heart_18014,Enhancers_Heart_18015,Enhancers_Heart_18039,Enhancers_Heart_18045,Enhancers_Heart_18046,Enhancers_Heart_18049,Enhancers_Heart_18057,Enhancers_Heart_18058,Enhancers_Heart_20479,Enhancers_Heart_22502,Enhancers_Heart_22546,Enhancers_Heart_22551,Enh…
												Enhancers_Heart_10829,Enhancers_Heart_10833,Enhancers_Heart_14640,Enhancers_Heart_14641,Enhancers_Heart_14643,Enhancers_Heart_14655,Enhancers_Heart_21078,Enhancers_Heart_21108,Enhancers_Heart_21114,Enhancers_Heart_21123,Enhancers_Heart_21125,Enhancers_Heart_21141,Enhancers_Heart_35993,Enhancers_Heart_36001,Enhancers_Heart_36005,Enhancers_Heart_53937,Enhancers_Heart_60252,Enhancers_Heart_60269,Enh…
												Enhancers_Heart_10907,Enhancers_Heart_10909,Enhancers_Heart_10910,Enhancers_Heart_10929,Enhancers_Heart_10930,Enhancers_Heart_10931,Enhancers_Heart_16620,Enhancers_Heart_20479,Enhancers_Heart_24673,Enhancers_Heart_24840,Enhancers_Heart_24891,Enhancers_Heart_26195,Enhancers_Heart_26212,Enhancers_Heart_26213,Enhancers_Heart_26227,Enhancers_Heart_26239,Enhancers_Heart_26247,Enhancers_Heart_26248,Enh…
												Enhancers_Heart_14640,Enhancers_Heart_14641,Enhancers_Heart_14643,Enhancers_Heart_14655,Enhancers_Heart_14919,Enhancers_Heart_18073,Enhancers_Heart_21078,Enhancers_Heart_21108,Enhancers_Heart_21114,Enhancers_Heart_21123,Enhancers_Heart_21125,Enhancers_Heart_21141,Enhancers_Heart_22066,Enhancers_Heart_22069,Enhancers_Heart_22072,Enhancers_Heart_22073,Enhancers_Heart_22074,Enhancers_Heart_22091,Enh…
												Enhancers_Heart_11726,Enhancers_Heart_15211,Enhancers_Heart_16324,Enhancers_Heart_18073,Enhancers_Heart_1967,Enhancers_Heart_19978,Enhancers_Heart_19980,Enhancers_Heart_19984,Enhancers_Heart_19985,Enhancers_Heart_19996,Enhancers_Heart_19997,Enhancers_Heart_20007,Enhancers_Heart_20013,Enhancers_Heart_20015,Enhancers_Heart_20023,Enhancers_Heart_20048,Enhancers_Heart_20060,Enhancers_Heart_20064,Enha…
												Enhancers_Heart_10572,Enhancers_Heart_20880,Enhancers_Heart_20881,Enhancers_Heart_20882,Enhancers_Heart_20906,Enhancers_Heart_20908,Enhancers_Heart_20937,Enhancers_Heart_20974,Enhancers_Heart_24086,Enhancers_Heart_24094,Enhancers_Heart_24095,Enhancers_Heart_25292,Enhancers_Heart_28695,Enhancers_Heart_28697,Enhancers_Heart_28698,Enhancers_Heart_29,Enhancers_Heart_29220,Enhancers_Heart_29243,Enhanc…
												Enhancers_Heart_10907,Enhancers_Heart_10909,Enhancers_Heart_10910,Enhancers_Heart_10929,Enhancers_Heart_10930,Enhancers_Heart_10931,Enhancers_Heart_11640,Enhancers_Heart_11641,Enhancers_Heart_12593,Enhancers_Heart_12615,Enhancers_Heart_16884,Enhancers_Heart_16885,Enhancers_Heart_23765,Enhancers_Heart_28695,Enhancers_Heart_28697,Enhancers_Heart_28698,Enhancers_Heart_29061,Enhancers_Heart_29065,Enh…
												Enhancers_Heart_1134,Enhancers_Heart_11533,Enhancers_Heart_11534,Enhancers_Heart_11547,Enhancers_Heart_11551,Enhancers_Heart_15851,Enhancers_Heart_18073,Enhancers_Heart_21078,Enhancers_Heart_21108,Enhancers_Heart_21114,Enhancers_Heart_21123,Enhancers_Heart_21125,Enhancers_Heart_21141,Enhancers_Heart_26153,Enhancers_Heart_26154,Enhancers_Heart_26155,Enhancers_Heart_26156,Enhancers_Heart_26161,Enha…
												Enhancers_Heart_12078,Enhancers_Heart_2660,Enhancers_Heart_26761,Enhancers_Heart_26763,Enhancers_Heart_26764,Enhancers_Heart_26765,Enhancers_Heart_26766,Enhancers_Heart_26769,Enhancers_Heart_26806,Enhancers_Heart_26841,Enhancers_Heart_26856,Enhancers_Heart_26857,Enhancers_Heart_26861,Enhancers_Heart_26886,Enhancers_Heart_26888,Enhancers_Heart_26889,Enhancers_Heart_26893,Enhancers_Heart_26897,Enha…
												Enhancers_Heart_15211,Enhancers_Heart_1967,Enhancers_Heart_19978,Enhancers_Heart_19980,Enhancers_Heart_19984,Enhancers_Heart_19985,Enhancers_Heart_19996,Enhancers_Heart_19997,Enhancers_Heart_20007,Enhancers_Heart_20013,Enhancers_Heart_20015,Enhancers_Heart_20023,Enhancers_Heart_20048,Enhancers_Heart_29220,Enhancers_Heart_29243,Enhancers_Heart_29252,Enhancers_Heart_33738,Enhancers_Heart_62293,Enha…
												Enhancers_Heart_21489,Enhancers_Heart_21545,Enhancers_Heart_21547,Enhancers_Heart_25292,Enhancers_Heart_29220,Enhancers_Heart_29243,Enhancers_Heart_29252,Enhancers_Heart_3385,Enhancers_Heart_3391,Enhancers_Heart_35698,Enhancers_Heart_35707,Enhancers_Heart_37004,Enhancers_Heart_37005,Enhancers_Heart_3799,Enhancers_Heart_3809,Enhancers_Heart_39509,Enhancers_Heart_39969,Enhancers_Heart_41012,Enhance…
												Enhancers_Heart_10907,Enhancers_Heart_10909,Enhancers_Heart_10910,Enhancers_Heart_10929,Enhancers_Heart_10930,Enhancers_Heart_10931,Enhancers_Heart_12078,Enhancers_Heart_12093,Enhancers_Heart_15623,Enhancers_Heart_22185,Enhancers_Heart_22200,Enhancers_Heart_2407,Enhancers_Heart_2411,Enhancers_Heart_2418,Enhancers_Heart_2423,Enhancers_Heart_49167,Enhancers_Heart_49168,Enhancers_Heart_69867,Enhance…
												Enhancers_Heart_10078,Enhancers_Heart_10108,Enhancers_Heart_10949,Enhancers_Heart_10980,Enhancers_Heart_10981,Enhancers_Heart_10983,Enhancers_Heart_11001,Enhancers_Heart_12372,Enhancers_Heart_13290,Enhancers_Heart_13529,Enhancers_Heart_13532,Enhancers_Heart_13533,Enhancers_Heart_13552,Enhancers_Heart_13557,Enhancers_Heart_14676,Enhancers_Heart_14919,Enhancers_Heart_15623,Enhancers_Heart_15729,Enh…
												Enhancers_Heart_10829,Enhancers_Heart_10833,Enhancers_Heart_10864,Enhancers_Heart_10865,Enhancers_Heart_1317,Enhancers_Heart_1318,Enhancers_Heart_1319,Enhancers_Heart_1324,Enhancers_Heart_1327,Enhancers_Heart_14474,Enhancers_Heart_14990,Enhancers_Heart_15232,Enhancers_Heart_18367,Enhancers_Heart_18651,Enhancers_Heart_19874,Enhancers_Heart_19882,Enhancers_Heart_19889,Enhancers_Heart_21915,Enhancer…
												Enhancers_Heart_11001,Enhancers_Heart_1171,Enhancers_Heart_1249,Enhancers_Heart_12622,Enhancers_Heart_12623,Enhancers_Heart_1274,Enhancers_Heart_14284,Enhancers_Heart_14311,Enhancers_Heart_14618,Enhancers_Heart_14640,Enhancers_Heart_14641,Enhancers_Heart_14643,Enhancers_Heart_14655,Enhancers_Heart_14686,Enhancers_Heart_15623,Enhancers_Heart_17084,Enhancers_Heart_18606,Enhancers_Heart_18979,Enhanc…
												Enhancers_Heart_10572,Enhancers_Heart_11640,Enhancers_Heart_11641,Enhancers_Heart_12078,Enhancers_Heart_12593,Enhancers_Heart_12615,Enhancers_Heart_14294,Enhancers_Heart_14686,Enhancers_Heart_202,Enhancers_Heart_21489,Enhancers_Heart_21545,Enhancers_Heart_21547,Enhancers_Heart_21915,Enhancers_Heart_22066,Enhancers_Heart_22069,Enhancers_Heart_22072,Enhancers_Heart_22073,Enhancers_Heart_22074,Enhan…
												Enhancers_Heart_10907,Enhancers_Heart_10909,Enhancers_Heart_10910,Enhancers_Heart_10929,Enhancers_Heart_10930,Enhancers_Heart_10931,Enhancers_Heart_11001,Enhancers_Heart_11533,Enhancers_Heart_11534,Enhancers_Heart_11547,Enhancers_Heart_11551,Enhancers_Heart_12372,Enhancers_Heart_14990,Enhancers_Heart_15046,Enhancers_Heart_15048,Enhancers_Heart_15049,Enhancers_Heart_15055,Enhancers_Heart_15056,Enh…
												Enhancers_Heart_10907,Enhancers_Heart_10909,Enhancers_Heart_10910,Enhancers_Heart_10929,Enhancers_Heart_10930,Enhancers_Heart_10931,Enhancers_Heart_16620,Enhancers_Heart_20479,Enhancers_Heart_24673,Enhancers_Heart_24840,Enhancers_Heart_24891,Enhancers_Heart_26195,Enhancers_Heart_26212,Enhancers_Heart_26213,Enhancers_Heart_26227,Enhancers_Heart_26239,Enhancers_Heart_26247,Enhancers_Heart_26248,Enh…
												Enhancers_Heart_10078,Enhancers_Heart_10108,Enhancers_Heart_10907,Enhancers_Heart_10909,Enhancers_Heart_10910,Enhancers_Heart_10929,Enhancers_Heart_10930,Enhancers_Heart_10931,Enhancers_Heart_12593,Enhancers_Heart_12615,Enhancers_Heart_13290,Enhancers_Heart_13666,Enhancers_Heart_14640,Enhancers_Heart_14641,Enhancers_Heart_14643,Enhancers_Heart_14655,Enhancers_Heart_15169,Enhancers_Heart_15524,Enh…
												Enhancers_Heart_10208,Enhancers_Heart_10572,Enhancers_Heart_10829,Enhancers_Heart_10833,Enhancers_Heart_11640,Enhancers_Heart_11641,Enhancers_Heart_12078,Enhancers_Heart_12593,Enhancers_Heart_12615,Enhancers_Heart_16896,Enhancers_Heart_16911,Enhancers_Heart_17154,Enhancers_Heart_202,Enhancers_Heart_21078,Enhancers_Heart_21108,Enhancers_Heart_21114,Enhancers_Heart_21123,Enhancers_Heart_21125,Enhan…
												Enhancers_Heart_104,Enhancers_Heart_129,Enhancers_Heart_13529,Enhancers_Heart_13532,Enhancers_Heart_13533,Enhancers_Heart_13552,Enhancers_Heart_13557,Enhancers_Heart_14618,Enhancers_Heart_16761,Enhancers_Heart_16764,Enhancers_Heart_16982,Enhancers_Heart_18073,Enhancers_Heart_19158,Enhancers_Heart_24673,Enhancers_Heart_25364,Enhancers_Heart_25489,Enhancers_Heart_28695,Enhancers_Heart_28697,Enhance…
												Enhancers_Heart_10907,Enhancers_Heart_10909,Enhancers_Heart_10910,Enhancers_Heart_10929,Enhancers_Heart_10930,Enhancers_Heart_10931,Enhancers_Heart_11001,Enhancers_Heart_1134,Enhancers_Heart_11533,Enhancers_Heart_11534,Enhancers_Heart_11547,Enhancers_Heart_11551,Enhancers_Heart_11726,Enhancers_Heart_12127,Enhancers_Heart_12593,Enhancers_Heart_12615,Enhancers_Heart_13529,Enhancers_Heart_13532,Enha…
												Enhancers_Heart_10907,Enhancers_Heart_10909,Enhancers_Heart_10910,Enhancers_Heart_10929,Enhancers_Heart_10930,Enhancers_Heart_10931,Enhancers_Heart_12078,Enhancers_Heart_12093,Enhancers_Heart_15623,Enhancers_Heart_16882,Enhancers_Heart_16884,Enhancers_Heart_16885,Enhancers_Heart_21078,Enhancers_Heart_21108,Enhancers_Heart_21114,Enhancers_Heart_21123,Enhancers_Heart_21125,Enhancers_Heart_21141,Enh…
												Enhancers_Heart_10907,Enhancers_Heart_10909,Enhancers_Heart_10910,Enhancers_Heart_10929,Enhancers_Heart_10930,Enhancers_Heart_10931,Enhancers_Heart_16620,Enhancers_Heart_1967,Enhancers_Heart_20479,Enhancers_Heart_24673,Enhancers_Heart_24840,Enhancers_Heart_24891,Enhancers_Heart_26195,Enhancers_Heart_26212,Enhancers_Heart_26213,Enhancers_Heart_26227,Enhancers_Heart_26239,Enhancers_Heart_26247,Enha…
												Enhancers_Heart_10078,Enhancers_Heart_10907,Enhancers_Heart_10909,Enhancers_Heart_10910,Enhancers_Heart_10929,Enhancers_Heart_10930,Enhancers_Heart_10931,Enhancers_Heart_11640,Enhancers_Heart_11641,Enhancers_Heart_13255,Enhancers_Heart_13265,Enhancers_Heart_14919,Enhancers_Heart_15169,Enhancers_Heart_15425,Enhancers_Heart_15430,Enhancers_Heart_15851,Enhancers_Heart_16884,Enhancers_Heart_16885,Enh…
												Enhancers_Heart_10572,Enhancers_Heart_10907,Enhancers_Heart_10909,Enhancers_Heart_10910,Enhancers_Heart_10929,Enhancers_Heart_10930,Enhancers_Heart_10931,Enhancers_Heart_11640,Enhancers_Heart_11641,Enhancers_Heart_12078,Enhancers_Heart_12372,Enhancers_Heart_13255,Enhancers_Heart_13265,Enhancers_Heart_15623,Enhancers_Heart_15813,Enhancers_Heart_16176,Enhancers_Heart_16324,Enhancers_Heart_16761,Enh…
												Enhancers_Heart_10208,Enhancers_Heart_10572,Enhancers_Heart_10829,Enhancers_Heart_10833,Enhancers_Heart_10948,Enhancers_Heart_12127,Enhancers_Heart_12372,Enhancers_Heart_13255,Enhancers_Heart_13265,Enhancers_Heart_15524,Enhancers_Heart_15565,Enhancers_Heart_15570,Enhancers_Heart_15572,Enhancers_Heart_15590,Enhancers_Heart_1673,Enhancers_Heart_1677,Enhancers_Heart_1678,Enhancers_Heart_16896,Enhanc…
												Enhancers_Heart_20790,Enhancers_Heart_22615,Enhancers_Heart_22629,Enhancers_Heart_3548,Enhancers_Heart_3549,Enhancers_Heart_3550,Enhancers_Heart_43827,Enhancers_Heart_43829,Enhancers_Heart_90765,Enhancers_Heart_90768,Enhancers_Heart_90771,Enhancers_Heart_90774,Enhancers_Heart_90787,Enhancers_Heart_90821,Enhancers_Heart_90822,Enhancers_Heart_90823,Enhancers_Heart_90836,Enhancers_Heart_90851
												Enhancers_Heart_10078,Enhancers_Heart_10907,Enhancers_Heart_10909,Enhancers_Heart_10910,Enhancers_Heart_10929,Enhancers_Heart_10930,Enhancers_Heart_10931,Enhancers_Heart_11640,Enhancers_Heart_11641,Enhancers_Heart_13255,Enhancers_Heart_13265,Enhancers_Heart_14919,Enhancers_Heart_15169,Enhancers_Heart_15425,Enhancers_Heart_15430,Enhancers_Heart_15851,Enhancers_Heart_16884,Enhancers_Heart_16885,Enh…
												Enhancers_Heart_10219,Enhancers_Heart_11726,Enhancers_Heart_14919,Enhancers_Heart_19978,Enhancers_Heart_19980,Enhancers_Heart_19984,Enhancers_Heart_19985,Enhancers_Heart_19996,Enhancers_Heart_19997,Enhancers_Heart_20007,Enhancers_Heart_20013,Enhancers_Heart_20015,Enhancers_Heart_20023,Enhancers_Heart_20048,Enhancers_Heart_22066,Enhancers_Heart_22069,Enhancers_Heart_22072,Enhancers_Heart_22073,Enh…
												Enhancers_Heart_11533,Enhancers_Heart_11534,Enhancers_Heart_11547,Enhancers_Heart_11551,Enhancers_Heart_18073,Enhancers_Heart_21078,Enhancers_Heart_21108,Enhancers_Heart_21114,Enhancers_Heart_21123,Enhancers_Heart_21125,Enhancers_Heart_21141,Enhancers_Heart_26153,Enhancers_Heart_26154,Enhancers_Heart_26155,Enhancers_Heart_26156,Enhancers_Heart_26161,Enhancers_Heart_26176,Enhancers_Heart_26195,Enh…
												Enhancers_Heart_10907,Enhancers_Heart_10909,Enhancers_Heart_10910,Enhancers_Heart_10929,Enhancers_Heart_10930,Enhancers_Heart_10931,Enhancers_Heart_12078,Enhancers_Heart_12093,Enhancers_Heart_15623,Enhancers_Heart_16882,Enhancers_Heart_16884,Enhancers_Heart_16885,Enhancers_Heart_17028,Enhancers_Heart_21078,Enhancers_Heart_21108,Enhancers_Heart_21114,Enhancers_Heart_21123,Enhancers_Heart_21125,Enh…
												Enhancers_Heart_104,Enhancers_Heart_10907,Enhancers_Heart_10909,Enhancers_Heart_10910,Enhancers_Heart_10929,Enhancers_Heart_10930,Enhancers_Heart_10931,Enhancers_Heart_11533,Enhancers_Heart_11534,Enhancers_Heart_11547,Enhancers_Heart_11551,Enhancers_Heart_129,Enhancers_Heart_14365,Enhancers_Heart_14919,Enhancers_Heart_14990,Enhancers_Heart_14995,Enhancers_Heart_14997,Enhancers_Heart_16324,Enhance…
												Enhancers_Heart_10907,Enhancers_Heart_10909,Enhancers_Heart_10910,Enhancers_Heart_10929,Enhancers_Heart_10930,Enhancers_Heart_10931,Enhancers_Heart_16620,Enhancers_Heart_1967,Enhancers_Heart_20479,Enhancers_Heart_24673,Enhancers_Heart_24840,Enhancers_Heart_24891,Enhancers_Heart_26195,Enhancers_Heart_26212,Enhancers_Heart_26213,Enhancers_Heart_26227,Enhancers_Heart_26239,Enhancers_Heart_26247,Enha…
												Enhancers_Heart_10078,Enhancers_Heart_10948,Enhancers_Heart_11299,Enhancers_Heart_12078,Enhancers_Heart_12586,Enhancers_Heart_13455,Enhancers_Heart_13464,Enhancers_Heart_13490,Enhancers_Heart_13495,Enhancers_Heart_15382,Enhancers_Heart_15425,Enhancers_Heart_15430,Enhancers_Heart_15729,Enhancers_Heart_15730,Enhancers_Heart_1607,Enhancers_Heart_16176,Enhancers_Heart_16324,Enhancers_Heart_17154,Enha…
												Enhancers_Heart_10907,Enhancers_Heart_10909,Enhancers_Heart_10910,Enhancers_Heart_10929,Enhancers_Heart_10930,Enhancers_Heart_10931,Enhancers_Heart_11726,Enhancers_Heart_14919,Enhancers_Heart_16761,Enhancers_Heart_16764,Enhancers_Heart_1967,Enhancers_Heart_19978,Enhancers_Heart_19980,Enhancers_Heart_19984,Enhancers_Heart_19985,Enhancers_Heart_19996,Enhancers_Heart_19997,Enhancers_Heart_20007,Enha…
												Enhancers_Heart_11533,Enhancers_Heart_11534,Enhancers_Heart_11547,Enhancers_Heart_11551,Enhancers_Heart_18073,Enhancers_Heart_21078,Enhancers_Heart_21108,Enhancers_Heart_21114,Enhancers_Heart_21123,Enhancers_Heart_21125,Enhancers_Heart_21141,Enhancers_Heart_26153,Enhancers_Heart_26154,Enhancers_Heart_26155,Enhancers_Heart_26156,Enhancers_Heart_26161,Enhancers_Heart_26176,Enhancers_Heart_26195,Enh…
												Enhancers_Heart_12593,Enhancers_Heart_12615,Enhancers_Heart_26195,Enhancers_Heart_26212,Enhancers_Heart_26213,Enhancers_Heart_26227,Enhancers_Heart_26239,Enhancers_Heart_26247,Enhancers_Heart_26248,Enhancers_Heart_29948,Enhancers_Heart_29958,Enhancers_Heart_73166,Enhancers_Heart_73170,Enhancers_Heart_73173,Enhancers_Heart_93500,Enhancers_Heart_93525,Enhancers_Heart_93548,Enhancers_Heart_93564,Enh…
												Enhancers_Heart_10907,Enhancers_Heart_10909,Enhancers_Heart_10910,Enhancers_Heart_10929,Enhancers_Heart_10930,Enhancers_Heart_10931,Enhancers_Heart_11640,Enhancers_Heart_11641,Enhancers_Heart_12372,Enhancers_Heart_12593,Enhancers_Heart_12615,Enhancers_Heart_13719,Enhancers_Heart_16176,Enhancers_Heart_16761,Enhancers_Heart_16764,Enhancers_Heart_17154,Enhancers_Heart_17696,Enhancers_Heart_18011,Enh…
												Enhancers_Heart_20060,Enhancers_Heart_20064,Enhancers_Heart_20085,Enhancers_Heart_26195,Enhancers_Heart_26212,Enhancers_Heart_26213,Enhancers_Heart_26227,Enhancers_Heart_26239,Enhancers_Heart_26247,Enhancers_Heart_26248,Enhancers_Heart_45986,Enhancers_Heart_45991,Enhancers_Heart_45994,Enhancers_Heart_46013,Enhancers_Heart_62327,Enhancers_Heart_6563,Enhancers_Heart_6575,Enhancers_Heart_6582,Enhanc…
												Enhancers_Heart_10829,Enhancers_Heart_10833,Enhancers_Heart_12078,Enhancers_Heart_17154,Enhancers_Heart_22603,Enhancers_Heart_22604,Enhancers_Heart_22615,Enhancers_Heart_22629,Enhancers_Heart_23765,Enhancers_Heart_2660,Enhancers_Heart_26761,Enhancers_Heart_26763,Enhancers_Heart_26764,Enhancers_Heart_26765,Enhancers_Heart_26766,Enhancers_Heart_26769,Enhancers_Heart_26806,Enhancers_Heart_26841,Enha…
												Enhancers_Heart_20085,Enhancers_Heart_28265,Enhancers_Heart_28271,Enhancers_Heart_28291,Enhancers_Heart_28292,Enhancers_Heart_43047,Enhancers_Heart_43058,Enhancers_Heart_43069,Enhancers_Heart_43103,Enhancers_Heart_43104,Enhancers_Heart_43122,Enhancers_Heart_43124,Enhancers_Heart_43138,Enhancers_Heart_44099,Enhancers_Heart_44103,Enhancers_Heart_44108,Enhancers_Heart_44111,Enhancers_Heart_49992,Enh…
												Enhancers_Heart_13529,Enhancers_Heart_13532,Enhancers_Heart_13533,Enhancers_Heart_13552,Enhancers_Heart_13557,Enhancers_Heart_1607,Enhancers_Heart_16438,Enhancers_Heart_22111,Enhancers_Heart_22115,Enhancers_Heart_22118,Enhancers_Heart_22378,Enhancers_Heart_22380,Enhancers_Heart_22381,Enhancers_Heart_22920,Enhancers_Heart_30498,Enhancers_Heart_30499,Enhancers_Heart_30501,Enhancers_Heart_35291,Enha…
												Enhancers_Heart_10907,Enhancers_Heart_10909,Enhancers_Heart_10910,Enhancers_Heart_10929,Enhancers_Heart_10930,Enhancers_Heart_10931,Enhancers_Heart_12078,Enhancers_Heart_12354,Enhancers_Heart_14919,Enhancers_Heart_16324,Enhancers_Heart_17696,Enhancers_Heart_1877,Enhancers_Heart_1967,Enhancers_Heart_19882,Enhancers_Heart_19889,Enhancers_Heart_21078,Enhancers_Heart_21108,Enhancers_Heart_21114,Enhan…
												Enhancers_Heart_10948,Enhancers_Heart_11640,Enhancers_Heart_11641,Enhancers_Heart_12372,Enhancers_Heart_14990,Enhancers_Heart_17028,Enhancers_Heart_18367,Enhancers_Heart_19404,Enhancers_Heart_19406,Enhancers_Heart_19432,Enhancers_Heart_19434,Enhancers_Heart_19438,Enhancers_Heart_21915,Enhancers_Heart_2264,Enhancers_Heart_2274,Enhancers_Heart_2294,Enhancers_Heart_2300,Enhancers_Heart_2301,Enhancer…
												Enhancers_Heart_10907,Enhancers_Heart_10909,Enhancers_Heart_10910,Enhancers_Heart_10929,Enhancers_Heart_10930,Enhancers_Heart_10931,Enhancers_Heart_12078,Enhancers_Heart_13255,Enhancers_Heart_13265,Enhancers_Heart_16324,Enhancers_Heart_16884,Enhancers_Heart_16885,Enhancers_Heart_18073,Enhancers_Heart_19615,Enhancers_Heart_19616,Enhancers_Heart_19874,Enhancers_Heart_19882,Enhancers_Heart_19889,Enh…
												Enhancers_Heart_10219,Enhancers_Heart_10907,Enhancers_Heart_10909,Enhancers_Heart_10910,Enhancers_Heart_10929,Enhancers_Heart_10930,Enhancers_Heart_10931,Enhancers_Heart_1134,Enhancers_Heart_12078,Enhancers_Heart_17154,Enhancers_Heart_19404,Enhancers_Heart_19406,Enhancers_Heart_19432,Enhancers_Heart_19434,Enhancers_Heart_19438,Enhancers_Heart_22370,Enhancers_Heart_25620,Enhancers_Heart_25625,Enha…
												Enhancers_Heart_11533,Enhancers_Heart_11534,Enhancers_Heart_11547,Enhancers_Heart_11551,Enhancers_Heart_18073,Enhancers_Heart_21078,Enhancers_Heart_21108,Enhancers_Heart_21114,Enhancers_Heart_21123,Enhancers_Heart_21125,Enhancers_Heart_21141,Enhancers_Heart_26153,Enhancers_Heart_26154,Enhancers_Heart_26155,Enhancers_Heart_26156,Enhancers_Heart_26161,Enhancers_Heart_26176,Enhancers_Heart_26195,Enh…
												Enhancers_Heart_11001,Enhancers_Heart_1171,Enhancers_Heart_1249,Enhancers_Heart_1274,Enhancers_Heart_14311,Enhancers_Heart_14618,Enhancers_Heart_14640,Enhancers_Heart_14641,Enhancers_Heart_14643,Enhancers_Heart_14655,Enhancers_Heart_14686,Enhancers_Heart_17084,Enhancers_Heart_18606,Enhancers_Heart_18979,Enhancers_Heart_19404,Enhancers_Heart_19406,Enhancers_Heart_19432,Enhancers_Heart_19434,Enhanc…
												Enhancers_Heart_10907,Enhancers_Heart_10909,Enhancers_Heart_10910,Enhancers_Heart_10929,Enhancers_Heart_10930,Enhancers_Heart_10931,Enhancers_Heart_11001,Enhancers_Heart_11533,Enhancers_Heart_11534,Enhancers_Heart_11547,Enhancers_Heart_11551,Enhancers_Heart_12372,Enhancers_Heart_14990,Enhancers_Heart_15046,Enhancers_Heart_15048,Enhancers_Heart_15049,Enhancers_Heart_15055,Enhancers_Heart_15056,Enh…
												Enhancers_Heart_10907,Enhancers_Heart_10909,Enhancers_Heart_10910,Enhancers_Heart_10929,Enhancers_Heart_10930,Enhancers_Heart_10931,Enhancers_Heart_12127,Enhancers_Heart_12372,Enhancers_Heart_13195,Enhancers_Heart_13202,Enhancers_Heart_13255,Enhancers_Heart_13265,Enhancers_Heart_13529,Enhancers_Heart_13532,Enhancers_Heart_13533,Enhancers_Heart_13552,Enhancers_Heart_13557,Enhancers_Heart_15211,Enh…
												Enhancers_Heart_10219,Enhancers_Heart_10907,Enhancers_Heart_10909,Enhancers_Heart_10910,Enhancers_Heart_10929,Enhancers_Heart_10930,Enhancers_Heart_10931,Enhancers_Heart_10948,Enhancers_Heart_11001,Enhancers_Heart_11533,Enhancers_Heart_11534,Enhancers_Heart_11547,Enhancers_Heart_11551,Enhancers_Heart_12078,Enhancers_Heart_13255,Enhancers_Heart_13265,Enhancers_Heart_13424,Enhancers_Heart_13431,Enh…
												Enhancers_Heart_10108,Enhancers_Heart_32896,Enhancers_Heart_32901,Enhancers_Heart_32931,Enhancers_Heart_32932,Enhancers_Heart_32952,Enhancers_Heart_41012,Enhancers_Heart_41047,Enhancers_Heart_45131,Enhancers_Heart_45138,Enhancers_Heart_45147,Enhancers_Heart_45159,Enhancers_Heart_45181,Enhancers_Heart_53829,Enhancers_Heart_62689,Enhancers_Heart_62690,Enhancers_Heart_62692,Enhancers_Heart_62698,Enh…
												Enhancers_Heart_24086,Enhancers_Heart_24094,Enhancers_Heart_24095,Enhancers_Heart_25292,Enhancers_Heart_28695,Enhancers_Heart_28697,Enhancers_Heart_28698,Enhancers_Heart_29,Enhancers_Heart_29220,Enhancers_Heart_29243,Enhancers_Heart_29252,Enhancers_Heart_29820,Enhancers_Heart_30210,Enhancers_Heart_30948,Enhancers_Heart_30950,Enhancers_Heart_32553,Enhancers_Heart_32570,Enhancers_Heart_34853,Enhanc…
												Enhancers_Heart_10078,Enhancers_Heart_10108,Enhancers_Heart_10219,Enhancers_Heart_10907,Enhancers_Heart_10909,Enhancers_Heart_10910,Enhancers_Heart_10929,Enhancers_Heart_10930,Enhancers_Heart_10931,Enhancers_Heart_10948,Enhancers_Heart_11640,Enhancers_Heart_11641,Enhancers_Heart_12354,Enhancers_Heart_12372,Enhancers_Heart_12593,Enhancers_Heart_12615,Enhancers_Heart_13075,Enhancers_Heart_13080,Enh…
												Enhancers_Heart_10572,Enhancers_Heart_12372,Enhancers_Heart_14466,Enhancers_Heart_14919,Enhancers_Heart_15933,Enhancers_Heart_16761,Enhancers_Heart_16764,Enhancers_Heart_16884,Enhancers_Heart_16885,Enhancers_Heart_19615,Enhancers_Heart_19616,Enhancers_Heart_20863,Enhancers_Heart_21408,Enhancers_Heart_22066,Enhancers_Heart_22069,Enhancers_Heart_22072,Enhancers_Heart_22073,Enhancers_Heart_22074,Enh…
												Enhancers_Heart_11533,Enhancers_Heart_11534,Enhancers_Heart_11547,Enhancers_Heart_11551,Enhancers_Heart_14365,Enhancers_Heart_14919,Enhancers_Heart_17274,Enhancers_Heart_17672,Enhancers_Heart_18039,Enhancers_Heart_18045,Enhancers_Heart_18046,Enhancers_Heart_18049,Enhancers_Heart_18057,Enhancers_Heart_18058,Enhancers_Heart_18073,Enhancers_Heart_20291,Enhancers_Heart_20305,Enhancers_Heart_20479,Enh…
												Enhancers_Heart_12127,Enhancers_Heart_12354,Enhancers_Heart_14213,Enhancers_Heart_14474,Enhancers_Heart_16761,Enhancers_Heart_16764,Enhancers_Heart_21915,Enhancers_Heart_25909,Enhancers_Heart_36123,Enhancers_Heart_36133,Enhancers_Heart_52180,Enhancers_Heart_56520,Enhancers_Heart_56521,Enhancers_Heart_56522,Enhancers_Heart_58141,Enhancers_Heart_58146,Enhancers_Heart_58147,Enhancers_Heart_58153,Enh…
												Enhancers_Heart_10572,Enhancers_Heart_10907,Enhancers_Heart_10909,Enhancers_Heart_10910,Enhancers_Heart_10929,Enhancers_Heart_10930,Enhancers_Heart_10931,Enhancers_Heart_12078,Enhancers_Heart_12127,Enhancers_Heart_12354,Enhancers_Heart_12593,Enhancers_Heart_12615,Enhancers_Heart_14213,Enhancers_Heart_14474,Enhancers_Heart_14919,Enhancers_Heart_16761,Enhancers_Heart_16764,Enhancers_Heart_21915,Enh…
												Enhancers_Heart_10907,Enhancers_Heart_10909,Enhancers_Heart_10910,Enhancers_Heart_10929,Enhancers_Heart_10930,Enhancers_Heart_10931,Enhancers_Heart_17274,Enhancers_Heart_19615,Enhancers_Heart_19616,Enhancers_Heart_19978,Enhancers_Heart_19980,Enhancers_Heart_19984,Enhancers_Heart_19985,Enhancers_Heart_19996,Enhancers_Heart_19997,Enhancers_Heart_20007,Enhancers_Heart_20013,Enhancers_Heart_20015,Enh…
												Enhancers_Heart_10078,Enhancers_Heart_10108,Enhancers_Heart_10829,Enhancers_Heart_10833,Enhancers_Heart_10907,Enhancers_Heart_10909,Enhancers_Heart_10910,Enhancers_Heart_10929,Enhancers_Heart_10930,Enhancers_Heart_10931,Enhancers_Heart_11640,Enhancers_Heart_11641,Enhancers_Heart_12078,Enhancers_Heart_13075,Enhancers_Heart_13080,Enhancers_Heart_15729,Enhancers_Heart_15730,Enhancers_Heart_16176,Enh…
												Enhancers_Heart_10907,Enhancers_Heart_10909,Enhancers_Heart_10910,Enhancers_Heart_10929,Enhancers_Heart_10930,Enhancers_Heart_10931,Enhancers_Heart_12078,Enhancers_Heart_12093,Enhancers_Heart_15623,Enhancers_Heart_22185,Enhancers_Heart_22200,Enhancers_Heart_2407,Enhancers_Heart_2411,Enhancers_Heart_2418,Enhancers_Heart_2423,Enhancers_Heart_33237,Enhancers_Heart_33239,Enhancers_Heart_49167,Enhance…
												Enhancers_Heart_10572,Enhancers_Heart_11640,Enhancers_Heart_11641,Enhancers_Heart_12078,Enhancers_Heart_12593,Enhancers_Heart_12615,Enhancers_Heart_202,Enhancers_Heart_21489,Enhancers_Heart_21545,Enhancers_Heart_21547,Enhancers_Heart_22066,Enhancers_Heart_22069,Enhancers_Heart_22072,Enhancers_Heart_22073,Enhancers_Heart_22074,Enhancers_Heart_22091,Enhancers_Heart_22603,Enhancers_Heart_22604,Enhan…
												Enhancers_Heart_10907,Enhancers_Heart_10909,Enhancers_Heart_10910,Enhancers_Heart_10929,Enhancers_Heart_10930,Enhancers_Heart_10931,Enhancers_Heart_17696,Enhancers_Heart_1967,Enhancers_Heart_19882,Enhancers_Heart_19889,Enhancers_Heart_21078,Enhancers_Heart_21108,Enhancers_Heart_21114,Enhancers_Heart_21123,Enhancers_Heart_21125,Enhancers_Heart_21141,Enhancers_Heart_24673,Enhancers_Heart_29061,Enha…
												Enhancers_Heart_10907,Enhancers_Heart_10909,Enhancers_Heart_10910,Enhancers_Heart_10929,Enhancers_Heart_10930,Enhancers_Heart_10931,Enhancers_Heart_12372,Enhancers_Heart_14919,Enhancers_Heart_1967,Enhancers_Heart_20291,Enhancers_Heart_20305,Enhancers_Heart_26195,Enhancers_Heart_26212,Enhancers_Heart_26213,Enhancers_Heart_26227,Enhancers_Heart_26239,Enhancers_Heart_26247,Enhancers_Heart_26248,Enha…
												Enhancers_Heart_25292,Enhancers_Heart_29220,Enhancers_Heart_29243,Enhancers_Heart_29252,Enhancers_Heart_3385,Enhancers_Heart_3391,Enhancers_Heart_37004,Enhancers_Heart_37005,Enhancers_Heart_39509,Enhancers_Heart_39969,Enhancers_Heart_41012,Enhancers_Heart_41047,Enhancers_Heart_42152,Enhancers_Heart_42158,Enhancers_Heart_42159,Enhancers_Heart_42160,Enhancers_Heart_42161,Enhancers_Heart_42163,Enhan…
												Enhancers_Heart_10907,Enhancers_Heart_10909,Enhancers_Heart_10910,Enhancers_Heart_10929,Enhancers_Heart_10930,Enhancers_Heart_10931,Enhancers_Heart_16620,Enhancers_Heart_1967,Enhancers_Heart_20479,Enhancers_Heart_24673,Enhancers_Heart_24840,Enhancers_Heart_24891,Enhancers_Heart_26195,Enhancers_Heart_26212,Enhancers_Heart_26213,Enhancers_Heart_26227,Enhancers_Heart_26239,Enhancers_Heart_26247,Enha…
												Enhancers_Heart_11001,Enhancers_Heart_1171,Enhancers_Heart_1249,Enhancers_Heart_12622,Enhancers_Heart_12623,Enhancers_Heart_1274,Enhancers_Heart_14618,Enhancers_Heart_14686,Enhancers_Heart_15623,Enhancers_Heart_17084,Enhancers_Heart_18606,Enhancers_Heart_18979,Enhancers_Heart_19404,Enhancers_Heart_19406,Enhancers_Heart_19432,Enhancers_Heart_19434,Enhancers_Heart_19438,Enhancers_Heart_19874,Enhanc…
												Enhancers_Heart_10907,Enhancers_Heart_10909,Enhancers_Heart_10910,Enhancers_Heart_10929,Enhancers_Heart_10930,Enhancers_Heart_10931,Enhancers_Heart_19615,Enhancers_Heart_19616,Enhancers_Heart_19978,Enhancers_Heart_19980,Enhancers_Heart_19984,Enhancers_Heart_19985,Enhancers_Heart_19996,Enhancers_Heart_19997,Enhancers_Heart_20007,Enhancers_Heart_20013,Enhancers_Heart_20015,Enhancers_Heart_20023,Enh…
												Enhancers_Heart_10907,Enhancers_Heart_10909,Enhancers_Heart_10910,Enhancers_Heart_10929,Enhancers_Heart_10930,Enhancers_Heart_10931,Enhancers_Heart_16324,Enhancers_Heart_17274,Enhancers_Heart_19615,Enhancers_Heart_19616,Enhancers_Heart_19874,Enhancers_Heart_19882,Enhancers_Heart_19889,Enhancers_Heart_19978,Enhancers_Heart_19980,Enhancers_Heart_19984,Enhancers_Heart_19985,Enhancers_Heart_19996,Enh…
												Enhancers_Heart_1607,Enhancers_Heart_20705,Enhancers_Heart_26806,Enhancers_Heart_26841,Enhancers_Heart_26856,Enhancers_Heart_26857,Enhancers_Heart_26861,Enhancers_Heart_26886,Enhancers_Heart_26888,Enhancers_Heart_26889,Enhancers_Heart_26893,Enhancers_Heart_26897,Enhancers_Heart_26899,Enhancers_Heart_3548,Enhancers_Heart_3549,Enhancers_Heart_3550,Enhancers_Heart_36334,Enhancers_Heart_36563,Enhance…
												Enhancers_Heart_10829,Enhancers_Heart_10833,Enhancers_Heart_12078,Enhancers_Heart_17154,Enhancers_Heart_22603,Enhancers_Heart_22604,Enhancers_Heart_22615,Enhancers_Heart_22629,Enhancers_Heart_23765,Enhancers_Heart_2660,Enhancers_Heart_26761,Enhancers_Heart_26763,Enhancers_Heart_26764,Enhancers_Heart_26765,Enhancers_Heart_26766,Enhancers_Heart_26769,Enhancers_Heart_26806,Enhancers_Heart_26841,Enha…
												Enhancers_Heart_14640,Enhancers_Heart_14641,Enhancers_Heart_14643,Enhancers_Heart_14655,Enhancers_Heart_14919,Enhancers_Heart_21078,Enhancers_Heart_21108,Enhancers_Heart_21114,Enhancers_Heart_21123,Enhancers_Heart_21125,Enhancers_Heart_21141,Enhancers_Heart_22066,Enhancers_Heart_22069,Enhancers_Heart_22072,Enhancers_Heart_22073,Enhancers_Heart_22074,Enhancers_Heart_22091,Enhancers_Heart_29061,Enh…
												Enhancers_Heart_22200,Enhancers_Heart_41012,Enhancers_Heart_41047,Enhancers_Heart_46416,Enhancers_Heart_46417,Enhancers_Heart_46421,Enhancers_Heart_46427,Enhancers_Heart_46428,Enhancers_Heart_46432,Enhancers_Heart_46436,Enhancers_Heart_46457,Enhancers_Heart_46458,Enhancers_Heart_46460,Enhancers_Heart_68017,Enhancers_Heart_68019,Enhancers_Heart_87298
												Enhancers_Heart_10078,Enhancers_Heart_10108,Enhancers_Heart_10949,Enhancers_Heart_12372,Enhancers_Heart_13290,Enhancers_Heart_13529,Enhancers_Heart_13532,Enhancers_Heart_13533,Enhancers_Heart_13552,Enhancers_Heart_13557,Enhancers_Heart_14919,Enhancers_Heart_15623,Enhancers_Heart_15813,Enhancers_Heart_1607,Enhancers_Heart_16324,Enhancers_Heart_16438,Enhancers_Heart_17274,Enhancers_Heart_18039,Enha…
												Enhancers_Heart_12078,Enhancers_Heart_14990,Enhancers_Heart_15169,Enhancers_Heart_15590,Enhancers_Heart_16361,Enhancers_Heart_18039,Enhancers_Heart_18045,Enhancers_Heart_18046,Enhancers_Heart_18049,Enhancers_Heart_18057,Enhancers_Heart_18058,Enhancers_Heart_19874,Enhancers_Heart_19882,Enhancers_Heart_19889,Enhancers_Heart_20060,Enhancers_Heart_20064,Enhancers_Heart_20085,Enhancers_Heart_20111,Enh…
												Enhancers_Heart_22111,Enhancers_Heart_22115,Enhancers_Heart_22118,Enhancers_Heart_29155,Enhancers_Heart_29158,Enhancers_Heart_29161,Enhancers_Heart_31270,Enhancers_Heart_31271,Enhancers_Heart_31272,Enhancers_Heart_47230,Enhancers_Heart_53870,Enhancers_Heart_56735,Enhancers_Heart_6563,Enhancers_Heart_6575,Enhancers_Heart_6582,Enhancers_Heart_6585,Enhancers_Heart_80718,Enhancers_Heart_80719,Enhance…
												Enhancers_Heart_26195,Enhancers_Heart_26212,Enhancers_Heart_26213,Enhancers_Heart_26227,Enhancers_Heart_26239,Enhancers_Heart_26247,Enhancers_Heart_26248,Enhancers_Heart_29581,Enhancers_Heart_29948,Enhancers_Heart_29958,Enhancers_Heart_59270,Enhancers_Heart_59274,Enhancers_Heart_59275,Enhancers_Heart_62436,Enhancers_Heart_62444,Enhancers_Heart_62463,Enhancers_Heart_68289,Enhancers_Heart_77259,Enh…
												Enhancers_Heart_11001,Enhancers_Heart_1171,Enhancers_Heart_1249,Enhancers_Heart_1274,Enhancers_Heart_14618,Enhancers_Heart_14686,Enhancers_Heart_17084,Enhancers_Heart_18606,Enhancers_Heart_18979,Enhancers_Heart_19874,Enhancers_Heart_19882,Enhancers_Heart_19889,Enhancers_Heart_20183,Enhancers_Heart_20204,Enhancers_Heart_21442,Enhancers_Heart_21443,Enhancers_Heart_22502,Enhancers_Heart_22546,Enhanc…
												Enhancers_Heart_26195,Enhancers_Heart_26212,Enhancers_Heart_26213,Enhancers_Heart_26227,Enhancers_Heart_26239,Enhancers_Heart_26247,Enhancers_Heart_26248,Enhancers_Heart_45986,Enhancers_Heart_45991,Enhancers_Heart_45994,Enhancers_Heart_46013,Enhancers_Heart_62327,Enhancers_Heart_93500,Enhancers_Heart_93525,Enhancers_Heart_93548,Enhancers_Heart_93564,Enhancers_Heart_93579
												Enhancers_Heart_10907,Enhancers_Heart_10909,Enhancers_Heart_10910,Enhancers_Heart_10929,Enhancers_Heart_10930,Enhancers_Heart_10931,Enhancers_Heart_12078,Enhancers_Heart_12354,Enhancers_Heart_14919,Enhancers_Heart_17696,Enhancers_Heart_1967,Enhancers_Heart_19882,Enhancers_Heart_19889,Enhancers_Heart_21078,Enhancers_Heart_21108,Enhancers_Heart_21114,Enhancers_Heart_21123,Enhancers_Heart_21125,Enha…
												Enhancers_Heart_10907,Enhancers_Heart_10909,Enhancers_Heart_10910,Enhancers_Heart_10929,Enhancers_Heart_10930,Enhancers_Heart_10931,Enhancers_Heart_12078,Enhancers_Heart_14919,Enhancers_Heart_17696,Enhancers_Heart_1967,Enhancers_Heart_19882,Enhancers_Heart_19889,Enhancers_Heart_21078,Enhancers_Heart_21108,Enhancers_Heart_21114,Enhancers_Heart_21123,Enhancers_Heart_21125,Enhancers_Heart_21141,Enha…
												Enhancers_Heart_13529,Enhancers_Heart_13532,Enhancers_Heart_13533,Enhancers_Heart_13552,Enhancers_Heart_13557,Enhancers_Heart_15623,Enhancers_Heart_1607,Enhancers_Heart_16438,Enhancers_Heart_22111,Enhancers_Heart_22115,Enhancers_Heart_22118,Enhancers_Heart_22378,Enhancers_Heart_22380,Enhancers_Heart_22381,Enhancers_Heart_22920,Enhancers_Heart_24673,Enhancers_Heart_26195,Enhancers_Heart_26212,Enha…
												Enhancers_Heart_10208,Enhancers_Heart_10572,Enhancers_Heart_10829,Enhancers_Heart_10833,Enhancers_Heart_11640,Enhancers_Heart_11641,Enhancers_Heart_12078,Enhancers_Heart_12593,Enhancers_Heart_12615,Enhancers_Heart_13195,Enhancers_Heart_13202,Enhancers_Heart_14294,Enhancers_Heart_14311,Enhancers_Heart_14686,Enhancers_Heart_16896,Enhancers_Heart_16911,Enhancers_Heart_17154,Enhancers_Heart_19615,Enh…
												Enhancers_Heart_10907,Enhancers_Heart_10909,Enhancers_Heart_10910,Enhancers_Heart_10929,Enhancers_Heart_10930,Enhancers_Heart_10931,Enhancers_Heart_12078,Enhancers_Heart_12093,Enhancers_Heart_13168,Enhancers_Heart_15623,Enhancers_Heart_22185,Enhancers_Heart_22200,Enhancers_Heart_2407,Enhancers_Heart_2411,Enhancers_Heart_2418,Enhancers_Heart_2423,Enhancers_Heart_2576,Enhancers_Heart_25789,Enhancer…
												Enhancers_Heart_10907,Enhancers_Heart_10909,Enhancers_Heart_10910,Enhancers_Heart_10929,Enhancers_Heart_10930,Enhancers_Heart_10931,Enhancers_Heart_12078,Enhancers_Heart_12372,Enhancers_Heart_1319,Enhancers_Heart_1324,Enhancers_Heart_1327,Enhancers_Heart_14213,Enhancers_Heart_14919,Enhancers_Heart_1607,Enhancers_Heart_20880,Enhancers_Heart_20881,Enhancers_Heart_20882,Enhancers_Heart_20906,Enhance…
												Enhancers_Heart_10078,Enhancers_Heart_10108,Enhancers_Heart_10698,Enhancers_Heart_10710,Enhancers_Heart_10729,Enhancers_Heart_10829,Enhancers_Heart_10833,Enhancers_Heart_10864,Enhancers_Heart_10865,Enhancers_Heart_10907,Enhancers_Heart_10909,Enhancers_Heart_10910,Enhancers_Heart_10929,Enhancers_Heart_10930,Enhancers_Heart_10931,Enhancers_Heart_10948,Enhancers_Heart_11299,Enhancers_Heart_12078,Enh…
												Enhancers_Heart_10208,Enhancers_Heart_1078,Enhancers_Heart_10829,Enhancers_Heart_10833,Enhancers_Heart_1087,Enhancers_Heart_11299,Enhancers_Heart_12127,Enhancers_Heart_12333,Enhancers_Heart_13455,Enhancers_Heart_13464,Enhancers_Heart_13490,Enhancers_Heart_13495,Enhancers_Heart_13666,Enhancers_Heart_15169,Enhancers_Heart_16074,Enhancers_Heart_16108,Enhancers_Heart_16176,Enhancers_Heart_19608,Enhan…
												Enhancers_Heart_22111,Enhancers_Heart_22115,Enhancers_Heart_22118,Enhancers_Heart_23765,Enhancers_Heart_45873,Enhancers_Heart_45901,Enhancers_Heart_6563,Enhancers_Heart_6575,Enhancers_Heart_6582,Enhancers_Heart_6585,Enhancers_Heart_7167,Enhancers_Heart_7169,Enhancers_Heart_7170,Enhancers_Heart_7173,Enhancers_Heart_7174,Enhancers_Heart_7207,Enhancers_Heart_7208,Enhancers_Heart_97246
												Enhancers_Heart_15211,Enhancers_Heart_16324,Enhancers_Heart_19978,Enhancers_Heart_19980,Enhancers_Heart_19984,Enhancers_Heart_19985,Enhancers_Heart_19996,Enhancers_Heart_19997,Enhancers_Heart_20007,Enhancers_Heart_20013,Enhancers_Heart_20015,Enhancers_Heart_20023,Enhancers_Heart_20048,Enhancers_Heart_29061,Enhancers_Heart_29065,Enhancers_Heart_29084,Enhancers_Heart_29220,Enhancers_Heart_29243,Enh…
												Enhancers_Heart_10208,Enhancers_Heart_10572,Enhancers_Heart_12127,Enhancers_Heart_12354,Enhancers_Heart_14919,Enhancers_Heart_16438,Enhancers_Heart_17274,Enhancers_Heart_20405,Enhancers_Heart_21078,Enhancers_Heart_21108,Enhancers_Heart_21114,Enhancers_Heart_21123,Enhancers_Heart_21125,Enhancers_Heart_21141,Enhancers_Heart_21390,Enhancers_Heart_21402,Enhancers_Heart_22603,Enhancers_Heart_22604,Enh…
												Enhancers_Heart_13529,Enhancers_Heart_13532,Enhancers_Heart_13533,Enhancers_Heart_13552,Enhancers_Heart_13557,Enhancers_Heart_1607,Enhancers_Heart_16438,Enhancers_Heart_22111,Enhancers_Heart_22115,Enhancers_Heart_22118,Enhancers_Heart_22378,Enhancers_Heart_22380,Enhancers_Heart_22381,Enhancers_Heart_22920,Enhancers_Heart_30498,Enhancers_Heart_30499,Enhancers_Heart_30501,Enhancers_Heart_35291,Enha…
												Enhancers_Heart_12372,Enhancers_Heart_1319,Enhancers_Heart_1324,Enhancers_Heart_1327,Enhancers_Heart_14213,Enhancers_Heart_14686,Enhancers_Heart_15382,Enhancers_Heart_16761,Enhancers_Heart_16764,Enhancers_Heart_20880,Enhancers_Heart_20881,Enhancers_Heart_20882,Enhancers_Heart_20906,Enhancers_Heart_20908,Enhancers_Heart_20937,Enhancers_Heart_20974,Enhancers_Heart_21915,Enhancers_Heart_24891,Enhanc…
												Enhancers_Heart_10219,Enhancers_Heart_10948,Enhancers_Heart_11533,Enhancers_Heart_11534,Enhancers_Heart_11547,Enhancers_Heart_11551,Enhancers_Heart_11691,Enhancers_Heart_11692,Enhancers_Heart_11696,Enhancers_Heart_11698,Enhancers_Heart_11699,Enhancers_Heart_11717,Enhancers_Heart_12078,Enhancers_Heart_13424,Enhancers_Heart_13431,Enhancers_Heart_14365,Enhancers_Heart_14990,Enhancers_Heart_15382,Enh…
												Enhancers_Heart_10948,Enhancers_Heart_11640,Enhancers_Heart_11641,Enhancers_Heart_12372,Enhancers_Heart_14990,Enhancers_Heart_17028,Enhancers_Heart_18367,Enhancers_Heart_19404,Enhancers_Heart_19406,Enhancers_Heart_19432,Enhancers_Heart_19434,Enhancers_Heart_19438,Enhancers_Heart_21915,Enhancers_Heart_2264,Enhancers_Heart_2274,Enhancers_Heart_2294,Enhancers_Heart_2300,Enhancers_Heart_2301,Enhancer…
												Enhancers_Heart_10108,Enhancers_Heart_11001,Enhancers_Heart_13075,Enhancers_Heart_13080,Enhancers_Heart_14474,Enhancers_Heart_15623,Enhancers_Heart_15787,Enhancers_Heart_16176,Enhancers_Heart_16240,Enhancers_Heart_16245,Enhancers_Heart_16247,Enhancers_Heart_16254,Enhancers_Heart_16256,Enhancers_Heart_17028,Enhancers_Heart_17134,Enhancers_Heart_17274,Enhancers_Heart_18073,Enhancers_Heart_18979,Enh…
												Enhancers_Heart_10907,Enhancers_Heart_10909,Enhancers_Heart_10910,Enhancers_Heart_10929,Enhancers_Heart_10930,Enhancers_Heart_10931,Enhancers_Heart_16620,Enhancers_Heart_1967,Enhancers_Heart_20479,Enhancers_Heart_24673,Enhancers_Heart_24840,Enhancers_Heart_24891,Enhancers_Heart_26195,Enhancers_Heart_26212,Enhancers_Heart_26213,Enhancers_Heart_26227,Enhancers_Heart_26239,Enhancers_Heart_26247,Enha…
												Enhancers_Heart_10907,Enhancers_Heart_10909,Enhancers_Heart_10910,Enhancers_Heart_10929,Enhancers_Heart_10930,Enhancers_Heart_10931,Enhancers_Heart_12078,Enhancers_Heart_12093,Enhancers_Heart_15623,Enhancers_Heart_22185,Enhancers_Heart_22200,Enhancers_Heart_2407,Enhancers_Heart_2411,Enhancers_Heart_2418,Enhancers_Heart_2423,Enhancers_Heart_49167,Enhancers_Heart_49168,Enhancers_Heart_69867,Enhance…
												Enhancers_Heart_10907,Enhancers_Heart_10909,Enhancers_Heart_10910,Enhancers_Heart_10929,Enhancers_Heart_10930,Enhancers_Heart_10931,Enhancers_Heart_11533,Enhancers_Heart_11534,Enhancers_Heart_11547,Enhancers_Heart_11551,Enhancers_Heart_18073,Enhancers_Heart_21078,Enhancers_Heart_21108,Enhancers_Heart_21114,Enhancers_Heart_21123,Enhancers_Heart_21125,Enhancers_Heart_21141,Enhancers_Heart_26153,Enh…
												Enhancers_Heart_10907,Enhancers_Heart_10909,Enhancers_Heart_10910,Enhancers_Heart_10929,Enhancers_Heart_10930,Enhancers_Heart_10931,Enhancers_Heart_12078,Enhancers_Heart_12093,Enhancers_Heart_13168,Enhancers_Heart_15623,Enhancers_Heart_22185,Enhancers_Heart_22200,Enhancers_Heart_2407,Enhancers_Heart_2411,Enhancers_Heart_2418,Enhancers_Heart_2423,Enhancers_Heart_2576,Enhancers_Heart_33033,Enhancer…
												Enhancers_Heart_2149,Enhancers_Heart_2150,Enhancers_Heart_2151,Enhancers_Heart_24673,Enhancers_Heart_29220,Enhancers_Heart_29243,Enhancers_Heart_29252,Enhancers_Heart_32952,Enhancers_Heart_33114,Enhancers_Heart_33116,Enhancers_Heart_40976,Enhancers_Heart_40978,Enhancers_Heart_40979,Enhancers_Heart_40980,Enhancers_Heart_40981,Enhancers_Heart_40983,Enhancers_Heart_40984,Enhancers_Heart_46213,Enhanc…
												Enhancers_Heart_2407,Enhancers_Heart_2411,Enhancers_Heart_2418,Enhancers_Heart_2423,Enhancers_Heart_30210,Enhancers_Heart_38371,Enhancers_Heart_38380,Enhancers_Heart_38388,Enhancers_Heart_38404,Enhancers_Heart_38421,Enhancers_Heart_51061,Enhancers_Heart_51062,Enhancers_Heart_53641,Enhancers_Heart_53937,Enhancers_Heart_56735,Enhancers_Heart_58078,Enhancers_Heart_61629,Enhancers_Heart_61649,Enhance…
												Enhancers_Heart_13424,Enhancers_Heart_13431,Enhancers_Heart_13455,Enhancers_Heart_13464,Enhancers_Heart_15623,Enhancers_Heart_16620,Enhancers_Heart_17134,Enhancers_Heart_19404,Enhancers_Heart_19406,Enhancers_Heart_19432,Enhancers_Heart_19434,Enhancers_Heart_19438,Enhancers_Heart_20060,Enhancers_Heart_20064,Enhancers_Heart_20085,Enhancers_Heart_21308,Enhancers_Heart_3639,Enhancers_Heart_3640,Enhan…
												Enhancers_Heart_10948,Enhancers_Heart_11640,Enhancers_Heart_11641,Enhancers_Heart_14990,Enhancers_Heart_17028,Enhancers_Heart_18367,Enhancers_Heart_19404,Enhancers_Heart_19406,Enhancers_Heart_19432,Enhancers_Heart_19434,Enhancers_Heart_19438,Enhancers_Heart_21915,Enhancers_Heart_2264,Enhancers_Heart_2274,Enhancers_Heart_2294,Enhancers_Heart_2300,Enhancers_Heart_2301,Enhancers_Heart_2306,Enhancers…
												Enhancers_Heart_12127,Enhancers_Heart_45131,Enhancers_Heart_45138,Enhancers_Heart_45147,Enhancers_Heart_45159,Enhancers_Heart_45181,Enhancers_Heart_46985,Enhancers_Heart_52226,Enhancers_Heart_54399,Enhancers_Heart_5682,Enhancers_Heart_5683,Enhancers_Heart_5695,Enhancers_Heart_5698,Enhancers_Heart_58305,Enhancers_Heart_58308,Enhancers_Heart_58309,Enhancers_Heart_58310,Enhancers_Heart_81906,Enhance…
												Enhancers_Heart_10219,Enhancers_Heart_10948,Enhancers_Heart_11533,Enhancers_Heart_11534,Enhancers_Heart_11547,Enhancers_Heart_11551,Enhancers_Heart_11691,Enhancers_Heart_11692,Enhancers_Heart_11696,Enhancers_Heart_11698,Enhancers_Heart_11699,Enhancers_Heart_11717,Enhancers_Heart_12078,Enhancers_Heart_13424,Enhancers_Heart_13431,Enhancers_Heart_14365,Enhancers_Heart_14990,Enhancers_Heart_15382,Enh…
												Enhancers_Heart_28695,Enhancers_Heart_28697,Enhancers_Heart_28698,Enhancers_Heart_29061,Enhancers_Heart_29065,Enhancers_Heart_29084,Enhancers_Heart_29220,Enhancers_Heart_29243,Enhancers_Heart_29252,Enhancers_Heart_39682,Enhancers_Heart_39696,Enhancers_Heart_39698,Enhancers_Heart_46317,Enhancers_Heart_46318,Enhancers_Heart_46323,Enhancers_Heart_48739,Enhancers_Heart_48753,Enhancers_Heart_52589,Enh…
												Enhancers_Heart_19978,Enhancers_Heart_19980,Enhancers_Heart_19984,Enhancers_Heart_19985,Enhancers_Heart_19996,Enhancers_Heart_19997,Enhancers_Heart_20007,Enhancers_Heart_20013,Enhancers_Heart_20015,Enhancers_Heart_20023,Enhancers_Heart_20048,Enhancers_Heart_27202,Enhancers_Heart_27205,Enhancers_Heart_33738,Enhancers_Heart_41012,Enhancers_Heart_41047,Enhancers_Heart_43462,Enhancers_Heart_43471,Enh…
												Enhancers_Heart_10174,Enhancers_Heart_1078,Enhancers_Heart_10829,Enhancers_Heart_10833,Enhancers_Heart_1087,Enhancers_Heart_11299,Enhancers_Heart_12127,Enhancers_Heart_12333,Enhancers_Heart_12593,Enhancers_Heart_12615,Enhancers_Heart_13455,Enhancers_Heart_13464,Enhancers_Heart_13490,Enhancers_Heart_13495,Enhancers_Heart_13666,Enhancers_Heart_14640,Enhancers_Heart_14641,Enhancers_Heart_14643,Enhan…
												Enhancers_Heart_14474,Enhancers_Heart_16324,Enhancers_Heart_21078,Enhancers_Heart_21108,Enhancers_Heart_21114,Enhancers_Heart_21123,Enhancers_Heart_21125,Enhancers_Heart_21141,Enhancers_Heart_21915,Enhancers_Heart_26195,Enhancers_Heart_26212,Enhancers_Heart_26213,Enhancers_Heart_26227,Enhancers_Heart_26239,Enhancers_Heart_26247,Enhancers_Heart_26248,Enhancers_Heart_28695,Enhancers_Heart_28697,Enh…
												Enhancers_Heart_2407,Enhancers_Heart_2411,Enhancers_Heart_2418,Enhancers_Heart_2423,Enhancers_Heart_30210,Enhancers_Heart_38371,Enhancers_Heart_38380,Enhancers_Heart_38388,Enhancers_Heart_38404,Enhancers_Heart_38421,Enhancers_Heart_51061,Enhancers_Heart_51062,Enhancers_Heart_53641,Enhancers_Heart_53937,Enhancers_Heart_56735,Enhancers_Heart_61629,Enhancers_Heart_61649,Enhancers_Heart_61650,Enhance…
												Enhancers_Heart_11001,Enhancers_Heart_11533,Enhancers_Heart_11534,Enhancers_Heart_11547,Enhancers_Heart_11551,Enhancers_Heart_14990,Enhancers_Heart_15623,Enhancers_Heart_17084,Enhancers_Heart_19404,Enhancers_Heart_19406,Enhancers_Heart_19432,Enhancers_Heart_19434,Enhancers_Heart_19438,Enhancers_Heart_19978,Enhancers_Heart_19980,Enhancers_Heart_19984,Enhancers_Heart_19985,Enhancers_Heart_19996,Enh…
												Enhancers_Heart_10078,Enhancers_Heart_10907,Enhancers_Heart_10909,Enhancers_Heart_10910,Enhancers_Heart_10929,Enhancers_Heart_10930,Enhancers_Heart_10931,Enhancers_Heart_11640,Enhancers_Heart_11641,Enhancers_Heart_13255,Enhancers_Heart_13265,Enhancers_Heart_14919,Enhancers_Heart_15851,Enhancers_Heart_16884,Enhancers_Heart_16885,Enhancers_Heart_17154,Enhancers_Heart_18651,Enhancers_Heart_19874,Enh…
												Enhancers_Heart_10078,Enhancers_Heart_10907,Enhancers_Heart_10909,Enhancers_Heart_10910,Enhancers_Heart_10929,Enhancers_Heart_10930,Enhancers_Heart_10931,Enhancers_Heart_11640,Enhancers_Heart_11641,Enhancers_Heart_13255,Enhancers_Heart_13265,Enhancers_Heart_14919,Enhancers_Heart_15851,Enhancers_Heart_16884,Enhancers_Heart_16885,Enhancers_Heart_17154,Enhancers_Heart_18651,Enhancers_Heart_19874,Enh…
												Enhancers_Heart_10907,Enhancers_Heart_10909,Enhancers_Heart_10910,Enhancers_Heart_10929,Enhancers_Heart_10930,Enhancers_Heart_10931,Enhancers_Heart_11001,Enhancers_Heart_11533,Enhancers_Heart_11534,Enhancers_Heart_11547,Enhancers_Heart_11551,Enhancers_Heart_14990,Enhancers_Heart_15046,Enhancers_Heart_15048,Enhancers_Heart_15049,Enhancers_Heart_15055,Enhancers_Heart_15056,Enhancers_Heart_15623,Enh…
												Enhancers_Heart_10078,Enhancers_Heart_10108,Enhancers_Heart_15729,Enhancers_Heart_15730,Enhancers_Heart_32896,Enhancers_Heart_32901,Enhancers_Heart_32931,Enhancers_Heart_32932,Enhancers_Heart_32952,Enhancers_Heart_41012,Enhancers_Heart_41047,Enhancers_Heart_45131,Enhancers_Heart_45138,Enhancers_Heart_45147,Enhancers_Heart_45159,Enhancers_Heart_45181,Enhancers_Heart_48296,Enhancers_Heart_53829,Enh…
												Enhancers_Heart_13666,Enhancers_Heart_13676,Enhancers_Heart_13684,Enhancers_Heart_18073,Enhancers_Heart_26195,Enhancers_Heart_26212,Enhancers_Heart_26213,Enhancers_Heart_26227,Enhancers_Heart_26239,Enhancers_Heart_26247,Enhancers_Heart_26248,Enhancers_Heart_29061,Enhancers_Heart_29065,Enhancers_Heart_29084,Enhancers_Heart_29220,Enhancers_Heart_29243,Enhancers_Heart_29252,Enhancers_Heart_29948,Enh…
												Enhancers_Heart_13666,Enhancers_Heart_13676,Enhancers_Heart_13684,Enhancers_Heart_29061,Enhancers_Heart_29065,Enhancers_Heart_29084,Enhancers_Heart_29948,Enhancers_Heart_29958,Enhancers_Heart_32815,Enhancers_Heart_32844,Enhancers_Heart_32850,Enhancers_Heart_32851,Enhancers_Heart_32852,Enhancers_Heart_32853,Enhancers_Heart_32854,Enhancers_Heart_32866,Enhancers_Heart_52589,Enhancers_Heart_55627,Enh…
												Enhancers_Heart_10907,Enhancers_Heart_10909,Enhancers_Heart_10910,Enhancers_Heart_10929,Enhancers_Heart_10930,Enhancers_Heart_10931,Enhancers_Heart_14919,Enhancers_Heart_20479,Enhancers_Heart_24673,Enhancers_Heart_29948,Enhancers_Heart_29958,Enhancers_Heart_30228,Enhancers_Heart_30232,Enhancers_Heart_30235,Enhancers_Heart_30243,Enhancers_Heart_34853,Enhancers_Heart_34882,Enhancers_Heart_34883,Enh…
												Enhancers_Heart_12078,Enhancers_Heart_14990,Enhancers_Heart_15169,Enhancers_Heart_16361,Enhancers_Heart_20479,Enhancers_Heart_22502,Enhancers_Heart_22546,Enhancers_Heart_22551,Enhancers_Heart_22561,Enhancers_Heart_22569,Enhancers_Heart_24673,Enhancers_Heart_25124,Enhancers_Heart_25126,Enhancers_Heart_25127,Enhancers_Heart_25663,Enhancers_Heart_26071,Enhancers_Heart_26072,Enhancers_Heart_26083,Enh…
												Enhancers_Heart_10907,Enhancers_Heart_10909,Enhancers_Heart_10910,Enhancers_Heart_10929,Enhancers_Heart_10930,Enhancers_Heart_10931,Enhancers_Heart_12078,Enhancers_Heart_12093,Enhancers_Heart_13168,Enhancers_Heart_15623,Enhancers_Heart_22185,Enhancers_Heart_22200,Enhancers_Heart_2407,Enhancers_Heart_2411,Enhancers_Heart_2418,Enhancers_Heart_2423,Enhancers_Heart_2576,Enhancers_Heart_33033,Enhancer…
												Enhancers_Heart_10078,Enhancers_Heart_10208,Enhancers_Heart_10219,Enhancers_Heart_104,Enhancers_Heart_10829,Enhancers_Heart_10833,Enhancers_Heart_10907,Enhancers_Heart_10909,Enhancers_Heart_10910,Enhancers_Heart_10929,Enhancers_Heart_10930,Enhancers_Heart_10931,Enhancers_Heart_12078,Enhancers_Heart_12127,Enhancers_Heart_12354,Enhancers_Heart_12593,Enhancers_Heart_12615,Enhancers_Heart_129,Enhance…
												Enhancers_Heart_29581,Enhancers_Heart_30228,Enhancers_Heart_30232,Enhancers_Heart_30235,Enhancers_Heart_30243,Enhancers_Heart_53519,Enhancers_Heart_53524,Enhancers_Heart_53536,Enhancers_Heart_63174,Enhancers_Heart_77259,Enhancers_Heart_77260,Enhancers_Heart_77261,Enhancers_Heart_87335,Enhancers_Heart_87339,Enhancers_Heart_87349,Enhancers_Heart_9234,Enhancers_Heart_9243,Enhancers_Heart_9246,Enhanc…
												Enhancers_Heart_20705,Enhancers_Heart_26806,Enhancers_Heart_26841,Enhancers_Heart_26856,Enhancers_Heart_26857,Enhancers_Heart_26861,Enhancers_Heart_26886,Enhancers_Heart_26888,Enhancers_Heart_26889,Enhancers_Heart_26893,Enhancers_Heart_26897,Enhancers_Heart_26899,Enhancers_Heart_44272,Enhancers_Heart_44278,Enhancers_Heart_44283,Enhancers_Heart_44328,Enhancers_Heart_731
												Enhancers_Heart_10174,Enhancers_Heart_10208,Enhancers_Heart_1078,Enhancers_Heart_10829,Enhancers_Heart_10833,Enhancers_Heart_1087,Enhancers_Heart_11299,Enhancers_Heart_12127,Enhancers_Heart_12333,Enhancers_Heart_13455,Enhancers_Heart_13464,Enhancers_Heart_13490,Enhancers_Heart_13495,Enhancers_Heart_13666,Enhancers_Heart_15169,Enhancers_Heart_16074,Enhancers_Heart_16108,Enhancers_Heart_16176,Enhan…
												Enhancers_Heart_10907,Enhancers_Heart_10909,Enhancers_Heart_10910,Enhancers_Heart_10929,Enhancers_Heart_10930,Enhancers_Heart_10931,Enhancers_Heart_12354,Enhancers_Heart_12372,Enhancers_Heart_14919,Enhancers_Heart_1967,Enhancers_Heart_20291,Enhancers_Heart_20305,Enhancers_Heart_2306,Enhancers_Heart_2307,Enhancers_Heart_2309,Enhancers_Heart_2310,Enhancers_Heart_23391,Enhancers_Heart_26195,Enhancer…
												Enhancers_Heart_18,Enhancers_Heart_27884,Enhancers_Heart_27886,Enhancers_Heart_27887,Enhancers_Heart_27895,Enhancers_Heart_27899,Enhancers_Heart_27923,Enhancers_Heart_27925,Enhancers_Heart_27935,Enhancers_Heart_27941,Enhancers_Heart_27942,Enhancers_Heart_27943,Enhancers_Heart_27950,Enhancers_Heart_27951,Enhancers_Heart_27960,Enhancers_Heart_27965,Enhancers_Heart_47423,Enhancers_Heart_48044,Enhanc…
												Enhancers_Heart_10572,Enhancers_Heart_10829,Enhancers_Heart_10833,Enhancers_Heart_10864,Enhancers_Heart_10865,Enhancers_Heart_10907,Enhancers_Heart_10909,Enhancers_Heart_10910,Enhancers_Heart_10929,Enhancers_Heart_10930,Enhancers_Heart_10931,Enhancers_Heart_11563,Enhancers_Heart_11573,Enhancers_Heart_11609,Enhancers_Heart_11612,Enhancers_Heart_11640,Enhancers_Heart_11641,Enhancers_Heart_11906,Enh…
												Enhancers_Heart_10219,Enhancers_Heart_10948,Enhancers_Heart_11533,Enhancers_Heart_11534,Enhancers_Heart_11547,Enhancers_Heart_11551,Enhancers_Heart_11691,Enhancers_Heart_11692,Enhancers_Heart_11696,Enhancers_Heart_11698,Enhancers_Heart_11699,Enhancers_Heart_11717,Enhancers_Heart_12078,Enhancers_Heart_13424,Enhancers_Heart_13431,Enhancers_Heart_14365,Enhancers_Heart_14990,Enhancers_Heart_15382,Enh…
												Enhancers_Heart_10219,Enhancers_Heart_10948,Enhancers_Heart_1134,Enhancers_Heart_11533,Enhancers_Heart_11534,Enhancers_Heart_11547,Enhancers_Heart_11551,Enhancers_Heart_11691,Enhancers_Heart_11692,Enhancers_Heart_11696,Enhancers_Heart_11698,Enhancers_Heart_11699,Enhancers_Heart_11717,Enhancers_Heart_12078,Enhancers_Heart_13424,Enhancers_Heart_13431,Enhancers_Heart_14365,Enhancers_Heart_14990,Enha…
												Enhancers_Heart_10907,Enhancers_Heart_10909,Enhancers_Heart_10910,Enhancers_Heart_10929,Enhancers_Heart_10930,Enhancers_Heart_10931,Enhancers_Heart_11001,Enhancers_Heart_1171,Enhancers_Heart_12078,Enhancers_Heart_12405,Enhancers_Heart_1249,Enhancers_Heart_1274,Enhancers_Heart_14311,Enhancers_Heart_14618,Enhancers_Heart_14640,Enhancers_Heart_14641,Enhancers_Heart_14643,Enhancers_Heart_14655,Enhanc…
												Enhancers_Heart_10108,Enhancers_Heart_10907,Enhancers_Heart_10909,Enhancers_Heart_10910,Enhancers_Heart_10929,Enhancers_Heart_10930,Enhancers_Heart_10931,Enhancers_Heart_11533,Enhancers_Heart_11534,Enhancers_Heart_11547,Enhancers_Heart_11551,Enhancers_Heart_18073,Enhancers_Heart_21078,Enhancers_Heart_21108,Enhancers_Heart_21114,Enhancers_Heart_21123,Enhancers_Heart_21125,Enhancers_Heart_21141,Enh…
												Enhancers_Heart_13529,Enhancers_Heart_13532,Enhancers_Heart_13533,Enhancers_Heart_13552,Enhancers_Heart_13557,Enhancers_Heart_15623,Enhancers_Heart_15851,Enhancers_Heart_1607,Enhancers_Heart_16438,Enhancers_Heart_17576,Enhancers_Heart_20705,Enhancers_Heart_21915,Enhancers_Heart_22111,Enhancers_Heart_22115,Enhancers_Heart_22118,Enhancers_Heart_22378,Enhancers_Heart_22380,Enhancers_Heart_22381,Enha…
												Enhancers_Heart_10907,Enhancers_Heart_10909,Enhancers_Heart_10910,Enhancers_Heart_10929,Enhancers_Heart_10930,Enhancers_Heart_10931,Enhancers_Heart_12127,Enhancers_Heart_12372,Enhancers_Heart_13195,Enhancers_Heart_13202,Enhancers_Heart_13255,Enhancers_Heart_13265,Enhancers_Heart_13529,Enhancers_Heart_13532,Enhancers_Heart_13533,Enhancers_Heart_13552,Enhancers_Heart_13557,Enhancers_Heart_15211,Enh…
												Enhancers_Heart_3919,Enhancers_Heart_55188,Enhancers_Heart_76075,Enhancers_Heart_76076,Enhancers_Heart_96369,Enhancers_Heart_96372,Enhancers_Heart_96373,Enhancers_Heart_96376
												Enhancers_Heart_12354,Enhancers_Heart_14640,Enhancers_Heart_14641,Enhancers_Heart_14643,Enhancers_Heart_14655,Enhancers_Heart_20085,Enhancers_Heart_26322,Enhancers_Heart_26323,Enhancers_Heart_29421,Enhancers_Heart_29422,Enhancers_Heart_29423,Enhancers_Heart_29424,Enhancers_Heart_4040,Enhancers_Heart_53455,Enhancers_Heart_55231,Enhancers_Heart_55237,Enhancers_Heart_55268,Enhancers_Heart_55289,Enha…
												Enhancers_Heart_10208,Enhancers_Heart_10572,Enhancers_Heart_11001,Enhancers_Heart_12127,Enhancers_Heart_12354,Enhancers_Heart_13075,Enhancers_Heart_13080,Enhancers_Heart_14474,Enhancers_Heart_14919,Enhancers_Heart_16438,Enhancers_Heart_16948,Enhancers_Heart_16953,Enhancers_Heart_17274,Enhancers_Heart_19404,Enhancers_Heart_19406,Enhancers_Heart_19432,Enhancers_Heart_19434,Enhancers_Heart_19438,Enh…
												Enhancers_Heart_10907,Enhancers_Heart_10909,Enhancers_Heart_10910,Enhancers_Heart_10929,Enhancers_Heart_10930,Enhancers_Heart_10931,Enhancers_Heart_12078,Enhancers_Heart_12093,Enhancers_Heart_15623,Enhancers_Heart_22185,Enhancers_Heart_22200,Enhancers_Heart_2407,Enhancers_Heart_2411,Enhancers_Heart_2418,Enhancers_Heart_2423,Enhancers_Heart_38211,Enhancers_Heart_38212,Enhancers_Heart_38216,Enhance…
												Enhancers_Heart_104,Enhancers_Heart_10572,Enhancers_Heart_12354,Enhancers_Heart_12372,Enhancers_Heart_129,Enhancers_Heart_14466,Enhancers_Heart_14919,Enhancers_Heart_15623,Enhancers_Heart_15851,Enhancers_Heart_16690,Enhancers_Heart_16761,Enhancers_Heart_16764,Enhancers_Heart_16884,Enhancers_Heart_16885,Enhancers_Heart_17154,Enhancers_Heart_17696,Enhancers_Heart_18073,Enhancers_Heart_1877,Enhancer…
												Enhancers_Heart_10078,Enhancers_Heart_12586,Enhancers_Heart_15425,Enhancers_Heart_15430,Enhancers_Heart_15729,Enhancers_Heart_15730,Enhancers_Heart_16324,Enhancers_Heart_18715,Enhancers_Heart_18717,Enhancers_Heart_21776,Enhancers_Heart_22378,Enhancers_Heart_22380,Enhancers_Heart_22381,Enhancers_Heart_24696,Enhancers_Heart_24705,Enhancers_Heart_24706,Enhancers_Heart_24728,Enhancers_Heart_28695,Enh…
												Enhancers_Heart_10174,Enhancers_Heart_10208,Enhancers_Heart_1078,Enhancers_Heart_10829,Enhancers_Heart_10833,Enhancers_Heart_1087,Enhancers_Heart_10907,Enhancers_Heart_10909,Enhancers_Heart_10910,Enhancers_Heart_10929,Enhancers_Heart_10930,Enhancers_Heart_10931,Enhancers_Heart_11299,Enhancers_Heart_12127,Enhancers_Heart_12333,Enhancers_Heart_12593,Enhancers_Heart_12615,Enhancers_Heart_13455,Enhan…
												Enhancers_Heart_10108,Enhancers_Heart_10929,Enhancers_Heart_10930,Enhancers_Heart_10931,Enhancers_Heart_14294,Enhancers_Heart_14618,Enhancers_Heart_15787,Enhancers_Heart_16658,Enhancers_Heart_17154,Enhancers_Heart_17329,Enhancers_Heart_19882,Enhancers_Heart_19889,Enhancers_Heart_20060,Enhancers_Heart_20064,Enhancers_Heart_20085,Enhancers_Heart_25364,Enhancers_Heart_26761,Enhancers_Heart_26763,Enh…
												Enhancers_Heart_10907,Enhancers_Heart_10909,Enhancers_Heart_10910,Enhancers_Heart_10929,Enhancers_Heart_10930,Enhancers_Heart_10931,Enhancers_Heart_12078,Enhancers_Heart_12093,Enhancers_Heart_15623,Enhancers_Heart_22185,Enhancers_Heart_22200,Enhancers_Heart_2407,Enhancers_Heart_2411,Enhancers_Heart_2418,Enhancers_Heart_2423,Enhancers_Heart_33237,Enhancers_Heart_33239,Enhancers_Heart_49167,Enhance…
												Enhancers_Heart_11726,Enhancers_Heart_15211,Enhancers_Heart_19978,Enhancers_Heart_19980,Enhancers_Heart_19984,Enhancers_Heart_19985,Enhancers_Heart_19996,Enhancers_Heart_19997,Enhancers_Heart_20007,Enhancers_Heart_20013,Enhancers_Heart_20015,Enhancers_Heart_20023,Enhancers_Heart_20048,Enhancers_Heart_20204,Enhancers_Heart_20209,Enhancers_Heart_20217,Enhancers_Heart_20228,Enhancers_Heart_20230,Enh…
												Enhancers_Heart_10907,Enhancers_Heart_10909,Enhancers_Heart_10910,Enhancers_Heart_10929,Enhancers_Heart_10930,Enhancers_Heart_10931,Enhancers_Heart_16324,Enhancers_Heart_19615,Enhancers_Heart_19616,Enhancers_Heart_19874,Enhancers_Heart_19882,Enhancers_Heart_19889,Enhancers_Heart_19978,Enhancers_Heart_19980,Enhancers_Heart_19984,Enhancers_Heart_19985,Enhancers_Heart_19996,Enhancers_Heart_19997,Enh…
												Enhancers_Heart_14919,Enhancers_Heart_2306,Enhancers_Heart_2307,Enhancers_Heart_2309,Enhancers_Heart_2310,Enhancers_Heart_26195,Enhancers_Heart_26212,Enhancers_Heart_26213,Enhancers_Heart_26227,Enhancers_Heart_26239,Enhancers_Heart_26247,Enhancers_Heart_26248,Enhancers_Heart_27832,Enhancers_Heart_27833,Enhancers_Heart_27834,Enhancers_Heart_27845,Enhancers_Heart_27846,Enhancers_Heart_27869,Enhance…
												Enhancers_Heart_10907,Enhancers_Heart_10909,Enhancers_Heart_10910,Enhancers_Heart_10929,Enhancers_Heart_10930,Enhancers_Heart_10931,Enhancers_Heart_11640,Enhancers_Heart_11641,Enhancers_Heart_11906,Enhancers_Heart_11910,Enhancers_Heart_12078,Enhancers_Heart_13255,Enhancers_Heart_13265,Enhancers_Heart_16324,Enhancers_Heart_16884,Enhancers_Heart_16885,Enhancers_Heart_17274,Enhancers_Heart_18073,Enh…
												Enhancers_Heart_2149,Enhancers_Heart_2150,Enhancers_Heart_2151,Enhancers_Heart_29220,Enhancers_Heart_29243,Enhancers_Heart_29252,Enhancers_Heart_32952,Enhancers_Heart_33114,Enhancers_Heart_33116,Enhancers_Heart_40976,Enhancers_Heart_40978,Enhancers_Heart_40979,Enhancers_Heart_40980,Enhancers_Heart_40981,Enhancers_Heart_40983,Enhancers_Heart_40984,Enhancers_Heart_46213,Enhancers_Heart_48523,Enhanc…
												Enhancers_Heart_10078,Enhancers_Heart_10108,Enhancers_Heart_104,Enhancers_Heart_10572,Enhancers_Heart_11726,Enhancers_Heart_11906,Enhancers_Heart_11910,Enhancers_Heart_12127,Enhancers_Heart_12593,Enhancers_Heart_12615,Enhancers_Heart_129,Enhancers_Heart_1290,Enhancers_Heart_1294,Enhancers_Heart_13255,Enhancers_Heart_13265,Enhancers_Heart_14474,Enhancers_Heart_15217,Enhancers_Heart_1615,Enhancers_…
												Enhancers_Heart_12078,Enhancers_Heart_14990,Enhancers_Heart_15169,Enhancers_Heart_16361,Enhancers_Heart_20479,Enhancers_Heart_22502,Enhancers_Heart_22546,Enhancers_Heart_22551,Enhancers_Heart_22561,Enhancers_Heart_22569,Enhancers_Heart_24673,Enhancers_Heart_25124,Enhancers_Heart_25126,Enhancers_Heart_25127,Enhancers_Heart_25663,Enhancers_Heart_26071,Enhancers_Heart_26072,Enhancers_Heart_26083,Enh…
												Enhancers_Heart_11001,Enhancers_Heart_1171,Enhancers_Heart_1249,Enhancers_Heart_12622,Enhancers_Heart_12623,Enhancers_Heart_1274,Enhancers_Heart_14311,Enhancers_Heart_14618,Enhancers_Heart_14686,Enhancers_Heart_15623,Enhancers_Heart_17084,Enhancers_Heart_18606,Enhancers_Heart_18704,Enhancers_Heart_18705,Enhancers_Heart_18706,Enhancers_Heart_1877,Enhancers_Heart_18979,Enhancers_Heart_19404,Enhance…
												Enhancers_Heart_14474,Enhancers_Heart_15565,Enhancers_Heart_15570,Enhancers_Heart_15572,Enhancers_Heart_15623,Enhancers_Heart_16236,Enhancers_Heart_16690,Enhancers_Heart_1673,Enhancers_Heart_1677,Enhancers_Heart_1678,Enhancers_Heart_16896,Enhancers_Heart_18331,Enhancers_Heart_18332,Enhancers_Heart_21489,Enhancers_Heart_21545,Enhancers_Heart_21547,Enhancers_Heart_2186,Enhancers_Heart_21915,Enhance…
												Enhancers_Heart_10698,Enhancers_Heart_10710,Enhancers_Heart_10729,Enhancers_Heart_11563,Enhancers_Heart_11573,Enhancers_Heart_11609,Enhancers_Heart_11612,Enhancers_Heart_1171,Enhancers_Heart_11906,Enhancers_Heart_11910,Enhancers_Heart_12078,Enhancers_Heart_12242,Enhancers_Heart_12258,Enhancers_Heart_12333,Enhancers_Heart_12622,Enhancers_Heart_12623,Enhancers_Heart_13424,Enhancers_Heart_13431,Enha…
												Enhancers_Heart_10108,Enhancers_Heart_10829,Enhancers_Heart_10833,Enhancers_Heart_10864,Enhancers_Heart_10865,Enhancers_Heart_10907,Enhancers_Heart_10909,Enhancers_Heart_10910,Enhancers_Heart_10929,Enhancers_Heart_10930,Enhancers_Heart_10931,Enhancers_Heart_12078,Enhancers_Heart_12093,Enhancers_Heart_13424,Enhancers_Heart_13431,Enhancers_Heart_13455,Enhancers_Heart_13464,Enhancers_Heart_14311,Enh…
												Enhancers_Heart_13529,Enhancers_Heart_13532,Enhancers_Heart_13533,Enhancers_Heart_13552,Enhancers_Heart_13557,Enhancers_Heart_15623,Enhancers_Heart_1607,Enhancers_Heart_16438,Enhancers_Heart_22111,Enhancers_Heart_22115,Enhancers_Heart_22118,Enhancers_Heart_22378,Enhancers_Heart_22380,Enhancers_Heart_22381,Enhancers_Heart_22920,Enhancers_Heart_26806,Enhancers_Heart_26841,Enhancers_Heart_26856,Enha…
												Enhancers_Heart_10572,Enhancers_Heart_11726,Enhancers_Heart_12372,Enhancers_Heart_12593,Enhancers_Heart_12615,Enhancers_Heart_13255,Enhancers_Heart_13265,Enhancers_Heart_15211,Enhancers_Heart_15565,Enhancers_Heart_15570,Enhancers_Heart_15572,Enhancers_Heart_15590,Enhancers_Heart_1877,Enhancers_Heart_19615,Enhancers_Heart_19616,Enhancers_Heart_2264,Enhancers_Heart_2274,Enhancers_Heart_2294,Enhance…
												Enhancers_Heart_31326,Enhancers_Heart_31327,Enhancers_Heart_32221,Enhancers_Heart_32224,Enhancers_Heart_32226,Enhancers_Heart_36225,Enhancers_Heart_36228,Enhancers_Heart_36230,Enhancers_Heart_40976,Enhancers_Heart_40978,Enhancers_Heart_40979,Enhancers_Heart_40980,Enhancers_Heart_40981,Enhancers_Heart_40983,Enhancers_Heart_40984,Enhancers_Heart_69955,Enhancers_Heart_71994,Enhancers_Heart_8207,Enha…
												Enhancers_Heart_10572,Enhancers_Heart_13529,Enhancers_Heart_13532,Enhancers_Heart_13533,Enhancers_Heart_13552,Enhancers_Heart_13557,Enhancers_Heart_14474,Enhancers_Heart_14919,Enhancers_Heart_1615,Enhancers_Heart_16194,Enhancers_Heart_16195,Enhancers_Heart_16196,Enhancers_Heart_16205,Enhancers_Heart_16206,Enhancers_Heart_1639,Enhancers_Heart_1673,Enhancers_Heart_1677,Enhancers_Heart_1678,Enhancer…
												Enhancers_Heart_10108,Enhancers_Heart_10829,Enhancers_Heart_10833,Enhancers_Heart_12078,Enhancers_Heart_14919,Enhancers_Heart_15623,Enhancers_Heart_16438,Enhancers_Heart_17084,Enhancers_Heart_17576,Enhancers_Heart_19874,Enhancers_Heart_21390,Enhancers_Heart_21402,Enhancers_Heart_21915,Enhancers_Heart_24086,Enhancers_Heart_24094,Enhancers_Heart_24095,Enhancers_Heart_24891,Enhancers_Heart_25292,Enh…
												Enhancers_Heart_16620,Enhancers_Heart_1967,Enhancers_Heart_24840,Enhancers_Heart_24891,Enhancers_Heart_33301,Enhancers_Heart_33305,Enhancers_Heart_33334,Enhancers_Heart_33335,Enhancers_Heart_34853,Enhancers_Heart_34882,Enhancers_Heart_34883,Enhancers_Heart_4560,Enhancers_Heart_46746,Enhancers_Heart_59270,Enhancers_Heart_59274,Enhancers_Heart_59275,Enhancers_Heart_77259,Enhancers_Heart_77260,Enhan…
												Enhancers_Heart_16620,Enhancers_Heart_24840,Enhancers_Heart_24891,Enhancers_Heart_33301,Enhancers_Heart_33305,Enhancers_Heart_33334,Enhancers_Heart_33335,Enhancers_Heart_34853,Enhancers_Heart_34882,Enhancers_Heart_34883,Enhancers_Heart_4560,Enhancers_Heart_46746,Enhancers_Heart_59270,Enhancers_Heart_59274,Enhancers_Heart_59275,Enhancers_Heart_77259,Enhancers_Heart_77260,Enhancers_Heart_77261,Enha…
												Enhancers_Heart_10208,Enhancers_Heart_10572,Enhancers_Heart_10829,Enhancers_Heart_10833,Enhancers_Heart_11640,Enhancers_Heart_11641,Enhancers_Heart_12078,Enhancers_Heart_12593,Enhancers_Heart_12615,Enhancers_Heart_17154,Enhancers_Heart_202,Enhancers_Heart_21489,Enhancers_Heart_21545,Enhancers_Heart_21547,Enhancers_Heart_22066,Enhancers_Heart_22069,Enhancers_Heart_22072,Enhancers_Heart_22073,Enhan…
												Enhancers_Heart_12354,Enhancers_Heart_12372,Enhancers_Heart_14919,Enhancers_Heart_1967,Enhancers_Heart_20291,Enhancers_Heart_20305,Enhancers_Heart_26195,Enhancers_Heart_26212,Enhancers_Heart_26213,Enhancers_Heart_26227,Enhancers_Heart_26239,Enhancers_Heart_26247,Enhancers_Heart_26248,Enhancers_Heart_29719,Enhancers_Heart_30380,Enhancers_Heart_34978,Enhancers_Heart_34988,Enhancers_Heart_38437,Enha…
												Enhancers_Heart_10078,Enhancers_Heart_10108,Enhancers_Heart_1078,Enhancers_Heart_1087,Enhancers_Heart_10949,Enhancers_Heart_10980,Enhancers_Heart_10981,Enhancers_Heart_10983,Enhancers_Heart_11001,Enhancers_Heart_13290,Enhancers_Heart_13529,Enhancers_Heart_13532,Enhancers_Heart_13533,Enhancers_Heart_13552,Enhancers_Heart_13557,Enhancers_Heart_15623,Enhancers_Heart_15813,Enhancers_Heart_1607,Enhanc…
												Enhancers_Heart_12372,Enhancers_Heart_14919,Enhancers_Heart_1967,Enhancers_Heart_20291,Enhancers_Heart_20305,Enhancers_Heart_26195,Enhancers_Heart_26212,Enhancers_Heart_26213,Enhancers_Heart_26227,Enhancers_Heart_26239,Enhancers_Heart_26247,Enhancers_Heart_26248,Enhancers_Heart_29719,Enhancers_Heart_30380,Enhancers_Heart_34978,Enhancers_Heart_34988,Enhancers_Heart_38437,Enhancers_Heart_38438,Enha…
												Enhancers_Heart_10907,Enhancers_Heart_10909,Enhancers_Heart_10910,Enhancers_Heart_10929,Enhancers_Heart_10930,Enhancers_Heart_10931,Enhancers_Heart_11640,Enhancers_Heart_11641,Enhancers_Heart_13255,Enhancers_Heart_13265,Enhancers_Heart_17154,Enhancers_Heart_19874,Enhancers_Heart_19882,Enhancers_Heart_19889,Enhancers_Heart_22378,Enhancers_Heart_22380,Enhancers_Heart_22381,Enhancers_Heart_23391,Enh…
												Enhancers_Heart_14474,Enhancers_Heart_16324,Enhancers_Heart_21078,Enhancers_Heart_21108,Enhancers_Heart_21114,Enhancers_Heart_21123,Enhancers_Heart_21125,Enhancers_Heart_21141,Enhancers_Heart_21915,Enhancers_Heart_26195,Enhancers_Heart_26212,Enhancers_Heart_26213,Enhancers_Heart_26227,Enhancers_Heart_26239,Enhancers_Heart_26247,Enhancers_Heart_26248,Enhancers_Heart_28695,Enhancers_Heart_28697,Enh…
												Enhancers_Heart_10907,Enhancers_Heart_10909,Enhancers_Heart_10910,Enhancers_Heart_10929,Enhancers_Heart_10930,Enhancers_Heart_10931,Enhancers_Heart_11563,Enhancers_Heart_11573,Enhancers_Heart_11609,Enhancers_Heart_11612,Enhancers_Heart_13719,Enhancers_Heart_15787,Enhancers_Heart_16324,Enhancers_Heart_1877,Enhancers_Heart_20060,Enhancers_Heart_20064,Enhancers_Heart_20085,Enhancers_Heart_20479,Enha…
												Enhancers_Heart_10907,Enhancers_Heart_10909,Enhancers_Heart_10910,Enhancers_Heart_10929,Enhancers_Heart_10930,Enhancers_Heart_10931,Enhancers_Heart_20479,Enhancers_Heart_24673,Enhancers_Heart_26195,Enhancers_Heart_26212,Enhancers_Heart_26213,Enhancers_Heart_26227,Enhancers_Heart_26239,Enhancers_Heart_26247,Enhancers_Heart_26248,Enhancers_Heart_30228,Enhancers_Heart_30232,Enhancers_Heart_30235,Enh…
												Enhancers_Heart_11533,Enhancers_Heart_11534,Enhancers_Heart_11547,Enhancers_Heart_11551,Enhancers_Heart_26153,Enhancers_Heart_26154,Enhancers_Heart_26155,Enhancers_Heart_26156,Enhancers_Heart_26161,Enhancers_Heart_26176,Enhancers_Heart_26195,Enhancers_Heart_26212,Enhancers_Heart_26213,Enhancers_Heart_26227,Enhancers_Heart_26239,Enhancers_Heart_26247,Enhancers_Heart_26248,Enhancers_Heart_29061,Enh…
												Enhancers_Heart_10907,Enhancers_Heart_10909,Enhancers_Heart_10910,Enhancers_Heart_10929,Enhancers_Heart_10930,Enhancers_Heart_10931,Enhancers_Heart_11726,Enhancers_Heart_14919,Enhancers_Heart_19978,Enhancers_Heart_19980,Enhancers_Heart_19984,Enhancers_Heart_19985,Enhancers_Heart_19996,Enhancers_Heart_19997,Enhancers_Heart_20007,Enhancers_Heart_20013,Enhancers_Heart_20015,Enhancers_Heart_20023,Enh…
												Enhancers_Heart_10078,Enhancers_Heart_10907,Enhancers_Heart_10909,Enhancers_Heart_10910,Enhancers_Heart_10929,Enhancers_Heart_10930,Enhancers_Heart_10931,Enhancers_Heart_11001,Enhancers_Heart_11533,Enhancers_Heart_11534,Enhancers_Heart_11547,Enhancers_Heart_11551,Enhancers_Heart_12078,Enhancers_Heart_12372,Enhancers_Heart_12586,Enhancers_Heart_12593,Enhancers_Heart_13490,Enhancers_Heart_13495,Enh…
												Enhancers_Heart_104,Enhancers_Heart_10907,Enhancers_Heart_10909,Enhancers_Heart_10910,Enhancers_Heart_10929,Enhancers_Heart_10930,Enhancers_Heart_10931,Enhancers_Heart_12127,Enhancers_Heart_12593,Enhancers_Heart_12615,Enhancers_Heart_129,Enhancers_Heart_13255,Enhancers_Heart_13265,Enhancers_Heart_17274,Enhancers_Heart_20305,Enhancers_Heart_20405,Enhancers_Heart_21078,Enhancers_Heart_21108,Enhance…
												Enhancers_Heart_104,Enhancers_Heart_10572,Enhancers_Heart_12372,Enhancers_Heart_129,Enhancers_Heart_14466,Enhancers_Heart_14919,Enhancers_Heart_15623,Enhancers_Heart_15851,Enhancers_Heart_16690,Enhancers_Heart_16761,Enhancers_Heart_16764,Enhancers_Heart_16884,Enhancers_Heart_16885,Enhancers_Heart_17154,Enhancers_Heart_17696,Enhancers_Heart_18073,Enhancers_Heart_1877,Enhancers_Heart_19615,Enhancer…
												Enhancers_Heart_10078,Enhancers_Heart_104,Enhancers_Heart_10572,Enhancers_Heart_10907,Enhancers_Heart_10909,Enhancers_Heart_10910,Enhancers_Heart_10929,Enhancers_Heart_10930,Enhancers_Heart_10931,Enhancers_Heart_11001,Enhancers_Heart_11906,Enhancers_Heart_11910,Enhancers_Heart_12372,Enhancers_Heart_12593,Enhancers_Heart_12615,Enhancers_Heart_129,Enhancers_Heart_13255,Enhancers_Heart_13265,Enhance…
												Enhancers_Heart_15590,Enhancers_Heart_15623,Enhancers_Heart_20060,Enhancers_Heart_20064,Enhancers_Heart_20085,Enhancers_Heart_22502,Enhancers_Heart_22546,Enhancers_Heart_22551,Enhancers_Heart_22561,Enhancers_Heart_22569,Enhancers_Heart_25124,Enhancers_Heart_25126,Enhancers_Heart_25127,Enhancers_Heart_25395,Enhancers_Heart_28481,Enhancers_Heart_28486,Enhancers_Heart_28496,Enhancers_Heart_28512,Enh…
												Enhancers_Heart_10907,Enhancers_Heart_10909,Enhancers_Heart_10910,Enhancers_Heart_10929,Enhancers_Heart_10930,Enhancers_Heart_10931,Enhancers_Heart_12078,Enhancers_Heart_12093,Enhancers_Heart_13168,Enhancers_Heart_15623,Enhancers_Heart_20762,Enhancers_Heart_20764,Enhancers_Heart_20765,Enhancers_Heart_20767,Enhancers_Heart_22185,Enhancers_Heart_22200,Enhancers_Heart_23852,Enhancers_Heart_2407,Enha…
												Enhancers_Heart_10078,Enhancers_Heart_12372,Enhancers_Heart_15729,Enhancers_Heart_15730,Enhancers_Heart_23438,Enhancers_Heart_23443,Enhancers_Heart_23469,Enhancers_Heart_23492,Enhancers_Heart_23512,Enhancers_Heart_23516,Enhancers_Heart_23522,Enhancers_Heart_23532,Enhancers_Heart_23536,Enhancers_Heart_23548,Enhancers_Heart_23550,Enhancers_Heart_23560,Enhancers_Heart_25330,Enhancers_Heart_2660,Enha…
												Enhancers_Heart_12372,Enhancers_Heart_13255,Enhancers_Heart_13265,Enhancers_Heart_14919,Enhancers_Heart_16324,Enhancers_Heart_24673,Enhancers_Heart_28319,Enhancers_Heart_28320,Enhancers_Heart_28323,Enhancers_Heart_28329,Enhancers_Heart_28339,Enhancers_Heart_28340,Enhancers_Heart_28382,Enhancers_Heart_28481,Enhancers_Heart_28486,Enhancers_Heart_28496,Enhancers_Heart_29061,Enhancers_Heart_29065,Enh…
												Enhancers_Heart_10572,Enhancers_Heart_10829,Enhancers_Heart_10833,Enhancers_Heart_10864,Enhancers_Heart_10865,Enhancers_Heart_10907,Enhancers_Heart_10909,Enhancers_Heart_10910,Enhancers_Heart_10929,Enhancers_Heart_10930,Enhancers_Heart_10931,Enhancers_Heart_11563,Enhancers_Heart_11573,Enhancers_Heart_11609,Enhancers_Heart_11612,Enhancers_Heart_11640,Enhancers_Heart_11641,Enhancers_Heart_11906,Enh…
												Enhancers_Heart_23765,Enhancers_Heart_27832,Enhancers_Heart_27833,Enhancers_Heart_27834,Enhancers_Heart_27845,Enhancers_Heart_27846,Enhancers_Heart_27869,Enhancers_Heart_27870,Enhancers_Heart_27884,Enhancers_Heart_27886,Enhancers_Heart_27887,Enhancers_Heart_27895,Enhancers_Heart_27899,Enhancers_Heart_27923,Enhancers_Heart_27925,Enhancers_Heart_29719,Enhancers_Heart_3513,Enhancers_Heart_3524,Enhan…
												Enhancers_Heart_11001,Enhancers_Heart_11533,Enhancers_Heart_11534,Enhancers_Heart_11547,Enhancers_Heart_11551,Enhancers_Heart_14990,Enhancers_Heart_15623,Enhancers_Heart_17084,Enhancers_Heart_19404,Enhancers_Heart_19406,Enhancers_Heart_19432,Enhancers_Heart_19434,Enhancers_Heart_19438,Enhancers_Heart_19978,Enhancers_Heart_19980,Enhancers_Heart_19984,Enhancers_Heart_19985,Enhancers_Heart_19996,Enh…
												Enhancers_Heart_10907,Enhancers_Heart_10909,Enhancers_Heart_10910,Enhancers_Heart_10929,Enhancers_Heart_10930,Enhancers_Heart_10931,Enhancers_Heart_12354,Enhancers_Heart_12372,Enhancers_Heart_14919,Enhancers_Heart_1967,Enhancers_Heart_20291,Enhancers_Heart_20305,Enhancers_Heart_26195,Enhancers_Heart_26212,Enhancers_Heart_26213,Enhancers_Heart_26227,Enhancers_Heart_26239,Enhancers_Heart_26247,Enha…
												Enhancers_Heart_12078,Enhancers_Heart_16361,Enhancers_Heart_20479,Enhancers_Heart_22502,Enhancers_Heart_22546,Enhancers_Heart_22551,Enhancers_Heart_22561,Enhancers_Heart_22569,Enhancers_Heart_24673,Enhancers_Heart_25124,Enhancers_Heart_25126,Enhancers_Heart_25127,Enhancers_Heart_26071,Enhancers_Heart_26072,Enhancers_Heart_26083,Enhancers_Heart_29220,Enhancers_Heart_29243,Enhancers_Heart_29252,Enh…
												Enhancers_Heart_10907,Enhancers_Heart_10909,Enhancers_Heart_10910,Enhancers_Heart_10929,Enhancers_Heart_10930,Enhancers_Heart_10931,Enhancers_Heart_11001,Enhancers_Heart_11533,Enhancers_Heart_11534,Enhancers_Heart_11547,Enhancers_Heart_11551,Enhancers_Heart_14990,Enhancers_Heart_15046,Enhancers_Heart_15048,Enhancers_Heart_15049,Enhancers_Heart_15055,Enhancers_Heart_15056,Enhancers_Heart_15623,Enh…
												Enhancers_Heart_10907,Enhancers_Heart_10909,Enhancers_Heart_10910,Enhancers_Heart_10929,Enhancers_Heart_10930,Enhancers_Heart_10931,Enhancers_Heart_12078,Enhancers_Heart_12093,Enhancers_Heart_21078,Enhancers_Heart_21108,Enhancers_Heart_21114,Enhancers_Heart_21123,Enhancers_Heart_21125,Enhancers_Heart_21141,Enhancers_Heart_21915,Enhancers_Heart_22185,Enhancers_Heart_22200,Enhancers_Heart_2407,Enha…
												Enhancers_Heart_18459,Enhancers_Heart_18469,Enhancers_Heart_18534,Enhancers_Heart_18546,Enhancers_Heart_27772,Enhancers_Heart_29061,Enhancers_Heart_29065,Enhancers_Heart_29084,Enhancers_Heart_29220,Enhancers_Heart_29243,Enhancers_Heart_29252,Enhancers_Heart_29421,Enhancers_Heart_29422,Enhancers_Heart_29423,Enhancers_Heart_29424,Enhancers_Heart_32896,Enhancers_Heart_32901,Enhancers_Heart_32931,Enh…
												Enhancers_Heart_10108,Enhancers_Heart_10829,Enhancers_Heart_10833,Enhancers_Heart_12078,Enhancers_Heart_14919,Enhancers_Heart_15623,Enhancers_Heart_16438,Enhancers_Heart_17084,Enhancers_Heart_17576,Enhancers_Heart_19874,Enhancers_Heart_21390,Enhancers_Heart_21402,Enhancers_Heart_21915,Enhancers_Heart_24086,Enhancers_Heart_24094,Enhancers_Heart_24095,Enhancers_Heart_24891,Enhancers_Heart_25292,Enh…
												Enhancers_Heart_10907,Enhancers_Heart_10909,Enhancers_Heart_10910,Enhancers_Heart_10929,Enhancers_Heart_10930,Enhancers_Heart_10931,Enhancers_Heart_11640,Enhancers_Heart_11641,Enhancers_Heart_11726,Enhancers_Heart_16761,Enhancers_Heart_16764,Enhancers_Heart_19978,Enhancers_Heart_19980,Enhancers_Heart_19984,Enhancers_Heart_19985,Enhancers_Heart_19996,Enhancers_Heart_19997,Enhancers_Heart_20007,Enh…
												Enhancers_Heart_10907,Enhancers_Heart_10909,Enhancers_Heart_10910,Enhancers_Heart_10929,Enhancers_Heart_10930,Enhancers_Heart_10931,Enhancers_Heart_11533,Enhancers_Heart_11534,Enhancers_Heart_11547,Enhancers_Heart_11551,Enhancers_Heart_18073,Enhancers_Heart_21078,Enhancers_Heart_21108,Enhancers_Heart_21114,Enhancers_Heart_21123,Enhancers_Heart_21125,Enhancers_Heart_21141,Enhancers_Heart_26153,Enh…
												Enhancers_Heart_10698,Enhancers_Heart_10710,Enhancers_Heart_10729,Enhancers_Heart_12078,Enhancers_Heart_12622,Enhancers_Heart_12623,Enhancers_Heart_13424,Enhancers_Heart_13431,Enhancers_Heart_13455,Enhancers_Heart_13464,Enhancers_Heart_15623,Enhancers_Heart_16620,Enhancers_Heart_17134,Enhancers_Heart_19404,Enhancers_Heart_19406,Enhancers_Heart_19432,Enhancers_Heart_19434,Enhancers_Heart_19438,Enh…
												Enhancers_Heart_10078,Enhancers_Heart_10108,Enhancers_Heart_13075,Enhancers_Heart_13080,Enhancers_Heart_17154,Enhancers_Heart_23765,Enhancers_Heart_23910,Enhancers_Heart_23933,Enhancers_Heart_24086,Enhancers_Heart_24094,Enhancers_Heart_24095,Enhancers_Heart_26806,Enhancers_Heart_26841,Enhancers_Heart_26856,Enhancers_Heart_26857,Enhancers_Heart_26861,Enhancers_Heart_26886,Enhancers_Heart_26888,Enh…
												Enhancers_Heart_10907,Enhancers_Heart_10909,Enhancers_Heart_10910,Enhancers_Heart_10929,Enhancers_Heart_10930,Enhancers_Heart_10931,Enhancers_Heart_11640,Enhancers_Heart_11641,Enhancers_Heart_11906,Enhancers_Heart_11910,Enhancers_Heart_12078,Enhancers_Heart_13255,Enhancers_Heart_13265,Enhancers_Heart_14365,Enhancers_Heart_1615,Enhancers_Heart_16178,Enhancers_Heart_16181,Enhancers_Heart_16324,Enha…
												Enhancers_Heart_10907,Enhancers_Heart_10909,Enhancers_Heart_10910,Enhancers_Heart_10929,Enhancers_Heart_10930,Enhancers_Heart_10931,Enhancers_Heart_12078,Enhancers_Heart_12093,Enhancers_Heart_13168,Enhancers_Heart_15623,Enhancers_Heart_20762,Enhancers_Heart_20764,Enhancers_Heart_20765,Enhancers_Heart_20767,Enhancers_Heart_22185,Enhancers_Heart_22200,Enhancers_Heart_23852,Enhancers_Heart_2407,Enha…
												Enhancers_Heart_11726,Enhancers_Heart_15211,Enhancers_Heart_19978,Enhancers_Heart_19980,Enhancers_Heart_19984,Enhancers_Heart_19985,Enhancers_Heart_19996,Enhancers_Heart_19997,Enhancers_Heart_20007,Enhancers_Heart_20013,Enhancers_Heart_20015,Enhancers_Heart_20023,Enhancers_Heart_20048,Enhancers_Heart_20204,Enhancers_Heart_20209,Enhancers_Heart_20217,Enhancers_Heart_20228,Enhancers_Heart_20230,Enh…
												Enhancers_Heart_11640,Enhancers_Heart_11641,Enhancers_Heart_14294,Enhancers_Heart_18308,Enhancers_Heart_18309,Enhancers_Heart_18459,Enhancers_Heart_18469,Enhancers_Heart_18534,Enhancers_Heart_18546,Enhancers_Heart_20060,Enhancers_Heart_20064,Enhancers_Heart_20085,Enhancers_Heart_21078,Enhancers_Heart_21108,Enhancers_Heart_21114,Enhancers_Heart_21123,Enhancers_Heart_21125,Enhancers_Heart_21141,Enh…
												Enhancers_Heart_10108,Enhancers_Heart_10829,Enhancers_Heart_10833,Enhancers_Heart_12078,Enhancers_Heart_14919,Enhancers_Heart_15623,Enhancers_Heart_16438,Enhancers_Heart_19874,Enhancers_Heart_21390,Enhancers_Heart_21402,Enhancers_Heart_21915,Enhancers_Heart_24086,Enhancers_Heart_24094,Enhancers_Heart_24095,Enhancers_Heart_24891,Enhancers_Heart_25292,Enhancers_Heart_25495,Enhancers_Heart_28027,Enh…
												Enhancers_Heart_12127,Enhancers_Heart_13255,Enhancers_Heart_13265,Enhancers_Heart_17274,Enhancers_Heart_20405,Enhancers_Heart_21078,Enhancers_Heart_21108,Enhancers_Heart_21114,Enhancers_Heart_21123,Enhancers_Heart_21125,Enhancers_Heart_21141,Enhancers_Heart_22032,Enhancers_Heart_23358,Enhancers_Heart_23375,Enhancers_Heart_23376,Enhancers_Heart_23377,Enhancers_Heart_23378,Enhancers_Heart_28695,Enh…
												Enhancers_Heart_10078,Enhancers_Heart_12372,Enhancers_Heart_1607,Enhancers_Heart_16324,Enhancers_Heart_2022,Enhancers_Heart_2024,Enhancers_Heart_2030,Enhancers_Heart_20705,Enhancers_Heart_2083,Enhancers_Heart_21642,Enhancers_Heart_24086,Enhancers_Heart_24094,Enhancers_Heart_24095,Enhancers_Heart_26806,Enhancers_Heart_26841,Enhancers_Heart_26856,Enhancers_Heart_26857,Enhancers_Heart_26861,Enhancer…
												Enhancers_Heart_10078,Enhancers_Heart_10108,Enhancers_Heart_10208,Enhancers_Heart_1078,Enhancers_Heart_1087,Enhancers_Heart_10949,Enhancers_Heart_10980,Enhancers_Heart_10981,Enhancers_Heart_10983,Enhancers_Heart_11001,Enhancers_Heart_13290,Enhancers_Heart_13529,Enhancers_Heart_13532,Enhancers_Heart_13533,Enhancers_Heart_13552,Enhancers_Heart_13557,Enhancers_Heart_15169,Enhancers_Heart_15623,Enhan…
												Enhancers_Heart_10108,Enhancers_Heart_10219,Enhancers_Heart_10829,Enhancers_Heart_10833,Enhancers_Heart_10864,Enhancers_Heart_10865,Enhancers_Heart_10948,Enhancers_Heart_11299,Enhancers_Heart_11563,Enhancers_Heart_11573,Enhancers_Heart_11609,Enhancers_Heart_11612,Enhancers_Heart_11844,Enhancers_Heart_11883,Enhancers_Heart_11885,Enhancers_Heart_12078,Enhancers_Heart_12127,Enhancers_Heart_12354,Enh…
												Enhancers_Heart_104,Enhancers_Heart_129,Enhancers_Heart_20405,Enhancers_Heart_20601,Enhancers_Heart_20606,Enhancers_Heart_20610,Enhancers_Heart_21078,Enhancers_Heart_21108,Enhancers_Heart_21114,Enhancers_Heart_21123,Enhancers_Heart_21125,Enhancers_Heart_21141,Enhancers_Heart_22032,Enhancers_Heart_29220,Enhancers_Heart_29243,Enhancers_Heart_29252,Enhancers_Heart_29719,Enhancers_Heart_30210,Enhance…
												Enhancers_Heart_10208,Enhancers_Heart_12354,Enhancers_Heart_19404,Enhancers_Heart_19406,Enhancers_Heart_19432,Enhancers_Heart_19434,Enhancers_Heart_19438,Enhancers_Heart_22091,Enhancers_Heart_22095,Enhancers_Heart_28695,Enhancers_Heart_28697,Enhancers_Heart_28698,Enhancers_Heart_32388,Enhancers_Heart_32815,Enhancers_Heart_32844,Enhancers_Heart_32850,Enhancers_Heart_32851,Enhancers_Heart_32852,Enh…
												Enhancers_Heart_18651,Enhancers_Heart_20705,Enhancers_Heart_28695,Enhancers_Heart_28697,Enhancers_Heart_28698,Enhancers_Heart_34345,Enhancers_Heart_41823,Enhancers_Heart_50367,Enhancers_Heart_53641,Enhancers_Heart_58141,Enhancers_Heart_58146,Enhancers_Heart_58147,Enhancers_Heart_58153,Enhancers_Heart_78023,Enhancers_Heart_78037,Enhancers_Heart_80900,Enhancers_Heart_80923,Enhancers_Heart_80924,Enh…
												Enhancers_Heart_10078,Enhancers_Heart_12372,Enhancers_Heart_15729,Enhancers_Heart_15730,Enhancers_Heart_36563,Enhancers_Heart_80529,Enhancers_Heart_80708,Enhancers_Heart_9234,Enhancers_Heart_9243,Enhancers_Heart_9246,Enhancers_Heart_9248,Enhancers_Heart_9270
												Enhancers_Heart_10698,Enhancers_Heart_10710,Enhancers_Heart_10729,Enhancers_Heart_12078,Enhancers_Heart_13424,Enhancers_Heart_13431,Enhancers_Heart_13455,Enhancers_Heart_13464,Enhancers_Heart_17134,Enhancers_Heart_19404,Enhancers_Heart_19406,Enhancers_Heart_19432,Enhancers_Heart_19434,Enhancers_Heart_19438,Enhancers_Heart_20060,Enhancers_Heart_20064,Enhancers_Heart_20085,Enhancers_Heart_21308,Enh…
												Enhancers_Heart_10208,Enhancers_Heart_1078,Enhancers_Heart_10829,Enhancers_Heart_10833,Enhancers_Heart_1087,Enhancers_Heart_11299,Enhancers_Heart_12127,Enhancers_Heart_12333,Enhancers_Heart_13455,Enhancers_Heart_13464,Enhancers_Heart_13490,Enhancers_Heart_13495,Enhancers_Heart_13666,Enhancers_Heart_15169,Enhancers_Heart_16074,Enhancers_Heart_16108,Enhancers_Heart_16176,Enhancers_Heart_19608,Enhan…
												Enhancers_Heart_104,Enhancers_Heart_11533,Enhancers_Heart_11534,Enhancers_Heart_11547,Enhancers_Heart_11551,Enhancers_Heart_129,Enhancers_Heart_14365,Enhancers_Heart_14919,Enhancers_Heart_14990,Enhancers_Heart_14995,Enhancers_Heart_14997,Enhancers_Heart_16324,Enhancers_Heart_17274,Enhancers_Heart_17672,Enhancers_Heart_18011,Enhancers_Heart_18014,Enhancers_Heart_18015,Enhancers_Heart_18039,Enhance…
												Enhancers_Heart_2186,Enhancers_Heart_28795,Enhancers_Heart_29061,Enhancers_Heart_29065,Enhancers_Heart_29084,Enhancers_Heart_29220,Enhancers_Heart_29243,Enhancers_Heart_29252,Enhancers_Heart_29581,Enhancers_Heart_36199,Enhancers_Heart_41012,Enhancers_Heart_41047,Enhancers_Heart_42601,Enhancers_Heart_42606,Enhancers_Heart_42608,Enhancers_Heart_42611,Enhancers_Heart_42612,Enhancers_Heart_42613,Enha…
												Enhancers_Heart_10907,Enhancers_Heart_10909,Enhancers_Heart_10910,Enhancers_Heart_10929,Enhancers_Heart_10930,Enhancers_Heart_10931,Enhancers_Heart_11640,Enhancers_Heart_11641,Enhancers_Heart_13255,Enhancers_Heart_13265,Enhancers_Heart_17154,Enhancers_Heart_19874,Enhancers_Heart_19882,Enhancers_Heart_19889,Enhancers_Heart_22378,Enhancers_Heart_22380,Enhancers_Heart_22381,Enhancers_Heart_23391,Enh…
												Enhancers_Heart_44364,Enhancers_Heart_44369,Enhancers_Heart_44377,Enhancers_Heart_44387,Enhancers_Heart_44388,Enhancers_Heart_44409,Enhancers_Heart_44443,Enhancers_Heart_44444,Enhancers_Heart_46746,Enhancers_Heart_53519,Enhancers_Heart_53524,Enhancers_Heart_53536,Enhancers_Heart_54561,Enhancers_Heart_54568,Enhancers_Heart_64034,Enhancers_Heart_64036,Enhancers_Heart_6756,Enhancers_Heart_81841,Enha…
												Enhancers_Heart_15623,Enhancers_Heart_1967,Enhancers_Heart_19874,Enhancers_Heart_19882,Enhancers_Heart_19889,Enhancers_Heart_20060,Enhancers_Heart_20064,Enhancers_Heart_20085,Enhancers_Heart_20479,Enhancers_Heart_21489,Enhancers_Heart_21545,Enhancers_Heart_21547,Enhancers_Heart_26806,Enhancers_Heart_26841,Enhancers_Heart_26856,Enhancers_Heart_26857,Enhancers_Heart_26861,Enhancers_Heart_26886,Enha…
												Enhancers_Heart_12078,Enhancers_Heart_20479,Enhancers_Heart_22502,Enhancers_Heart_22546,Enhancers_Heart_22551,Enhancers_Heart_22561,Enhancers_Heart_22569,Enhancers_Heart_24673,Enhancers_Heart_25663,Enhancers_Heart_26195,Enhancers_Heart_26212,Enhancers_Heart_26213,Enhancers_Heart_26227,Enhancers_Heart_26239,Enhancers_Heart_26247,Enhancers_Heart_26248,Enhancers_Heart_26358,Enhancers_Heart_26361,Enh…
												Enhancers_Heart_10829,Enhancers_Heart_10833,Enhancers_Heart_10864,Enhancers_Heart_10865,Enhancers_Heart_10907,Enhancers_Heart_10909,Enhancers_Heart_10910,Enhancers_Heart_10929,Enhancers_Heart_10930,Enhancers_Heart_10931,Enhancers_Heart_11563,Enhancers_Heart_11573,Enhancers_Heart_11609,Enhancers_Heart_11612,Enhancers_Heart_11906,Enhancers_Heart_11910,Enhancers_Heart_12372,Enhancers_Heart_12593,Enh…
												Enhancers_Heart_11533,Enhancers_Heart_11534,Enhancers_Heart_11547,Enhancers_Heart_11551,Enhancers_Heart_26153,Enhancers_Heart_26154,Enhancers_Heart_26155,Enhancers_Heart_26156,Enhancers_Heart_26161,Enhancers_Heart_26176,Enhancers_Heart_26195,Enhancers_Heart_26212,Enhancers_Heart_26213,Enhancers_Heart_26227,Enhancers_Heart_26239,Enhancers_Heart_26247,Enhancers_Heart_26248,Enhancers_Heart_29061,Enh…
												Enhancers_Heart_104,Enhancers_Heart_12127,Enhancers_Heart_12593,Enhancers_Heart_12615,Enhancers_Heart_129,Enhancers_Heart_13255,Enhancers_Heart_13265,Enhancers_Heart_17274,Enhancers_Heart_20405,Enhancers_Heart_21078,Enhancers_Heart_21108,Enhancers_Heart_21114,Enhancers_Heart_21123,Enhancers_Heart_21125,Enhancers_Heart_21141,Enhancers_Heart_22032,Enhancers_Heart_22200,Enhancers_Heart_22650,Enhance…
												Enhancers_Heart_17274,Enhancers_Heart_18039,Enhancers_Heart_18045,Enhancers_Heart_18046,Enhancers_Heart_18049,Enhancers_Heart_18057,Enhancers_Heart_18058,Enhancers_Heart_20479,Enhancers_Heart_25475,Enhancers_Heart_29948,Enhancers_Heart_29958,Enhancers_Heart_30408,Enhancers_Heart_37004,Enhancers_Heart_37005,Enhancers_Heart_48911,Enhancers_Heart_48914,Enhancers_Heart_48916,Enhancers_Heart_48919,Enh…
												Enhancers_Heart_18039,Enhancers_Heart_18045,Enhancers_Heart_18046,Enhancers_Heart_18049,Enhancers_Heart_18057,Enhancers_Heart_18058,Enhancers_Heart_20479,Enhancers_Heart_28265,Enhancers_Heart_28271,Enhancers_Heart_28291,Enhancers_Heart_28292,Enhancers_Heart_42601,Enhancers_Heart_42606,Enhancers_Heart_42608,Enhancers_Heart_42611,Enhancers_Heart_42612,Enhancers_Heart_42613,Enhancers_Heart_4560,Enha…
												Enhancers_Heart_20060,Enhancers_Heart_20064,Enhancers_Heart_20085,Enhancers_Heart_21078,Enhancers_Heart_21108,Enhancers_Heart_21114,Enhancers_Heart_21123,Enhancers_Heart_21125,Enhancers_Heart_21141,Enhancers_Heart_29061,Enhancers_Heart_29065,Enhancers_Heart_29084,Enhancers_Heart_29719,Enhancers_Heart_29948,Enhancers_Heart_29958,Enhancers_Heart_32692,Enhancers_Heart_32693,Enhancers_Heart_32715,Enh…
												Enhancers_Heart_10108,Enhancers_Heart_10219,Enhancers_Heart_10829,Enhancers_Heart_10833,Enhancers_Heart_10864,Enhancers_Heart_10865,Enhancers_Heart_10948,Enhancers_Heart_11299,Enhancers_Heart_11563,Enhancers_Heart_11573,Enhancers_Heart_11609,Enhancers_Heart_11612,Enhancers_Heart_11844,Enhancers_Heart_11883,Enhancers_Heart_11885,Enhancers_Heart_12078,Enhancers_Heart_12127,Enhancers_Heart_12354,Enh…
												Enhancers_Heart_13529,Enhancers_Heart_13532,Enhancers_Heart_13533,Enhancers_Heart_13552,Enhancers_Heart_13557,Enhancers_Heart_15623,Enhancers_Heart_1607,Enhancers_Heart_16438,Enhancers_Heart_22111,Enhancers_Heart_22115,Enhancers_Heart_22118,Enhancers_Heart_22378,Enhancers_Heart_22380,Enhancers_Heart_22381,Enhancers_Heart_22920,Enhancers_Heart_25475,Enhancers_Heart_26806,Enhancers_Heart_26841,Enha…
												Enhancers_Heart_10078,Enhancers_Heart_10108,Enhancers_Heart_10949,Enhancers_Heart_13290,Enhancers_Heart_13529,Enhancers_Heart_13532,Enhancers_Heart_13533,Enhancers_Heart_13552,Enhancers_Heart_13557,Enhancers_Heart_15169,Enhancers_Heart_15623,Enhancers_Heart_15813,Enhancers_Heart_15851,Enhancers_Heart_1607,Enhancers_Heart_16438,Enhancers_Heart_17576,Enhancers_Heart_18,Enhancers_Heart_19304,Enhance…
												Enhancers_Heart_10078,Enhancers_Heart_104,Enhancers_Heart_11906,Enhancers_Heart_11910,Enhancers_Heart_12372,Enhancers_Heart_129,Enhancers_Heart_14466,Enhancers_Heart_14919,Enhancers_Heart_15729,Enhancers_Heart_15730,Enhancers_Heart_16176,Enhancers_Heart_17274,Enhancers_Heart_1877,Enhancers_Heart_1967,Enhancers_Heart_20142,Enhancers_Heart_20144,Enhancers_Heart_20172,Enhancers_Heart_20183,Enhancers…
												Enhancers_Heart_10078,Enhancers_Heart_104,Enhancers_Heart_11906,Enhancers_Heart_11910,Enhancers_Heart_12372,Enhancers_Heart_129,Enhancers_Heart_14466,Enhancers_Heart_14919,Enhancers_Heart_15729,Enhancers_Heart_15730,Enhancers_Heart_16176,Enhancers_Heart_17274,Enhancers_Heart_1877,Enhancers_Heart_1967,Enhancers_Heart_20142,Enhancers_Heart_20144,Enhancers_Heart_20172,Enhancers_Heart_20183,Enhancers…
												Enhancers_Heart_30098,Enhancers_Heart_33033,Enhancers_Heart_33034,Enhancers_Heart_33053,Enhancers_Heart_33055,Enhancers_Heart_33101,Enhancers_Heart_33102,Enhancers_Heart_33104,Enhancers_Heart_45873,Enhancers_Heart_45901,Enhancers_Heart_467,Enhancers_Heart_54116,Enhancers_Heart_71005,Enhancers_Heart_84390,Enhancers_Heart_84396,Enhancers_Heart_84405,Enhancers_Heart_84429,Enhancers_Heart_84432,Enhan…
												Enhancers_Heart_10219,Enhancers_Heart_10907,Enhancers_Heart_10909,Enhancers_Heart_10910,Enhancers_Heart_10929,Enhancers_Heart_10930,Enhancers_Heart_10931,Enhancers_Heart_10948,Enhancers_Heart_11001,Enhancers_Heart_1134,Enhancers_Heart_11533,Enhancers_Heart_11534,Enhancers_Heart_11547,Enhancers_Heart_11551,Enhancers_Heart_11691,Enhancers_Heart_11692,Enhancers_Heart_11696,Enhancers_Heart_11698,Enha…
												Enhancers_Heart_10108,Enhancers_Heart_10219,Enhancers_Heart_10829,Enhancers_Heart_10833,Enhancers_Heart_10864,Enhancers_Heart_10865,Enhancers_Heart_10948,Enhancers_Heart_11299,Enhancers_Heart_11563,Enhancers_Heart_11573,Enhancers_Heart_11609,Enhancers_Heart_11612,Enhancers_Heart_11844,Enhancers_Heart_11883,Enhancers_Heart_11885,Enhancers_Heart_12078,Enhancers_Heart_12127,Enhancers_Heart_12354,Enh…
												Enhancers_Heart_14474,Enhancers_Heart_15565,Enhancers_Heart_15570,Enhancers_Heart_15572,Enhancers_Heart_15623,Enhancers_Heart_16690,Enhancers_Heart_18331,Enhancers_Heart_18332,Enhancers_Heart_21489,Enhancers_Heart_21545,Enhancers_Heart_21547,Enhancers_Heart_2186,Enhancers_Heart_22111,Enhancers_Heart_22115,Enhancers_Heart_22118,Enhancers_Heart_22185,Enhancers_Heart_22200,Enhancers_Heart_22885,Enha…
												Enhancers_Heart_10572,Enhancers_Heart_12372,Enhancers_Heart_14466,Enhancers_Heart_14919,Enhancers_Heart_16761,Enhancers_Heart_16764,Enhancers_Heart_16884,Enhancers_Heart_16885,Enhancers_Heart_19615,Enhancers_Heart_19616,Enhancers_Heart_20863,Enhancers_Heart_22111,Enhancers_Heart_22115,Enhancers_Heart_22118,Enhancers_Heart_28596,Enhancers_Heart_31379,Enhancers_Heart_31380,Enhancers_Heart_34853,Enh…
												Enhancers_Heart_30483,Enhancers_Heart_3548,Enhancers_Heart_3549,Enhancers_Heart_3550,Enhancers_Heart_66569,Enhancers_Heart_66571,Enhancers_Heart_92590,Enhancers_Heart_92598,Enhancers_Heart_92600,Enhancers_Heart_92602,Enhancers_Heart_92603,Enhancers_Heart_92604
												Enhancers_Heart_15623,Enhancers_Heart_1615,Enhancers_Heart_1639,Enhancers_Heart_1673,Enhancers_Heart_1677,Enhancers_Heart_1678,Enhancers_Heart_20405,Enhancers_Heart_22032,Enhancers_Heart_31379,Enhancers_Heart_31380,Enhancers_Heart_36563,Enhancers_Heart_38221,Enhancers_Heart_39682,Enhancers_Heart_39696,Enhancers_Heart_39698,Enhancers_Heart_41012,Enhancers_Heart_41047,Enhancers_Heart_42152,Enhancer…
												Enhancers_Heart_10219,Enhancers_Heart_10948,Enhancers_Heart_11533,Enhancers_Heart_11534,Enhancers_Heart_11547,Enhancers_Heart_11551,Enhancers_Heart_11691,Enhancers_Heart_11692,Enhancers_Heart_11696,Enhancers_Heart_11698,Enhancers_Heart_11699,Enhancers_Heart_11717,Enhancers_Heart_13424,Enhancers_Heart_13431,Enhancers_Heart_14365,Enhancers_Heart_15382,Enhancers_Heart_16176,Enhancers_Heart_202,Enhan…
												Enhancers_Heart_14311,Enhancers_Heart_26195,Enhancers_Heart_26212,Enhancers_Heart_26213,Enhancers_Heart_26227,Enhancers_Heart_26239,Enhancers_Heart_26247,Enhancers_Heart_26248,Enhancers_Heart_28695,Enhancers_Heart_28697,Enhancers_Heart_28698,Enhancers_Heart_29948,Enhancers_Heart_29958,Enhancers_Heart_33563,Enhancers_Heart_33564,Enhancers_Heart_3799,Enhancers_Heart_48044,Enhancers_Heart_54298,Enha…
												Enhancers_Heart_10219,Enhancers_Heart_10948,Enhancers_Heart_11533,Enhancers_Heart_11534,Enhancers_Heart_11547,Enhancers_Heart_11551,Enhancers_Heart_11691,Enhancers_Heart_11692,Enhancers_Heart_11696,Enhancers_Heart_11698,Enhancers_Heart_11699,Enhancers_Heart_11717,Enhancers_Heart_13424,Enhancers_Heart_13431,Enhancers_Heart_14365,Enhancers_Heart_15382,Enhancers_Heart_16176,Enhancers_Heart_202,Enhan…
												Enhancers_Heart_10078,Enhancers_Heart_10108,Enhancers_Heart_10949,Enhancers_Heart_12372,Enhancers_Heart_13290,Enhancers_Heart_13529,Enhancers_Heart_13532,Enhancers_Heart_13533,Enhancers_Heart_13552,Enhancers_Heart_13557,Enhancers_Heart_14919,Enhancers_Heart_15169,Enhancers_Heart_15623,Enhancers_Heart_15813,Enhancers_Heart_15851,Enhancers_Heart_1607,Enhancers_Heart_16324,Enhancers_Heart_16438,Enha…
												Enhancers_Heart_10208,Enhancers_Heart_10829,Enhancers_Heart_10833,Enhancers_Heart_11299,Enhancers_Heart_12333,Enhancers_Heart_13455,Enhancers_Heart_13464,Enhancers_Heart_13490,Enhancers_Heart_13495,Enhancers_Heart_16074,Enhancers_Heart_16176,Enhancers_Heart_19608,Enhancers_Heart_19615,Enhancers_Heart_19616,Enhancers_Heart_20880,Enhancers_Heart_20881,Enhancers_Heart_20882,Enhancers_Heart_20906,Enh…
												Enhancers_Heart_14294,Enhancers_Heart_15623,Enhancers_Heart_24673,Enhancers_Heart_31326,Enhancers_Heart_31327,Enhancers_Heart_33033,Enhancers_Heart_33034,Enhancers_Heart_33053,Enhancers_Heart_33055,Enhancers_Heart_33101,Enhancers_Heart_33102,Enhancers_Heart_33104,Enhancers_Heart_44099,Enhancers_Heart_44103,Enhancers_Heart_44108,Enhancers_Heart_44111,Enhancers_Heart_54116,Enhancers_Heart_55413,Enh…
												Enhancers_Heart_10208,Enhancers_Heart_10907,Enhancers_Heart_10909,Enhancers_Heart_10910,Enhancers_Heart_10929,Enhancers_Heart_10930,Enhancers_Heart_10931,Enhancers_Heart_11640,Enhancers_Heart_11641,Enhancers_Heart_12078,Enhancers_Heart_12593,Enhancers_Heart_12615,Enhancers_Heart_1581,Enhancers_Heart_1607,Enhancers_Heart_16884,Enhancers_Heart_16885,Enhancers_Heart_17004,Enhancers_Heart_17009,Enhan…
												Enhancers_Heart_10078,Enhancers_Heart_10108,Enhancers_Heart_104,Enhancers_Heart_129,Enhancers_Heart_15623,Enhancers_Heart_16884,Enhancers_Heart_16885,Enhancers_Heart_24673,Enhancers_Heart_28265,Enhancers_Heart_28271,Enhancers_Heart_28291,Enhancers_Heart_28292,Enhancers_Heart_29220,Enhancers_Heart_29243,Enhancers_Heart_29252,Enhancers_Heart_30228,Enhancers_Heart_30232,Enhancers_Heart_30235,Enhance…
												Enhancers_Heart_10078,Enhancers_Heart_104,Enhancers_Heart_11906,Enhancers_Heart_11910,Enhancers_Heart_12372,Enhancers_Heart_129,Enhancers_Heart_14466,Enhancers_Heart_14919,Enhancers_Heart_15729,Enhancers_Heart_15730,Enhancers_Heart_16176,Enhancers_Heart_17274,Enhancers_Heart_1877,Enhancers_Heart_1967,Enhancers_Heart_20142,Enhancers_Heart_20144,Enhancers_Heart_20172,Enhancers_Heart_20183,Enhancers…
												Enhancers_Heart_20060,Enhancers_Heart_20064,Enhancers_Heart_20085,Enhancers_Heart_21078,Enhancers_Heart_21108,Enhancers_Heart_21114,Enhancers_Heart_21123,Enhancers_Heart_21125,Enhancers_Heart_21141,Enhancers_Heart_29061,Enhancers_Heart_29065,Enhancers_Heart_29084,Enhancers_Heart_29719,Enhancers_Heart_29948,Enhancers_Heart_29958,Enhancers_Heart_32692,Enhancers_Heart_32693,Enhancers_Heart_32715,Enh…
												Enhancers_Heart_11001,Enhancers_Heart_15623,Enhancers_Heart_2407,Enhancers_Heart_2411,Enhancers_Heart_2418,Enhancers_Heart_2423,Enhancers_Heart_3934,Enhancers_Heart_3935,Enhancers_Heart_49167,Enhancers_Heart_49168,Enhancers_Heart_56735,Enhancers_Heart_68264,Enhancers_Heart_68272,Enhancers_Heart_75367,Enhancers_Heart_83206,Enhancers_Heart_85467,Enhancers_Heart_92205,Enhancers_Heart_92208,Enhancers…
												Enhancers_Heart_10907,Enhancers_Heart_10909,Enhancers_Heart_10910,Enhancers_Heart_10929,Enhancers_Heart_10930,Enhancers_Heart_10931,Enhancers_Heart_11563,Enhancers_Heart_11573,Enhancers_Heart_11609,Enhancers_Heart_11612,Enhancers_Heart_13719,Enhancers_Heart_15787,Enhancers_Heart_16324,Enhancers_Heart_1877,Enhancers_Heart_20060,Enhancers_Heart_20064,Enhancers_Heart_20085,Enhancers_Heart_20479,Enha…
												Enhancers_Heart_24673,Enhancers_Heart_29155,Enhancers_Heart_29158,Enhancers_Heart_29161,Enhancers_Heart_29312,Enhancers_Heart_29323,Enhancers_Heart_29324,Enhancers_Heart_30228,Enhancers_Heart_30232,Enhancers_Heart_30235,Enhancers_Heart_30243,Enhancers_Heart_4560,Enhancers_Heart_49992,Enhancers_Heart_50000,Enhancers_Heart_50001,Enhancers_Heart_57083,Enhancers_Heart_61068,Enhancers_Heart_61080,Enha…
												Enhancers_Heart_104,Enhancers_Heart_11906,Enhancers_Heart_11910,Enhancers_Heart_12127,Enhancers_Heart_12593,Enhancers_Heart_12615,Enhancers_Heart_129,Enhancers_Heart_13255,Enhancers_Heart_13265,Enhancers_Heart_14474,Enhancers_Heart_15217,Enhancers_Heart_1615,Enhancers_Heart_16176,Enhancers_Heart_16324,Enhancers_Heart_1639,Enhancers_Heart_16475,Enhancers_Heart_16690,Enhancers_Heart_1673,Enhancers_…
												Enhancers_Heart_10078,Enhancers_Heart_10108,Enhancers_Heart_10174,Enhancers_Heart_10907,Enhancers_Heart_10909,Enhancers_Heart_10910,Enhancers_Heart_10929,Enhancers_Heart_10930,Enhancers_Heart_10931,Enhancers_Heart_11001,Enhancers_Heart_12078,Enhancers_Heart_14365,Enhancers_Heart_14686,Enhancers_Heart_15729,Enhancers_Heart_15730,Enhancers_Heart_15851,Enhancers_Heart_16176,Enhancers_Heart_17028,Enh…
												Enhancers_Heart_13666,Enhancers_Heart_13676,Enhancers_Heart_13684,Enhancers_Heart_14474,Enhancers_Heart_1615,Enhancers_Heart_16324,Enhancers_Heart_1639,Enhancers_Heart_1673,Enhancers_Heart_1677,Enhancers_Heart_1678,Enhancers_Heart_23349,Enhancers_Heart_27832,Enhancers_Heart_27833,Enhancers_Heart_27834,Enhancers_Heart_27845,Enhancers_Heart_27846,Enhancers_Heart_27869,Enhancers_Heart_27870,Enhancer…
												Enhancers_Heart_10078,Enhancers_Heart_10108,Enhancers_Heart_10949,Enhancers_Heart_12372,Enhancers_Heart_13290,Enhancers_Heart_13529,Enhancers_Heart_13532,Enhancers_Heart_13533,Enhancers_Heart_13552,Enhancers_Heart_13557,Enhancers_Heart_14919,Enhancers_Heart_15623,Enhancers_Heart_15813,Enhancers_Heart_1607,Enhancers_Heart_16324,Enhancers_Heart_16438,Enhancers_Heart_19304,Enhancers_Heart_19305,Enha…
												Enhancers_Heart_10208,Enhancers_Heart_1078,Enhancers_Heart_10829,Enhancers_Heart_10833,Enhancers_Heart_1087,Enhancers_Heart_10907,Enhancers_Heart_10909,Enhancers_Heart_10910,Enhancers_Heart_10929,Enhancers_Heart_10930,Enhancers_Heart_10931,Enhancers_Heart_11299,Enhancers_Heart_12127,Enhancers_Heart_12333,Enhancers_Heart_12354,Enhancers_Heart_13290,Enhancers_Heart_13455,Enhancers_Heart_13464,Enhan…
												Enhancers_Heart_12372,Enhancers_Heart_16194,Enhancers_Heart_16195,Enhancers_Heart_16196,Enhancers_Heart_16205,Enhancers_Heart_16206,Enhancers_Heart_29220,Enhancers_Heart_29243,Enhancers_Heart_29252,Enhancers_Heart_31894,Enhancers_Heart_34480,Enhancers_Heart_35092,Enhancers_Heart_35093,Enhancers_Heart_38221,Enhancers_Heart_42208,Enhancers_Heart_42211,Enhancers_Heart_42244,Enhancers_Heart_42249,Enh…
												Enhancers_Heart_49134,Enhancers_Heart_49167,Enhancers_Heart_49168,Enhancers_Heart_53650,Enhancers_Heart_76560,Enhancers_Heart_80459
												Enhancers_Heart_10907,Enhancers_Heart_10909,Enhancers_Heart_10910,Enhancers_Heart_10929,Enhancers_Heart_10930,Enhancers_Heart_10931,Enhancers_Heart_12372,Enhancers_Heart_13195,Enhancers_Heart_13202,Enhancers_Heart_13255,Enhancers_Heart_13265,Enhancers_Heart_13666,Enhancers_Heart_13676,Enhancers_Heart_13684,Enhancers_Heart_14213,Enhancers_Heart_14919,Enhancers_Heart_16074,Enhancers_Heart_1615,Enha…
												Enhancers_Heart_10078,Enhancers_Heart_10108,Enhancers_Heart_104,Enhancers_Heart_11906,Enhancers_Heart_11910,Enhancers_Heart_12372,Enhancers_Heart_129,Enhancers_Heart_14466,Enhancers_Heart_14919,Enhancers_Heart_15729,Enhancers_Heart_15730,Enhancers_Heart_16176,Enhancers_Heart_17274,Enhancers_Heart_1877,Enhancers_Heart_1967,Enhancers_Heart_20142,Enhancers_Heart_20144,Enhancers_Heart_20172,Enhancers…
												Enhancers_Heart_10108,Enhancers_Heart_10907,Enhancers_Heart_10909,Enhancers_Heart_10910,Enhancers_Heart_10929,Enhancers_Heart_10930,Enhancers_Heart_10931,Enhancers_Heart_11533,Enhancers_Heart_11534,Enhancers_Heart_11547,Enhancers_Heart_11551,Enhancers_Heart_12078,Enhancers_Heart_13424,Enhancers_Heart_13431,Enhancers_Heart_15046,Enhancers_Heart_15048,Enhancers_Heart_15049,Enhancers_Heart_15055,Enh…
												Enhancers_Heart_10907,Enhancers_Heart_10909,Enhancers_Heart_10910,Enhancers_Heart_10929,Enhancers_Heart_10930,Enhancers_Heart_10931,Enhancers_Heart_11563,Enhancers_Heart_11573,Enhancers_Heart_11609,Enhancers_Heart_11612,Enhancers_Heart_11640,Enhancers_Heart_11641,Enhancers_Heart_11726,Enhancers_Heart_12078,Enhancers_Heart_12127,Enhancers_Heart_12372,Enhancers_Heart_13195,Enhancers_Heart_13202,Enh…
												Enhancers_Heart_10829,Enhancers_Heart_10833,Enhancers_Heart_10864,Enhancers_Heart_10865,Enhancers_Heart_10907,Enhancers_Heart_10909,Enhancers_Heart_10910,Enhancers_Heart_10929,Enhancers_Heart_10930,Enhancers_Heart_10931,Enhancers_Heart_11563,Enhancers_Heart_11573,Enhancers_Heart_11609,Enhancers_Heart_11612,Enhancers_Heart_11906,Enhancers_Heart_11910,Enhancers_Heart_12593,Enhancers_Heart_12615,Enh…
												Enhancers_Heart_10078,Enhancers_Heart_10108,Enhancers_Heart_10907,Enhancers_Heart_10909,Enhancers_Heart_10910,Enhancers_Heart_10929,Enhancers_Heart_10930,Enhancers_Heart_10931,Enhancers_Heart_11001,Enhancers_Heart_15729,Enhancers_Heart_15730,Enhancers_Heart_15851,Enhancers_Heart_23852,Enhancers_Heart_27941,Enhancers_Heart_27942,Enhancers_Heart_27943,Enhancers_Heart_27950,Enhancers_Heart_27951,Enh…
												Enhancers_Heart_10907,Enhancers_Heart_10909,Enhancers_Heart_10910,Enhancers_Heart_10929,Enhancers_Heart_10930,Enhancers_Heart_10931,Enhancers_Heart_11563,Enhancers_Heart_11573,Enhancers_Heart_11609,Enhancers_Heart_11612,Enhancers_Heart_12078,Enhancers_Heart_12127,Enhancers_Heart_12372,Enhancers_Heart_13195,Enhancers_Heart_13202,Enhancers_Heart_13255,Enhancers_Heart_13265,Enhancers_Heart_13424,Enh…
												Enhancers_Heart_10078,Enhancers_Heart_10108,Enhancers_Heart_10949,Enhancers_Heart_13290,Enhancers_Heart_13529,Enhancers_Heart_13532,Enhancers_Heart_13533,Enhancers_Heart_13552,Enhancers_Heart_13557,Enhancers_Heart_15623,Enhancers_Heart_15813,Enhancers_Heart_1607,Enhancers_Heart_16438,Enhancers_Heart_19304,Enhancers_Heart_19305,Enhancers_Heart_19316,Enhancers_Heart_20705,Enhancers_Heart_21327,Enha…
												Enhancers_Heart_10219,Enhancers_Heart_10948,Enhancers_Heart_11533,Enhancers_Heart_11534,Enhancers_Heart_11547,Enhancers_Heart_11551,Enhancers_Heart_13424,Enhancers_Heart_13431,Enhancers_Heart_14365,Enhancers_Heart_15382,Enhancers_Heart_16176,Enhancers_Heart_202,Enhancers_Heart_207,Enhancers_Heart_21915,Enhancers_Heart_22663,Enhancers_Heart_24673,Enhancers_Heart_28695,Enhancers_Heart_28697,Enhance…
												Enhancers_Heart_12372,Enhancers_Heart_1607,Enhancers_Heart_16324,Enhancers_Heart_20705,Enhancers_Heart_24086,Enhancers_Heart_24094,Enhancers_Heart_24095,Enhancers_Heart_26806,Enhancers_Heart_26841,Enhancers_Heart_26856,Enhancers_Heart_26857,Enhancers_Heart_26861,Enhancers_Heart_26886,Enhancers_Heart_26888,Enhancers_Heart_26889,Enhancers_Heart_26893,Enhancers_Heart_26897,Enhancers_Heart_26899,Enha…
												Enhancers_Heart_10572,Enhancers_Heart_10907,Enhancers_Heart_10909,Enhancers_Heart_10910,Enhancers_Heart_10929,Enhancers_Heart_10930,Enhancers_Heart_10931,Enhancers_Heart_12127,Enhancers_Heart_15169,Enhancers_Heart_18073,Enhancers_Heart_20060,Enhancers_Heart_20064,Enhancers_Heart_20085,Enhancers_Heart_20475,Enhancers_Heart_20705,Enhancers_Heart_2149,Enhancers_Heart_2150,Enhancers_Heart_2151,Enhanc…
												Enhancers_Heart_10219,Enhancers_Heart_10948,Enhancers_Heart_11533,Enhancers_Heart_11534,Enhancers_Heart_11547,Enhancers_Heart_11551,Enhancers_Heart_12078,Enhancers_Heart_13424,Enhancers_Heart_13431,Enhancers_Heart_14365,Enhancers_Heart_14990,Enhancers_Heart_15382,Enhancers_Heart_16176,Enhancers_Heart_17329,Enhancers_Heart_202,Enhancers_Heart_207,Enhancers_Heart_21078,Enhancers_Heart_21108,Enhance…
												Enhancers_Heart_1134,Enhancers_Heart_26195,Enhancers_Heart_26212,Enhancers_Heart_26213,Enhancers_Heart_26227,Enhancers_Heart_26239,Enhancers_Heart_26247,Enhancers_Heart_26248,Enhancers_Heart_29220,Enhancers_Heart_29243,Enhancers_Heart_29252,Enhancers_Heart_29533,Enhancers_Heart_33033,Enhancers_Heart_33034,Enhancers_Heart_33053,Enhancers_Heart_33055,Enhancers_Heart_33101,Enhancers_Heart_33102,Enha…
												Enhancers_Heart_10078,Enhancers_Heart_10108,Enhancers_Heart_11533,Enhancers_Heart_11534,Enhancers_Heart_11547,Enhancers_Heart_11551,Enhancers_Heart_12372,Enhancers_Heart_15729,Enhancers_Heart_15730,Enhancers_Heart_15787,Enhancers_Heart_20060,Enhancers_Heart_20064,Enhancers_Heart_20085,Enhancers_Heart_20291,Enhancers_Heart_20305,Enhancers_Heart_21078,Enhancers_Heart_21108,Enhancers_Heart_21114,Enh…
												Enhancers_Heart_10078,Enhancers_Heart_10108,Enhancers_Heart_10174,Enhancers_Heart_12127,Enhancers_Heart_13424,Enhancers_Heart_13431,Enhancers_Heart_13455,Enhancers_Heart_13464,Enhancers_Heart_13666,Enhancers_Heart_15309,Enhancers_Heart_15310,Enhancers_Heart_15851,Enhancers_Heart_1607,Enhancers_Heart_16108,Enhancers_Heart_1615,Enhancers_Heart_16178,Enhancers_Heart_16181,Enhancers_Heart_16236,Enhan…
												Enhancers_Heart_10907,Enhancers_Heart_10909,Enhancers_Heart_10910,Enhancers_Heart_10929,Enhancers_Heart_10930,Enhancers_Heart_10931,Enhancers_Heart_12078,Enhancers_Heart_14311,Enhancers_Heart_14990,Enhancers_Heart_15169,Enhancers_Heart_15590,Enhancers_Heart_15623,Enhancers_Heart_16361,Enhancers_Heart_17672,Enhancers_Heart_18011,Enhancers_Heart_18014,Enhancers_Heart_18015,Enhancers_Heart_18039,Enh…
												Enhancers_Heart_12372,Enhancers_Heart_1607,Enhancers_Heart_16324,Enhancers_Heart_16884,Enhancers_Heart_16885,Enhancers_Heart_17004,Enhancers_Heart_17009,Enhancers_Heart_17274,Enhancers_Heart_20503,Enhancers_Heart_23358,Enhancers_Heart_23375,Enhancers_Heart_23376,Enhancers_Heart_23377,Enhancers_Heart_23378,Enhancers_Heart_24086,Enhancers_Heart_24094,Enhancers_Heart_24095,Enhancers_Heart_26806,Enha…
												Enhancers_Heart_14474,Enhancers_Heart_15565,Enhancers_Heart_15570,Enhancers_Heart_15572,Enhancers_Heart_15623,Enhancers_Heart_16690,Enhancers_Heart_18331,Enhancers_Heart_18332,Enhancers_Heart_21489,Enhancers_Heart_21545,Enhancers_Heart_21547,Enhancers_Heart_2186,Enhancers_Heart_22111,Enhancers_Heart_22115,Enhancers_Heart_22118,Enhancers_Heart_22185,Enhancers_Heart_22200,Enhancers_Heart_22885,Enha…
												Enhancers_Heart_10907,Enhancers_Heart_10909,Enhancers_Heart_10910,Enhancers_Heart_10929,Enhancers_Heart_10930,Enhancers_Heart_10931,Enhancers_Heart_16324,Enhancers_Heart_1877,Enhancers_Heart_20479,Enhancers_Heart_24673,Enhancers_Heart_26195,Enhancers_Heart_26212,Enhancers_Heart_26213,Enhancers_Heart_26227,Enhancers_Heart_26239,Enhancers_Heart_26247,Enhancers_Heart_26248,Enhancers_Heart_29061,Enha…
												Enhancers_Heart_10174,Enhancers_Heart_1078,Enhancers_Heart_10829,Enhancers_Heart_10833,Enhancers_Heart_1087,Enhancers_Heart_11299,Enhancers_Heart_12127,Enhancers_Heart_12333,Enhancers_Heart_12593,Enhancers_Heart_12615,Enhancers_Heart_13455,Enhancers_Heart_13464,Enhancers_Heart_13490,Enhancers_Heart_13495,Enhancers_Heart_13666,Enhancers_Heart_14640,Enhancers_Heart_14641,Enhancers_Heart_14643,Enhan…
												Enhancers_Heart_1615,Enhancers_Heart_1639,Enhancers_Heart_1673,Enhancers_Heart_1677,Enhancers_Heart_1678,Enhancers_Heart_24673,Enhancers_Heart_26195,Enhancers_Heart_26212,Enhancers_Heart_26213,Enhancers_Heart_26227,Enhancers_Heart_26239,Enhancers_Heart_26247,Enhancers_Heart_26248,Enhancers_Heart_69165,Enhancers_Heart_6955,Enhancers_Heart_6991,Enhancers_Heart_6992,Enhancers_Heart_6998,Enhancers_He…
												Enhancers_Heart_10829,Enhancers_Heart_10833,Enhancers_Heart_10907,Enhancers_Heart_10909,Enhancers_Heart_10910,Enhancers_Heart_10929,Enhancers_Heart_10930,Enhancers_Heart_10931,Enhancers_Heart_10948,Enhancers_Heart_11640,Enhancers_Heart_11641,Enhancers_Heart_12078,Enhancers_Heart_12354,Enhancers_Heart_12372,Enhancers_Heart_14474,Enhancers_Heart_15217,Enhancers_Heart_15851,Enhancers_Heart_17084,Enh…
												Enhancers_Heart_104,Enhancers_Heart_10572,Enhancers_Heart_10598,Enhancers_Heart_12593,Enhancers_Heart_12615,Enhancers_Heart_129,Enhancers_Heart_13529,Enhancers_Heart_13532,Enhancers_Heart_13533,Enhancers_Heart_13552,Enhancers_Heart_13557,Enhancers_Heart_13666,Enhancers_Heart_13676,Enhancers_Heart_13684,Enhancers_Heart_14474,Enhancers_Heart_15787,Enhancers_Heart_1615,Enhancers_Heart_16324,Enhancer…
												Enhancers_Heart_15623,Enhancers_Heart_17696,Enhancers_Heart_20405,Enhancers_Heart_31379,Enhancers_Heart_31380,Enhancers_Heart_36563,Enhancers_Heart_3799,Enhancers_Heart_3809,Enhancers_Heart_38221,Enhancers_Heart_39682,Enhancers_Heart_39696,Enhancers_Heart_39698,Enhancers_Heart_41012,Enhancers_Heart_41047,Enhancers_Heart_42152,Enhancers_Heart_42158,Enhancers_Heart_42159,Enhancers_Heart_42160,Enhan…
												Enhancers_Heart_10108,Enhancers_Heart_10929,Enhancers_Heart_10930,Enhancers_Heart_10931,Enhancers_Heart_14294,Enhancers_Heart_14618,Enhancers_Heart_15787,Enhancers_Heart_16658,Enhancers_Heart_17329,Enhancers_Heart_19882,Enhancers_Heart_19889,Enhancers_Heart_20060,Enhancers_Heart_20064,Enhancers_Heart_20085,Enhancers_Heart_25364,Enhancers_Heart_26761,Enhancers_Heart_26763,Enhancers_Heart_26764,Enh…
												Enhancers_Heart_10572,Enhancers_Heart_11001,Enhancers_Heart_13529,Enhancers_Heart_13532,Enhancers_Heart_13533,Enhancers_Heart_14676,Enhancers_Heart_1491,Enhancers_Heart_16324,Enhancers_Heart_16690,Enhancers_Heart_18073,Enhancers_Heart_18308,Enhancers_Heart_18309,Enhancers_Heart_19615,Enhancers_Heart_19616,Enhancers_Heart_202,Enhancers_Heart_21915,Enhancers_Heart_28319,Enhancers_Heart_28320,Enhanc…
												Enhancers_Heart_10907,Enhancers_Heart_10909,Enhancers_Heart_10910,Enhancers_Heart_10929,Enhancers_Heart_10930,Enhancers_Heart_10931,Enhancers_Heart_11001,Enhancers_Heart_11533,Enhancers_Heart_11534,Enhancers_Heart_11547,Enhancers_Heart_11551,Enhancers_Heart_12372,Enhancers_Heart_12586,Enhancers_Heart_12593,Enhancers_Heart_13490,Enhancers_Heart_13495,Enhancers_Heart_13511,Enhancers_Heart_14474,Enh…
												Enhancers_Heart_1607,Enhancers_Heart_1615,Enhancers_Heart_16324,Enhancers_Heart_1639,Enhancers_Heart_16658,Enhancers_Heart_18651,Enhancers_Heart_20705,Enhancers_Heart_21308,Enhancers_Heart_23910,Enhancers_Heart_23933,Enhancers_Heart_26733,Enhancers_Heart_26741,Enhancers_Heart_26750,Enhancers_Heart_26761,Enhancers_Heart_26763,Enhancers_Heart_26764,Enhancers_Heart_26765,Enhancers_Heart_26766,Enhanc…
												Enhancers_Heart_10907,Enhancers_Heart_10909,Enhancers_Heart_10910,Enhancers_Heart_10929,Enhancers_Heart_10930,Enhancers_Heart_10931,Enhancers_Heart_11726,Enhancers_Heart_14919,Enhancers_Heart_16324,Enhancers_Heart_16761,Enhancers_Heart_16764,Enhancers_Heart_18073,Enhancers_Heart_1967,Enhancers_Heart_19978,Enhancers_Heart_19980,Enhancers_Heart_19984,Enhancers_Heart_19985,Enhancers_Heart_19996,Enha…
												Enhancers_Heart_25292,Enhancers_Heart_29220,Enhancers_Heart_29243,Enhancers_Heart_29252,Enhancers_Heart_39509,Enhancers_Heart_41012,Enhancers_Heart_41047,Enhancers_Heart_42152,Enhancers_Heart_42158,Enhancers_Heart_42159,Enhancers_Heart_42160,Enhancers_Heart_42161,Enhancers_Heart_42163,Enhancers_Heart_42190,Enhancers_Heart_53040,Enhancers_Heart_53044,Enhancers_Heart_53067,Enhancers_Heart_53082,Enh…
												Enhancers_Heart_10078,Enhancers_Heart_10108,Enhancers_Heart_10907,Enhancers_Heart_10909,Enhancers_Heart_10910,Enhancers_Heart_10929,Enhancers_Heart_10930,Enhancers_Heart_10931,Enhancers_Heart_11001,Enhancers_Heart_12078,Enhancers_Heart_14365,Enhancers_Heart_15729,Enhancers_Heart_15730,Enhancers_Heart_15851,Enhancers_Heart_17028,Enhancers_Heart_19874,Enhancers_Heart_19882,Enhancers_Heart_19889,Enh…
												Enhancers_Heart_14919,Enhancers_Heart_26195,Enhancers_Heart_26212,Enhancers_Heart_26213,Enhancers_Heart_26227,Enhancers_Heart_26239,Enhancers_Heart_26247,Enhancers_Heart_26248,Enhancers_Heart_34978,Enhancers_Heart_34988,Enhancers_Heart_48757,Enhancers_Heart_48758,Enhancers_Heart_48760,Enhancers_Heart_48769,Enhancers_Heart_48770,Enhancers_Heart_53455,Enhancers_Heart_74330,Enhancers_Heart_74332,Enh…
												Enhancers_Heart_10108,Enhancers_Heart_10572,Enhancers_Heart_10829,Enhancers_Heart_10833,Enhancers_Heart_10907,Enhancers_Heart_10909,Enhancers_Heart_10910,Enhancers_Heart_10929,Enhancers_Heart_10930,Enhancers_Heart_10931,Enhancers_Heart_11640,Enhancers_Heart_11641,Enhancers_Heart_12078,Enhancers_Heart_12127,Enhancers_Heart_14919,Enhancers_Heart_15409,Enhancers_Heart_15623,Enhancers_Heart_16438,Enh…
												Enhancers_Heart_14919,Enhancers_Heart_16324,Enhancers_Heart_2306,Enhancers_Heart_2307,Enhancers_Heart_2309,Enhancers_Heart_2310,Enhancers_Heart_26195,Enhancers_Heart_26212,Enhancers_Heart_26213,Enhancers_Heart_26227,Enhancers_Heart_26239,Enhancers_Heart_26247,Enhancers_Heart_26248,Enhancers_Heart_27772,Enhancers_Heart_27832,Enhancers_Heart_27833,Enhancers_Heart_27834,Enhancers_Heart_27845,Enhance…
												Enhancers_Heart_10572,Enhancers_Heart_12354,Enhancers_Heart_13195,Enhancers_Heart_13202,Enhancers_Heart_15590,Enhancers_Heart_1877,Enhancers_Heart_21078,Enhancers_Heart_21108,Enhancers_Heart_21114,Enhancers_Heart_21123,Enhancers_Heart_21125,Enhancers_Heart_21141,Enhancers_Heart_2149,Enhancers_Heart_2150,Enhancers_Heart_2151,Enhancers_Heart_22663,Enhancers_Heart_25663,Enhancers_Heart_28265,Enhance…
												Enhancers_Heart_13529,Enhancers_Heart_13532,Enhancers_Heart_13533,Enhancers_Heart_13552,Enhancers_Heart_13557,Enhancers_Heart_15623,Enhancers_Heart_15851,Enhancers_Heart_1607,Enhancers_Heart_16324,Enhancers_Heart_16438,Enhancers_Heart_17576,Enhancers_Heart_20705,Enhancers_Heart_22111,Enhancers_Heart_22115,Enhancers_Heart_22118,Enhancers_Heart_22378,Enhancers_Heart_22380,Enhancers_Heart_22381,Enha…
												Enhancers_Heart_13255,Enhancers_Heart_13265,Enhancers_Heart_14919,Enhancers_Heart_19874,Enhancers_Heart_19882,Enhancers_Heart_19889,Enhancers_Heart_20705,Enhancers_Heart_34345,Enhancers_Heart_44840,Enhancers_Heart_44847,Enhancers_Heart_62152,Enhancers_Heart_62155,Enhancers_Heart_62175,Enhancers_Heart_72096,Enhancers_Heart_72122,Enhancers_Heart_72123,Enhancers_Heart_72130,Enhancers_Heart_73752,Enh…
												Enhancers_Heart_16475,Enhancers_Heart_18073,Enhancers_Heart_20863,Enhancers_Heart_27531,Enhancers_Heart_27544,Enhancers_Heart_27551,Enhancers_Heart_27832,Enhancers_Heart_27833,Enhancers_Heart_27834,Enhancers_Heart_27845,Enhancers_Heart_27846,Enhancers_Heart_27869,Enhancers_Heart_27870,Enhancers_Heart_27884,Enhancers_Heart_27886,Enhancers_Heart_27887,Enhancers_Heart_27895,Enhancers_Heart_27899,Enh…
												Enhancers_Heart_10078,Enhancers_Heart_10108,Enhancers_Heart_10208,Enhancers_Heart_10907,Enhancers_Heart_10909,Enhancers_Heart_10910,Enhancers_Heart_10929,Enhancers_Heart_10930,Enhancers_Heart_10931,Enhancers_Heart_11640,Enhancers_Heart_11641,Enhancers_Heart_12078,Enhancers_Heart_13075,Enhancers_Heart_13080,Enhancers_Heart_1581,Enhancers_Heart_17004,Enhancers_Heart_17009,Enhancers_Heart_17154,Enha…
												Enhancers_Heart_10907,Enhancers_Heart_10909,Enhancers_Heart_10910,Enhancers_Heart_10929,Enhancers_Heart_10930,Enhancers_Heart_10931,Enhancers_Heart_17274,Enhancers_Heart_19615,Enhancers_Heart_19616,Enhancers_Heart_19978,Enhancers_Heart_19980,Enhancers_Heart_19984,Enhancers_Heart_19985,Enhancers_Heart_19996,Enhancers_Heart_19997,Enhancers_Heart_20007,Enhancers_Heart_20013,Enhancers_Heart_20015,Enh…
												Enhancers_Heart_11001,Enhancers_Heart_11533,Enhancers_Heart_11534,Enhancers_Heart_11547,Enhancers_Heart_11551,Enhancers_Heart_14990,Enhancers_Heart_15623,Enhancers_Heart_17084,Enhancers_Heart_2407,Enhancers_Heart_2411,Enhancers_Heart_2418,Enhancers_Heart_2423,Enhancers_Heart_29421,Enhancers_Heart_29422,Enhancers_Heart_29423,Enhancers_Heart_29424,Enhancers_Heart_35993,Enhancers_Heart_36001,Enhance…
												Enhancers_Heart_10108,Enhancers_Heart_10829,Enhancers_Heart_10833,Enhancers_Heart_10864,Enhancers_Heart_10865,Enhancers_Heart_10907,Enhancers_Heart_10909,Enhancers_Heart_10910,Enhancers_Heart_10929,Enhancers_Heart_10930,Enhancers_Heart_10931,Enhancers_Heart_10948,Enhancers_Heart_11299,Enhancers_Heart_11640,Enhancers_Heart_11641,Enhancers_Heart_12078,Enhancers_Heart_12093,Enhancers_Heart_12354,Enh…
												Enhancers_Heart_104,Enhancers_Heart_10572,Enhancers_Heart_12372,Enhancers_Heart_129,Enhancers_Heart_14466,Enhancers_Heart_14919,Enhancers_Heart_15933,Enhancers_Heart_16690,Enhancers_Heart_16761,Enhancers_Heart_16764,Enhancers_Heart_16884,Enhancers_Heart_16885,Enhancers_Heart_19615,Enhancers_Heart_19616,Enhancers_Heart_20863,Enhancers_Heart_21408,Enhancers_Heart_22066,Enhancers_Heart_22069,Enhance…
												Enhancers_Heart_17274,Enhancers_Heart_18039,Enhancers_Heart_18045,Enhancers_Heart_18046,Enhancers_Heart_18049,Enhancers_Heart_18057,Enhancers_Heart_18058,Enhancers_Heart_20479,Enhancers_Heart_29948,Enhancers_Heart_29958,Enhancers_Heart_30408,Enhancers_Heart_37004,Enhancers_Heart_37005,Enhancers_Heart_49992,Enhancers_Heart_50000,Enhancers_Heart_50001,Enhancers_Heart_58770,Enhancers_Heart_60874,Enh…
												Enhancers_Heart_13255,Enhancers_Heart_13265,Enhancers_Heart_23765,Enhancers_Heart_28319,Enhancers_Heart_28320,Enhancers_Heart_28323,Enhancers_Heart_28329,Enhancers_Heart_28339,Enhancers_Heart_28340,Enhancers_Heart_28382,Enhancers_Heart_28481,Enhancers_Heart_28486,Enhancers_Heart_28496,Enhancers_Heart_88917,Enhancers_Heart_88920,Enhancers_Heart_88923,Enhancers_Heart_88924,Enhancers_Heart_90492,Enh…
												Enhancers_Heart_15623,Enhancers_Heart_15787,Enhancers_Heart_1967,Enhancers_Heart_19874,Enhancers_Heart_19882,Enhancers_Heart_19889,Enhancers_Heart_20060,Enhancers_Heart_20064,Enhancers_Heart_20085,Enhancers_Heart_20479,Enhancers_Heart_21489,Enhancers_Heart_21545,Enhancers_Heart_21547,Enhancers_Heart_26806,Enhancers_Heart_26841,Enhancers_Heart_26856,Enhancers_Heart_26857,Enhancers_Heart_26861,Enha…
												Enhancers_Heart_10572,Enhancers_Heart_10829,Enhancers_Heart_10833,Enhancers_Heart_10864,Enhancers_Heart_10865,Enhancers_Heart_10907,Enhancers_Heart_10909,Enhancers_Heart_10910,Enhancers_Heart_10929,Enhancers_Heart_10930,Enhancers_Heart_10931,Enhancers_Heart_11563,Enhancers_Heart_11573,Enhancers_Heart_11609,Enhancers_Heart_11612,Enhancers_Heart_11906,Enhancers_Heart_11910,Enhancers_Heart_12372,Enh…
												Enhancers_Heart_35426,Enhancers_Heart_67727,Enhancers_Heart_85251,Enhancers_Heart_89132,Enhancers_Heart_93616,Enhancers_Heart_94981
												Enhancers_Heart_17274,Enhancers_Heart_18039,Enhancers_Heart_18045,Enhancers_Heart_18046,Enhancers_Heart_18049,Enhancers_Heart_18057,Enhancers_Heart_18058,Enhancers_Heart_20479,Enhancers_Heart_29948,Enhancers_Heart_29958,Enhancers_Heart_30408,Enhancers_Heart_37004,Enhancers_Heart_37005,Enhancers_Heart_49992,Enhancers_Heart_50000,Enhancers_Heart_50001,Enhancers_Heart_60874,Enhancers_Heart_60881,Enh…
												Enhancers_Heart_10907,Enhancers_Heart_10909,Enhancers_Heart_10910,Enhancers_Heart_10929,Enhancers_Heart_10930,Enhancers_Heart_10931,Enhancers_Heart_16324,Enhancers_Heart_17274,Enhancers_Heart_19615,Enhancers_Heart_19616,Enhancers_Heart_19874,Enhancers_Heart_19882,Enhancers_Heart_19889,Enhancers_Heart_19978,Enhancers_Heart_19980,Enhancers_Heart_19984,Enhancers_Heart_19985,Enhancers_Heart_19996,Enh…
												Enhancers_Heart_15623,Enhancers_Heart_31379,Enhancers_Heart_31380,Enhancers_Heart_36563,Enhancers_Heart_38221,Enhancers_Heart_39682,Enhancers_Heart_39696,Enhancers_Heart_39698,Enhancers_Heart_42152,Enhancers_Heart_42158,Enhancers_Heart_42159,Enhancers_Heart_42160,Enhancers_Heart_42161,Enhancers_Heart_42163,Enhancers_Heart_42190,Enhancers_Heart_43462,Enhancers_Heart_43471,Enhancers_Heart_43472,Enh…
												Enhancers_Heart_11001,Enhancers_Heart_1171,Enhancers_Heart_1249,Enhancers_Heart_1274,Enhancers_Heart_14311,Enhancers_Heart_14618,Enhancers_Heart_14686,Enhancers_Heart_17084,Enhancers_Heart_18606,Enhancers_Heart_1877,Enhancers_Heart_18979,Enhancers_Heart_19874,Enhancers_Heart_19882,Enhancers_Heart_19889,Enhancers_Heart_20183,Enhancers_Heart_20204,Enhancers_Heart_21442,Enhancers_Heart_21443,Enhance…
												Enhancers_Heart_10208,Enhancers_Heart_10829,Enhancers_Heart_10833,Enhancers_Heart_11299,Enhancers_Heart_12333,Enhancers_Heart_13455,Enhancers_Heart_13464,Enhancers_Heart_13490,Enhancers_Heart_13495,Enhancers_Heart_16074,Enhancers_Heart_16176,Enhancers_Heart_19608,Enhancers_Heart_19615,Enhancers_Heart_19616,Enhancers_Heart_20880,Enhancers_Heart_20881,Enhancers_Heart_20882,Enhancers_Heart_20906,Enh…
												Enhancers_Heart_10078,Enhancers_Heart_10108,Enhancers_Heart_10907,Enhancers_Heart_10909,Enhancers_Heart_10910,Enhancers_Heart_10929,Enhancers_Heart_10930,Enhancers_Heart_10931,Enhancers_Heart_11001,Enhancers_Heart_12372,Enhancers_Heart_12593,Enhancers_Heart_12615,Enhancers_Heart_13195,Enhancers_Heart_13202,Enhancers_Heart_13255,Enhancers_Heart_13265,Enhancers_Heart_13290,Enhancers_Heart_13666,Enh…
												Enhancers_Heart_32692,Enhancers_Heart_32693,Enhancers_Heart_32715,Enhancers_Heart_32722,Enhancers_Heart_33223,Enhancers_Heart_3548,Enhancers_Heart_3549,Enhancers_Heart_3550,Enhancers_Heart_39362,Enhancers_Heart_90091
												Enhancers_Heart_10208,Enhancers_Heart_10907,Enhancers_Heart_10909,Enhancers_Heart_10910,Enhancers_Heart_10929,Enhancers_Heart_10930,Enhancers_Heart_10931,Enhancers_Heart_12354,Enhancers_Heart_13529,Enhancers_Heart_13532,Enhancers_Heart_13533,Enhancers_Heart_13552,Enhancers_Heart_13557,Enhancers_Heart_19404,Enhancers_Heart_19406,Enhancers_Heart_19432,Enhancers_Heart_19434,Enhancers_Heart_19438,Enh…
												Enhancers_Heart_14474,Enhancers_Heart_26195,Enhancers_Heart_26212,Enhancers_Heart_26213,Enhancers_Heart_26227,Enhancers_Heart_26239,Enhancers_Heart_26247,Enhancers_Heart_26248,Enhancers_Heart_32952,Enhancers_Heart_34853,Enhancers_Heart_67044,Enhancers_Heart_67062,Enhancers_Heart_79633,Enhancers_Heart_87335,Enhancers_Heart_87339,Enhancers_Heart_87349
												Enhancers_Heart_10907,Enhancers_Heart_10909,Enhancers_Heart_10910,Enhancers_Heart_10929,Enhancers_Heart_10930,Enhancers_Heart_10931,Enhancers_Heart_11563,Enhancers_Heart_11573,Enhancers_Heart_11609,Enhancers_Heart_11612,Enhancers_Heart_16324,Enhancers_Heart_1877,Enhancers_Heart_20060,Enhancers_Heart_20064,Enhancers_Heart_20085,Enhancers_Heart_20479,Enhancers_Heart_24673,Enhancers_Heart_24840,Enha…
												Enhancers_Heart_10208,Enhancers_Heart_10572,Enhancers_Heart_10829,Enhancers_Heart_10833,Enhancers_Heart_12078,Enhancers_Heart_13195,Enhancers_Heart_13202,Enhancers_Heart_14294,Enhancers_Heart_14311,Enhancers_Heart_16896,Enhancers_Heart_16911,Enhancers_Heart_17154,Enhancers_Heart_19615,Enhancers_Heart_19616,Enhancers_Heart_19978,Enhancers_Heart_19980,Enhancers_Heart_19984,Enhancers_Heart_19985,Enh…
												Enhancers_Heart_73752,Enhancers_Heart_73753,Enhancers_Heart_73754,Enhancers_Heart_73755,Enhancers_Heart_73770,Enhancers_Heart_73774,Enhancers_Heart_75109,Enhancers_Heart_75110,Enhancers_Heart_75114,Enhancers_Heart_75115,Enhancers_Heart_75116,Enhancers_Heart_78084,Enhancers_Heart_78111,Enhancers_Heart_78118,Enhancers_Heart_78152,Enhancers_Heart_78159
												Enhancers_Heart_11001,Enhancers_Heart_2407,Enhancers_Heart_2411,Enhancers_Heart_2418,Enhancers_Heart_2423,Enhancers_Heart_3934,Enhancers_Heart_3935,Enhancers_Heart_49167,Enhancers_Heart_49168,Enhancers_Heart_56735,Enhancers_Heart_68264,Enhancers_Heart_68272,Enhancers_Heart_75367,Enhancers_Heart_83206,Enhancers_Heart_85467,Enhancers_Heart_92205,Enhancers_Heart_92208,Enhancers_Heart_92212,Enhancers…
												Enhancers_Heart_1615,Enhancers_Heart_16324,Enhancers_Heart_1639,Enhancers_Heart_1673,Enhancers_Heart_1677,Enhancers_Heart_1678,Enhancers_Heart_27832,Enhancers_Heart_27833,Enhancers_Heart_27834,Enhancers_Heart_27845,Enhancers_Heart_27846,Enhancers_Heart_27869,Enhancers_Heart_27870,Enhancers_Heart_27884,Enhancers_Heart_27886,Enhancers_Heart_27887,Enhancers_Heart_27895,Enhancers_Heart_27899,Enhancer…
												Enhancers_Heart_10078,Enhancers_Heart_10108,Enhancers_Heart_10949,Enhancers_Heart_13290,Enhancers_Heart_15623,Enhancers_Heart_15813,Enhancers_Heart_19304,Enhancers_Heart_19305,Enhancers_Heart_19316,Enhancers_Heart_20705,Enhancers_Heart_21327,Enhancers_Heart_21332,Enhancers_Heart_21334,Enhancers_Heart_21336,Enhancers_Heart_22920,Enhancers_Heart_25475,Enhancers_Heart_29421,Enhancers_Heart_29422,Enh…
												Enhancers_Heart_10208,Enhancers_Heart_10572,Enhancers_Heart_10907,Enhancers_Heart_10909,Enhancers_Heart_10910,Enhancers_Heart_10929,Enhancers_Heart_10930,Enhancers_Heart_10931,Enhancers_Heart_12127,Enhancers_Heart_12354,Enhancers_Heart_13529,Enhancers_Heart_13532,Enhancers_Heart_13533,Enhancers_Heart_13552,Enhancers_Heart_13557,Enhancers_Heart_14640,Enhancers_Heart_14641,Enhancers_Heart_14643,Enh…
												Enhancers_Heart_10219,Enhancers_Heart_10907,Enhancers_Heart_10909,Enhancers_Heart_10910,Enhancers_Heart_10929,Enhancers_Heart_10930,Enhancers_Heart_10931,Enhancers_Heart_11640,Enhancers_Heart_11641,Enhancers_Heart_11834,Enhancers_Heart_12078,Enhancers_Heart_12127,Enhancers_Heart_12372,Enhancers_Heart_12593,Enhancers_Heart_12615,Enhancers_Heart_13075,Enhancers_Heart_13080,Enhancers_Heart_13255,Enh…
												Enhancers_Heart_10829,Enhancers_Heart_10833,Enhancers_Heart_10864,Enhancers_Heart_10865,Enhancers_Heart_10907,Enhancers_Heart_10909,Enhancers_Heart_10910,Enhancers_Heart_10929,Enhancers_Heart_10930,Enhancers_Heart_10931,Enhancers_Heart_11563,Enhancers_Heart_11573,Enhancers_Heart_11609,Enhancers_Heart_11612,Enhancers_Heart_11906,Enhancers_Heart_11910,Enhancers_Heart_12593,Enhancers_Heart_12615,Enh…
												Enhancers_Heart_10907,Enhancers_Heart_10909,Enhancers_Heart_10910,Enhancers_Heart_10929,Enhancers_Heart_10930,Enhancers_Heart_10931,Enhancers_Heart_11001,Enhancers_Heart_11533,Enhancers_Heart_11534,Enhancers_Heart_11547,Enhancers_Heart_11551,Enhancers_Heart_12372,Enhancers_Heart_12586,Enhancers_Heart_12593,Enhancers_Heart_13490,Enhancers_Heart_13495,Enhancers_Heart_13511,Enhancers_Heart_14439,Enh…
												Enhancers_Heart_14294,Enhancers_Heart_21489,Enhancers_Heart_21545,Enhancers_Heart_21547,Enhancers_Heart_22603,Enhancers_Heart_22604,Enhancers_Heart_22615,Enhancers_Heart_22629,Enhancers_Heart_26195,Enhancers_Heart_26212,Enhancers_Heart_26213,Enhancers_Heart_26227,Enhancers_Heart_26239,Enhancers_Heart_26247,Enhancers_Heart_26248,Enhancers_Heart_2660,Enhancers_Heart_29220,Enhancers_Heart_29243,Enha…
												Enhancers_Heart_10907,Enhancers_Heart_10909,Enhancers_Heart_10910,Enhancers_Heart_10929,Enhancers_Heart_10930,Enhancers_Heart_10931,Enhancers_Heart_12372,Enhancers_Heart_13195,Enhancers_Heart_13202,Enhancers_Heart_13255,Enhancers_Heart_13265,Enhancers_Heart_17154,Enhancers_Heart_17576,Enhancers_Heart_19615,Enhancers_Heart_19616,Enhancers_Heart_20479,Enhancers_Heart_24673,Enhancers_Heart_25475,Enh…
												Enhancers_Heart_10907,Enhancers_Heart_10909,Enhancers_Heart_10910,Enhancers_Heart_10929,Enhancers_Heart_10930,Enhancers_Heart_10931,Enhancers_Heart_16324,Enhancers_Heart_1877,Enhancers_Heart_20479,Enhancers_Heart_24673,Enhancers_Heart_26195,Enhancers_Heart_26212,Enhancers_Heart_26213,Enhancers_Heart_26227,Enhancers_Heart_26239,Enhancers_Heart_26247,Enhancers_Heart_26248,Enhancers_Heart_29061,Enha…
												Enhancers_Heart_12078,Enhancers_Heart_14990,Enhancers_Heart_15169,Enhancers_Heart_15590,Enhancers_Heart_16361,Enhancers_Heart_17672,Enhancers_Heart_18011,Enhancers_Heart_18014,Enhancers_Heart_18015,Enhancers_Heart_18039,Enhancers_Heart_18045,Enhancers_Heart_18046,Enhancers_Heart_18049,Enhancers_Heart_18057,Enhancers_Heart_18058,Enhancers_Heart_19874,Enhancers_Heart_19882,Enhancers_Heart_19889,Enh…
												Enhancers_Heart_10078,Enhancers_Heart_10108,Enhancers_Heart_10208,Enhancers_Heart_10698,Enhancers_Heart_10710,Enhancers_Heart_10729,Enhancers_Heart_10907,Enhancers_Heart_10909,Enhancers_Heart_10910,Enhancers_Heart_10929,Enhancers_Heart_10930,Enhancers_Heart_10931,Enhancers_Heart_11640,Enhancers_Heart_11641,Enhancers_Heart_12078,Enhancers_Heart_12372,Enhancers_Heart_12593,Enhancers_Heart_12615,Enh…
												Enhancers_Heart_104,Enhancers_Heart_129,Enhancers_Heart_16690,Enhancers_Heart_16884,Enhancers_Heart_16885,Enhancers_Heart_22111,Enhancers_Heart_22115,Enhancers_Heart_22118,Enhancers_Heart_25364,Enhancers_Heart_25557,Enhancers_Heart_28695,Enhancers_Heart_28697,Enhancers_Heart_28698,Enhancers_Heart_29061,Enhancers_Heart_29065,Enhancers_Heart_29084,Enhancers_Heart_29220,Enhancers_Heart_29243,Enhance…
												Enhancers_Heart_12372,Enhancers_Heart_1607,Enhancers_Heart_16324,Enhancers_Heart_16884,Enhancers_Heart_16885,Enhancers_Heart_17004,Enhancers_Heart_17009,Enhancers_Heart_17274,Enhancers_Heart_18331,Enhancers_Heart_18332,Enhancers_Heart_20085,Enhancers_Heart_20503,Enhancers_Heart_23358,Enhancers_Heart_23375,Enhancers_Heart_23376,Enhancers_Heart_23377,Enhancers_Heart_23378,Enhancers_Heart_23391,Enha…
												Enhancers_Heart_24673,Enhancers_Heart_26195,Enhancers_Heart_26212,Enhancers_Heart_26213,Enhancers_Heart_26227,Enhancers_Heart_26239,Enhancers_Heart_26247,Enhancers_Heart_26248,Enhancers_Heart_69165,Enhancers_Heart_6955,Enhancers_Heart_6991,Enhancers_Heart_6992,Enhancers_Heart_6998,Enhancers_Heart_7011,Enhancers_Heart_7027,Enhancers_Heart_7028,Enhancers_Heart_7032,Enhancers_Heart_7054,Enhancers_He…
												Enhancers_Heart_12354,Enhancers_Heart_12372,Enhancers_Heart_16194,Enhancers_Heart_16195,Enhancers_Heart_16196,Enhancers_Heart_16205,Enhancers_Heart_16206,Enhancers_Heart_18308,Enhancers_Heart_18309,Enhancers_Heart_20060,Enhancers_Heart_20064,Enhancers_Heart_20085,Enhancers_Heart_21078,Enhancers_Heart_21108,Enhancers_Heart_21114,Enhancers_Heart_21123,Enhancers_Heart_21125,Enhancers_Heart_21141,Enh…
												Enhancers_Heart_10078,Enhancers_Heart_104,Enhancers_Heart_10907,Enhancers_Heart_10909,Enhancers_Heart_10910,Enhancers_Heart_10929,Enhancers_Heart_10930,Enhancers_Heart_10931,Enhancers_Heart_11001,Enhancers_Heart_11906,Enhancers_Heart_11910,Enhancers_Heart_12372,Enhancers_Heart_129,Enhancers_Heart_13255,Enhancers_Heart_13265,Enhancers_Heart_13650,Enhancers_Heart_14213,Enhancers_Heart_14640,Enhance…
												Enhancers_Heart_10108,Enhancers_Heart_10572,Enhancers_Heart_10829,Enhancers_Heart_10833,Enhancers_Heart_10907,Enhancers_Heart_10909,Enhancers_Heart_10910,Enhancers_Heart_10929,Enhancers_Heart_10930,Enhancers_Heart_10931,Enhancers_Heart_11640,Enhancers_Heart_11641,Enhancers_Heart_12078,Enhancers_Heart_12127,Enhancers_Heart_14919,Enhancers_Heart_15409,Enhancers_Heart_15623,Enhancers_Heart_16438,Enh…
												Enhancers_Heart_11640,Enhancers_Heart_11641,Enhancers_Heart_14311,Enhancers_Heart_19615,Enhancers_Heart_19616,Enhancers_Heart_21078,Enhancers_Heart_21108,Enhancers_Heart_21114,Enhancers_Heart_21123,Enhancers_Heart_21125,Enhancers_Heart_21141,Enhancers_Heart_26195,Enhancers_Heart_26212,Enhancers_Heart_26213,Enhancers_Heart_26227,Enhancers_Heart_26239,Enhancers_Heart_26247,Enhancers_Heart_26248,Enh…

## Sheet: Heart enhancers down guinea pig
Supplemental Table S8. Gene ontology enrichments (TOP 100) for enhancers with an activity shift in the guinea pig branch. Columns as in Table S4.
GO	Name	Binom Enrichment	# foreground regions	# expected regions	Binom BH p-value	Hyper Enrichment	# foreground genes	# expected genes	Hyper BH p-value	Genes	Regions
GO:0061614	miRNA transcription	3.26687	57	17.4479	7.89e-11	3.40506	24	7.04834	4.27e-06	App,Bmpr1a,Ets1,Fosl1,Gata6,Hif1a,Jun,Klf4,Mrtfb,Myc,Nfatc3,Nfib,Nr3c1,Pdgfb,Ppard,Smad1,Smad3,Smad6,Srebf1,Srf,Tead1,Tert,Tgfb1,Tgfb2
GO:0036294	cellular response to decreased oxygen levels	3.26423	54	16.5429	1.47e-10	2.25153	25	11.1036	0.00211	Ajuba,Aqp1,Bcl2,Cd34,Cpeb4,Ddah1,Egln3,Epas1,Epha4,Fndc1,Gata6,Hif1a,Kcnd2,Myc,Oprd1,Ppard,Prkce,Pten,Rgcc,Rora,Slc9a1,Tert,Vegfa,Vldlr,Zfp36l1
GO:0071453	cellular response to oxygen levels	3.12071	57	18.2651	1.47e-10	2.13466	27	12.6484	0.00255	Ajuba,Aqp1,Atg7,Bcl2,Cd34,Cpeb4,Ddah1,Egln3,Epas1,Epha4,Fndc1,Gata6,Hif1a,Kcnd2,Myc,Myod1,Oprd1,Ppard,Prkce,Pten,Rgcc,Rora,Slc9a1,Tert,Vegfa,Vldlr,Zfp36l1
GO:0071456	cellular response to hypoxia	3.28423	53	16.1377	1.47e-10	2.58926	24	9.26905	0.000359	Ajuba,Aqp1,Bcl2,Cd34,Ddah1,Egln3,Epas1,Epha4,Fndc1,Gata6,Hif1a,Kcnd2,Myc,Oprd1,Ppard,Prkce,Pten,Rgcc,Rora,Slc9a1,Tert,Vegfa,Vldlr,Zfp36l1
GO:0051336	regulation of hydrolase activity	1.61748	233	144.051	1.83e-10	1.64026	140	85.3525	3.49e-07	Acer2,Adcyap1r1,Adora2a,Adra1a,Adrb1,Afdn,Agtr1b,Ajuba,Anxa1,Aph1b,App,Aqp1,Arap2,Arap3,Arhgap29,Asap1,Asph,Bcap31,Bcar3,Bcl10,Bcl2l11,Bcr,Bid,Bin1,Bod1,Bok,Calm1,Calm2,Camk2a,Cck,Ccl2,Ccn1,Ccn2,Cd109,Cd40,Cldn4,Cradd,Cry2,Dab2ip,Dapk1,Ddx3x,Dennd1b,Dgki,Dock9,Drd2,Efna5,Eif5,Epha4,Ephb3,Fgfr1,Flt1,Gapvd1,Gna12,Gnao1,Gpc3,Gpi1,Gpr65,Gpsm1,Gramd4,Hdac9,Iqsec1,Itga6,Itih4,Itih5,Klf4,Lepr,Lmf1,Lpar1…
GO:0001666	response to hypoxia	2.39146	87	36.3794	1.83e-10	2.15146	43	19.9864	5.37e-05	Ajuba,Aqp1,Atp1b1,Bcl2,Cd34,Chrnb2,Ddah1,Drd2,Edn1,Ednra,Egln3,Epas1,Epha4,Flt1,Fndc1,Fosl2,Gata6,Hif1a,Itpr1,Kcnd2,Kcnma1,Kdr,Mb,Myc,Nfatc3,Oprd1,Pak1,Plat,Ppard,Prkce,Pten,Rgcc,Rora,Slc9a1,Smad3,Sod3,Tek,Tert,Tgfb2,Tgfb3,Vegfa,Vldlr,Zfp36l1
GO:0051345	positive regulation of hydrolase activity	1.82344	163	89.3916	1.83e-10	1.90357	93	48.8556	1.97e-07	Acer2,Adcyap1r1,Adra1a,Adrb1,Afdn,Agtr1b,Aph1b,App,Arap2,Arap3,Arhgap29,Asap1,Asph,Bcap31,Bcar3,Bcl10,Bcl2l11,Bcr,Bid,Bin1,Bok,Calm1,Calm2,Cck,Ccl2,Ccn1,Ccn2,Cd40,Cldn4,Cradd,Dapk1,Ddx3x,Dennd1b,Dock9,Eif5,Epha4,Fgfr1,Flt1,Gna12,Gnao1,Gpr65,Gramd4,Iqsec1,Itga6,Lmf1,Lpar1,Map3k5,Map4k4,Mef2c,Mtss2,Myc,Ngf,Ntf3,Pdgfra,Pkp4,Pla2g5,Plin5,Ppargc1b,Ppp1r12a,Ppp1r15b,Prex1,Prkd1,Prkd2,Ptk2b,Ralgapa2,Ral…
GO:0036293	response to decreased oxygen levels	2.36905	88	37.1457	1.83e-10	1.99873	44	22.014	0.000238	Ajuba,Aqp1,Atp1b1,Bcl2,Cd34,Chrnb2,Cpeb4,Ddah1,Drd2,Edn1,Ednra,Egln3,Epas1,Epha4,Flt1,Fndc1,Fosl2,Gata6,Hif1a,Itpr1,Kcnd2,Kcnma1,Kdr,Mb,Myc,Nfatc3,Oprd1,Pak1,Plat,Ppard,Prkce,Pten,Rgcc,Rora,Slc9a1,Smad3,Sod3,Tek,Tert,Tgfb2,Tgfb3,Vegfa,Vldlr,Zfp36l1
GO:0005996	monosaccharide metabolic process	2.37267	87	36.6675	1.97e-10	1.59041	41	25.7796	0.0223	Akr1b3,Apod,B4galt1,Chst1,Chst15,Esrrb,Fabp5,Fggy,Gdpgp1,Gpd1,Gpi1,Hif1a,Hk2,Inpp5k,Insr,Kat2b,Kcnj11,Kcnq1,Lepr,Mpi,Myc,Ncoa2,Nisch,Nnmt,Nr3c1,Otog,Otogl,Pfkfb2,Pfkp,Pgm5,Pik3ca,Pik3r1,Ppargc1a,Ppp1cb,Ppp1r3a,Ppp1r3b,Rbks,Rora,Rubcnl,Slc35b4,Sorbs1
GO:0030029	actin filament-based process	1.68859	202	119.626	1.97e-10	1.9735	129	65.3661	3.81e-11	Ablim3,Actc1,Actn1,Actr3,Adrb1,Akap13,Amotl2,Anxa1,Aqp1,Arhgap26,Arhgap28,Arhgef10l,Atp1a1,Bcr,Bin1,Bst1,Capzb,Ccdc88c,Ccn2,Cdc42bpa,Cdc42ep1,Cdc42ep3,Clasp1,Cldn19,Cnn3,Coro2b,Ctnna3,Cul3,Cyria,Cyria,Daam1,Dbn1,Diaph1,Diaph3,Dsg2,Dtnbp1,Edn1,Efna5,Ehbp1l1,Elmo1,Enah,Epb41,Epb41l2,Fhdc1,Fhod3,Fmnl3,Gpr65,Inpp5k,Iqsec1,Itgb3,Ldb3,Llgl2,Lmod3,Lpar1,Lpin1,Lrp1,Map3k1,Mef2a,Mef2c,Mkln1,Mrtfb,Myl2,Myl…
GO:0051781	positive regulation of cell division	3.55778	46	12.9294	1.97e-10	2.33033	18	7.72421	0.00845	Cdc14a,Cul3,Drd2,Fgf1,Fgf6,Garem1,Igf1r,Lbh,Pdgfa,Pdgfb,Pkp4,Prkce,Prok1,Tal1,Tgfb1,Tgfb2,Tgfb3,Vegfa
GO:0030036	actin cytoskeleton organization	1.73087	182	105.149	3.79e-10	1.99963	117	58.5109	1.81e-10	Ablim3,Actc1,Actn1,Actr3,Akap13,Amotl2,Anxa1,Aqp1,Arhgap26,Arhgap28,Arhgef10l,Bcr,Bin1,Bst1,Capzb,Ccn2,Cdc42bpa,Cdc42ep1,Cdc42ep3,Clasp1,Cldn19,Cnn3,Coro2b,Cul3,Cyria,Cyria,Daam1,Dbn1,Diaph1,Diaph3,Dtnbp1,Edn1,Efna5,Ehbp1l1,Elmo1,Enah,Epb41,Epb41l2,Fhdc1,Fhod3,Fmnl3,Gpr65,Inpp5k,Iqsec1,Itgb3,Ldb3,Llgl2,Lmod3,Lpar1,Lpin1,Lrp1,Map3k1,Mef2a,Mef2c,Mkln1,Mrtfb,Myl2,Myl9,Myo1c,Mypn,Nisch,Nos1ap,Notch2,…
GO:0070482	response to oxygen levels	2.27372	91	40.0226	4.97e-10	1.73877	46	26.4554	0.00297	Ajuba,Aqp1,Atg7,Atp1b1,Bcl2,Cd34,Chrnb2,Cpeb4,Ddah1,Drd2,Edn1,Ednra,Egln3,Epas1,Epha4,Flt1,Fndc1,Fosl2,Gata6,Hif1a,Itpr1,Kcnd2,Kcnma1,Kdr,Mb,Myc,Myod1,Nfatc3,Oprd1,Pak1,Plat,Ppard,Prkce,Pten,Rgcc,Rora,Slc9a1,Smad3,Sod3,Tek,Tert,Tgfb2,Tgfb3,Vegfa,Vldlr,Zfp36l1
GO:0001525	angiogenesis	1.70686	168	98.4265	6.32e-09	2.03289	95	46.7315	9.54e-09	Abcc8,Ackr3,Adgrg1,Agtr1b,Aimp1,Akt3,Amotl2,Angpt1,Aqp1,B4galt1,Btg1,Calcrl,Ccbe1,Ccl2,Ccn1,Ccn2,Cd34,Cd40,Cemip2,Crhr2,Cyp1b1,Dab2ip,Dcn,Ddah1,Ednra,Efnb2,Epas1,Ephb3,Esm1,Ets1,Fbln5,Fgf1,Fgf6,Fgfr1,Flt1,Fmnl3,Fzd5,Gata6,Hif1a,Hk2,Hmga2,Itgb3,Jcad,Jun,Kdr,Klf4,Lepr,Map3k7,Meox2,Ninj1,Nos3,Nrp2,Parva,Pdcl3,Pdgfa,Pdgfra,Pecam1,Pik3ca,Pik3cg,Prcp,Prkd1,Prkd2,Prok1,Pten,Ptk2b,Rapgef3,Rgcc,Rnh1,Rora,…
GO:0007005	mitochondrion organization	1.94004	109	56.1845	3.6e-08	1.52852	58	37.9452	0.0106	Akt3,Atg14,Atg4b,Atg7,Atg9b,Bcl2,Bcl2l11,Bcs1l,Bid,Bok,Calm1,Camk2a,Ccar2,Cck,Cebpa,Dcn,Dctn6,Edn1,Ednra,Epas1,Erbb4,Fbxw7,Fez1,Fxn,Golph3,Hif1a,Higd2a,Hk2,Jun,Kdr,Lig3,Lpin1,Map3k1,Mapt,Mef2a,Miga1,Mtfr2,Mtx2,Myc,Pam16l,Pla2g6,Ppargc1a,Ppif,Ptcd2,Pyroxd2,Samm50,Septin4,Sfn,Slc25a36,Slc9a1,Srebf1,Synj2,Tert,Tmem11,Tmem135,Vps13a,Vps13c,Vps13d
GO:1902895	positive regulation of miRNA transcription	3.05917	43	14.0561	7.39e-08	3.39282	19	5.60005	5.71e-05	Bmpr1a,Ets1,Fosl1,Hif1a,Jun,Klf4,Mrtfb,Myc,Nr3c1,Pdgfb,Smad1,Smad3,Smad6,Srebf1,Srf,Tead1,Tert,Tgfb1,Tgfb2
GO:0003013	circulatory system process	1.70715	149	87.2801	8.92e-08	2.10336	79	37.559	6.38e-08	Abcc8,Actc1,Adora2a,Adra1a,Adrb1,Agtr1b,Akap12,Angpt1,Apoe,App,Atp1a1,Atp1b1,Bcr,Bin1,Calm1,Calm2,Ccn2,Chd7,Crhr2,Ctnna3,Ddah1,Drd2,Dsg2,Edn1,Ednra,Ehd3,Epas1,Ext1,Fabp5,Fli1,Gata6,Gnao1,Gpd1l,Hif1a,Hrh2,Kcnd3,Kcnma1,Kcnq1,Kdr,Lrp1,Mef2a,Myl2,Nos1ap,Nos3,Nr3c1,P2ry1,Pde4b,Pdgfb,Pebp1,Pik3r1,Pla2g6,Popdc2,Ppard,Rbfox2,Rgs4,Rnls,Rps6ka2,Sema3a,Sgcd,Slc1a5,Slc4a3,Slc9a1,Smad6,Smad7,Smtnl2,Sod3,Srebf…
GO:0007296	vitellogenesis	9.32802	14	1.50086	1.56e-07	7.76778	3	0.386211	0.0334	Etv6,Fosl1,Zmiz1
GO:0070528	protein kinase C signaling	4.55612	25	5.48712	1.71e-07	2.84819	11	3.86211	0.0151	Adgrg1,Adra1a,Akap12,Capzb,Cd40,Gpd1l,Pdgfb,Phlpp1,Pla2g6,Prkch,Vegfa
GO:0044262	cellular carbohydrate metabolic process	2.0154	90	44.656	1.79e-07	1.49483	42	28.0968	0.047	Adcyap1r1,Adrb1,Akr1b3,Aoah,B3gnt2,B4galt1,Csgalnact1,Esrrb,Ext1,Fggy,Gbe1,Hif1a,Hk2,Idh2,Il6st,Inpp5k,Insr,Ippk,Kat2b,Lepr,Mtmr2,Mtmr7,Ncoa2,Nnmt,Nr3c1,P2ry1,Pfkfb2,Phka2,Ppargc1a,Ppp1cb,Ppp1r2,Ppp1r3a,Ppp1r3b,Prkag2,Prkce,Pten,Ptk2b,Rora,Rubcnl,Slc35b4,Sorbs1,Synj2
GO:0045936	negative regulation of phosphate metabolic process	1.73405	127	73.2391	6.41e-07	1.69788	70	41.228	0.00026	Adora2a,Ajuba,Angpt1,Apoe,Atg14,Bod1,Cactin,Camk2n1,Cd109,Cdkn1a,Cdkn2b,Cnksr3,Cry2,Ctdsp2,Ctdspl,Dab2ip,Drd2,Dtnbp1,Dusp10,Dusp6,Entpd1,Errfi1,Fabp4,Gadd45g,Gpd1l,Inpp5k,Insr,Jun,Kat2b,Lpin1,Lrp1,Macroh2a1,Mapt,Mfhas1,Mgat5,Ntf3,Pard3,Pbk,Pdgfa,Pdgfb,Pebp1,Pecam1,Pip4k2a,Pkig,Plpp3,Ppargc1a,Ppp1r15b,Ppp2r5a,Prkag2,Prkar1b,Pten,Ptpn1,Sfrp1,Sh3bp5l,Shb,Sirpb1c,Smad6,Smad7,Socs5,Sorl1,Spry1,Spry2,S…
GO:0045765	regulation of angiogenesis	1.81777	106	58.3133	1.21e-06	1.8831	54	28.6761	0.000157	Abcc8,Agtr1b,Akt3,Aqp1,Btg1,Ccbe1,Ccl2,Cd34,Cd40,Crhr2,Cyp1b1,Dab2ip,Dcn,Ddah1,Ets1,Fbln5,Fgf1,Flt1,Gata6,Hif1a,Hk2,Hmga2,Itgb3,Jcad,Kdr,Klf4,Ninj1,Nos3,Pdcl3,Prkd1,Prkd2,Prok1,Ptk2b,Rapgef3,Rgcc,Rnh1,Sash1,Sema3e,Sema6a,Smad1,Sparc,Spry2,Stab1,Tafa5,Tbxa2r,Tek,Tert,Tgfb2,Tgfbr2,Tjp1,Tlr3,Tspan12,Vash1,Vegfa
GO:0033674	positive regulation of kinase activity	1.66556	136	81.6544	1.6e-06	1.94498	80	41.1314	7.4e-07	Adra1a,Agtr1b,Ajuba,Akap13,Alk,Angpt1,App,Atg14,Camkk1,Card10,Cartpt,Ccn1,Ccnd1,Cd40,Cdkn1a,Cemip,Cops8,Dab2ip,Dag1,Ddx3x,Dlg3,Drd2,Edn1,Epha4,Ephb3,Erbb4,Etaa1,Fbxw7,Fgf1,Fgfr1,Flt1,Fzd4,Fzd5,Ghr,Hmga2,Igf1r,Insr,Itgb3,Kdr,Kitl,Map2k3,Map3k1,Map3k12,Map3k5,Map3k7,Mmd,Mnat1,Musk,Neurl1a,Ntf3,Pak1,Parp16,Pdgfa,Pdgfb,Pdgfra,Pfkfb2,Pik3cg,Pik3r5,Prkag2,Ptk2b,Ptpn1,Ralb,Rap1a,Rgcc,Ror1,Ryk,Sash1,Snx9…
GO:0031032	actomyosin structure organization	2.07269	73	35.2199	1.96e-06	2.40163	48	19.9864	1.06e-06	Actc1,Akap13,Arhgap28,Arhgef10l,Ccn2,Cdc42bpa,Clasp1,Cnn3,Coro2b,Cul3,Edn1,Epb41,Epb41l2,Fhdc1,Fhod3,Gpr65,Inpp5k,Ldb3,Lmod3,Lpar1,Mef2a,Mef2c,Myl2,Myl9,Mypn,Pak1,Pdgfra,Pdlim1,Pdlim4,Pgm5,Phactr1,Pik3r1,Prkcq,Ptk2b,Rapgef3,Rgcc,S100a10,S1pr1,Smad3,Sorbs1,Srf,Tgfb3,Tjp1,Tmeff2,Tmod1,Tpm1,Ttn,Wasf2
GO:0030097	hemopoiesis	1.6224	143	88.141	2.54e-06	1.5885	75	47.2142	0.00104	Ahctf1,Angpt1,Anxa1,Arid1b,Atg7,Bcl2,Bcr,Card11,Cartpt,Cd34,Cd40lg,Cd83,Cebpa,Cebpb,Creb1,Dusp10,Epas1,Ets1,Fbxw7,Foxp1,Gabpa,Gpr68,Hif1a,Hlx,Inpp5d,Itgb3,Jun,Kat6a,Kat7,Kdr,Kitl,Klf13,Klf4,Kmt2a,Mef2c,Mitf,Myc,Nfkbiz,Ninj1,Notch2,Pbx1,Pik3r1,Ppargc1b,Ptk2b,Rab7b,Rbfox2,Rbp1,Rtkn2,Sfrp1,Shb,Smad7,Smarca2,Socs5,Sox13,Sox6,Sp3,Sptb,Tal1,Tek,Tesc,Tgfb1,Tgfb2,Tgfbr2,Thpo,Tmem178,Tnrc6c,Trib1,Ubash3b,…
GO:0051272	positive regulation of cellular component movement	1.52008	178	117.099	3.55e-06	1.84163	109	59.1868	7.5e-08	Ackr3,Actr3,Acvr1,Adora3,Akap12,Akt3,Angpt1,Anxa1,App,Aqp1,Bcl2,Ccbe1,Ccl2,Ccn1,Cd274,Cd40,Cemip,Cfap20,Clasp1,Cldn4,Cyp1b1,Dab2ip,Dapk2,Diaph1,Edn1,Ednra,Elp3,Epcam,Epha4,Erbb4,Ets1,Fez1,Fgf1,Fgfbp1,Fgfr1,Flt1,Foxp1,Fzd4,Gpi1,Hdac7,Hdac9,Hif1a,Igf1r,Igfbp5,Il6st,Insr,Iqsec1,Itga6,Itgb3,Jcad,Jun,Kdr,Kitl,Lamb1,Lpar1,Lrp1,Map2k3,Map4k4,Mgat5,Myc,Myo1c,Nos3,Nr4a3,Ntf3,Pak1,Pdgfa,Pdgfb,Pdgfra,Pecam1…
GO:0001933	negative regulation of protein phosphorylation	1.75988	106	60.2315	3.83e-06	1.77368	56	31.5727	0.000519	Adora2a,Angpt1,Apoe,Atg14,Cactin,Camk2n1,Cd109,Cdkn1a,Cnksr3,Ctdsp2,Ctdspl,Dab2ip,Drd2,Dtnbp1,Dusp10,Dusp6,Errfi1,Fabp4,Gadd45g,Gpd1l,Inpp5k,Insr,Jun,Kat2b,Lrp1,Macroh2a1,Ntf3,Pard3,Pbk,Pebp1,Pecam1,Pkig,Plpp3,Ppargc1a,Ppp1r15b,Prkag2,Prkar1b,Pten,Ptpn1,Sfrp1,Sh3bp5l,Shb,Sirpb1c,Smad6,Smad7,Socs5,Sorl1,Spry1,Spry2,Spry4,Stk39,Tfap4,Tgfb1,Trib1,Ubash3b,Xdh
GO:0001944	vasculature development	1.71643	115	66.9994	3.93e-06	1.86366	61	32.7313	6.18e-05	Abcc8,Agtr1b,Akt3,Angpt1,Aqp1,Btg1,Ccbe1,Ccl2,Cd34,Cd40,Crhr2,Cyp1b1,Dab2ip,Dcn,Ddah1,Errfi1,Ets1,Fbln5,Fgf1,Flt1,Fzd5,Gata6,Hif1a,Hk2,Hmga2,Itgb3,Jcad,Kdr,Klf4,Ninj1,Nos3,Pdcl3,Pdgfb,Pdgfra,Prkd1,Prkd2,Prok1,Ptk2b,Rapgef3,Rgcc,Rnh1,Sash1,Sema3e,Sema6a,Smad1,Sparc,Spry2,Stab1,Tafa5,Tbxa2r,Tcf21,Tek,Tert,Tgfb2,Tgfbr2,Tjp1,Tlr3,Tspan12,Vash1,Vegfa,Zfand5
GO:0043280	positive regulation of cysteine-type endopeptidase activity involved in apoptotic process	2.55102	44	17.248	3.93e-06	1.90788	21	11.007	0.0294	Acer2,App,Bcap31,Bcl10,Bcl2l11,Bid,Bok,Cck,Ccn1,Ccn2,Cradd,Dapk1,Ddx3x,Gramd4,Map3k5,Myc,Ngf,Smad3,Sox7,Tfap4,Xdh
GO:0008285	negative regulation of cell population proliferation	1.46462	206	140.651	3.94e-06	1.71397	117	68.2627	6.03e-07	Abcc8,Ackr3,Adgrg1,Adora2a,Adora3,Aimp1,Apod,Apoe,App,Aqp11,Asph,B4galt1,Bcl2,Btg1,Btg3,Cask,Ccl2,Cd109,Cd274,Cdkn1a,Cdkn2b,Cebpa,Cebpb,Cldn19,Cops8,Cyp1b1,Dab2ip,Ddah1,Ddx20,Drd2,Dusp10,E2f1,Efnb2,Erbb4,Flt1,Fntb,Fosl1,Fzd5,Gata6,Gna12,Gpc3,Idh2,Igfbp5,Inpp5d,Intu,Irf6,Jun,Kat2b,Klf13,Klf4,Klf9,Kmt2a,Mad1l1,Mcc,Mef2c,Mn1,Mtbp,Myc,Myod1,Neurl1a,Nfatc1,Nfib,Nos3,Pak1,Pik3r1,Pla2g2d,Ppard,Ppargc1a,…
GO:0048534	hematopoietic or lymphoid organ development	1.56893	157	100.068	4.1e-06	1.54611	83	53.6833	0.00106	Ahctf1,Angpt1,Anxa1,Arid1b,Atg7,Bcl2,Bcl2l11,Bcr,Card11,Cartpt,Cd34,Cd40lg,Cd83,Cdkn2b,Cebpa,Cebpb,Creb1,Dusp10,Epas1,Ephb3,Ets1,Fbxw7,Foxp1,Gabpa,Gpr68,Hif1a,Hlx,Inpp5d,Itgb3,Jun,Kat6a,Kat7,Kdr,Kitl,Klf13,Klf4,Kmt2a,Mad1l1,Mef2c,Mitf,Myc,Nfatc3,Nfkbiz,Ninj1,Notch2,Pbx1,Pik3r1,Ppargc1b,Ptk2b,Rab7b,Rbfox2,Rbp1,Rtkn2,Sfrp1,Shb,Six1,Smad7,Smarca2,Socs5,Sox13,Sox6,Sp3,Sptb,Srf,Tal1,Tcf21,Tek,Tesc,Tgf…
GO:0030239	myofibril assembly	4.75454	19	3.99618	4.38e-06	3.56023	11	3.08968	0.00274	Actc1,Fhod3,Lmod3,Mef2a,Myl2,Myl9,Pdgfra,Pgm5,Srf,Tmod1,Ttn
GO:2000147	positive regulation of cell motility	1.51845	176	115.908	4.43e-06	1.86117	108	58.0281	6.38e-08	Ackr3,Actr3,Acvr1,Adora3,Akap12,Akt3,Angpt1,Anxa1,App,Aqp1,Bcl2,Ccbe1,Ccl2,Ccn1,Cd274,Cd40,Cemip,Cfap20,Clasp1,Cldn4,Cyp1b1,Dab2ip,Dapk2,Diaph1,Edn1,Ednra,Elp3,Epcam,Epha4,Erbb4,Ets1,Fgf1,Fgfbp1,Fgfr1,Flt1,Foxp1,Fzd4,Gpi1,Hdac7,Hdac9,Hif1a,Igf1r,Igfbp5,Il6st,Insr,Iqsec1,Itga6,Itgb3,Jcad,Jun,Kdr,Kitl,Lamb1,Lpar1,Lrp1,Map2k3,Map4k4,Mgat5,Myc,Myo1c,Nos3,Nr4a3,Ntf3,Pak1,Pdgfa,Pdgfb,Pdgfra,Pecam1,Pik3…
GO:0007015	actin filament organization	1.70566	116	68.0087	4.47e-06	1.73825	72	41.4211	9.63e-05	Actc1,Actn1,Actr3,Arhgap28,Arhgef10l,Bcl2,Bin1,Capzb,Ccn2,Cdc42ep1,Cdc42ep3,Clasp1,Coro2b,Crhr2,Ctnna3,Cul3,Cyria,Cyria,Dbn1,Diaph1,Diaph3,Elmo1,Enah,Fhdc1,Fhod3,Gpr65,Hmcn1,Inpp5k,Lmod3,Lpar1,Map3k1,Mical3,Myo1c,Nrap,Pak1,Pakap,Pakap,Pdlim1,Pdlim4,Pecam1,Phactr1,Pik3ca,Pik3r1,Ppargc1b,Prkce,Prkci,Prkcq,Ptk2b,Rapgef3,Rflnb,Rgcc,Rgs4,S100a10,S1pr1,Shroom4,Sirpb1c,Smad3,Snx9,Sorbs1,Sorbs2,Specc1l,S…
GO:0007265	Ras protein signal transduction	1.78033	102	57.2926	4.47e-06	1.7629	56	31.7658	0.000614	Abca1,Abra,Adgrg1,Adra1a,Adrb1,Agtr1b,Akap13,Apoe,Arap3,Arhgap32,Arhgef28,Bcr,Cdc42ep1,Cdc42ep3,Cdh2,Cul3,Cyth1,Cyth4,Dab2ip,Dennd3,Dennd4a,Dgki,Ednra,Elmo1,Garre1,Gna12,Gpr17,Gpr65,Iqsec1,Jun,Kitl,Lpar1,Map4k4,Mapkap1,Ngf,Nisch,Notch2,Pecam1,Pik3cg,Prag1,Prkd1,Rab4a,Ralb,Ralgapa2,Ralgps1,Rap1a,Rapgef3,Rasa2,Rhou,Rras2,Spry1,Spry2,Spry4,Tgfb2,Tiam1,Wasf2
GO:0097435	supramolecular fiber organization	1.5284	169	110.573	4.95e-06	1.50367	107	71.1593	0.000352	Actc1,Actn1,Actr3,Akap13,Apoe,App,Arhgap28,Arhgef10l,Bcl2,Bfsp2,Bid,Bin1,Capzb,Ccdc88b,Ccdc88c,Ccn2,Cdc42ep1,Cdc42ep3,Clasp1,Clip4,Coro2b,Crhr2,Ctnna3,Cul3,Cyp1b1,Cyria,Cyria,Dbn1,Des,Diaph1,Diaph3,Dst,Dync1h1,Edn1,Elmo1,Enah,Ext1,Fbln5,Fhdc1,Fhod3,Gpr65,Hmcn1,Hook1,Inpp5k,Katnbl1,Lmod3,Loxl4,Lpar1,Map1b,Map3k1,Mapt,Mef2a,Mef2c,Mical3,Mid1,Mid1ip1,Myl2,Myl9,Myo1c,Nrap,P3h1,Pak1,Pakap,Pakap,Pde4di…
GO:0042326	negative regulation of phosphorylation	1.71206	112	65.4181	5.04e-06	1.69378	61	36.0141	0.000862	Adora2a,Ajuba,Angpt1,Apoe,Atg14,Cactin,Camk2n1,Cd109,Cdkn1a,Cdkn2b,Cnksr3,Ctdsp2,Ctdspl,Dab2ip,Drd2,Dtnbp1,Dusp10,Dusp6,Errfi1,Fabp4,Gadd45g,Gpd1l,Inpp5k,Insr,Jun,Kat2b,Lrp1,Macroh2a1,Mapt,Ntf3,Pard3,Pbk,Pebp1,Pecam1,Pip4k2a,Pkig,Plpp3,Ppargc1a,Ppp1r15b,Ppp2r5a,Prkag2,Prkar1b,Pten,Ptpn1,Sfrp1,Sh3bp5l,Shb,Sirpb1c,Smad6,Smad7,Socs5,Sorl1,Spry1,Spry2,Spry4,Stk39,Tfap4,Tgfb1,Trib1,Ubash3b,Xdh
GO:0051347	positive regulation of transferase activity	1.56275	155	99.1841	5.48e-06	1.8466	92	49.8212	7.4e-07	Adra1a,Agtr1b,Ajuba,Akap13,Alk,Angpt1,Apoe,App,Atg14,Camkk1,Card10,Cartpt,Ccn1,Ccnd1,Cd40,Cdkn1a,Cemip,Cops8,Dab2ip,Dag1,Dcun1d1,Ddx3x,Dlg3,Drd2,Edn1,Epha4,Ephb3,Erbb4,Etaa1,Fbxw7,Fgf1,Fgfr1,Flt1,Fzd4,Fzd5,Ghr,Grhl2,Hmga2,Igf1r,Insr,Itgb3,Kdr,Kitl,Klf4,Map2k3,Map3k1,Map3k12,Map3k5,Map3k7,Mmd,Mnat1,Musk,Myc,Neurl1a,Ntf3,Pak1,Parn,Parp16,Pdgfa,Pdgfb,Pdgfra,Pfkfb2,Pik3cg,Pik3r5,Prkag2,Prkcq,Pten,Ptk…
GO:0030335	positive regulation of cell migration	1.51637	173	114.088	5.48e-06	1.87175	105	56.0971	7.26e-08	Ackr3,Actr3,Acvr1,Adora3,Akap12,Akt3,Angpt1,Anxa1,App,Aqp1,Bcl2,Ccbe1,Ccl2,Ccn1,Cd274,Cd40,Cemip,Clasp1,Cldn4,Cyp1b1,Dab2ip,Dapk2,Diaph1,Edn1,Ednra,Elp3,Epha4,Erbb4,Ets1,Fgf1,Fgfbp1,Fgfr1,Flt1,Foxp1,Fzd4,Gpi1,Hdac7,Hdac9,Hif1a,Igf1r,Igfbp5,Il6st,Insr,Iqsec1,Itga6,Itgb3,Jcad,Jun,Kdr,Kitl,Lamb1,Lpar1,Lrp1,Map2k3,Map4k4,Mgat5,Myc,Myo1c,Nos3,Nr4a3,Ntf3,Pak1,Pdgfa,Pdgfb,Pdgfra,Pecam1,Pik3c2a,Pik3cg,Pi…
GO:0033002	muscle cell proliferation	1.74674	105	60.112	5.54e-06	2.23936	56	25.0071	9.67e-07	Agtr1b,Akr1b3,Angpt1,Apod,Apoe,Bmpr1a,Calcrl,Cdk1,Cdkn1a,Edn1,Ednra,Erbb4,Fgf1,Fgfr1,Flt1,Foxp1,Gata6,Gna12,Hif1a,Igf1r,Igfbp5,Itgb3,Jun,Klf4,Mef2c,Megf10,Mnat1,Myc,Nampt,Nos3,Nr4a3,Pak1,Pdgfb,Pik3ca,Pik3r1,Ppard,Ppargc1a,Pten,Rbm10,Rgs5,S1pr1,Six1,Six5,Smad1,Tafa5,Tbx20,Tenm4,Tert,Tgfb1,Tgfb2,Tgfb3,Tgfbr2,Tpm1,Trib1,Vegfa,Vgll4
GO:2001056	positive regulation of cysteine-type endopeptidase activity	2.3694	49	20.6803	6.28e-06	1.81841	23	12.6484	0.0341	Acer2,App,Asph,Bcap31,Bcl10,Bcl2l11,Bid,Bok,Cck,Ccn1,Ccn2,Cradd,Dapk1,Ddx3x,Gramd4,Map3k5,Myc,Ngf,Smad3,Sox7,Tbc1d10a,Tfap4,Xdh
GO:0000165	MAPK cascade	1.43279	217	151.453	6.37e-06	1.60272	119	74.249	8.84e-06	Ackr3,Adra1a,Ajuba,Akap12,Akap13,Alk,Angpt1,Apoe,App,Atp6ap2,Bcar3,Cartpt,Ccl2,Ccn1,Ccn2,Cd40,Cdh2,Cnksr3,Crhr2,Dab2ip,Dact1,Dag1,Denn2b,Drd2,Dusp10,Dusp6,Edn1,Ednra,Epha4,Erbb4,Errfi1,Fbxw7,Fgf1,Fgf23,Fgfr1,Flt1,Fzd4,Fzd5,Gadd45g,Garem1,Ghr,Hrh4,Igf1r,Inpp5k,Insr,Itgb3,Jcad,Jun,Kdr,Kitl,Klf4,Lbh,Lepr,Lmnb1,Lpar1,Lrp1,Map2k3,Map3k1,Map3k12,Map3k5,Map3k7,Map4k3,Map4k4,Mef2a,Mef2c,Mfhas1,Mid1,Myc,N…
GO:0045766	positive regulation of angiogenesis	2.00104	71	35.4815	6.37e-06	2.07141	36	17.3795	0.000612	Agtr1b,Akt3,Aqp1,Btg1,Ccbe1,Cd34,Cd40,Cyp1b1,Ddah1,Ets1,Fgf1,Flt1,Gata6,Hif1a,Hk2,Hmga2,Itgb3,Jcad,Kdr,Klf4,Ninj1,Nos3,Pdcl3,Prkd1,Prkd2,Ptk2b,Rapgef3,Sash1,Smad1,Tbxa2r,Tek,Tert,Tgfbr2,Tjp1,Tlr3,Vegfa
GO:0060395	SMAD protein signal transduction	2.45884	45	18.3013	6.37e-06	2.09344	19	9.07595	0.0185	Bmpr1a,Inhbb,Inhbe,Jade2,Jun,Lnpep,Lrp1,Rbpms,Smad1,Smad2,Smad3,Smad6,Smad7,Sptbn1,Tgfb1,Tgfb2,Tgfb3,Tob1,Zmiz1
GO:0043549	regulation of kinase activity	1.4756	187	126.728	8.78e-06	1.74642	115	65.8489	3.09e-07	Adora2a,Adra1a,Agtr1b,Ajuba,Akap13,Alk,Angpt1,Apoe,App,Atg14,Camk2n1,Camkk1,Card10,Cartpt,Ccn1,Ccnd1,Ccnj,Ccnl1,Cd40,Cdkn1a,Cdkn2b,Cemip,Cops8,Dab2ip,Dag1,Ddx3x,Dlg3,Drd2,Dtnbp1,Dusp10,Edn1,Epha4,Ephb3,Erbb4,Errfi1,Etaa1,Fabp4,Fbxw7,Fgf1,Fgfr1,Flt1,Fzd4,Fzd5,Gadd45g,Ghr,Hmga2,Igf1r,Inpp5k,Insr,Itgb3,Kat2b,Kdr,Kitl,Macroh2a1,Map2k3,Map3k1,Map3k12,Map3k5,Map3k7,Mapt,Mmd,Mnat1,Musk,Neurl1a,Ntf3,Pak1…
GO:0045860	positive regulation of protein kinase activity	1.69013	111	65.6754	8.98e-06	1.96427	66	33.6003	5.92e-06	Adra1a,Agtr1b,Ajuba,Akap13,Angpt1,App,Camkk1,Card10,Cartpt,Ccn1,Ccnd1,Cd40,Cdkn1a,Cemip,Cops8,Dab2ip,Dag1,Ddx3x,Dlg3,Drd2,Edn1,Epha4,Etaa1,Fbxw7,Fgf1,Fgfr1,Flt1,Fzd4,Fzd5,Ghr,Hmga2,Insr,Itgb3,Kitl,Map2k3,Map3k1,Map3k12,Map3k5,Map3k7,Mmd,Mnat1,Neurl1a,Ntf3,Pak1,Parp16,Pdgfa,Pdgfb,Pik3cg,Pik3r5,Prkag2,Ptk2b,Ptpn1,Ralb,Rap1a,Rgcc,Sash1,Snx9,Tab2,Taok3,Tead1,Tgfb1,Tgfb2,Tgfbr2,Vegfa,Vldlr,Zeb2
GO:0031329	regulation of cellular catabolic process	1.51406	168	110.96	9.31e-06	1.45026	106	73.0904	0.00143	Acer2,Adra1a,Apoe,App,Aqp11,Atf6,Atg14,Atg16l1,Atg7,Bcap31,Bcl2,Bcl2l11,Bid,Bok,Ccar2,Cnot8,Cop1,Dab2ip,Dapk1,Dapl1,Dazl,Dcn,Dcp2,Depdc5,Disc1,E2f1,Epha4,Esrrb,Fam122a,Fbxw7,Fbxw8,Fez1,Fez2,Gna12,Gpd1,Gpsm1,Grsf1,Gtpbp1,Hif1a,Ikbke,Insr,Kdr,Lepr,Lrp1,Map3k7,Mapt,Mtmr2,Mtmr4,Myc,Mylip,N4bp1,Nampt,Npc1,Nprl3,Pafah1b2,Pam16l,Parn,Pbk,Pdcl3,Pik3c2a,Pik3cg,Pip4k2a,Plin5,Ppp1cb,Ppp1r3b,Prkd1,Pten,Ptk2b…
GO:0030155	regulation of cell adhesion	1.42741	213	149.221	9.96e-06	1.55356	114	73.38	5.33e-05	Acer2,Adgrg1,Adora2a,Afdn,Angpt1,Ank3,Anxa1,Apod,Arid1b,Bcl10,Bcl2,Bst1,Card11,Cask,Ccdc88b,Ccl2,Ccn1,Cd274,Cd40lg,Cd83,Cebpb,Clasp1,Coro2b,Cyp1b1,Dag1,Dbn1,Disc1,Dscaml1,Dusp10,Ecm2,Efna5,Efnb1,Efnb2,Egflam,Epcam,Epha4,Ephb3,Ets1,Fzd4,Hlx,Icos,Il6st,Itga6,Itgb3,Kdr,Kitl,Klf4,Lama1,Lama3,Lama4,Lamb1,Lrp1,Mad1l1,Map4k4,Megf10,Nfkbiz,Ninj1,Npy,Nr4a3,Nuak1,Pag1,Pdgfb,Pik3r1,Pla2g2d,Plpp3,Plxna1,Plxn…
GO:0030279	negative regulation of ossification	3.27588	27	8.24207	1.04e-05	2.89034	12	4.15176	0.00918	Bcl2,Bcor,Fgf23,Hif1a,Mef2c,Ptk2b,Rflnb,Sfrp1,Smad6,Smad7,Tgfb1,Vdr
GO:0043502	regulation of muscle adaptation	2.46686	43	17.4311	1.04e-05	2.25153	20	8.88284	0.00718	Adra1a,Adrb1,Ctdp1,Edn1,Errfi1,Foxp1,Igfbp5,Klf4,Mef2a,Mef2c,Mlip,Nfatc1,Nos3,Nr3c1,Nr4a3,Pak1,Rgs4,Slc9a1,Smad3,Tead1
GO:0043500	muscle adaptation	2.33025	48	20.5986	1.04e-05	1.98135	22	11.1036	0.0179	Adra1a,Adrb1,Ctdp1,Edn1,Errfi1,Foxp1,Gata6,Igfbp5,Klf4,Mef2a,Mef2c,Mlip,Nfatc1,Nfatc3,Nos3,Nr3c1,Nr4a3,Pak1,Rgs4,Slc9a1,Smad3,Tead1
GO:0032909	regulation of transforming growth factor beta2 production	6.50724	13	1.99777	1.24e-05	5.75391	5	0.868974	0.0114	Bmpr1a,Gata6,Hif1a,Smad3,Tgfb2
GO:0061049	cell growth involved in cardiac muscle cell development	3.23986	27	8.33371	1.26e-05	2.92122	11	3.76555	0.0127	Adra1a,Adrb1,Akap13,Ctdp1,Edn1,Foxp1,Nr3c1,Pak1,Pdlim5,Rgs4,Sorbs2
GO:0043065	positive regulation of apoptotic process	1.51658	160	105.5	1.34e-05	1.68323	98	58.2212	1.16e-05	Adora2a,Adrb1,Akap12,Anxa1,App,Atf6,Atg7,B4galt1,Bcap31,Bcl10,Bcl2l11,Bcl2l14,Bid,Bin1,Bmpr1b,Bok,Btg1,Bub1,Camk2a,Ccar2,Cck,Ccl2,Ccn1,Cd274,Cd40,Cd40lg,Cradd,Creb1,Ctnnbl1,Cyp1b1,Dab2ip,Dapk1,Dapk2,Ddx20,Ddx3x,Dusp6,E2f1,Efhc1,Erbb4,Fbxw7,Fndc1,Fosl1,G0s2,Gadd45g,Gata6,Hif1a,Hmga2,Ing3,Inhbb,Inpp5d,Itga6,Itpr1,Jun,Kcnma1,Lpar1,Map3k1,Map3k5,Mef2c,Musk,Myc,Neurl1a,Nos3,Notch2,Nr3c1,Nr4a3,Phlda1,P…
GO:0010942	positive regulation of cell death	1.48744	175	117.652	1.38e-05	1.64565	109	66.2351	8.38e-06	Acer2,Adora2a,Adrb1,Akap12,Anxa1,Apoe,App,Atf6,Atg7,B4galt1,Bcap31,Bcl10,Bcl2l11,Bcl2l14,Bid,Bin1,Bmpr1b,Bok,Btg1,Bub1,Camk2a,Ccar2,Cck,Ccl2,Ccn1,Ccn2,Cd274,Cd40,Cd40lg,Cdkn1a,Cradd,Creb1,Ctnnbl1,Cyp1b1,Dab2ip,Dapk1,Dapk2,Ddx20,Ddx3x,Dnmt3a,Dusp6,E2f1,Efhc1,Efnb2,Erbb4,Fbxw7,Fndc1,Fosl1,Foxp1,G0s2,Gadd45g,Gata6,Hif1a,Hmga2,Ing3,Inhbb,Inpp5d,Itga6,Itpr1,Jun,Kcnma1,Lpar1,Lrp1,Map3k1,Map3k5,Mapt,Mef…
GO:0090036	regulation of protein kinase C signaling	4.2716	19	4.44798	1.39e-05	3.60245	8	2.22071	0.0138	Adra1a,Akap12,Capzb,Cd40,Gpd1l,Phlpp1,Pla2g6,Vegfa
GO:0043068	positive regulation of programmed cell death	1.51481	161	106.284	1.39e-05	1.6754	99	59.0902	1.2e-05	Adora2a,Adrb1,Akap12,Anxa1,App,Atf6,Atg7,B4galt1,Bcap31,Bcl10,Bcl2l11,Bcl2l14,Bid,Bin1,Bmpr1b,Bok,Btg1,Bub1,Camk2a,Ccar2,Cck,Ccl2,Ccn1,Cd274,Cd40,Cd40lg,Cdkn1a,Cradd,Creb1,Ctnnbl1,Cyp1b1,Dab2ip,Dapk1,Dapk2,Ddx20,Ddx3x,Dusp6,E2f1,Efhc1,Erbb4,Fbxw7,Fndc1,Fosl1,G0s2,Gadd45g,Gata6,Hif1a,Hmga2,Ing3,Inhbb,Inpp5d,Itga6,Itpr1,Jun,Kcnma1,Lpar1,Map3k1,Map3k5,Mef2c,Musk,Myc,Neurl1a,Nos3,Notch2,Nr3c1,Nr4a3,P…
GO:0040017	positive regulation of locomotion	1.47665	178	120.543	1.41e-05	1.82673	109	59.6695	1.06e-07	Ackr3,Actr3,Acvr1,Adora3,Akap12,Akt3,Angpt1,Anxa1,App,Aqp1,Bcl2,Ccbe1,Ccl2,Ccn1,Cd274,Cd40,Cemip,Cfap20,Clasp1,Cldn4,Cyp1b1,Dab2ip,Dapk2,Diaph1,Edn1,Ednra,Elp3,Epcam,Epha4,Erbb4,Ets1,Fgf1,Fgfbp1,Fgfr1,Flt1,Foxp1,Fzd4,Gpi1,Hdac7,Hdac9,Hif1a,Igf1r,Igfbp5,Il6st,Insr,Iqsec1,Itga6,Itgb3,Jcad,Jun,Kdr,Kitl,Lamb1,Lpar1,Lrp1,Map2k3,Map4k4,Mgat5,Myc,Myo1c,Nos3,Nr4a3,Ntf3,Pak1,Pdgfa,Pdgfb,Pdgfra,Pecam1,Pik3…
GO:0030334	regulation of cell migration	1.35474	266	196.347	1.64e-05	1.8202	171	93.9457	8.02e-12	Abcc8,Ackr3,Actr3,Acvr1,Adgrg1,Adora3,Afdn,Ajuba,Akap12,Akt3,Amotl2,Angpt1,Anxa1,Apod,Apoe,App,Aqp1,Arap3,Arsb,Bcl2,Bcr,Bmpr1a,Bst1,Camk2a,Card10,Ccbe1,Ccl2,Ccn1,Cd274,Cd40,Cemip,Clasp1,Cldn19,Cldn4,Cyp1b1,Dab2ip,Dag1,Dapk2,Dcn,Diaph1,Drd2,Dusp10,Edn1,Ednra,Elp3,Epha4,Erbb4,Ets1,Fbxw7,Fgf1,Fgf23,Fgf6,Fgfbp1,Fgfr1,Flt1,Foxp1,Fzd4,Gna12,Gpi1,Gsx2,Hdac7,Hdac9,Hif1a,Idh2,Igf1r,Igfbp5,Il6st,Insr,Iqsec…
GO:0045823	positive regulation of heart contraction	3.02354	29	9.59141	1.65e-05	2.58926	10	3.86211	0.0374	Adra1a,Adrb1,Atp1a1,Ccn2,Crhr2,Edn1,Kcnq1,Rgs4,Tgfb2,Tpm1
GO:0010634	positive regulation of epithelial cell migration	1.87785	76	40.4718	2.01e-05	2.4438	42	17.1864	3.7e-06	Akt3,Angpt1,Anxa1,Aqp1,Ccbe1,Cd40,Clasp1,Ets1,Fgf1,Fgfbp1,Fgfr1,Foxp1,Gpi1,Hdac7,Hdac9,Hif1a,Iqsec1,Itgb3,Jcad,Jun,Kdr,Map2k3,Map4k4,Nos3,Pdgfb,Pik3c2a,Pik3cg,Plpp3,Prkce,Prkd1,Prkd2,Ptk2b,Rab11a,Rin2,Sash1,Sparc,Srpx2,Tek,Tgfb1,Tgfb2,Tgfbr2,Vegfa
GO:0043087	regulation of GTPase activity	1.65385	112	67.7209	2.05e-05	2.02838	66	32.5382	2.14e-06	Adrb1,Afdn,Ajuba,Arap2,Arap3,Arhgap29,Asap1,Bcar3,Bcr,Bin1,Ccl2,Cd40,Dab2ip,Dennd1b,Dgki,Dock9,Efna5,Eif5,Epha4,Ephb3,Gapvd1,Gnao1,Gpr65,Gpsm1,Iqsec1,Itga6,Lrch1,Map4k4,Mtss2,Ntf3,Pecam1,Pkp4,Plxna1,Plxna2,Plxnc1,Prex1,Ptk2b,Ralgapa2,Ralgps1,Rap1a,Rapgef3,Rasa2,Rgma,Rgs4,Rgs6,Ric1,S100a10,S1pr1,Sh3bp4,Sipa1l2,Snx18,Snx9,Spry1,Spry2,Srgap2,Tbc1d1,Tbc1d10a,Tbc1d20,Tbc1d22a,Tbc1d30,Tbc1d4,Tbc1d7,Tbc…
GO:0010506	regulation of autophagy	1.83023	82	44.8032	2.16e-05	1.65425	46	27.8072	0.00764	Acer2,Adra1a,Atf6,Atg14,Atg16l1,Atg7,Bcl2,Bcl2l11,Bid,Bok,Dapk1,Dapl1,Dcn,Depdc5,Fbxw7,Fez1,Fez2,Gpsm1,Hif1a,Kdr,Lepr,Map3k7,Mapt,Mtmr4,Nampt,Npc1,Nprl3,Pafah1b2,Pik3c2a,Pip4k2a,Prkd1,Ralb,Scoc,Sec22b,Sesn3,Sh3bp4,Snx18,Sptlc2,Srebf1,Tpcn2,Trim8,Usp13,Usp36,Vps13c,Vps13d,Wac
GO:0051301	cell division	1.55767	139	89.2357	2.19e-05	1.47958	80	54.0695	0.00435	Aatf,Actr3,Ahctf1,Anapc1,Bod1,Bub1,Cables1,Calm1,Calm2,Ccnd1,Cdc14a,Cdc25a,Cdk1,Cep164,Cetn3,Clasp1,Ctdp1,Cul3,Drd2,Dync1h1,Dync1li1,Efhc1,Epb41,Epb41l2,Esrrb,Ext1,Fbxl7,Fgf1,Fgf6,Fgfr1,Fign,Garem1,Haus3,Haus4,Haus7,Hmcn1,Hmga2,Igf1r,Insc,Intu,Klhl42,Lbh,Lig3,Llgl2,Mad1l1,Map4,Mical3,Myc,Ncapg2,Nek9,Nsmce2,Pard3,Pdgfa,Pdgfb,Pkp4,Pou3f3,Ppp1cb,Prkce,Prok1,Rab11a,Ralb,Rbbp8,Septin4,Septin6,Septin9,…
GO:0051302	regulation of cell division	2.03044	61	30.0428	2.19e-05	1.66665	28	16.8002	0.0436	Ahctf1,Calm1,Calm2,Cdc14a,Cul3,Drd2,Efhc1,Esrrb,Fgf1,Fgf6,Garem1,Igf1r,Insc,Intu,Lbh,Myc,Pdgfa,Pdgfb,Pkp4,Prkce,Prok1,Rab11a,Sfn,Tal1,Tgfb1,Tgfb2,Tgfb3,Vegfa
GO:0010632	regulation of epithelial cell migration	1.69477	102	60.1852	2.26e-05	2.36282	60	25.3933	7.5e-08	Akt3,Angpt1,Anxa1,Apoe,Aqp1,Arsb,Card10,Ccbe1,Cd40,Clasp1,Dab2ip,Dcn,Dusp10,Ets1,Fbxw7,Fgf1,Fgfbp1,Fgfr1,Foxp1,Gpi1,Hdac7,Hdac9,Hif1a,Iqsec1,Itgb3,Jcad,Jun,Kdr,Klf4,Map2k3,Map4k4,Mcc,Mef2c,Meox2,Nos3,Pdgfb,Pik3c2a,Pik3cg,Plpp3,Prcp,Prkce,Prkd1,Prkd2,Pten,Ptk2b,Rab11a,Rgcc,Rin2,Sash1,Sema3a,Sparc,Srpx2,Stc1,Tbxa2r,Tek,Tgfb1,Tgfb2,Tgfbr2,Vash1,Vegfa
GO:0048660	regulation of smooth muscle cell proliferation	1.87666	73	38.899	2.64e-05	2.38561	41	17.1864	8.48e-06	Agtr1b,Akr1b3,Apod,Apoe,Bmpr1a,Calcrl,Cdkn1a,Edn1,Flt1,Foxp1,Gna12,Hif1a,Igf1r,Igfbp5,Itgb3,Jun,Klf4,Mef2c,Mnat1,Myc,Nampt,Nos3,Nr4a3,Pak1,Pdgfb,Pik3ca,Pik3r1,Ppard,Ppargc1a,Pten,Rbm10,Rgs5,S1pr1,Tafa5,Tert,Tgfb1,Tgfb3,Tgfbr2,Tpm1,Trib1,Vegfa
GO:0010950	positive regulation of endopeptidase activity	2.18022	51	23.3922	2.64e-05	1.72617	25	14.4829	0.0429	Acer2,Aph1b,App,Asph,Bcap31,Bcl10,Bcl2l11,Bid,Bok,Cck,Ccn1,Ccn2,Cradd,Dapk1,Ddx3x,Epha4,Gramd4,Map3k5,Myc,Ngf,Smad3,Sox7,Tbc1d10a,Tfap4,Xdh
GO:0008015	blood circulation	1.6951	101	59.5836	2.65e-05	2.16112	53	24.5244	5.09e-06	Adra1a,Adrb1,Agtr1b,App,Atp1a1,Atp1b1,Bin1,Calm1,Calm2,Ccn2,Chd7,Crhr2,Ctnna3,Drd2,Dsg2,Edn1,Ednra,Ehd3,Epas1,Fli1,Gnao1,Gpd1l,Hif1a,Hrh2,Kcnd3,Kcnq1,Mef2a,Myl2,Nos1ap,Nos3,Pde4b,Pdgfb,Pebp1,Pik3r1,Popdc2,Rbfox2,Rgs4,Sema3a,Slc4a3,Slc9a1,Smad6,Smad7,Smtnl2,Srebf1,Stc1,Tbx20,Tbxa2r,Tgfb2,Thrb,Tmem38b,Tpm1,Trpv1,Zdhhc21
GO:0006984	ER-nucleus signaling pathway	3.56062	22	6.17869	2.71e-05	2.76188	12	4.34487	0.013	Arhgef10l,Atf6,Bcl2l11,Bid,Bok,Erlin2,Ppp1r15b,Ptpn1,Qrich1,Spring1,Srebf1,Zbtb7b
GO:0048661	positive regulation of smooth muscle cell proliferation	2.1906	50	22.8248	3.19e-05	2.37547	25	10.5242	0.000997	Agtr1b,Akr1b3,Bmpr1a,Calcrl,Edn1,Flt1,Foxp1,Hif1a,Igf1r,Igfbp5,Itgb3,Jun,Mnat1,Myc,Nampt,Nr4a3,Pak1,Pdgfb,Pik3ca,Ppargc1a,S1pr1,Tert,Tgfb1,Tgfbr2,Vegfa
GO:0043408	regulation of MAPK cascade	1.42472	196	137.571	3.28e-05	1.6229	110	67.78	1.29e-05	Ackr3,Adra1a,Ajuba,Akap12,Akap13,Alk,Angpt1,Apoe,App,Atp6ap2,Bcar3,Cartpt,Ccl2,Ccn1,Ccn2,Cd40,Cdh2,Cnksr3,Crhr2,Dab2ip,Dact1,Dag1,Denn2b,Drd2,Dusp10,Dusp6,Edn1,Ednra,Epha4,Erbb4,Errfi1,Fbxw7,Fgf1,Fgf23,Fgfr1,Flt1,Fzd4,Fzd5,Gadd45g,Garem1,Ghr,Hrh4,Igf1r,Inpp5k,Insr,Itgb3,Jcad,Jun,Kdr,Kitl,Klf4,Lbh,Lepr,Lmnb1,Lpar1,Lrp1,Map2k3,Map3k1,Map3k12,Map3k5,Map3k7,Map4k4,Mfhas1,Mid1,Ngf,Notch2,Npy,Ntf3,P2ry…
GO:0009725	response to hormone	1.54941	135	87.1298	3.38e-05	1.55457	77	49.5315	0.00157	Aanat,Acaca,Adra1a,Agtr1b,Akt3,Anxa1,Aqp1,Arsb,Atp1a1,Bcl2,Ccnd1,Creb1,Crhr2,Cry2,Edn1,Ednra,Efna5,Gata6,Ghr,Glp2r,Hdac9,Igf1r,Inpp5k,Insr,Kat2b,Kcnma1,Kcnq1,Klf9,Lepr,Lpin1,Lpl,Mb,Mef2c,Mme,Myo1c,Myod1,Ncoa2,Nos3,Npc1,Nr3c1,Nr4a3,Nucb2,Pak1,Pik3r1,Pip4k2a,Ppargc1a,Prkce,Prkci,Prkcq,Pten,Ptgdr,Rab31,Rab8b,Sesn3,Sfrp1,Sgk1,Slc9a1,Sorbs1,Sorl1,Sort1,Srf,Stk39,Tbc1d4,Tbl1x,Tek,Tfap4,Tgfb1,Tgfb2,Tgfb…
GO:0051338	regulation of transferase activity	1.40694	204	144.996	3.65e-05	1.60334	124	77.3387	5.53e-06	Adora2a,Adra1a,Agtr1b,Ajuba,Akap13,Alk,Angpt1,Apoe,App,Atg14,Camk2n1,Camkk1,Card10,Cartpt,Ccn1,Ccnd1,Ccnj,Ccnl1,Cd40,Cdkn1a,Cdkn2b,Cemip,Cops8,Dab2ip,Dag1,Dcun1d1,Ddx3x,Dlg3,Drd2,Dtnbp1,Dusp10,Edn1,Epha4,Ephb3,Erbb4,Errfi1,Etaa1,Fabp4,Fbxw7,Fgf1,Fgfr1,Flt1,Fzd4,Fzd5,Gadd45g,Ghr,Grhl2,Hmga2,Igf1r,Inpp5k,Insr,Itgb3,Kat2b,Kdr,Kitl,Klf4,Macroh2a1,Map2k3,Map3k1,Map3k12,Map3k5,Map3k7,Mapt,Mmd,Mnat1,Mus…
GO:0001667	ameboidal-type cell migration	1.49908	155	103.397	3.65e-05	2.07141	93	44.897	6.64e-09	Actr3,Acvr1,Akap12,Akt3,Angpt1,Anxa1,Anxa6,Apoe,Aqp1,Arid5b,Arsb,Card10,Ccbe1,Cd40,Cdh2,Clasp1,Cyp1b1,Dab2ip,Dcn,Dusp10,Edn1,Ednra,Efnb1,Efnb2,Erbb4,Ets1,Fat2,Fbxw7,Fgf1,Fgfbp1,Fgfr1,Fndc3b,Foxp1,Gna12,Gpi1,Hdac7,Hdac9,Hif1a,Iqsec1,Itgb3,Jcad,Jun,Kdr,Kitl,Klf4,Map2k3,Map4k4,Mcc,Mef2c,Meox2,Nos3,Nrp2,Pak1,Pdgfb,Pdlim1,Pecam1,Pik3c2a,Pik3cg,Plpp3,Ppard,Prcp,Prkce,Prkd1,Prkd2,Pten,Ptk2b,Rab11a,Rffl,…
GO:0060047	heart contraction	1.74913	88	50.3108	3.65e-05	2.45849	47	19.1174	7.57e-07	Actc1,Adra1a,Adrb1,Atp1a1,Atp1b1,Bin1,Calm1,Calm2,Ccn2,Crhr2,Ctnna3,Drd2,Dsg2,Edn1,Ednra,Ehd3,Epas1,Ext1,Gata6,Gnao1,Gpd1l,Kcnd3,Kcnq1,Mef2a,Myl2,Nos1ap,Nos3,Pde4b,Pebp1,Pik3r1,Popdc2,Rbfox2,Rgs4,Rnls,Rps6ka2,Sema3a,Sgcd,Slc4a3,Slc9a1,Smad7,Srebf1,Stc1,Tgfb2,Thrb,Tmem38b,Tpm1,Trpv1
GO:0031400	negative regulation of protein modification process	1.56599	129	82.376	3.84e-05	1.45874	70	47.9867	0.0118	Adora2a,Angpt1,Apoe,Atg14,Atg7,Bcor,Bod1,Cactin,Camk2n1,Cd109,Cdkn1a,Cnksr3,Cry2,Ctdsp2,Ctdspl,Dab2ip,Drd2,Dtnbp1,Dusp10,Dusp6,Errfi1,Fabp4,Gadd45g,Gpd1l,Hmg20a,Inpp5k,Insr,Ivns1abp,Jun,Kat2b,Lrp1,Macroh2a1,Mapt,Mfhas1,Mgat5,N4bp1,Ntf3,Nxn,P3h1,Pard3,Pbk,Pebp1,Pecam1,Pkig,Plpp3,Ppargc1a,Ppp1r15b,Prkag2,Prkar1b,Prkce,Pten,Ptpn1,Sfrp1,Sh3bp5l,Shb,Sirpb1c,Smad6,Smad7,Socs5,Sorl1,Spry1,Spry2,Spry4,St…
GO:0043116	negative regulation of vascular permeability	3.56944	21	5.88327	4.15e-05	3.62497	7	1.93105	0.0224	Abcc8,Adora2a,Akap12,Angpt1,Ddah1,Nr3c1,Vegfa
GO:0010952	positive regulation of peptidase activity	2.11776	52	24.5542	4.4e-05	1.68302	26	15.4484	0.0488	Acer2,Aph1b,App,Asph,Bcap31,Bcl10,Bcl2l11,Bid,Bok,Cck,Ccn1,Ccn2,Cldn4,Cradd,Dapk1,Ddx3x,Epha4,Gramd4,Map3k5,Myc,Ngf,Smad3,Sox7,Tbc1d10a,Tfap4,Xdh
GO:0031401	positive regulation of protein modification process	1.36426	234	171.521	4.7e-05	1.50629	145	96.263	1.51e-05	Acvr1,Adra1a,Agtr1b,Ajuba,Akap13,Angpt1,App,Arntl,Atg14,Atg7,Bcar3,Bcl10,Bcl2,Bmpr1a,Calm1,Calm2,Camkk1,Camta1,Card10,Card14,Cartpt,Cck,Ccn1,Ccn2,Ccnd1,Cd40,Cdkn1a,Cemip,Cldn19,Cops8,Cul3,Dab2ip,Dag1,Dcun1d1,Ddx3x,Dip2b,Dlg3,Drd2,Dtnbp1,Edn1,Ednra,Efna5,Epha4,Erbb4,Etaa1,Fam20a,Fbxw7,Fgf1,Fgf23,Fgf6,Fgfr1,Flt1,Fndc1,Fzd4,Fzd5,Ghr,Gna12,Grk3,Hmga2,Il6st,Inhbb,Inhbe,Insr,Itgb3,Kansl1,Kat7,Kdr,Kitl,…
GO:0048659	smooth muscle cell proliferation	1.84119	74	40.1913	4.76e-05	2.33869	42	17.9588	1.02e-05	Agtr1b,Akr1b3,Apod,Apoe,Bmpr1a,Calcrl,Cdkn1a,Edn1,Ednra,Flt1,Foxp1,Gna12,Hif1a,Igf1r,Igfbp5,Itgb3,Jun,Klf4,Mef2c,Mnat1,Myc,Nampt,Nos3,Nr4a3,Pak1,Pdgfb,Pik3ca,Pik3r1,Ppard,Ppargc1a,Pten,Rbm10,Rgs5,S1pr1,Tafa5,Tert,Tgfb1,Tgfb3,Tgfbr2,Tpm1,Trib1,Vegfa
GO:0150115	cell-substrate junction organization	2.31419	42	18.1489	4.76e-05	2.41329	24	9.94492	0.00105	Actn1,Ajuba,Apod,Bcl2,Bcr,Clasp1,Coro2b,Dst,Efna5,Iqsec1,Itgb3,Kdr,Lrp1,Map4k4,Pik3r1,Pten,Ptk2b,Rab8b,S100a10,Smad3,Sorbs1,Tek,Tns1,Vegfa
GO:0008016	regulation of heart contraction	1.79013	80	44.6894	5.15e-05	2.33318	41	17.5726	1.38e-05	Adra1a,Adrb1,Atp1a1,Atp1b1,Bin1,Calm1,Calm2,Ccn2,Crhr2,Ctnna3,Drd2,Dsg2,Edn1,Ednra,Ehd3,Epas1,Gnao1,Gpd1l,Kcnd3,Kcnq1,Mef2a,Myl2,Nos1ap,Nos3,Pde4b,Pebp1,Pik3r1,Popdc2,Rbfox2,Rgs4,Sema3a,Slc4a3,Slc9a1,Smad7,Srebf1,Stc1,Tgfb2,Thrb,Tmem38b,Tpm1,Trpv1
GO:0045862	positive regulation of proteolysis	1.69581	94	55.4307	5.16e-05	1.55814	51	32.7313	0.0133	Acer2,Aph1b,Apoe,App,Asph,Atg7,Bcap31,Bcl10,Bcl2l11,Bid,Bok,Ccbe1,Cck,Ccn1,Ccn2,Cldn4,Cop1,Cradd,Dab2ip,Dapk1,Ddx3x,Disc1,Epha4,Fam122a,Fbxw11,Fbxw7,Fbxw8,Gramd4,Map3k5,Myc,Ngf,Pten,Ptk2b,Rgma,Rnf19a,Rnf217,Rnft2,S100a10,Smad3,Smad7,Snx9,Socs5,Sox7,Spon1,Tbc1d10a,Tfap4,Tnp1,Trib1,Trib2,Usp13,Xdh
GO:0090037	positive regulation of protein kinase C signaling	4.98536	14	2.80822	5.88e-05	3.98348	5	1.25518	0.048	Adra1a,Cd40,Phlpp1,Pla2g6,Vegfa
GO:0001570	vasculogenesis	2.15394	48	22.2848	5.92e-05	2.07141	19	9.1725	0.0203	Ackr3,Angpt1,Cd34,Fbxw7,Fgf1,Fgfr1,Fzd4,Hdac7,Kdr,Qki,Rap1a,Rin2,Tbx20,Tek,Tgfb1,Tgfbr2,Xdh,Zfp36l1,Zmiz1
GO:0019216	regulation of lipid metabolic process	1.64837	101	61.2726	5.92e-05	1.49905	55	36.69	0.019	Acadl,Alk,Anxa1,Apod,Apoe,App,Atg14,Atg7,Atp1a1,Ccn1,Creb1,Dab2ip,Ddx20,Dnajc15,Erbb4,Erlin2,Fabp5,Fgf1,Flt1,Igf1r,Kcnma1,Lmf1,Macroh2a1,Mid1ip1,Mtmr2,Mtmr4,Ncoa2,Nr3c1,Nr4a3,Nucb2,Pdgfa,Pdgfb,Pdgfra,Pik3cg,Pip4k2a,Pla2g6,Plin5,Ppard,Ppargc1a,Ppp2r5a,Prkag2,Prkce,Ptk2b,Rora,Rubcnl,Scd1,Sctr,Snai1,Sorbs1,Sorl1,Srebf1,Tek,Tgfb1,Thrb,Vav3
GO:0045859	regulation of protein kinase activity	1.4784	155	104.843	6.03e-05	1.75329	97	55.3247	2.69e-06	Adora2a,Adra1a,Agtr1b,Ajuba,Akap13,Angpt1,Apoe,App,Camk2n1,Camkk1,Card10,Cartpt,Ccn1,Ccnd1,Ccnj,Ccnl1,Cd40,Cdkn1a,Cdkn2b,Cemip,Cops8,Dab2ip,Dag1,Ddx3x,Dlg3,Drd2,Dtnbp1,Dusp10,Edn1,Epha4,Errfi1,Etaa1,Fabp4,Fbxw7,Fgf1,Fgfr1,Flt1,Fzd4,Fzd5,Gadd45g,Ghr,Hmga2,Inpp5k,Insr,Itgb3,Kat2b,Kitl,Macroh2a1,Map2k3,Map3k1,Map3k12,Map3k5,Map3k7,Mmd,Mnat1,Neurl1a,Ntf3,Pak1,Parp16,Pdgfa,Pdgfb,Pik3cg,Pik3r5,Pkig,Prk…
GO:1903522	regulation of blood circulation	1.66895	97	58.1205	6.03e-05	2.10509	50	23.752	1.9e-05	Adra1a,Adrb1,Agtr1b,App,Atp1a1,Atp1b1,Bin1,Calm1,Calm2,Ccn2,Crhr2,Ctnna3,Drd2,Dsg2,Edn1,Ednra,Ehd3,Epas1,Gnao1,Gpd1l,Hif1a,Hrh2,Kcnd3,Kcnq1,Mef2a,Myl2,Nos1ap,Nos3,Pde4b,Pdgfb,Pebp1,Pik3r1,Popdc2,Rbfox2,Rgs4,Sema3a,Slc4a3,Slc9a1,Smad6,Smad7,Smtnl2,Srebf1,Stc1,Tbxa2r,Tgfb2,Thrb,Tmem38b,Tpm1,Trpv1,Zdhhc21
GO:2001235	positive regulation of apoptotic signaling pathway	2.09179	51	24.381	6.12e-05	1.71518	26	15.1588	0.0409	Adora2a,Bcap31,Bcl10,Bcl2l11,Bcl2l14,Bid,Bmpr1b,Bok,Bub1,Cradd,Dab2ip,Fbxw7,G0s2,Inhbb,Myc,Ppp2r1b,Pten,Rbck1,Rpl26,Septin4,Serinc3,Sfrp1,Siah1a,Skil,Tgfb2,Zswim2
GO:0070371	ERK1 and ERK2 cascade	1.59356	113	70.9103	6.33e-05	1.80255	59	32.7313	0.000224	Ackr3,Adra1a,Akap12,Angpt1,Apoe,App,Ccl2,Ccn1,Ccn2,Cnksr3,Crhr2,Dab2ip,Denn2b,Drd2,Dusp10,Dusp6,Edn1,Ednra,Epha4,Erbb4,Errfi1,Fbxw7,Fgf1,Fgf23,Garem1,Itgb3,Jun,Kdr,Klf4,Lrp1,Map3k12,Mfhas1,Myc,Ngf,Notch2,Npy,P2ry1,Pdgfa,Pdgfb,Pdgfra,Phlpp1,Pla2g5,Prkd2,Pten,Ptk2b,Ptpn1,Rap1a,Sema6a,Sirpb1c,Spry1,Spry2,Spry4,Tek,Tgfb1,Thpo,Vegfa,Ywhaz,Zfp36l1,Zfp36l2
GO:0007264	small GTPase mediated signal transduction	1.57026	119	75.7838	7.12e-05	1.6601	67	40.359	0.000709	Abca1,Abra,Adcyap1r1,Adgrg1,Adra1a,Adrb1,Agtr1b,Akap13,Apoe,Arap3,Arhgap26,Arhgap28,Arhgap32,Arhgef28,Bcar3,Bcr,Ccdc88c,Cdc42bpa,Cdc42ep1,Cdc42ep3,Cdh2,Cul3,Cyth1,Cyth4,Dab2ip,Dennd3,Dennd4a,Dgki,Dock9,Ednra,Elmo1,Garre1,Gna12,Gpr17,Gpr65,Iqsec1,Jun,Kitl,Lpar1,Map4k4,Mapkap1,Ngf,Nisch,Notch2,Nucb2,Pecam1,Pik3cg,Plcd4,Prag1,Prkd1,Rab4a,Ralb,Ralgapa2,Ralgps1,Rap1a,Rapgef3,Rasa2,Rhou,Rras2,Sipa1l2,S…
GO:1902533	positive regulation of intracellular signal transduction	1.3615	225	165.258	7.72e-05	1.48111	138	93.1733	5.71e-05	1700037H04Rik,Abra,Ackr3,Adcyap1r1,Adgrg1,Adora3,Adra1a,Ajuba,Akap12,Akap13,Akt3,Alk,Angpt1,Apoe,App,Bcap31,Bcar3,Bcl10,Bcl2l11,Bid,Bok,Bub1,Camta1,Card11,Cartpt,Ccar2,Ccl2,Ccn2,Cd40,Cdh2,Crhr2,Dab2ip,Dcn,Ddx3x,Ddx60,Denn2b,Dgki,Dhx15,Drd2,Dync1li1,Edn1,Ednra,Epha4,Erbb4,Fbxw7,Fgf1,Fgf23,Fgfr1,Flt1,Fzd4,Fzd5,Gadd45g,Garem1,Ghr,Golph3,Gpr17,Gpr3,Gpr65,Hic1,Igf1r,Igfbp5,Insr,Itgb3,Jcad,Jun,Kdr,Kitl…
GO:0003012	muscle system process	1.57236	116	73.7742	9.23e-05	1.87077	69	36.8831	1.53e-05	Abcc8,Actc1,Adra1a,Adrb1,Anxa6,Atp1a1,Atp1b1,Bin1,Cacng1,Calcrl,Calm1,Calm2,Ccn2,Chrnb2,Ctdp1,Ctnna3,Dbn1,Drd2,Dsg2,Edn1,Ednra,Ehd3,Errfi1,Flt1,Foxp1,Gata6,Igfbp5,Kcnma1,Kcnq1,Klf4,Lmod3,Map2k3,Mef2a,Mef2c,Mlip,Myl1,Myl2,Neurog1,Nfatc1,Nfatc3,Nos3,Nr3c1,Nr4a3,P2ry1,Pak1,Pde4b,Pik3ca,Pla2g6,Rcsd1,Rgs4,Sgcd,Slc9a1,Smad3,Smad7,Srf,Stc1,Sulf2,Synm,Tbx20,Tbx3,Tbxa2r,Tead1,Tmem38b,Tmod1,Tpcn2,Tpm1,Trpv…
GO:0010639	negative regulation of organelle organization	1.64484	96	58.3644	0.000114	1.45166	52	35.821	0.0374	Arhgap28,Bok,Bub1,Capzb,Clasp1,Coro2b,Dbn1,Dcp2,Dync1li1,Fez1,Fez2,Fhod3,Fxn,Inpp5k,Kat2b,Lmod3,Mad1l1,Map1b,Map3k1,Map4,Mapt,Mid1,Mid1ip1,Mnat1,Mtbp,Nat10,Pam16l,Pecam1,Pik3ca,Pik3r1,Ppargc1a,Ppif,Rps6ka2,S1pr1,Sec22b,Setmar,Sgk1,Specc1l,Sptb,Sptbn1,Svil,Tbc1d30,Tbc1d4,Tbc1d7,Tinf2,Tjp1,Tmeff2,Tmod1,Tnks,Tom1l2,Tpm1,Wasf2
GO:0030324	lung development	1.96894	55	27.9338	0.000116	2.38304	26	10.9104	0.000701	Bmpr1a,Ccbe1,Ccn2,Cebpa,Cux1,Epas1,Fbxw7,Fgf1,Fgfr1,Foxp1,Gli2,Gpc3,Kdr,Mycn,Nfib,Nos3,Pdgfra,Sim2,Smad2,Sp3,Sparc,Spry2,Tgfbr2,Timeless,Vegfa,Ywhaz
GO:1902894	negative regulation of miRNA transcription	3.87348	17	4.38881	0.000118	4.14282	8	1.93105	0.00597	App,Gata6,Nfatc3,Nfib,Pdgfb,Ppard,Srf,Tgfb1
GO:0002062	chondrocyte differentiation	1.97972	54	27.2766	0.00013	2.6421	25	9.46216	0.000186	Anxa6,Bmpr1a,Bmpr1b,Ccn2,Creb3l2,Ext1,Fgfr1,Glg1,Gli2,Hif1a,Hmga2,Mef2c,Nfib,Pkdcc,Pthlh,Rarb,Rflnb,Smad3,Smad7,Snx19,Sox6,Tgfb1,Thrb,Zbtb16,Zfp219
GO:0043114	regulation of vascular permeability	2.88378	25	8.66917	0.000134	2.52611	10	3.95866	0.0428	Abcc8,Adora2a,Akap12,Angpt1,Bcr,Ddah1,Nr3c1,Tgfb1,Tjp1,Vegfa
GO:0014743	regulation of muscle hypertrophy	2.34013	36	15.3838	0.000143	2.23936	16	7.1449	0.0199	Adra1a,Adrb1,Ctdp1,Edn1,Errfi1,Foxp1,Igfbp5,Mef2a,Mef2c,Mlip,Nr3c1,Nr4a3,Pak1,Rgs4,Slc9a1,Smad3
