# Supplementary material for: Phylogenetic modeling of enhancer shifts in African mole-rats reveals regulatory changes associated with tissue-specific traits
Source: HighWire-hosted journal article supplement (doi:10.1101/gr.277715.123), 2023-08-25
Supplement: Supplemental_Table_S12.xlsx [file Supplemental_Table_S12.xlsx]

## Sheet: DNA primers used for 4C-seq
Table S12. Primer sequences used for 4C-seq and RT-QPCR (related to Figures 3, 4, S6 and S7). In each row, the table indicates the species, gene symbol for the promoter bait, primary and secondary enzymes used, and reading and non-reading primer sequences (4C-seq, first tab); and the targeted species and gene for RT-QPCR (second tab). Species abbreviations in RT-QPCR primer names are as follows: …
Species	Promoter bait	Primary RE	Reading primer	Secondary RE	Non-reading primer
Mmus	Igf1r	DpnII	TCCTTGTCCACGCCGCTTT	Csp6I	AGATGCAGAAGAAGGAGGA
Hgla	Igf1r	DpnII	GCAGCGCCCGGACGGGAGG	Csp6I	CCAGCCCCCCGCCCCGCACT
Hgla	Uox	NlaIII	TCTGAAGTTGAAGACCAAG	Csp6I	TTGCTCCTACTTGCAACTC
Hgla	Nebl internal promoter	DpnII	CGCAAATGCAAGGTCTTGA	NlaIII	TTTCCTACCTAATCTTAGT
Fdam	Nebl internal promoter	NlaIII	TGTAAACTACAAGTCTGGA	DpnII	ATGCACCCTTCTCTAATAT
Fdam	Ppargc1a	Csp6I	TCCGGCTTCAGGCAGCTCT	DpnII	TGGAGCCGAATTGGACTGC
Hgla	Ppargc1a	NlaIII	GGTTCTCAGCTGCCTTTTT	Csp6I	TAACATTTCTGAAGCTGGT

## Sheet: DNA primers used for RT-QPCR
Targeted species and gene	Primer sequence
Mm_IGF1R_F	AGTGTCCCTCAGGCTTCATC
Cp_Fd_IGF1R_F	AGTGTCCCTCGGGCTTCATC
Hg_IGF1R_F	AGTGTCCCTCCGGCTTCATC
Mm_IGF1R_R	TTCTCCAACTCCGAGGCAAT
Cp_Hg_Fd_IGF1R_R	TTCTCCAGTTCCGACGCAAT
Mm_TBP_F	CTCTGGAATTGTACCGCAGCT
Cp_TBP_F	CTCTGGGATCGTGCCGCAGCT
Hg_Fd_TBP_F	CTCTGGGATTGTGCCGCAGCT
Mm_TBP_R	GCTCCTGTGCACACCATTTT
Cp_TBP_R	GCTCCTGTGCACACCATCTT
Hg_Fd_TBP_R	GCTCCCGTGCACACCATTTT
Mm_Cp_Fd_Hg_UOX_F	CCAGTTCACTACCCTCCC
Mm_UOX_R	ATAGAGGGTCTTCTGCACGG
Cp_UOX_R	ATAGAGGGTCTTCTGGACAG
Hg_Fd_UOX_R	ATAGAGGGTCTTCTGGAGAG
Mm_NEBL_F	CACCGGCTTTGAGACATGTT
Cp_Hg_Fd_NEBL_F	CACCTAGTCTGAGACATGTT
Mm_NEBL_R	CTCTTCCTCACCCGTTCAG
Cp_NEBL_R	TTCTTCCTCACACGCTCTG
Hg_NEBL_R	TTCCTCCTCACGCGCTCTG
Fd_NEBL_R	TTCTTCCTCACGCGCTCTG
Mm_Cp_Fd_PPARGC1A_F	AGCCTCTTTGCCCAGATCTT
Hg_PPARGC1A_F	AGCCCCTTTGCCCAGATCTT
Mm_Fd_PPARGC1A_R	GGCAATCCGTCTTCATCCAC
Cp_PPARGC1A_R	GGCAATCCATCTTCGTCCAC
Hg_PPARGC1A_R	GGCAATCCGTCTTCGTCCAC
Mm_Hg_Fd_FOXP1_F	CAGGAACAGTTGCAGCTTCA
Cp_FOXP1_F	CAAGAACAGTTGCAGCTTCA
Mm_FOXP1_R	GGCTGAATTGTTAGGAGGC
Hg_Fd_Cp_FOXP1_R	GGCTGAATGGTTAGGAGGC
Mm_Fd_FOXO1_F	ATCACCAAGGCCATCGAGAG
Hg_FOXO1_F	ATCACTAAGGCCATCGAGAG
Cp_FOXO1_F	GGGTCTGTGCTGATCAAAAG
Mm_FOXO1_R	GTGAAGGGACAGATTGTGGC
Hg_Fd_FOXO1_R	GTGTAGGGACAGATTATGGC
Cp_FOXO1_R	GTGTAGGGACAGATTATGTC
Mm_NFATC3_F	TCACCCTTTACCTGGAGCAA
Cp_Hg_NFATC3_F	TCACCTTTTACCTGGAACAA
Fd_NFATC3_F	TCACCATTTACCTGGAACAA
Mm_Cp_Fd_Hg_NFATC3_R	CCCTCGGCTACCTTCAGTTT
Mm_INSR_F	AACGAGGAATGTGGGGATGT
Cp_INSR_F	AACGAGGAGTGCGGGGACAT
Fd_INSR_F	AACGAGGAATGTGGGGACAT
Hg_INSR_F	AATGAGGAGTGTGGAGACAT
Mm_INSR_R	TGTGCAGCCATGTGACTTAC
Cp_INSR_R	GGTACAGCCGTGGGACTTAC
Hg_INSR_R	GGTACAGCCGTGGGACTTGC
Fd_INSR_R	CGTGCAGCCGTGGGACTTGC
Mm_PPARA_F	GAACCGGAACAAATGCCAGT
Cp_PPARA_F	GAACCGCAACAAGTGCCAGT
Fd_Hg_PPARA_F	GAATCGGAACAAGTGCCAGT
Mm_PPARA_R	CTTCAGGTAGGCTTCGTGGA
Cp_Fd_Hg_PPARA_R	CTTCAGGTAGGCCTCGTAGA
Mm_ST6GALNAC3_F	CGCAACATGAGGAAGGATGG
Cp_Fd_ST6GALNAC3_F	CGCAATATGAGGAAGGATGG
Hg_ST6GALNAC3_F	CGAAATATGAGGAAGGATGG
Mm_ST6GALNAC3_R	CTGAGGTAGGAGCCAGACTG
Cp_Hg_ST6GALNAC3_R	CTGAGATAAGAGCCAGACTG
Fd_ST6GALNAC3_R	CTGAGGTAAGAGCCAGACTG
Mm_HACD3_F	CGGTGCCAAAGGAGACAATG
Cp_HACD3_F	TGGCGCCAAAGGAGACAATG
Fd_Hg_HACD3_F	TGGTGCCAAAGGAGACAATG
Mm_HACD3_R	CCACCAATGACTCCCCTTCT
Cp_Hg_HACD3_R	CCACCAGTGACTCACCTTCT
Fd_HACD3_R	CCACCACTGACTCACCTTCT
Mm_CERS6_F	TCTACCTTGCCTTCCCCTTG
Cp_CERS6_F	TCTACCTCGCCTTCCCGCTG
Fd_Hg_CERS6_F	TCTATCTCGCCTTCCCCC
Mm_CERS6_R	GTCTTTGTCGAAACCAGCGT
Cp_Fd_Hg_CERS6_R	GTCTTTGCCGAAACCAGCGC
Mm_EPAS1_F	TCAGCTTCCTTCGGACACAT
Cp_EPAS1_F	TCAGCTTCCTGCGGACCCAC
Hg_EPAS1_F	TCAGCTTCCTGCGGACACAC
Fd_EPAS1_F	TCAGCTTTCTGCGGACACAC
Mm_Fd_EPAS1_R	CCACAGCAATGAAACCCTCC
Cp_Hg_EPAS1_R	CCACAGCAATGAAACCTTCC
Mm_Cp_Fd_Hg_HIF1A_F	TGAGCTTGCTCATCAGTTGC
Mm_HIF1A_R	GCACCATCACAAAGCCATCT
Cp_Fd_Hg_HIF1A_R	GCACCATAACAAAGCCATCC
Mm_Fd_EGLN3_F	CCGGCTGGGCAAATACTATG
Cp_Hg_EGLN3_F	CCGGCTGGGCAAATACTACG
Mm_EGLN3_R	GCTCCACGTCTGCTACAAAC
Cp_Hg_EGLN3_R	GCTCCACATCTGCAATGAAT
Fd_EGLN3_R	GTTCCACATCTGCAATGAAT
Mm_PPARG_F	AAACTCCCTCATGGCCATTG
Cp_PPARG_F	AACTCGCTCATGGCCATCGA
Fd_Hg_PPARG_F	AACTCCCTCATGGCCATCGA
Mm_PPARG_R	TGTGGATCCGGCAGTTAAGA
Cp_Fd_Hg_PPARG_R	TGTGGATCCGACAGTTAAGA
Mm_Fd_Hg_PC_F	CAGACATCATCAAGGTGGCC
Cp_PC_F	CGGATATCATCAAGGTGGCC
Mm_PC_R	CTTGGACCAATGAACCGGAC
Cp_PC_R	CTTGGCCCAATGAAGCGGAC
Fd_PC_R	CTCGGCCCGATGAATCGGAC
Hg_PC_R	CTCGGCCCAATGAAGCGGAC
Mm_FBP1_F	GCGATCAAAGCCATCTCGTC
Cp_Fd_Hg_FBP1_F	GCGGTCAAAGCCATCTCCTC
Mm_FBP1_R	CACAAGAACACAGGTAGCGT
Cp_FBP1_R	CACAAGAACACAGGTGGAGA
Hg_FBP1_R	CACAAGGACACAGGTGGAGA
Fd_FBP1_R	CACGAGGACACAGGTGGAGA
