# Supplementary figures and images for: Phylogenetic modeling of enhancer shifts in African mole-rats reveals regulatory changes associated with tissue-specific traits
Source: HighWire-hosted journal article supplement (doi:10.1101/gr.277715.123), 2023-08-25

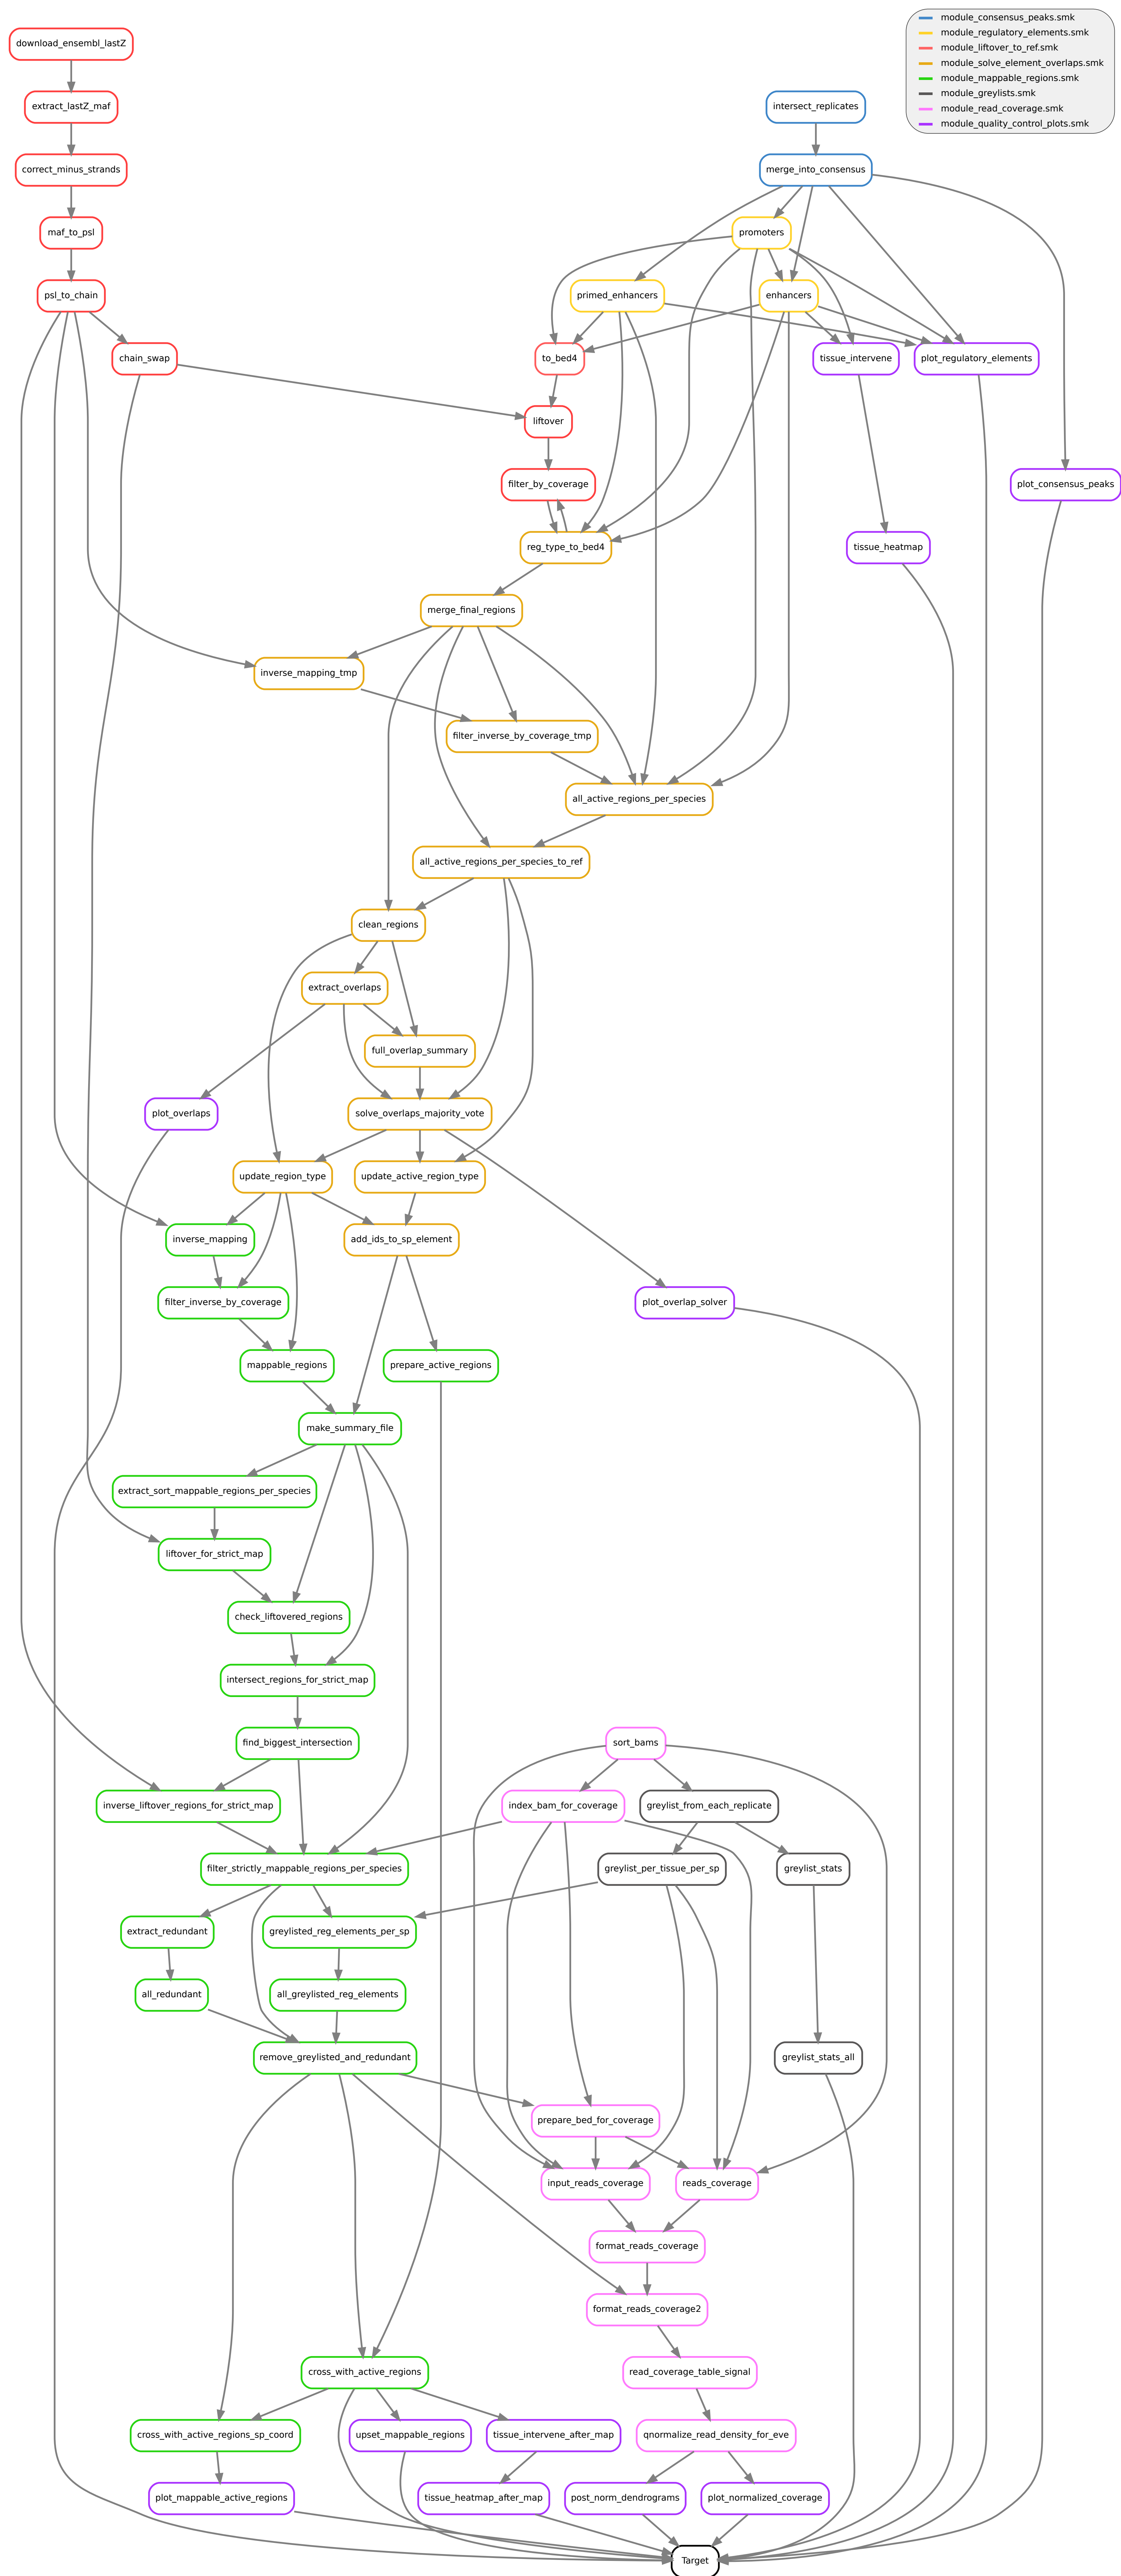

Supplement: Supplemental_Code_Datasets.zip [file nmrdmr_pipeline_dag.pdf › mole-rats_code_datasets/code/nmrdmr_pipeline/documentation/nmrdmr_pipeline_dag.pdf]
